# Supplementary material for: Regiospecific N‐Arylation of Aliphatic Amines under Mild and Metal‐Free Reaction Conditions
Source: PubMed Central journal article supplement — Angew Chem Int Ed Engl. 2018 Jul 26;57(35):11427–31. doi: 10.1002/anie.201807001 (PMC6120470; doi:10.1002/anie.201807001), 2018-07-26

Supporting Information

**Regiospecific N-Arylation of Aliphatic Amines under Mild and Metal-Free Reaction Conditions**

*Nibadita Purkait, Gabriella Kervefors, Erika Linde, and Berit Olofsson\**

anie\_201807001\_sm\_miscellaneous\_information.pdf

# Supporting Information

## Table of Contents

|          |                                                                 |           |
|----------|-----------------------------------------------------------------|-----------|
| <b>1</b> | <b>General Experimental Procedure</b>                           | <b>2</b>  |
| <b>2</b> | <b>Synthesis of Diaryliodonium Salts</b>                        | <b>2</b>  |
| 2.1      | <i>Our One-Pot Methods</i>                                      | 2         |
| 2.2      | <i>Synthesis of Novel Diaryliodonium Salts</i>                  | 5         |
| 2.3      | <i>Other Methods used for Synthesis of Diaryliodonium Salts</i> | 6         |
| <b>3</b> | <b>Investigation of the N-Arylation of Amines</b>               | <b>7</b>  |
| 3.1      | <i>Optimization of Nitrophenylation</i>                         | 7         |
| 3.2      | <i>Comparison to literature</i>                                 | 8         |
| 3.3      | <i>Optimization of Phenylation</i>                              | 8         |
| 3.4      | <i>General Procedure for N-arylation of Amines</i>              | 9         |
| 3.5      | <i>Competition experiment</i>                                   | 9         |
| 3.6      | <i>Scope (in color)</i>                                         | 10        |
| <b>4</b> | <b>Preliminary Mechanistic investigation</b>                    | <b>11</b> |
| <b>5</b> | <b>Analytical Data of Arylamines 3-5</b>                        | <b>13</b> |
| <b>6</b> | <b>References</b>                                               | <b>29</b> |
| <b>7</b> | <b>NMR Spectra</b>                                              | <b>30</b> |

# 1 General Experimental Procedure

All reactions were carried out in oven-dried glassware unless otherwise noted. Toluene was dried using a VAC-purification system, and degassed for 15 minutes by bubbling argon through a long needle prior to all reactions. Diaryliodonium salts and bases were dried under vacuum and stored in a desiccator. The amine substrates were either newly purchased, freshly distilled or purified through a silica plug prior to use. *m*CPBA (Aldrich, 77% active oxidant) was dried at RT on high vacuum for several hours, and titrated by iodometric titration<sup>[1]</sup> prior to use. TLC analysis was performed on pre-coated Merck silica gel 60 F254 plates using UV light. Column chromatography was conducted by flash column chromatography using 40 - 60  $\mu\text{m}$ , 60  $\text{\AA}$  silica gel as stationary phase. Flash column chromatography was done on  $\text{SiO}_2$  purchased from Aldrich (technical grade, 60  $\text{\AA}$  pore size, 230-400 mesh, 40-63  $\mu\text{m}$ ). Melting points were measured using a STUART SMP3 and are reported uncorrected. The melting point measurements refer to the solidified materials as the result of the given experimental procedures, no additional recrystallization was done. All NMR spectra were recorded using a 400 MHz Bruker AVANCE II with a BBO probe at 298 K using  $\text{CDCl}_3$  as solvent. Chemical shifts are given in ppm relative to the residual solvent peak ( $^1\text{H}$  NMR:  $\text{CDCl}_3$   $\delta$  7.26, DMSO  $\delta$  2.50,  $\text{CD}_3\text{OD}$   $\delta$  3.31;  $^{13}\text{C}$  NMR:  $\text{CDCl}_3$   $\delta$  77.16, DMSO  $\delta$  39.52,  $\text{CD}_3\text{OD}$   $\delta$  49.00) with multiplicity (b = broad, s = singlet, d = doublet, t = triplet, q = quartet, p = pentet, m = multiplet, app.= apparent), coupling constants (in Hz) and integration. High-resolution mass analyses were obtained using a Bruker microTOF ESI. High performance liquid chromatography was performed on or Waters Alliance 2695 equipped with a Waters 2489 UV/VIS detector. Full analytical data is given if the compound is novel or not fully characterized in the literature; for literature reported compounds only  $^1\text{H}$  NMR and  $^{13}\text{C}$  NMR are given.

## 2 Synthesis of Diaryliodonium Salts

### 2.1 Our One-Pot Methods

The majority of the diaryliodonium salts used in this investigation were synthesized according to the one-pot procedures developed in the Olofsson group using Methods I-V in Table S1. The reactions were run without precautions to avoid air or moisture, and sometimes combined with an anion exchange. Anion exchanges can either be performed in situ, by addition of the appropriate acid,<sup>[2]</sup> or by treatment with the a solution of the appropriate sodium salt<sup>[3]</sup> (Scheme S1). Reaction details are given in Table S2.

**Table S1.** Our methods for one-pot synthesis of diaryliodonium salts.

|                    |  |
|--------------------|--|
| I <sup>[4]</sup>   |  |
| II <sup>[4]</sup>  |  |
| III <sup>[5]</sup> |  |
| IV <sup>[2]</sup>  |  |
| V <sup>[2]</sup>   |  |

**Scheme S1.** Anion exchanges<sup>[3]</sup>

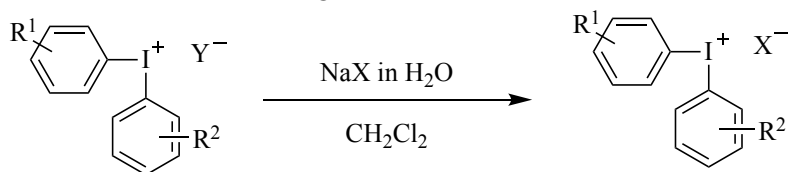

NaX (85 mmol) was dissolved in H<sub>2</sub>O (100 mL). The diaryliodonium salt (3.4 mmol) was dissolved in CH<sub>2</sub>Cl<sub>2</sub> (20 mL) and washed 5 x 20 mL with the aqueous solution of NaX. The organic layer was concentrated without drying. Et<sub>2</sub>O was added and the mixture was stirred at RT for 30 min. The solid was filtered, washed with Et<sub>2</sub>O and dried under vacuum. The method was used to exchange BF<sub>4</sub> to OTs using NaOTs, and to exchange OTs to OTf using NaOTf.

**Table S2.** Synthesis of diaryliodonium salts and references to analytical data.

|           | Diaryliodonium salt | Method            | Acid (equiv) | T (°C)         | Time              | Yield (%) | Ref.   |
|-----------|---------------------|-------------------|--------------|----------------|-------------------|-----------|--------|
| <b>2a</b> |                     | I                 | 2.0          | rt             | 15 h              | 85        | [4, 6] |
| <b>2c</b> |                     | III               | 2.5          | rt             | 90 min            | 50        | [7]    |
| <b>2g</b> |                     | IV <sup>[a]</sup> | 1.1          | 1) 60<br>2) rt | 1) 2 h<br>2) 18 h | 96        | [8]    |
| <b>2h</b> |                     | I                 | 3.0          | rt             | 1 h               | 93        | [4, 6] |
| <b>2i</b> |                     | I                 | 2.0          | rt             | 18 h              | 79        | [4, 9] |
| <b>2j</b> |                     | I                 | 2.0          | rt             | 15 h              | 89        | [6]    |
| <b>2k</b> |                     | I                 | 2.0          | 80             | 15 h              | 63        | [4, 6] |
| <b>2l</b> |                     | IV                | 1.1          | 40             | 4 h               | 74        | [2, 9] |



|           |  |                  |     |               |                        |    |         |
|-----------|--|------------------|-----|---------------|------------------------|----|---------|
| <b>2m</b> |  | I                | 3.0 | 0             | 1 h                    | 91 | [4, 6]  |
| <b>2n</b> |  | I                | 2.0 | rt            | 10 min                 | 52 | [4, 6]  |
| <b>2o</b> |  | II               | 5.0 | rt            | 20 min                 | 78 | [4, 6]  |
| <b>2p</b> |  | V <sup>[b]</sup> | 1.0 | rt            | 14 h                   | 71 | [10]    |
| <b>2q</b> |  | IV               | 1.0 | rt            | 18 h                   | 58 | [2, 11] |
| <b>2r</b> |  | II               | 4.0 | 0 to rt       | 6 h                    | 92 | [12]    |
| <b>2u</b> |  | II               | 4.0 | rt            | 1 h                    | 52 | [6]     |
| <b>2v</b> |  | I <sup>[c]</sup> | 4.0 | 1) 60<br>2) 0 | 1) 30 min<br>2) 10 min | 81 | [13]    |

<sup>[a]</sup> Synthesized by stepwise addition. <sup>[b]</sup> *In situ* anion exchange by treatment with TfOH. <sup>[c]</sup> Stepwise addition of H<sub>2</sub>O (2 equiv) at 0 °C.

## 2.2 Synthesis of Novel Diaryliodonium Salts

### Synthesis of (2-fluoro-4-nitrophenyl)(phenyl)iodonium trifluoromethanesulfonate (**2s**):

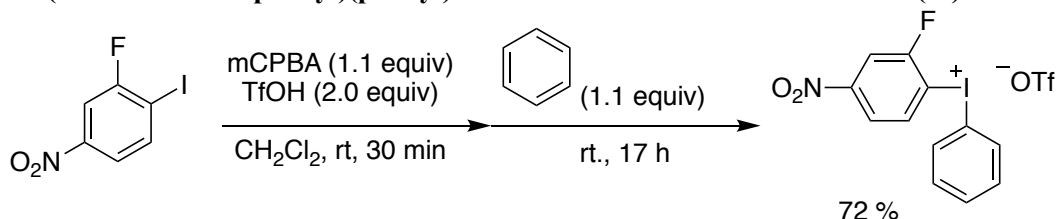

*m*CPBA (2.06 mmol, 1.1 equiv) was dissolved in DCM followed by the addition of 1-iodo-2-methyl-4-nitrobenzene (0.5 g, 1.87 mmol, 1 equiv). The solution was cooled down to 0 °C and TfOH (0.33 mL, 3.75 mmol, 2.0 equiv) was added dropwise. The mixture was allowed to reach rt over a 30 min time period. Benzene (0.185 mL, 2.06 mmol, 1.1 equiv) was then added to the solution, which continued to react for 17 h at rt. The solvent was removed under reduced pressure and excess of  $\text{Et}_2\text{O}$  (50 mL) was added which caused precipitation to occur. The crude was stored in the freezer >16 h, for further precipitation. The solid was filtrated off and washed with  $\text{Et}_2\text{O}$ , obtaining the product (**2s**) as off-white solid (0.663 g, 1.34 mmol, 72%); mp: 157.3 °C;  $^1\text{H}$  NMR (400 MHz,  $\text{DMSO-d}_6$ )  $\delta$  8.68 (dd,  $J = 8.7$  Hz, 5.9 Hz, 1H), 8.44 (dd,  $J = 8.1$  Hz, 2.4 Hz, 1H), 8.31 – 8.29 (m, 2H), 8.21 (dd,  $J = 8.7$  Hz, 2.4 Hz, 1H), 7.72 – 7.68 (m, 1 H), 7.58 – 7.54 (m 2H).  $^{13}\text{C}$  NMR (101 MHz,  $\text{DMSO}$ )  $\delta = 159.1$  (d,  $^1J_{\text{F-C}} = 252.0$  Hz), 151.3 (d,  $^3J_{\text{F-C}} = 8.5$  Hz), 138.0, 135.4, 132.5, 132.1, 122.1 (d,  $^3J_{\text{F-C}} = 3.5$  Hz), 120.7 ( $q$ ,  $J = 320$  Hz,  $\text{CF}_3\text{SO}_3^-$ ), 117.2, 112.5 (d,  $^2J_{\text{F-C}} = 28.7$  Hz), 110.8 (d,  $^2J_{\text{F-C}} = 24.1$  Hz).  $^{19}\text{F}$  NMR (377 MHz,  $\text{CDCl}_3$ )  $\delta$  -77.7 (s, 3F), -94.0 (s, 1F). HRMS (ESI): calcd for  $\text{C}_{12}\text{H}_8\text{FINO}_2$  ( $[\text{M} - \text{TfO}^-]$ ): 343.9578; found: 343.9595.

### Synthesis of (2-methyl-4-nitrophenyl)(phenyl)iodonium trifluoromethanesulfonate (**2t**):

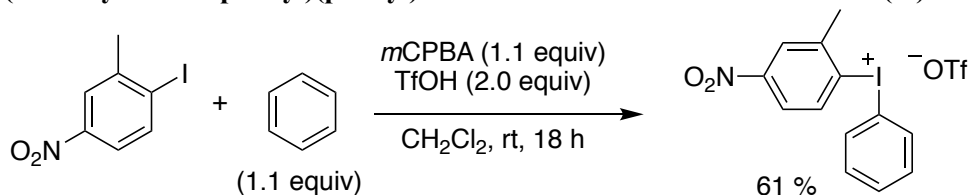

*m*CPBA (1.33 mmol, 1.1 equiv) was dissolved in DCM followed by the addition of 1-iodo-2-methyl-4-nitrobenzene (0.35 g, 1.31 mmol, 1 equiv) and benzene (0.13 mL, 1.46 mmol, 1.1 equiv). The solution was cooled down to 0 °C and TfOH (0.24 mL, 2.66 mmol, 2.0 equiv) was added dropwise. The mixture was allowed to reach rt and continued to react for 18 h at rt. The solvent was removed under reduced pressure and excess of  $\text{Et}_2\text{O}$  (50 mL) was added which caused precipitation to occur. The crude was stored in the freezer >16 h, for further precipitation. The solid was filtrated off and washed with  $\text{Et}_2\text{O}$ , obtaining the product (**2t**) as brown solid (0.400 g, 0.81 mmol, 61%); mp: 132.2 °C;  $^1\text{H}$  NMR (400 MHz,  $\text{DMSO-d}_6$ )  $\delta$  8.66 (d,  $J = 8.7$  Hz, 1H), 8.38 (d,  $J = 2.6$  Hz, 1H), 8.29 – 8.27 (m, 2H), 8.11, (dd,  $J = 8.7$  Hz, 2.6 Hz, 1H), 7.70 – 7.66 (m, 1H), 7.56 – 7.52 (m, 2H).  $^{13}\text{C}$  NMR (101 MHz,  $\text{DMSO-d}_6$ )  $\delta$  149.8, 143.1, 138.2, 135.3, 132.3, 132.0, 127.5, 125.5, 123.7, 120.7 ( $q$ ,  $J = 320$  Hz,  $\text{CF}_3\text{SO}_3^-$ ), 115.8, 24.9.  $^{19}\text{F}$  NMR (377 MHz,  $\text{CDCl}_3$ )  $\delta$  -77.74; HRMS (ESI): calcd for  $\text{C}_{13}\text{H}_{11}\text{INO}_2$  ( $[\text{M} - \text{TfO}^-]$ ): 339.9829; found: 339.9828.

### 2.3 Other Methods used for Synthesis of Diaryliodonium Salts

**Table S3.** Diaryliodonium salts synthesized by other methods.

|           |                                                                                     |                                                                                                                                                                                   |
|-----------|-------------------------------------------------------------------------------------|-----------------------------------------------------------------------------------------------------------------------------------------------------------------------------------|
| <b>2b</b> | 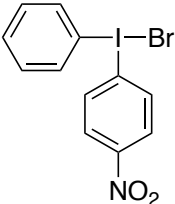   | 4-Nitrophenyl(phenyl)iodonium bromide ( <b>2b</b> ) <sup>[14]</sup> was prepared in 85% via an anion exchange from <b>2a</b> according to literature reports. <sup>[15]</sup>     |
| <b>2d</b> |    | 4-Nitrophenyl(phenyl)iodonium tosylate ( <b>2d</b> ) was prepared in 86% in a stepwise fashion, via isolation of the Koser reagent, following literature reports. <sup>[16]</sup> |
| <b>2e</b> |   | 4-Nitrophenyl(2,4,6-trimethoxyphenyl)iodonium tosylate ( <b>2e</b> ) was prepared in 90% according to literature reports. <sup>[15]</sup>                                         |
| <b>2f</b> |  | 4-Nitrophenyl(2,4,6-trimethoxyphenyl)iodonium trifluoroacetate ( <b>2f</b> ) was prepared in 85% according to literature reports. <sup>[17]</sup>                                 |

### 3 Investigation of the *N*-Arylation of Amines

#### 3.1 Optimization of Nitrophenylation

The arylation was initially optimized with amine **1a** and nitro salt **2a** in a 1:1 ratio in refluxing toluene, delivering alkyl aryl amine **3a** (Table S4). The reaction showed poor conversion in the absence of an external base, also upon increased loading of salt **2a** (entries 1-4). To the contrary, excess amine proved efficient, with the second equivalent of amine likely acting as base (entry 5). To avoid the need for excess amine, we investigated the addition of organic and inorganic bases with varying reaction time, and both triethylamine and sodium carbonate proved good (entries 6-14). Variation of times and temperature did not improve the yield further, neither did excess base (entries 14-19). The counterion of the diaryliodonium salts **2** proved important (entries 20-22).

**Table S4.** Optimization with nitrophenyl(phenyl)iodonium salts **2a-g**.

| Entry             | 1a (1 equiv) |            | 2a-g (1 equiv)             |        | Base (equiv)                              | Temp (°C)  | Time (h) | Isolated yield (%) |
|-------------------|--------------|------------|----------------------------|--------|-------------------------------------------|------------|----------|--------------------|
|                   | 1a (equiv)   | 2 (equiv)  | Salt 2 (X)                 | Ar     |                                           |            |          |                    |
| 1                 | 1.0          | 1.0        | <b>2a (OTf)</b>            | Ph     | -                                         | rt         | 24       | no rxn             |
| 2 <sup>[a]</sup>  | 1.0          | 1.0        | <b>2a (OTf)</b>            | Ph     | -                                         | 110        | 1        | 35                 |
| 3 <sup>[a]</sup>  | 1.1          | 1.0        | <b>2a (OTf)</b>            | Ph     | -                                         | 110        | 1        | 49                 |
| 4 <sup>[a]</sup>  | 1.0          | 2.0        | <b>2a (OTf)</b>            | Ph     | -                                         | 110        | 2        | 25                 |
| 5                 | 2.0          | 1.0        | <b>2a (OTf)</b>            | Ph     | -                                         | 110        | 2        | 86                 |
| 6                 | 1.0          | 1.0        | <b>2a (OTf)</b>            | Ph     | K <sub>3</sub> PO <sub>4</sub> (1.0)      | 110        | 1        | 63                 |
| 7                 | 1.0          | 1.0        | <b>2a (OTf)</b>            | Ph     | K <sub>3</sub> PO <sub>4</sub> (1.5)      | 110        | 1        | 51                 |
| 8                 | 1.0          | 1.0        | <b>2a (OTf)</b>            | Ph     | K <sub>2</sub> CO <sub>3</sub> (1.0)      | 110        | 1        | 56                 |
| 9                 | 1.0          | 1.0        | <b>2a (OTf)</b>            | Ph     | Cs <sub>2</sub> CO <sub>3</sub> (1.0)     | 110        | 1        | 17                 |
| 10                | 1.0          | 1.0        | <b>2a (OTf)</b>            | Ph     | Et <sub>3</sub> N (1.0)                   | 110        | 1        | 59                 |
| 11                | 1.0          | 1.0        | <b>2a (OTf)</b>            | Ph     | Et <sub>3</sub> N (1.0)                   | 110        | 2        | 74                 |
| 12                | 1.0          | 1.0        | <b>2a (OTf)</b>            | Ph     | Et <sub>3</sub> N (1.0)                   | 90         | 4        | 70                 |
| 13                | 1.1          | 1.0        | <b>2a (OTf)</b>            | Ph     | KF (1.5)                                  | 110        | 2        | 44                 |
| 14                | 1.0          | 1.0        | <b>2a (OTf)</b>            | Ph     | Na <sub>2</sub> CO <sub>3</sub> (1.0)     | 110        | 1        | 68                 |
| <b>15</b>         | <b>1.0</b>   | <b>1.0</b> | <b>2a (OTf)</b>            | Ph     | <b>Na<sub>2</sub>CO<sub>3</sub> (1.0)</b> | <b>110</b> | <b>4</b> | <b>81</b>          |
| 16                | 1.0          | 1.0        | <b>2a (OTf)</b>            | Ph     | Na <sub>2</sub> CO <sub>3</sub> (1.0)     | 110        | 6        | 80                 |
| 17                | 1.0          | 1.0        | <b>2a (OTf)</b>            | Ph     | Na <sub>2</sub> CO <sub>3</sub> (1.0)     | 90         | 1        | 28                 |
| 18                | 1.0          | 1.0        | <b>2a (OTf)</b>            | Ph     | Na <sub>2</sub> CO <sub>3</sub> (1.0)     | 90         | 22       | 70                 |
| 19                | 1.0          | 1.0        | <b>2a (OTf)</b>            | Ph     | Na <sub>2</sub> CO <sub>3</sub> (2.0)     | 110        | 1        | 63                 |
| 20                | 1.0          | 1.0        | <b>2b (Br)</b>             | Ph     | Na <sub>2</sub> CO <sub>3</sub> (1.0)     | 110        | 4        | 4                  |
| 21                | 1.0          | 1.0        | <b>2c (BF<sub>4</sub>)</b> | Ph     | Na <sub>2</sub> CO <sub>3</sub> (1.0)     | 110        | 4        | 54                 |
| 22                | 1.0          | 1.0        | <b>2d (OTs)</b>            | Ph     | Na <sub>2</sub> CO <sub>3</sub> (1.0)     | 110        | 4        | 77                 |
| 23                | 1.0          | 1.0        | <b>2e (OTs)</b>            | TMP    | Na <sub>2</sub> CO <sub>3</sub> (1.0)     | 110        | 4        | 62                 |
| 24                | 1.0          | 1.0        | <b>2f (TFA)</b>            | TMP    | Na <sub>2</sub> CO <sub>3</sub> (1.0)     | 110        | 4        | 43                 |
| 25                | 1.0          | 1.0        | <b>2g (OTs)</b>            | Anisyl | Na <sub>2</sub> CO <sub>3</sub> (1.0)     | 110        | 4        | 36                 |
| 26 <sup>[b]</sup> | 1.0          | 1.0        | <b>2a (OTf)</b>            | Ph     | Na <sub>2</sub> CO <sub>3</sub> (1.0)     | 110        | 4        | 5% conv.           |
| 27 <sup>[c]</sup> | 2.0          | 1.0        | <b>2a (OTf)</b>            | Ph     | -                                         | 110        | 15       | 77                 |

Reaction conditions: Diaryliodonium salt **2** (0.1 mmol), base and amine **1a** were added to a vial under argon. Anhydrous and degassed toluene (0.5 mL) was added and the mixture was stirred at the specified temperature. <sup>[a]</sup> Toluene not degassed, <sup>[b]</sup> In presence of air. <sup>[c]</sup> 1, 1-diphenylethylene (DPE, 2.0 equiv) added.

Unsymmetric salts **2e** and **2f**, with a trimethoxyphenyl (TMP) as “dummy” delivered the product in moderate yield (entries 23-24). A salt with an anisyl dummy (**2g**) could also be chemoselectively employed in moderate yield (entry 25). The reaction was severely retarded in the presence of air (entry 25), whereas addition of the radical trap 1, 1-diphenylethelene (DPE) did not influence the reaction much (compare entries 5 and 27).

### 3.2 Comparison to literature

Only decomposition was observed when **1a** was reacted with **2f** using Stuart’s recently reported procedure for cyclic amines (Scheme S3).<sup>[18]</sup>

Scheme S3. Literature comparison.

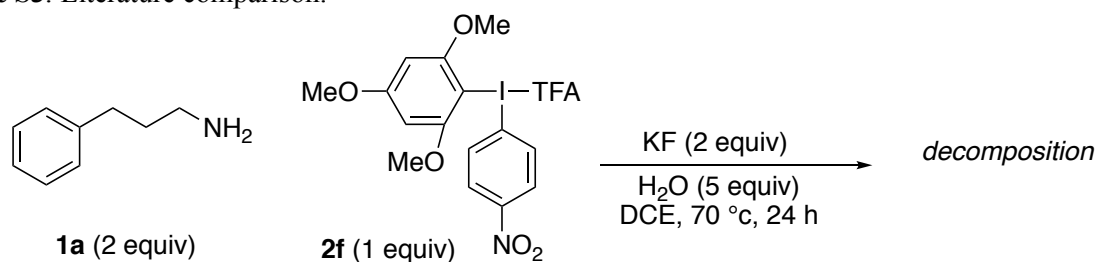

### 3.3 Optimization of Phenylation

The phenylation of **1a** with Ph<sub>2</sub>IOTf (**2h**) was briefly investigated with different bases, delivering the product **3p** in moderate yields together with some diphenylated product **3p'** (Table S5). Triethylamine was found to give a poor ratio of **3p** and **3p'**, and sodium carbonate was again the best choice. Longer reaction time was needed to reach good conversion, and 22 h was used as standard. The separation of **3p** and **3p'** resulted in a yield drop, and **3p** was isolated in 52% with equimolar amounts of **1a** and **2h** (entry 5). The product ratio was improved by employing slight excess of **1a** and **3p** was isolated in 66% using 1.5 equiv **1a** (entry 7). Further increase to 2 equiv **1a** completely suppressed the formation of **3p'**, and **3p** was obtained in 74% yield (entry 8).

Table S5. Optimization with diphenyliodonium triflate (**2h**).

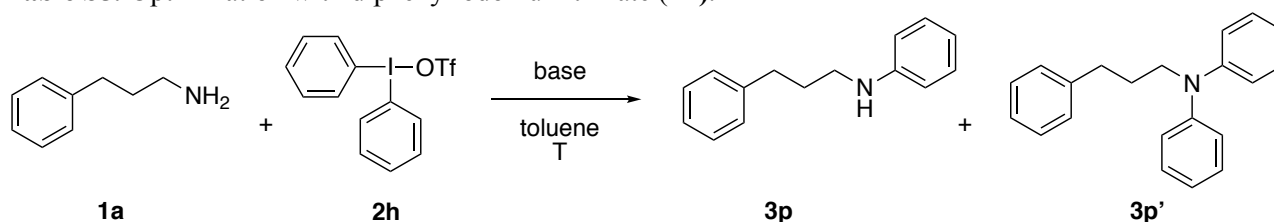

| Entry            | <b>1a</b><br>(equiv) | <b>2h</b><br>(equiv) | Base (equiv)                          | Temp<br>(°C) | Time<br>(h) | Isolated yields (%) |            |
|------------------|----------------------|----------------------|---------------------------------------|--------------|-------------|---------------------|------------|
|                  |                      |                      |                                       |              |             | <b>3p</b>           | <b>3p'</b> |
| 1                | 1.0                  | 1.0                  | K <sub>3</sub> PO <sub>4</sub> (1.0)  | 110          | 19          | 33                  | 5          |
| 2                | 2.0                  | 1.0                  | K <sub>3</sub> PO <sub>4</sub> (1.0)  | 110          | 21          | 45                  | 5          |
| 3                | 2.0                  | 1.0                  | K <sub>3</sub> PO <sub>4</sub> (1.0)  | 80           | 21          | Only 5% conversion  |            |
| 4 <sup>[a]</sup> | 1.0                  | 1.0                  | NEt <sub>3</sub> (1.0)                | 110          | 22          | 43                  | 20         |
| 5 <sup>[a]</sup> | 1.0                  | 1.0                  | Na <sub>2</sub> CO <sub>3</sub> (1.0) | 110          | 22          | <b>52</b>           | 8          |
| 6 <sup>[a]</sup> | 1.0                  | 1.0                  | Na <sub>2</sub> CO <sub>3</sub> (1.0) | 90           | 22          | 29                  | traces     |
| 7 <sup>[a]</sup> | 1.5                  | 1.0                  | Na <sub>2</sub> CO <sub>3</sub> (1.0) | 110          | 22          | <b>66</b>           | 7          |
| 8 <sup>[a]</sup> | 2.0                  | 1.0                  | Na <sub>2</sub> CO <sub>3</sub> (1.0) | 110          | 22          | <b>74</b>           | traces     |

Reaction conditions: Diaryliodonium salt **2h** (0.1 mmol), base and amine **1a** were added to a vial under argon, anhydrous toluene (0.5 mL) was added and the mixture was stirred at the specified temperature. <sup>a</sup> The toluene was degassed.

While use of excess amine resulted in improved yield of product **3p**, this is not ideal from an atom efficiency point of view. We hence continued the scope investigation with 1 equiv amine as the standard conditions, and only investigated the use of 1.5 equiv amine when the obtained yield was modest (footnote b in Scheme 2).

Formation of minor amounts of diphenylated product was often observed, this could in all cases be separated from the desired product. Surprisingly, diarylation was the only product in phenylation of 2-(2-pyridyl)ethylamine under standard conditions (Scheme S4). No monoarylated product was observed, despite the use of equimolar amounts of amine and **2h**. This illustrates the different reactivity of salts **2a** and **2h**, as the former reagent selectively yielded the monoarylated product **3i**.

**Scheme S4.** Diarylation (the yield of **4** is calculated based on **2h**, which is the limiting reagent).

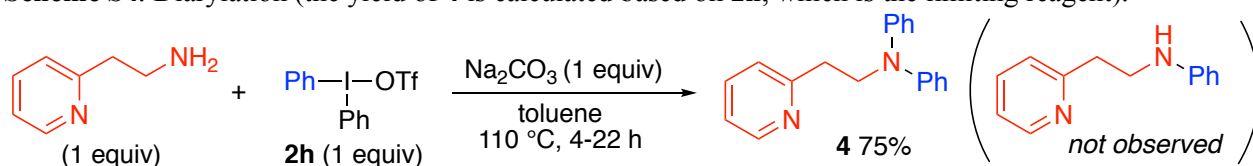

Attempts to synthesize other diarylamines as the major product with other substrates, by employing 2 equiv of salt **2h**, mainly resulted in decomposition.

### 3.4 General Procedure for N-arylation of Amines

Diaryliodonium salt **2** (0.1 mmol) and  $\text{Na}_2\text{CO}_3$  (0.1 mmol, 1.0 equiv) were added to an oven-dried microwave vial, which was sealed with a microwave vial cap. The vial was kept in vacuum for 15 minutes through a needle and then flushed with argon. This procedure was repeated for 3 to 4 times. Amine **1** (0.1 mmol, 1.0 equiv) was added via syringe. Finally anhydrous and degassed toluene (0.5 mL) was added, and the mixture was stirred at  $110\text{ }^\circ\text{C}$  in a preheated oil bath. After the completion of the reaction, it was brought down to RT. The whole mixture was subjected to purification by silica gel column chromatography, without prior concentration, using a pentane/ethyl acetate or pentane/diethyl ether gradient to obtain arylamine **3-5**.

### 3.5 Competition experiment

A clear preference for arylation of the secondary, cyclic amine morpholine over the primary amine was observed (Scheme S3).

**Scheme S5.** Competition between a cyclic, secondary amine and a primary amine.

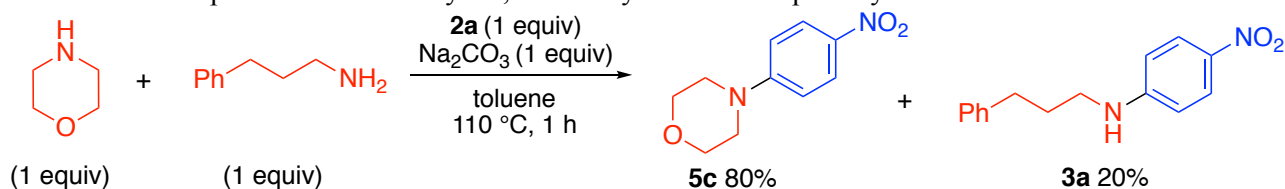

### 3.6 Scope (in color)

#### Scheme S6. Arylation of primary amines

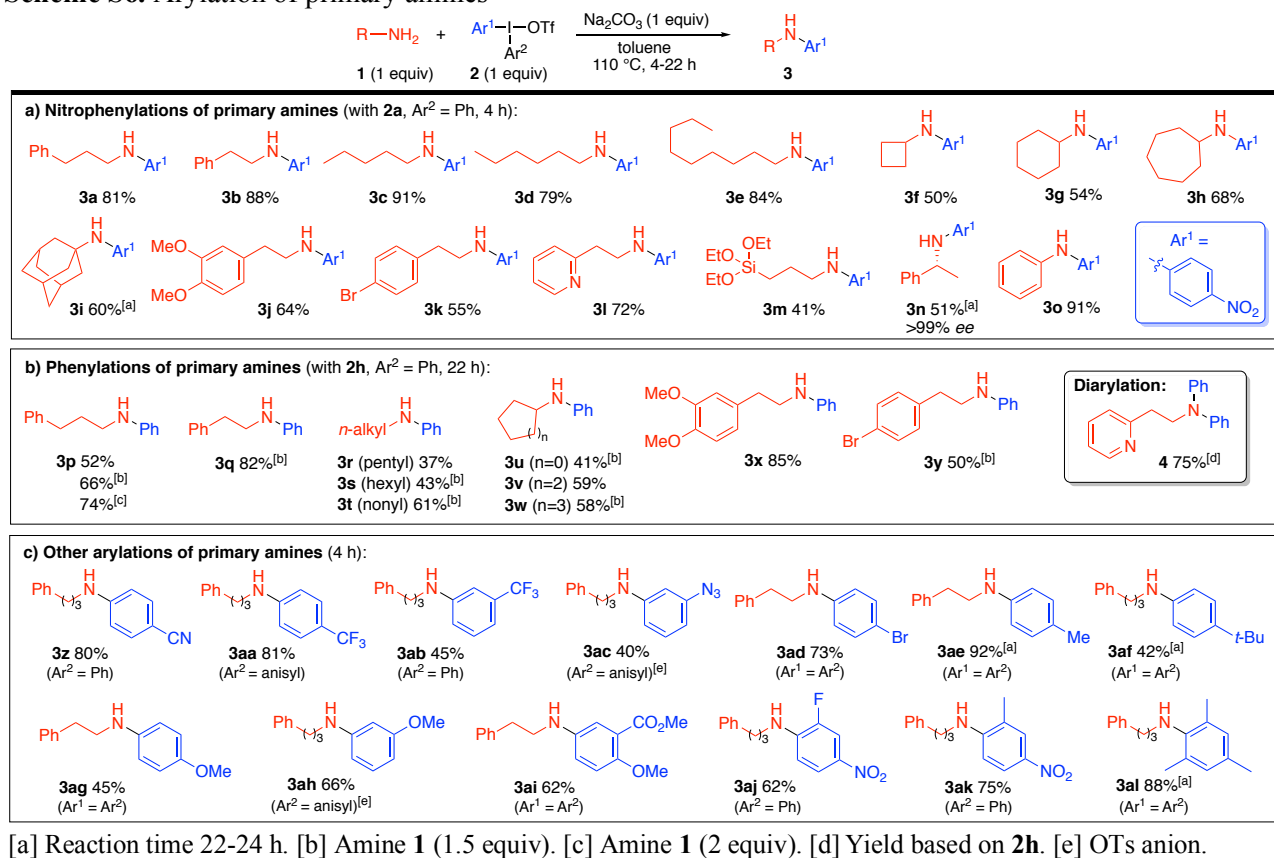

[a] Reaction time 22-24 h. [b] Amine 1 (1.5 equiv). [c] Amine 1 (2 equiv). [d] Yield based on 2h. [e] OTs anion.

#### Scheme S7. Arylation of secondary amines

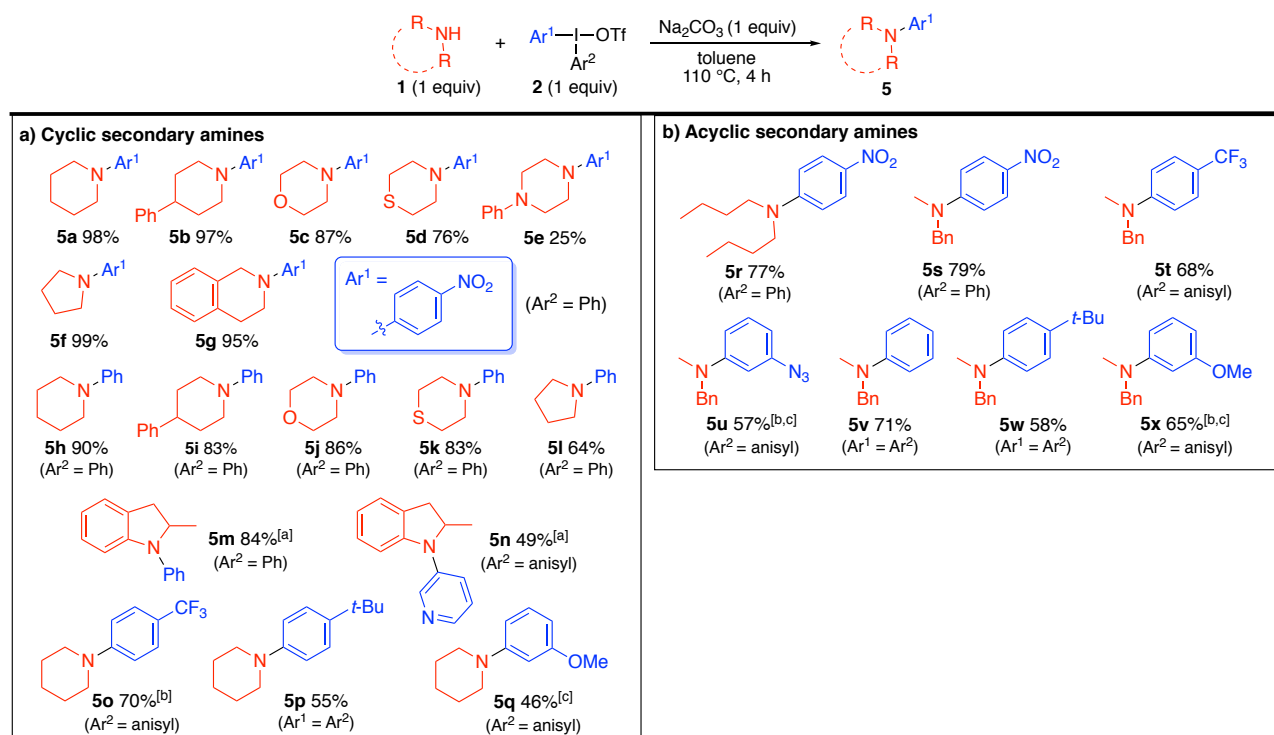

[a] Reaction time 22 h. [b] Inseparable from Ar<sup>2</sup>I. [c] OTs anion.

## 4 Preliminary Mechanistic investigation

We have recently performed a thorough mechanistic study of O-arylations with diaryliodonium salts, using both experimental techniques and calculations. In this study, it was shown that arynes readily formed under basic conditions already at room temperature.<sup>[19]</sup> Arynes were identified using two approaches:

- 1) the use of an iodonium salt with EDG substituents gives regioisomers if arynes are involved.
- 2) addition of furan as an aryne trap results in significant formation of the cycloaddition product expected from benzyne.

With this knowledge at hand, we decided to check for arynes in the early stages of the N-arylation project, when *t*-BuOK was used as the base in reactions with Ph<sub>2</sub>IOTf (Scheme S6a). While good yields could be obtained with excess base in DCM, the conditions were similar to those where arynes were formed in the O-arylation. Indeed, the reaction shown in Scheme S6b gave a regioisomeric mixture, confirming that the product is formed through arynes rather than through ligand coupling, which is regioselective. Furthermore, the addition of furan as an aryne trap resulted in significant formation of the cycloaddition product expected from benzyne (Scheme S6c).

**Scheme S6.** Aryne formation under the initially employed conditions.

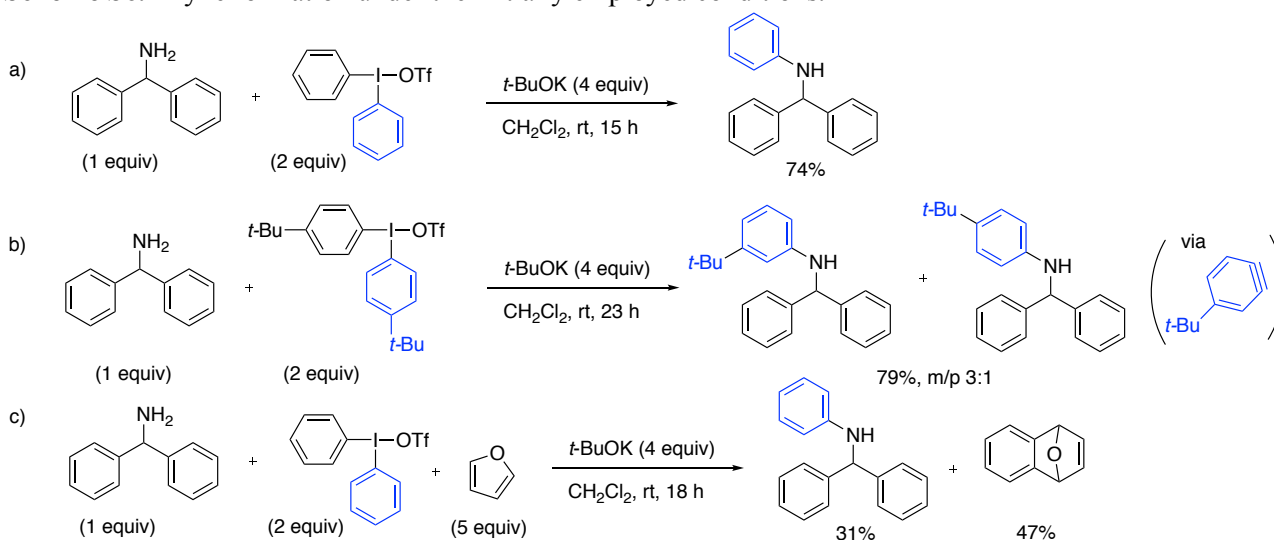

Milder conditions were thus investigated, and the reaction proceeded well with the weak base sodium carbonate in refluxing toluene (see Sections 3.3 and 3.5). Under those conditions, only one product was formed in arylations with EDG-substituted salts (e.g. products **3ae-3ah**, **5p**, **5q**, **5w**, **5x**). This is a strong indication that arynes are not formed under the optimized reaction conditions.

Another standard control experiment is the addition of the radical scavenger 1,1-diphenylethylene (DPE), which can drastically influence arylations where radicals are formed. We have previously reported that addition of DPE in arylation of phenols with Ph<sub>2</sub>IOTs allows the reaction to proceed well, as a nonproductive radical pathway was inhibited.<sup>[3a]</sup> To the contrary, product formation that proceeds via a radical pathway can be hampered upon addition of DPE.

The addition of DPE to the N-arylation reactions had no significant effect (see Table S4 entry 27), and we hence believe that radicals are not involved in the product formation.



Based on the absence of arynes and radicals, we suggest that the arylation proceeds via ligand coupling mechanism (Scheme S7). This type of mechanism has strong support from several theoretical studies of diaryliodonium salts with a variety of nucleophiles under metal-free conditions.<sup>[3b, 19-20]</sup>

Many nucleophiles are deprotonated prior to the reaction with the diaryliodonium salt. However, our conditions use a weak base, and the amine reacts with the diaryliodonium salt to give the charged T-shaped intermediate **A** prior to deprotonation by the base or excess amine, yielding intermediate **B**. This intermediate might be in fast equilibrium with the corresponding four-coordinated intermediate **C**, and either of them could undergo ligand coupling to form the product and ArI. We recently reported similar four-coordinated intermediates in our mechanistic study on *O*-arylation with aliphatic alcohols, with support from both experimental and theoretical results.<sup>[19]</sup> The experimental support for intermediate **C** in *N*-arylations is only preliminary, and includes that the reaction proceeds better with 2 equiv amine (see Table S4 and product **3p**), and that reactions with equimolar amounts of amine and iodonium salts rarely reach completion despite extended reaction times. This can be compared to the competition experiment shown in Scheme S5, which gave quantitative combined yield of **5c** and **3a**.

**Scheme S7.** Suggested mechanism.

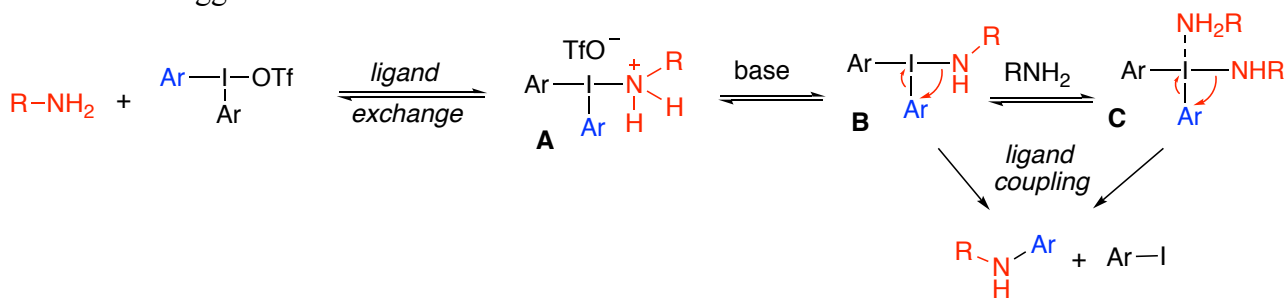

Nucleophilic aromatic substitution can rarely compete with ligand coupling in reactions with diaryliodonium salts, despite the very good leaving group ability of ArI. We found this to be a possibility only in the arylation of hydroxide with salt **2a**, whereas the arylation of aliphatic alcohols proceeded by ligand coupling with all investigated iodonium salts.<sup>[19]</sup> In analogy with that, we do not believe that the *N*-arylation proceeds via nucleophilic aromatic substitution, but have not performed such studies yet. We plan to perform a thorough mechanistic investigation of the *N*-arylation to investigate kinetics and observe any intermediates. The latter is generally difficult, as the reactions are heterogeneous and difficult to follow by NMR.

## 5 Analytical Data of Arylamines 3-5

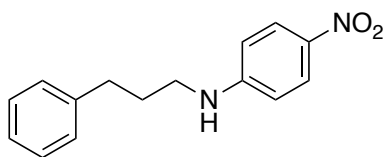

**4-Nitro-*N*-(3-phenylpropyl)aniline (3a):** 3-Phenylpropyl-1-amine (**1a**, 0.014 mL, 0.1 mmol) was arylated with salt **2a** (0.048 g, 1.0 equiv) according to the general procedure in toluene (0.5 mL) for 4 h. Purified by column chromatography (pentane/EtOAc 100:0 to 9:1), to give **3a** (0.0207 g, 0.081 mmol, 81%) as a yellow solid.  $R_f = 0.1$  in 5% pentane/ethyl acetate.  $^1\text{H NMR}$  (400 MHz,  $\text{CDCl}_3$ )  $\delta$  8.11 – 8.03 (m, 2H), 7.35 – 7.28 (m, 2H), 7.26 – 7.22 (m, 1H), 7.22 – 7.17 (m, 2H), 6.51 – 6.42 (m, 2H), 4.40 (br. s, 1H), 3.24 (td,  $J = 7.4, 5.5$  Hz, 2H), 2.75 (t,  $J = 7.4$  Hz, 2H), 2.00 (app. p,  $J = 7.4$  Hz, 2H).  $^{13}\text{C NMR}$  (101 MHz,  $\text{CDCl}_3$ )  $\delta$  153.4, 141.0, 138.1, 128.8, 128.5, 126.6, 126.4, 111.1, 42.9, 33.3, 30.6. The analytical data are consistent with previous reports.<sup>[21]</sup>

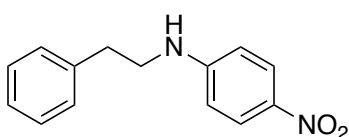

**4-Nitro-*N*-(2-phenylethyl)aniline (3b):** 2-Phenylethan-1-amine (**1b**, 0.013 mL, 0.1 mmol) was arylated with salt **2a** (0.048 g, 1.0 equiv) according to the general procedure in toluene (0.5 mL) for 4 h. Purified by column chromatography (pentane/EtOAc 100:0 to 9:1), to give **3b** (0.0212 g, 0.088 mmol, 88%) as a yellow oil.  $R_f = 0.2$  in 10% pentane/ethyl acetate.  $^1\text{H NMR}$  (400 MHz,  $\text{CDCl}_3$ )  $\delta$  8.10 – 8.06 (m, 2H), 7.37 – 7.31 (m, 2H), 7.30 – 7.24 (m, 1H), 7.24 – 7.20 (m, 2H), 6.54 – 6.50 (m, 2H), 4.51 (br. s, 1H), 3.51 (q,  $J = 6.8$  Hz, 2H), 2.96 (t,  $J = 7.0$  Hz, 2H).  $^{13}\text{C NMR}$  (101 MHz,  $\text{CDCl}_3$ )  $\delta$  153.2, 138.3, 138.3, 129.0, 128.8, 127.0, 126.6, 111.3, 44.5, 35.2. HRMS (ESI): calcd for  $\text{C}_{14}\text{H}_{14}\text{NaN}_2\text{O}_2$  [ $\text{M}+\text{Na}$ ] $^+$ : 265.0947; found: 265.0957.

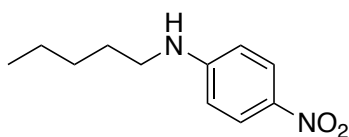

**4-Nitro-*N*-pentylaniline (3c):** Pentan-1-amine (**1c**, 0.012 mL, 0.1 mmol) was arylated with salt **2a** (0.048 g, 1.0 equiv) according to the general procedure in toluene (0.5 mL) for 4 h. Purified by column chromatography (pentane/EtOAc 100:0 to 19:1), to give **3c** (0.019 g, 0.091 mmol, 91%) as a yellow solid.  $R_f = 0.2$  in 5% pentane/ethyl acetate.  $^1\text{H NMR}$  (400 MHz,  $\text{CDCl}_3$ )  $\delta$  8.10 – 8.06 (m, 2H), 6.53 – 6.49 (m, 2H), 4.46 (br. s, 1H), 3.20 (td,  $J = 7.2, 5.4$  Hz, 2H), 1.70 – 1.60 (m, 2H), 1.44–1.33 (m, 4H), 0.98 – 0.90 (m, 3H).  $^{13}\text{C NMR}$  (101 MHz,  $\text{CDCl}_3$ )  $\delta$  153.5, 138.0, 126.6, 111.0, 43.6, 29.3, 29.0, 22.5, 14.1. The analytical data are consistent with previous reports.<sup>[22]</sup>

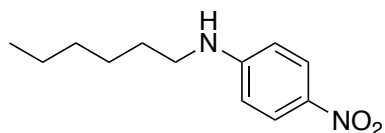

**4-Nitro-*N*-hexylaniline (3d):** Hexan-1-amine (**1d**, 0.013 mL, 0.1 mmol) was arylated with salt **2a** (0.048 g, 1.0 equiv) according to the general procedure in toluene (0.5 mL) for 4 h. Purified by column chromatography (pentane/EtOAc 100:0 to 19:1), to give **3d** (0.0175 g, 0.079 mmol, 79%) as a yellow solid.  $R_f = 0.6$  in 10% pentane/ethyl acetate.  $^1\text{H NMR}$  (400 MHz,  $\text{CDCl}_3$ )  $\delta$  8.10 – 8.06 (m, 2H), 6.53 – 6.49 (m, 2H), 4.47 (br. s, 1H), 3.20 (td,  $J = 7.2, 5.4$  Hz, 2H), 1.69 – 1.61 (m, 2H), 1.46 – 1.30 (m, 6H), 0.94 – 0.87 (m, 3H).  $^{13}\text{C NMR}$  (101 MHz,  $\text{CDCl}_3$ )  $\delta$  153.6, 126.6, 111.1, 43.6, 31.6, 29.3, 26.8, 22.7, 14.1. The analytical data are consistent with previous reports.<sup>[23]</sup>

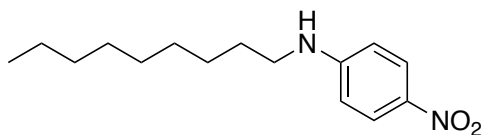

**4-Nitro-*N*-nonylaniline (3e):** Nonan-1-amine (**1e**, 0.018 mL, 0.1 mmol) was arylated with salt **2a** (0.048 g, 1.0 equiv) according to the general procedure in toluene (0.5 mL) for 4 h. Purified by column chromatography (pentane/EtOAc 100:0 to 19:1), to give **3e** (0.0221 g, 0.084 mmol, 84%) as a yellow solid,  $R_f = 0.2$  in 5% pentane/ethyl acetate.  $^1\text{H NMR}$  (400 MHz,  $\text{CDCl}_3$ )  $\delta$  8.10 – 8.06 (m, 2H), 6.53 – 6.49 (m, 2H), 4.45 (br. s, 1H), 3.20 (td,  $J = 7.1, 4.7$  Hz, 2H), 1.65 (app. p,  $J = 7.0$  Hz, 2H), 1.42 – 1.21 (m, 12H), 0.91 – 0.87 (m, 3H).  $^{13}\text{C NMR}$  (101 MHz,  $\text{CDCl}_3$ )  $\delta$  153.6, 138.1, 126.6, 111.1, 43.6, 32.0, 29.6, 29.5, 29.4, 29.3, 27.2, 22.8, 14.2. Mp = 50.7 – 51.2 °C. HRMS (ESI): calcd for  $\text{C}_{15}\text{H}_{24}\text{NaN}_2\text{O}_2$   $[\text{M}+\text{Na}]^+$ : 287.1730; found: 287.1731.

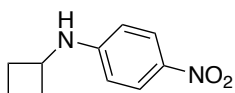

**4-Nitro-*N*-cyclobutylaniline (3f):** Cyclobutylamine (**1f**, 0.009 mL, 0.1 mmol) was arylated with salt **2a** (0.048 g, 1.0 equiv) according to the general procedure in toluene (0.5 mL) for 4 h. Purified by column chromatography (pentane/EtOAc 100:0 to 9:1), to give **3f** (0.0096 g, 0.05 mmol, 50%) as a yellow solid.  $R_f = 0.2$  in 5% pentane/ethyl acetate.  $^1\text{H NMR}$  (400 MHz,  $\text{CDCl}_3$ )  $\delta$  8.09 – 8.05 (m, 2H), 6.48 – 6.44 (m, 2H), 4.65 (br. s, 1H), 4.04 – 3.94 (m, 1H), 2.53 – 2.43 (m, 2H), 1.97 – 1.80 (m, 4H).  $^{13}\text{C NMR}$  (101 MHz,  $\text{CDCl}_3$ )  $\delta$  152.3, 138.3, 126.6, 111.4, 48.5, 31.0, 15.4. Mp = 53.6 – 53.9 °C. HRMS (ESI): calcd for  $\text{C}_{10}\text{H}_{12}\text{NaN}_2\text{O}_2$   $[\text{M}+\text{Na}]^+$ : 215.0796; found: 215.0793.

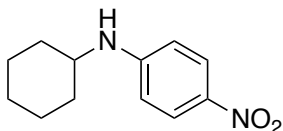

**4-Nitro-*N*-cyclohexylaniline (3g):** Cyclohexylamine (**1g**, 0.011 mL, 0.1 mmol) was arylated with salt **2a** (0.048 g, 1.0 equiv) according to the general procedure in toluene (0.5 mL) for 4 h. Purified by column chromatography (pentane/EtOAc 100:0 to 19:1), to give **3g** (0.0118 g, 0.054 mmol, 54%) as a yellow oil.  $R_f = 0.5$  in 10% pentane/ethyl acetate.  $^1\text{H NMR}$  (400 MHz,  $\text{CDCl}_3$ )  $\delta$  8.08 – 8.04 (m, 2H), 6.51 – 6.47 (m, 2H), 4.41 (br. s, 1H), 3.41 – 3.32 (m, 1H), 2.08 – 2.02 (m, 2H), 1.83 – 1.76 (m, 2H), 1.72 – 1.65 (m, 1H), 1.46 – 1.35 (m, 2H), 1.30 – 1.17 (m, 3H).  $^{13}\text{C NMR}$  (101 MHz,  $\text{CDCl}_3$ )  $\delta$  152.6, 137.8, 126.7, 111.3, 51.7, 33.1, 25.7, 24.9. The analytical data are consistent with previous reports.<sup>[21]</sup>

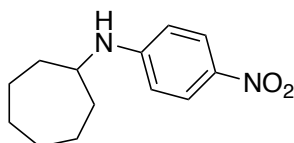

**4-Nitro-*N*-cycloheptylaniline (3h):** Cycloheptylamine (**1h**, 0.013 mL, 0.1 mmol) was arylated with salt **2a** (0.048 g, 1.0 equiv) according to the general procedure in toluene (0.5 mL) for 4 h. Purified by column chromatography (pentane/EtOAc 100:0 to 9:1), to give **3h** (0.016 g, 0.068 mmol, 68%) as a yellow oil.  $R_f = 0.3$  in 5% pentane/ethyl acetate.  $^1\text{H NMR}$  (400 MHz,  $\text{CDCl}_3$ )  $\delta$  8.09 – 8.05 (m, 2H), 6.47 – 6.43 (m, 2H), 4.46 (br. s, 1H), 3.59 – 3.51 (m, 1H), 2.04 – 1.99 (m, 2H), 1.75 – 1.47 (m, 10H).  $^{13}\text{C NMR}$  (101 MHz,  $\text{CDCl}_3$ )  $\delta$  152.4, 137.7, 126.7, 111.4, 53.8, 34.8, 28.3, 24.4. The analytical data are consistent with previous reports.<sup>[24]</sup>

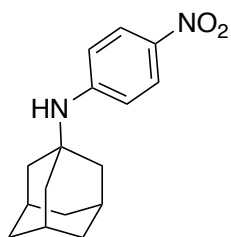

**4-Nitro-*N*-adamantylaniline (3i):** Adamantan-1-amine (**1i**, 0.015 g, 0.1 mmol) was arylated with salt **2a** (0.048 g, 1.0 equiv) according to the general procedure in toluene (0.5 mL) for 24 h. Purified by column chromatography (pentane/EtOAc 100:0 to 19:1), to give **3i** (0.0162 g, 0.0595 mmol, 60%) as a yellow solid.  $R_f = 0.2$  in 5% pentane/ethyl acetate.  $^1\text{H NMR}$  (400 MHz,  $\text{CDCl}_3$ )  $\delta$  8.04 – 8.00 (m, 2H), 6.65 – 6.61 (m, 2H), 4.36 (br. s, 1H), 2.17 (s, 3H), 2.00 (d,  $J = 2.9$  Hz, 6H), 1.78 – 1.69 (m, 6H).  $^{13}\text{C NMR}$  (101 MHz,  $\text{CDCl}_3$ )  $\delta$  152.3, 137.6, 126.2, 113.6, 52.7, 42.6, 36.4, 29.7. The analytical data are consistent with previous reports.<sup>[25]</sup>

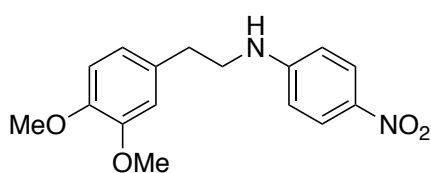

**4-Nitro-*N*-(3,4-dimethoxyphenethyl)aniline (3j):** 2-(3,4-Dimethoxyphenyl)ethan-1-amine (**1j**, 0.017 mL, 0.1 mmol) was arylated with salt **2a** (0.048 g, 1.0 equiv) according to the general procedure in toluene (0.5 mL) for 4 h. Purified by column chromatography (pentane/EtOAc 100:0 to 7:3), to give **3j** (0.0192 g, 0.064 mmol, 64%) as a yellow oil.  $R_f = 0.5$  in 30% pentane/ethyl acetate.  $^1\text{H NMR}$  (400 MHz,  $\text{CDCl}_3$ )  $\delta$  8.10 – 8.07 (m, 2H), 6.84 (d,  $J = 8.1$  Hz, 1H), 6.75 (dd,  $J = 8.1, 2.0$  Hz, 1H), 6.71 (d,  $J = 2.0$  Hz, 1H), 6.54 – 6.50 (m, 2H), 4.48 (br. s, 1H), 3.88 (s, 3H), 3.86 (s, 3H), 3.48 (app. p,  $J = 6.8$ , 2H), 2.90 (t,  $J = 6.9$  Hz, 2H).  $^{13}\text{C NMR}$  (101 MHz,  $\text{CDCl}_3$ )  $\delta$  153.2, 149.4, 148.2, 138.3, 130.7, 126.6, 120.8, 112.0, 111.7, 111.3, 56.1, 56.1, 44.6, 34.8. HRMS (ESI): calcd for  $\text{C}_{16}\text{H}_{18}\text{NaN}_2\text{O}_4$   $[\text{M}+\text{Na}]^+$ : 325.1159; found: 325.1153.

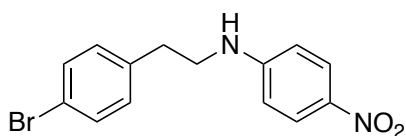

**4-Nitro-*N*-(4-bromophenethyl)aniline (3k):** 2-(4-Bromophenyl)ethan-1-amine (**1k**, 0.016 mL, 0.1 mmol) was arylated with salt **2a** (0.048 g, 1.0 equiv) according to the general procedure in toluene (0.5 mL) for 4 h. Purified by column chromatography (pentane/EtOAc 100:0 to 8:2), to give **3k** (0.0178 g, 0.055 mmol, 55%) as a yellow solid.  $R_f = 0.04$  in 10% pentane/ethyl acetate.  $^1\text{H NMR}$  (400 MHz,  $\text{CDCl}_3$ )  $\delta$  8.10 – 8.07 (m, 2H), 7.47 – 7.44 (m, 2H), 7.10 – 7.08 (m, 2H), 6.54 – 6.41 (m, 2H), 4.48 (br. s, 1H), 3.49 (q,  $J = 6.5$  Hz, 2H), 2.91 (t,  $J = 6.9$  Hz, 2H).  $^{13}\text{C NMR}$  (101 MHz,  $\text{CDCl}_3$ )  $\delta$  153.0, 138.5, 137.3, 132.1, 130.6, 126.6, 120.9, 111.3, 44.3, 34.7. Mp = 97.2 – 98.4 °C. HRMS (ESI): calcd for  $\text{C}_{14}\text{H}_{13}\text{BrNaN}_2\text{O}_2$   $[\text{M}+\text{Na}]^+$ : 343.0058; found: 343.0049.

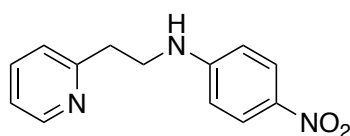

**4-Nitro-*N*-(2-(pyridin-2-yl)ethyl)aniline (3l):** 2-(Pyridin-2-yl)ethan-1-amine (**1l**, 0.012 mL, 0.1 mmol) was arylated with salt **2a** (0.048 g, 1.0 equiv) according to the general procedure in toluene (0.5 mL) for 4 h. Purified by column chromatography (pentane/EtOAc 100:0 to 2:3), to give **3l** (0.0176 g, 0.072 mmol, 72%) as a yellow solid.  $R_f = 0.1$  in 50% pentane/ethyl acetate.  $^1\text{H NMR}$  (400 MHz,  $\text{CDCl}_3$ )  $\delta$  8.58 – 8.56 (m, 1H), 8.09 – 8.05 (m, 2H), 7.65 (td,  $J = 7.7, 1.8$  Hz, 1H), 7.22 – 7.19 (m, 2H), 6.56 – 6.52 (m, 2H), 5.48 (br. s, 1H), 3.62 (t,  $J = 6.4$  Hz, 2H), 3.12 (t,  $J = 6.4$  Hz, 2H).  $^{13}\text{C NMR}$  (101 MHz,  $\text{CDCl}_3$ )  $\delta$  159.1, 153.4, 149.5, 138.0,

137.0, 126.6, 123.6, 122.0, 111.2, 42.9, 36.7. Mp = 132.2 – 132.9 °C. HRMS (ESI): calcd for C<sub>13</sub>H<sub>13</sub>NaN<sub>3</sub>O<sub>2</sub> [M+Na]<sup>+</sup>: 266.0905; found: 266.0906.

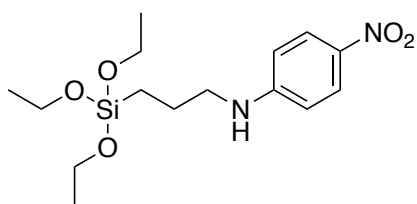

**4-Nitro-N-(3-(triethoxysilyl)propyl)aniline (3m)**: 3-(Triethoxysilyl)propan-1-amine (**1m**, 0.023 mL, 0.1 mmol) was arylated with salt **2a** (0.048 mg, 1.0 equiv) according to the general procedure in toluene (0.5 mL) for 4 h. Purified by column chromatography (pentane/EtOAc 100:0 to 9:1), to give **3m** (0.0139 g, 0.041 mmol, 41%) as a yellow oil. R<sub>f</sub> = 0.2 in 10% pentane/ethyl acetate. <sup>1</sup>H NMR (400 MHz, CDCl<sub>3</sub>) δ 8.09 – 8.06 (m, 2H), 6.53 – 6.49 (m, 2H), 4.80 (br. s, 1H), 3.84 (q, *J* = 7.0 Hz, 6H), 3.23 (app. q, *J* = 7.2 Hz, 2H), 1.80 (app. p, *J* = 7.2 Hz, 2H), 1.23 (t, *J* = 7.0 Hz, 9H), 0.73 – 0.69 (m, 2H). <sup>13</sup>C NMR (101 MHz, CDCl<sub>3</sub>) δ 153.6, 137.9, 126.6, 111.0, 58.7, 45.7, 22.5, 18.5, 7.9. HRMS (ESI): calcd for C<sub>15</sub>H<sub>26</sub>NaN<sub>2</sub>O<sub>5</sub>Si [M+Na]<sup>+</sup>: 365.1503; found: 365.1498. The analytical data are consistent with previous reports.<sup>[26]</sup>

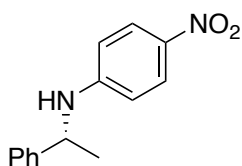

**(R)-4-Nitro-N-(1-phenylethyl)aniline (3n)**. (*R*)-1-phenylethan-1-amine (**1n**, 0.05 mL, 0.4 mmol) was arylated with salt **2a** (0.19 g, 1.0 equiv) according to the general procedure in toluene (2 mL) for 22 h. Purified by column chromatography (pentane/EtOAc 100:5 to 10:4), to give **3n** (0.0482 g, 0.02 mmol, 51%) as a yellow oil. R<sub>f</sub> = 0.12 in 5% pentane/ethyl acetate. <sup>1</sup>H NMR (400 MHz, CDCl<sub>3</sub>) δ 8.00 (d, *J* = 9.2 Hz, 2H), 7.39 – 7.30 (m, 4H), 7.29 – 7.25 (m, 1H), 6.46 (d, *J* = 9.2 Hz, 2H), 4.91 (br. s, 1H), 4.60 (p, *J* = 6.6 Hz, 1H), 1.59 (d, *J* = 6.7 Hz, 3H). <sup>13</sup>C NMR (101 MHz, CDCl<sub>3</sub>) δ 152.4, 143.4, 138.4, 129.1, 127.7, 126.4, 125.8, 112.0, 53.5, 24.7. The analytical data are consistent with previous reports.<sup>[27]</sup>  
HPLC-analysis of *ee*: Chiralpak IA, n-hexane/*i*-PrOH 95/5, 1 mL/min, 28.7°C, 245 nm, t<sub>R</sub> = (*R*): 20.6 min, (*S*): 23.2 min showed that the *ee* remained >99%, i.e. no erosion of the *ee* was observed.

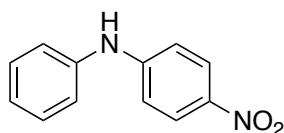

**4-Nitro-N-phenylaniline (3o)**: Aniline (**1o**, 0.09 mL, 0.1 mmol) was arylated with salt **2a** (0.048 g, 1.0 equiv) according to the general procedure in toluene (0.5 mL) for 4 h. Purified by column chromatography (toluene/EtOAc 100:10), to give **3o** (0.019 g, 0.092 mmol, 91%) as a yellow oil. R<sub>f</sub> = 0.74 in 10% toluene/ethyl acetate. <sup>1</sup>H NMR (400 MHz, CDCl<sub>3</sub>) δ 8.14 – 8.10 (m, 2H), 7.41 – 7.37 (m, 2H), 7.24 – 7.14 (m, 3H), 6.96 – 6.92 (m, 2H), 6.33 (br. s, 1H). <sup>13</sup>C NMR (101 MHz, CDCl<sub>3</sub>) δ 150.3, 139.9, 139.6, 129.9, 126.4, 124.8, 122.1, 113.8. Mp = 131.2–134.3 °C. HRMS (ESI): calcd for C<sub>12</sub>H<sub>12</sub>NaN<sub>2</sub>O<sub>2</sub> [M+Na]<sup>+</sup>: 237.0634; found: 237.0639. The analytical data are consistent with previous reports.<sup>[28]</sup>

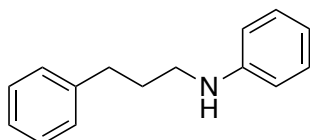

**N-(3-Phenylpropyl)aniline (3p)**: 3-Phenylpropyl-1-amine (**1a**, 0.014 mL, 0.1 mmol) was arylated with salt **2h** (0.043 g, 1.0 equiv) according to the general procedure in toluene (0.5 mL) for 22 h. Purified by column chromatography (pentane/EtOAc 100:0 to 100:1), to give **3p** (0.0109 g, 0.052 mmol, 52%) as a colorless oil. R<sub>f</sub> = 0.3 in 2% pentane/ethyl acetate. <sup>1</sup>H NMR (400 MHz, CDCl<sub>3</sub>) δ 7.33 – 7.29 (m, 2H), 7.23 – 7.14 (m, 5H), 6.72 (tt, *J* = 7.3, 1.1 Hz, 1H), 6.60 – 6.57 (m, 2H), 3.65 (br. s, 1H), 3.18 (t, *J* = 7.0 Hz, 2H), 2.74 (app. t,

$J = 7.6$  Hz, 2H), 2.00 – 1.92 (m, 2H).  $^{13}\text{C}$  NMR (101 MHz,  $\text{CDCl}_3$ )  $\delta$  148.4, 141.8, 129.4, 128.6, 128.5, 126.1, 117.4, 112.9, 43.6, 33.5, 31.2. The analytical data are consistent with previous reports.<sup>[29]</sup>

When the reaction was performed with **1a** (1.5 equiv) or (2.0 equiv), the isolated yield of **3p** was 66% and 74%, respectively. This can be rationalized by diminished formation of diarylated product **3p'** (see Section 3.3.), also leading to an easier purification.

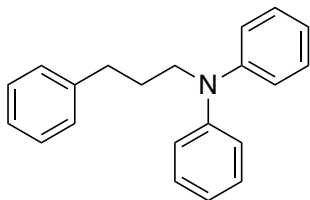

**N-Phenyl-N-(3-phenylpropyl)aniline (3p')**: The diarylated product **3p'** was isolated as a colorless oil (0.0023 g, 0.008 mmol, 8%) as a byproduct in the synthesis of **3p** (see above).  $R_f = 0.4$  in 2% pentane/ethyl acetate.  $^1\text{H}$  NMR (400 MHz,  $\text{CDCl}_3$ )  $\delta$  7.29 – 7.22 (m, 6H), 7.20 – 7.14 (m, 3H), 6.97 – 6.90 (m, 6H), 3.73 (app. t,  $J = 7.6$ , 2H), 2.66 (t,  $J = 7.8$ , 2H), 2.04 – 1.96 (m, 2H).  $^{13}\text{C}$  NMR (101 MHz,  $\text{CDCl}_3$ )  $\delta$  148.1, 141.8, 129.4, 128.5, 128.5, 126.0, 121.3, 121.1, 51.8, 33.4, 29.2. HRMS (ESI): calcd for  $\text{C}_{21}\text{H}_{22}\text{N}$   $[\text{M}+\text{H}]^+$ : 288.1747; found: 288.1749.

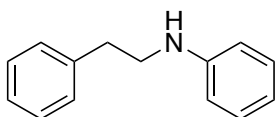

**N-(2-Phenethyl)aniline (3q)**: 2-Phenylethan-1-amine (**1b**, 0.019 mL, 0.15 mmol) was arylated with salt **2h** (0.043 g, 1.0 equiv) according to the general procedure in toluene (0.5 mL) for 22 h. Purified by column chromatography (pentane/EtOAc 100:0 to 100:1), to give **3q** (0.0161 g, 0.082 mmol, 82%) as a colorless oil.  $R_f = 0.8$  in 5% pentane/ethyl acetate.  $^1\text{H}$  NMR (400 MHz,  $\text{CDCl}_3$ )  $\delta$  7.35 – 7.31 (m, 2H), 7.27 – 7.23 (m, 3H), 7.21 – 7.17 (m, 2H), 6.74 – 6.70 (m, 1H), 6.64 – 6.62 (m, 2H), 3.68 (br. s, 1H), 3.42 (t,  $J = 7.0$  Hz, 2H), 2.93 (t,  $J = 7.0$  Hz, 2H).  $^{13}\text{C}$  NMR (101 MHz,  $\text{CDCl}_3$ )  $\delta$  148.2, 139.5, 129.4, 128.9, 128.7, 126.6, 117.6, 113.2, 45.2, 35.7. The analytical data are consistent with previous reports.<sup>[30]</sup>

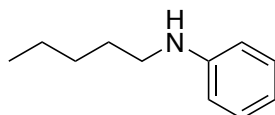

**N-Pentylaniline (3r)**: Pentan-1-amine (**1c**, 0.012 mL, 0.1 mmol) was arylated with salt **2h** (0.043 g, 1.0 equiv) according to the general procedure in toluene (0.5 mL) for 22 h. Purified by column chromatography (pentane/EtOAc 100:0 to 100:1), to give **3r** (0.0061 g, 0.037 mmol, 37%) as a colorless oil.  $R_f = 0.5$  in 5% pentane/ethyl acetate.  $^1\text{H}$  NMR (400 MHz,  $\text{CDCl}_3$ )  $\delta$  7.19 – 7.15 (m, 2H), 6.69 (app. t,  $J = 7.3$  Hz, 1H), 6.61 (app. d,  $J = 7.3$  Hz, 2H), 3.59 (br. s, 1H), 3.11 (t,  $J = 7.1$  Hz, 2H), 1.63 (app. p,  $J = 7.3$  Hz, 2H), 1.41 – 1.36 (m, 4H), 0.97 – 0.90 (m, 3H).  $^{13}\text{C}$  NMR (101 MHz,  $\text{CDCl}_3$ )  $\delta$  148.7, 129.4, 117.2, 112.8, 44.1, 29.5, 29.4, 22.7, 14.2. The analytical data are consistent with previous reports.<sup>[31]</sup>

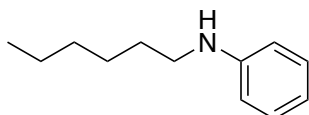

**N-Hexylaniline (3s)**: Hexan-1-amine (**1d**, 0.020 mL, 0.15 mmol) was arylated with salt **2h** (0.043 g, 1.0 equiv) according to the general procedure in toluene (0.5 mL) for 22 h. Purified by column chromatography (pentane/EtOAc 100:0 to 100:1), to give **3s** (0.0076 g, 0.043 mmol, 43%) as a colorless oil.  $R_f = 0.5$  in 5% pentane/ethyl acetate.  $^1\text{H}$  NMR (400 MHz,  $\text{CDCl}_3$ )  $\delta$  7.20 – 7.15 (m, 2H), 6.71 – 6.67 (m, 1H), 6.63 – 6.59 (m, 2H), 3.59 (br. s, 1H), 3.11 (t,  $J = 7.1$  Hz, 2H), 1.62 (app. p,  $J = 7.1$  Hz, 2H), 1.44 – 1.29 (m, 6H), 0.92 – 0.89 (m, 3H).  $^{13}\text{C}$  NMR (101 MHz,  $\text{CDCl}_3$ )  $\delta$  148.7, 129.4, 117.2, 112.8, 44.2, 31.8, 29.7, 27.0, 22.8, 14.2. The analytical data are consistent with previous reports.<sup>[32]</sup>

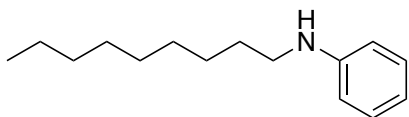

**N-Nonylaniline (3t):** Nonan-1-amine (**1e**, 0.027 mL, 0.015 mmol) was arylated with salt **2h** (0.043 g, 1.0 equiv) according to the general procedure in toluene (0.5 mL) for 22 h. Purified by column chromatography (pentane/EtOAc 100:0 to 100:1), to give **3t** (0.0134 g, 0.061 mmol, 61%) as a colorless oil.  $R_f = 0.8$  in 5% pentane/ethyl acetate.  $^1\text{H NMR}$  (400 MHz,  $\text{CDCl}_3$ )  $\delta$  7.21 – 7.15 (m, 2H), 6.69 (tt,  $J = 7.3, 1.1$  Hz, 1H), 6.63 – 6.58 (m, 2H), 3.59 (br. s, 1H), 3.10 (t,  $J = 7.1$  Hz, 2H), 1.62 (app. p,  $J = 7.0$  Hz, 2H), 1.40 – 1.25 (m, 12H), 0.91 – 0.87 (m, 3H).  $^{13}\text{C NMR}$  (101 MHz,  $\text{CDCl}_3$ )  $\delta$  148.7, 129.4, 117.2, 112.9, 44.2, 32.0, 29.8, 29.7, 29.6, 29.4, 27.4, 22.8, 14.2. The analytical data are consistent with previous reports.<sup>[33]</sup>

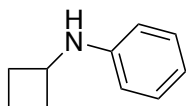

**N-Cyclobutylaniline (3u):** Cyclobutylamine (**1f**, 0.013 mL, 0.15 mmol) was arylated with salt **2h** (0.043 g, 1.0 equiv) according to the general procedure in toluene (0.5 mL) for 22 h. Purified by column chromatography (pentane/EtOAc 100:0 to 100:1), to give **3u** (0.006 g, 0.041 mmol, 41%) as a colorless oil.  $R_f = 0.2$  in 1% pentane/ethyl acetate.  $^1\text{H NMR}$  (400 MHz,  $\text{CDCl}_3$ )  $\delta$  7.20 – 7.12 (m, 2H), 6.69 (tt,  $J = 7.3, 1.1$  Hz, 1H), 6.57 – 6.54 (m, 2H), 3.96 – 3.88 (m, 1H), 3.81 (br. s, 1H), 2.46 – 2.36 (m, 2H), 1.90 – 1.73 (m, 4H).  $^{13}\text{C NMR}$  (101 MHz,  $\text{CDCl}_3$ )  $\delta$  147.2, 129.4, 117.6, 113.2, 49.3, 31.4, 15.4. The analytical data are consistent with previous reports.<sup>[34]</sup>

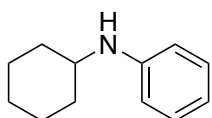

**N-Cyclohexylaniline (3v):** Cyclohexylamine (**1g**, 0.011 mL, 0.1 mmol) was arylated with salt **2h** (0.043 g, 1.0 equiv) according to the general procedure in toluene (0.5 mL) for 22 h. Purified by column chromatography (pentane/EtOAc 100:0 to 100:1), to give **3v** (0.0104 g, 0.059 mmol, 59%) as a colorless oil.  $R_f = 0.6$  in 5% pentane/ethyl acetate.  $^1\text{H NMR}$  (400 MHz,  $\text{CDCl}_3$ )  $\delta$  7.19 – 7.11 (m, 2H), 6.67 – 6.63 (m, 1H), 6.60 – 6.56 (m, 2H), 3.52 (br. s, 1H), 3.29 – 3.22 (m, 1H), 2.09 – 2.03 (m, 2H), 1.79 – 1.73 (m, 2H), 1.68 – 1.63 (m, 1H), 1.43 – 1.32 (m, 2H), 1.29 – 1.08 (m, 3H).  $^{13}\text{C NMR}$  (101 MHz,  $\text{CDCl}_3$ )  $\delta$  147.6, 129.4, 117.0, 113.3, 51.9, 33.7, 26.1, 25.2. The analytical data are consistent with previous reports.<sup>[35]</sup>

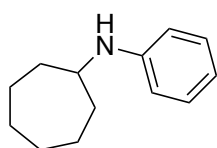

**N-Phenylcycloheptanamine (3w):** Cycloheptylamine (**1h**, 0.019 mL, 0.015 mmol) was arylated with salt **2h** (0.043 g, 1.0 equiv) according to the general procedure in toluene (0.5 mL) for 22 h. Purified by column chromatography (pentane/EtOAc 100:0 to 100:1), to give **3w** (0.0110 g, 0.058 mmol, 58%) as a colorless oil.  $R_f = 0.2$  in 1% pentane/ethyl acetate.  $^1\text{H NMR}$  (400 MHz,  $\text{CDCl}_3$ )  $\delta$  7.19 – 7.14 (m, 2H), 6.68 – 6.64 (m, 1H), 6.58 – 6.53 (m, 2H), 3.57 (br. s, 1H), 3.49 – 3.43 (m, 1H), 2.06 – 1.98 (m, 2H), 1.71 – 1.44 (m, 11H).  $^{13}\text{C NMR}$  (101 MHz,  $\text{CDCl}_3$ )  $\delta$  147.5, 129.4, 116.9, 113.4, 53.8, 35.1, 28.5, 24.6. The analytical data are consistent with previous reports.<sup>[36]</sup>

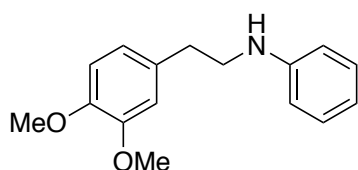

**N-(3,4-Dimethoxyphenethyl)aniline (3x):** 2-(3,4-Dimethoxyphenyl)ethan-1-amine (**1j**, 0.019 mL, 0.11 mmol) was arylated with salt **2h** (0.043 g, 1.0 equiv) according to the general procedure in toluene (0.5 mL) for 22 h. Purified by column chromatography (pentane/EtOAc 100:0 to 9:1), to give **3x** (0.0219 g, 0.085

mmol, 85%) as a colorless oil.  $R_f = 0.05$  in 2% pentane/ethyl acetate.  $^1\text{H NMR}$  (400 MHz,  $\text{CDCl}_3$ )  $\delta$  7.21 – 7.16 (m, 2H), 6.83 (d,  $J = 8.1$  Hz, 1H), 6.77 (dd,  $J = 8.1, 2.0$  Hz, 1H), 6.74 – 6.68 (m, 2H), 6.65 – 6.60 (m, 2H), 3.87 (s, 3H), 3.86 (s, 3H), 3.39 (t,  $J = 6.9$  Hz, 2H), 2.87 (t,  $J = 6.9$  Hz, 2H).  $^{13}\text{C NMR}$  (101 MHz,  $\text{CDCl}_3$ )  $\delta$  149.2, 148.2, 147.9, 132.0, 129.4, 120.9, 117.7, 113.2, 112.3, 111.7, 56.1, 56.0, 45.3, 35.2. The analytical data are consistent with previous reports.<sup>[37]</sup>

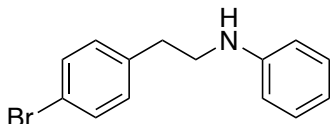

***N*-(4-Bromophenethyl)aniline (3y)**: 2-(4-Bromophenyl)ethan-1-amine (**1k**, 0.023 mL, 0.15 mmol) was arylated with salt **2h** (0.043 g, 1.0 equiv) according to the general procedure in toluene (0.5 mL) for 22 h. Purified by column chromatography (pentane/EtOAc 100:0 to 100:4), to give **3y** (0.0138 g, 0.050 mmol, 50%) as a yellow solid.  $R_f = 0.4$  in 5% pentane/ethyl acetate.  $^1\text{H NMR}$  (400 MHz,  $\text{CDCl}_3$ )  $\delta$  7.46 – 7.42 (m, 2H), 7.22 – 7.17 (m, 2H), 7.12 – 7.09 (m, 2H), 6.75 – 6.70 (m, 1H), 6.63 – 6.60 (m, 2H), 3.65 (br. s, 1H), 3.39 (t,  $J = 7.0$  Hz, 2H), 2.88 (t,  $J = 7.0$  Hz, 2H).  $^{13}\text{C NMR}$  (101 MHz,  $\text{CDCl}_3$ )  $\delta$  147.9, 138.4, 131.8, 130.7, 129.5, 120.4, 117.8, 113.1, 45.0, 35.1. The analytical data are consistent with previous reports.<sup>[38]</sup>

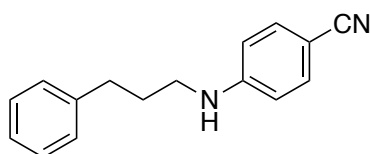

**4-Cyano- *N*-(3-phenylpropyl)aniline (3z)**: 3-Phenylpropan-1-amine (**1a**, 0.014 mL, 0.1 mmol) was arylated with salt **2i** (0.046 g, 1.0 equiv) according to the general procedure in toluene (0.5 mL) for 4 h. Purified by column chromatography (toluene/EtOAc 100:0 to 100:2), to give **3z** (0.019 g, 0.080 mmol, 80 %) as a beige solid.  $R_f = 0.17$  in toluene.  $^1\text{H NMR}$  (400 MHz,  $\text{CD}_3\text{OD}$ )  $\delta$  7.38 – 7.31 (m, 2H), 7.27 – 7.23 (m, 2H), 7.19 – 7.13 (m, 3H), 6.59 – 6.51 (m, 2H), 3.08 (app. t,  $J = 7.2$  Hz, 2H), 2.68 (app. t,  $J = 7.5$  Hz, 2H), 1.88 (app. p,  $J = 7.5$  Hz, 2H).  $^{13}\text{C NMR}$  (101 MHz,  $\text{CD}_3\text{OD}$ )  $\delta$  154.0, 143.0, 134.6, 129.5, 129.4, 126.9, 121.8, 112.8, 97.26, 43.0, 34.2, 31.8. Mp = 76.5 – 80.8 °C. HRMS (ESI): calcd for  $\text{C}_{16}\text{H}_{16}\text{N}_2\text{Na}$   $[\text{M}+\text{Na}]^+$ : 259.1206; found: 259.1206.

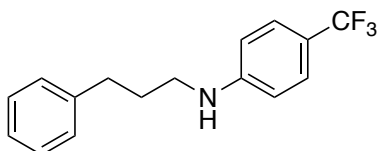

**4-(trifluoromethyl)-*N*-(3-phenylpropyl)aniline (3aa)**: 3-Phenylpropan-1-amine (**1a**, 0.014 mL, 0.1 mmol) was arylated with salt **2j** (0.053 g, 1.0 equiv) according to the general procedure in toluene (0.5 mL) for 4 h. Purified by column chromatography (pentane/EtOAc 100:0 to 100:5), to give **3aa** (0.0228 g, 0.081 mmol, 81%) as a pale yellow oil.  $R_f = 0.5$  in 5% pentane/ethyl acetate.  $^1\text{H NMR}$  (400 MHz,  $\text{CDCl}_3$ )  $\delta$  7.39 (d,  $J = 8.4$  Hz, 2H), 7.33 – 7.29 (m, 2H), 7.24 – 7.17 (m, 3H), 6.55 (d,  $J = 8.4$  Hz, 2H), 3.94 (br. s, 1H), 3.18 (t,  $J = 7.0$  Hz, 2H), 2.75 (t,  $J = 7.5$  Hz, 2H), 1.97 (app. p, 2H  $J = 7.2$  Hz).  $^{13}\text{C NMR}$  (101 MHz,  $\text{CDCl}_3$ )  $\delta$  150.8, 141.4, 128.7, 126.8, 126.7 (q,  $^3J_{\text{F-C}} = 3.8$  Hz), 125.2 (q,  $^1J_{\text{F-C}} = 270.1$  Hz), 118.7 (q,  $^2J_{\text{F-C}} = 32.6$  Hz), 111.9, 77.4, 77.2, 76.8, 43.0, 33.4, 30.9.  $^{19}\text{F NMR}$  (377 MHz,  $\text{CDCl}_3$ )  $\delta$  -61.0. HRMS (ESI): calcd for  $\text{C}_{16}\text{H}_{17}\text{F}_3\text{N}$   $[\text{M}+\text{H}]^+$ : 280.1308; found: 280.1309.

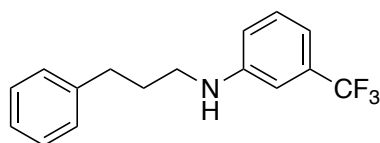

**3-(trifluoromethyl)-*N*-(3-phenylpropyl)aniline (3ab)**: 3-Phenylpropan-1-amine (**1a**, 0.06 mL, 0.4 mmol) was arylated with salt **2k** (0.20 g, 1.0 equiv) according to the general procedure in toluene (2 mL) for 4 h. Purified by column chromatography (pentane/EtOAc 100:0 to 100:1), to give **3ab** (0.0498 g, 0.18 mmol, 45%) as a pale yellow oil.  $R_f = 0.48$  in 5% pentane/ethyl acetate.  $^1\text{H NMR}$  (400 MHz,  $\text{CDCl}_3$ )  $\delta$  7.34 – 7.30



(m, 2H), 7.24 – 7.21 (m, 4H), 6.93 (app. d,  $J = 7.6$  Hz, 1H), 6.76 (s, 1H), 6.70 (app. d,  $J = 8.2$ , Hz, 1H), 3.61 (br. s, 1H) 3.18 (t,  $J = 7.0$  Hz, 2H), 2.76 (t,  $J = 7.4$  Hz, 2H), 1.98 (p,  $J = 7.4$  Hz, 2H).  $^{13}\text{C}$  NMR (101 MHz,  $\text{CDCl}_3$ )  $\delta$  148.5, 141.5, 131.7 (q,  $^2J_{\text{F-C}} = 31.7$  Hz), 129.7, 128.7, 128.5, 126.2, 124.5 (q,  $^1J_{\text{F-C}} = 272.5$  Hz), 115.8, 113.7 (q,  $^3J_{\text{F-C}} = 3.9$  Hz), 108.9 (q,  $^3J_{\text{F-C}} = 3.8$  Hz), 43.3, 33.5, 30.9.  $^{19}\text{F}$  NMR (377 MHz,  $\text{CDCl}_3$ )  $\delta$  -62.9. HRMS (ESI): calcd for  $\text{C}_{16}\text{H}_{17}\text{F}_3\text{N}$   $[\text{M}+\text{H}]^+$ : 280.1308; found: 280.1310.

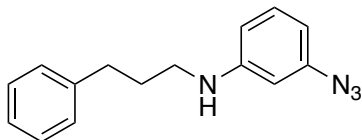

**3-Azido-*N*-(3-phenylpropyl)aniline (3ac):** 3-Phenylpropan-1-amine (**1a**, 0.014 mL, 0.1 mmol) was arylated with salt **2l** (0.052 g, 1.0 equiv) according to the general procedure in toluene (0.5 mL) for 4 h. Purified by column chromatography (pentane/EtOAc 100:0 to 100:5), to give **3ac** (0.0101 g, 0.040 mmol, 40%) as a yellow oil.  $R_f = 0.75$  in 5% pentane/ethyl acetate.  $^1\text{H}$  NMR (400 MHz,  $\text{CDCl}_3$ )  $\delta$  7.35 – 7.27 (m, 2H), 7.24 – 7.19 (m, 4H), 7.11 (t,  $J = 8.0$  Hz, 1H), 6.39 – 6.33 (m, 2H), 6.18 (app. t,  $J = 2.2$  Hz, 1H), 3.71 (br. s, 1H), 3.14 (t,  $J = 7.0$  Hz, 2H), 2.74 (t,  $J = 7.1$  Hz, 2H), (app. p, 2H  $J = 7.1$  Hz).  $^{13}\text{C}$  NMR (101 MHz,  $\text{CDCl}_3$ )  $\delta$  149.8, 141.6, 141.2, 130.5, 128.6, 128.5, 126.2, 109.9, 107.7, 102.9, 43.4, 33.5, 31.0. HRMS (ESI): calcd for  $\text{C}_{15}\text{H}_{17}\text{N}_4$   $[\text{M}+\text{H}]^+$ : 253.1448; found: 253.1448.

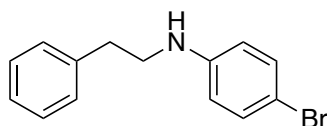

**4-Bromo-*N*-phenethylamine (3ad):** 2-Phenylethan-1-amine (**1b**, 0.013 mL, 0.1 mmol) was arylated with salt **2m** (0.059 g, 1.0 equiv) according to the general procedure in toluene (0.5 mL) for 4 h. Purified by column chromatography (pentane/diethyl ether 100:0 to 100:2), to give **3ad** (0.0202 g, 0.073 mmol, 73%) as a colorless oil.  $R_f = 0.3$  in 5% pentane/diethyl ether.  $^1\text{H}$  NMR (400 MHz,  $\text{CDCl}_3$ )  $\delta$  7.34 – 7.27 (m, 2H), 7.26 – 7.18 (m, 5H), 6.50 – 6.46 (m, 2H), 3.69 (br. s, 1H), 3.37 (t,  $J = 7.0$  Hz, 2H), 2.91 (t,  $J = 7.0$  Hz, 2H).  $^{13}\text{C}$  NMR (101 MHz,  $\text{CDCl}_3$ )  $\delta$  147.1, 139.1, 132.1, 128.9, 128.8, 126.7, 114.7, 109.1, 45.1, 35.5. HRMS (ESI): calcd for  $\text{C}_{14}\text{H}_{15}\text{BrN}$   $[\text{M}+\text{H}]^+$ : 276.0382; found: 276.0379.

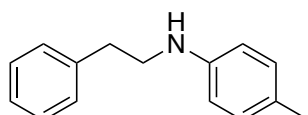

**4-Methyl-*N*-phenethylamine (3ae):** 2-Phenylethan-1-amine (**1b**, 0.013 mL, 0.1 mmol) was arylated with salt **2n** (0.046 g, 1.0 equiv) according to the general procedure in toluene (0.5 mL) for 4 h. Purified by column chromatography (pentane/diethyl ether 100:0 to 100:2), to give **3ae** (0.0194 g, 0.092 mmol, 92%) as a colorless oil.  $R_f = 0.3$  in 5% pentane/diethyl ether.  $^1\text{H}$  NMR (400 MHz,  $\text{CDCl}_3$ )  $\delta$  7.36 – 7.29 (m, 2H), 7.28 – 7.24 (m, 3H), 7.01 (d,  $J = 8.1$  Hz, 2H), 6.59 – 6.53 (m, 2H), 3.55 (br. s, 1H), 3.40 (t,  $J = 7.0$  Hz, 2H), 2.92 (t,  $J = 7.0$  Hz, 2H), 2.75 (s, 3H).  $^{13}\text{C}$  NMR (101 MHz,  $\text{CDCl}_3$ )  $\delta$  145.9, 139.6, 129.9, 128.9, 128.7, 126.9, 126.5, 113.4, 45.6, 35.7, 20.5. The analytical data are consistent with previous reports.<sup>[39]</sup>

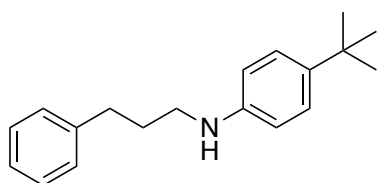

**4-(*tert*-Butyl)-*N*-(3-phenylpropyl)aniline (3af):** 3-Phenylpropyl-1-amine (**1a**, 0.014 mL, 0.1 mmol) was arylated with salt **2o** (0.054 g, 1.0 equiv) according to the general procedure in toluene (0.5 mL) for 24 h. Purified by column chromatography (pentane/EtOAc 100:0 to 100:1), to give **3af** (0.0111 g, 0.042 mmol, 42%) as a colorless oil,  $R_f = 0.3$  in 2% pentane/ethyl acetate.  $^1\text{H}$  NMR (400 MHz,  $\text{CDCl}_3$ )  $\delta$  7.32 – 7.28 (m, 2H), 7.24 – 7.17 (m, 5H), 6.58 – 6.53 (m, 2H), 3.58 (br. s, 1H), 3.14 (t,  $J = 7.0$  Hz, 2H), 2.74 (app. t,  $J = 7.6$  Hz, 2H), 1.95 (app. p,  $J = 7.6$  Hz, 2H), 1.28 (s, 9H).  $^{13}\text{C}$  NMR (101 MHz,  $\text{CDCl}_3$ )  $\delta$  146.1, 141.9, 140.2,

134.4, 128.6, 126.1, 126.1, 112.6, 43.8, 34.0, 33.6, 31.7, 31.3. HRMS (ESI): calcd for C<sub>19</sub>H<sub>26</sub>N [M+H]<sup>+</sup>: 268.2060; found: 268.2065. The analytical data are consistent with previous reports.<sup>[40]</sup>

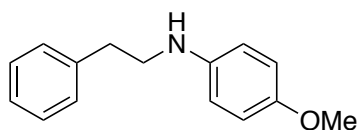

**4-Methoxy-N-phenethylamine (3ag):** 2-Phenylethan-1-amine (**1b**, 0.013 mL, 0.1 mmol) was arylated with salt **2p** (0.049 g, 1.0 equiv) according to the general procedure in toluene (0.5 mL) for 4 h. Purified by column chromatography (pentane/diethyl ether 100:0 to 9:1), to give **3ag** (0.0103 g, 0.045 mmol, 45%) as a colorless oil. R<sub>f</sub> = 0.3 in 10% pentane/diethyl ether. <sup>1</sup>H NMR (400 MHz, CDCl<sub>3</sub>) δ 7.35 – 7.33 (m, 2H), 7.26 – 7.20 (m, 3H), 6.82 – 6.77 (m, 2H), 6.62 – 6.58 (m, 2H), 3.76 (s, 3H), 3.45 (br. s, 1H), 3.37 (t, *J* = 7.0 Hz, 2H), 2.91 (t, *J* = 7.0 Hz, 2H). <sup>13</sup>C NMR (101 MHz, CDCl<sub>3</sub>) δ 152.4, 142.4, 139.5, 128.9, 128.7, 126.5, 115.1, 114.5, 56.0, 46.2, 35.8. The analytical data are consistent with previous reports.<sup>[41]</sup>

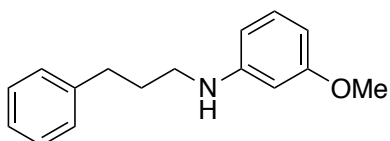

**3-Methoxy-N-(3-phenylpropyl)aniline (3ah):** 3-Phenylpropan-1-amine (**1a**, 0.014 mL, 0.1 mmol) was arylated with salt **2q** (0.052 g, 1.0 equiv) according to the general procedure in toluene (0.5 mL) for 4 h. Purified by column chromatography (pentane/EtOAc 100:0 to 100:3), to give **3ah** (0.0160 g, 0.066 mmol, 66%) as a yellow oil. R<sub>f</sub> = 0.46 in 5% pentane/ethyl acetate. <sup>1</sup>H NMR (400 MHz, CDCl<sub>3</sub>) δ 7.33 – 7.28 (m, 2H), 7.24–7.20 (m, 3H), 7.08 (t, *J* = 8.1 Hz, 1H), 6.27 (ddd, *J* = 8.0, 2.4, 0.8 Hz, 1H), 6.21 (ddd, *J* = 8.0, 2.4, 0.8 Hz, 1H), 6.14 (app. t, *J* = 2.3 Hz, 1H), 3.77 (s, 3H), 3.65 (br. s, 1H), 3.15 (t, *J* = 7.2 Hz, 2H), 2.74 (t, *J* = 7.2 Hz, 2H), 1.97 (app. p, 2H *J* = 7.2 Hz). <sup>13</sup>C NMR (101 MHz, CDCl<sub>3</sub>) δ 161.0, 149.9, 141.8, 130.1, 128.6, 128.5, 126.1, 106.1, 102.4, 98.8, 55.2, 43.5, 33.5, 31.2. HRMS (ESI): calcd for C<sub>16</sub>H<sub>20</sub>NO [M+H]<sup>+</sup>: 242.1539; found: 242.1539. The analytical data are consistent with previous reports.<sup>[42]</sup>

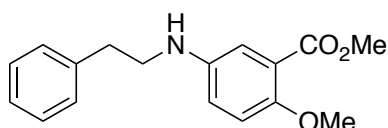

**Methyl-2-methoxy-5-(phenethylamino)benzoate (3ai):** 2-Phenylethan-1-amine (**1b**, 0.013 mL, 0.1 mmol) was arylated with salt **2r** (0.061 g, 1.0 equiv) according to the general procedure in toluene (0.5 mL) for 4 h. Purified by column chromatography (pentane/diethyl ether 100:0 to 7:3), to give **3ai** (0.0177 g, 0.062 mmol, 62%) as a colorless oil. R<sub>f</sub> = 0.4 in 5% pentane/diethyl ether. <sup>1</sup>H NMR (400 MHz, CDCl<sub>3</sub>) δ 7.34 – 7.31 (m, 2H), 7.25 – 7.20 (m, 3H), 7.07 (d, *J* = 3.0 Hz, 1H), 6.86 (d, *J* = 8.8 Hz, 1H), 6.74 (dd, *J* = 8.9, 3.0 Hz, 1H), 3.88 (s, 3H), 3.83 (s, 3H), 3.49 (br. s, 1H), 3.38 (t, *J* = 6.9 Hz, 2H), 2.91 (t, *J* = 6.9 Hz, 2H). <sup>13</sup>C NMR (101 MHz, CDCl<sub>3</sub>) δ 167.1, 151.8, 141.9, 139.3, 128.9, 128.8, 126.6, 120.9, 118.4, 116.0, 114.6, 57.1, 52.2, 45.9, 35.6. HRMS (ESI): calcd for C<sub>17</sub>H<sub>19</sub>NaNO<sub>3</sub> [M+Na]<sup>+</sup>: 308.1257; found: 308.1255.

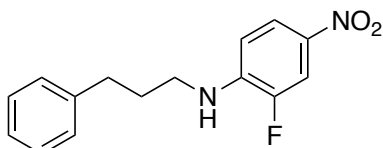

**2-Fluoro-4-nitro-N-(3-phenylpropyl)aniline (3aj):** (R)-1-phenylethan-1-amine (**1a**, 0.014 mL, 0.1 mmol) was arylated with salt **2s** (0.049g, 1.0 equiv) according to the general procedure in toluene (0.5 mL) for 4 h. Purified by column chromatography (pentane/EtOAc 100:5), to give **3aj** (0.017 mg, 0.062 mol, 62%) as a yellow oil. R<sub>f</sub> = 0.15 in 5% pentane/ethyl acetate. <sup>1</sup>H NMR (400 MHz, CDCl<sub>3</sub>) δ 7.97 (dd, *J* = 9.0 Hz, 2.4 Hz, 1H), 7.87 (dd, *J* = 11.6 Hz, 2.4 Hz, 1H), 7.33 – 7.30 (m, 2H), 7.25 – 7.18 (m, 3H), 6.55 (t, *J* = 8.6 Hz, 1H), 4.63 (br. s, 1H), 3.27 (q, *J* = 6.8 Hz, 2H), 2.16 (t, *J* = 7.4 Hz, 2H), 2.03 (app. p, *J* = 7.3 Hz, 2H). <sup>13</sup>C NMR (101 MHz, CDCl<sub>3</sub>) δ 149.1 (d, <sup>1</sup>*J*<sub>F-C</sub> = 240 Hz), 142.8, 142.7, 140.8, 136.7 (d, <sup>2</sup>*J*<sub>F-C</sub> = 8.6 Hz), 128.8, 128.5, 126.5, 122.5 (d, <sup>3</sup>*J*<sub>F-C</sub> = 2.3 Hz) 110.9 (d, <sup>2</sup>*J*<sub>F-C</sub> = 23.1 Hz), 109.2 (d, <sup>3</sup>*J*<sub>F-C</sub> = 4.0 Hz), 42.5, 33.2, 30.5.

$^{19}\text{F}$  NMR (377 MHz,  $\text{CDCl}_3$ )  $\delta$  - 135.61. HRMS (ESI): calcd for  $\text{C}_{15}\text{H}_{15}\text{N}_2\text{O}_2\text{F}$  ( $[\text{M} + \text{Na}^+]$ ): 297.1010; found: 297.1037

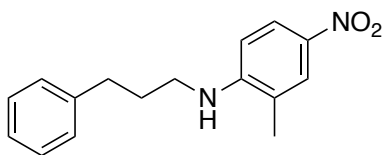

**2-methyl-4-nitro-N-(3-phenylpropyl)aniline (3ak):** (R)-1-phenylethan-1-amine (**1a**, 0.05 mL, 0.35 mmol) was arylated with salt **2t** (0.172g, 1.0 equiv) according to the general procedure in toluene (1.75 mL) for 4 h. Purified by column chromatography (pentane/EtOAc 100:10) to give **3ak** (0.071 mg, 0.26 mol, 75%) as a yellow oil.  $R_f$  = 0.31 in 10% pentane/ethyl acetate.  $^1\text{H}$  NMR (400 MHz,  $\text{CDCl}_3$ )  $\delta$  8.05 (dd,  $J$  = 9.0 Hz, 2.5 Hz, 1H), 7.95 (d,  $J$  = 2.2 Hz, 1H), 7.37 – 7.32 (m, 2H), 7.27 – 7.23 (m, 3H), 6.48 (d,  $J$  = 9.0 Hz, 1H), 4.34 (br. s, 1H), 3.32 (q,  $J$  = 7.0 Hz), 2.81 (t,  $J$  = 7.3 Hz, 2H), 2.11 – 2.04 (m, 5H).  $^{13}\text{C}$  NMR (101 MHz,  $\text{CDCl}_3$ )  $\delta$  151.6, 141.1, 137.2, 128.7, 128.4, 126.3, 126.0, 124.7, 121.0, 107.6, 43.1, 33.4, 30.4, 17.1; HRMS (ESI): calcd for  $\text{C}_{16}\text{H}_{18}\text{N}_2\text{O}_2$  ( $[\text{M} + \text{Na}^+]$ ): 293.1260; found: 293.1255.

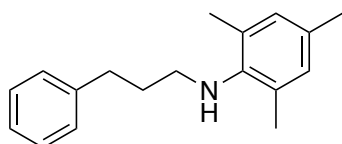

**2,4,6-trimethyl-N-(3-phenylpropyl)aniline (3al).** (R)-1-phenylethan-1-amine (**1a**, 0.05 mL, 0.35 mmol) was arylated with salt **2u** (0.181 g, 1.0 equiv) according to the general procedure in toluene (1.75 mL) for 22 h. Purified by column chromatography (pentane/EtOAc 100:5), to give **3al** (0.078 g, 0.31 mmol, 88%) as a colorless oil.  $R_f$  = 0.28 in 5% pentane/ethyl acetate.  $^1\text{H}$  NMR (400 MHz,  $\text{CDCl}_3$ )  $\delta$  7.34 – 7.30 (m, 2H), 7.24 – 7.20 (m, 3H), 6.84 (s, 2H), 3.00 (t,  $J$  = 7.1 Hz, 2H), 2.75 (t,  $J$  = 7.5 Hz, 2H), 2.27 (s, 6H), 2.26 (s, 3H), 1.94 (app. p,  $J$  = 7.5 Hz, 2H).  $^{13}\text{C}$  NMR (101 MHz,  $\text{CDCl}_3$ )  $\delta$  143.7, 142.0, 131.2, 129.6, 129.5, 128.5, 126.0, 48.7, 33.7, 33.0, 21.7, 18.5. The analytical data are consistent with previous reports.<sup>[43]</sup>

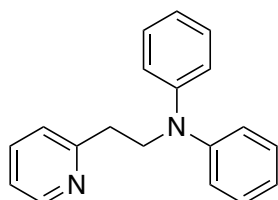

**N-Phenyl-N-(2-(pyridin-2-yl)ethyl)aniline (4):** 2-(Pyridin-2-yl)ethan-1-amine (**1p**, 0.012 mL, 0.1 mmol) was arylated with salt **2h** (0.043 g, 1.0 equiv) according to the general procedure in toluene (0.5 mL) for 22 h. Purified by column chromatography (pentane/diethyl ether 100:0 to 4:1), to give **4** (0.0103 g, 0.038 mmol, 75%, yield calculated with respect to the consumption of **2h**) as a colorless oil.  $R_f$  = 0.3 in 20% pentane/diethyl ether. The monoarylated product was not detected.  $^1\text{H}$  NMR (400 MHz,  $\text{CDCl}_3$ )  $\delta$  8.57 – 8.55 (m, 1H), 7.56 (td,  $J$  = 7.6, 1.8 Hz, 1H), 7.28 – 7.23 (m, 5H), 7.14 – 7.08 (m, 2H), 7.00 – 6.98 (m, 3H), 7.06 – 6.92 (m, 2H), 4.13 (app. t,  $J$  = 7.6 Hz, 2H), 3.13 (app. t,  $J$  = 7.6 Hz, 2H).  $^{13}\text{C}$  NMR (101 MHz,  $\text{CDCl}_3$ )  $\delta$  159.7, 149.6, 147.9, 136.5, 129.4, 123.7, 121.5, 121.4, 121.1, 53.3, 36.2. HRMS (ESI): calcd for  $\text{C}_{19}\text{H}_{19}\text{N}_2$   $[\text{M} + \text{H}]^+$ : 275.1543; found: 275.1538.

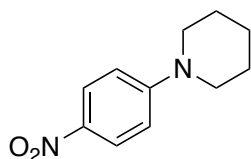

**1-(4-Nitrophenyl)piperidine (5a):** Piperidine (**1q**, 0.010 mL, 0.1 mmol) was arylated with salt **2a** (0.048 g, 1.0 equiv) according to the general procedure in toluene (0.5 mL) for 4 h. Purified by column chromatography (pentane/EtOAc 100:0 to 100:3), to give **5a** (0.0203 g, 0.098 mmol, 98%) as a yellow oil.  $R_f$  = 0.4 in 5% pentane/ethyl acetate.  $^1\text{H}$  NMR (400 MHz,  $\text{CDCl}_3$ )  $\delta$  8.11 – 8.07 (m, 2H), 6.80 – 6.76 (m, 2H),

3.47 – 3.40 (m, 4H), 1.70 – 1.67 (m, 6H).  $^{13}\text{C}$  NMR (101 MHz,  $\text{CDCl}_3$ )  $\delta$  155.1, 137.7, 126.3, 112.5, 48.5, 25.4, 24.4. The analytical data are consistent with previous reports.<sup>[44]</sup>

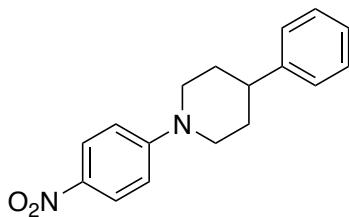

**1-(4-Nitrophenyl)-4-phenylpiperidine (5b):** 4-Phenylpiperidine (**1r**, 0.016 g, 0.1 mmol) was arylated with salt **2a** (0.048 g, 1.0 equiv) according to the general procedure in toluene (0.5 mL) for xx h. Purified by column chromatography (pentane/EtOAc 100:0 to 9:1), to give **5b** (0.0274 g, 0.097 mmol, 97%) as a yellow solid.  $R_f$  = 0.3 in 5% pentane/ethyl acetate.  $^1\text{H}$  NMR (400 MHz,  $\text{CDCl}_3$ )  $\delta$  8.16 – 8.12 (m, 2H), 7.37 – 7.30 (m, 2H), 7.25 – 7.20 (m, 3H), 6.89 – 6.85 (m, 2H), 4.12 – 4.07 (m, 2H), 3.09 (td,  $J$  = 12.1, 2.7 Hz, 2H), 2.80 (tt,  $J$  = 12.1, 3.8 Hz, 1H), 2.06 – 1.98 (m, 2H), 1.87 – 1.77 (m, 2H).  $^{13}\text{C}$  NMR (101 MHz,  $\text{CDCl}_3$ )  $\delta$  154.9, 145.2, 138.1, 128.8, 126.9, 126.8, 126.3, 112.8, 48.4, 42.6, 32.8. Mp = 163.9– 164.4 °C. HRMS (ESI): calcd for  $\text{C}_{17}\text{H}_{18}\text{NaN}_2\text{O}_2$   $[\text{M}+\text{Na}]^+$ : 305.1266; found: 305.1267.

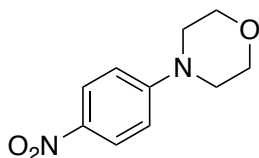

**4-(4-Nitrophenyl)morpholine (5c):** Morpholine (**1s**, 0.009 mL, 0.1 mmol) was arylated with salt **2a** (0.048 g, 1.0 equiv) according to the general procedure in toluene (0.5 mL) for 4 h. Purified by column chromatography (pentane/EtOAc 100:0 to 4:1), to give **5c** (0.0181 g, 0.087 mmol, 87%) as a yellow solid,  $R_f$  = 0.2 in 4:1 pentane/ethyl acetate.  $^1\text{H}$  NMR (400 MHz,  $\text{CDCl}_3$ )  $\delta$  8.17 – 8.12 (m, 2H), 6.85 – 6.81 (m, 2H), 3.88 – 3.85 (m, 4H), 3.39 – 3.36 (m, 4H).  $^{13}\text{C}$  NMR (101 MHz,  $\text{CDCl}_3$ )  $\delta$  155.2, 139.3, 126.0, 112.8, 66.5, 47.4. The analytical data are consistent with previous reports.<sup>[18]</sup>

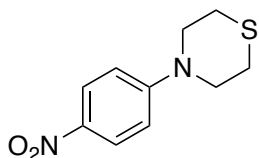

**4-(4-Nitrophenyl)thiomorpholine (5d):** Thiomorpholine (**1t**, 0.010 mL, 0.1 mmol) was arylated with salt **2a** (0.048 g, 1.0 equiv) according to the general procedure in toluene (0.5 mL) for 4 h. Purified by column chromatography (pentane/EtOAc 100:0 to 9:1), to give **5d** (0.0171 g, 0.076 mmol, 76%) as a yellow solid.  $R_f$  = 0.7 in 20% pentane/ethyl acetate.  $^1\text{H}$  NMR (400 MHz,  $\text{CDCl}_3$ )  $\delta$  8.15 – 8.11 (m, 2H), 6.80 – 6.76 (m, 2H), 3.87 – 3.85 (m, 4H), 2.73 – 2.70 (m, 4H).  $^{13}\text{C}$  NMR (101 MHz,  $\text{CDCl}_3$ )  $\delta$  153.8, 138.3, 126.4, 113.0, 50.5, 26.0. Mp = 138.4–139.8 °C. HRMS (ESI): calcd for  $\text{C}_{10}\text{H}_{12}\text{NaN}_2\text{O}_2\text{S}$   $[\text{M}+\text{Na}]^+$ : 247.0517; found: 247.0514.

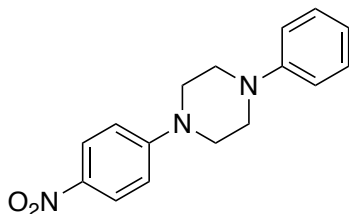

**1-(4-Nitrophenyl)-4-phenylpiperazine (5e):** 1-Phenylpiperazine (**1u**, 0.015 mL, 0.1 mmol) was arylated with salt **2a** (0.048 g, 1.0 equiv) according to the general procedure in toluene (0.5 mL) for 4 h. Purified by column chromatography (pentane/EtOAc 100:0 to 9:1), to give **5e** (0.0071 g, 0.025 mmol, 25%) as a yellow solid.  $R_f$  = 0.2 in 5% pentane/ethyl acetate.  $^1\text{H}$  NMR (400 MHz,  $\text{CDCl}_3$ )  $\delta$  8.18 – 8.14 (m, 2H), 7.35 – 7.28 (m, 2H), 6.98 – 6.86 (m, 5H), 3.61 – 3.58 (m, 4H), 3.38 – 3.35 (m, 4H).  $^{13}\text{C}$  NMR (101 MHz,  $\text{CDCl}_3$ )  $\delta$

154.9, 150.8, 138.9, 129.5, 126.1, 120.6, 116.5, 112.9, 49.1, 47.2. The analytical data are consistent with previous reports.<sup>[45]</sup>

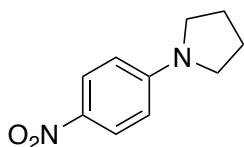

**1-(4-Nitrophenyl)pyrrolidine (5f):** 1-Phenylpiperazine (**1v**, 0.008 mL, 0.1 mmol) was arylated with salt **2a** (0.048 g, 1.0 equiv) according to the general procedure in toluene (0.5 mL) for 4 h. Purified by column chromatography (pentane/diethyl ether 100:0 to 92:8), to give **5f** (0.0191 g, 0.099 mmol, 99%) as a yellow solid.  $R_f = 0.3$  in 10% pentane/diethyl ether.  $^1\text{H NMR}$  (400 MHz,  $\text{CDCl}_3$ )  $\delta$  8.14 – 8.10 (m, 2H), 6.49 – 6.45 (m, 2H), 3.43 – 3.38 (m, 4H), 2.11 – 2.04 (m, 4H).  $^{13}\text{C NMR}$  (101 MHz,  $\text{CDCl}_3$ )  $\delta$  152.0, 136.8, 126.5, 110.6, 48.1, 25.6. The analytical data are consistent with previous reports.<sup>[46]</sup>

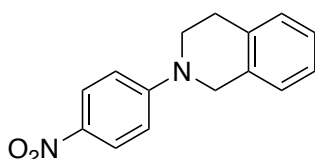

**2-(4-Nitrophenyl)-1,2,3,4-tetrahydroisoquinoline (5g):** 1,2,3,4-Tetrahydroisoquinoline (**1w**, 0.013 mL, 0.1 mmol) was arylated with salt **2a** (0.048 g, 1.0 equiv) according to the general procedure in toluene (0.5 mL) for 4 h. Purified by column chromatography (pentane/diethyl ether 100:0 to 92:8), to give **5g** (0.0242 g, 0.095 mmol, 95%) as a yellow solid.  $R_f = 0.2$  in 10% pentane/diethyl ether.  $^1\text{H NMR}$  (400 MHz,  $\text{CDCl}_3$ )  $\delta$  8.20 – 8.15 (m, 2H), 7.25 – 7.16 (m, 4H), 6.85 – 6.80 (m, 2H), 4.58 (s, 2H), 3.70 (t,  $J = 5.9$  Hz, 2H), 3.03 (t,  $J = 5.9$  Hz, 2H).  $^{13}\text{C NMR}$  (101 MHz,  $\text{CDCl}_3$ )  $\delta$  154.0, 137.8, 135.0, 133.3, 128.2, 127.3, 126.8, 126.6, 126.3, 111.4, 49.0, 44.9, 29.1. The analytical data are consistent with previous reports.<sup>[47]</sup>

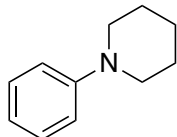

**1-Phenylpiperidine (5h):** Piperidine (**1q**, 0.010 mL, 0.1 mmol) was arylated with salt **2h** (0.043 g, 1.0 equiv) according to the general procedure in toluene (0.5 mL) for 4 h. Purified by column chromatography (pentane/diethyl ether 100:0 to 100:2), to give **5h** (0.0145 g, 0.090 mmol, 90%) as a colorless oil.  $R_f = 0.5$  in 5% pentane/diethyl ether.  $^1\text{H NMR}$  (400 MHz,  $\text{CDCl}_3$ )  $\delta$  7.30 – 7.21 (m, 2H), 7.00 – 6.93 (m, 2H), 6.84 – 6.80 (m, 1H), 3.20 – 3.10 (m, 4H), 1.76 – 1.67 (m, 4H), 1.61 – 1.55 (m, 2H).  $^{13}\text{C NMR}$  (101 MHz,  $\text{CDCl}_3$ )  $\delta$  152.4, 129.1, 119.3, 116.7, 50.8, 26.0, 24.5. The analytical data are consistent with previous reports.<sup>[48]</sup>

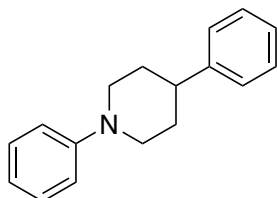

**1,4-Diphenylpiperidine (5i):** 4-Phenylpiperidine (**1r**, 0.016 g, 0.1 mmol) was arylated with salt **2h** (0.043 g, 1.0 equiv) according to the general procedure in toluene (0.5 mL) for 4 h. Purified by column chromatography (pentane/diethyl ether 100:0 to 100:2), to give **5i** (0.0196 g, 0.083 mmol, 83%) as a white solid.  $R_f = 0.5$  in 5% pentane/diethyl ether.  $^1\text{H NMR}$  (400 MHz,  $\text{CDCl}_3$ )  $\delta$  7.36 – 7.18 (m, 7H), 7.02 – 6.96 (m, 2H), 6.89 – 6.84 (m, 1H), 3.83 – 3.78 (m, 2H), 2.82 (td,  $J = 12.0, 3.4$  Hz, 2H), 2.69 – 2.61 (m, 1H), 1.99 – 1.82 (m, 4H).  $^{13}\text{C NMR}$  (101 MHz,  $\text{CDCl}_3$ )  $\delta$  152.0, 146.2, 129.2, 128.6, 127.0, 126.4, 119.6, 116.8, 50.7, 42.7, 33.5. The analytical data are consistent with previous reports.<sup>[49]</sup>

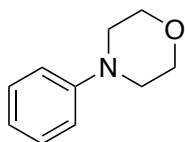

**4-Phenylmorpholine (5j):** Morpholine (**1s**, 0.009 mL, 0.1 mmol) was arylated with salt **2h** (0.043 g, 1.0 equiv) according to the general procedure in toluene (0.5 mL) for 4 h. Purified by column chromatography (pentane/EtOAc 100:0 to 100:5), to give **5j** (0.0141 g, 0.086 mmol, 86%) as a white solid,  $R_f = 0.3$  in 100:5 pentane/ethyl acetate.  $^1\text{H NMR}$  (400 MHz,  $\text{CDCl}_3$ )  $\delta$  7.31 – 7.27 (m, 2H), 6.94 – 6.86 (m, 3H), 3.88 – 3.86 (m, 4H), 3.18 – 3.15 (m, 4H).  $^{13}\text{C NMR}$  (101 MHz,  $\text{CDCl}_3$ )  $\delta$  151.4, 129.3, 120.2, 115.9, 67.1, 49.5. The analytical data are consistent with previous reports.<sup>[50]</sup>

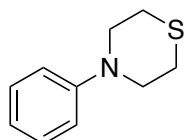

**4-Phenylthiomorpholine (5k):** Thiomorpholine (**1t**, 0.010 mL, 0.1 mmol) was arylated with salt **2h** (0.043 g, 1.0 equiv) according to the general procedure in toluene (0.5 mL) for 4 h. Purified by column chromatography (pentane/diethyl ether 100:0 to 100:3), to give **5k** (0.0148 g, 0.083 mmol, 83%) as a colorless oil.  $R_f = 0.3$  in 5% pentane/diethyl ether.  $^1\text{H NMR}$  (400 MHz,  $\text{CDCl}_3$ )  $\delta$  7.30 – 7.24 (m, 2H), 6.95 – 6.84 (m, 3H), 3.55 – 3.53 (m, 4H), 2.77 – 2.74 (m, 4H).  $^{13}\text{C NMR}$  (101 MHz,  $\text{CDCl}_3$ )  $\delta$  151.5, 129.4, 120.0, 117.3, 52.3, 27.0. HRMS (ESI): calcd for  $\text{C}_{10}\text{H}_{14}\text{NS}$   $[\text{M}+\text{H}]^+$ : 180.0841; found: 180.0846.

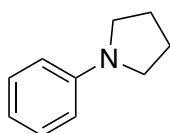

**1-Phenylpyrrolidine (5l):** Pyrrolidine (**1v**, 0.008 mL, 0.1 mmol) was arylated with salt **2h** (0.043 g, 1.0 equiv) according to the general procedure in toluene (0.5 mL) for 4 h. Purified by column chromatography (pentane/diethyl ether 100:0 to 100:2), to give **5l** (0.0094 g, 0.064 mmol, 64%) as a colorless oil.  $R_f = 0.6$  in 5% pentane/diethyl ether.  $^1\text{H NMR}$  (400 MHz,  $\text{CDCl}_3$ )  $\delta$  7.25 – 7.20 (m, 2H), 6.68–6.65 (m, 1H), 6.59 – 6.56 (m, 2H), 3.30 – 3.27 (m, 4H), 2.23 – 1.99 (m, 4H).  $^{13}\text{C NMR}$  (101 MHz,  $\text{CDCl}_3$ )  $\delta$  148.1, 129.3, 115.5, 111.8, 47.7, 25.6. The analytical data are consistent with previous reports.<sup>[51]</sup>

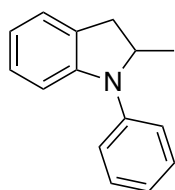

**2-methyl-1-phenylindoline (5m).** 2-methylindoline (**1x**, 0.05 mL, 0.4 mmol) was arylated with salt **2h** (0.17 g, 1.0 equiv) according to the general procedure in toluene (2 mL) for 4 h. Purified by column chromatography (pentane/EtOAc 100:0 to 100:1), to give **5m** (0.0675 g, 0.032 mmol, 84%) as a colorless oil.  $R_f = 0.76$  in 5% pentane/ethyl acetate.  $^1\text{H NMR}$  (400 MHz,  $\text{CDCl}_3$ )  $\delta$  7.47 - 7.42 (m, 2H), 7.37 – 7.31 (m, 2H), 7.22 (dd,  $J = 7.3, 1.4$  Hz, 1H), 7.17 – 7.08 (m, 2H), 6.96 – 6.91 (m, 1H), 6.82 (td,  $J = 7.3, 1.0$  Hz, 1H), 4.46 (ddq,  $J = 8.8, 7.5, 6.2$  Hz, 1H), 3.40 (dd,  $J = 15.5, 8.8$  Hz, 1H), 2.83 (dd,  $J = 15.5, 7.5$  Hz, 1H), 1.41 (d,  $J = 6.2$  Hz, 3H).  $^{13}\text{C NMR}$  (101 MHz,  $\text{CDCl}_3$ )  $\delta$  148.6, 143.4, 129.6, 129.3, 127.2, 125.0, 122.7, 121.4, 118.7, 108.3, 59.7, 37.2, 20.1. HRMS (ESI): calcd for  $\text{C}_{15}\text{H}_{16}\text{N}$   $[\text{M}+\text{H}]^+$ : 210.1277; found: 210.1276. The  $^{13}\text{C NMR}$  spectral data were in good agreement with those reported in the literature, whereas the  $^1\text{H NMR}$  data differs slightly.<sup>[52]</sup>

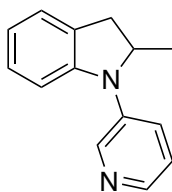

**2-methyl-1-(pyridin-3-yl)indoline (5n).** 2-methylindoline (**1x**, 0.05 mL, 0.4 mmol) was arylated with salt **2v** (0.18 g, 1.0 equiv) according to the general procedure in toluene (2 mL) for 4 h. Purified by column chromatography (pentane/EtOAc 10:1 to 10:3), to give **5n** (0.0365 g, 0.018 mmol, 45%) as a yellow oil.  $R_f = 0.37$  in 5% pentane/ethyl acetate.  $^1\text{H NMR}$  (400 MHz,  $\text{CDCl}_3$ )  $\delta$  8.66 (br. s, 1H), 8.34 (br. s, 1H), 7.58 – 7.55 (m, 1H), 7.31 – 7.28 (m, 1H), 7.16 (app. d,  $J = 7.3$  Hz, 1H), 7.06 (app. t,  $J = 7.7$  Hz, 1H), 6.87 (d,  $J = 7.8$  Hz, 1H), 6.79 (app. t,  $J = 7.4$  Hz, 1H), 4.41 (dp,  $J = 8.8, 6.2$  Hz, 1H), 3.36 (dd,  $J = 15.5, 8.8$  Hz, 1H), 2.77 (dd,  $J = 15.5, 6.9$  Hz, 1H), 1.34 (d,  $J = 6.2$  Hz, 3H).  $^{13}\text{C NMR}$  (101 MHz,  $\text{CDCl}_3$ )  $\delta$  147.3, 143.2, 143.1, 140.2, 129.7, 127.3, 125.2, 124.0, 119.7, 108.4, 59.6, 37.2, 20.0. HRMS (ESI): calcd for  $\text{C}_{14}\text{H}_{15}\text{N}_2$   $[\text{M}+\text{H}]^+$ : 211.1230; found: 211.1229.

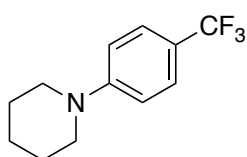

**1-(4-(Trifluoromethyl)phenyl)piperidine (5o):** Piperidine (**1q**, 0.009 mL, 0.1 mmol) was arylated with salt **2j** (0.053 g, 1.0 equiv) according to the general procedure in toluene (0.5 mL) for 4 h. Purified by column chromatography (pentane/EtOAc 100:5), to give **5m** (0.0119 g, 0.055 mmol, 55%) as a pale yellow oil in an inseparable mixture with 4-iodoanisole.  $R_f = 0.62$  in 5% pentane/ethyl acetate.  $^1\text{H NMR}$  (400 MHz,  $\text{CDCl}_3$ )  $\delta$  7.46 (d,  $J = 8.7$  Hz, 2H), 6.91 (d,  $J = 8.7$  Hz, 2H), 3.27 (m, 4H), 1.75 – 1.58 (m, 6H).  $^{13}\text{C NMR}$  (101 MHz,  $\text{CDCl}_3$ )  $\delta$  153.9, 126.4, (q,  $^3J_{\text{F-C}} = 3.7$  Hz), 125.2, (q,  $^1J_{\text{F-C}} = 266.9$  Hz), 119.7 (q,  $^2J_{\text{F-C}} = 32.4$  Hz), 114.7, 49.5, 25.6, 24.4.  $^{19}\text{F NMR}$  (377 MHz,  $\text{CDCl}_3$ )  $\delta$  -61.2. HRMS (ESI): calcd for  $\text{C}_{12}\text{H}_{15}\text{F}_3\text{N}$   $[\text{M}+\text{H}]^+$ : 230.1151; found: 230.1150. The analytical data are consistent with previous reports.<sup>[53]</sup>  
4-Iodoanisole:  $^1\text{H NMR}$  (400 MHz,  $\text{CDCl}_3$ )  $\delta$  7.56 (d,  $J = 8.9$  Hz, 2H), 6.69 (d,  $J = 8.9$  Hz, 2H), 3.78 (s, 3H),  $^{13}\text{C NMR}$  (101 MHz,  $\text{CDCl}_3$ )  $\delta$  159.6, 138.3, 116.5, 82.8, 55.5.

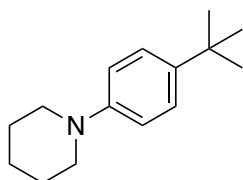

**1-(4-(tert-Butyl)phenyl)piperidine (5p):** Piperidine (**1q**, 0.009 mL, 0.1 mmol) was arylated with salt **2o** (0.054 g, 1.0 equiv) according to the general procedure in toluene (0.5 mL) for 4 h. Purified by column chromatography (pentane/EtOAc 100:5), to give **5p** (0.0119 g, 0.055 mmol, 55%) as a pale yellow oil.  $R_f = 0.62$  in 5% pentane/ethyl acetate.  $^1\text{H NMR}$  (400 MHz,  $\text{CDCl}_3$ )  $\delta$  7.30-7.26 (m, 2H), 6.91-6.87 (m, 2H), 3.14-3.11 (m, 4H), 1.74 – 1.67 (m, 4H), 1.60 – 1.52 (m, 2H), 1.30 (s, 9H).  $^{13}\text{C NMR}$  (101 MHz,  $\text{CDCl}_3$ )  $\delta$  150.1, 142.0, 125.9, 116.4, 51.0, 34.1, 31.6, 31.6, 26.2, 24.5. The analytical data are consistent with previous reports.<sup>[54]</sup>

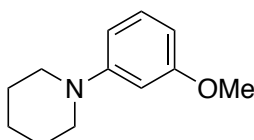

**1-(3-Methoxyphenyl)piperidine (5q):** Piperidine (**1q**, 0.04 mL, 0.4 mmol) was arylated with salt **2q** (0.21 g, 1.0 equiv) according to the general procedure in toluene (2 mL) for 4 h. Purified by column chromatography (pentane/EtOAc 100:0 to 100:5), to give **5q** (0.0348 g, 0.18 mmol, 46%) as a colorless oil.  $R_f = 0.60$  in 5% pentane/ethyl acetate.  $^1\text{H NMR}$  (400 MHz,  $\text{CDCl}_3$ )  $\delta$  7.17 (t,  $J = 8.4$  Hz, 1H), 6.57 (dd,  $J = 8.4, 2.1$  Hz, 1H), 6.50 (t,  $J = 2.4$  Hz, 1H), 6.40 (dd,  $J = 8.4, 2.1$  Hz, 1H), 3.80 (s, 3H), 3.17 (t,  $J = 5.4$ , 4H), 1.76 – 1.66 (m,

4H), 1.62 – 1.55 (m, 2H).  $^{13}\text{C}$  NMR (101 MHz,  $\text{CDCl}_3$ )  $\delta$  160.7, 153.7, 129.7, 109.4, 104.1, 102.9, 55.3, 50.7, 25.9, 24.5. The analytical data are consistent with previous reports.<sup>[55]</sup>

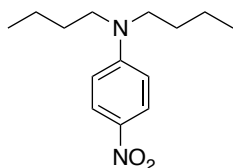

***N,N*-Dibutyl-4-nitroaniline (5r)**: Dibutylamine (**1y**, 0.017 mL, 0.1 mmol) was arylated with salt **2a** (0.048 g, 1.0 equiv) according to the general procedure in toluene (0.5 mL) for 4 h. Purified by column chromatography (pentane/diethyl ether 100:0 to 100:5), to give **5r** (0.0193 g, 0.077 mmol, 77%) as a yellow solid.  $R_f$  = 0.5 in 10% pentane/diethyl ether.  $^1\text{H}$  NMR (400 MHz,  $\text{CDCl}_3$ )  $\delta$  8.18 – 8.07 (m, 2H), 6.57 – 6.52 (m, 2H), 3.40 – 3.34 (m, 4H), 1.64 – 1.57 (m, 4H), 1.43 – 1.33 (m, 4H), 0.98 (t,  $J$  = 7.3 Hz, 6H).  $^{13}\text{C}$  NMR (101 MHz,  $\text{CDCl}_3$ )  $\delta$  152.7, 136.4, 126.6, 110.1, 51.2, 29.4, 20.4, 14.1. The analytical data are consistent with previous reports.<sup>[56]</sup>

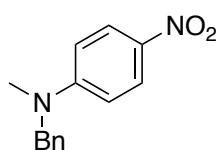

***N*-Benzyl-*N*-methyl-4-nitroaniline (5s)**: *N*-methyl-1-phenylmethanamine (**1z**, 0.05 mL, 0.4 mmol) was arylated with salt **2a** (0.19 g, 1.0 equiv) according to the general procedure in toluene (2 mL) for 4 h. Purified by column chromatography (pentane/EtOAc 100:0 to 100:7), to give **5s** (0.0780 g, 0.32 mmol, 79%) as a yellow solid.  $R_f$  = 0.15 in 5% pentane/ethyl acetate.  $^1\text{H}$  NMR (400 MHz,  $\text{CDCl}_3$ )  $\delta$  8.08 (d,  $J$  = 9.4 Hz, 2H), 7.36 – 7.34 (m, 2H), 7.31 – 7.27 (m, 1H), 7.19 – 7.14 (m, 2H), 6.65 (d,  $J$  = 9.4 Hz, 2H), 4.67 (s, 2H), 3.19 (s, 3H).  $^{13}\text{C}$  NMR (101 MHz,  $\text{CDCl}_3$ )  $\delta$  153.9, 137.3, 136.7, 129.0, 127.6, 126.3, 126.2, 110.6, 56.2, 39.2. Mp = 60.2–63.8 °C. HRMS (ESI): calcd for  $\text{C}_{14}\text{H}_{14}\text{NaN}_2\text{O}_2$   $[\text{M}+\text{Na}]^+$ : 265.0947; found: 265.0946. The analytical data are consistent with previous reports.<sup>[57]</sup>

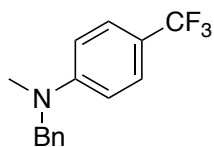

***N*-Benzyl-*N*-methyl-4-(trifluoromethyl)aniline (5t)**: *N*-methyl-1-phenylmethanamine (**1z**, 0.05 mL, 0.4 mmol) was arylated with salt **2j** (0.20 g, 1.0 equiv) according to the general procedure in toluene (2 mL) for 4 h. Purified by column chromatography (pentane/EtOAc 100:0 to 100:5), to give **5t** (0.0722 g, 0.27 mmol, 68%) as a pale yellow oil.  $R_f$  = 0.74 in 5% pentane/ethyl acetate.  $^1\text{H}$  NMR (400 MHz,  $\text{CDCl}_3$ )  $\delta$  7.45 (app. d,  $J$  = 8.6 Hz, 2H), 7.38 – 7.31 (m, 2H), 7.30 – 7.28 (m, 1H), 7.23 – 7.18 (m, 2H), 6.74 (app. d,  $J$  = 8.6 Hz, 2H), 4.60 (s, 2H), 3.11 (s, 3H).  $^{13}\text{C}$  NMR (101 MHz,  $\text{CDCl}_3$ )  $\delta$  151.7, 138.0, 128.9, 127.29, 126.8 (q,  $^3J_{F-C}$  = 27.1 Hz), 126.6 (q,  $^4J_{F-C}$  = 3.7 Hz), 126.6, 125.3 (q,  $^1J_{F-C}$  = 269.6 Hz), 117.9 (q,  $^2J_{F-C}$  = 32.6 Hz), 111.3, 56.22, 38.80.  $^{19}\text{F}$  NMR (377 MHz,  $\text{CDCl}_3$ )  $\delta$  -60.7. HRMS (ESI): calcd for  $\text{C}_{15}\text{H}_{15}\text{F}_3\text{N}$   $[\text{M}+\text{H}]^+$ : 266.1151; found: 266.1154. The analytical data are consistent with previous reports.<sup>[58]</sup>

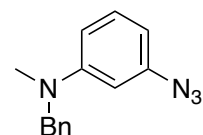

**3-Azido-*N*-benzyl-*N*-methylaniline (5u)**: *N*-methyl-1-phenylmethanamine (**1z**, 0.05 mL, 0.4 mmol) was arylated with salt **2i** (0.21 g, 1.0 equiv) according to the general procedure in toluene (2 mL) for 4 h. Purified by column chromatography (pentane/EtOAc 100:0 to 100:3), to give **5u** (0.055 g, 0.23 mmol, 57%) as a yellow oil in an inseparable mixture with 4-iodoanisole.  $R_f$  = 0.71 in 5% pentane/ethyl acetate.  $^1\text{H}$  NMR (400 MHz,  $\text{CDCl}_3$ )  $\delta$  7.38 – 7.32 (m, 2H), 7.32 – 7.27 (m, 1H), 7.26 – 7.17 (m, 3H), 6.55 (m, 1H), 6.45 (m, 1H), 6.37 (t,  $J$  = 2.3 Hz, 1H), 4.56 (s, 2H), 3.06 (s, 3H).  $^{13}\text{C}$  NMR (101 MHz,  $\text{CDCl}_3$ )  $\delta$  151.0, 141.1, 138.5,



130.4, 128.8, 127.1, 126.7, 109.2, 106.9, 102.8, 56.5, 38.7. HRMS (ESI): calcd for C<sub>14</sub>H<sub>15</sub>N<sub>4</sub> [M+H]<sup>+</sup>: 239.1291; found: 239.1291.

4-Iodoanisole: <sup>1</sup>H NMR (400 MHz, CDCl<sub>3</sub>) δ 7.56 (d, *J* = 8.9 Hz, 2H), 6.69 (d, *J* = 8.9 Hz, 2H), 3.80 (s, 3H), <sup>13</sup>C NMR (101 MHz, CDCl<sub>3</sub>) δ 159.6, 138.3, 116.5, 82.8, 55.45

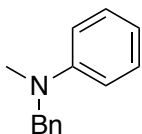

***N*-Benzyl-*N*-methylaniline (5v):** *N*-methyl-1-phenylmethanamine (**1z**, 0.05 mL, 0.4 mmol) was arylated with salt **2h** (0.18 g, 1.0 equiv) according to the general procedure in toluene (2 mL) for 4 h. Purified by column chromatography (pentane/EtOAc 100:0 to 100:5), to give **5v** (0.0563 g, 0.29 mmol, 71%) as a pale yellow oil. *R*<sub>f</sub> = 0.82 in 5% pentane/ethyl acetate. <sup>1</sup>H NMR (400 MHz, CDCl<sub>3</sub>) δ 7.36 – 7.32 (m, 2H), 7.29 – 7.21 (m, 5H), 6.80 – 6.73 (m, 3H), 4.55 (s, 2H), 3.03 (s, 3H). <sup>13</sup>C NMR (101 MHz, CDCl<sub>3</sub>) δ 149.8, 139.1, 129.3, 128.7, 127.0, 126.8, 116.7, 112.5, 56.7, 38.6. The analytical data are consistent with previous reports.<sup>[57]</sup>

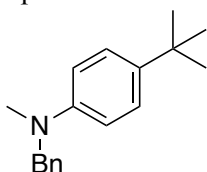

***N*-Benzyl-4-(*tert*-butyl)-*N*-methylaniline (5w):** *N*-methyl-1-phenylmethanamine (**1z**, 0.05 mL, 0.4 mmol) was arylated with salt **2o** (0.22 g, 1.0 equiv) according to the general procedure in toluene (2 mL) for 4 h. Purified by column chromatography (pentane/EtOAc 100:0 to 100:5), to give **5w** (0.0593 g, 0.23 mmol, 58%) as a colorless oil. *R*<sub>f</sub> = 0.61 in 5% pentane/ethyl acetate. <sup>1</sup>H NMR (400 MHz, CDCl<sub>3</sub>) δ 7.37 – 7.20 (m, 7H), 6.76 – 6.72 (m, 2H), 4.50 (s, 2H), 2.99 (s, 3H), 1.31 (s, 9H). <sup>13</sup>C NMR (101 MHz, CDCl<sub>3</sub>) δ 147.8, 139.5, 139.4, 128.6, 127.0, 126.9, 126.1, 112.3, 57.1, 38.6, 33.9, 31.7. HRMS (ESI): calcd for C<sub>18</sub>H<sub>24</sub>N [M+H]<sup>+</sup>: 254.1903; found: 254.1901. The analytical data are consistent with previous reports.<sup>[59]</sup>

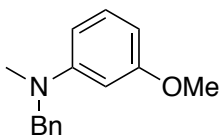

***N*-benzyl-3-methoxy-*N*-methylaniline (5x):** *N*-methyl-1-phenylmethanamine (**1z**, 0.05 mL, 0.4 mmol) was arylated with salt **2q** (0.21 g, 1.0 equiv) according to the general procedure in toluene (2 mL) for 4 h. Purified by column chromatography (pentane/EtOAc 100:0 to 100:3), to give **5x** (0.059 g, 0.26 mmol, 65%) in an inseparable mixture with 4-iodoanisole. *R*<sub>f</sub> = 0.54 in 5% pentane/ethyl acetate. <sup>1</sup>H NMR (400 MHz, CDCl<sub>3</sub>) δ 7.35 – 7.28 (m, 2H), 7.25 – 7.21 (m, 3H), 7.16 – 7.09 (m, 1H), 6.41 – 6.35 (m, 1H), 6.32 – 6.29 (m, 2H), 4.53 (s, 2H), 3.78 (s, 3H), 3.01 (s, 3H). <sup>13</sup>C NMR (101 MHz, CDCl<sub>3</sub>) δ 160.9, 151.3, 139.1, 130.0, 128.7, 127.0, 126.9, 105.7, 101.5, 99.1, 56.7, 55.4, 38.7. HRMS (ESI): calcd for C<sub>15</sub>H<sub>18</sub>NO [M+H]<sup>+</sup>: 228.1383; found: 228.1390. The analytical data are consistent with previous reports.<sup>[60]</sup>

4-Iodoanisole: <sup>1</sup>H NMR (400 MHz, CDCl<sub>3</sub>) δ 7.56 (d, *J* = 8.9 Hz, 2H), 6.69 (d, *J* = 8.9 Hz, 2H), 3.78 (s, 3H), <sup>13</sup>C NMR (101 MHz, CDCl<sub>3</sub>) δ 159.6, 138.3, 116.5, 82.8, 55.4

## 6 References

- [1] A. I. Vogel, B. S. Furniss, A. J. Hannaford, V. Rogers, P. W. G. Smith, A. R. Tatchell, *Vogel's Textbook of Practical Organic Chemistry 5th Ed.*, Prentice Hall: Harlow, **1996**.
- [2] M. Zhu, N. Jalalian, B. Olofsson, *Synlett* **2008**, *2008*, 592-596.
- [3] aN. Jalalian, T. B. Petersen, B. Olofsson, *Chem. Eur. J.* **2012**, *18*, 14140-14149; bP.-O. Norrby, T. B. Petersen, M. Bielawski, B. Olofsson, *Chem. Eur. J.* **2010**, *16*, 8251-8254.
- [4] M. Bielawski, B. Olofsson, *Chem. Commun.* **2007**, 2521-2523.
- [5] M. Bielawski, D. Aili, B. Olofsson, *J. Org. Chem.* **2008**, *73*, 4602-4607.
- [6] M. Bielawski, M. Zhu, B. Olofsson, *Adv. Synth. Catal.* **2007**, *349*, 2610-2618.
- [7] A. Monastyrskyi, N. K. Namelikonda, R. Manetsch, *J. Org. Chem.* **2015**, *80*, 2513-2520.
- [8] T. B. Petersen, R. Khan, B. Olofsson, *Org. Lett.* **2011**, *13*, 3462-3465.
- [9] G. L. Tolnai, U. J. Nilsson, B. Olofsson, *Angew. Chem. Int. Ed.* **2016**, *55*, 11226-11230.
- [10] N. Jalalian, E. E. Ishikawa, L. F. Silva, B. Olofsson, *Org. Lett.* **2011**, *13*, 1552-1555.
- [11] J.-H. Chun, S. Lu, V. W. Pike, *Eur. J. Org. Chem.* **2011**, *2011*, 4439-4447.
- [12] Y. Wang, C. Wang, Y. Wang, L. Dong, J. Sun, *RSC Advances* **2015**, *5*, 12354-12357.
- [13] M. Bielawski, J. Malmgren, L. M. Pardo, Y. Wikmark, B. Olofsson, *ChemistryOpen* **2014**, *3*, 19-22.
- [14] P. Kazmierczak, L. Skulski, *Synthesis* **1995**, 1027-1032.
- [15] T. L. Seidl, S. K. Sundalam, B. McCullough, D. R. Stuart, *J. Org. Chem.* **2016**, *81*, 1998-2009.
- [16] aE. A. Merritt, V. M. T. Carneiro, L. F. Silva, B. Olofsson, *J. Org. Chem.* **2010**, *75*, 7416-7419; bT. Dohi, M. Ito, K. Morimoto, Y. Minamitsuji, N. Takenaga, Y. Kita, *Chem. Commun.* **2007**, 4152-4154.
- [17] V. Carreras, A. H. Sandtorv, D. R. Stuart, *J. Org. Chem.* **2017**, *82*, 1279-1284.
- [18] A. H. Sandtorv, D. R. Stuart, *Angew. Chem. Int. Ed.* **2016**, *55*, 15812-15815.
- [19] E. Stridfeldt, E. Lindstedt, M. Reitti, J. Blid, P.-O. Norrby, B. Olofsson, *Chem. Eur. J.* **2017**, DOI: 10.1002/chem.201703057.
- [20] aM. Ochiai, *Top. Curr. Chem.* **2003**, *224*, 5-68; bM. Ochiai, Y. Kitagawa, M. Toyonari, *ARKIVOC* **2003**, (iv), 43-48; cH. Pinto de Magalhães, H. P. Lüthi, A. Togni, *J. Org. Chem.* **2014**, *79*, 8374-8382; dH. Pinto de Magalhães, H. P. Lüthi, A. Togni, *Org. Lett.* **2012**, *14*, 3830-3833.
- [21] J. P. Patel, A.-H. Li, H. Dong, V. L. Korlipara, M. J. Mulvihill, *Tetrahedron Lett.* **2009**, *50*, 5975-5977.
- [22] R. Arundhathi, D. C. Kumar, B. Sreedhar, *Eur. J. Org. Chem.* **2010**, *2010*, 3621-3630.
- [23] K. Yang, Y. Qiu, Z. Li, Z. Wang, S. Jiang, *J. Org. Chem.* **2011**, *76*, 3151-3159.
- [24] P. L. Reddy, R. Arundhathi, D. S. Rawat, *RSC Advances* **2015**, *5*, 92121-92127.
- [25] Z. Wei, J. Li, N. Wang, Q. Zhang, D. Shi, K. Sun, *Tetrahedron* **2014**, *70*, 1395-1400.
- [26] K. Ladewig, A. Seifert, H. Hahn, M. Hietschold, N. Moszner, P. Burtscher, S. Spange, *J. Mat. Chem.* **2012**, *22*, 3839-3852.
- [27] X. Lei, L. Yan-Ping, S. Lin, X. Yan, C. Zhong-Sheng, F. Min, Y. Rong-Xin, D. Hong-Bin, *Chem. Eur. J.* **2016**, *22*, 6268-6276.
- [28] X. Ding, M. Huang, Z. Yi, D. Du, X. Zhu, Y. Wan, *J. Org. Chem.* **2017**, *82*, 5416-5423.
- [29] W. Liao, Y. Chen, Y. Liu, H. Duan, J. L. Petersen, X. Shi, *Chem. Commun.* **2009**, 6436-6438.
- [30] Z. Shao, S. Fu, M. Wei, S. Zhou, Q. Liu, *Angew. Chem. Int. Ed.* **2016**, *55*, 14653-14657.
- [31] M.-L. Yuan, J.-H. Xie, Q.-L. Zhou, *ChemCatChem* **2016**, *8*, 3036-3040.
- [32] P. Liu, R. Liang, L. Lu, Z. Yu, F. Li, *J. Org. Chem.* **2017**, *82*, 1943-1950.
- [33] L. Wu, I. Fleischer, R. Jackstell, M. Beller, *J. Am. Chem. Soc.* **2013**, *135*, 3989-3996.
- [34] J. M. Lopchuk, K. Fjelbye, Y. Kawamata, L. R. Malins, C.-M. Pan, R. Gianatassio, J. Wang, L. Prieto, J. Bradow, T. A. Brandt, M. R. Collins, J. Elleraas, J. Ewanicki, W. Farrell, O. O. Fadeyi, G. M. Gallego, J. J. Mousseau, R. Oliver, N. W. Sach, J. K. Smith, J. E. Spangler, H. Zhu, J. Zhu, P. S. Baran, *J. Am. Chem. Soc.* **2017**, *139*, 3209-3226.
- [35] D. B. Bagal, R. A. Watile, M. V. Khedkar, K. P. Dhake, B. M. Bhanage, *Catal. Sci. Tech.* **2012**, *2*, 354-358.
- [36] P. Yin, T.-P. Loh, *Org. Lett.* **2009**, *11*, 3791-3793.
- [37] M. H. S. A. Hamid, C. L. Allen, G. W. Lamb, A. C. Maxwell, H. C. Maytum, A. J. A. Watson, J. M. J. Williams, *J. Am. Chem. Soc.* **2009**, *131*, 1766-1774.
- [38] M.-C. Fu, R. Shang, W.-M. Cheng, Y. Fu, *Angew. Chem. Int. Ed.* **2015**, *54*, 9042-9046.
- [39] A. Heutling, F. Pohlki, S. Doye, *Chem. Eur. J.* **2004**, *10*, 3059-3071.
- [40] S.-L. Shi, S. L. Buchwald, *Angew. Chem. Int. Ed.* **2015**, *54*, 1646-1650.
- [41] S. Neogi, D. Naskar, *Synth. Commun.* **2011**, *41*, 1901-1915.
- [42] M. Bollenbach, P. Wagner, P. G. V. Aquino, J.-J. Bourguignon, F. Bihel, C. Salomé, M. Schmitt, *ChemSusChem* **2016**, *9*, 3244-3249.
- [43] H. Li, M. Achard, C. Bruneau, J.-B. Sortais, C. Darcel, *RSC Advances* **2014**, *4*, 25892-25897.
- [44] N. Iranpoor, F. Panahi, *Adv. Synth. Catal.* **2014**, *356*, 3067-3073.

- [45] M. Khatri, S. K. Rai, S. Alam, A. Vij, M. Tiwari, *Bioorg. Med. Chem* **2009**, *17*, 1890-1897.  
[46] Z. Zhang, C. Miao, C. Xia, W. Sun, *Org. Lett.* **2016**, *18*, 1522-1525.  
[47] G. Toma, R. Yamaguchi, *Eur. J. Org. Chem.* **2010**, *2010*, 6404-6408.  
[48] T. J. Barker, E. R. Jarvo, *J. Am. Chem. Soc.* **2009**, *131*, 15598-15599.  
[49] T. Shimasaki, M. Tobisu, N. Chatani, *Angew. Chem. Int. Ed.* **2010**, *49*, 2929-2932.  
[50] K. Swapna, A. Vijay Kumar, V. Prakash Reddy, K. Rama Rao, *J. Org. Chem.* **2009**, *74*, 7514-7517.  
[51] D. Hollmann, S. Bähn, A. Tillack, R. Parton, R. Altink, M. Beller, *Tetrahedron Lett.* **2008**, *49*, 5742-5745.  
[52] S. Riedmüller, B. J. Nachtsheim, *Synlett* **2015**, *26*, 651-655.  
[53] Y. Lin, M. Li, X. Ji, J. Wu, S. Cao, *Tetrahedron* **2017**, *73*, 1466-1472.  
[54] S. A. Girard, X. Hu, T. Knauber, F. Zhou, M.-O. Simon, G.-J. Deng, C.-J. Li, *Org. Lett.* **2012**, *14*, 5606-5609.  
[55] Y. Fang, Y. Zheng, Z. Wang, *Eur. J. Org. Chem.* **2012**, *2012*, 1495-1498.  
[56] R. Kuwano, M. Utsunomiya, J. F. Hartwig, *J. Org. Chem.* **2002**, *67*, 6479-6486.  
[57] S. Roy, M. J. Sarma, B. Kashyap, P. Phukan, *Chem. Commun.* **2016**, *52*, 1170-1173.  
[58] X.-Q. Zhang, Z.-X. Wang, *Org. Biomol. Chem.* **2014**, *12*, 1448-1453.  
[59] X. Bei, T. Uno, J. Norris, H. W. Turner, W. H. Weinberg, A. S. Guram, J. L. Petersen, *Organometallics* **1999**, *18*, 1840-1853.  
[60] C. Borch Jacobsen, M. Meldal, F. Diness, *Chem. Eur. J.* **2017**, *23*, 846-851.

## 7 NMR Spectra

### NMR spectrometer:

<sup>1</sup>H 400 MHz; <sup>13</sup>C 101 MHz, <sup>19</sup>F 377 MHz

### NMR solvents:

|                                            |                     |
|--------------------------------------------|---------------------|
| Diaryliodonium salts <b>2s</b> , <b>2t</b> | DMSO-d <sub>6</sub> |
| All products except <b>3z</b>              | CDCl <sub>3</sub>   |
| <b>3z</b>                                  | CD <sub>3</sub> OD  |

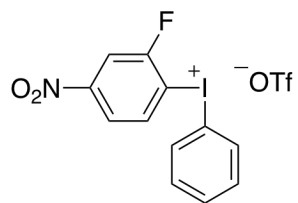

2s

8.70  
8.68  
8.68  
8.66  
8.45  
8.43  
8.43  
8.31  
8.29  
8.29  
8.23  
8.22  
8.21  
8.20  
7.72  
7.72  
7.71  
7.70  
7.68  
7.68  
7.58  
7.56  
7.54

— 3.48 DMSO

— 2.50 DMSO

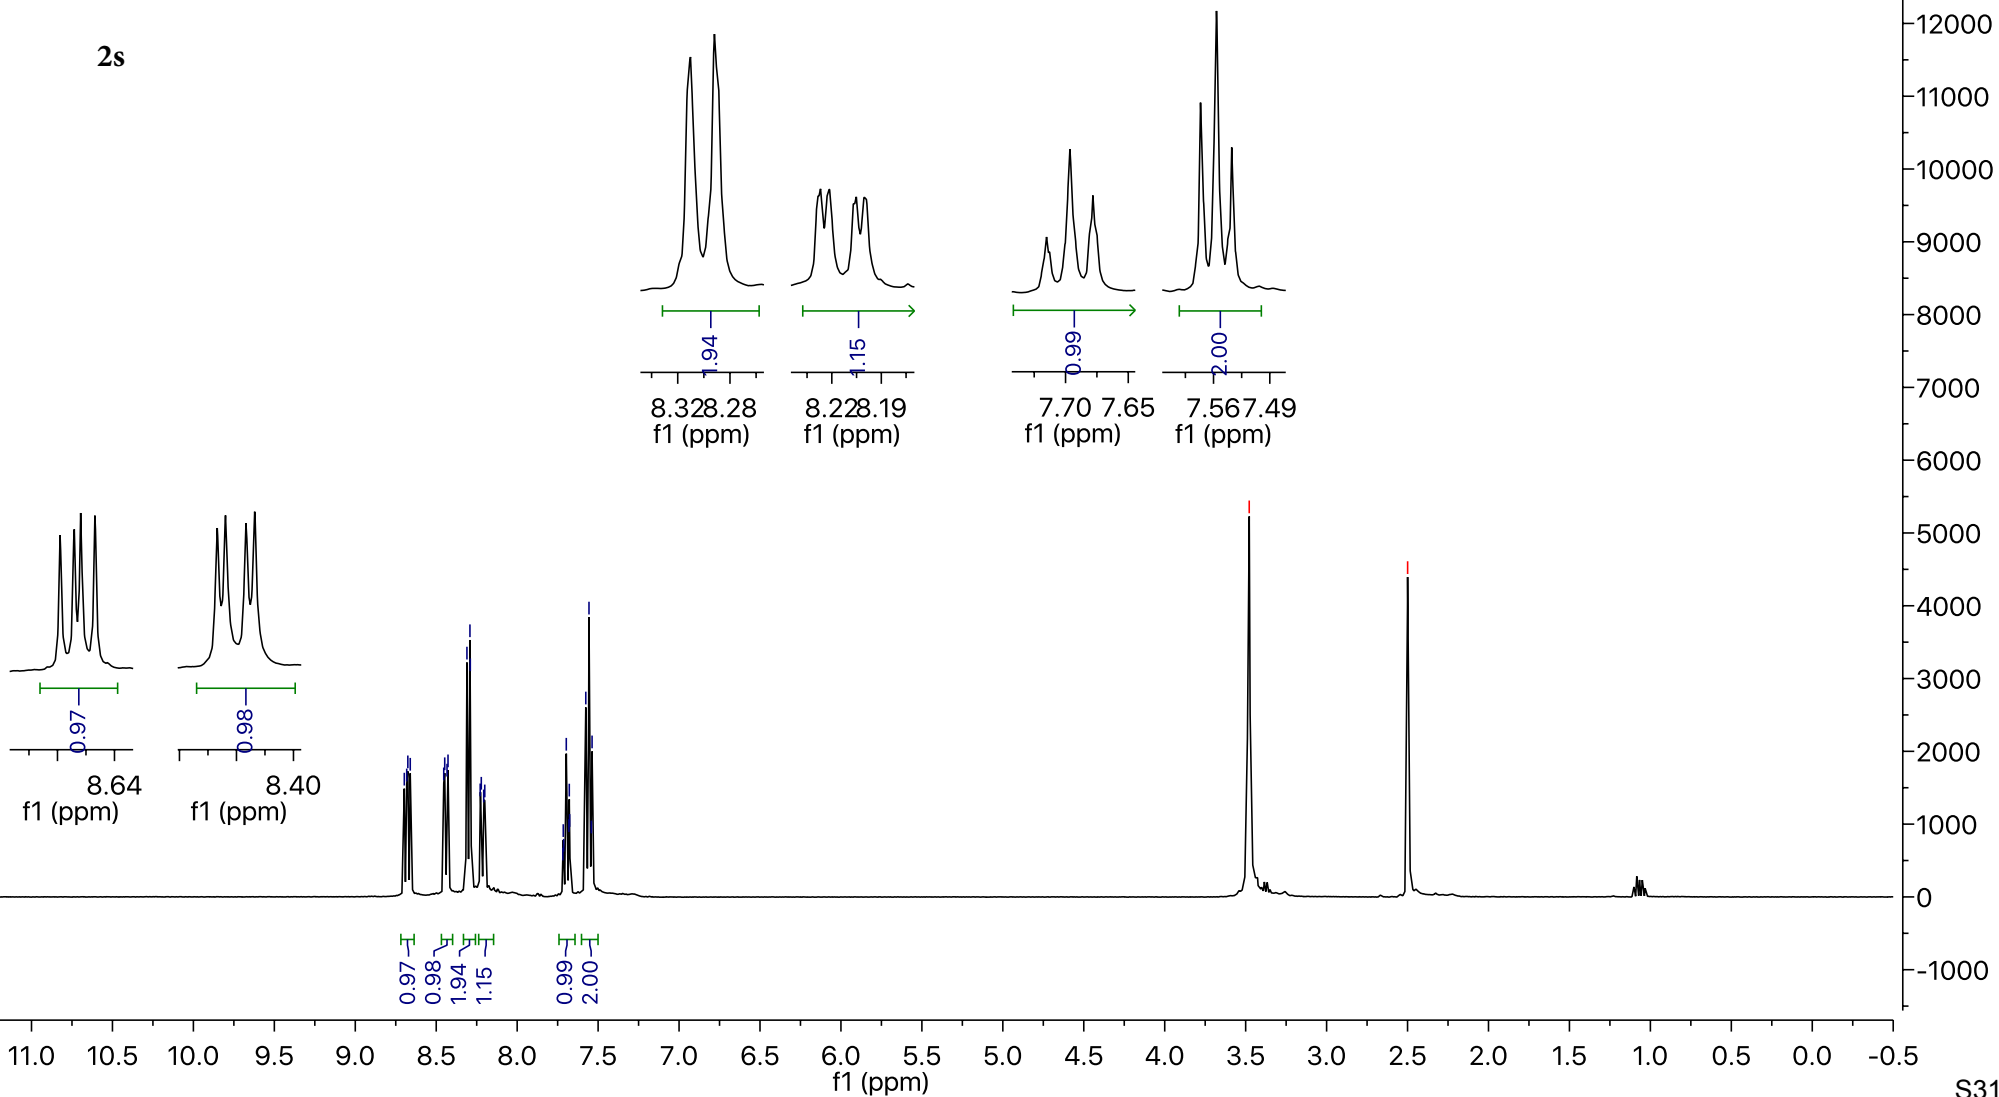

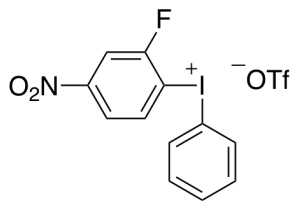

2s

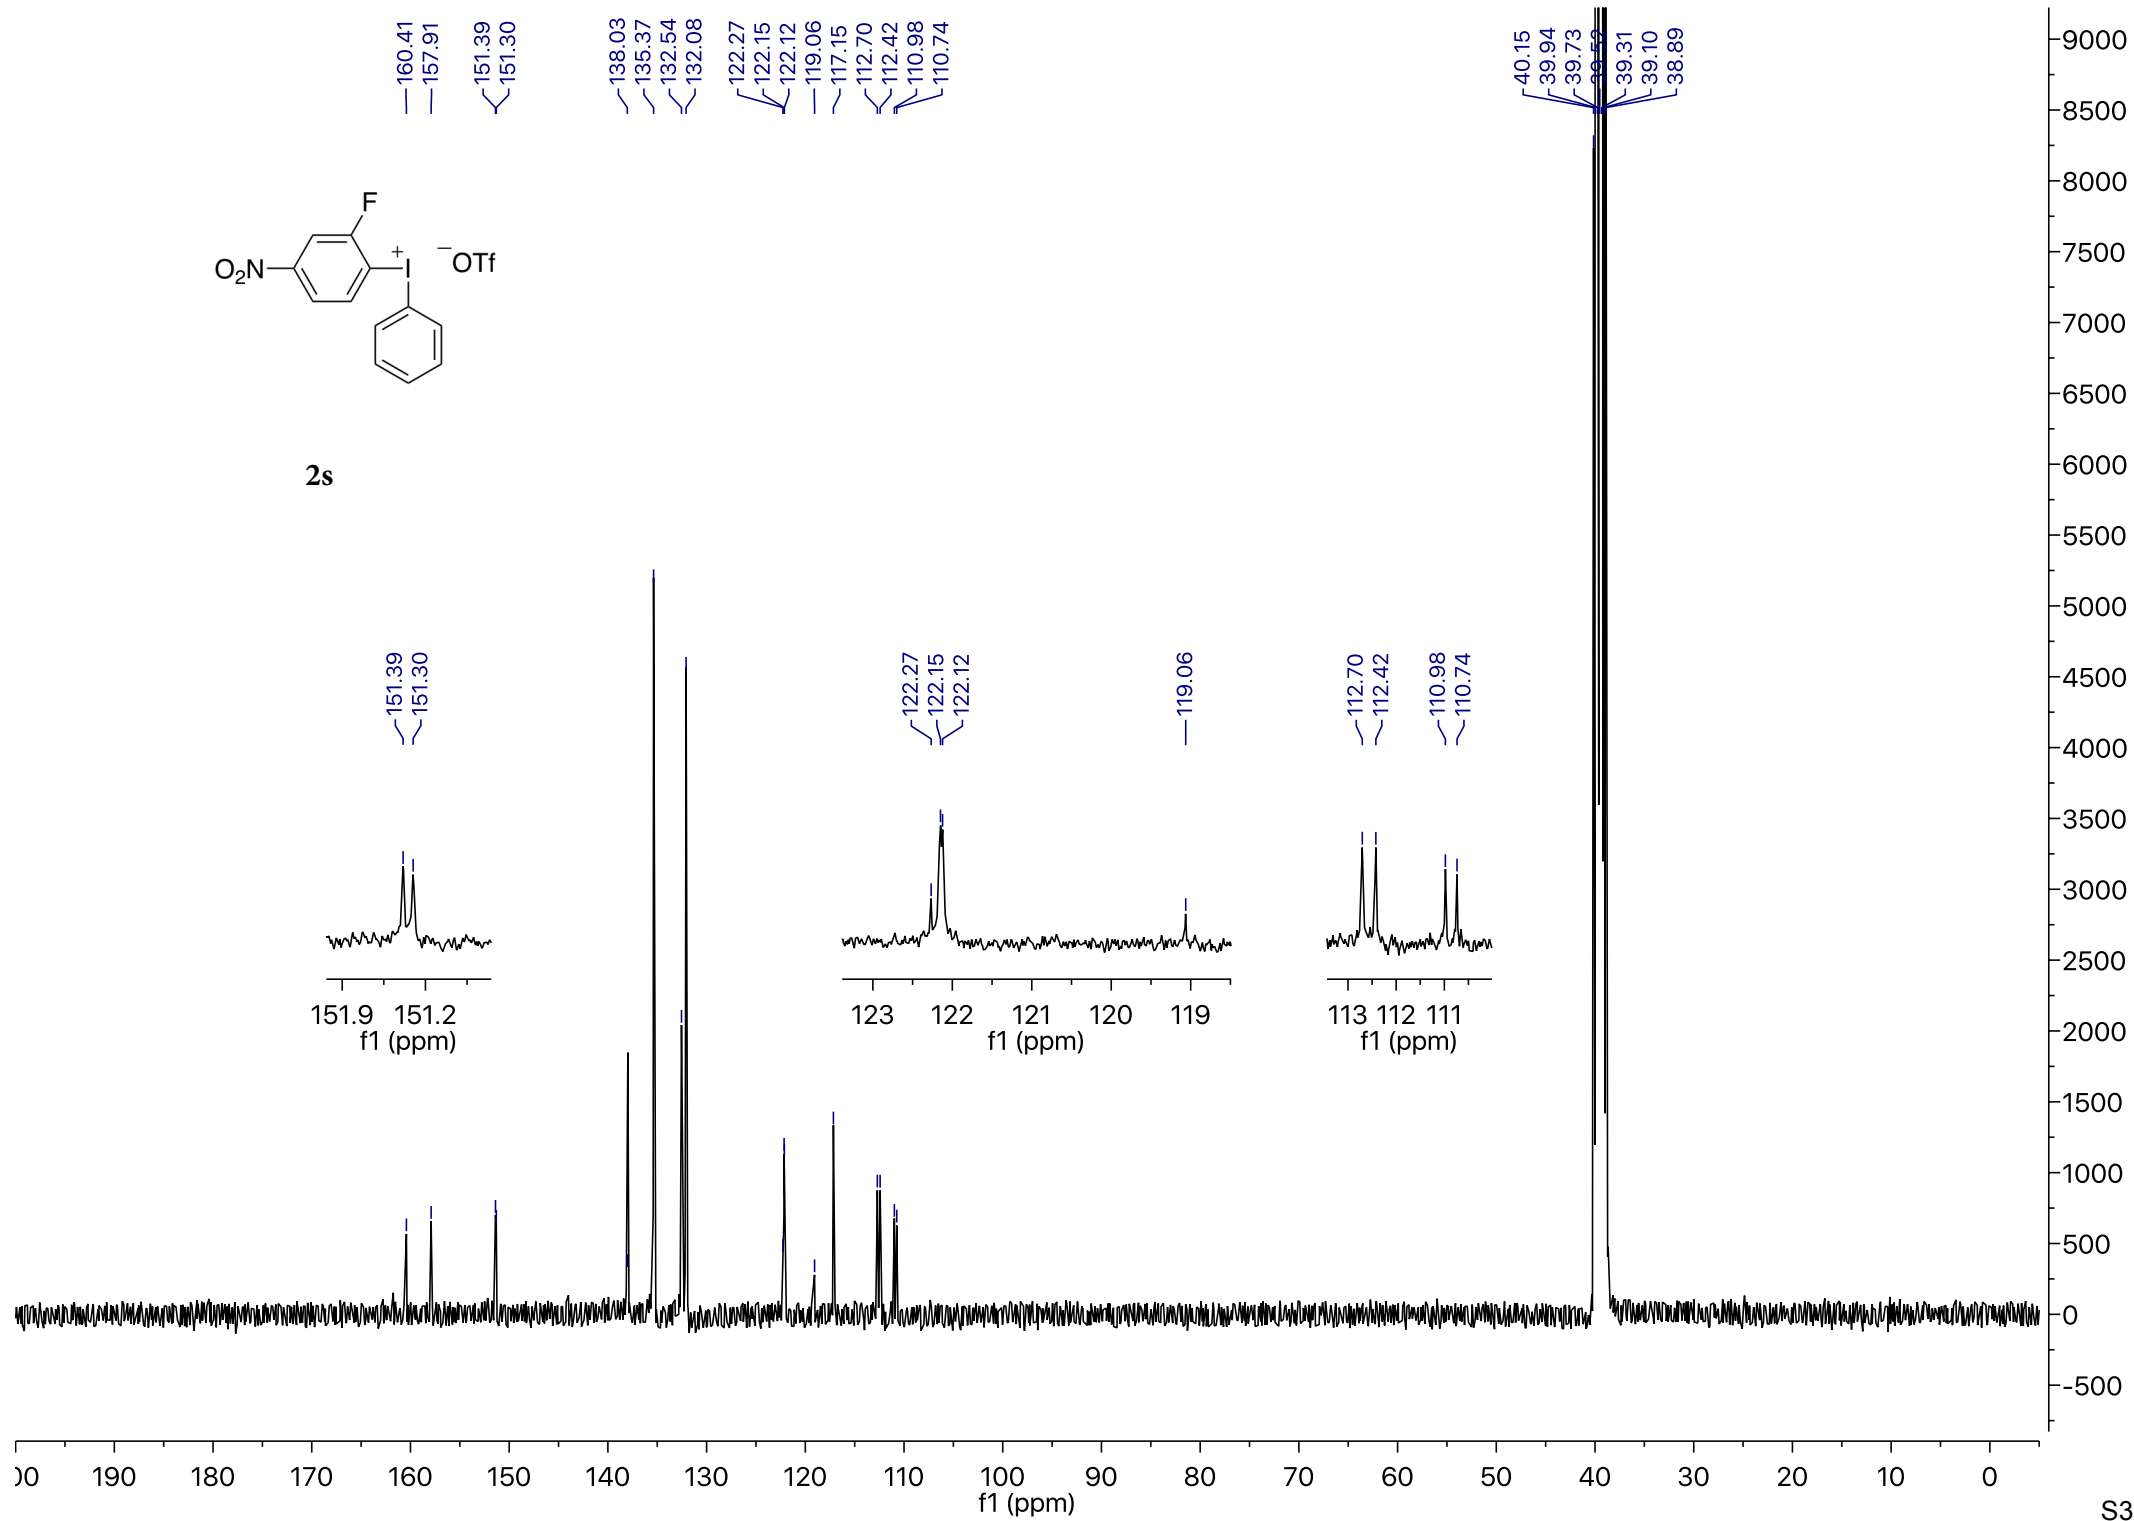

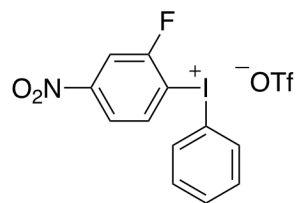

2s

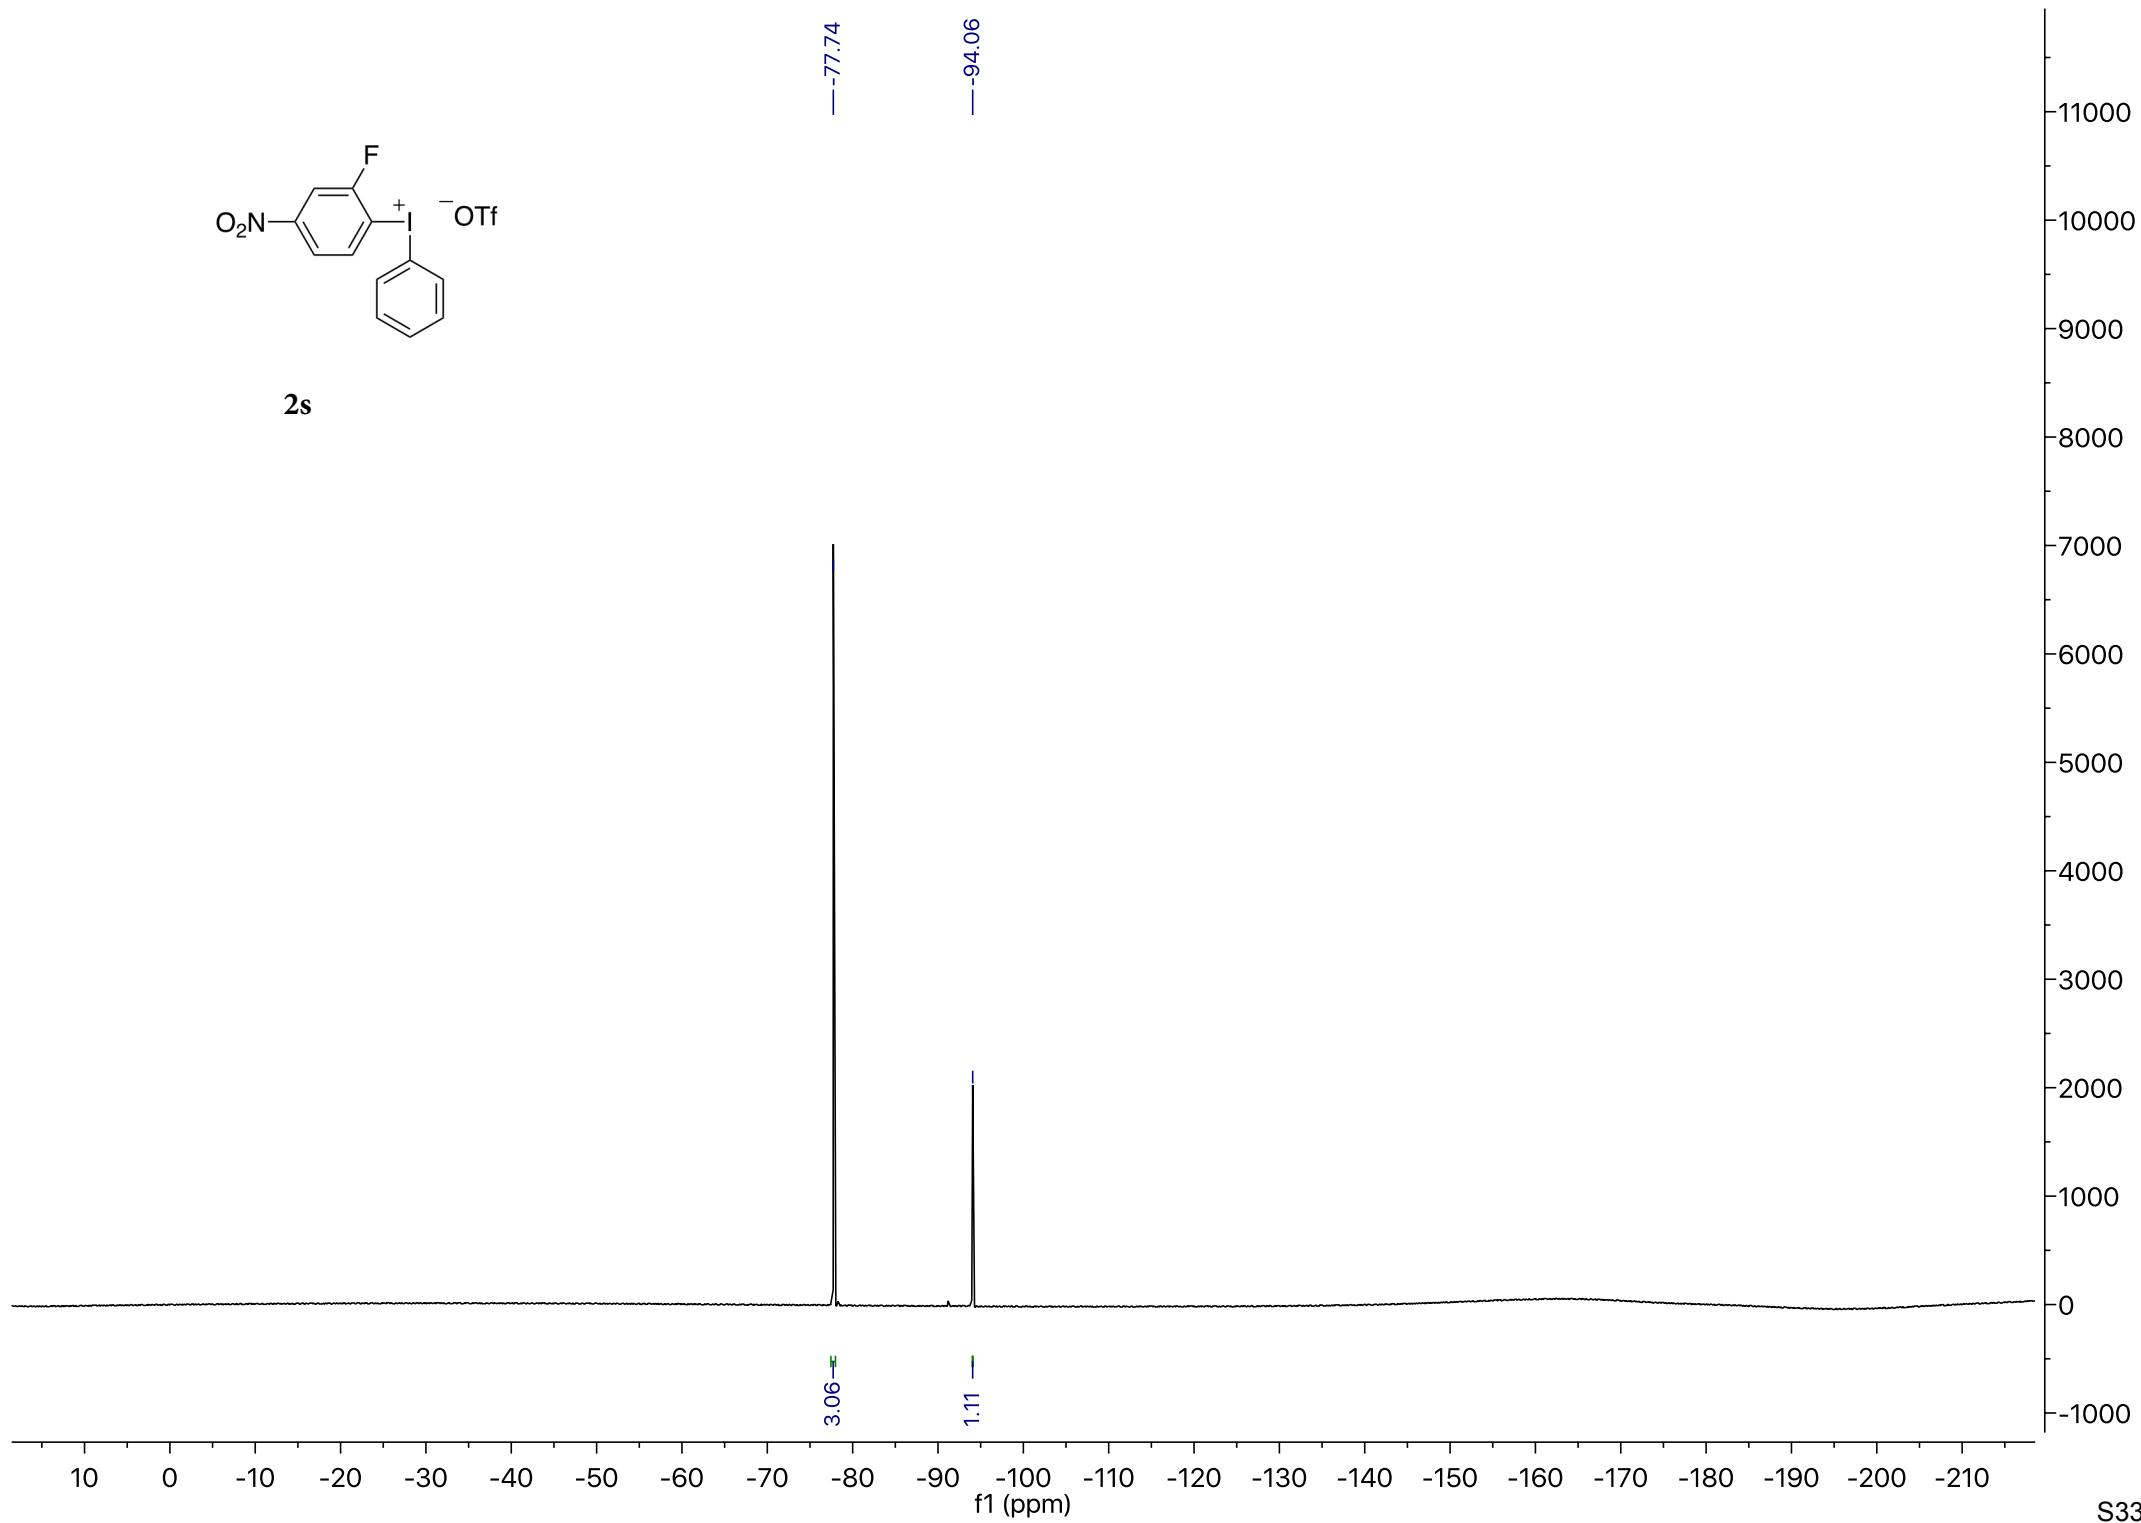

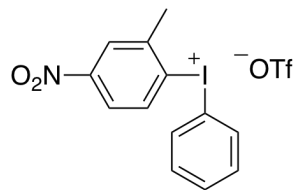

2t

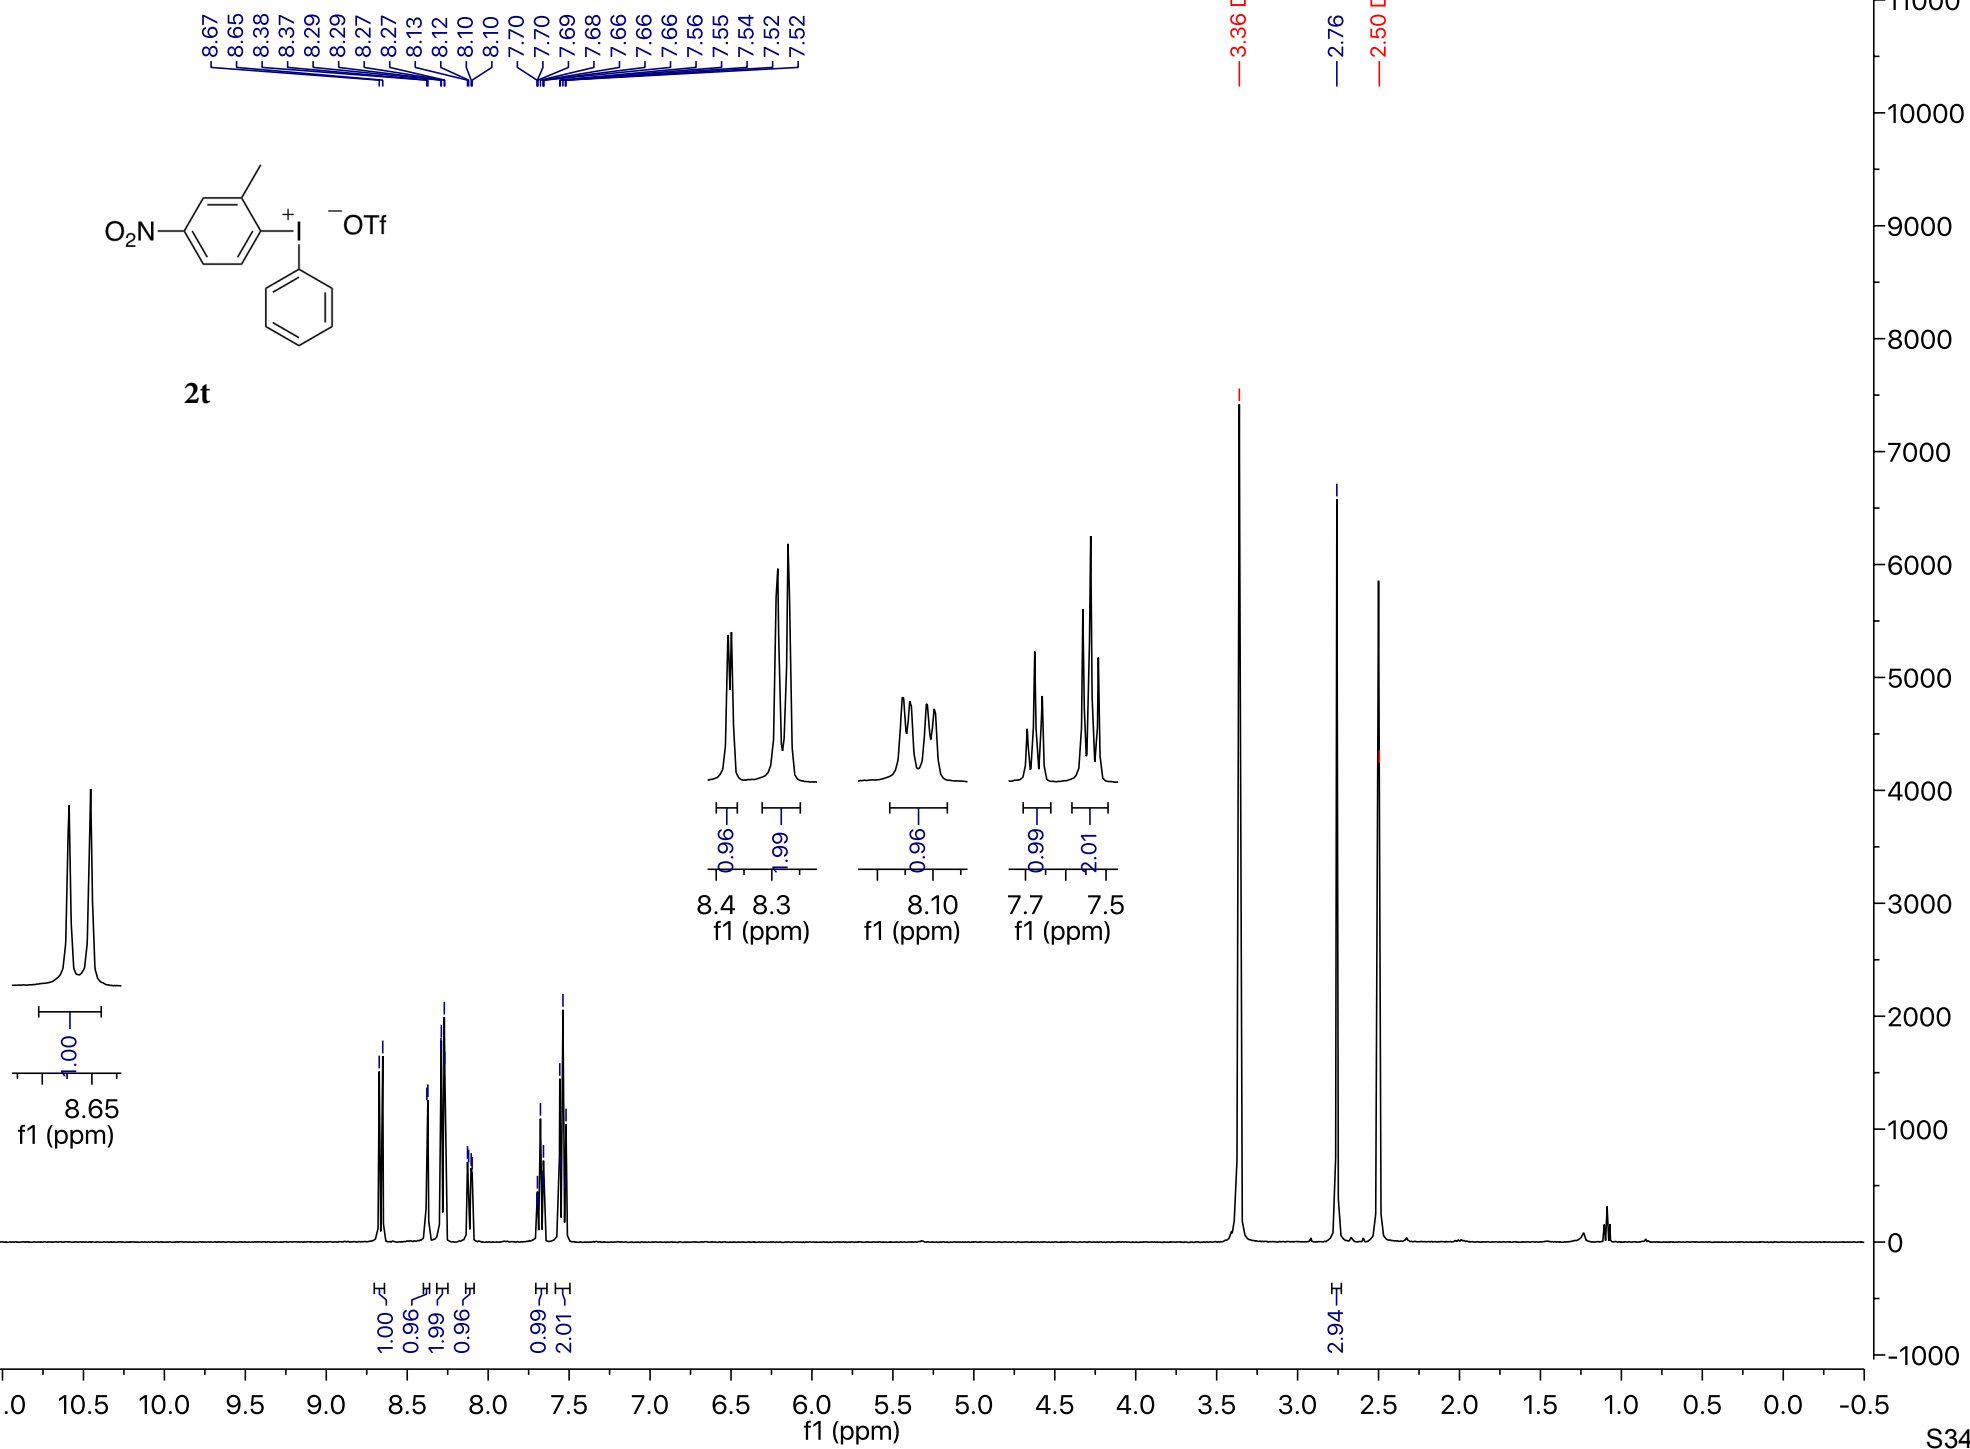

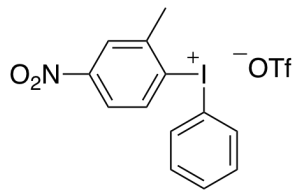

2t

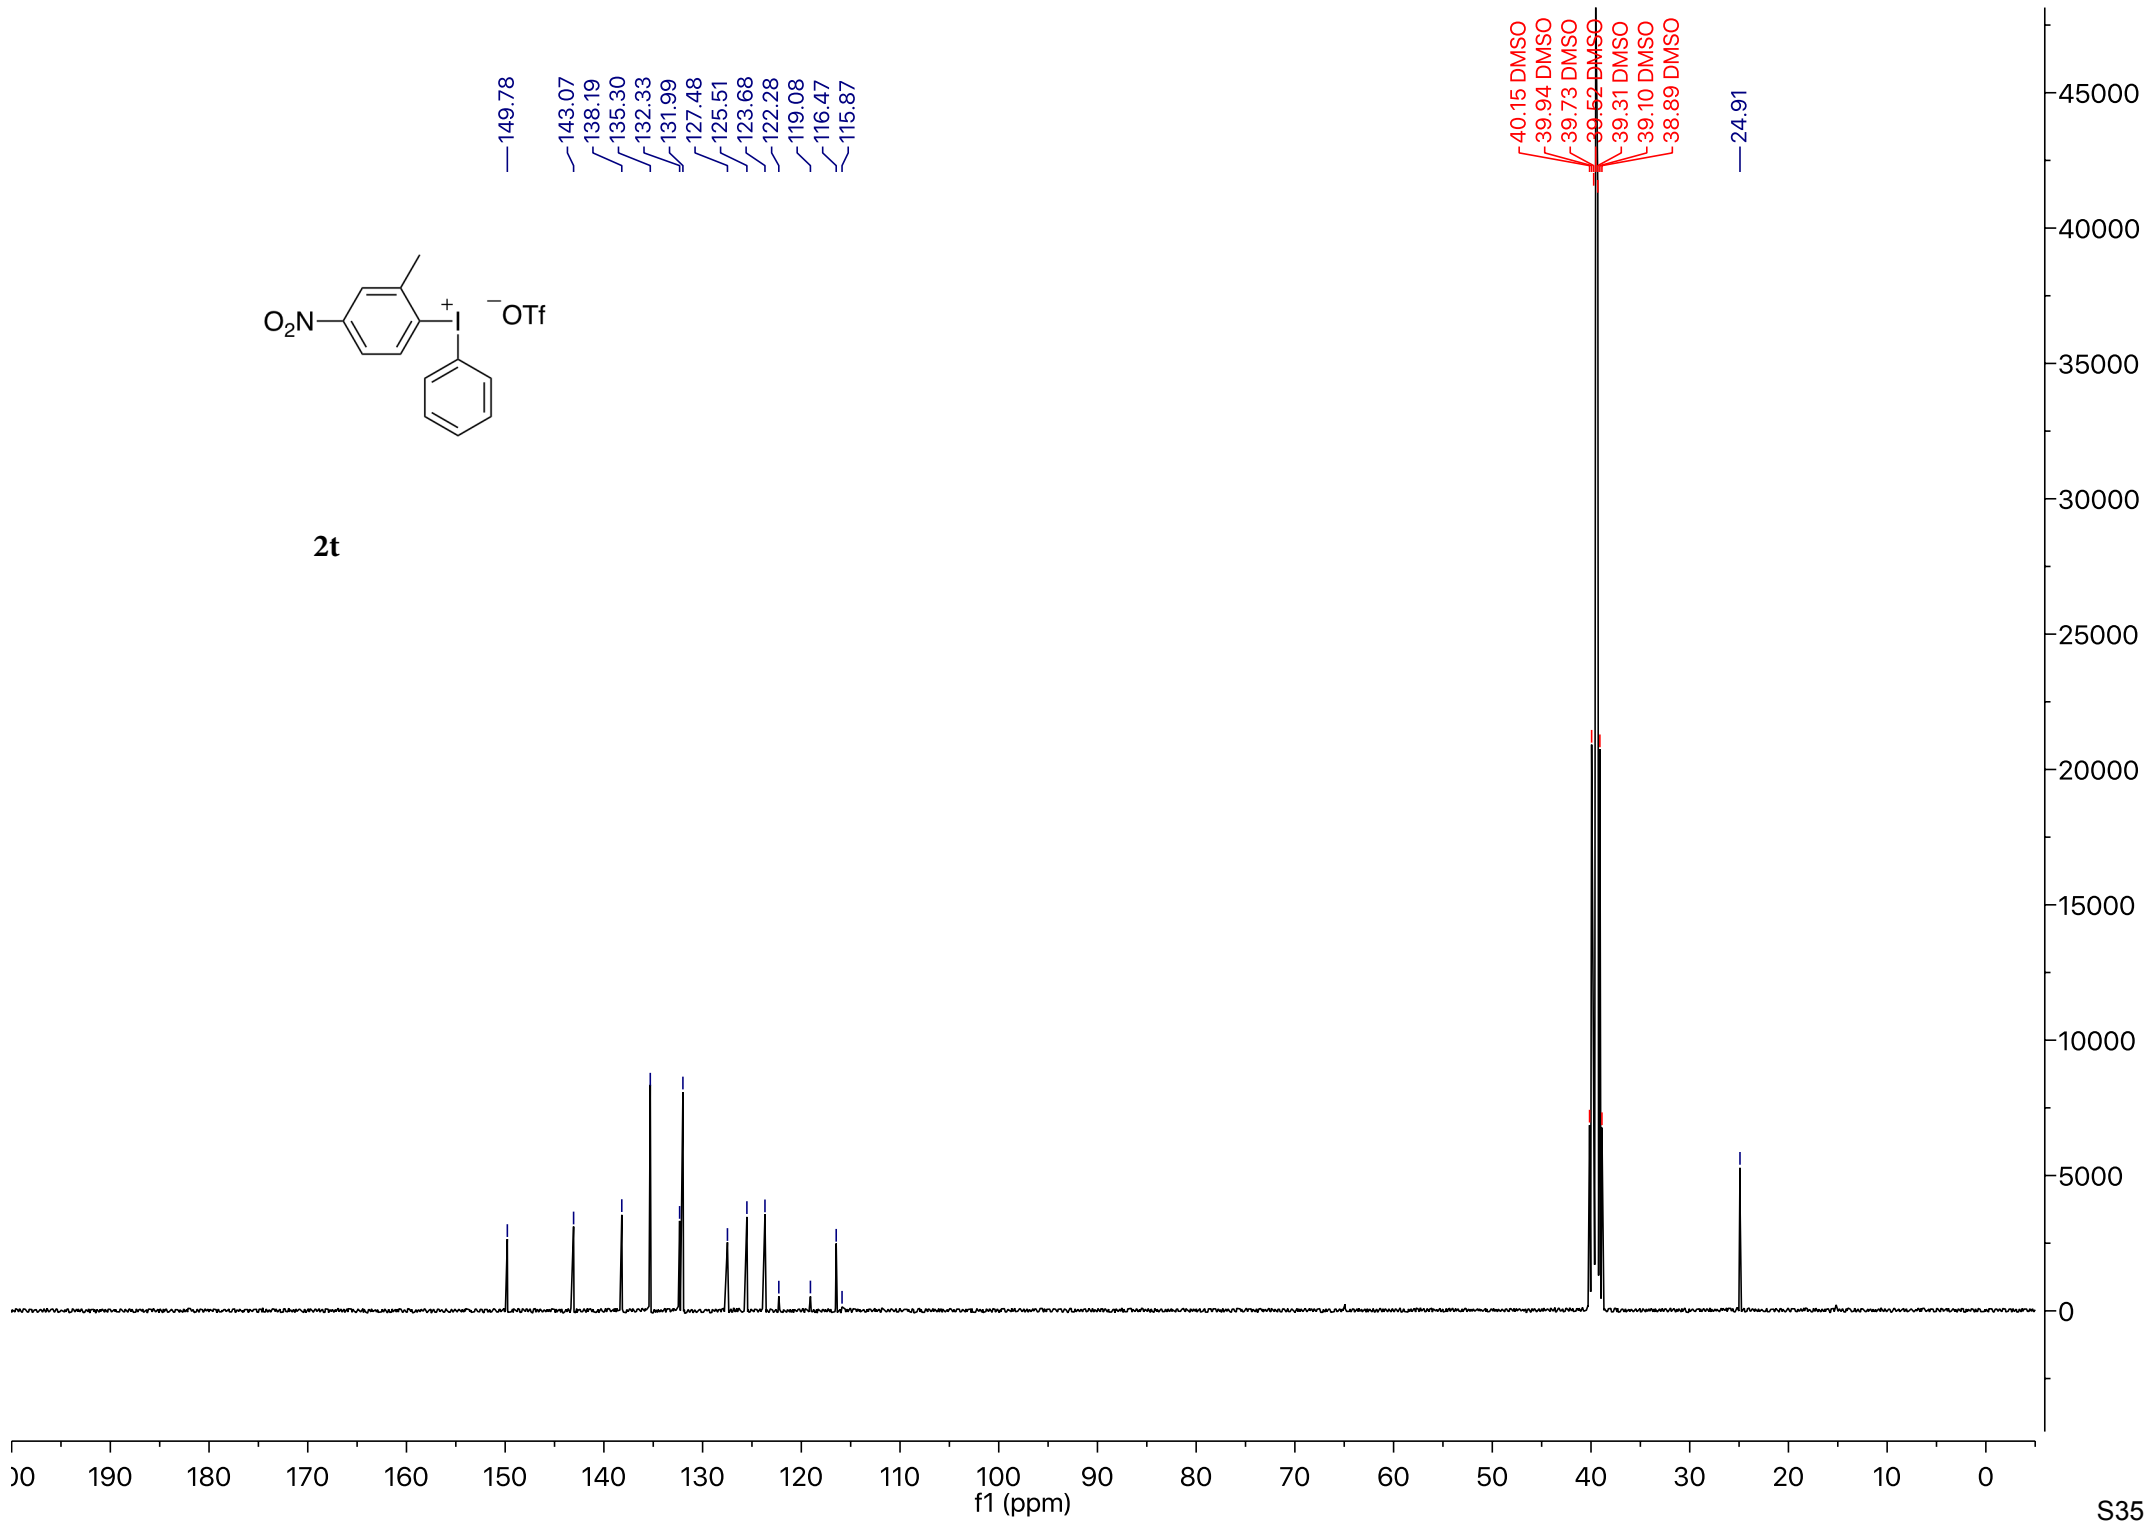



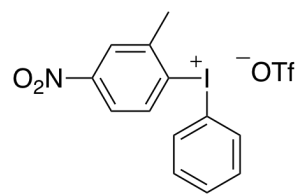

2t

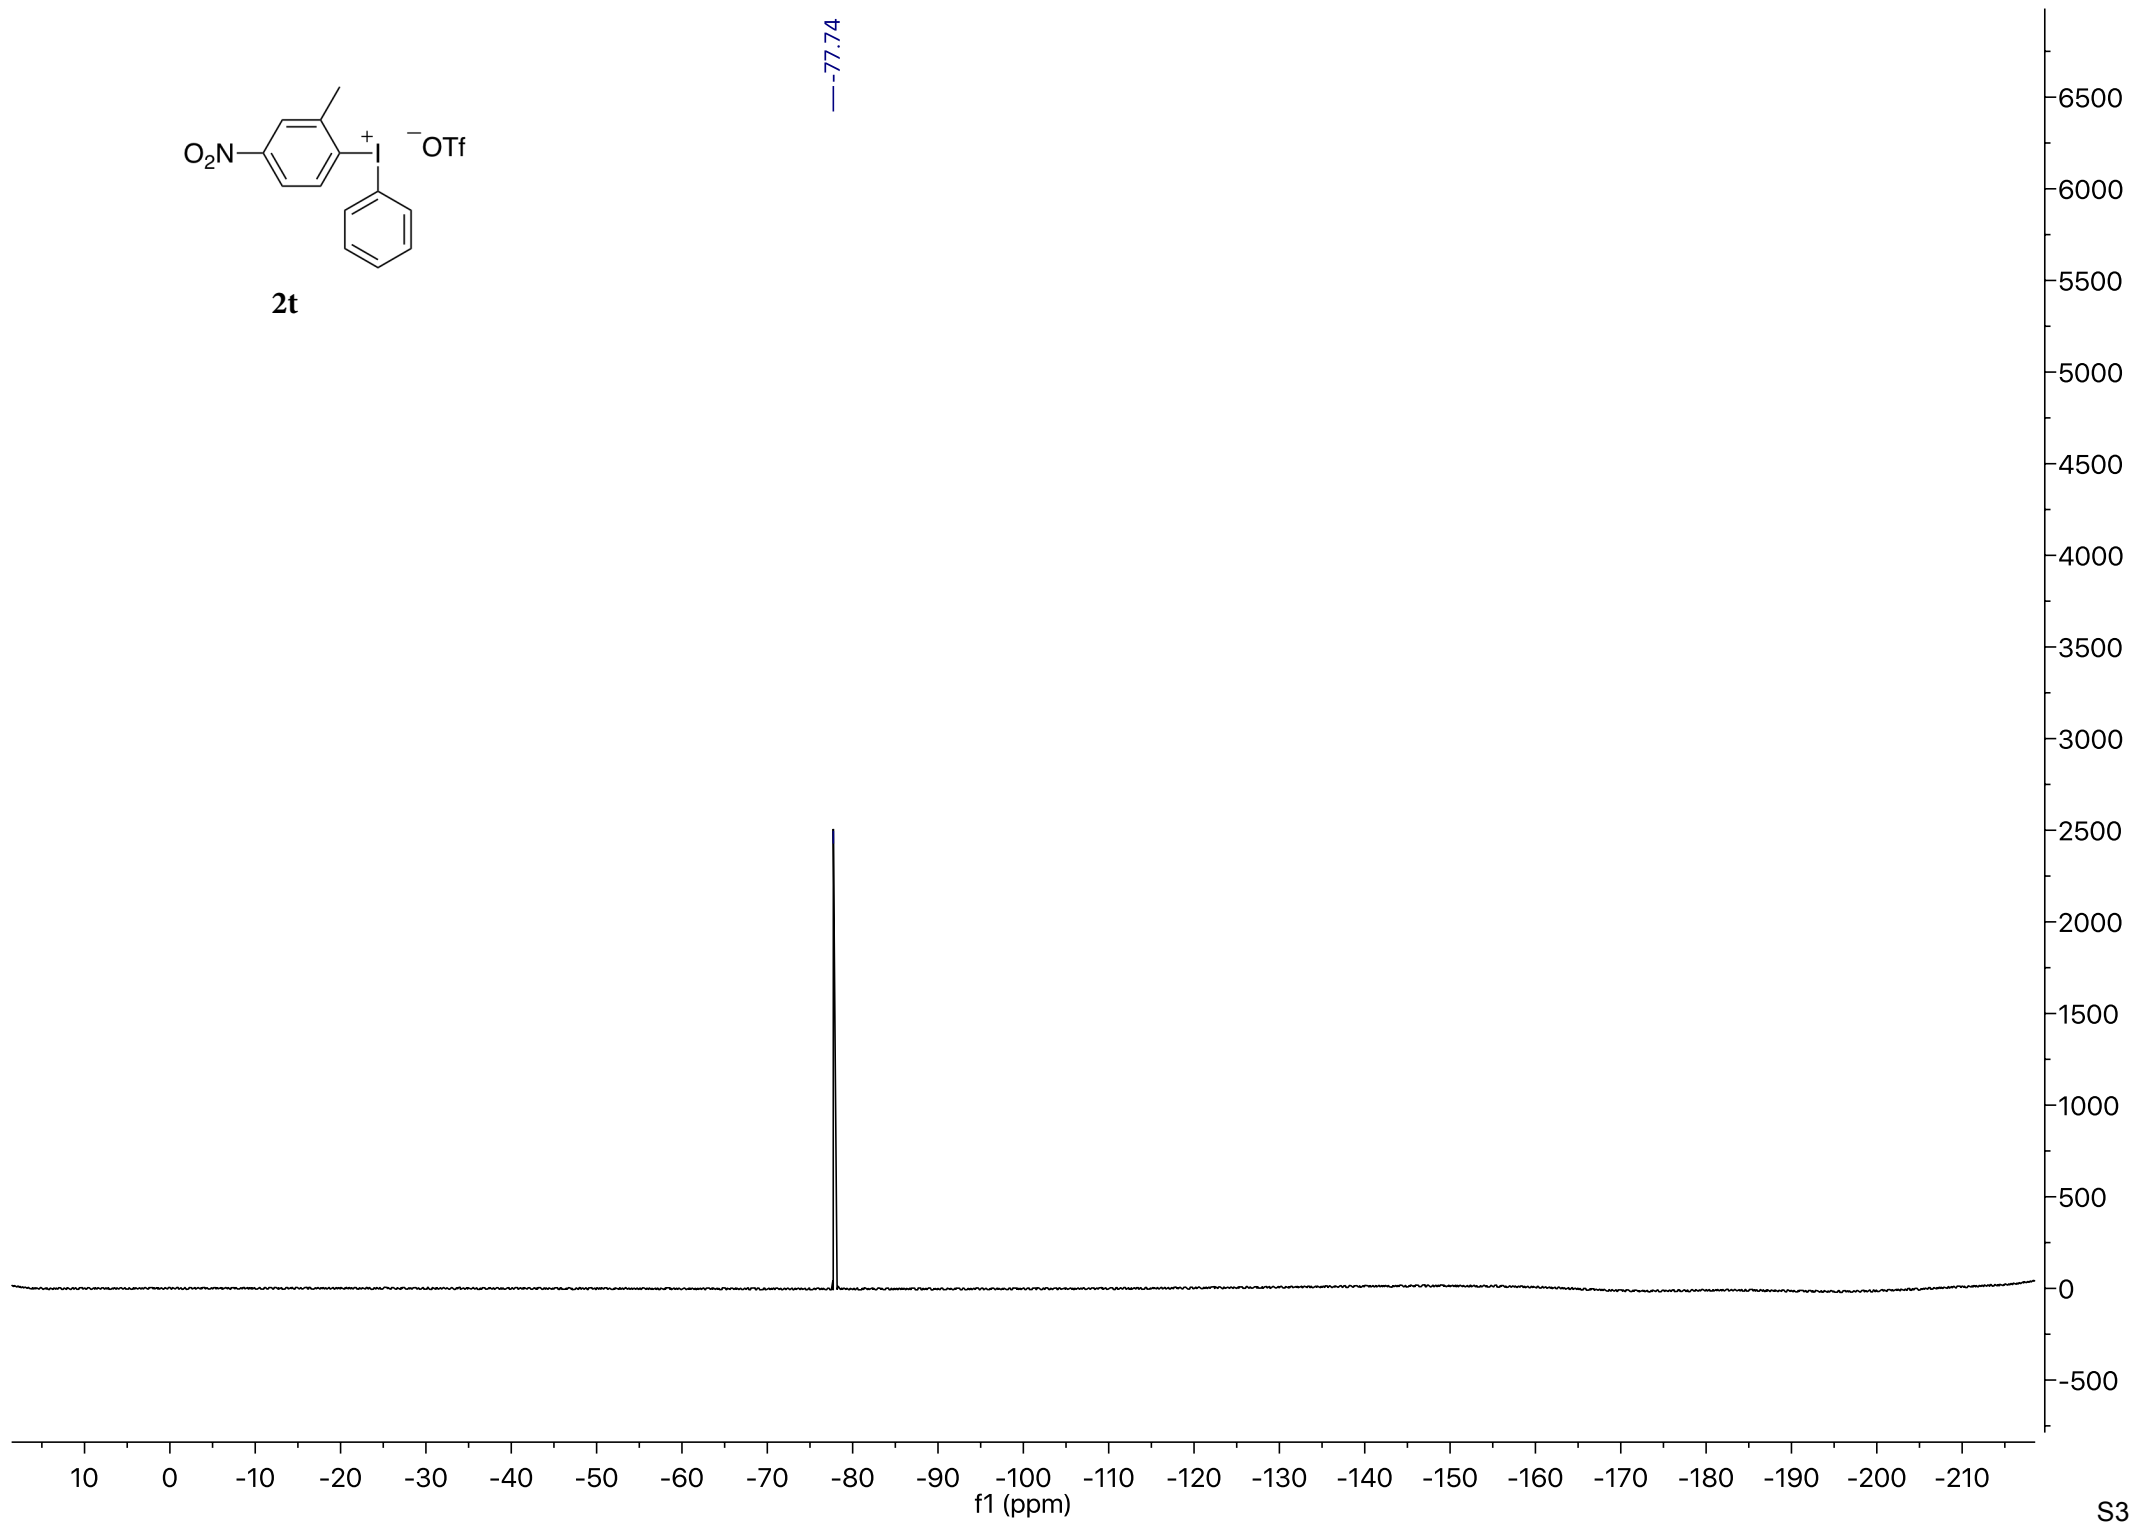

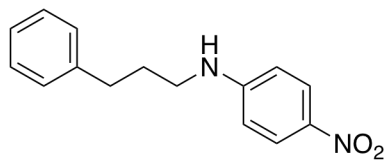

**3a**

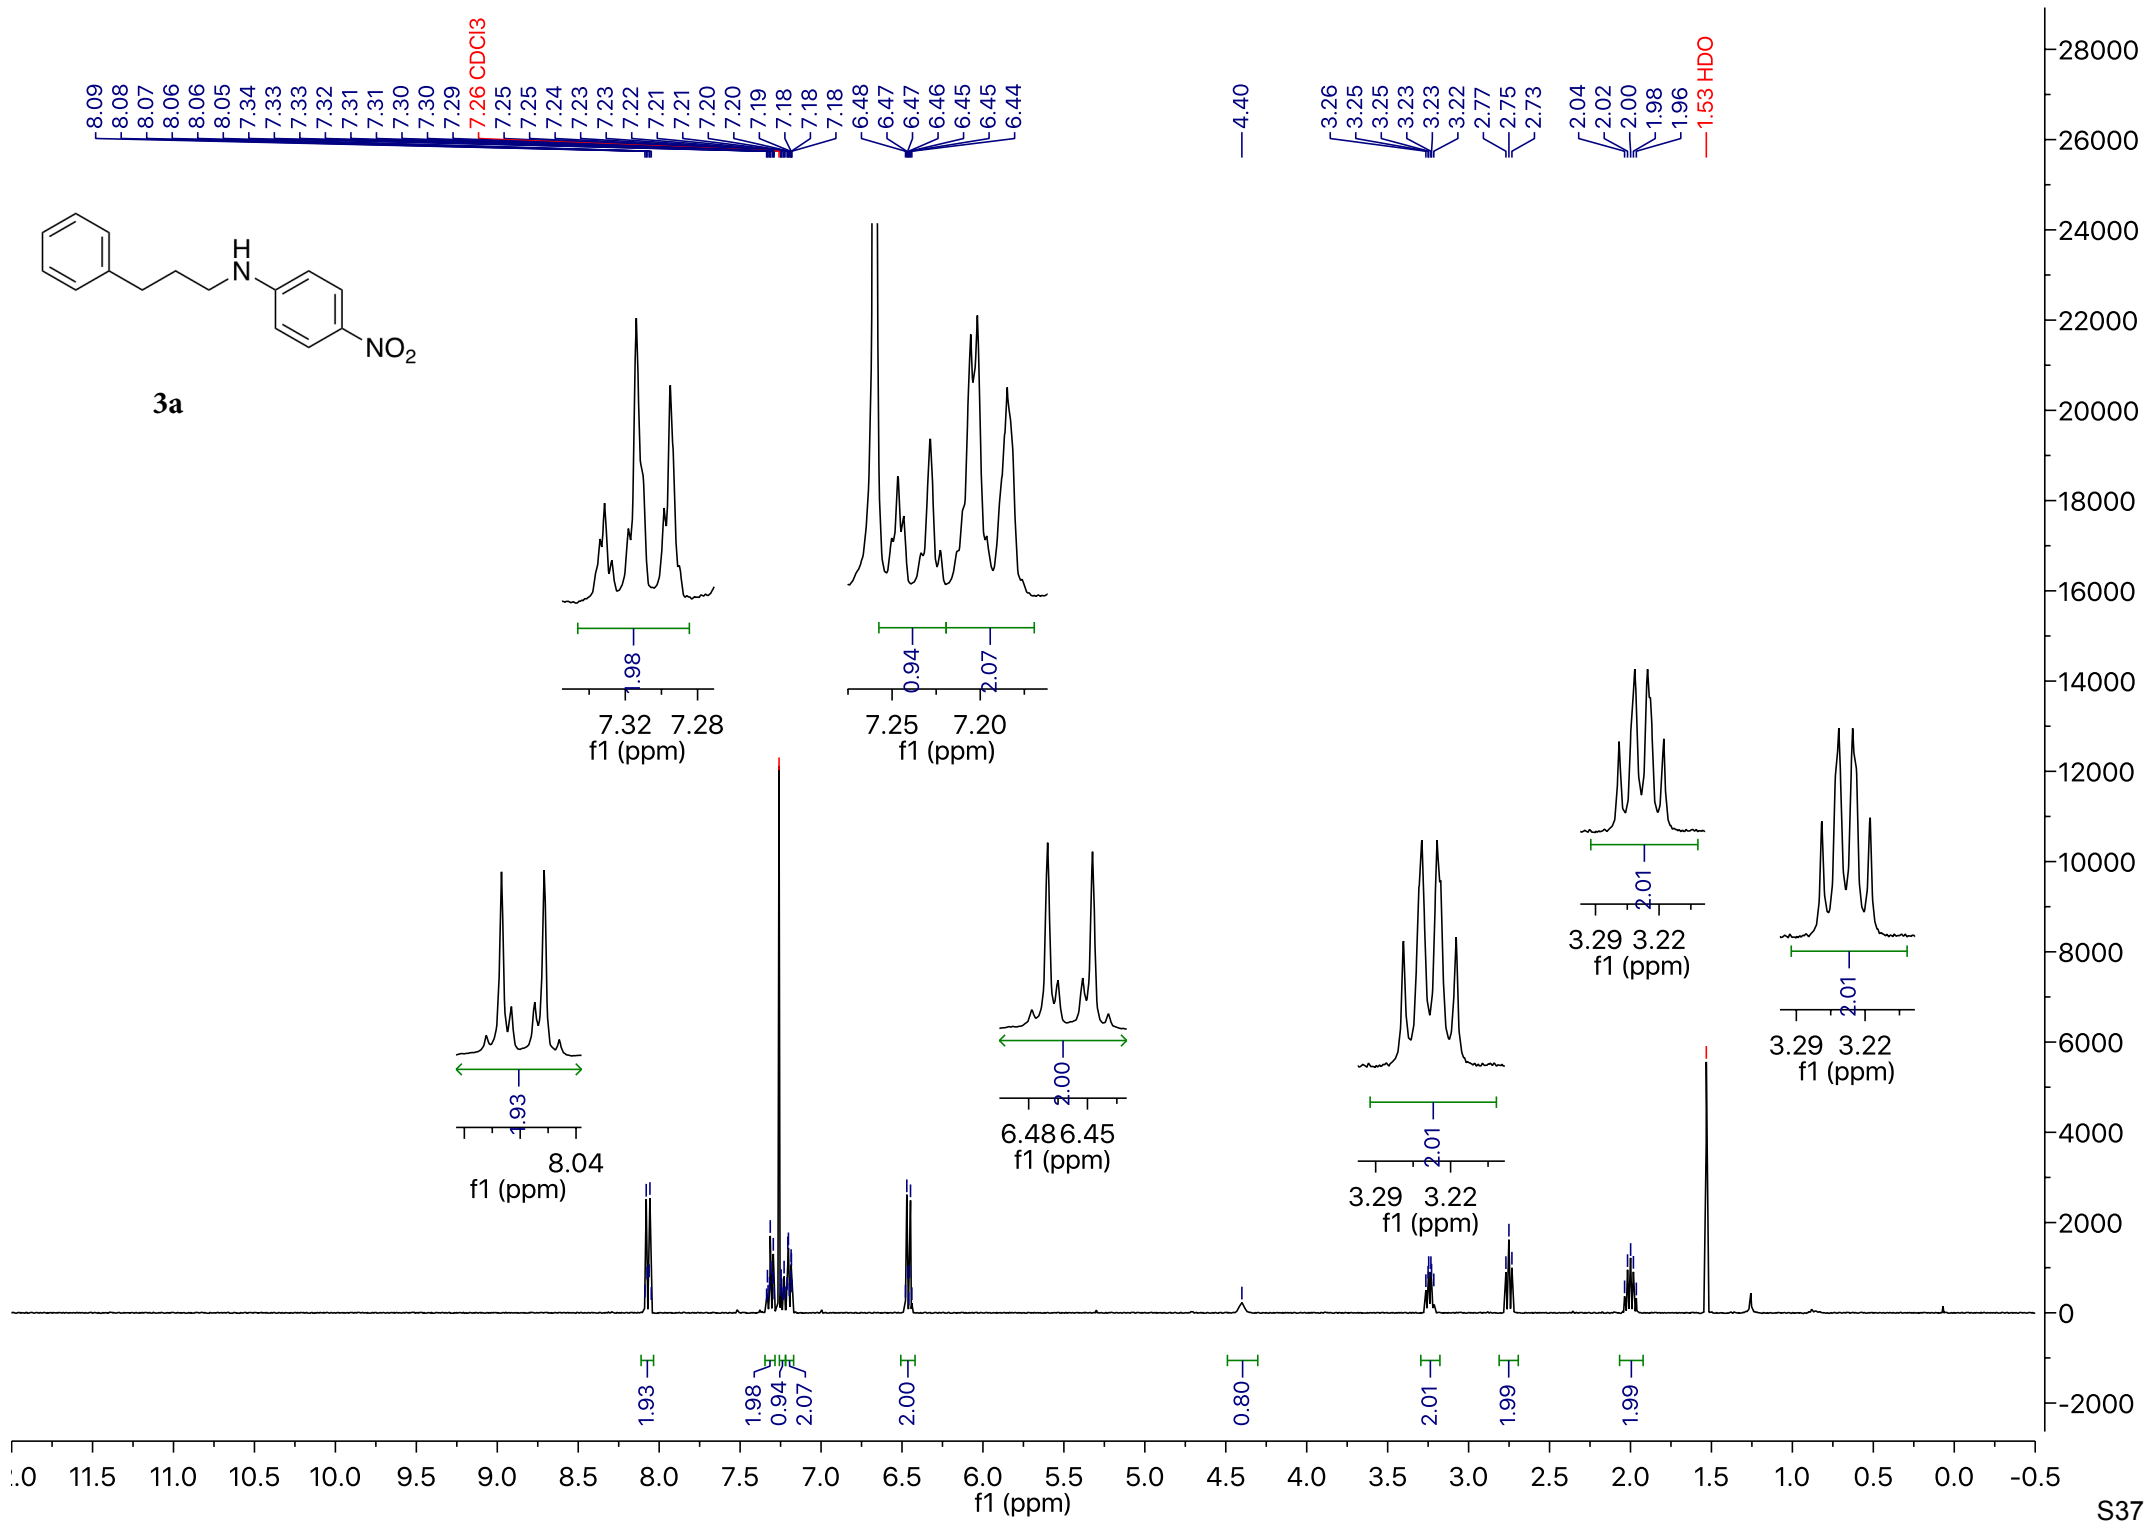

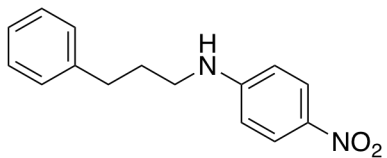

3a

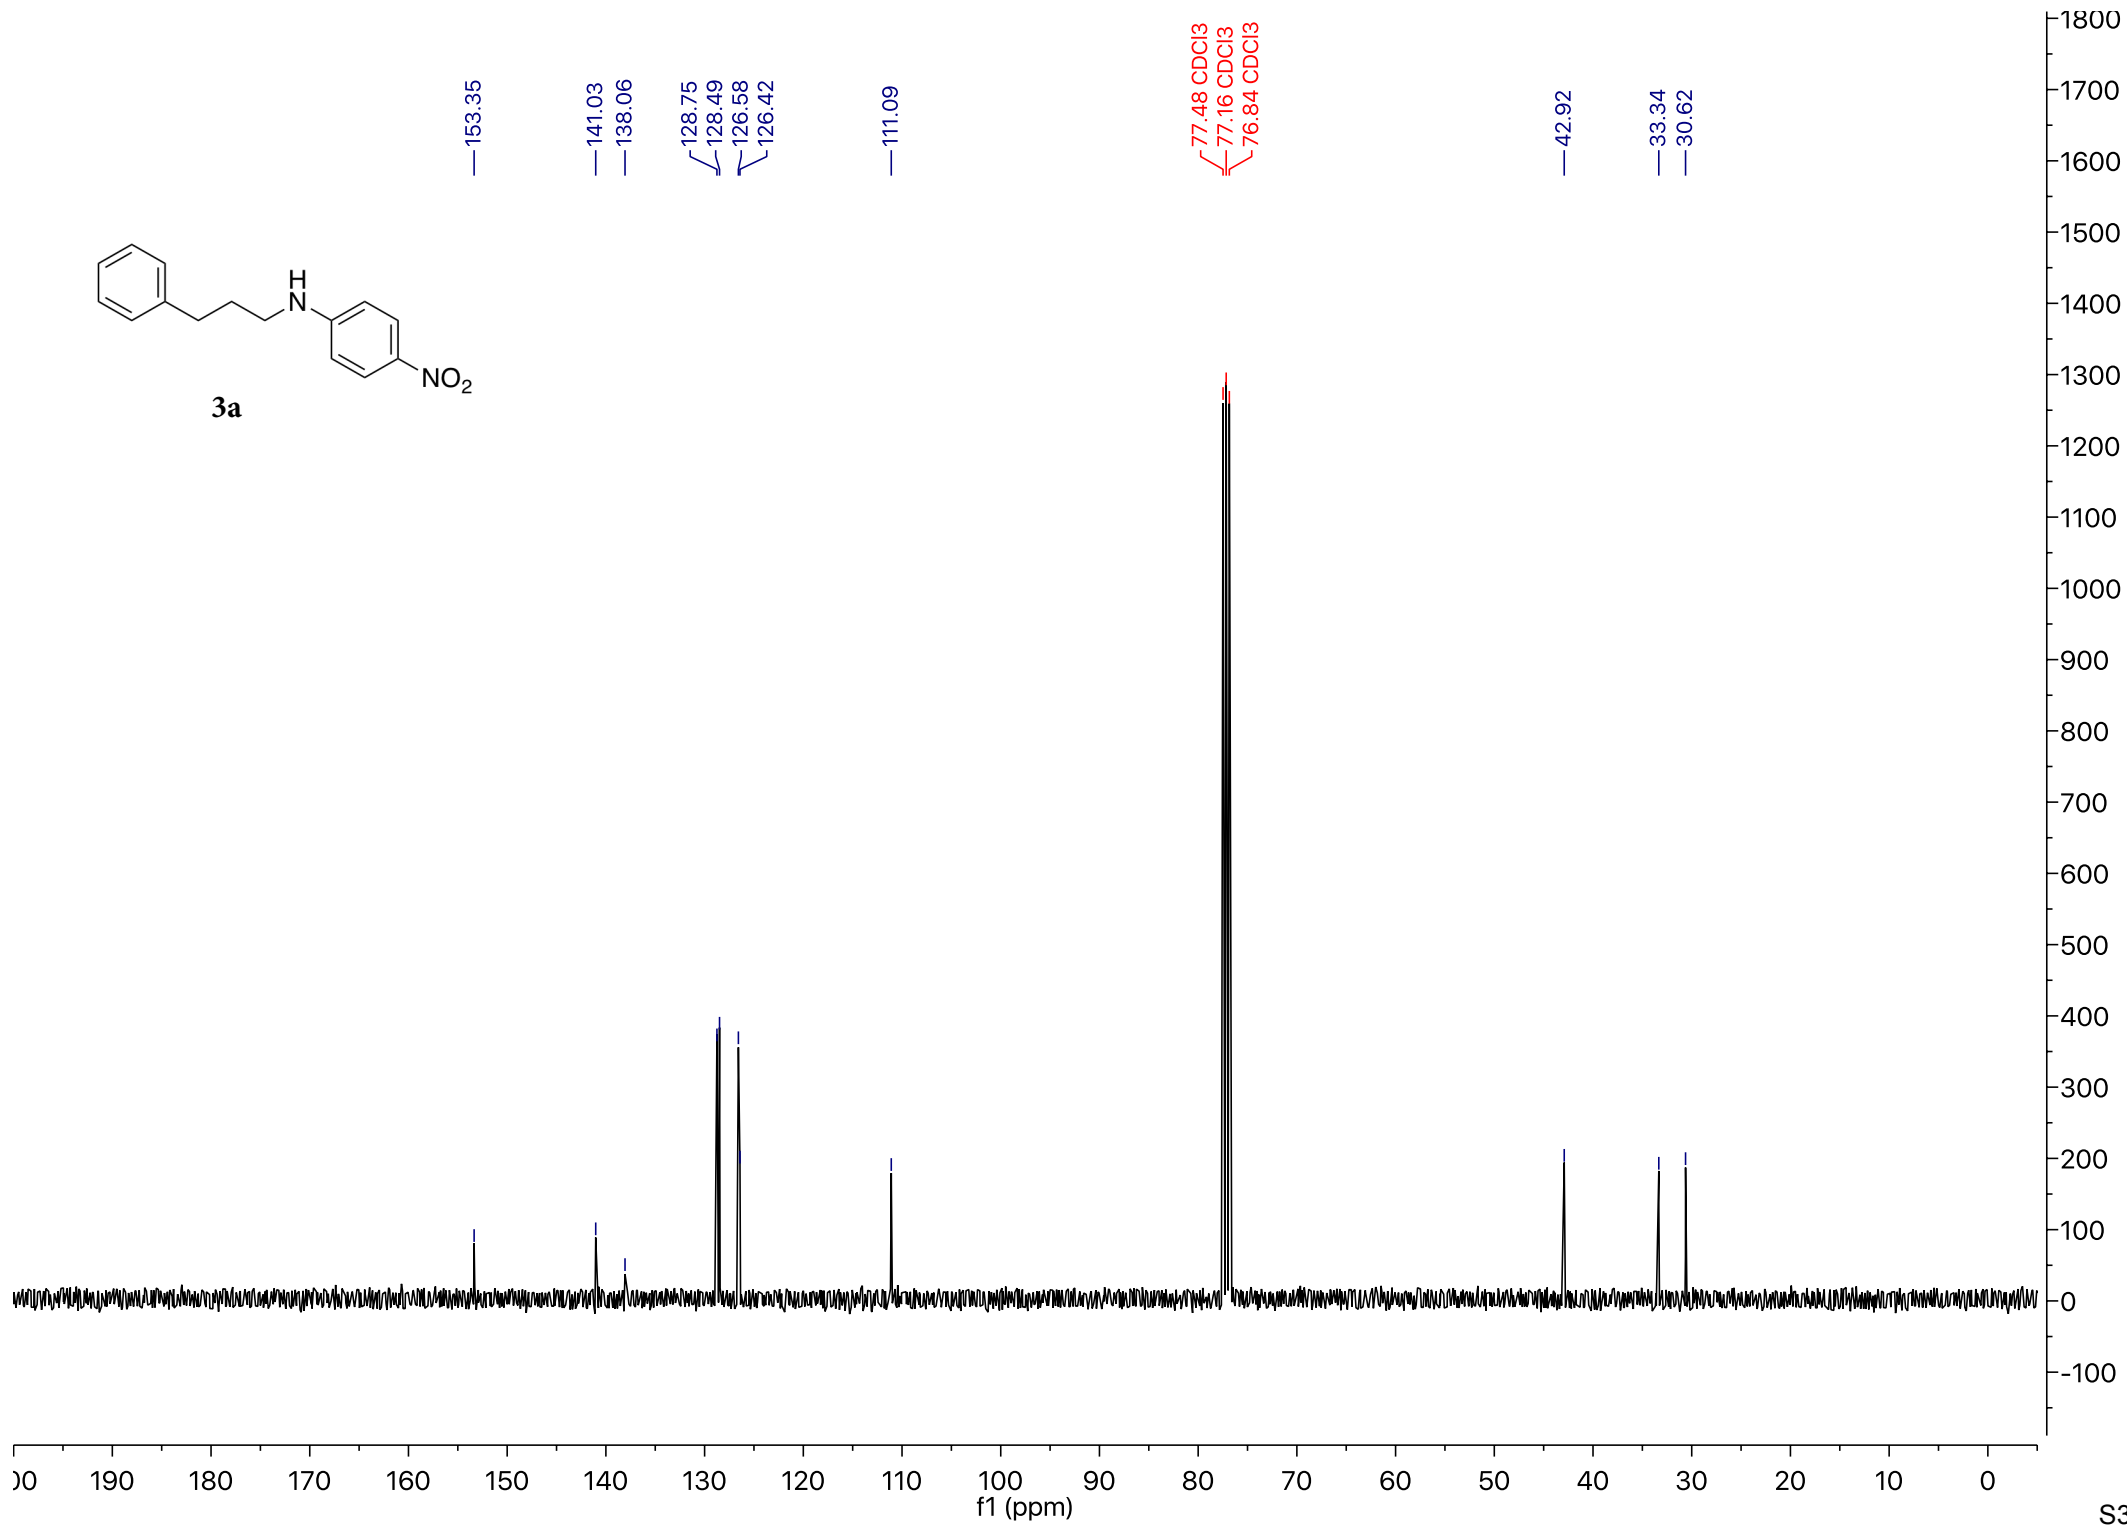

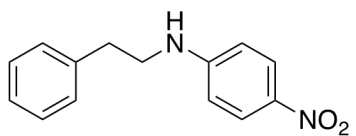

**3b**

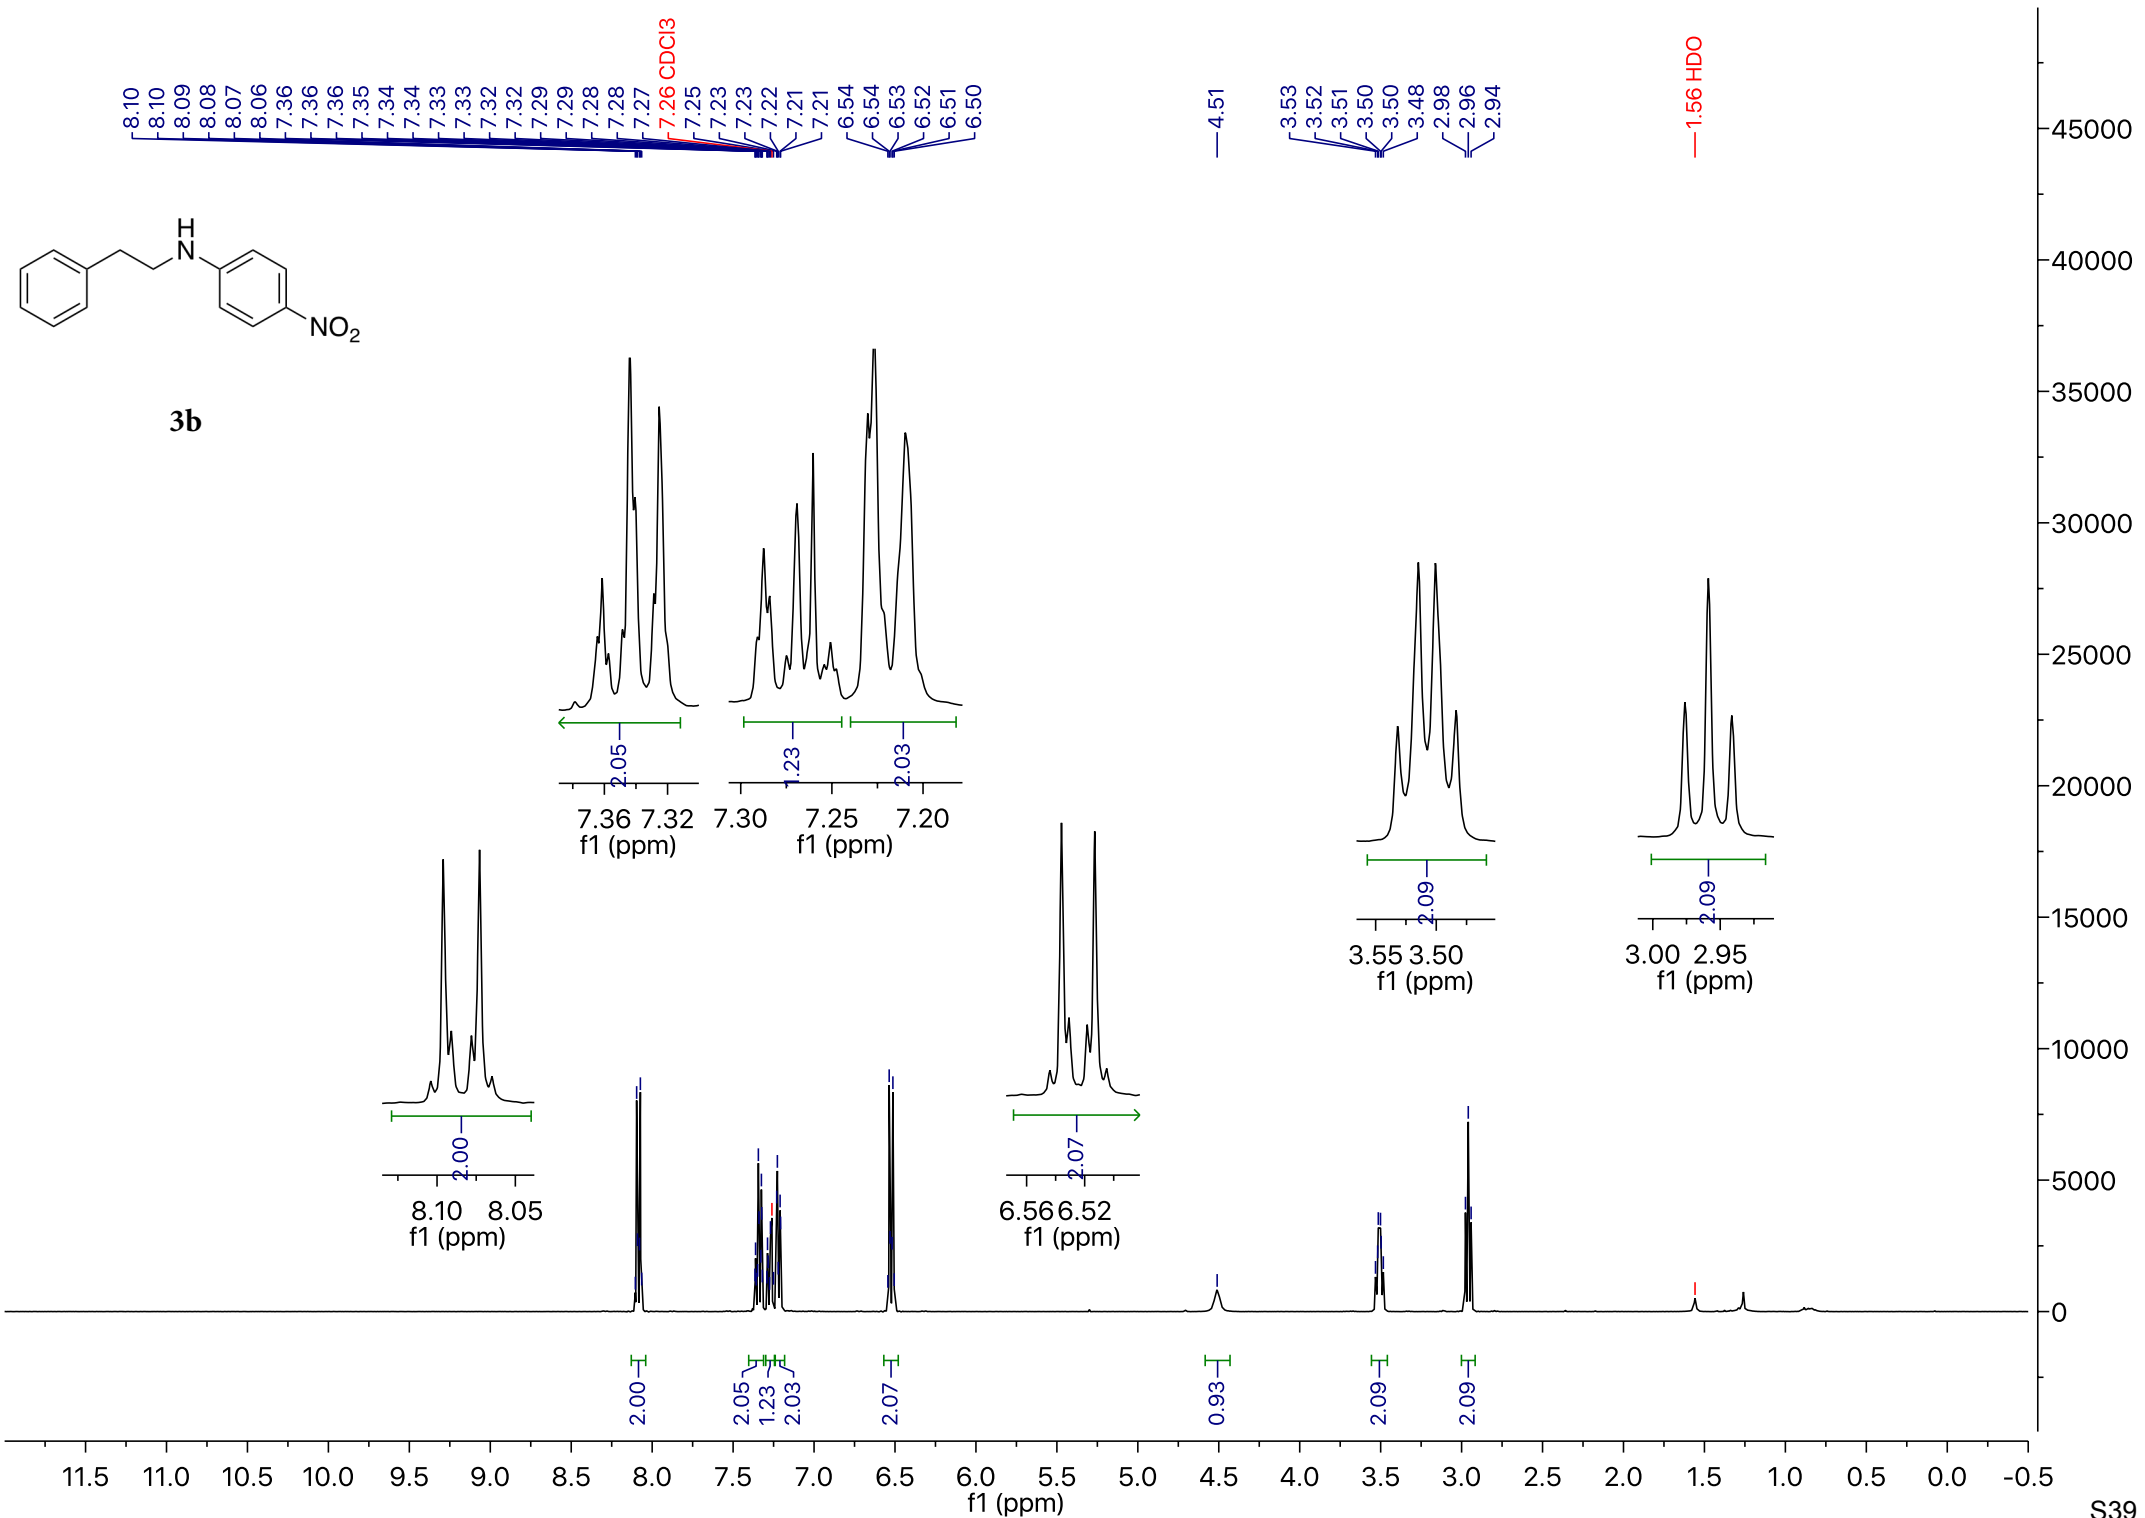

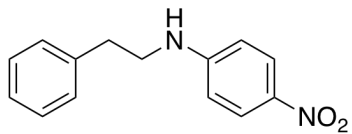

**3b**

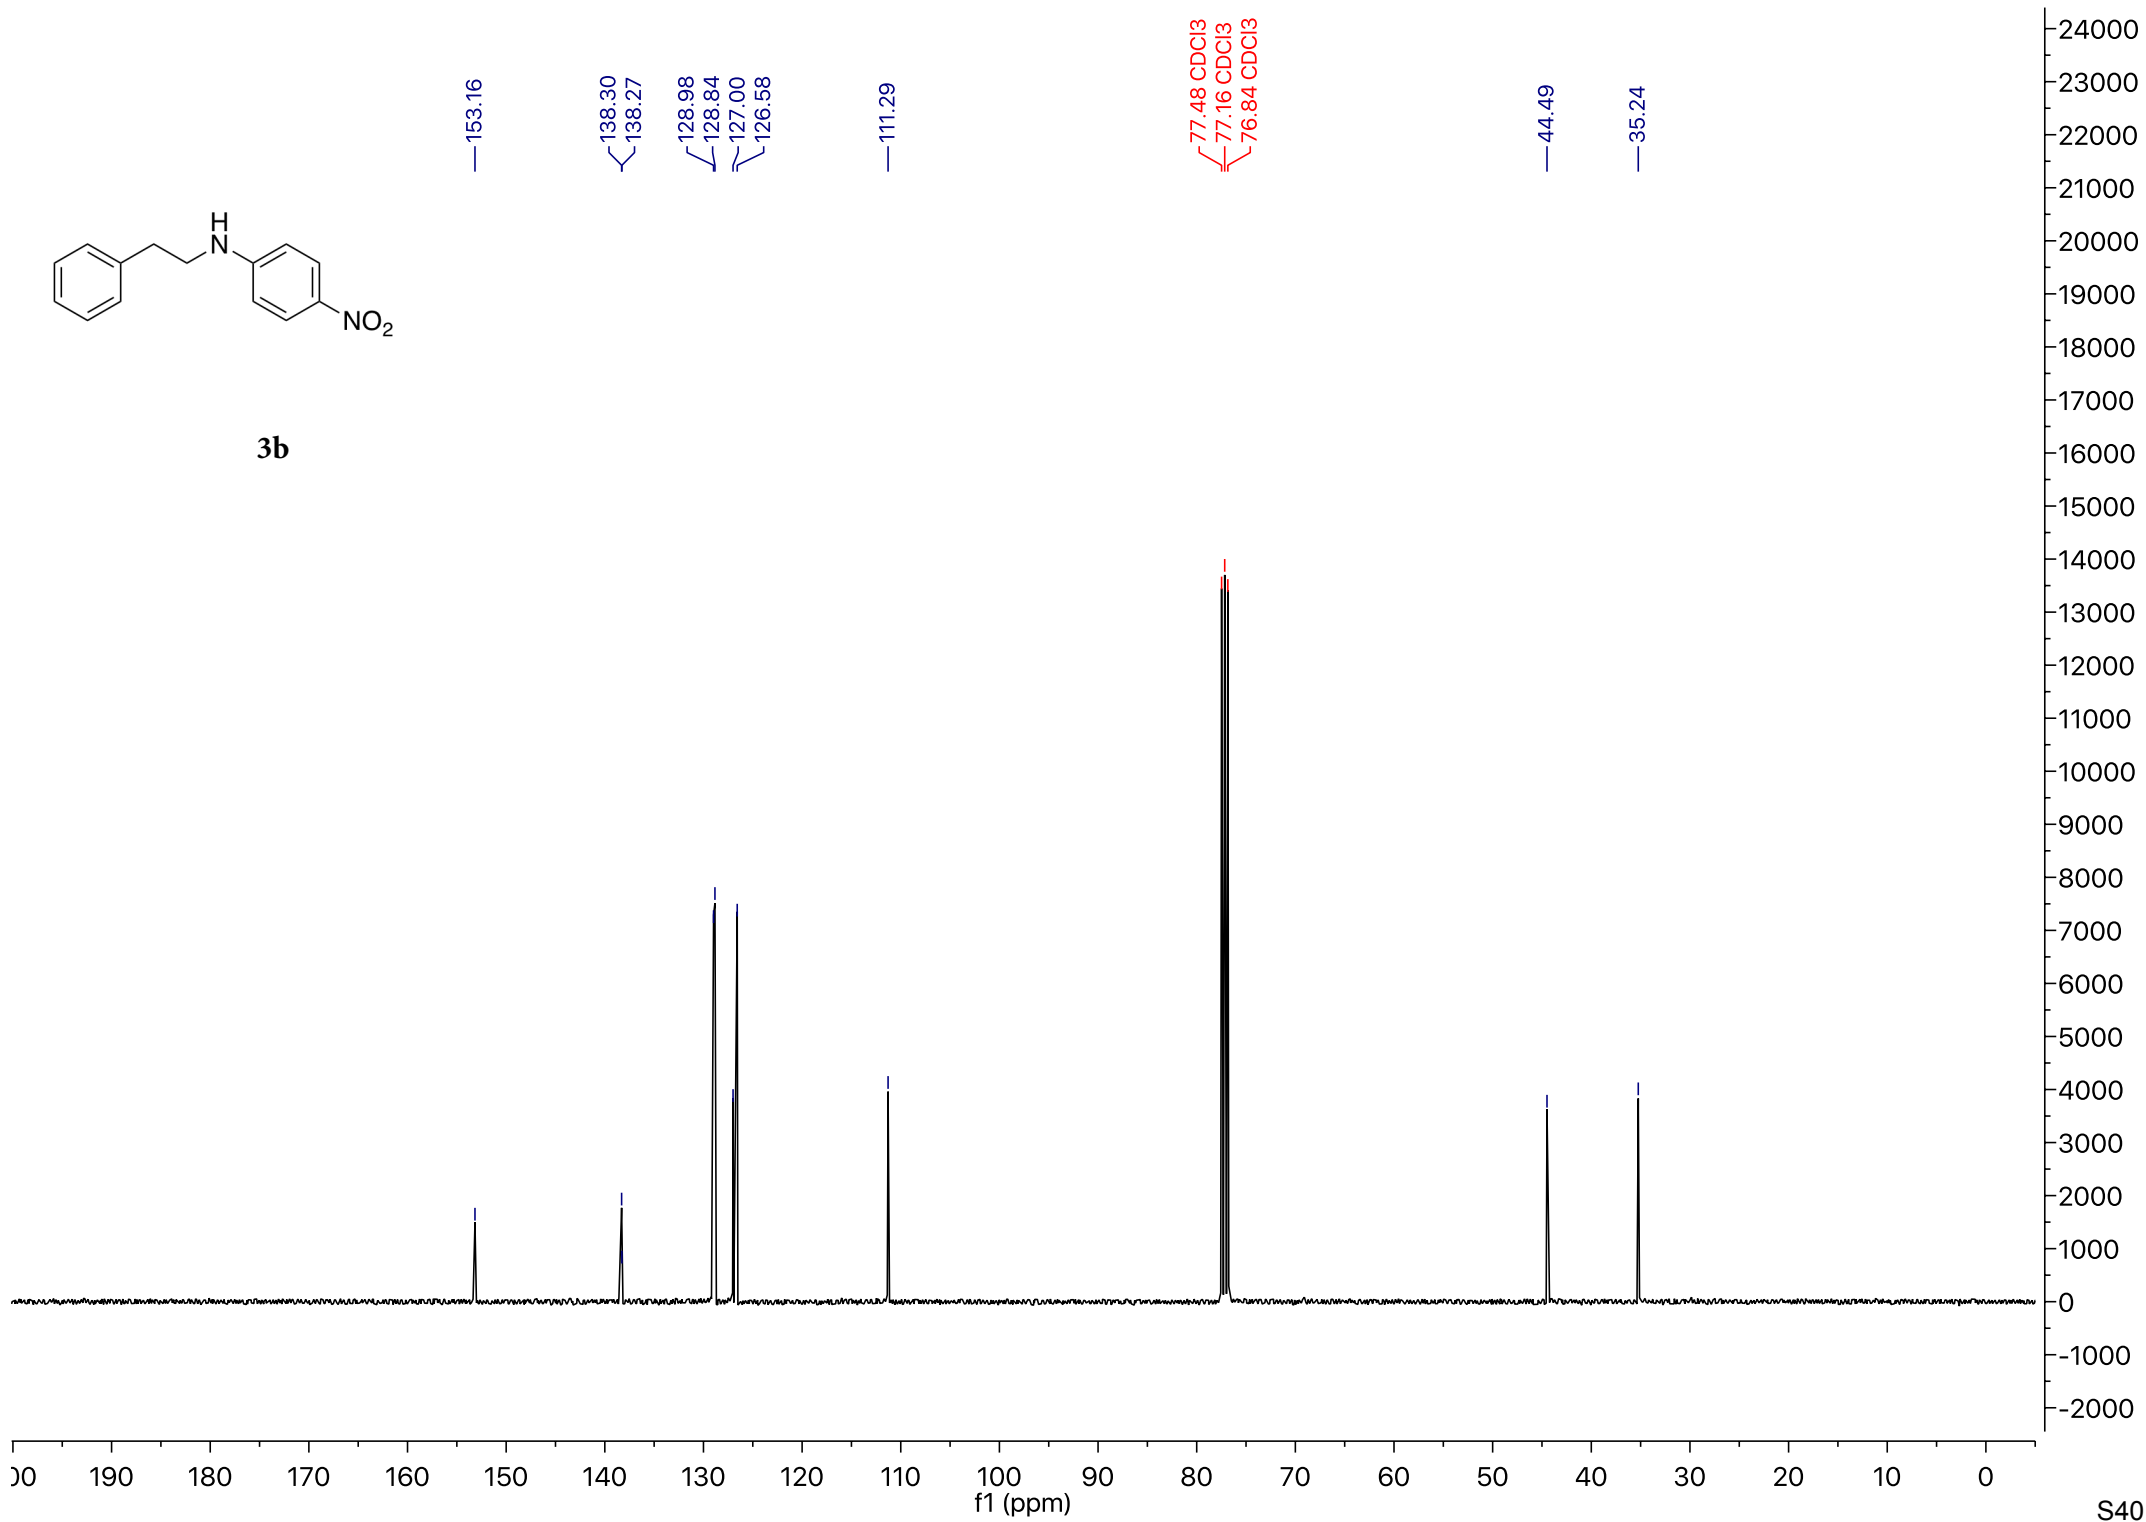

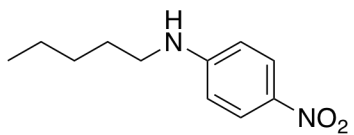

3c

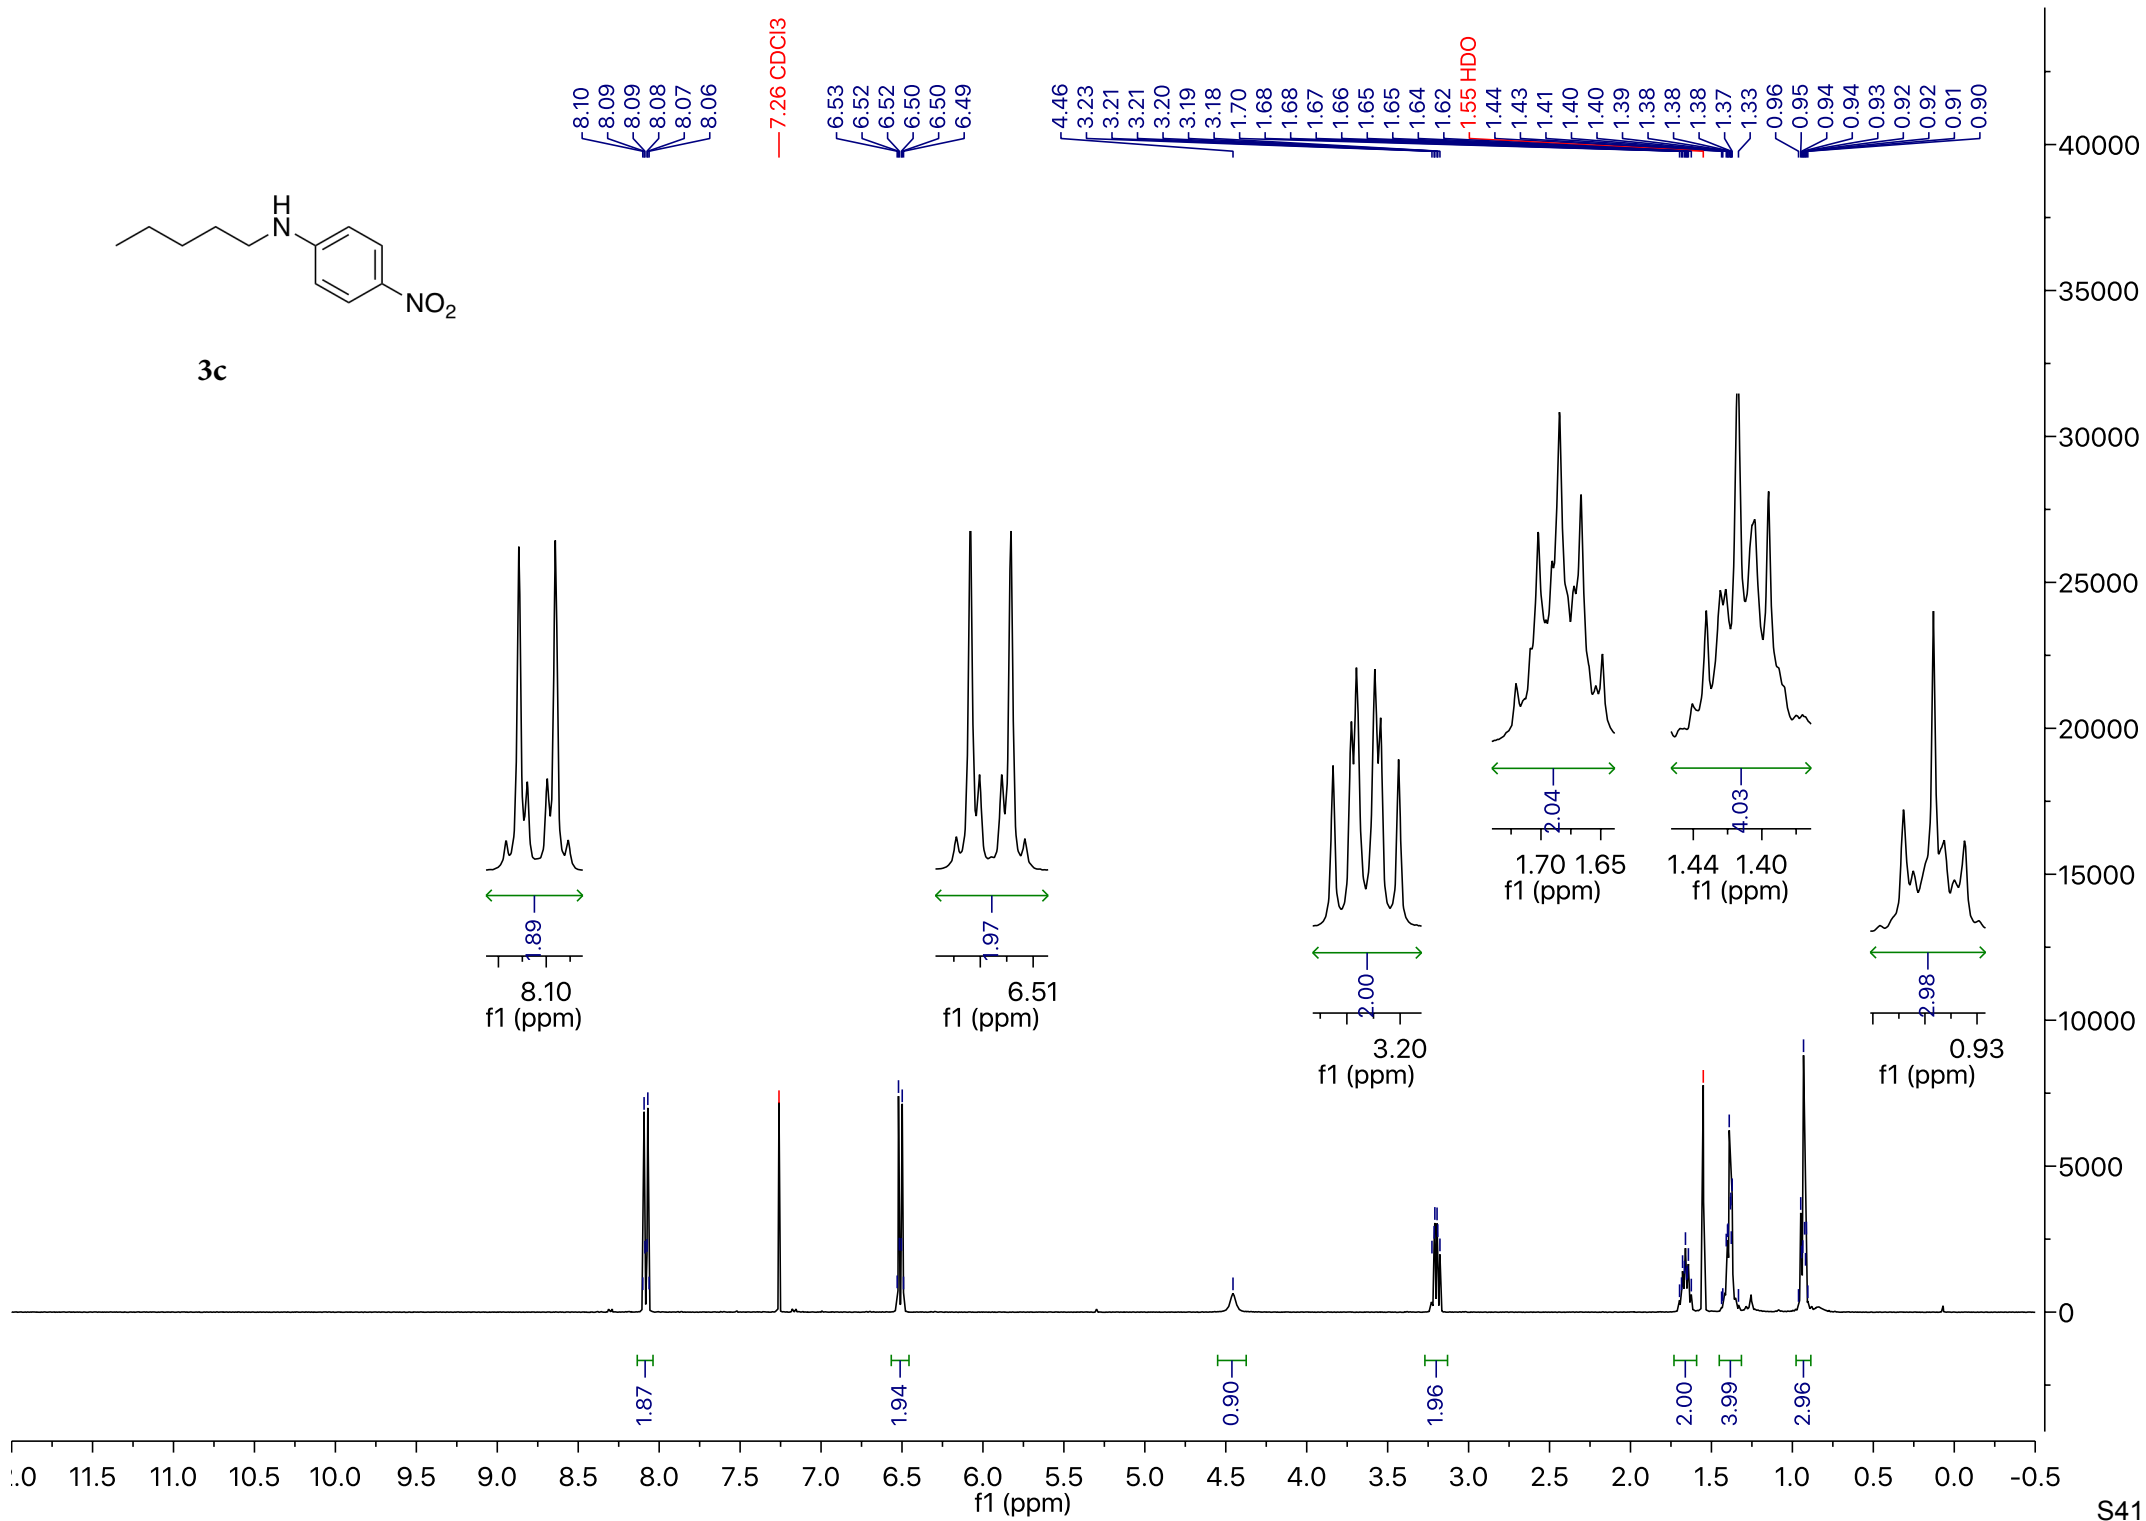

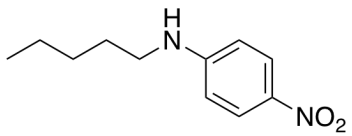

3c

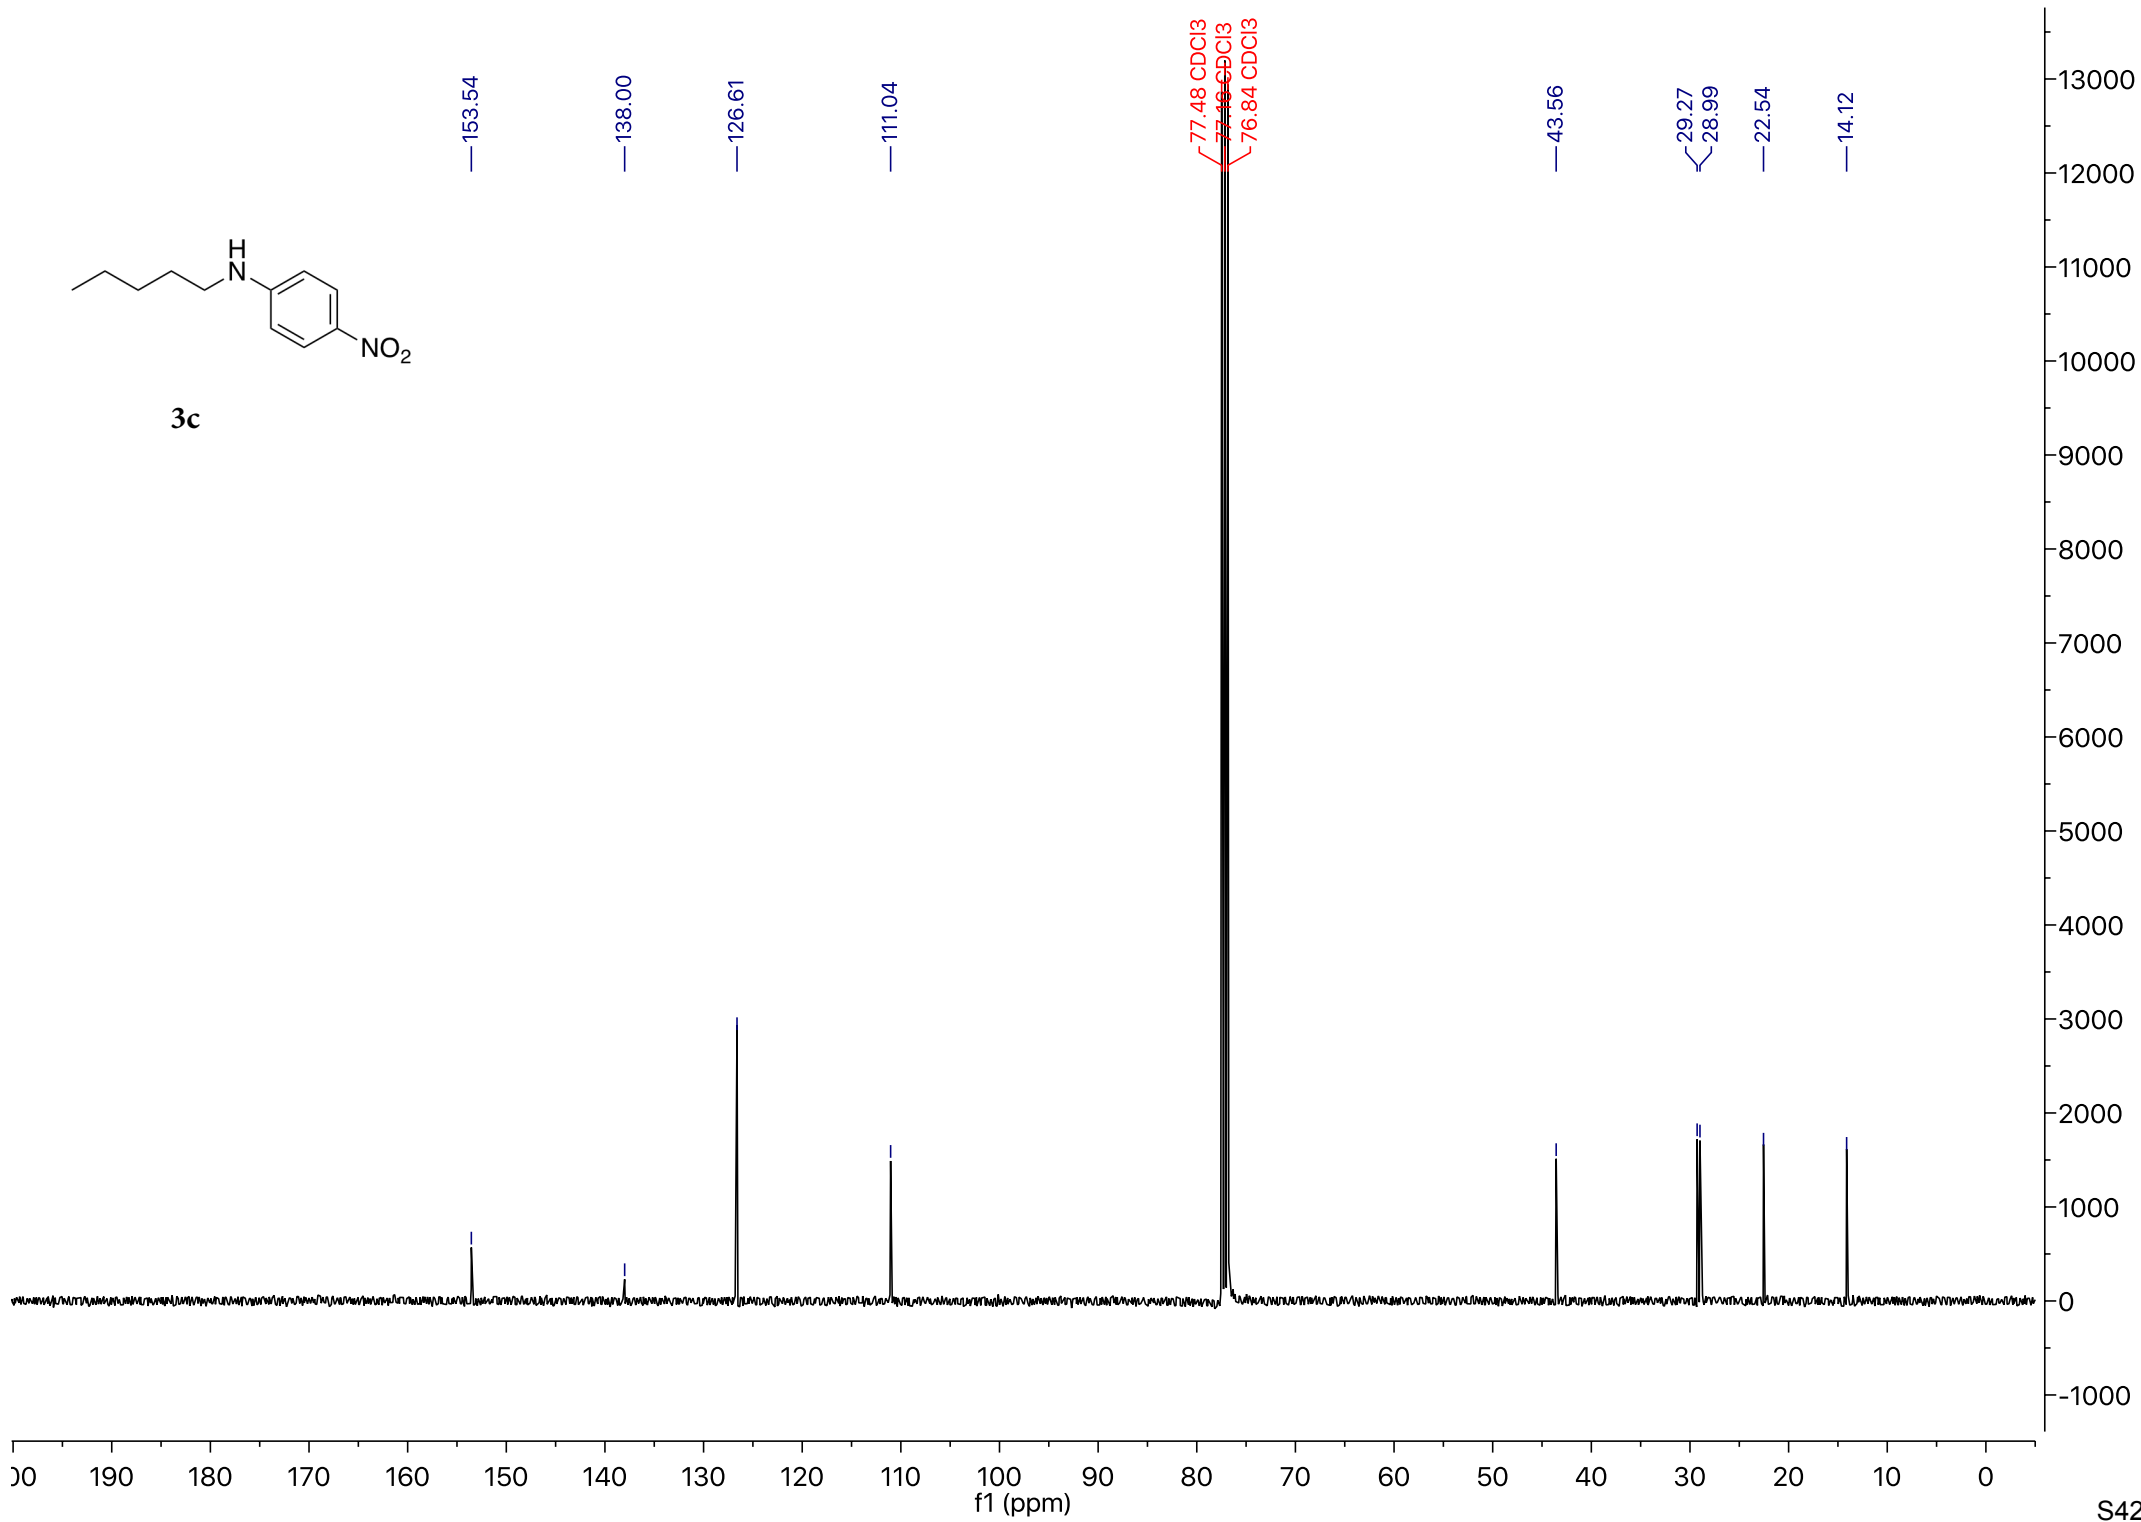

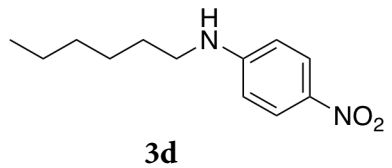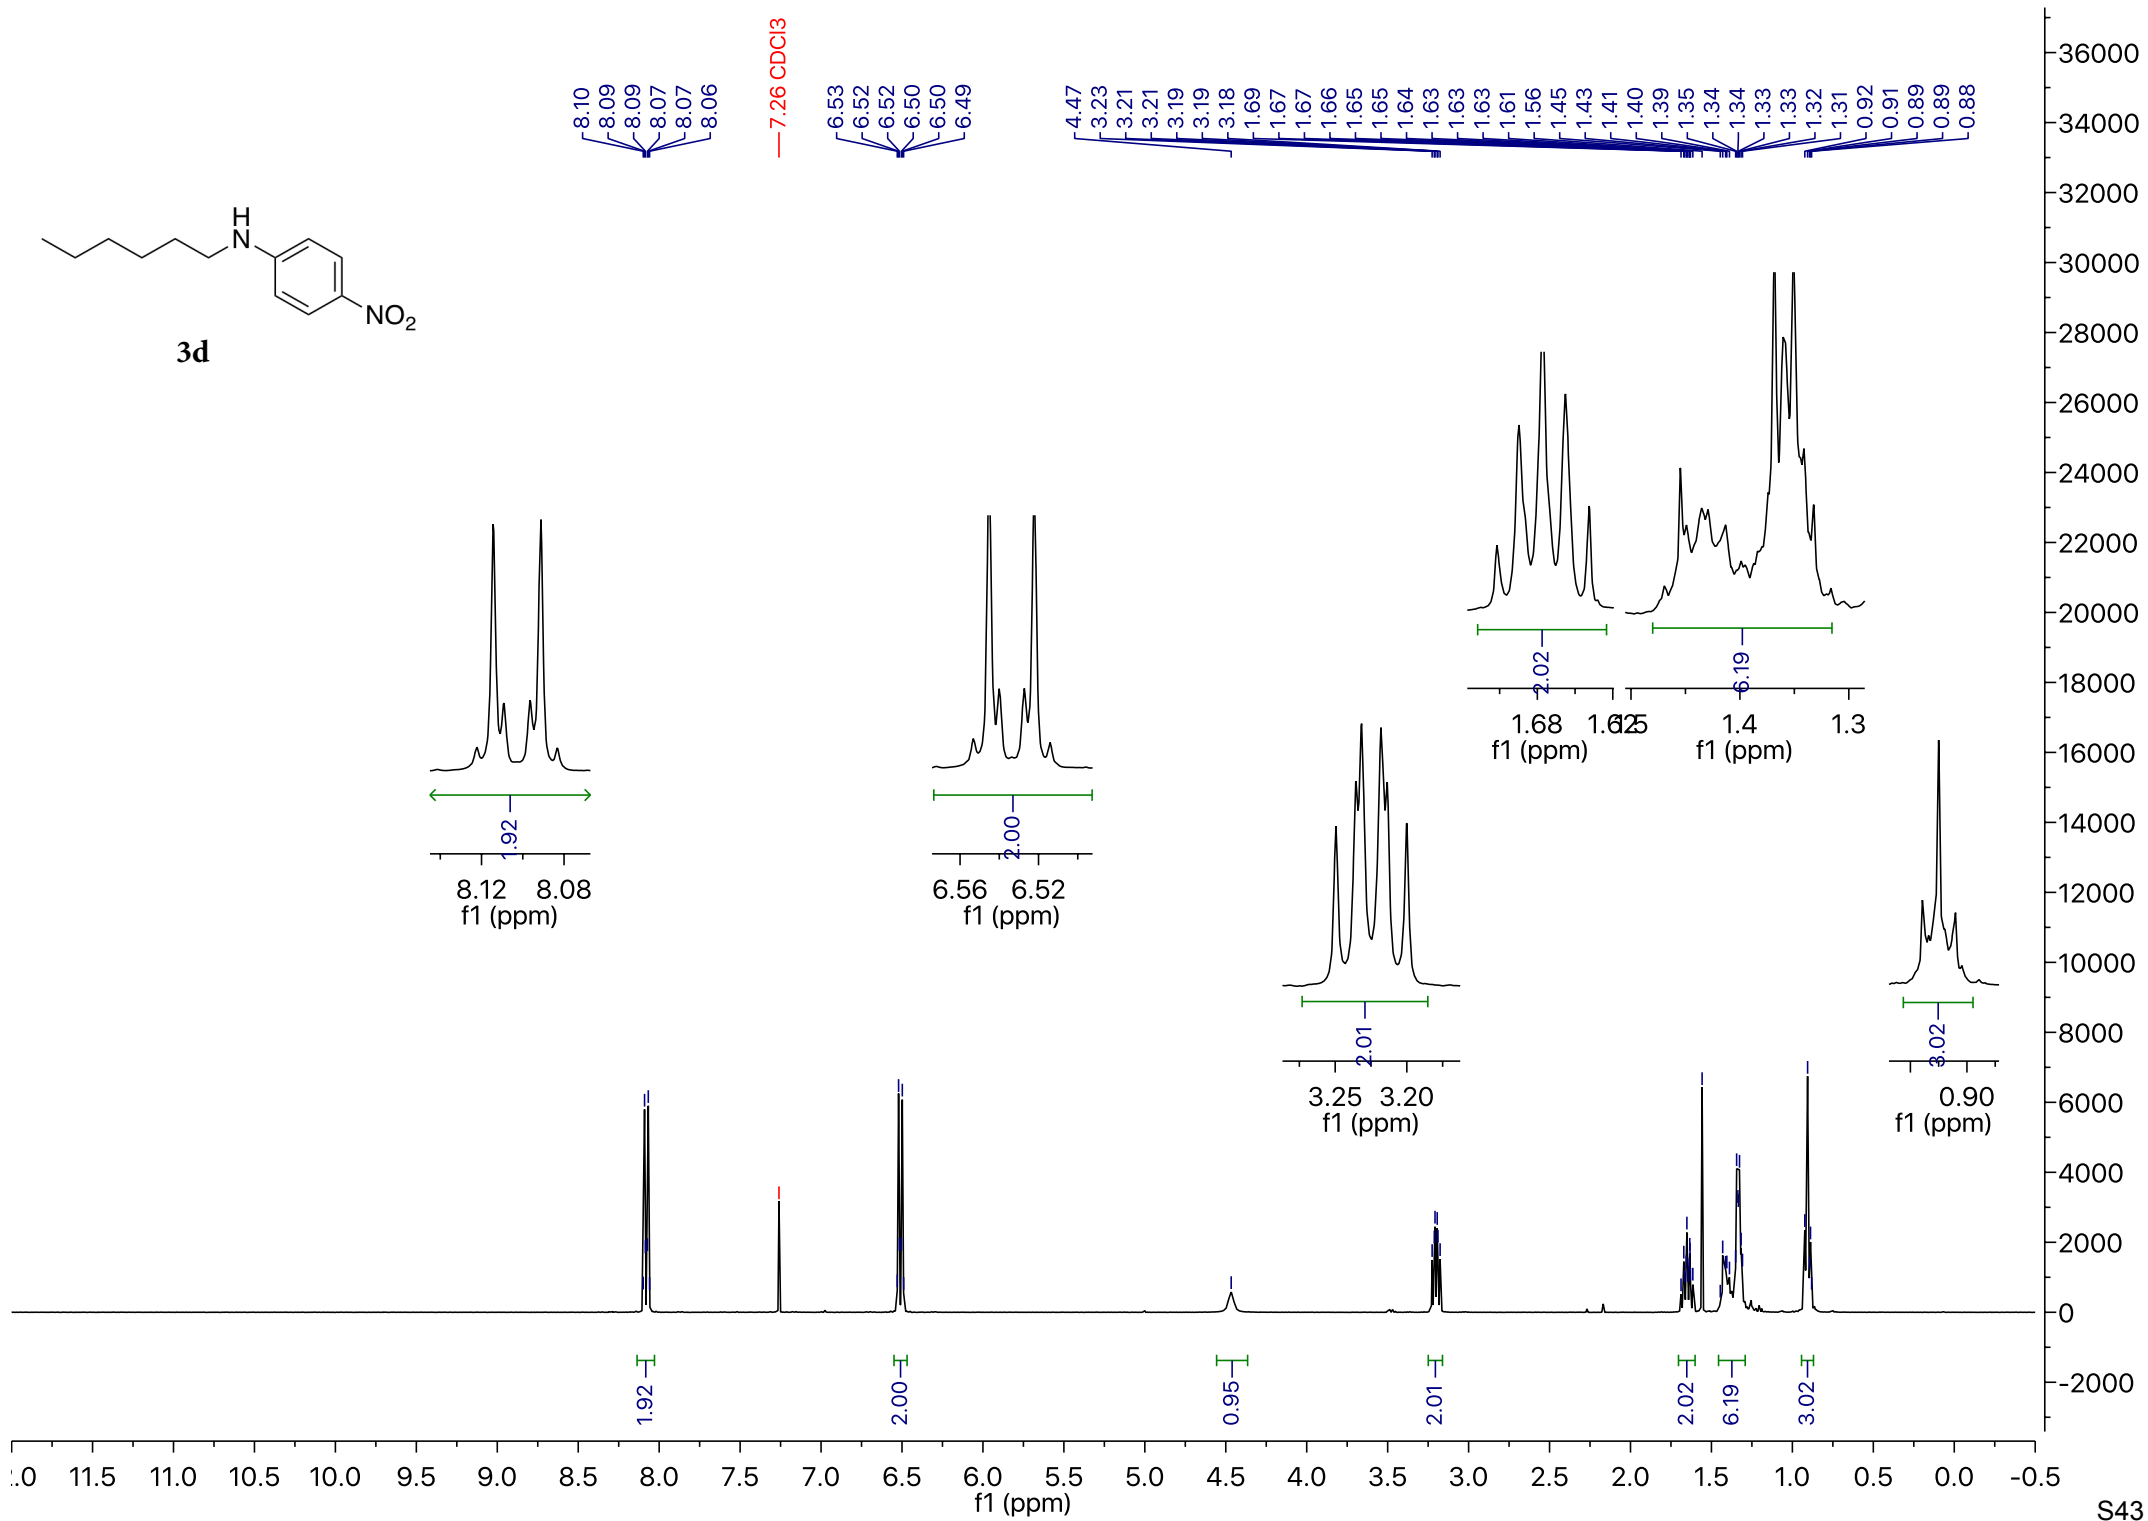



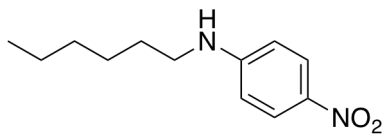

3d

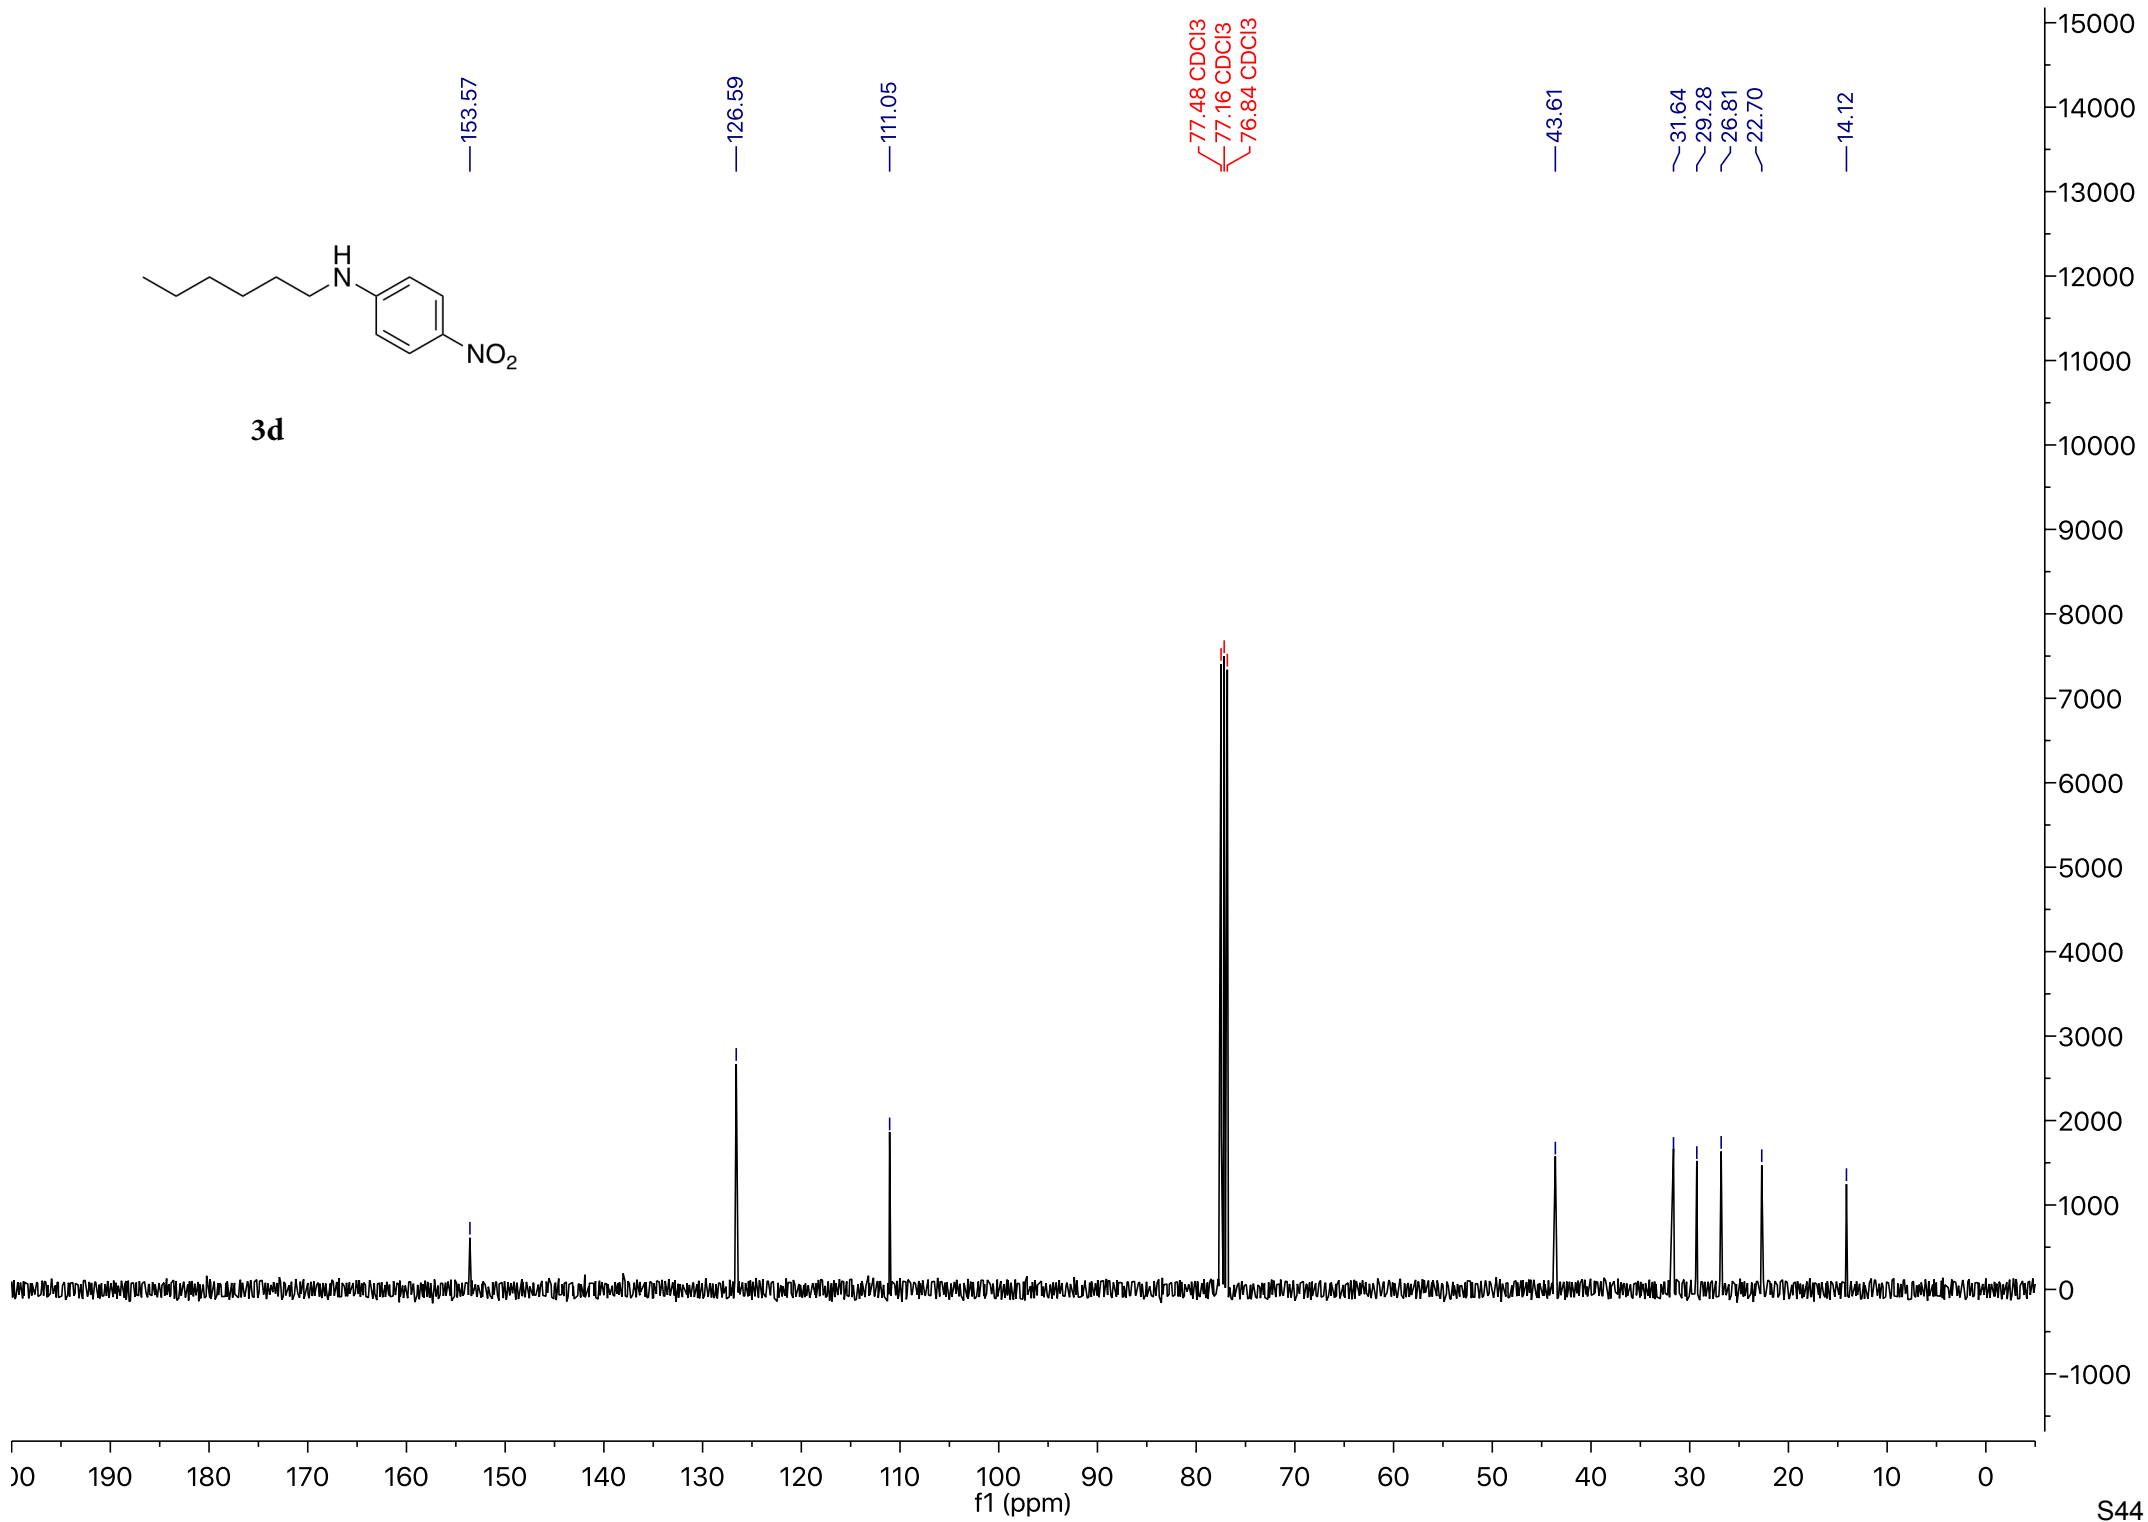

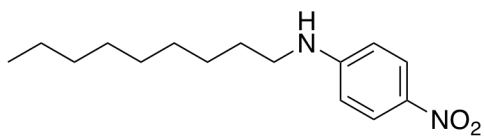

3e

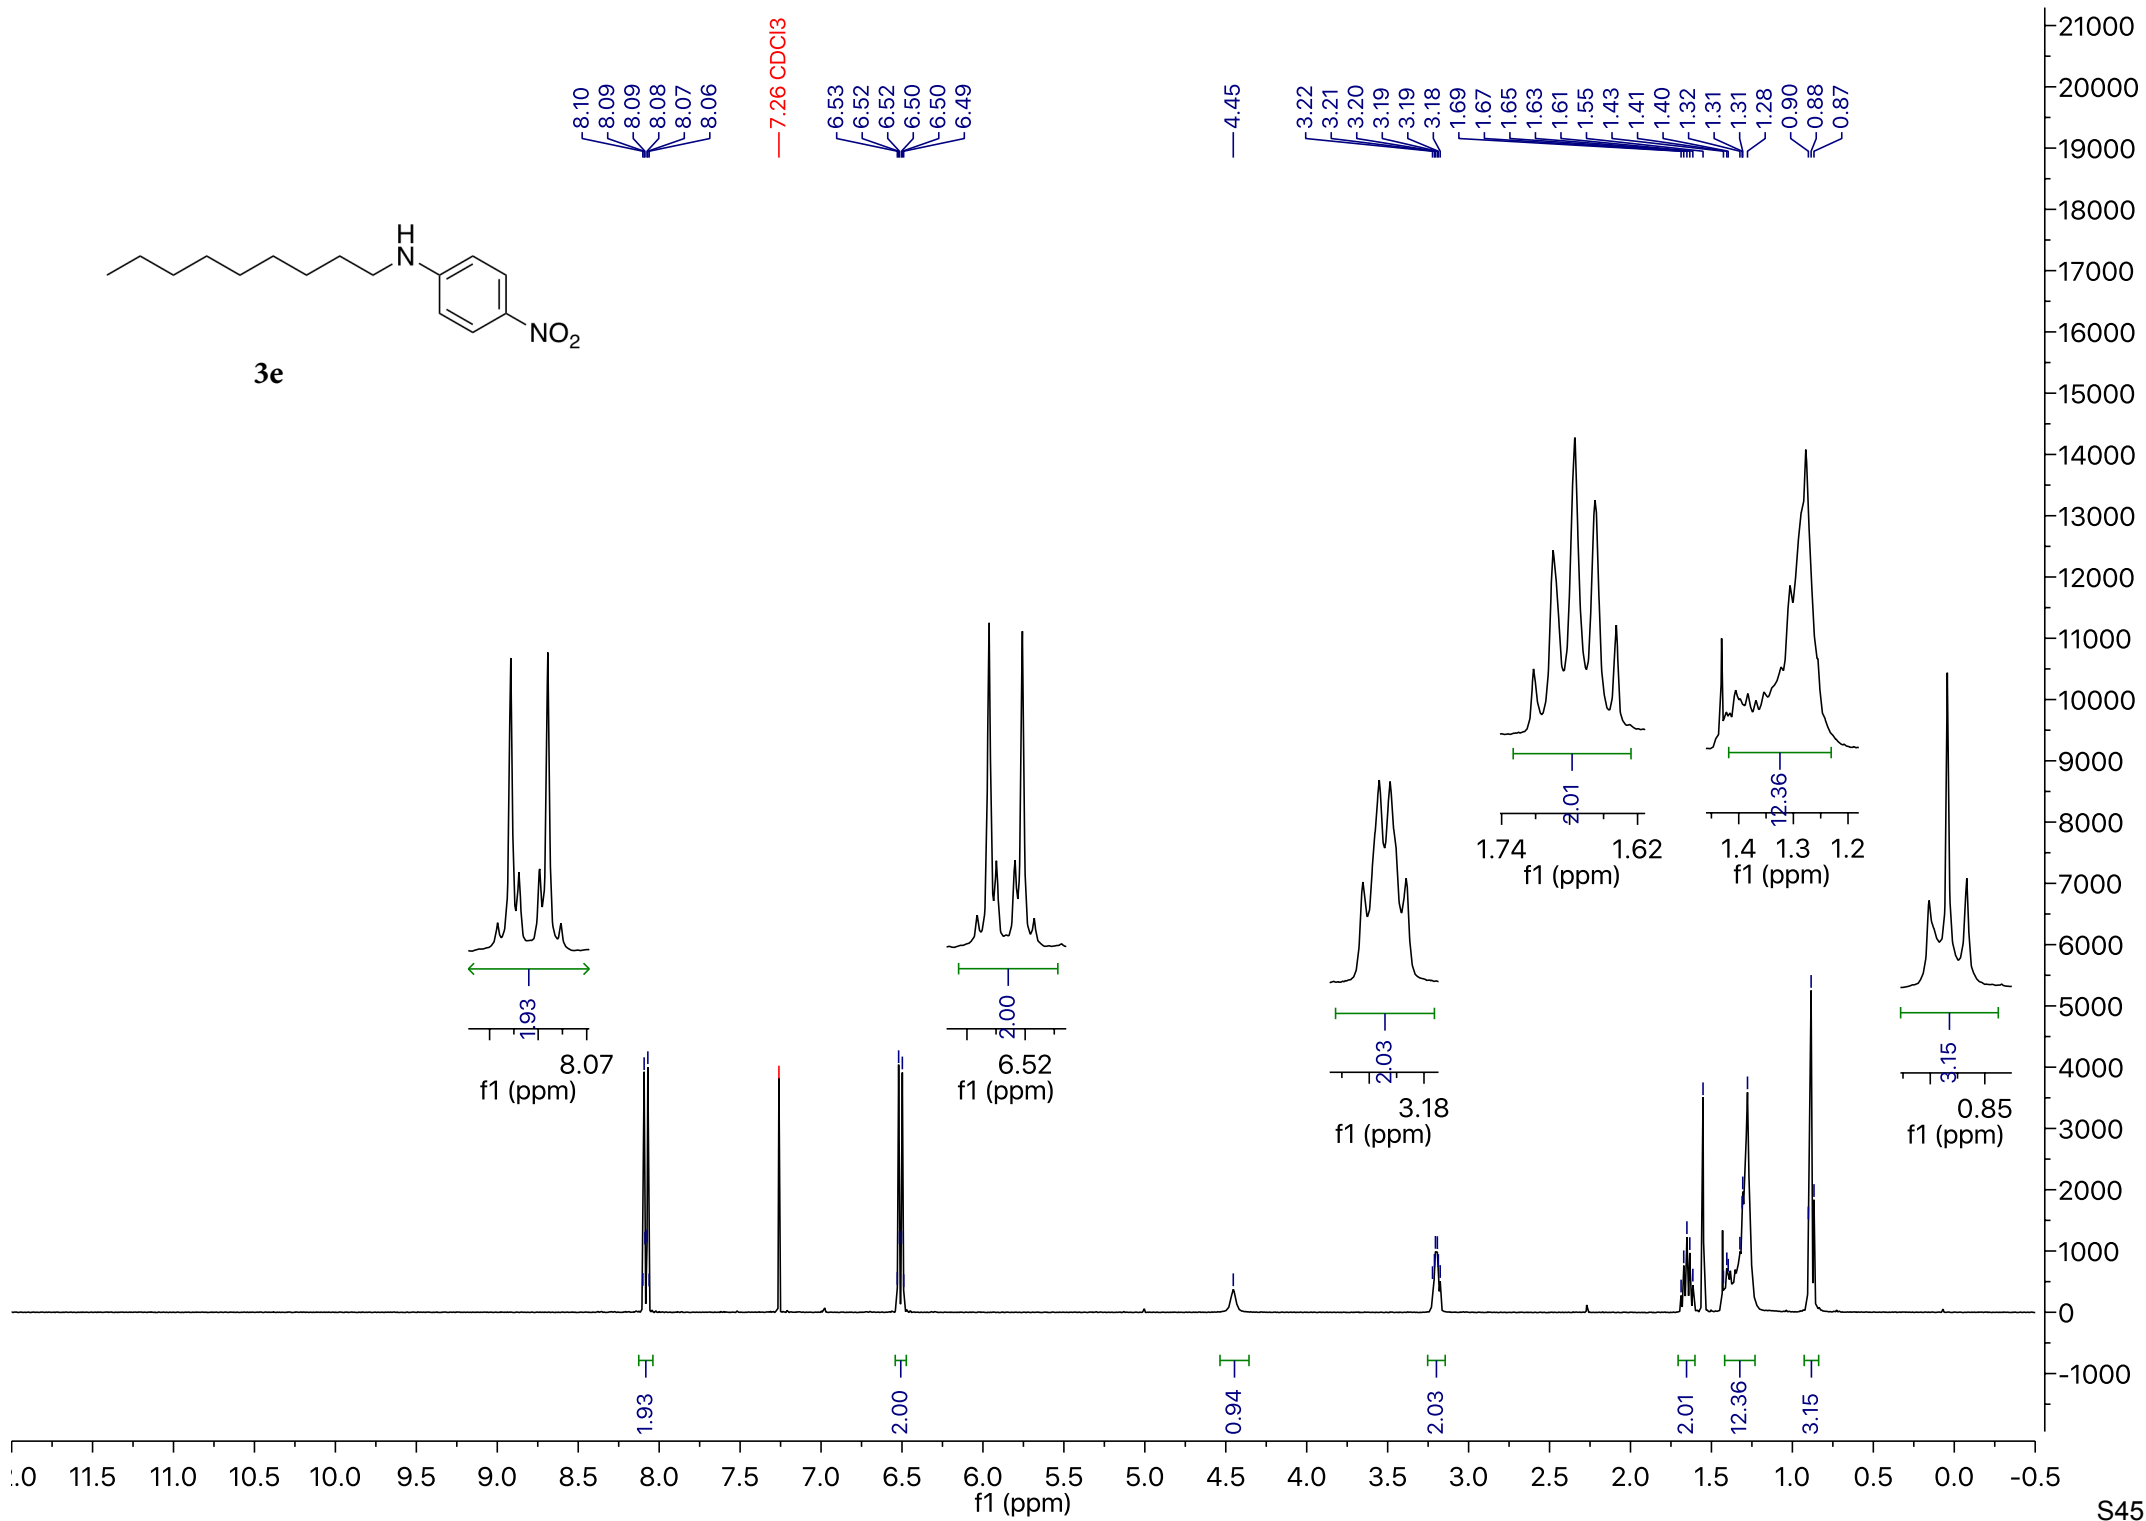

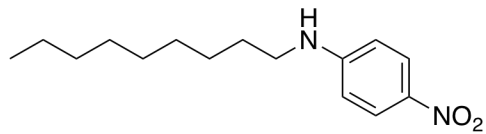

3e

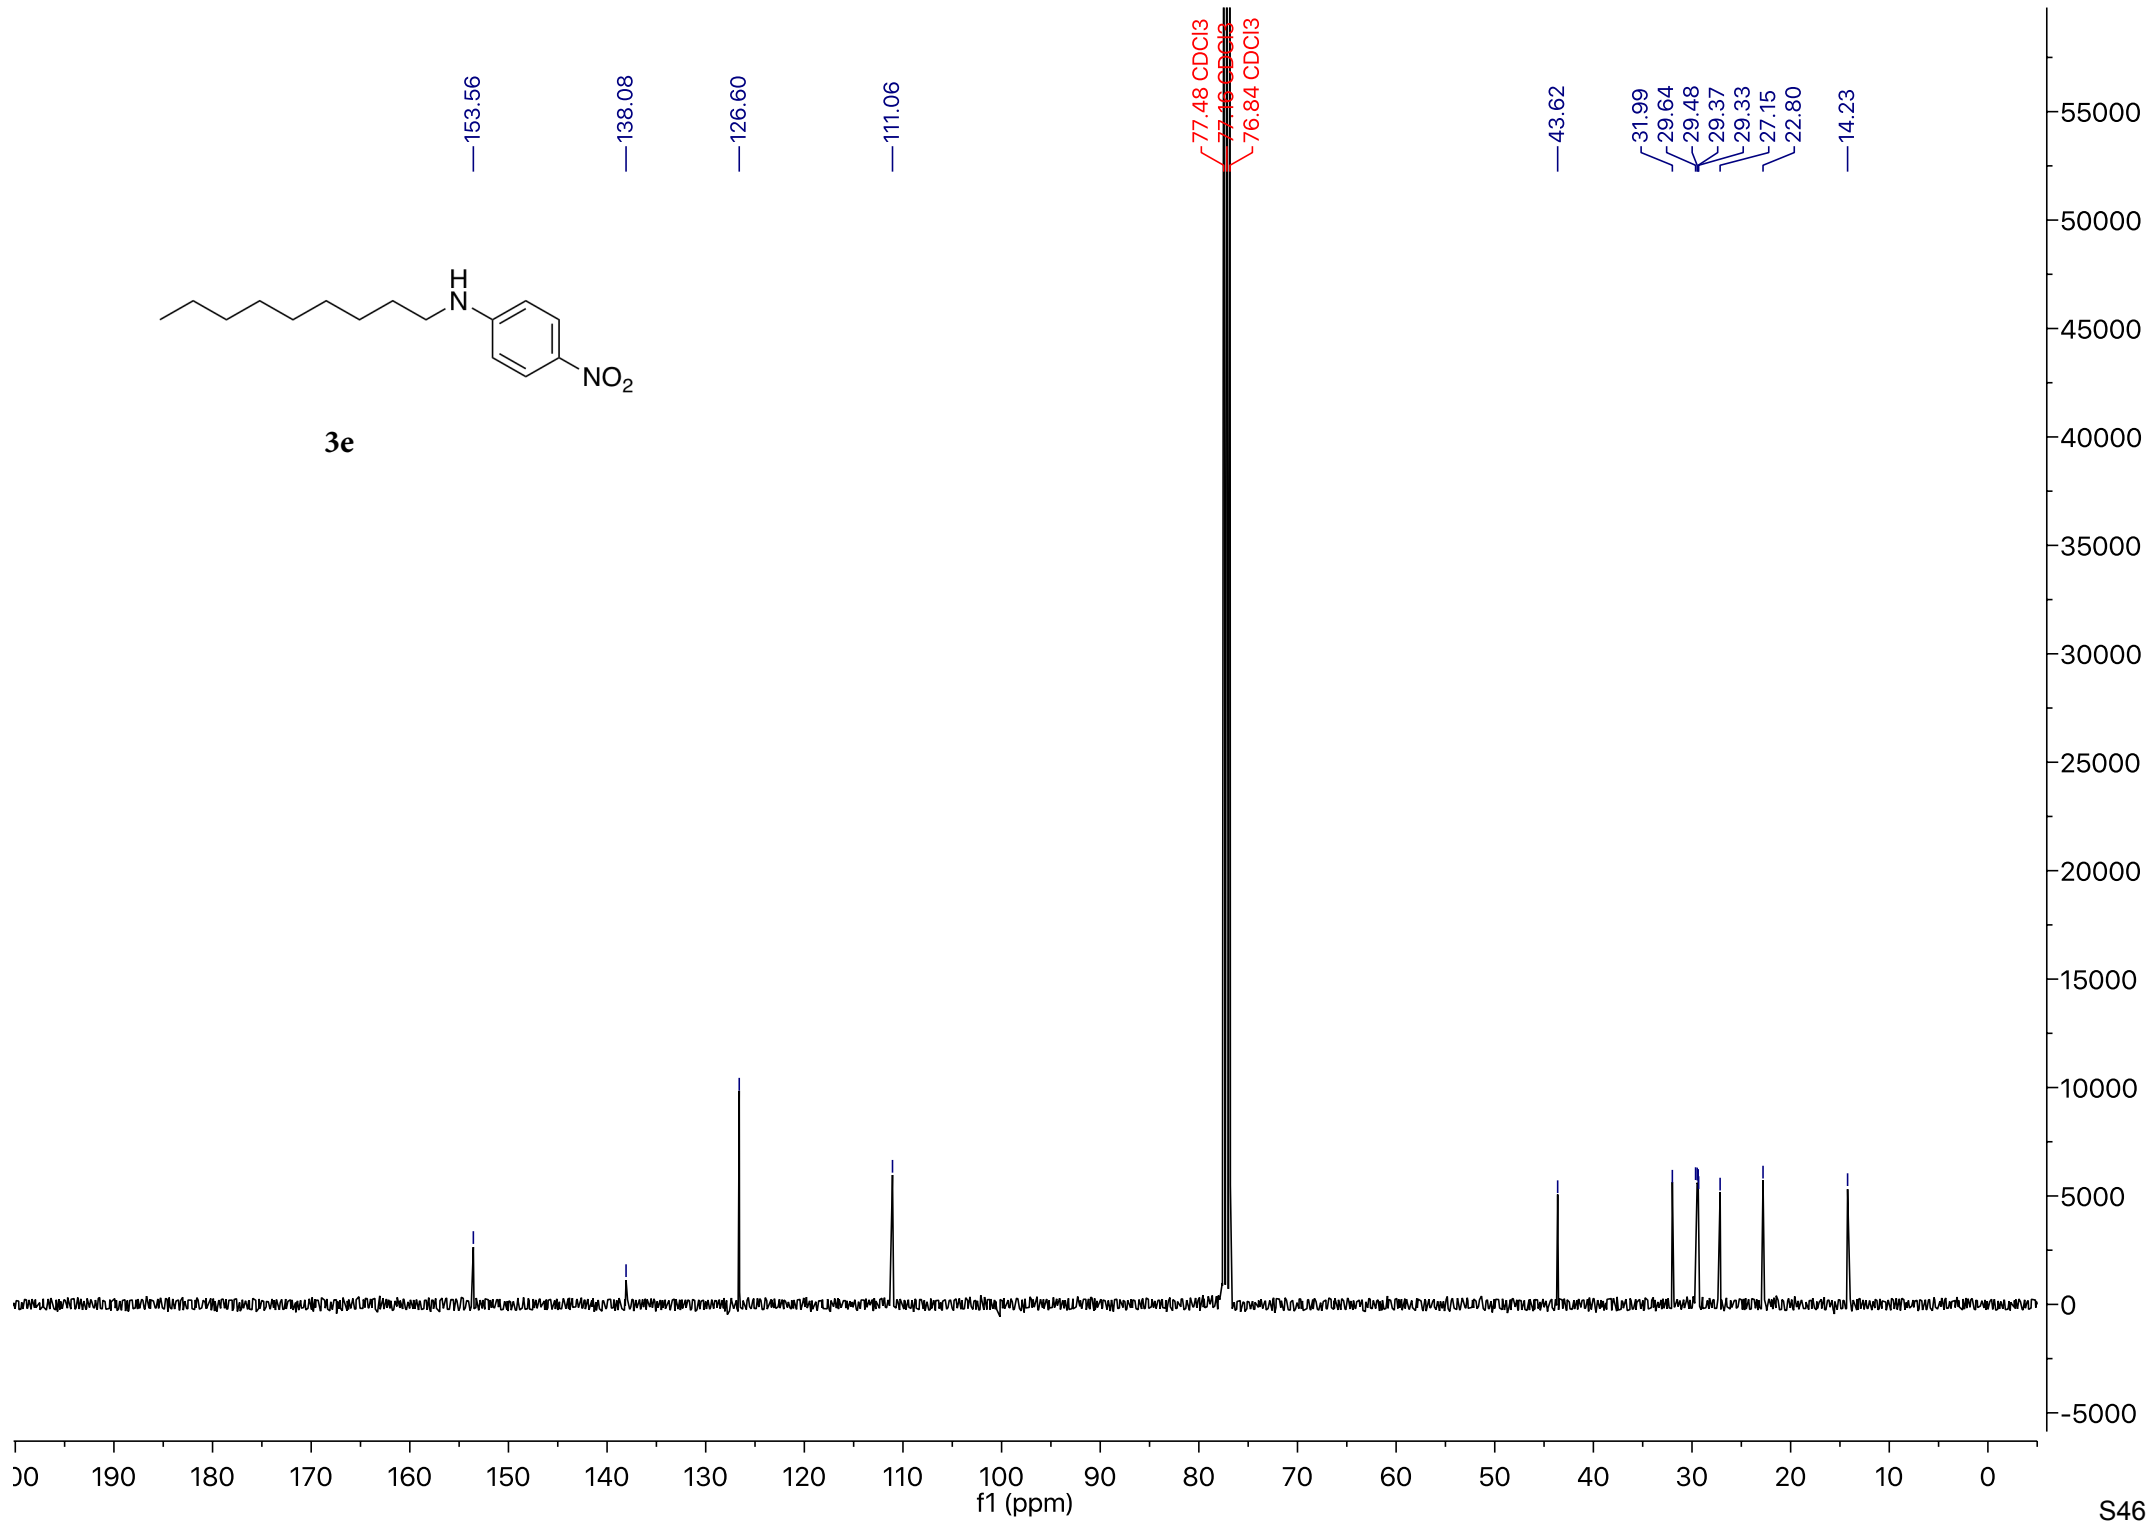

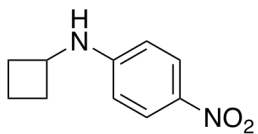

3f

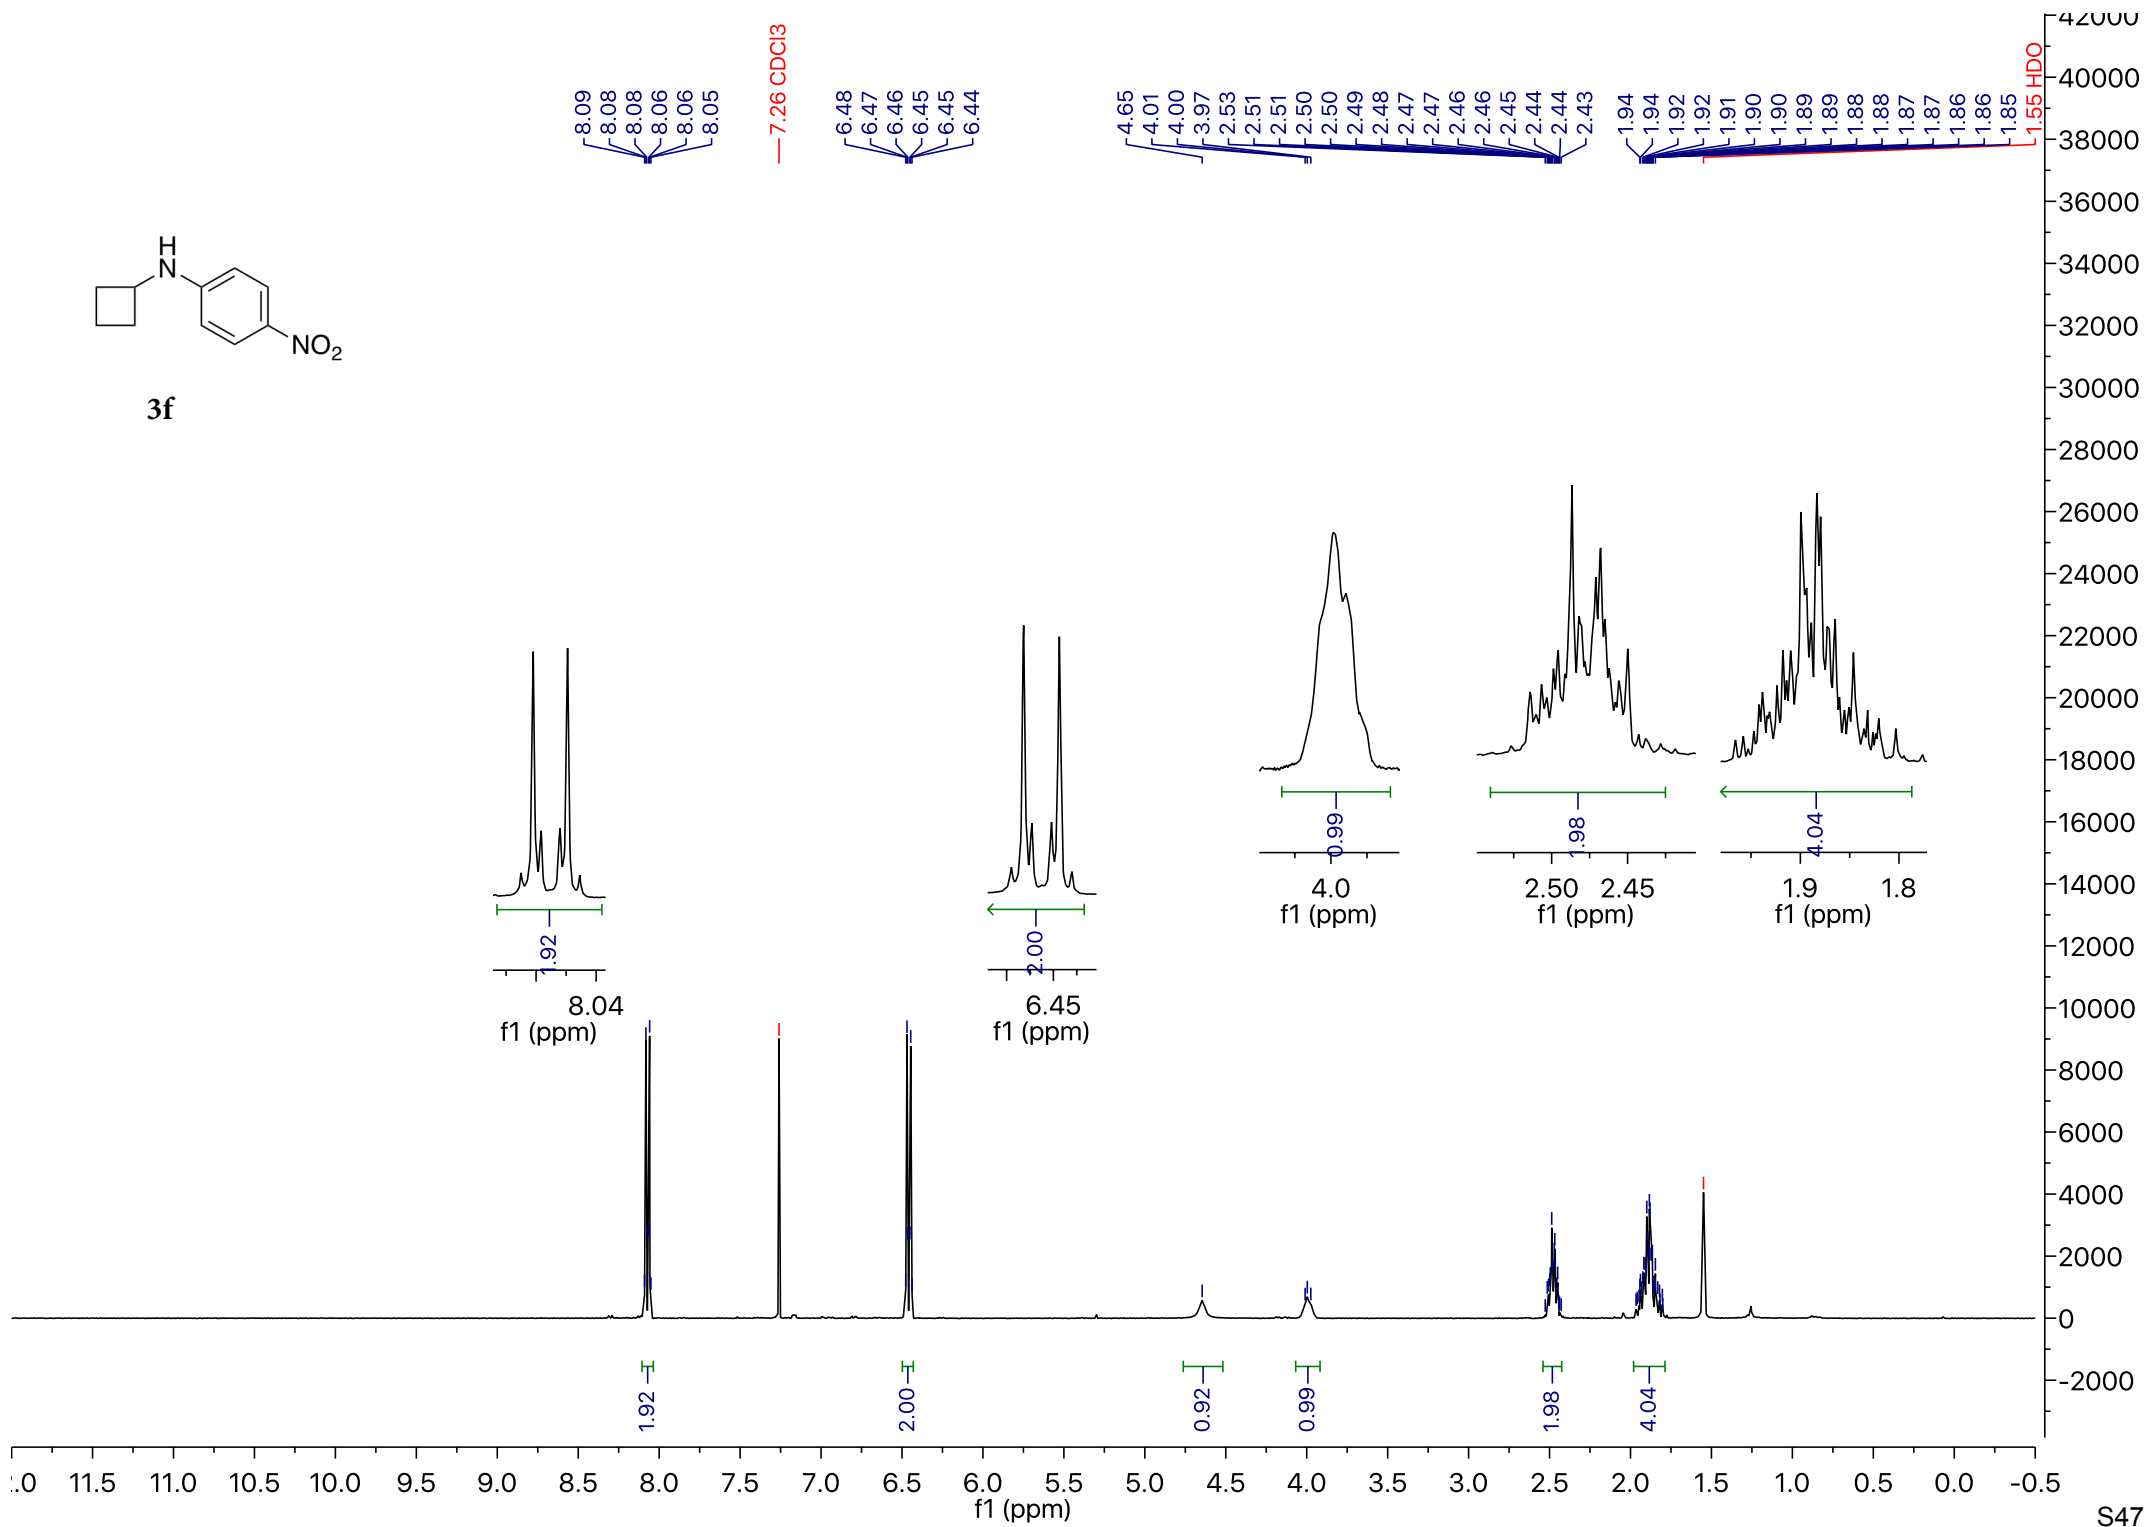

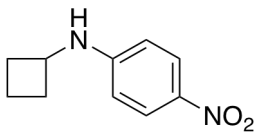

3f

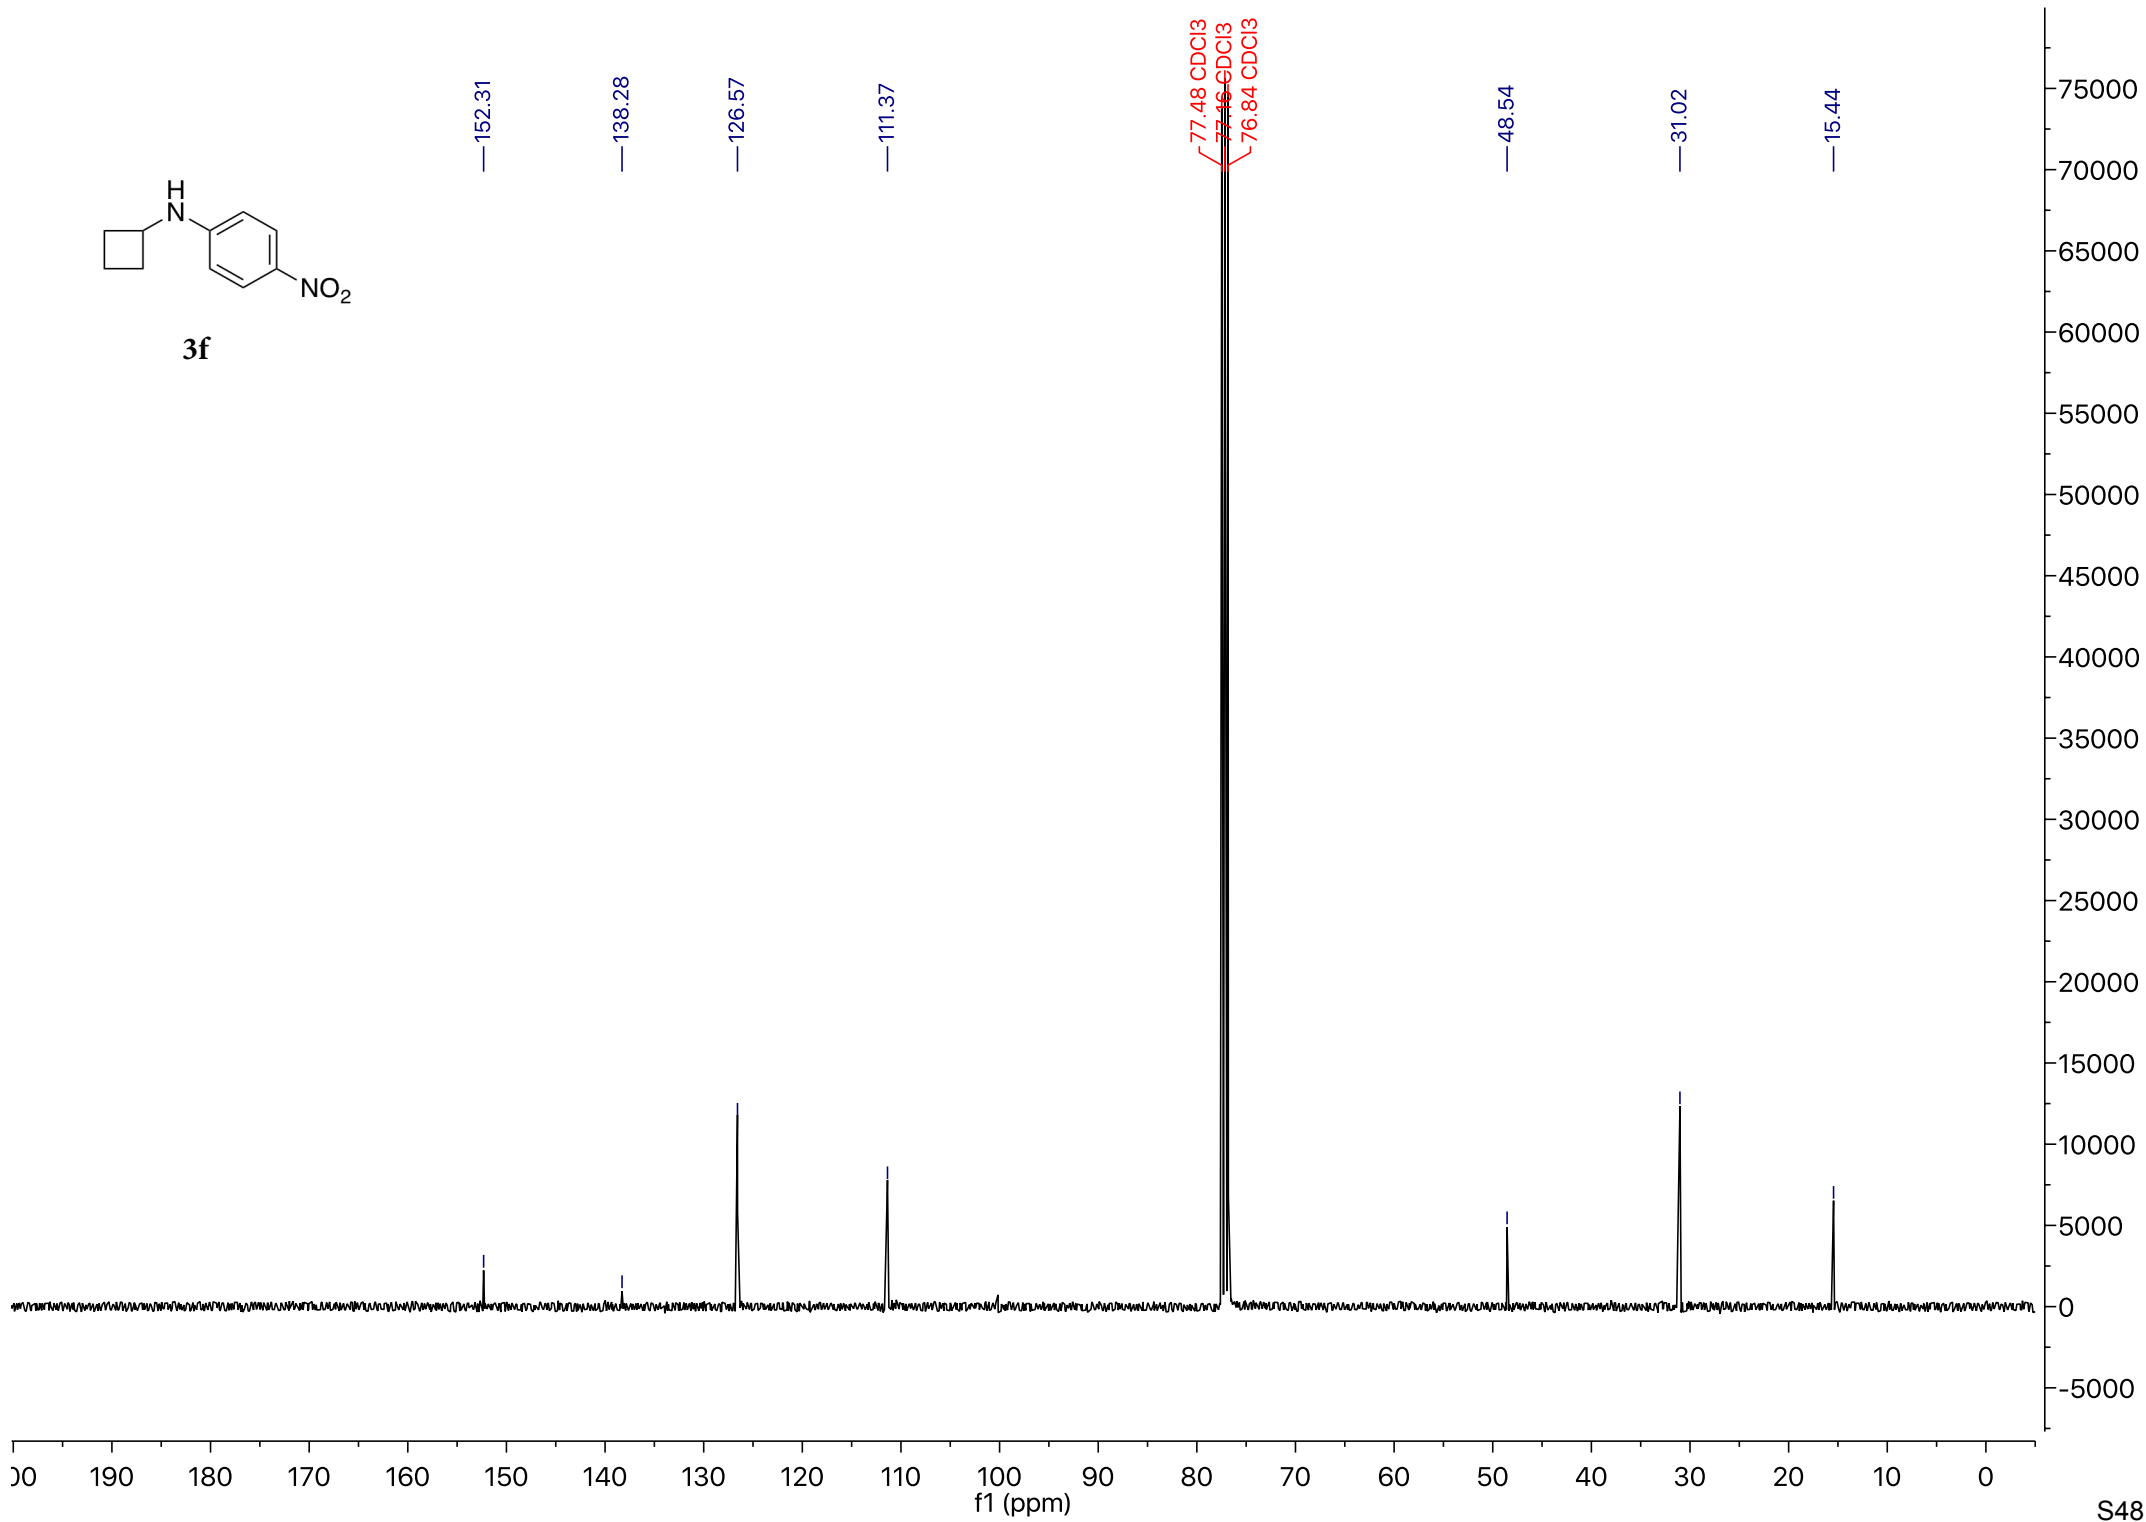

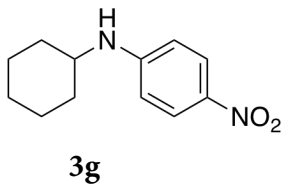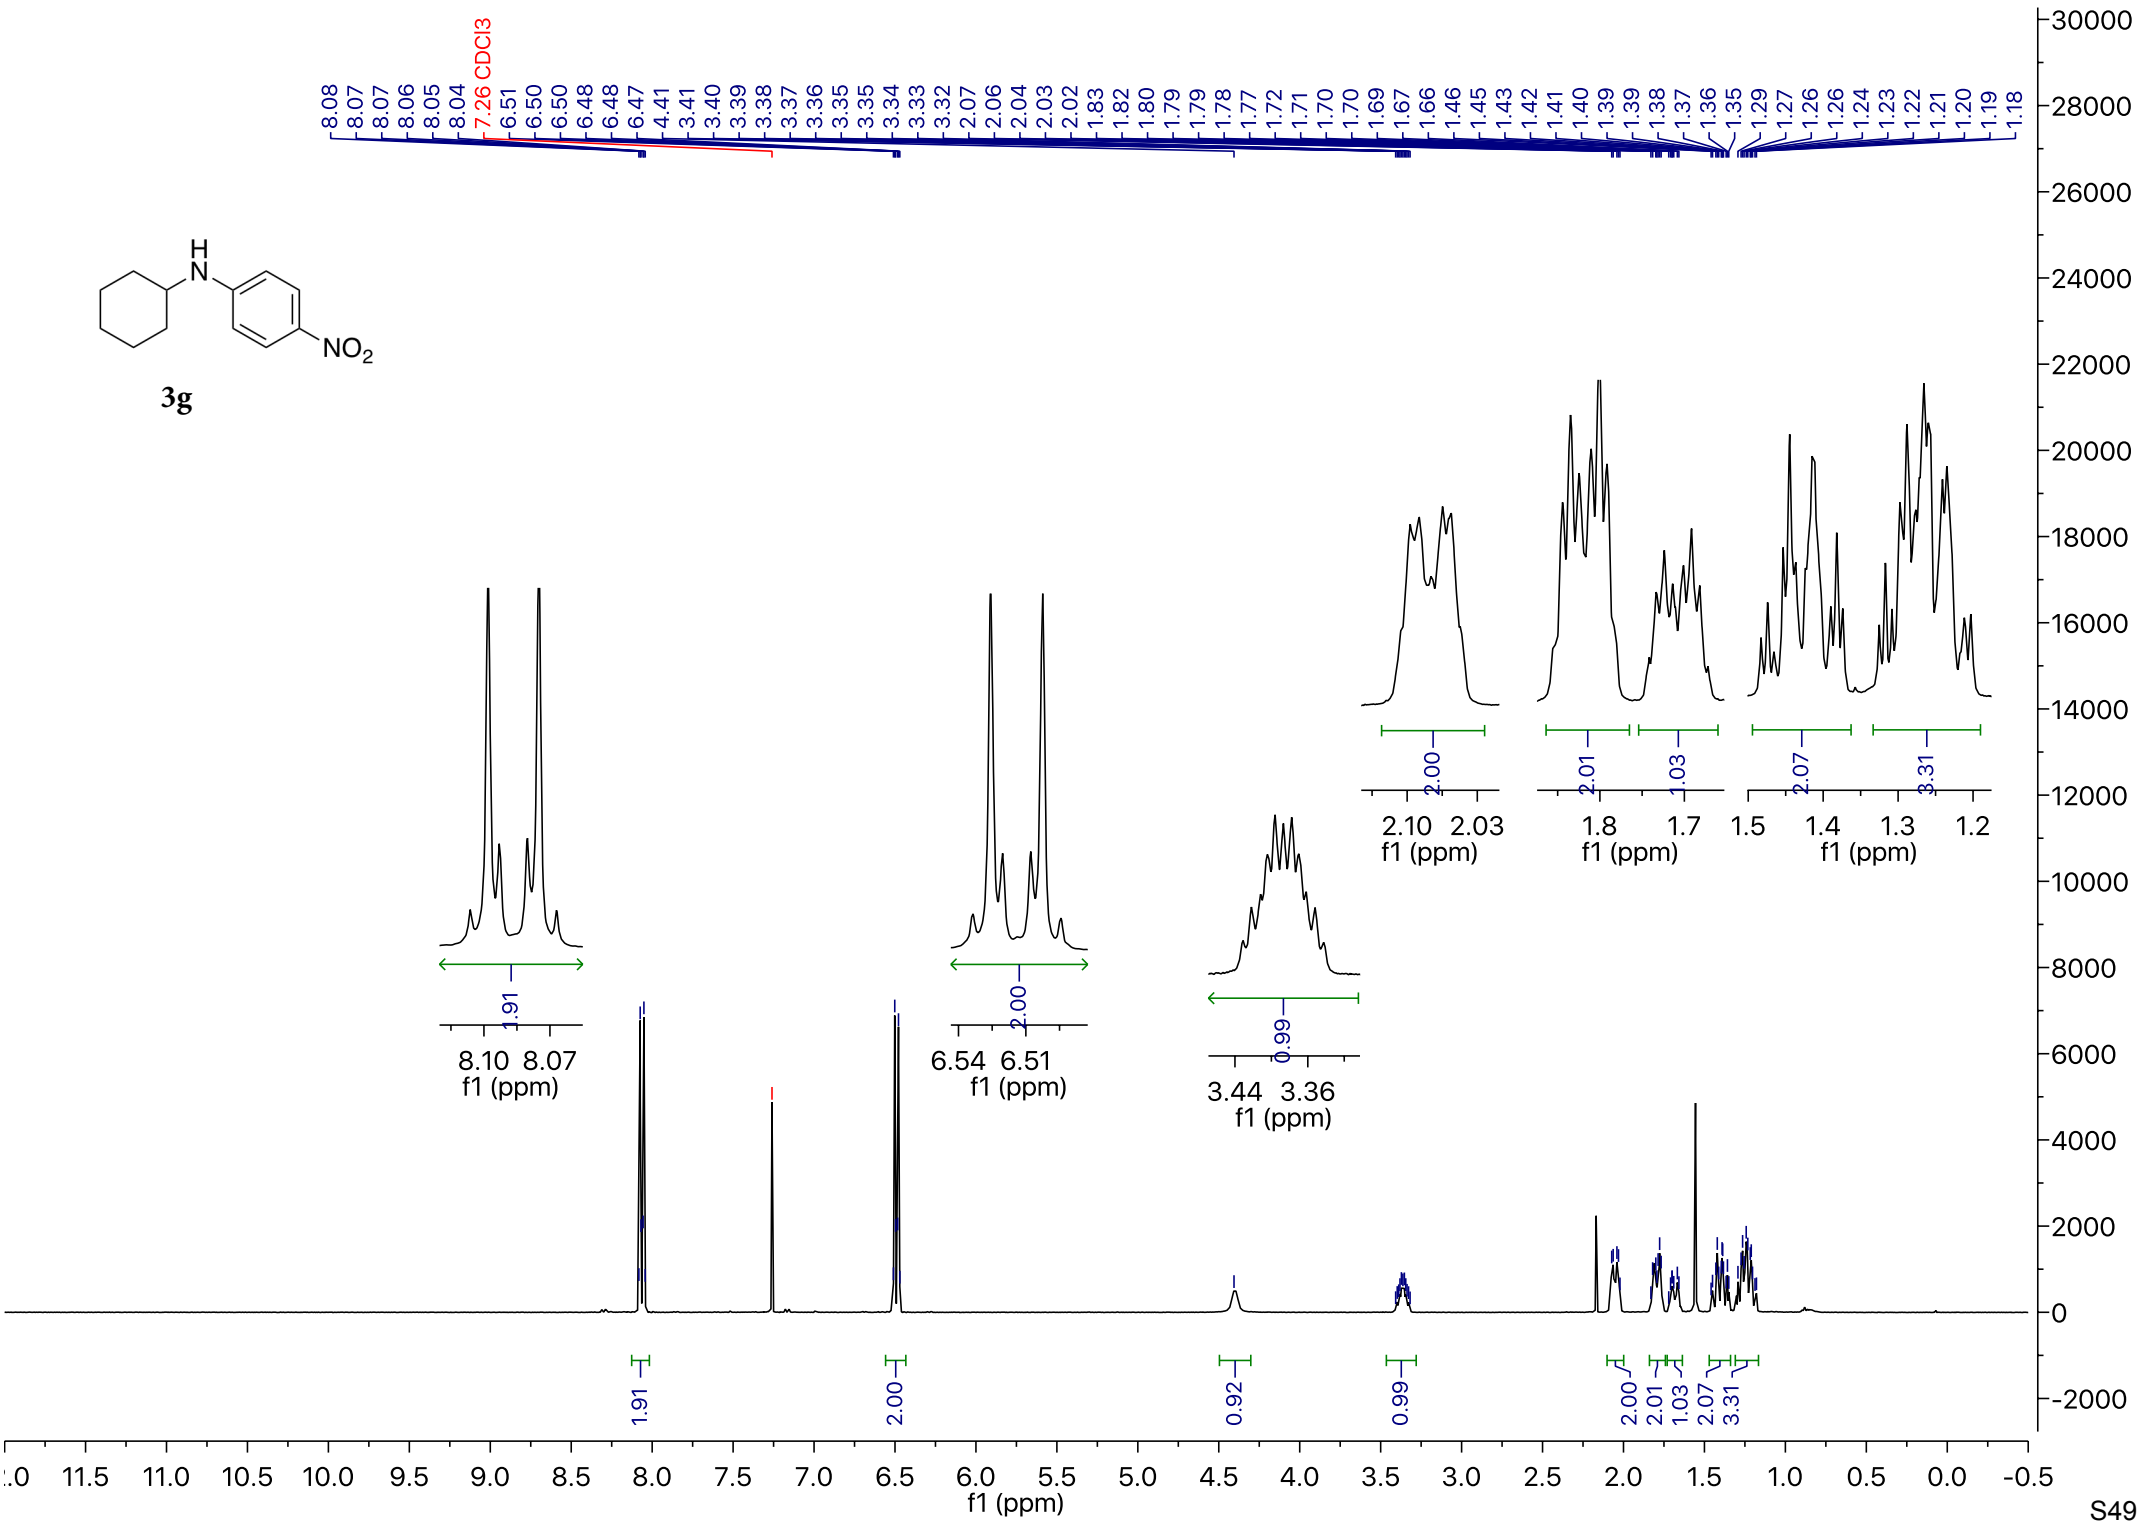

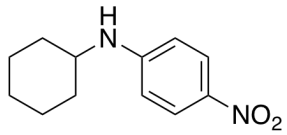

3g

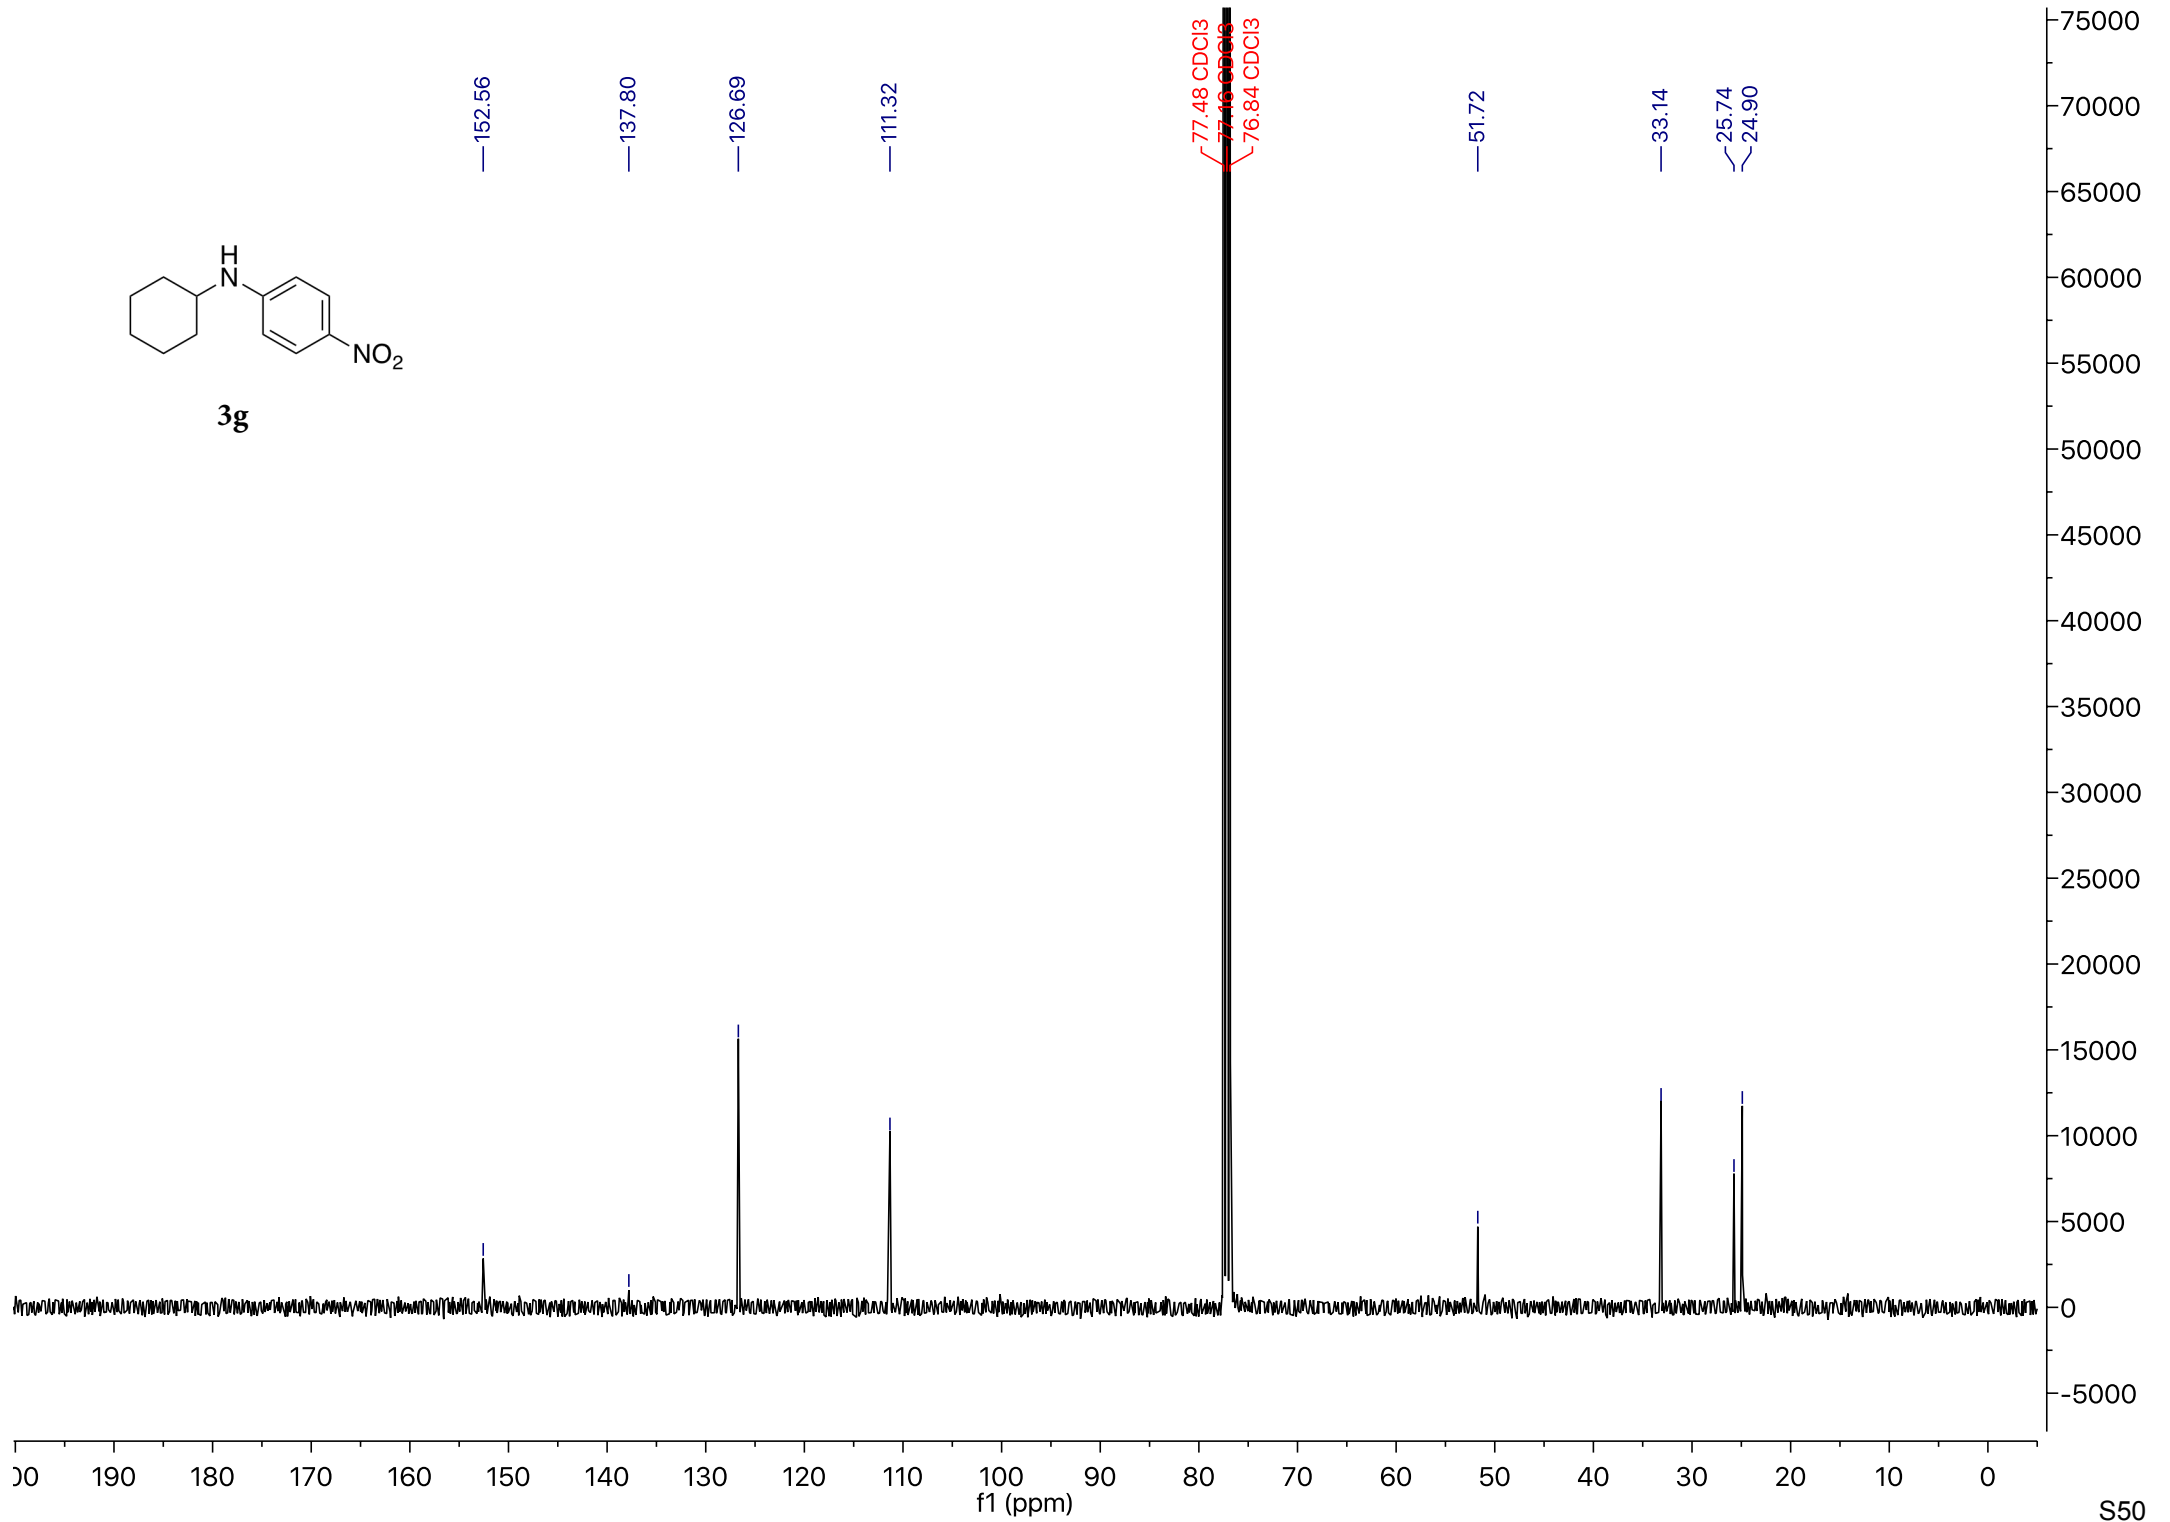

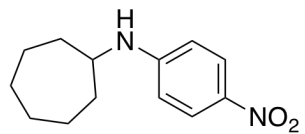

3h

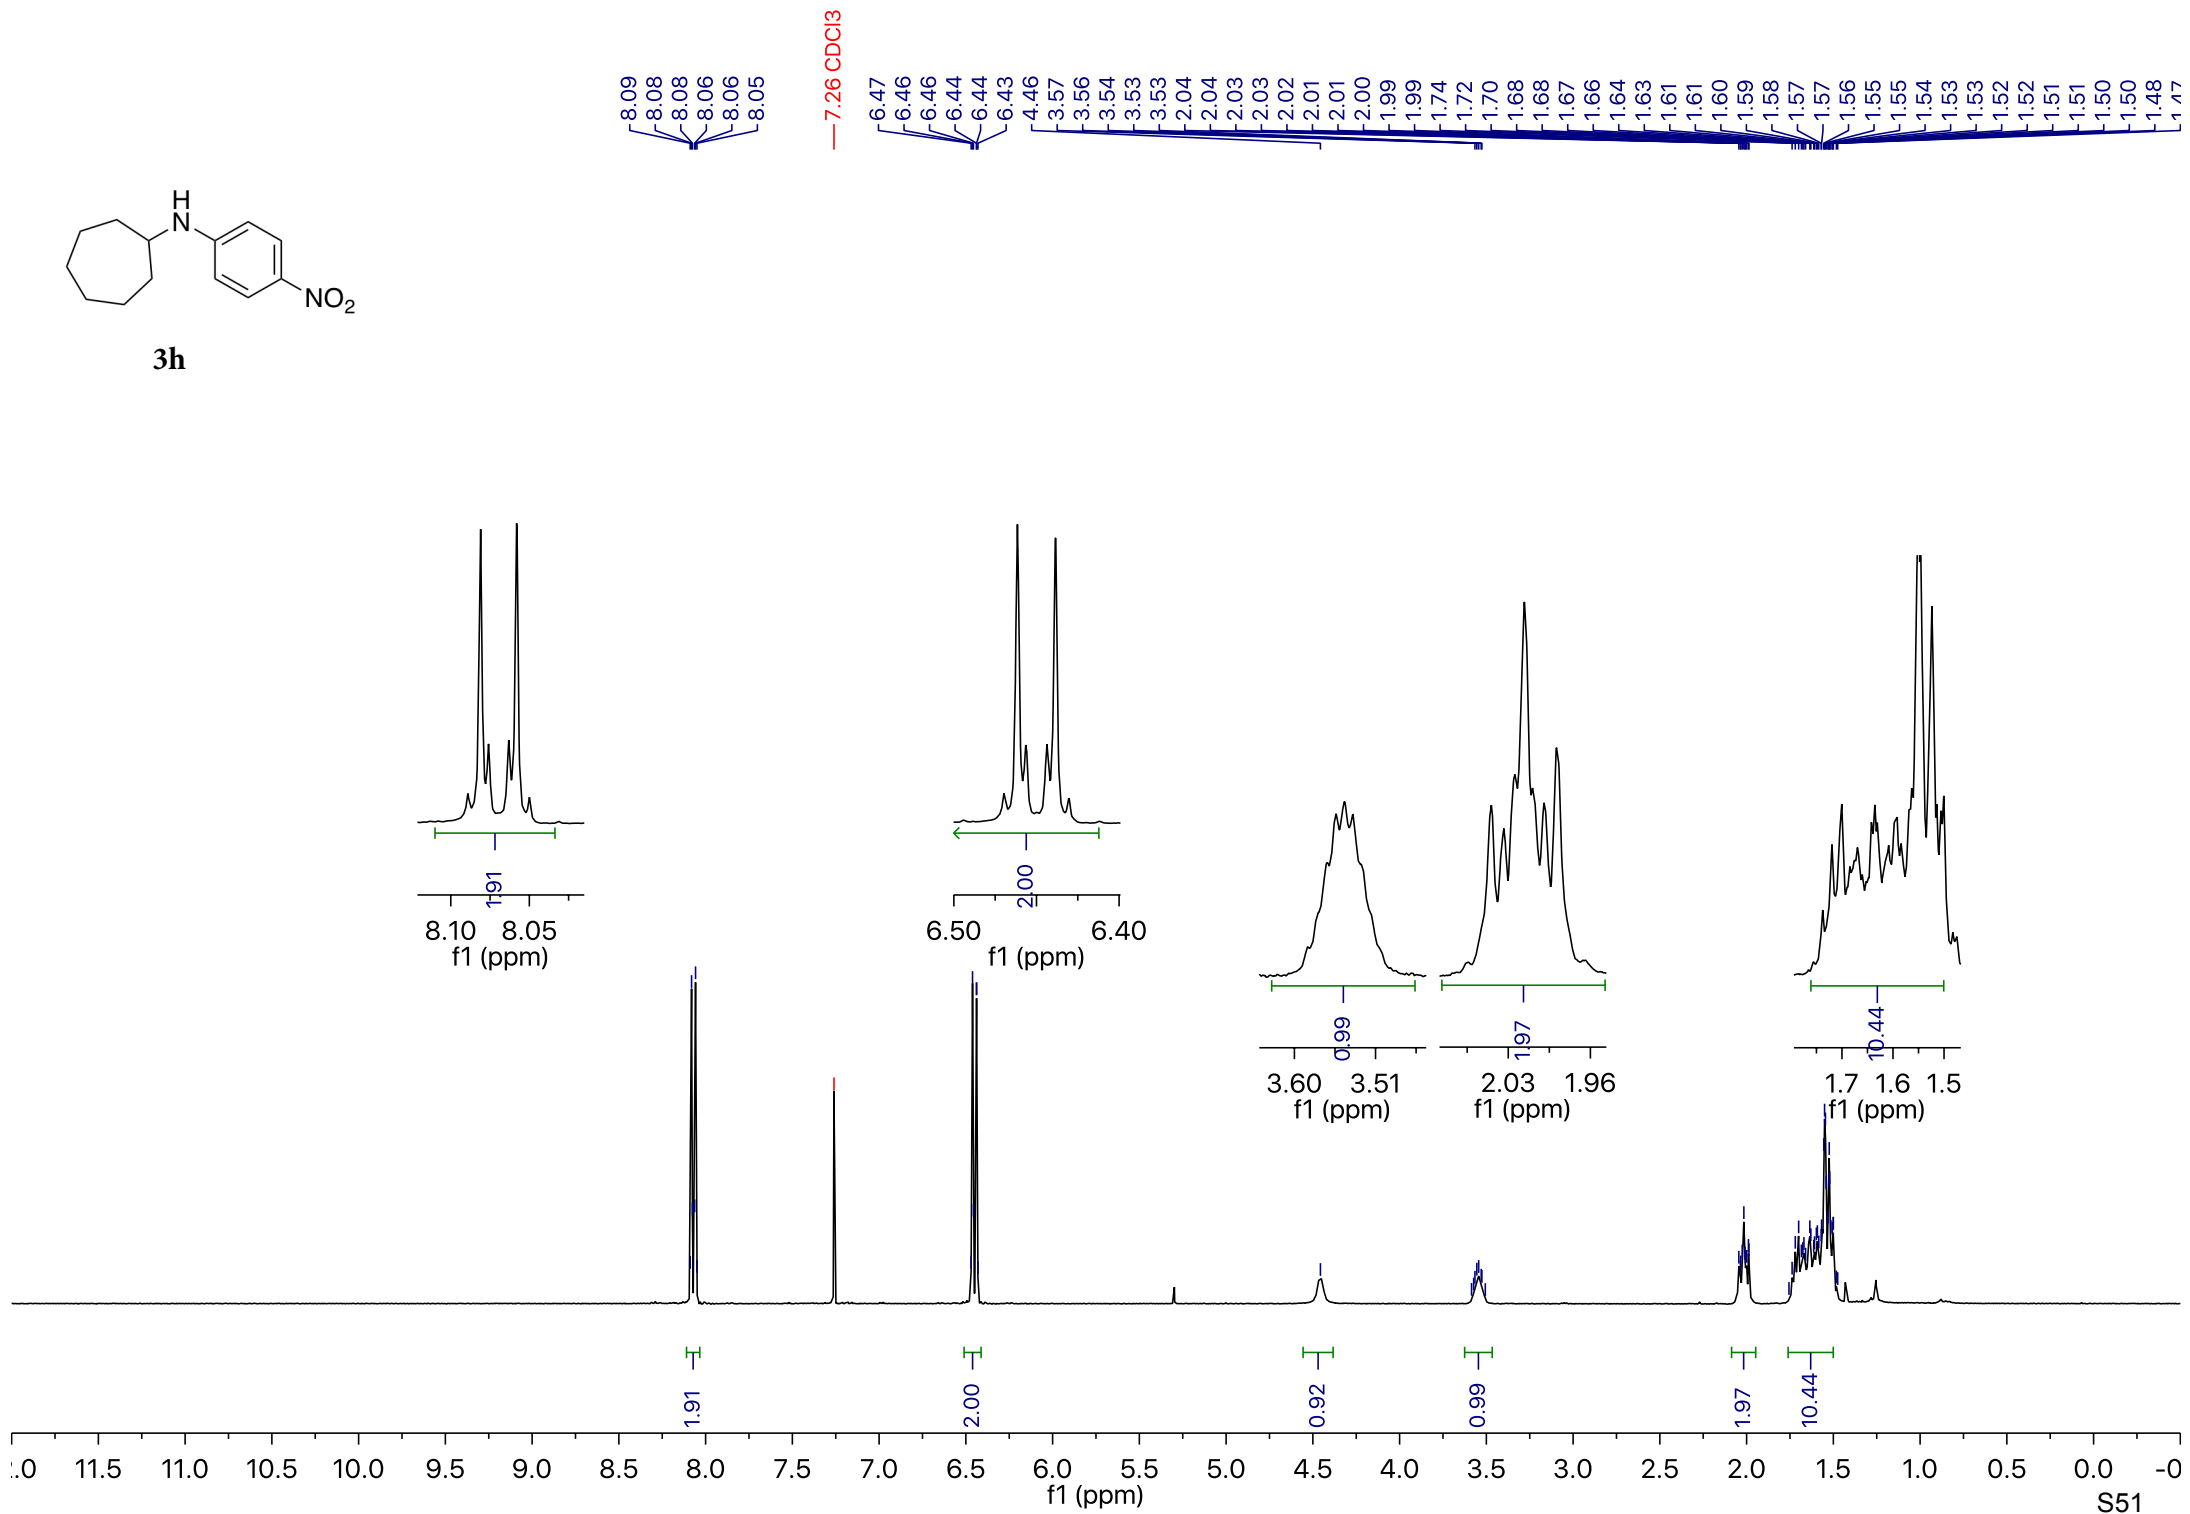



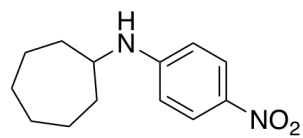

**3h**

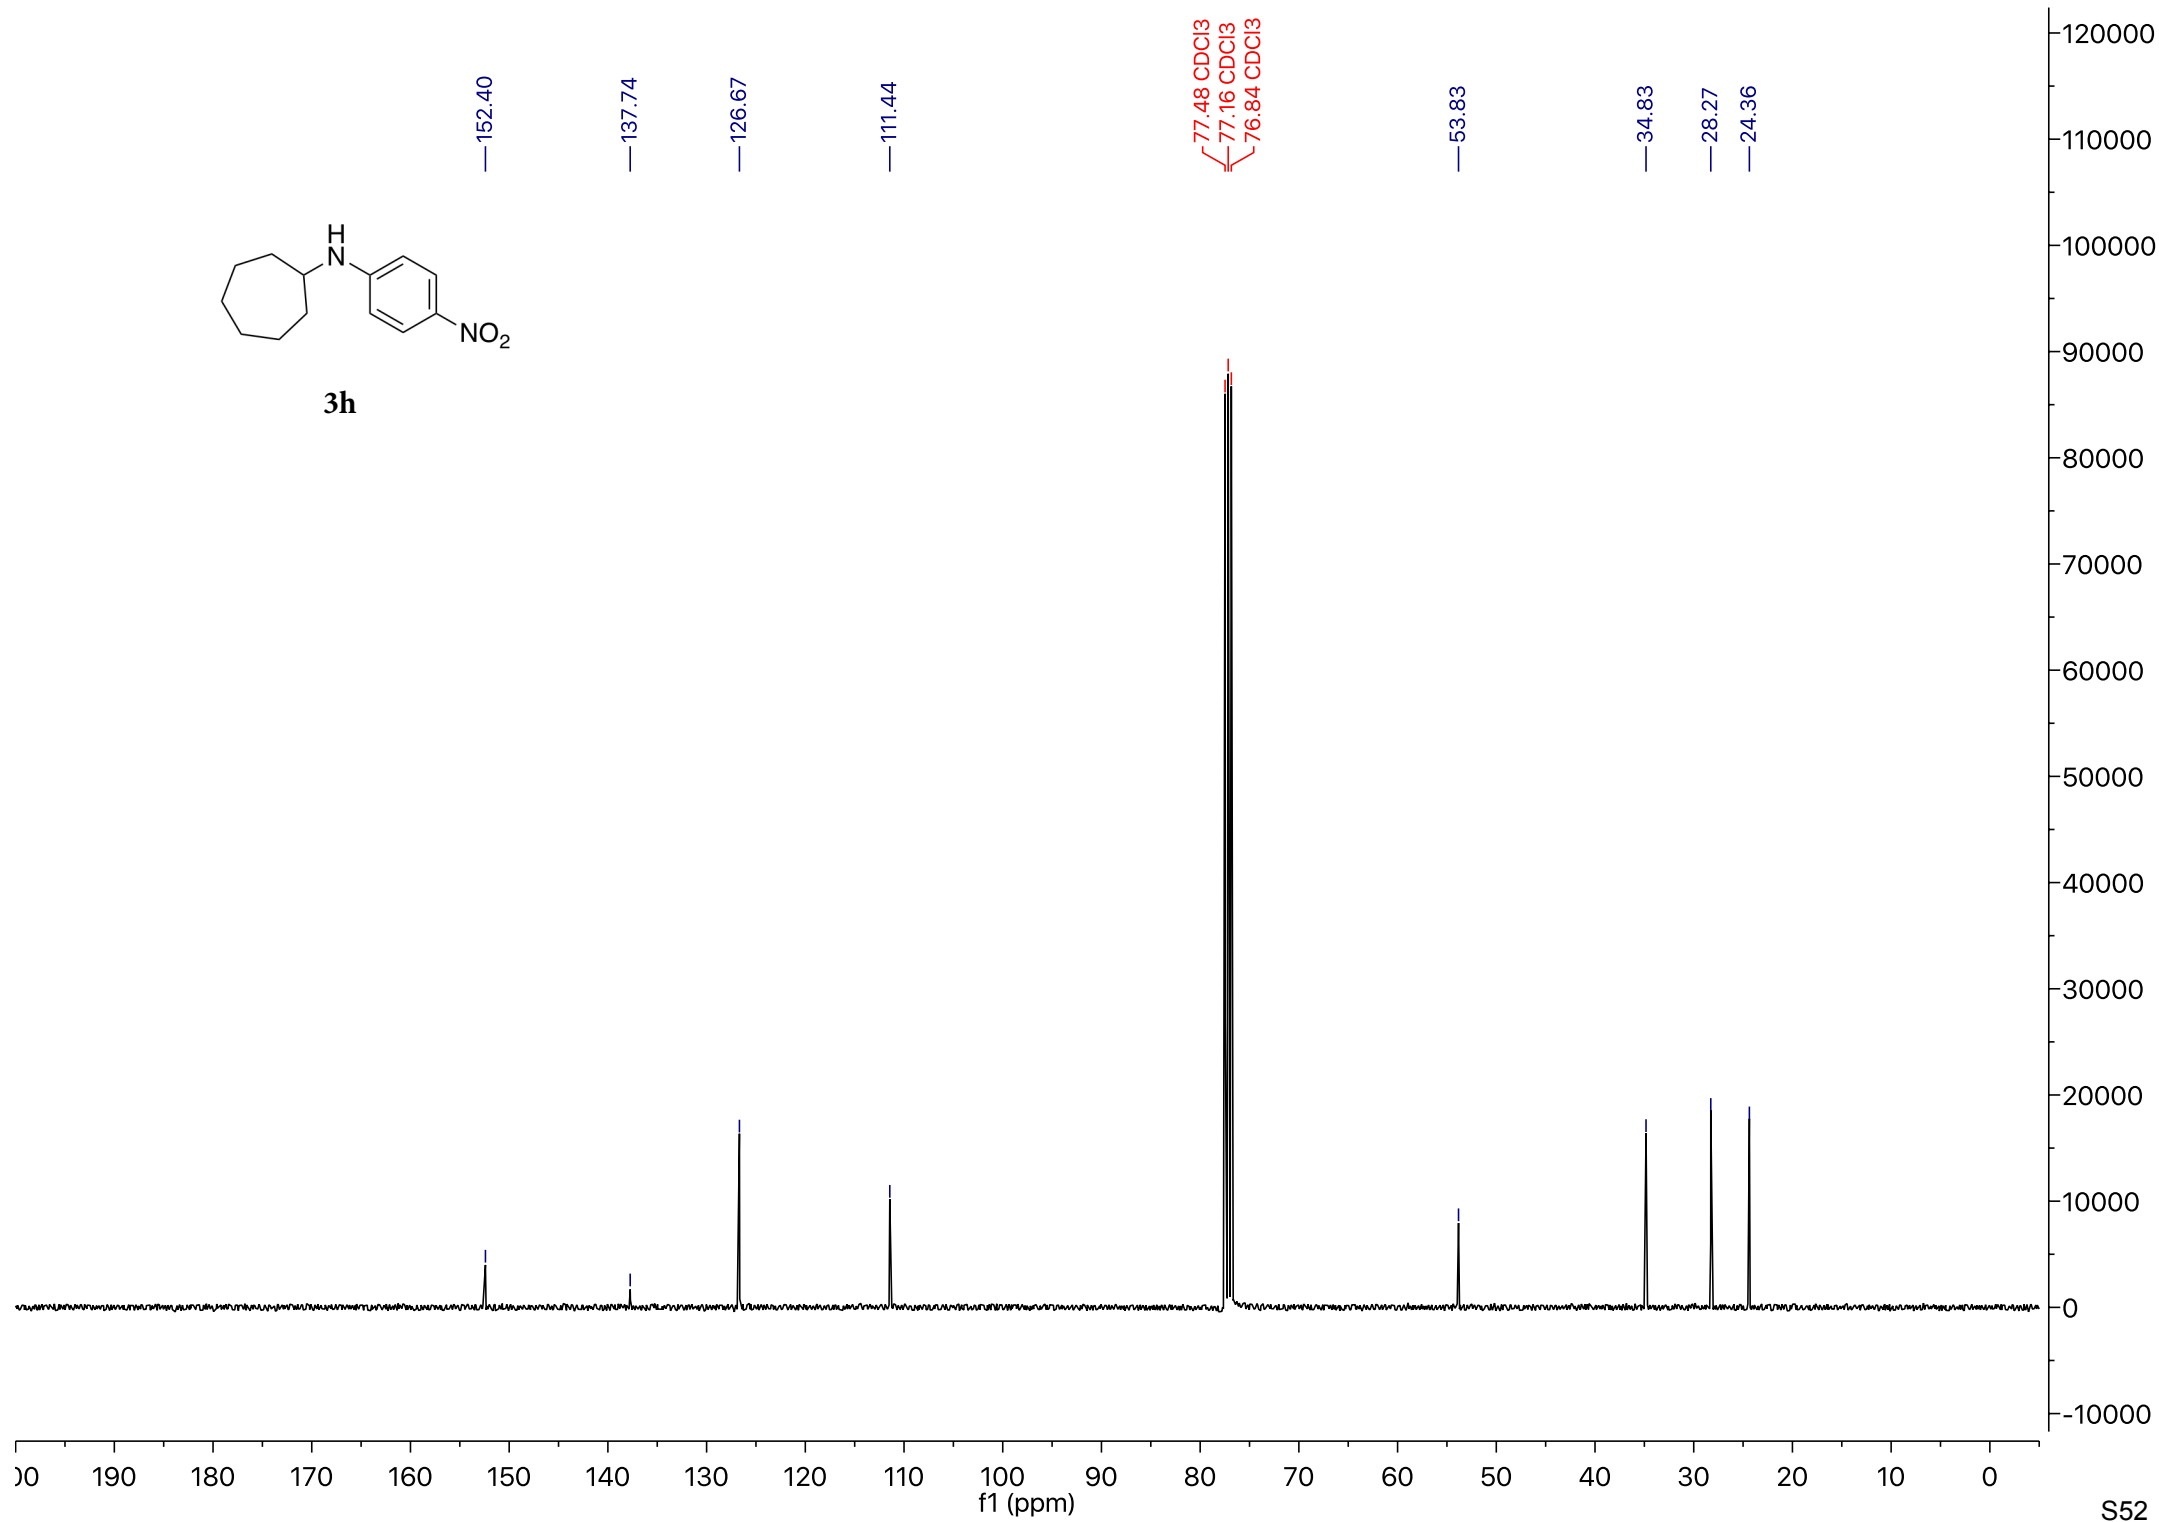

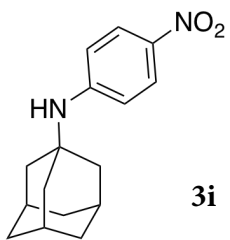

**3i**

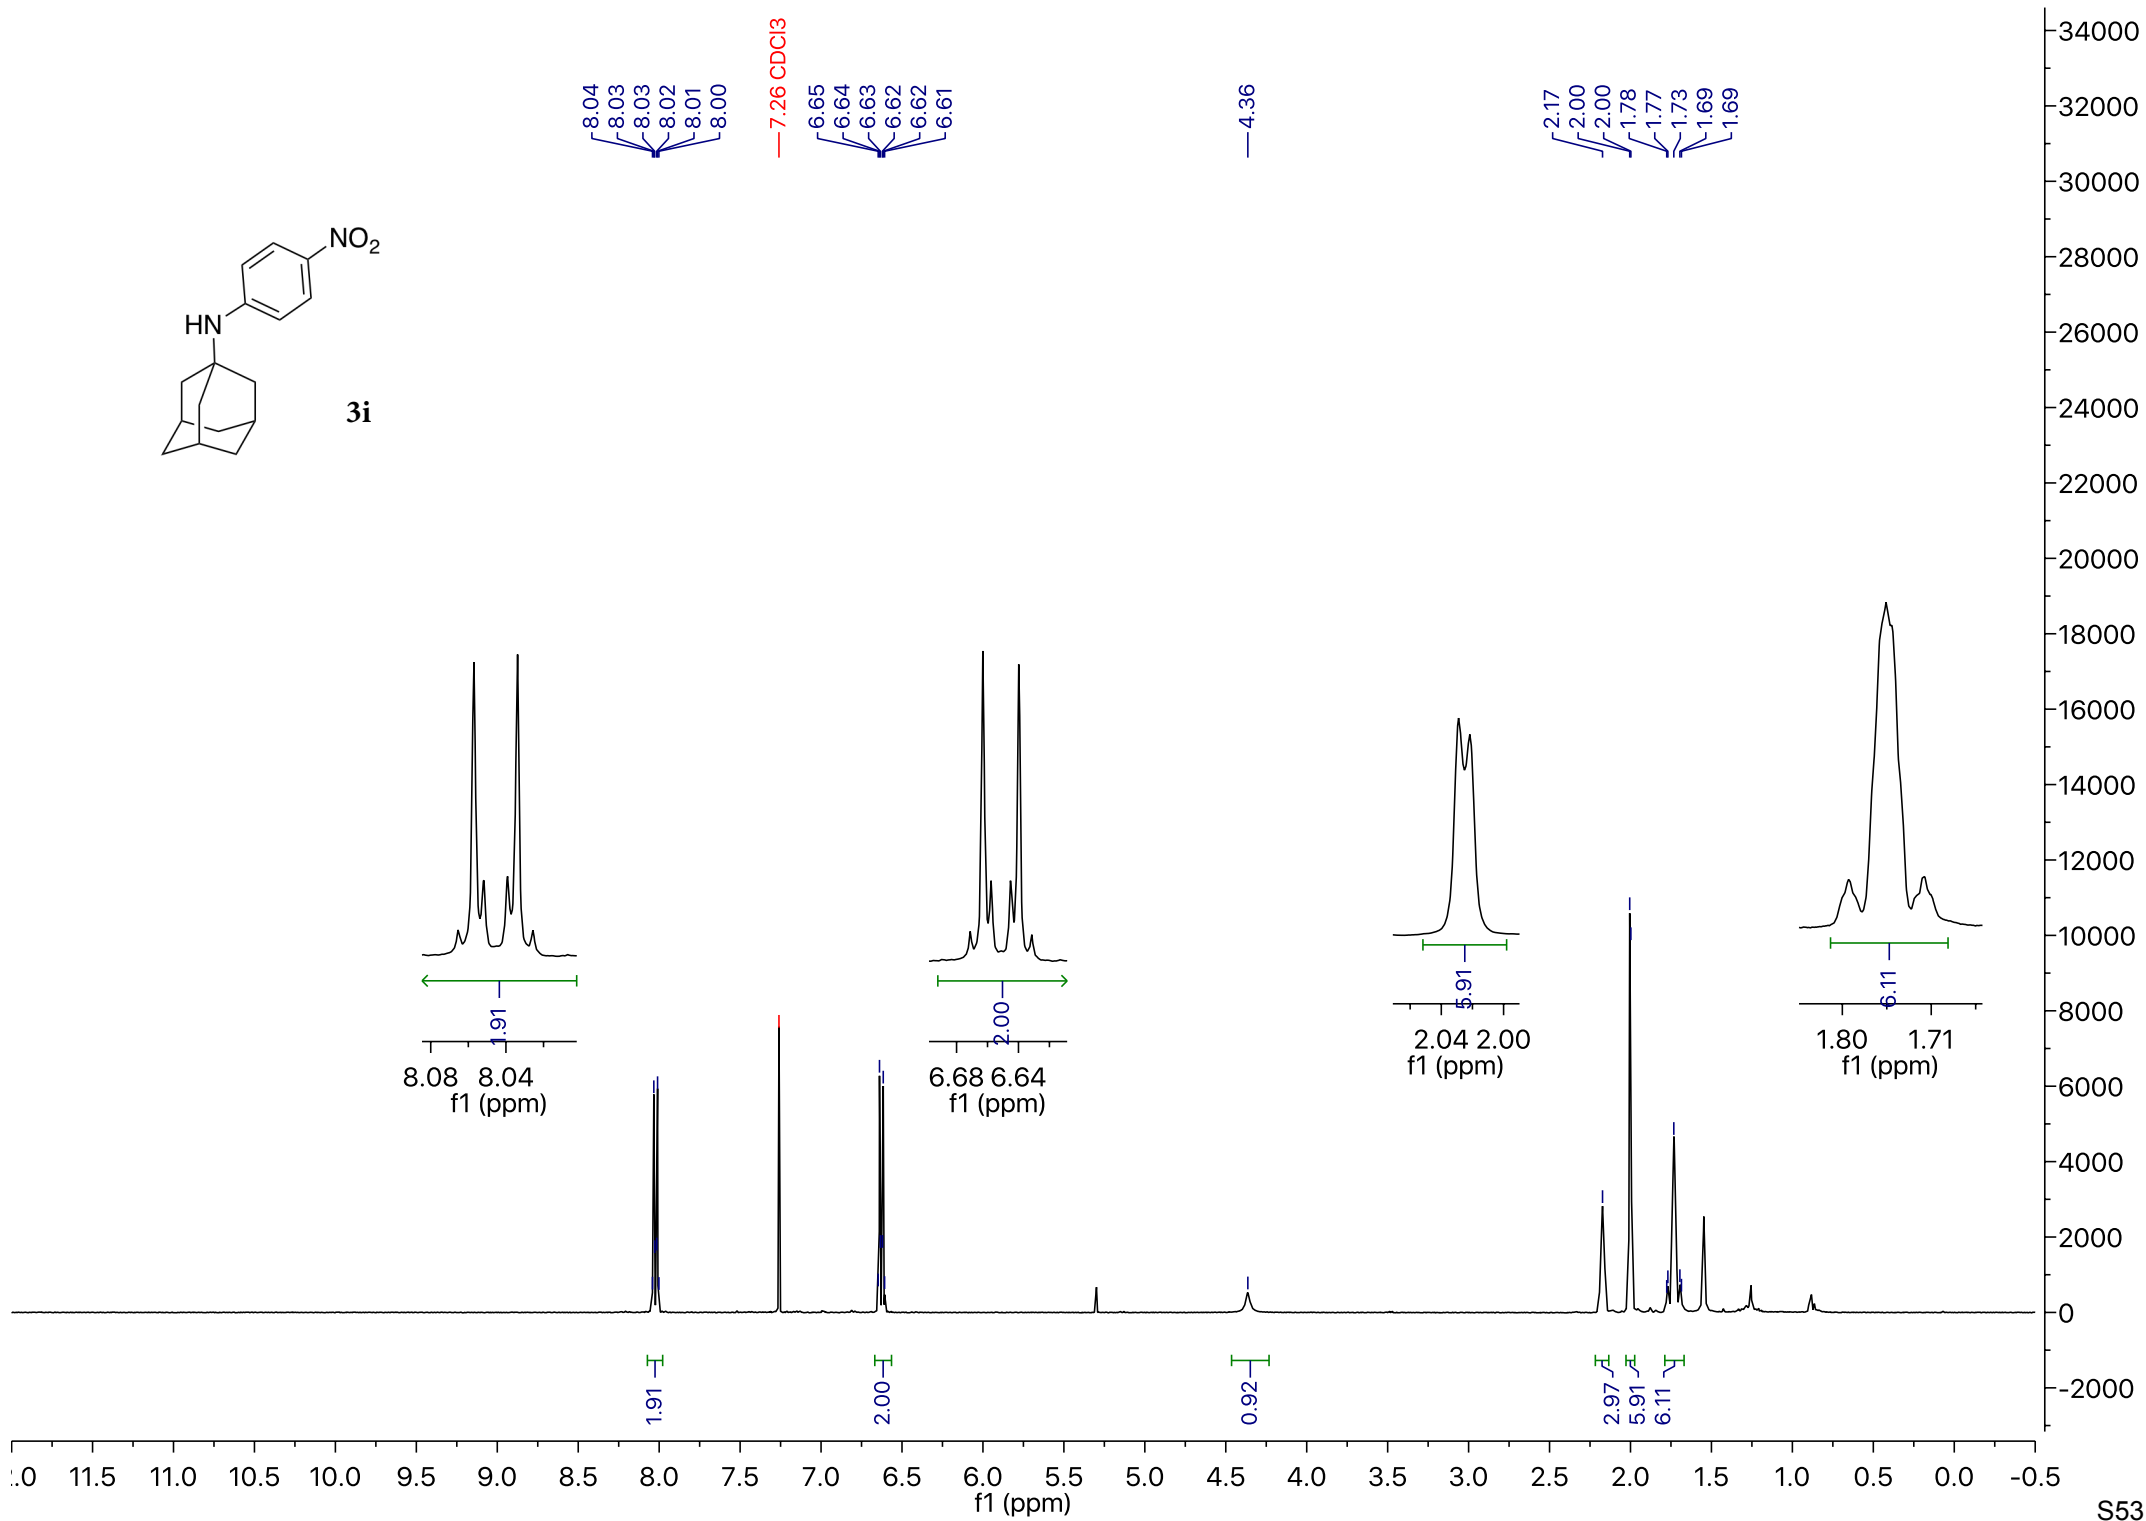

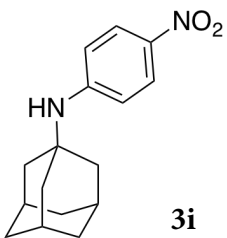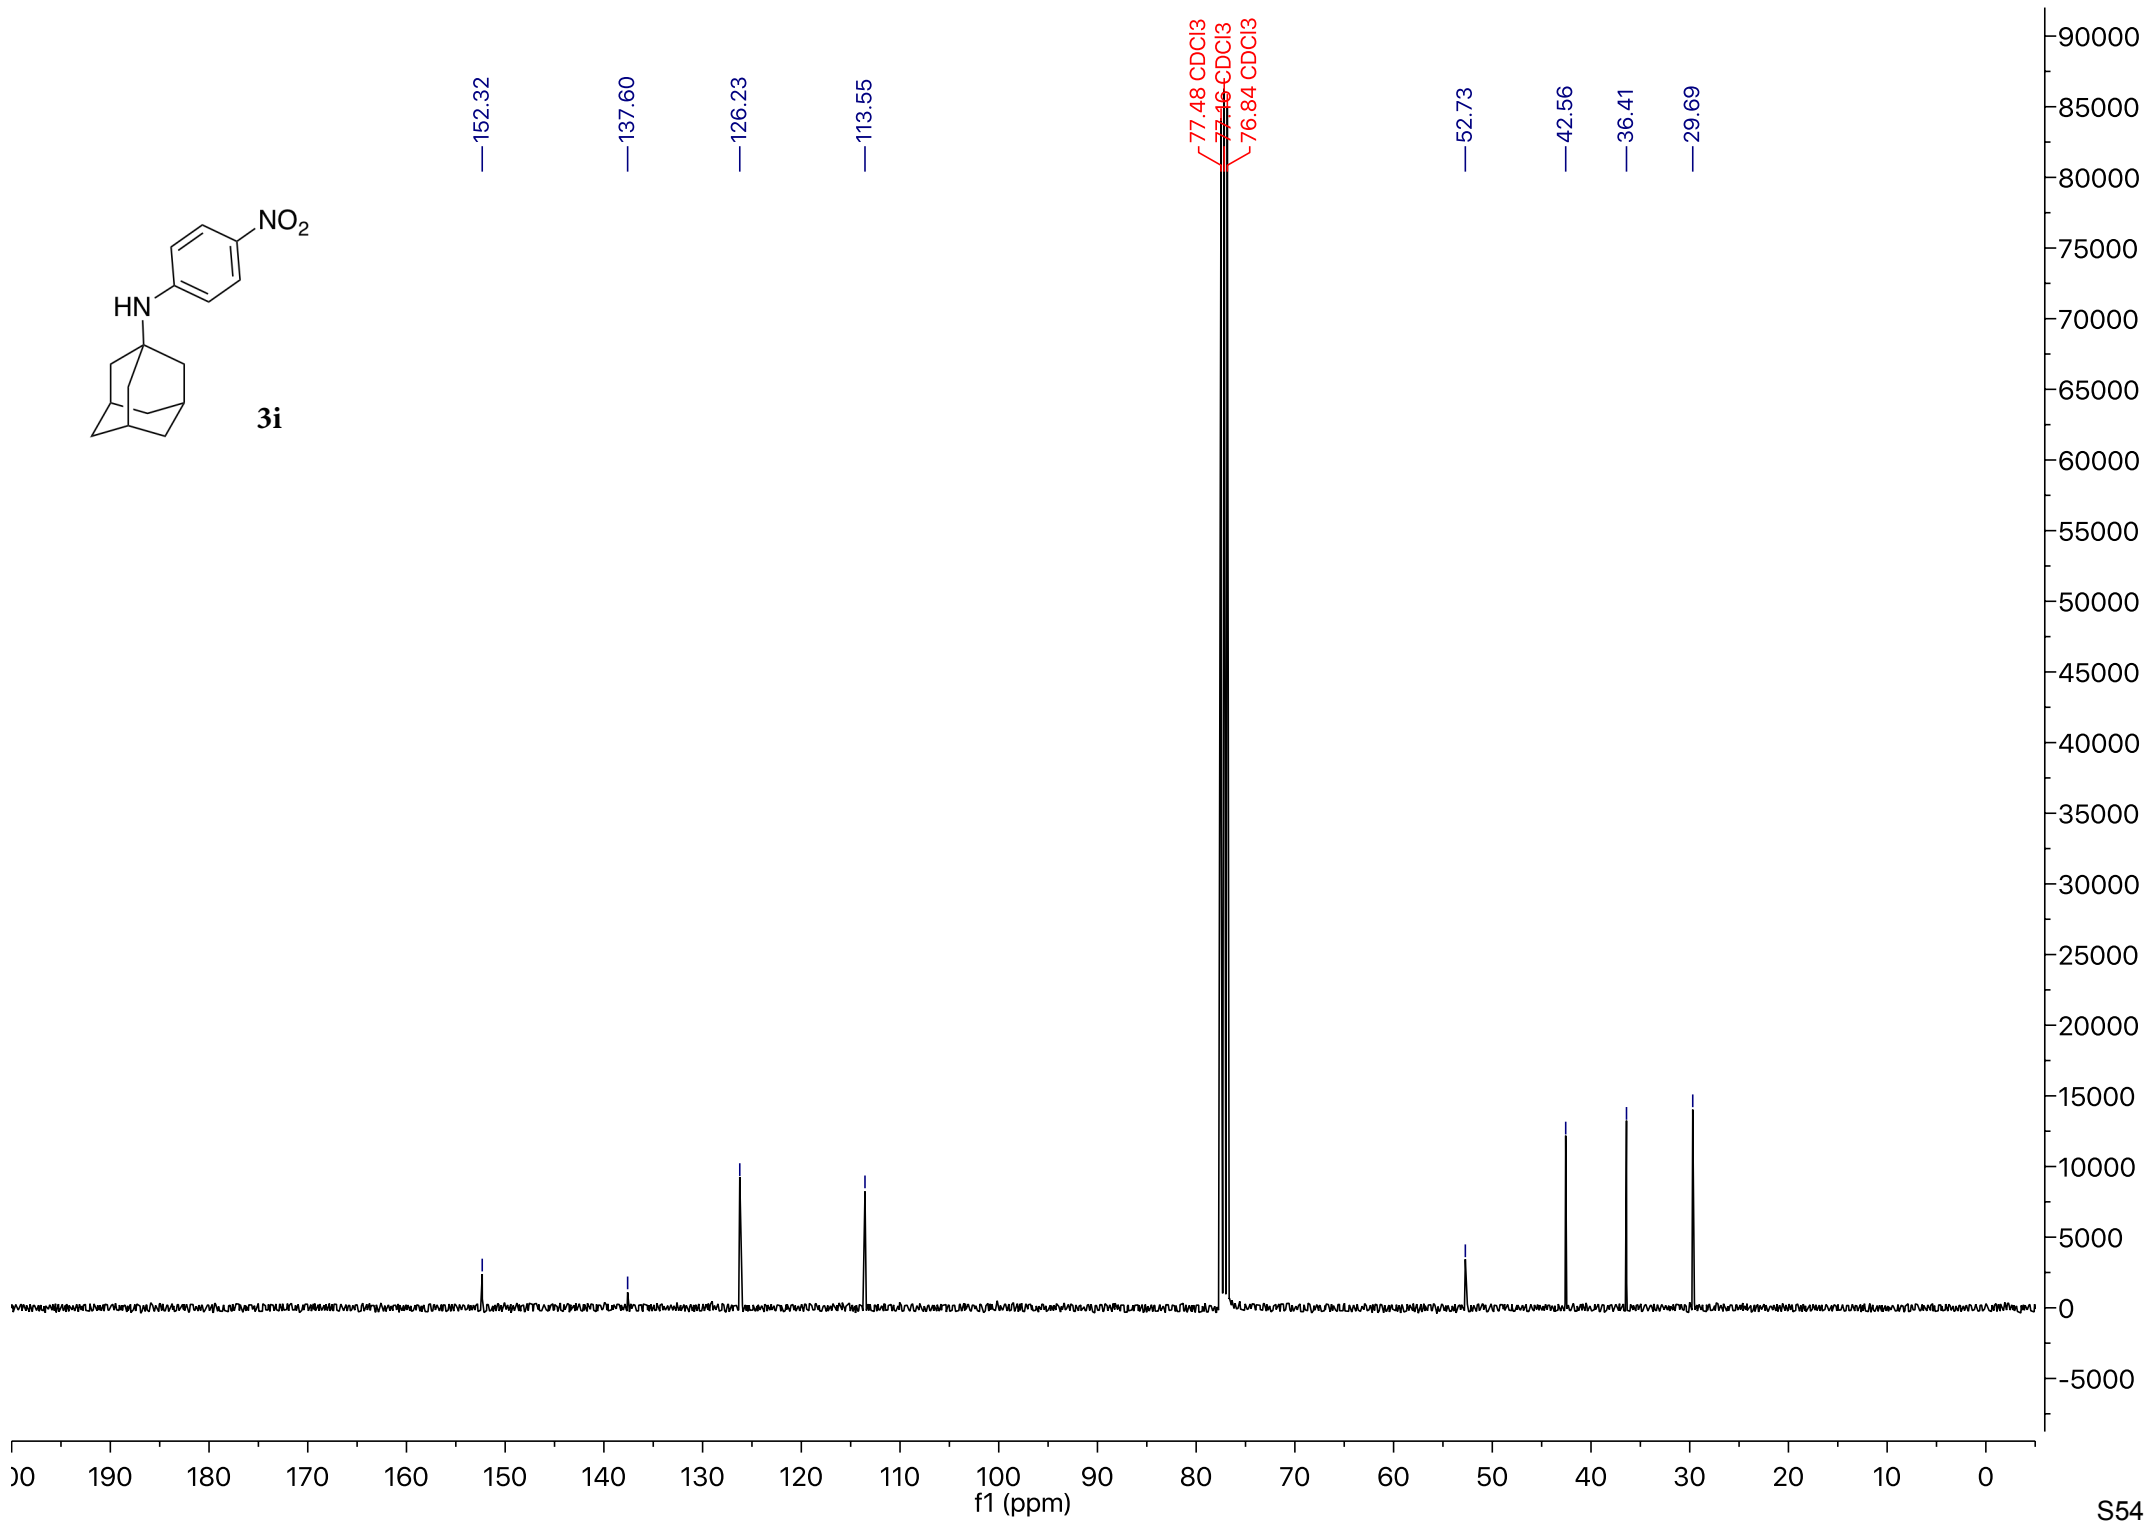

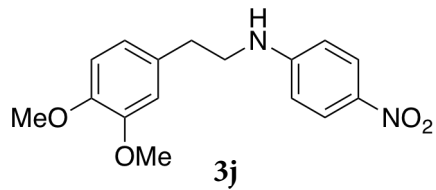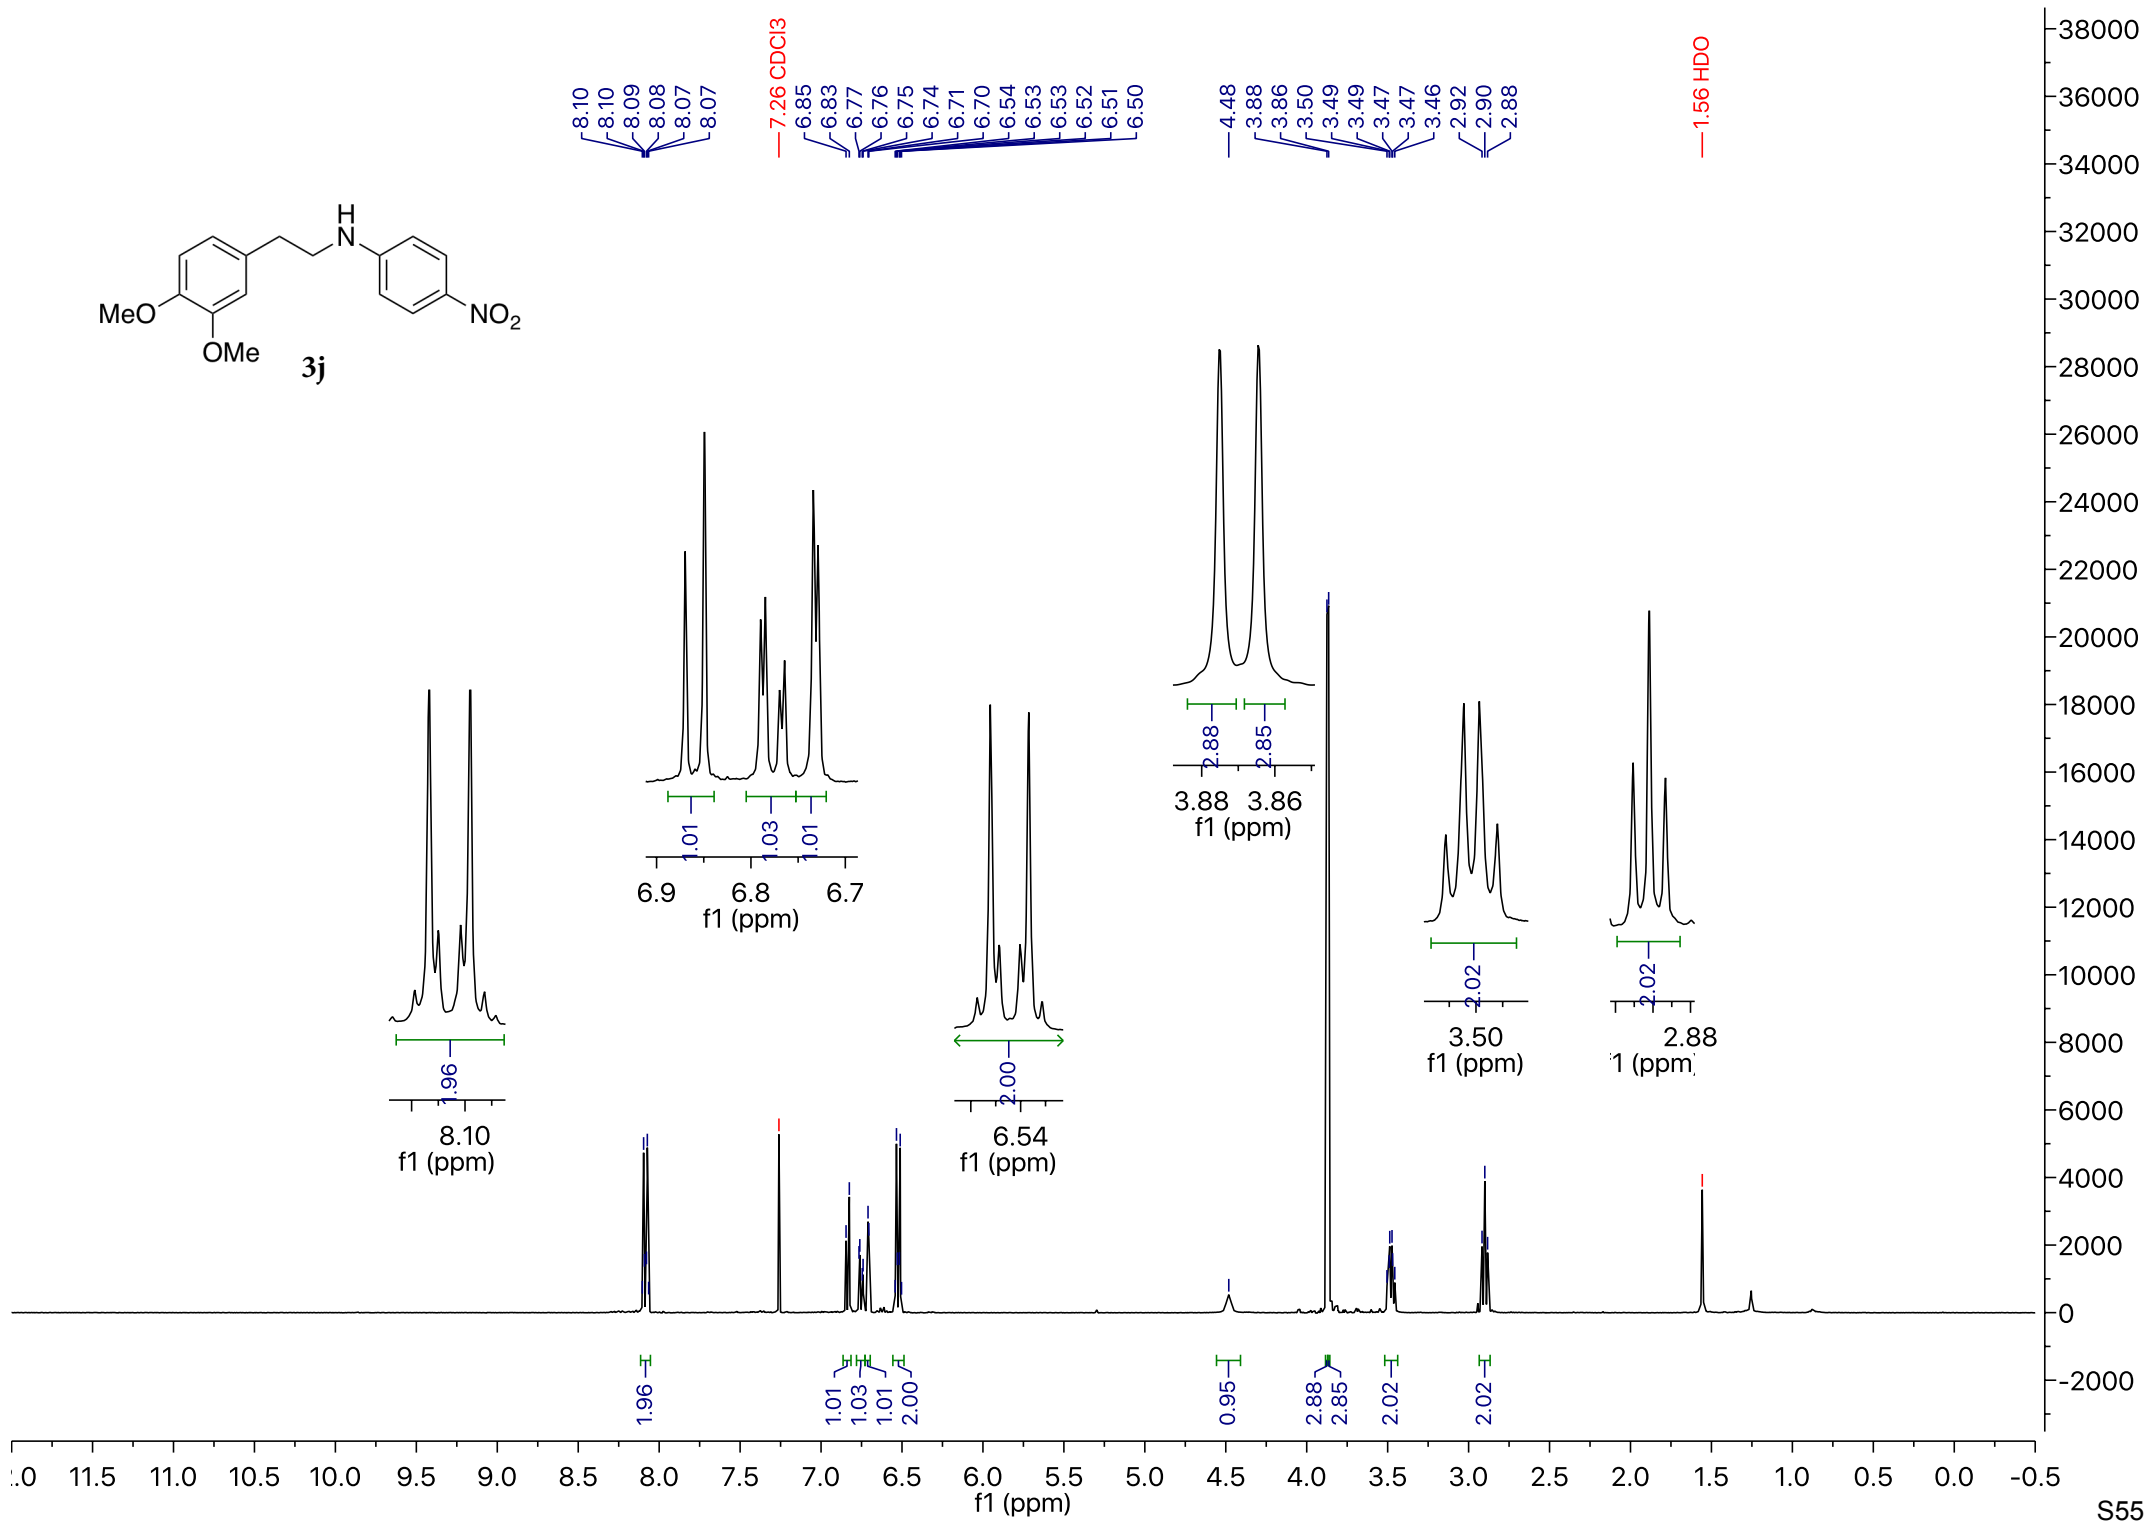

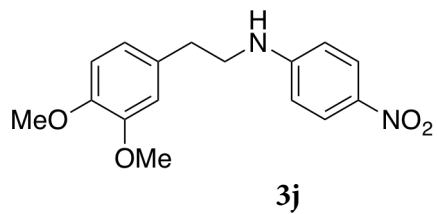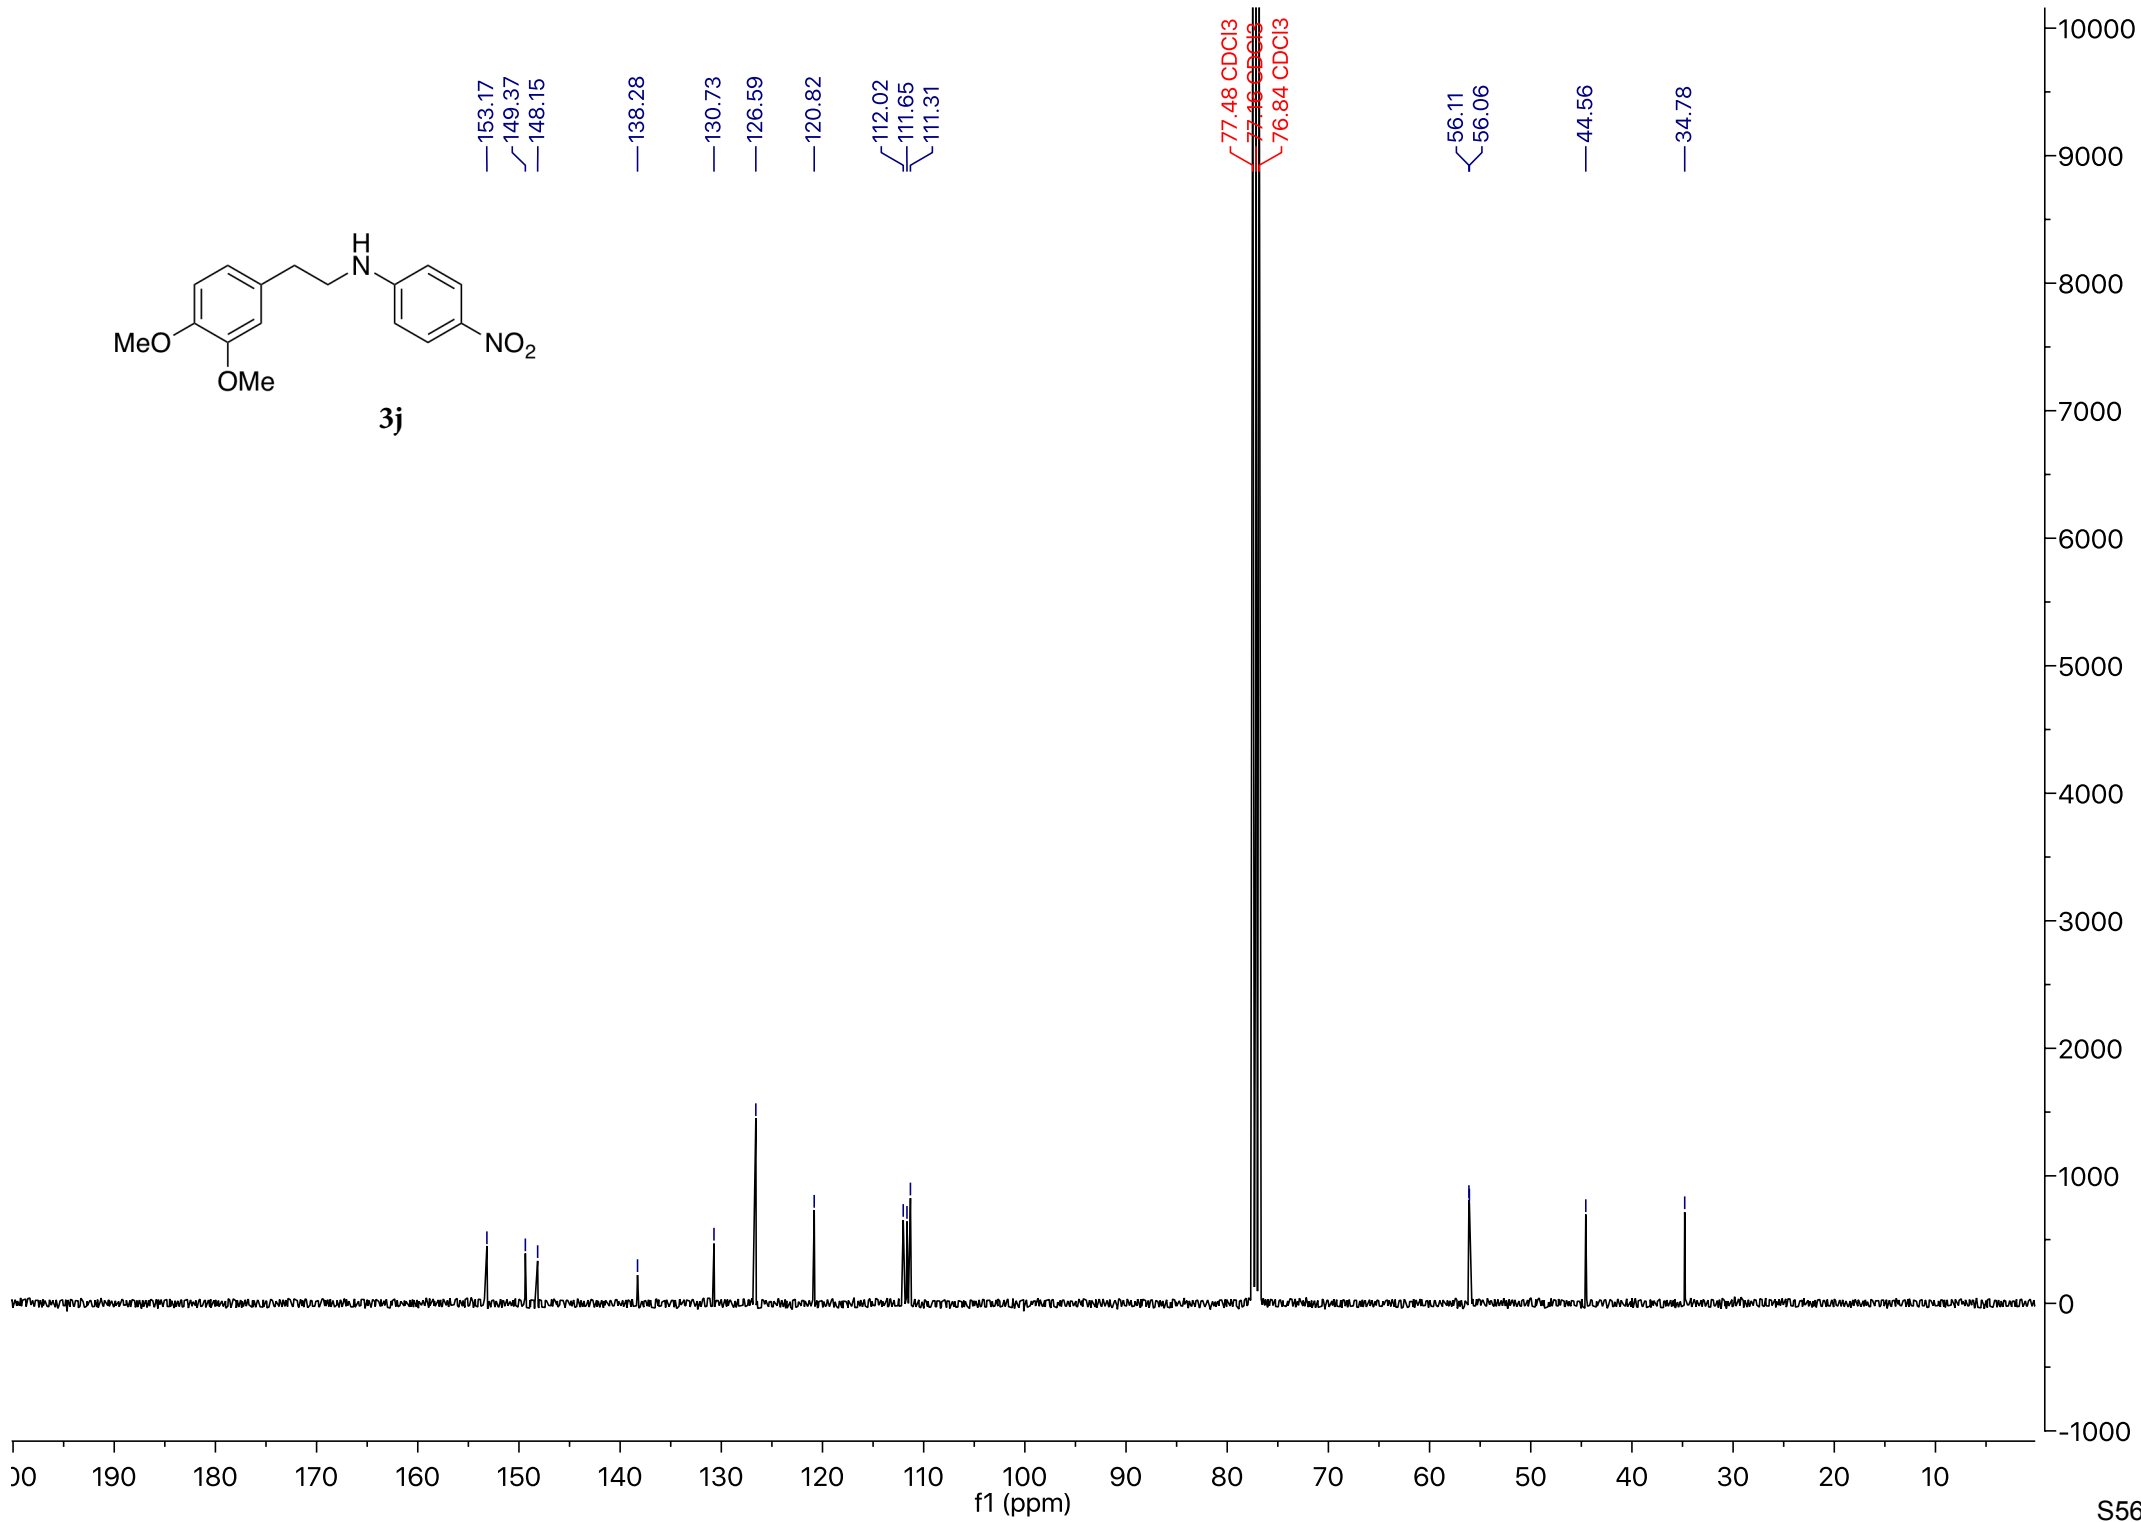

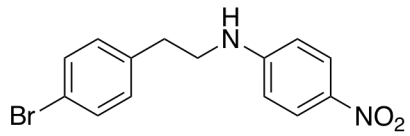

3k

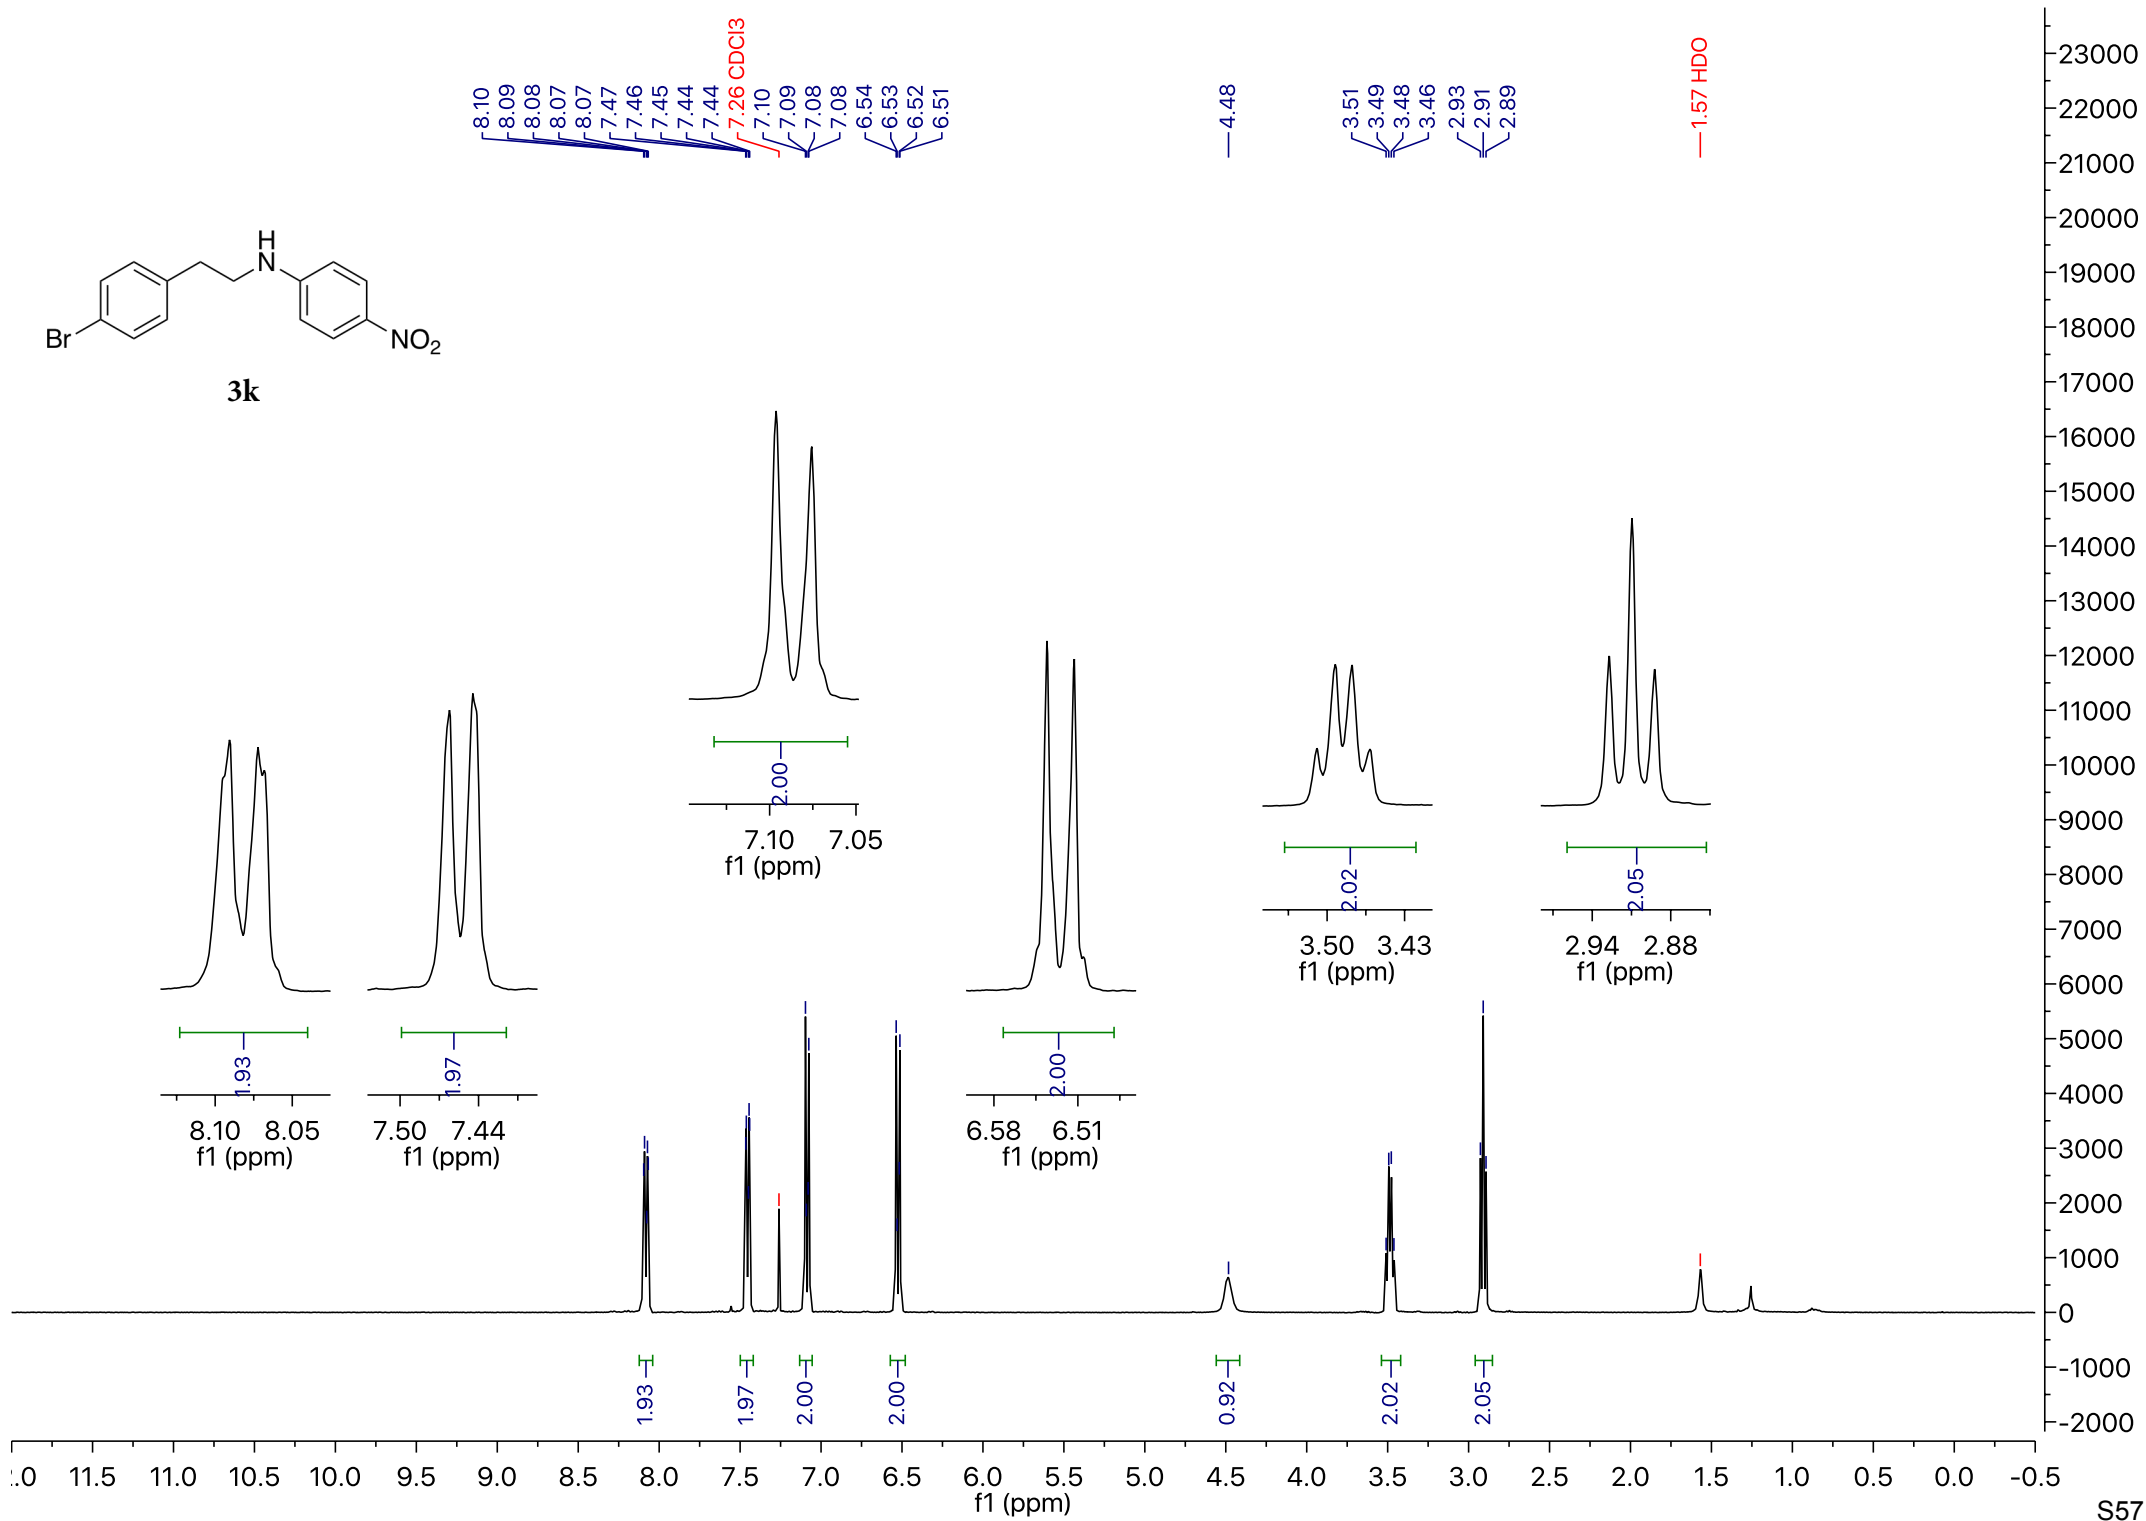

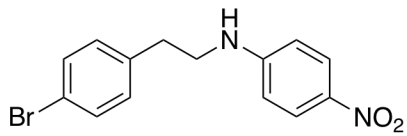

3k

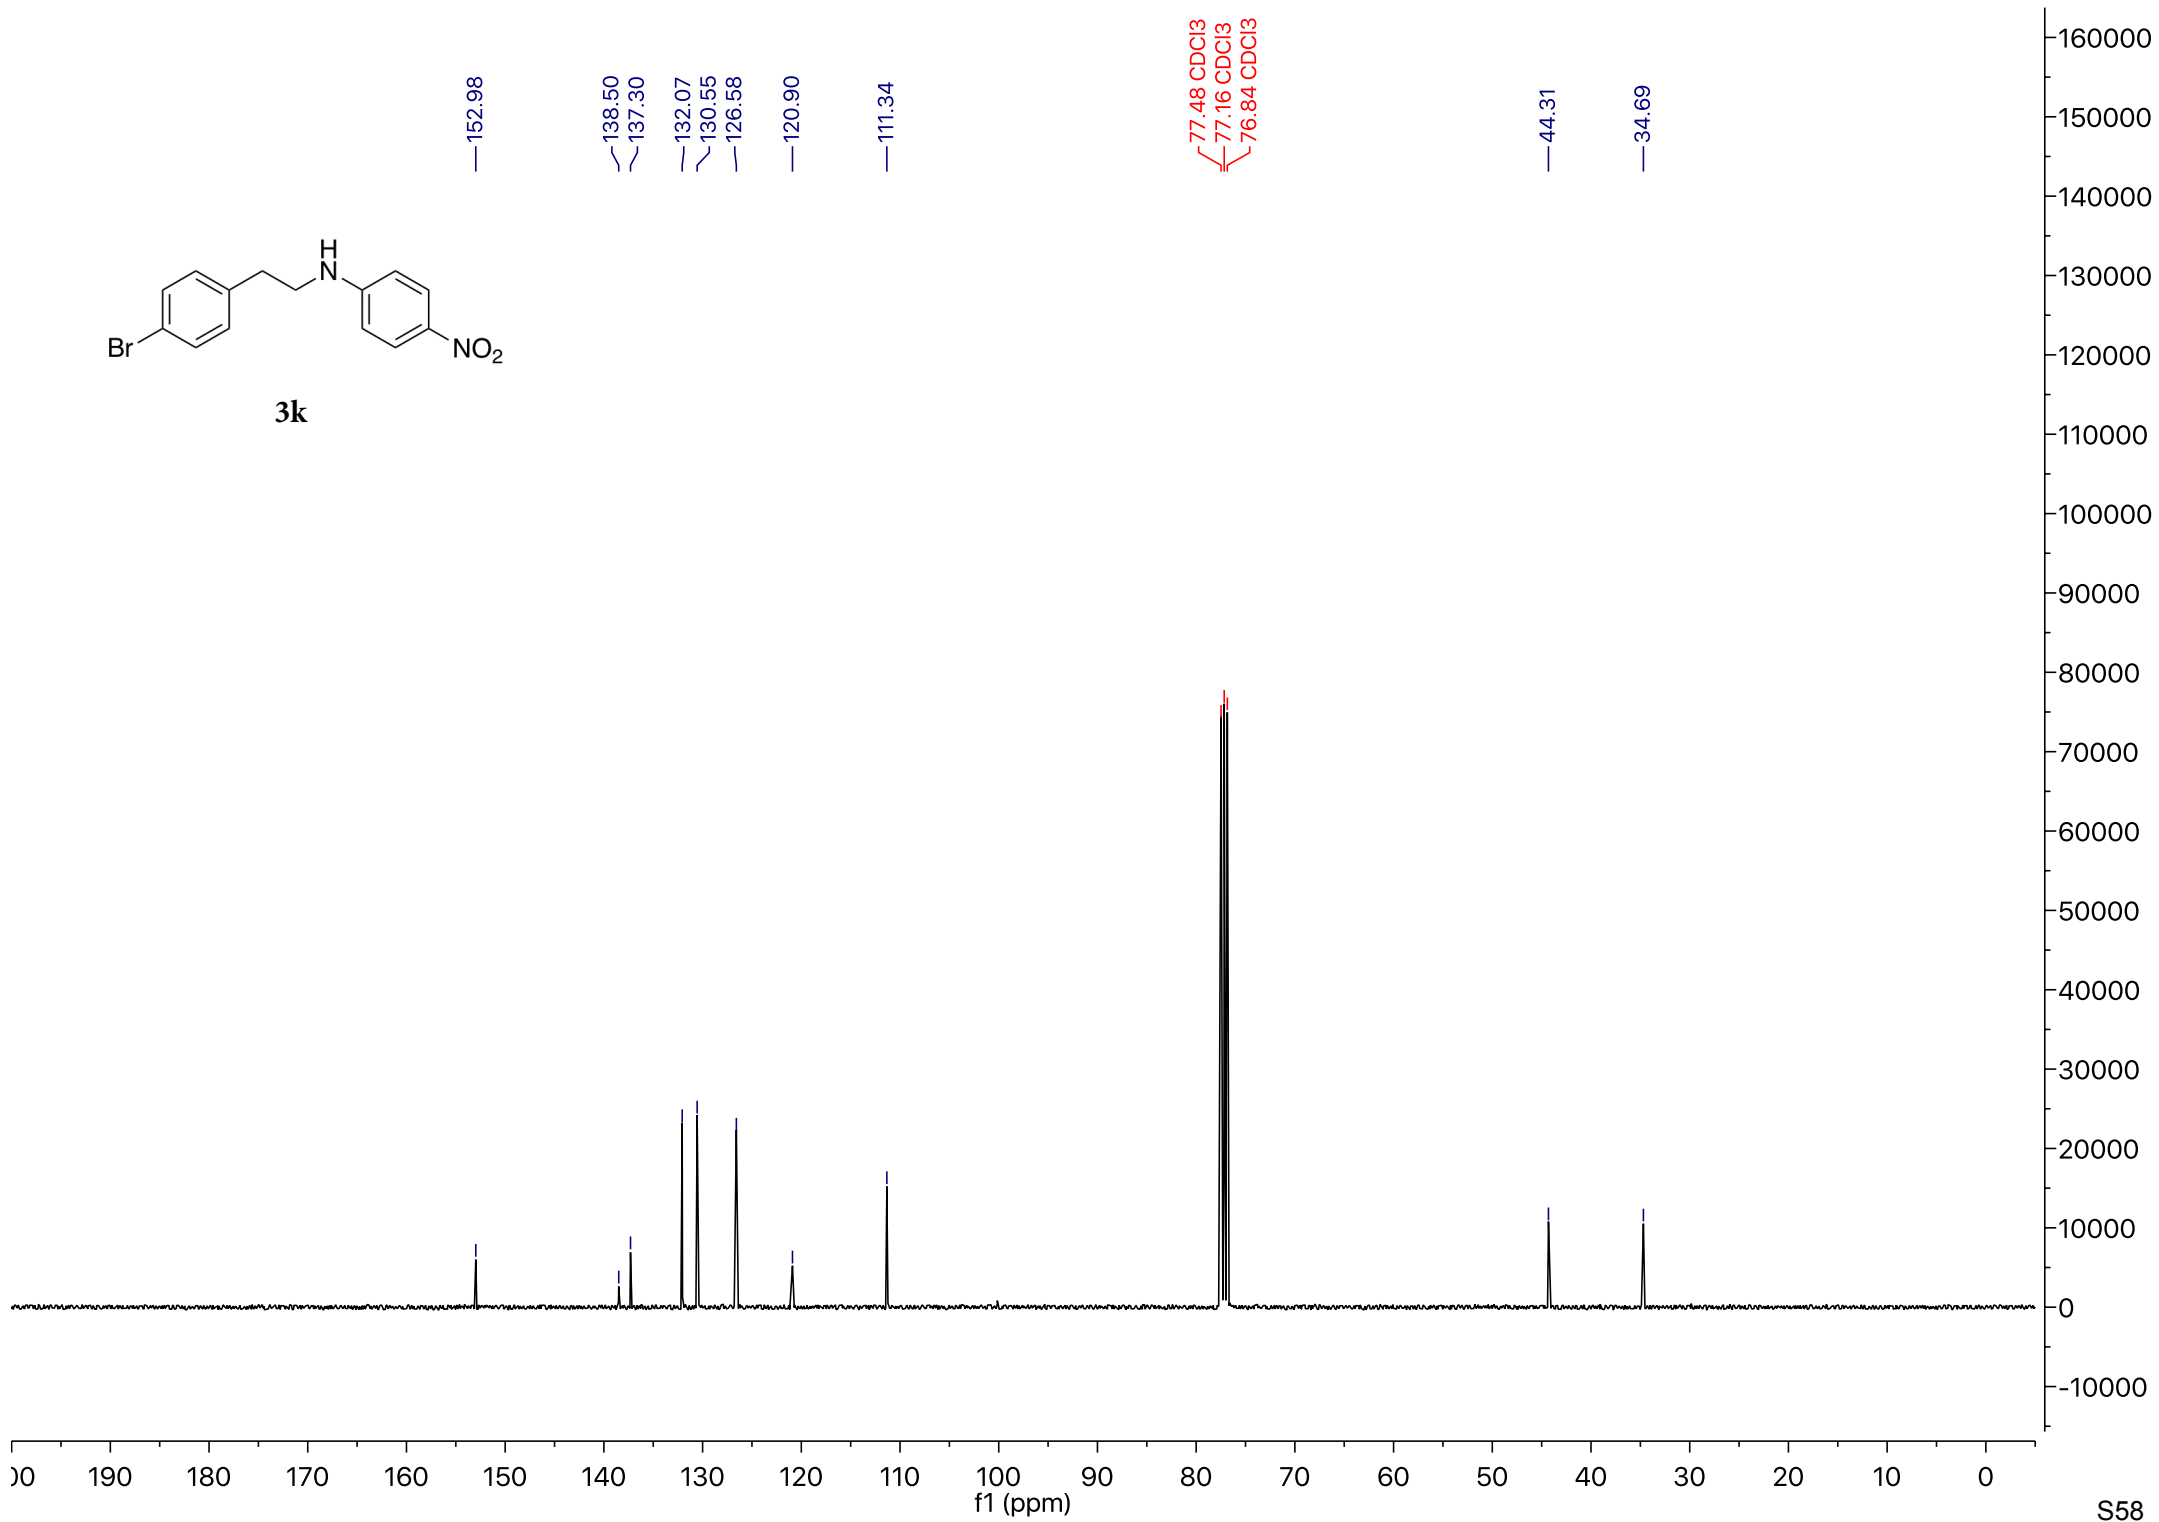

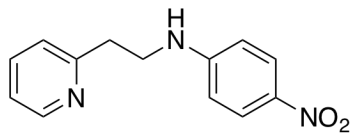

31

8.58  
8.57  
8.57  
8.56  
8.56  
8.09  
8.08  
8.07  
8.06  
8.06  
8.05  
7.67  
7.67  
7.65  
7.65  
7.64  
7.63  
7.26 CDCl3  
7.22  
7.21  
7.21  
7.20  
7.20  
7.20  
7.19  
7.19  
6.56  
6.55  
6.54  
6.53  
6.53  
6.52  
5.48

3.64  
3.62  
3.61  
3.14  
3.12  
3.11

1.82 HDO

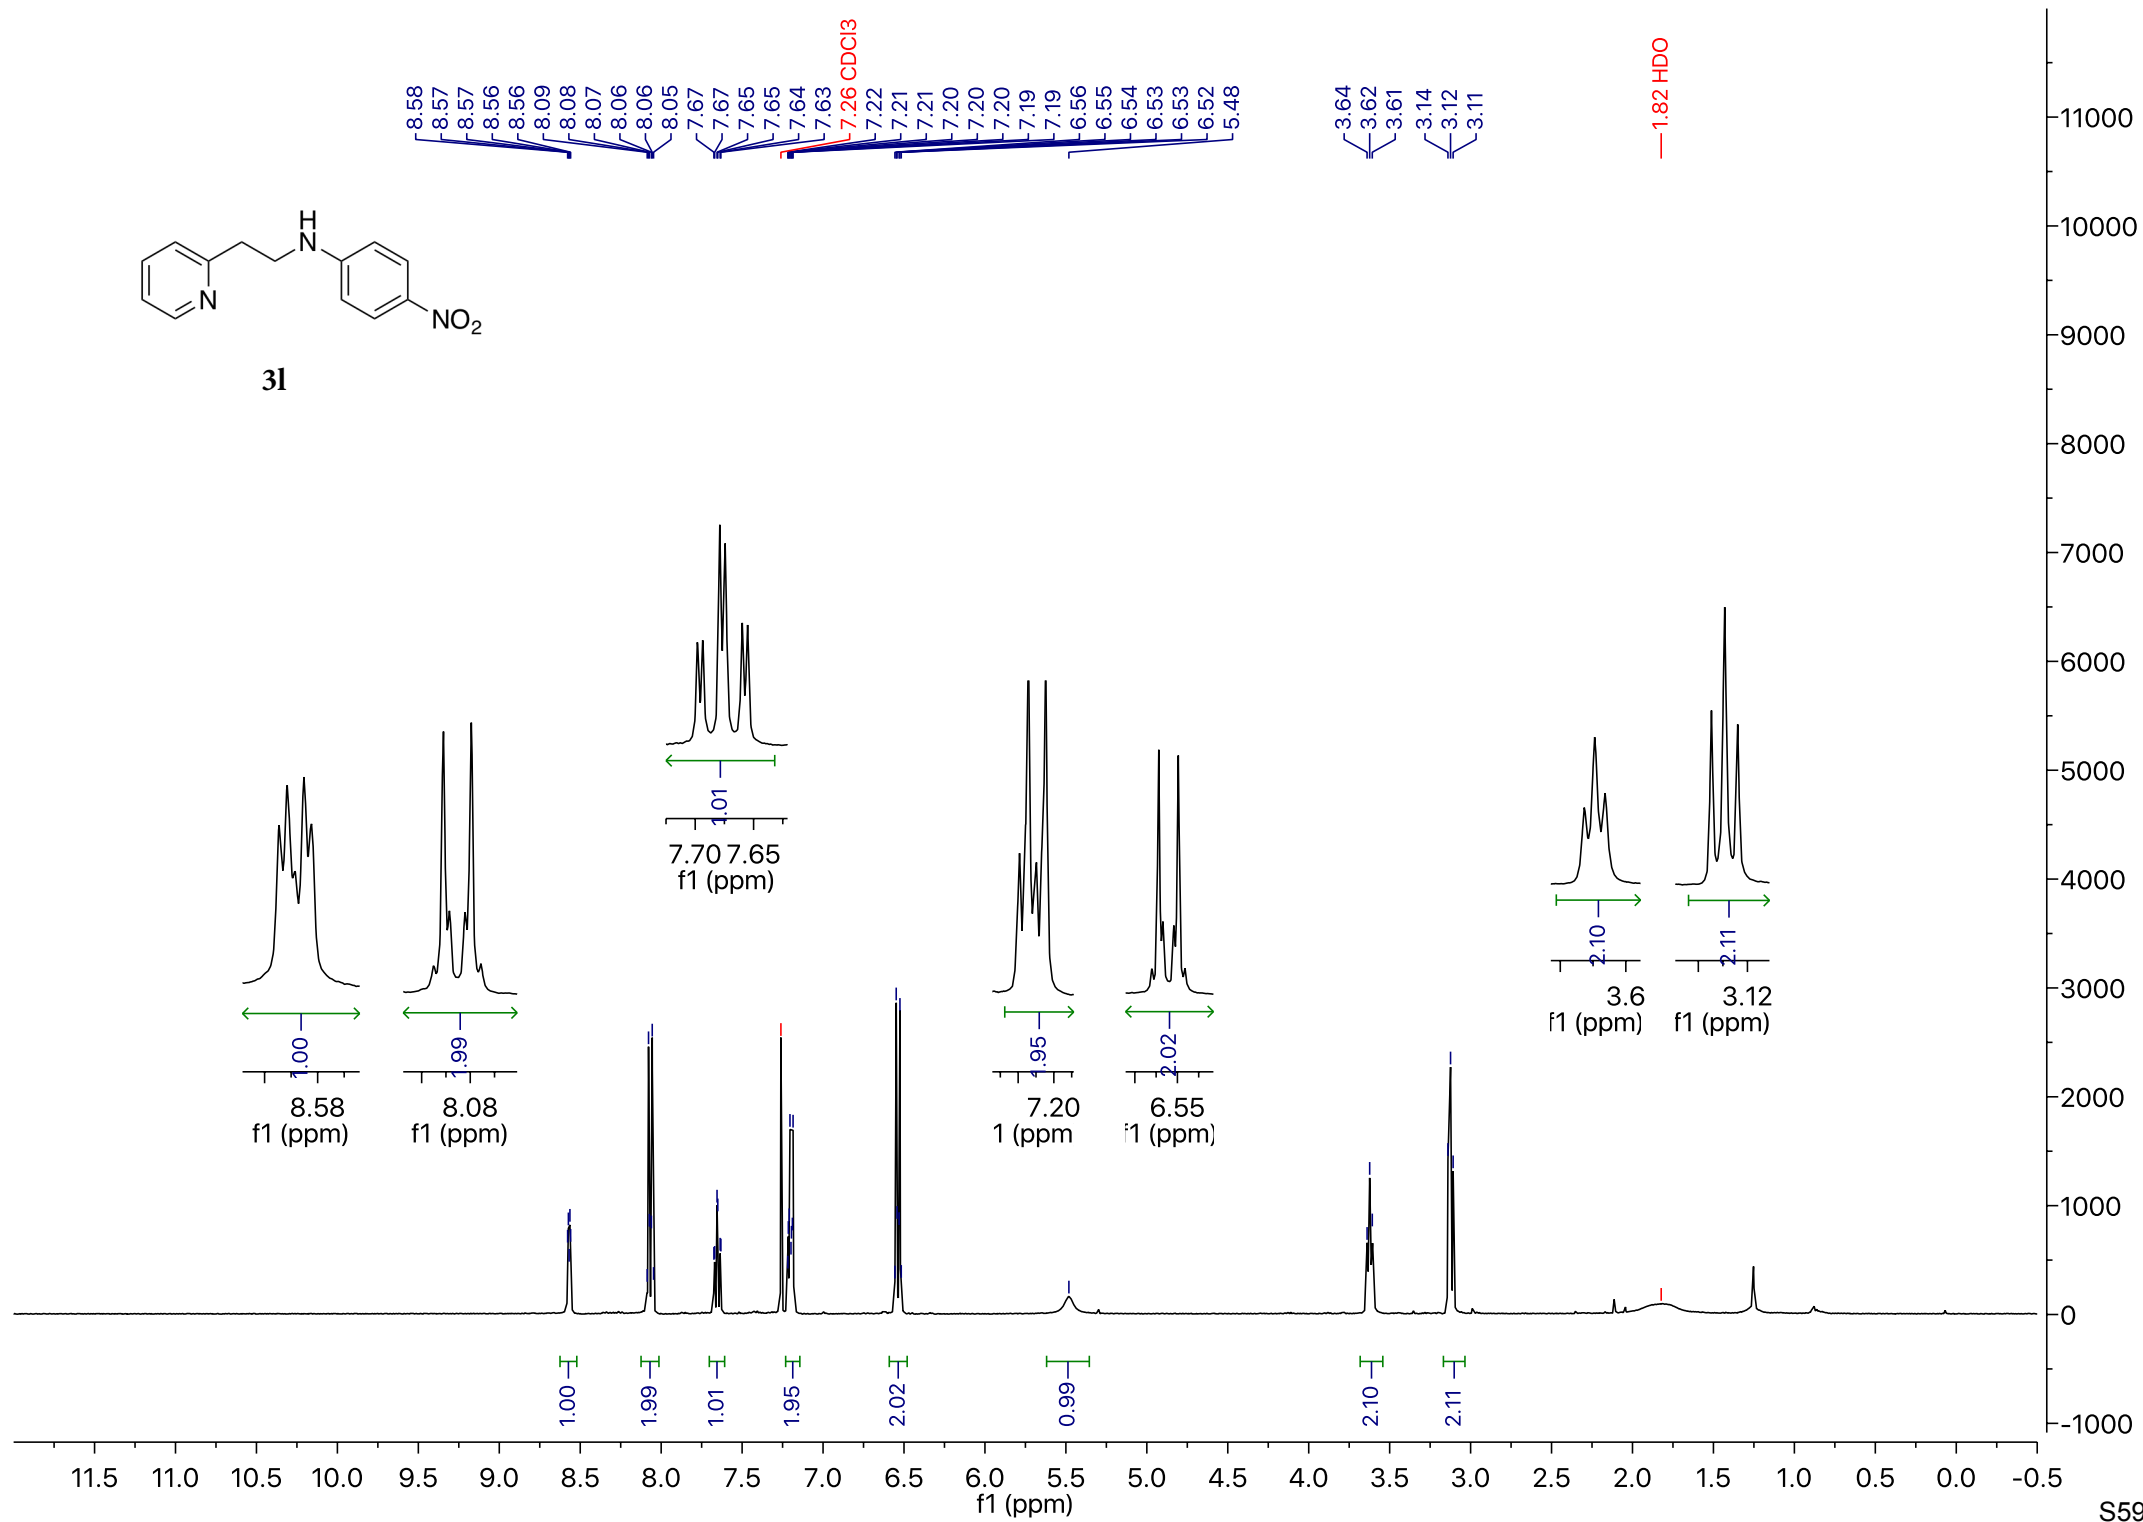



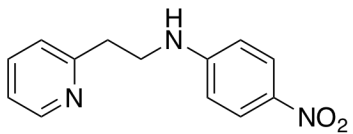

3l

159.09

153.44

149.50

138.00

137.02

126.57

123.58

122.03

111.18

77.48 CDCl3

77.46 CDCl3

76.84 CDCl3

42.90

36.67

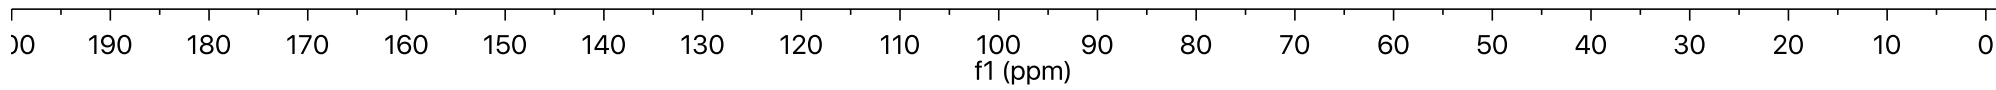

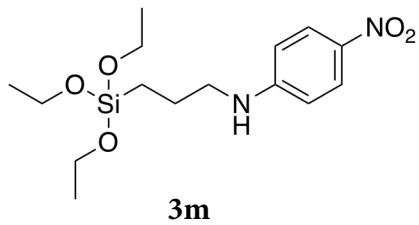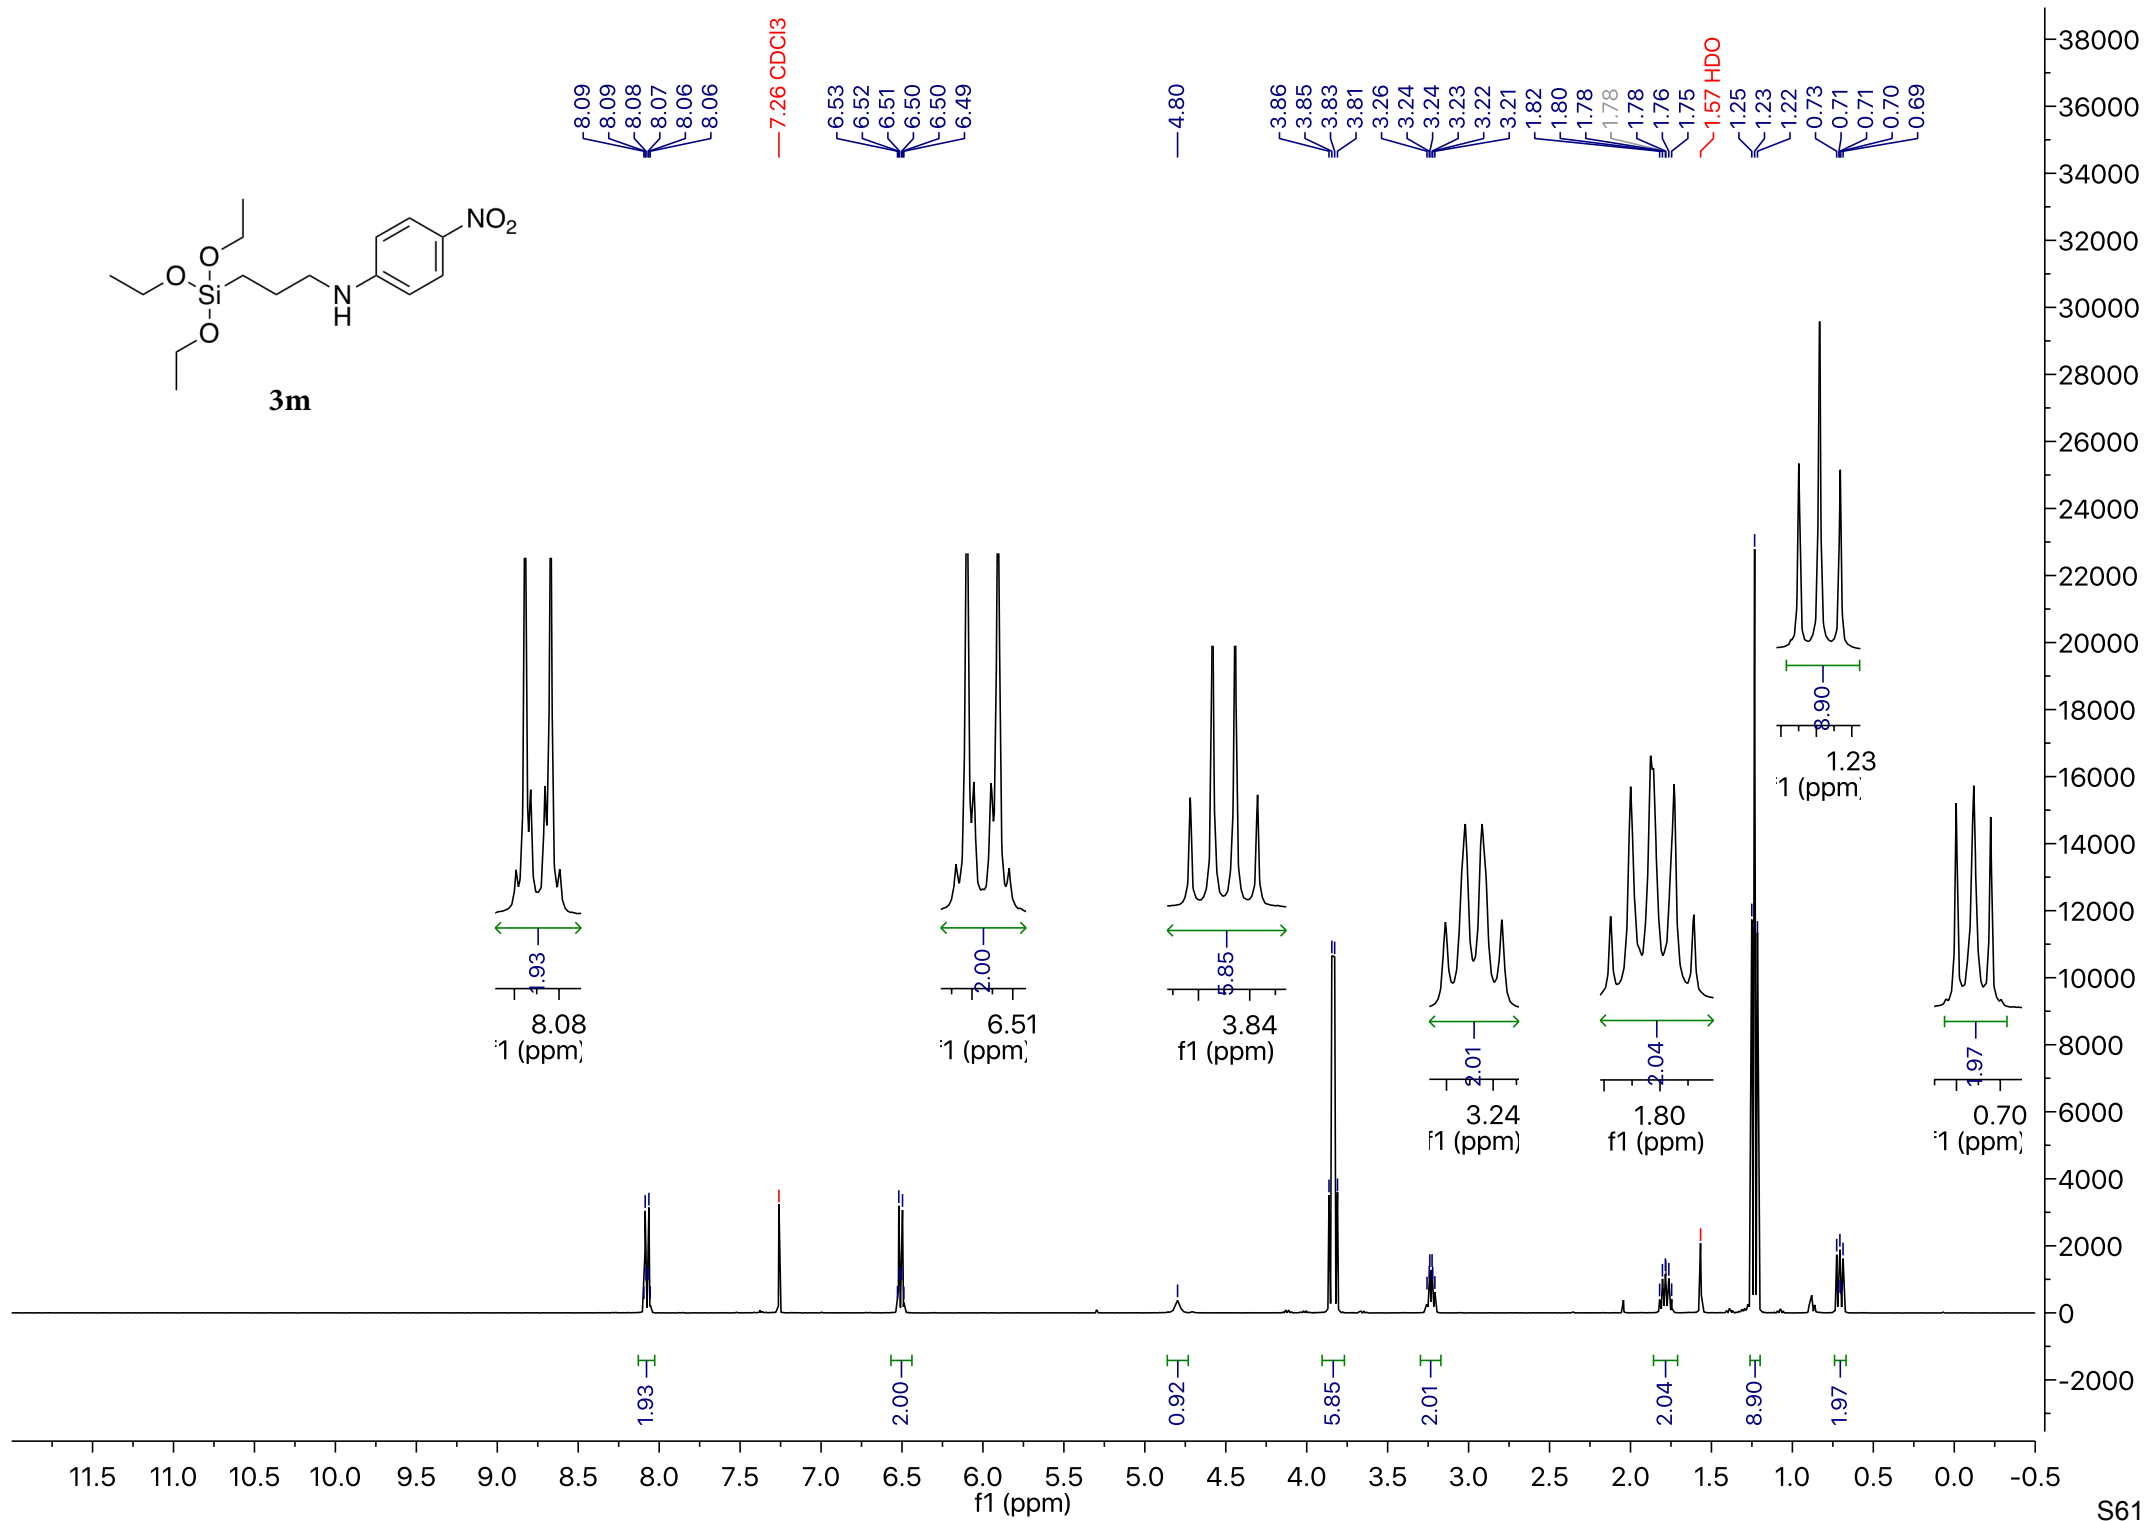

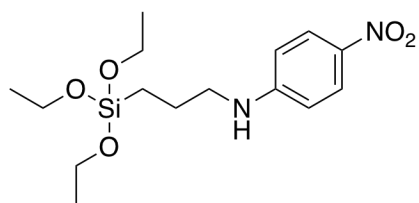

3m

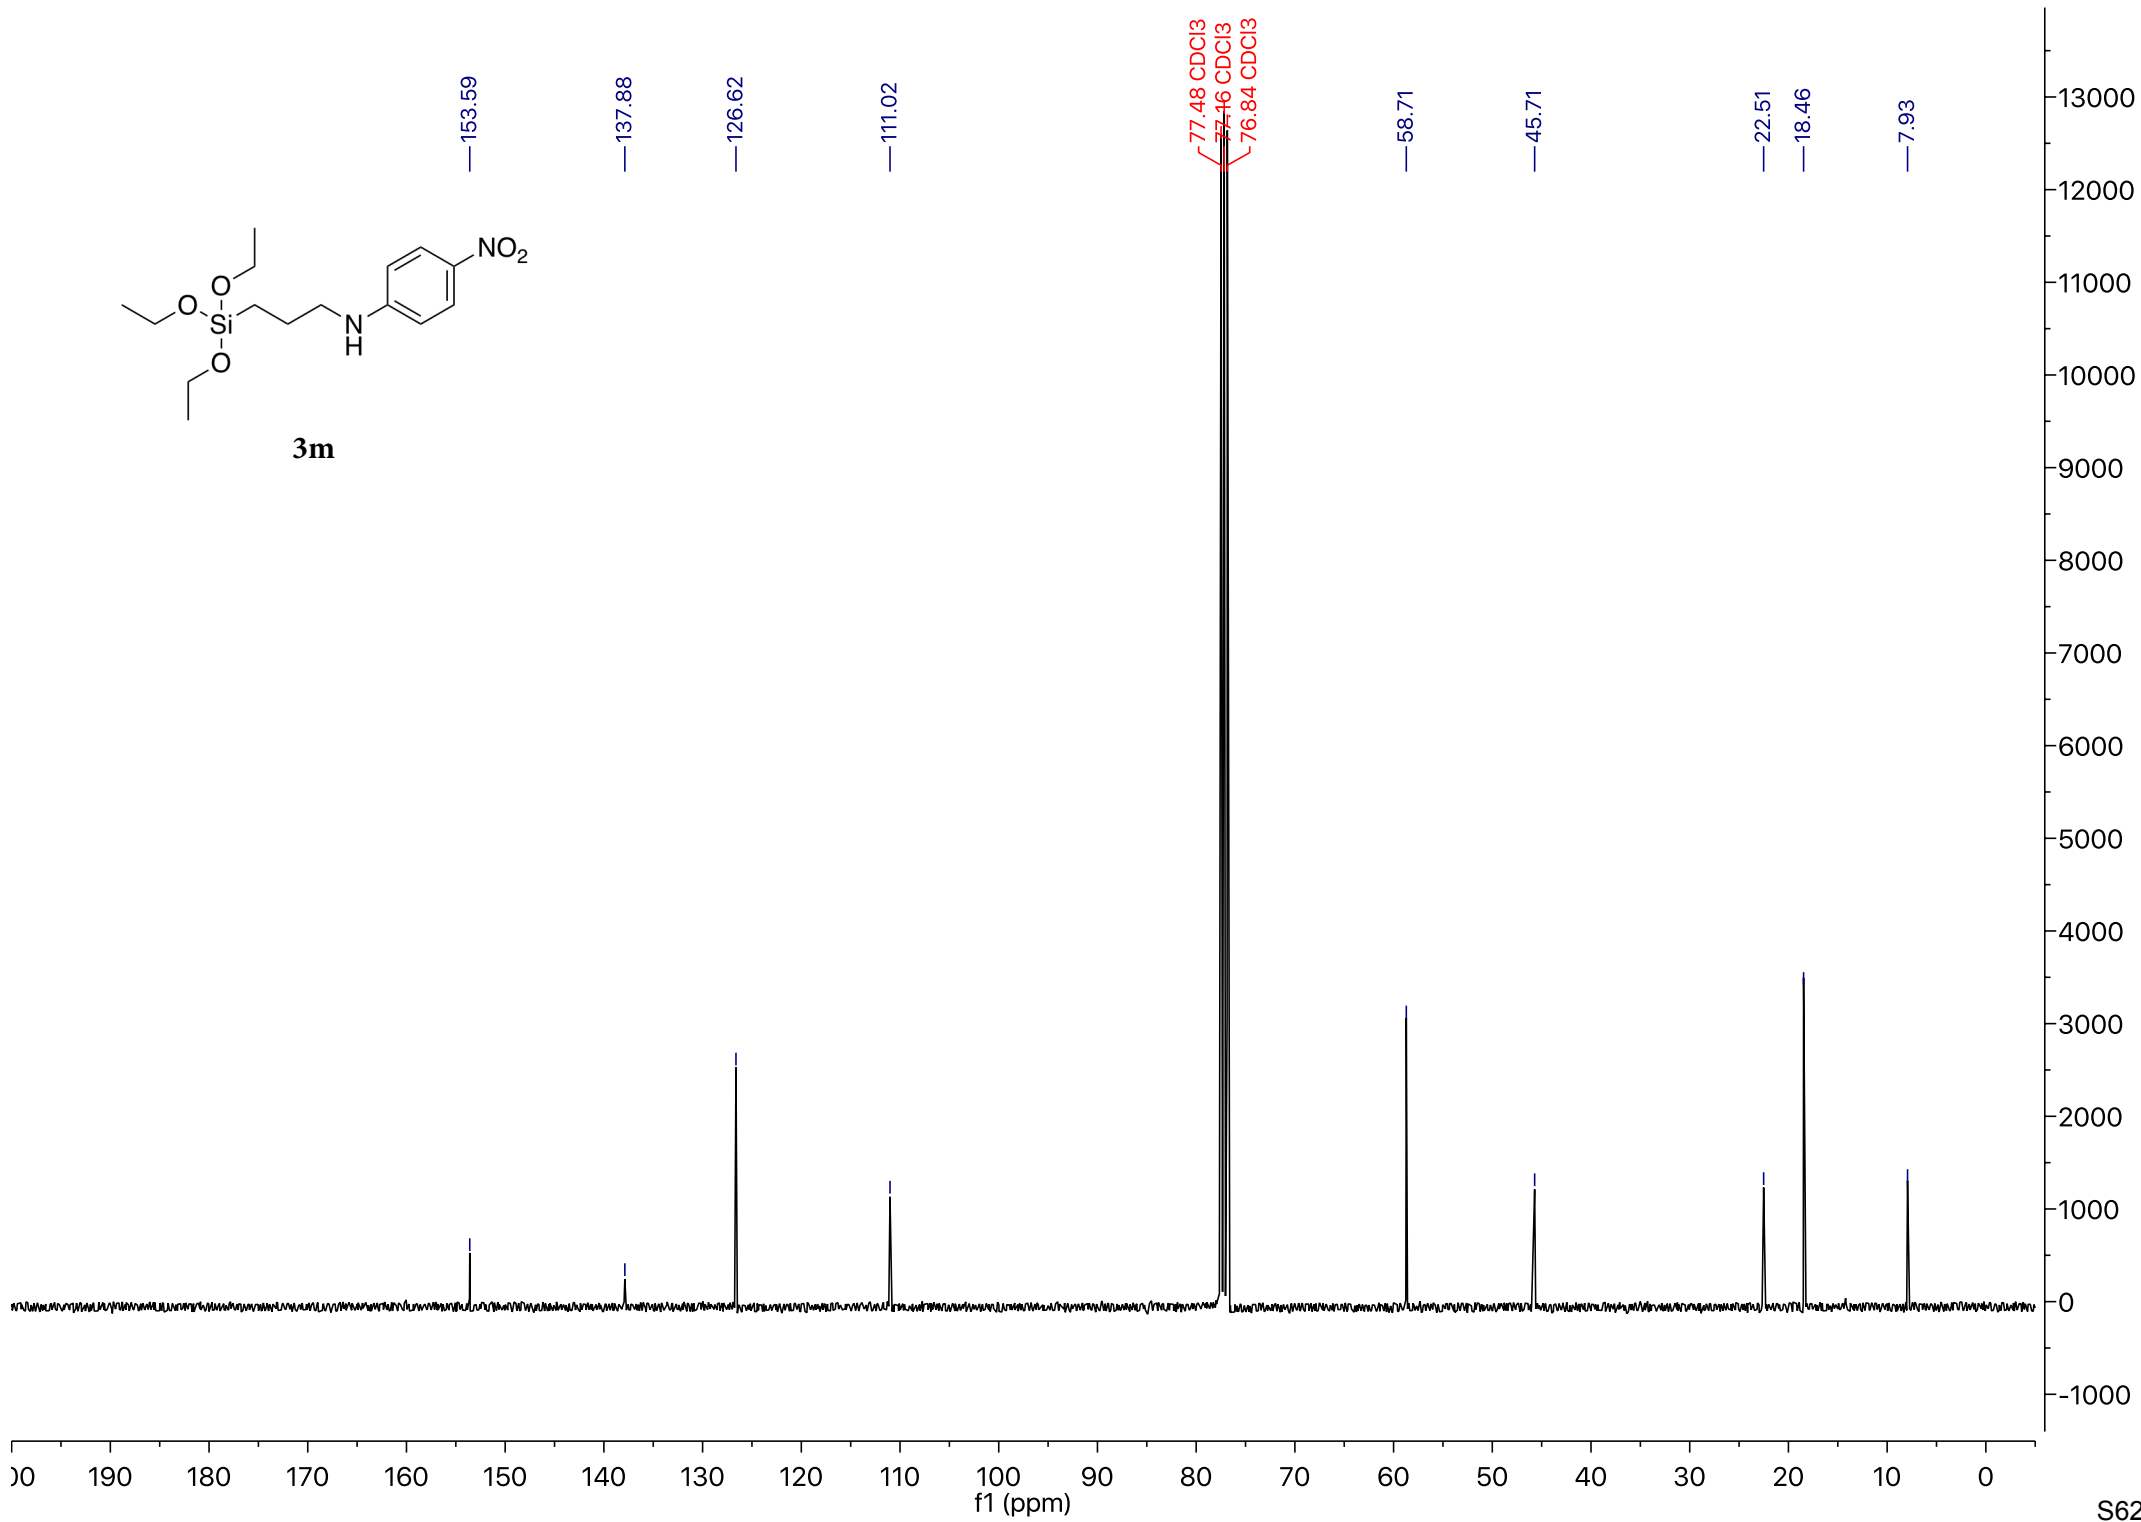

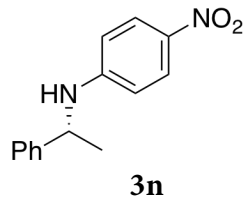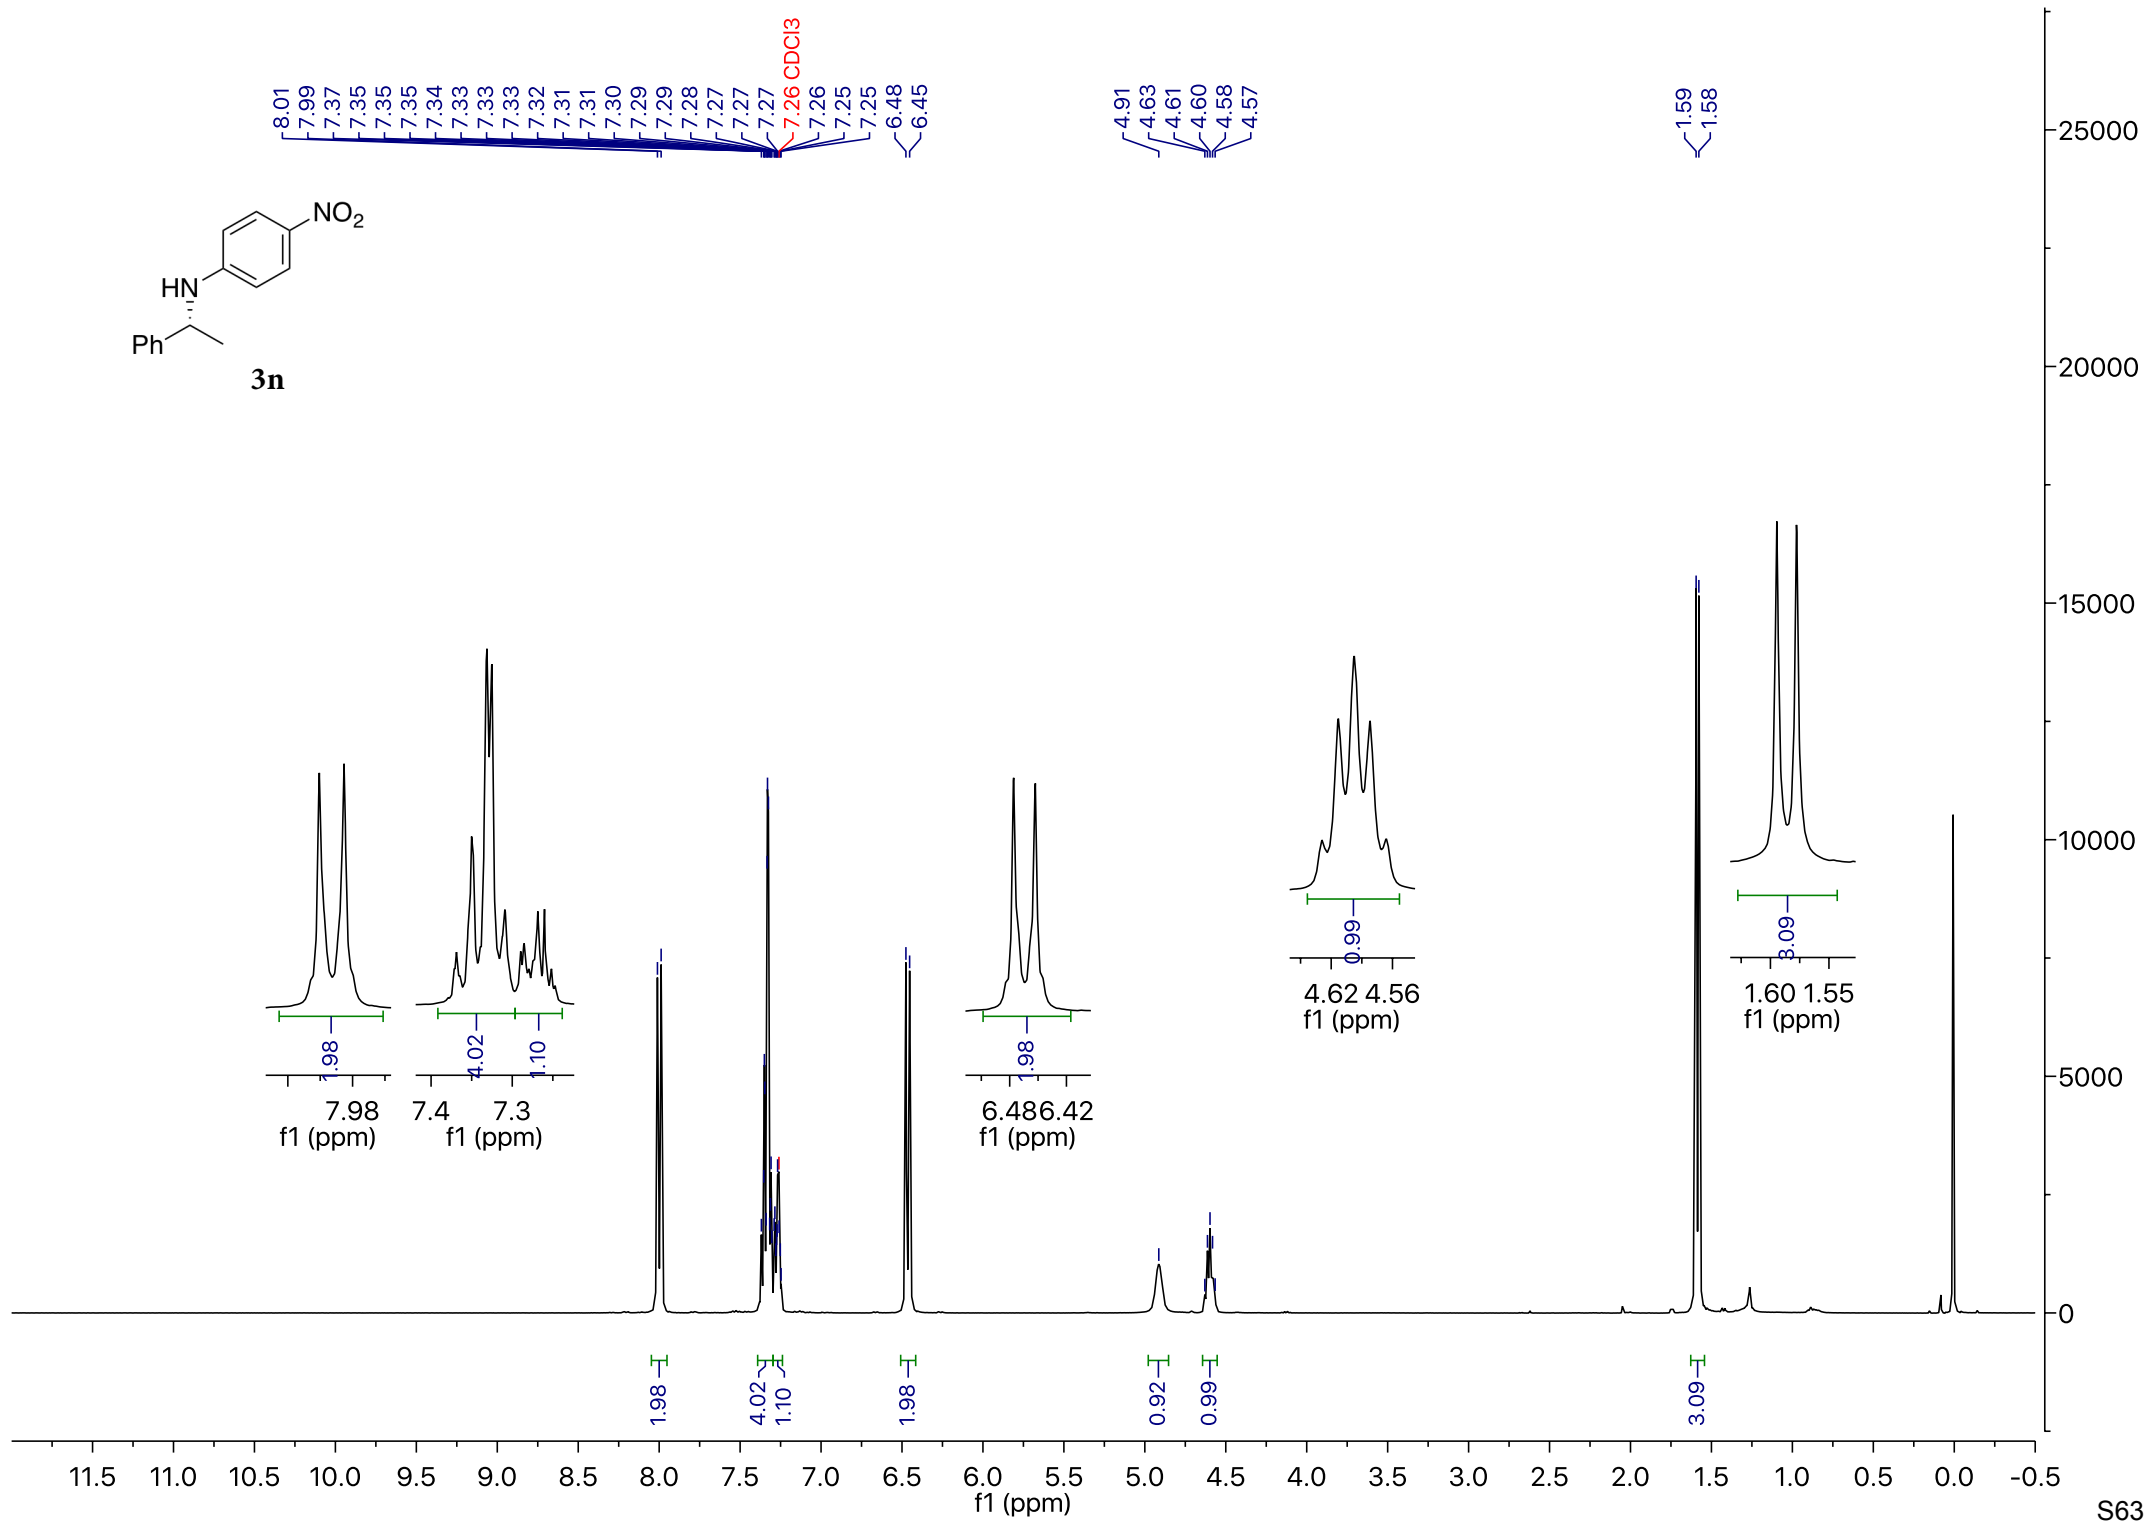

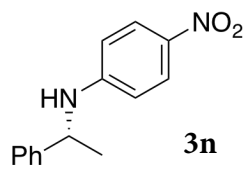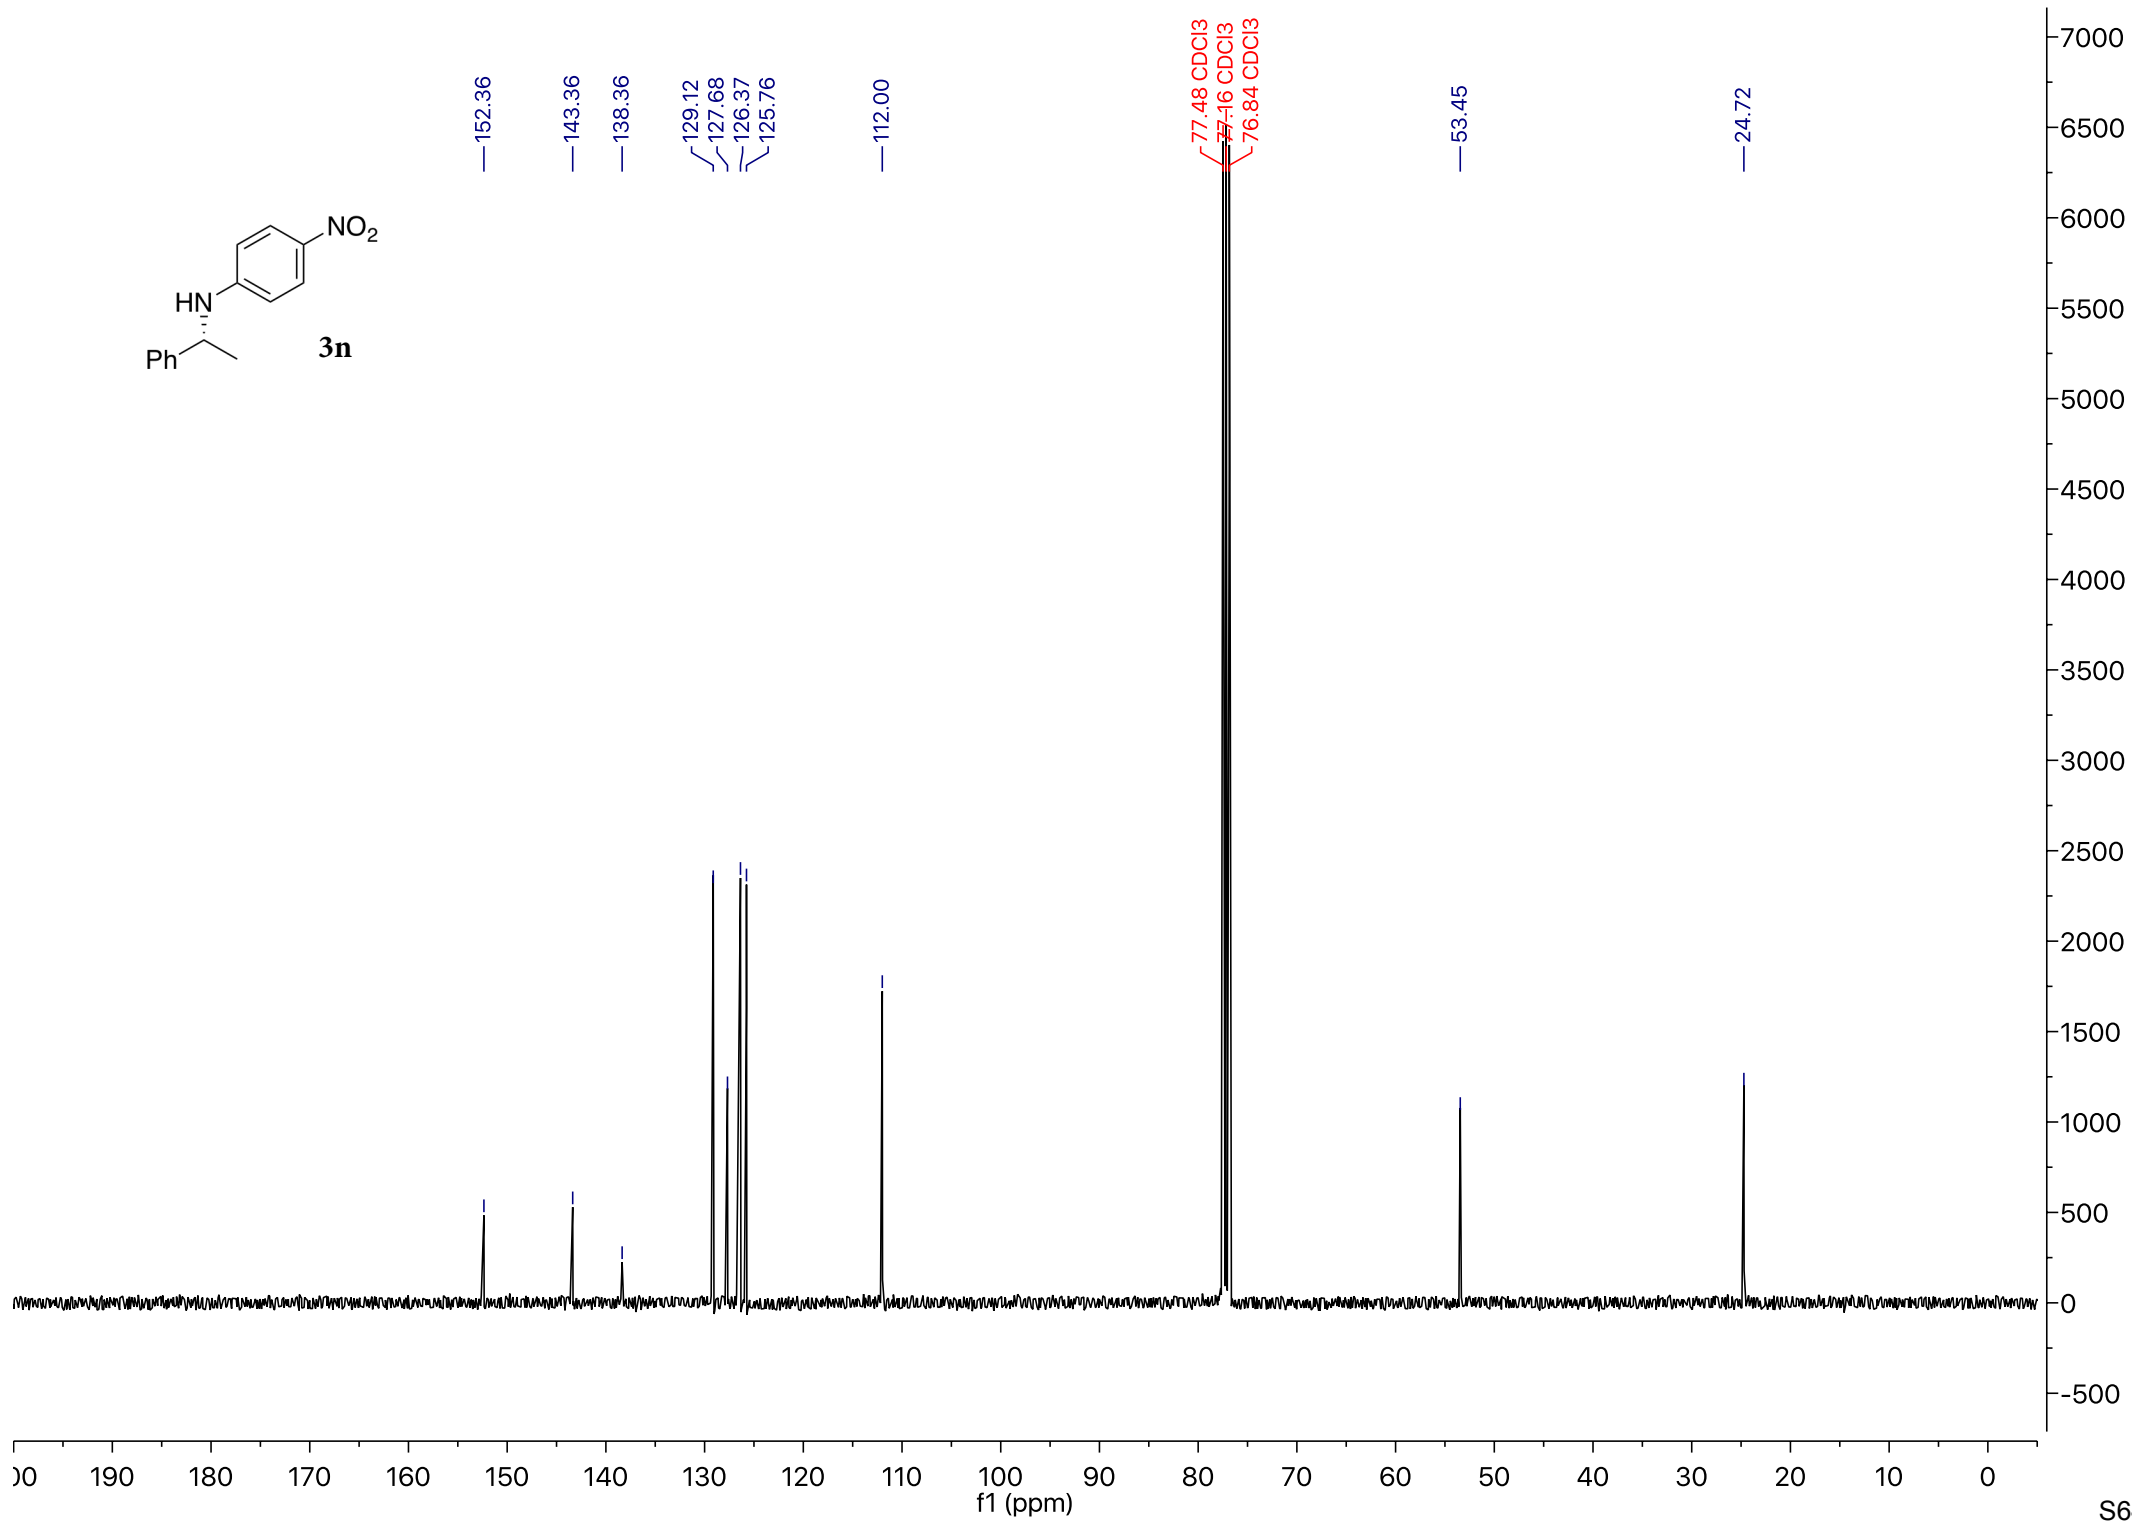

8.14  
8.13  
8.12  
8.11  
8.11  
8.10  
7.41  
7.41  
7.39  
7.39  
7.38  
7.37  
7.26 CDCl3  
7.23  
7.23  
7.22  
7.21  
7.21  
7.21  
7.20  
7.19  
7.19  
7.17  
7.17  
7.17  
7.15  
6.96  
6.96  
6.95  
6.94  
6.93  
6.92  
6.33

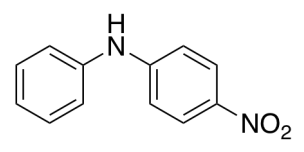

30

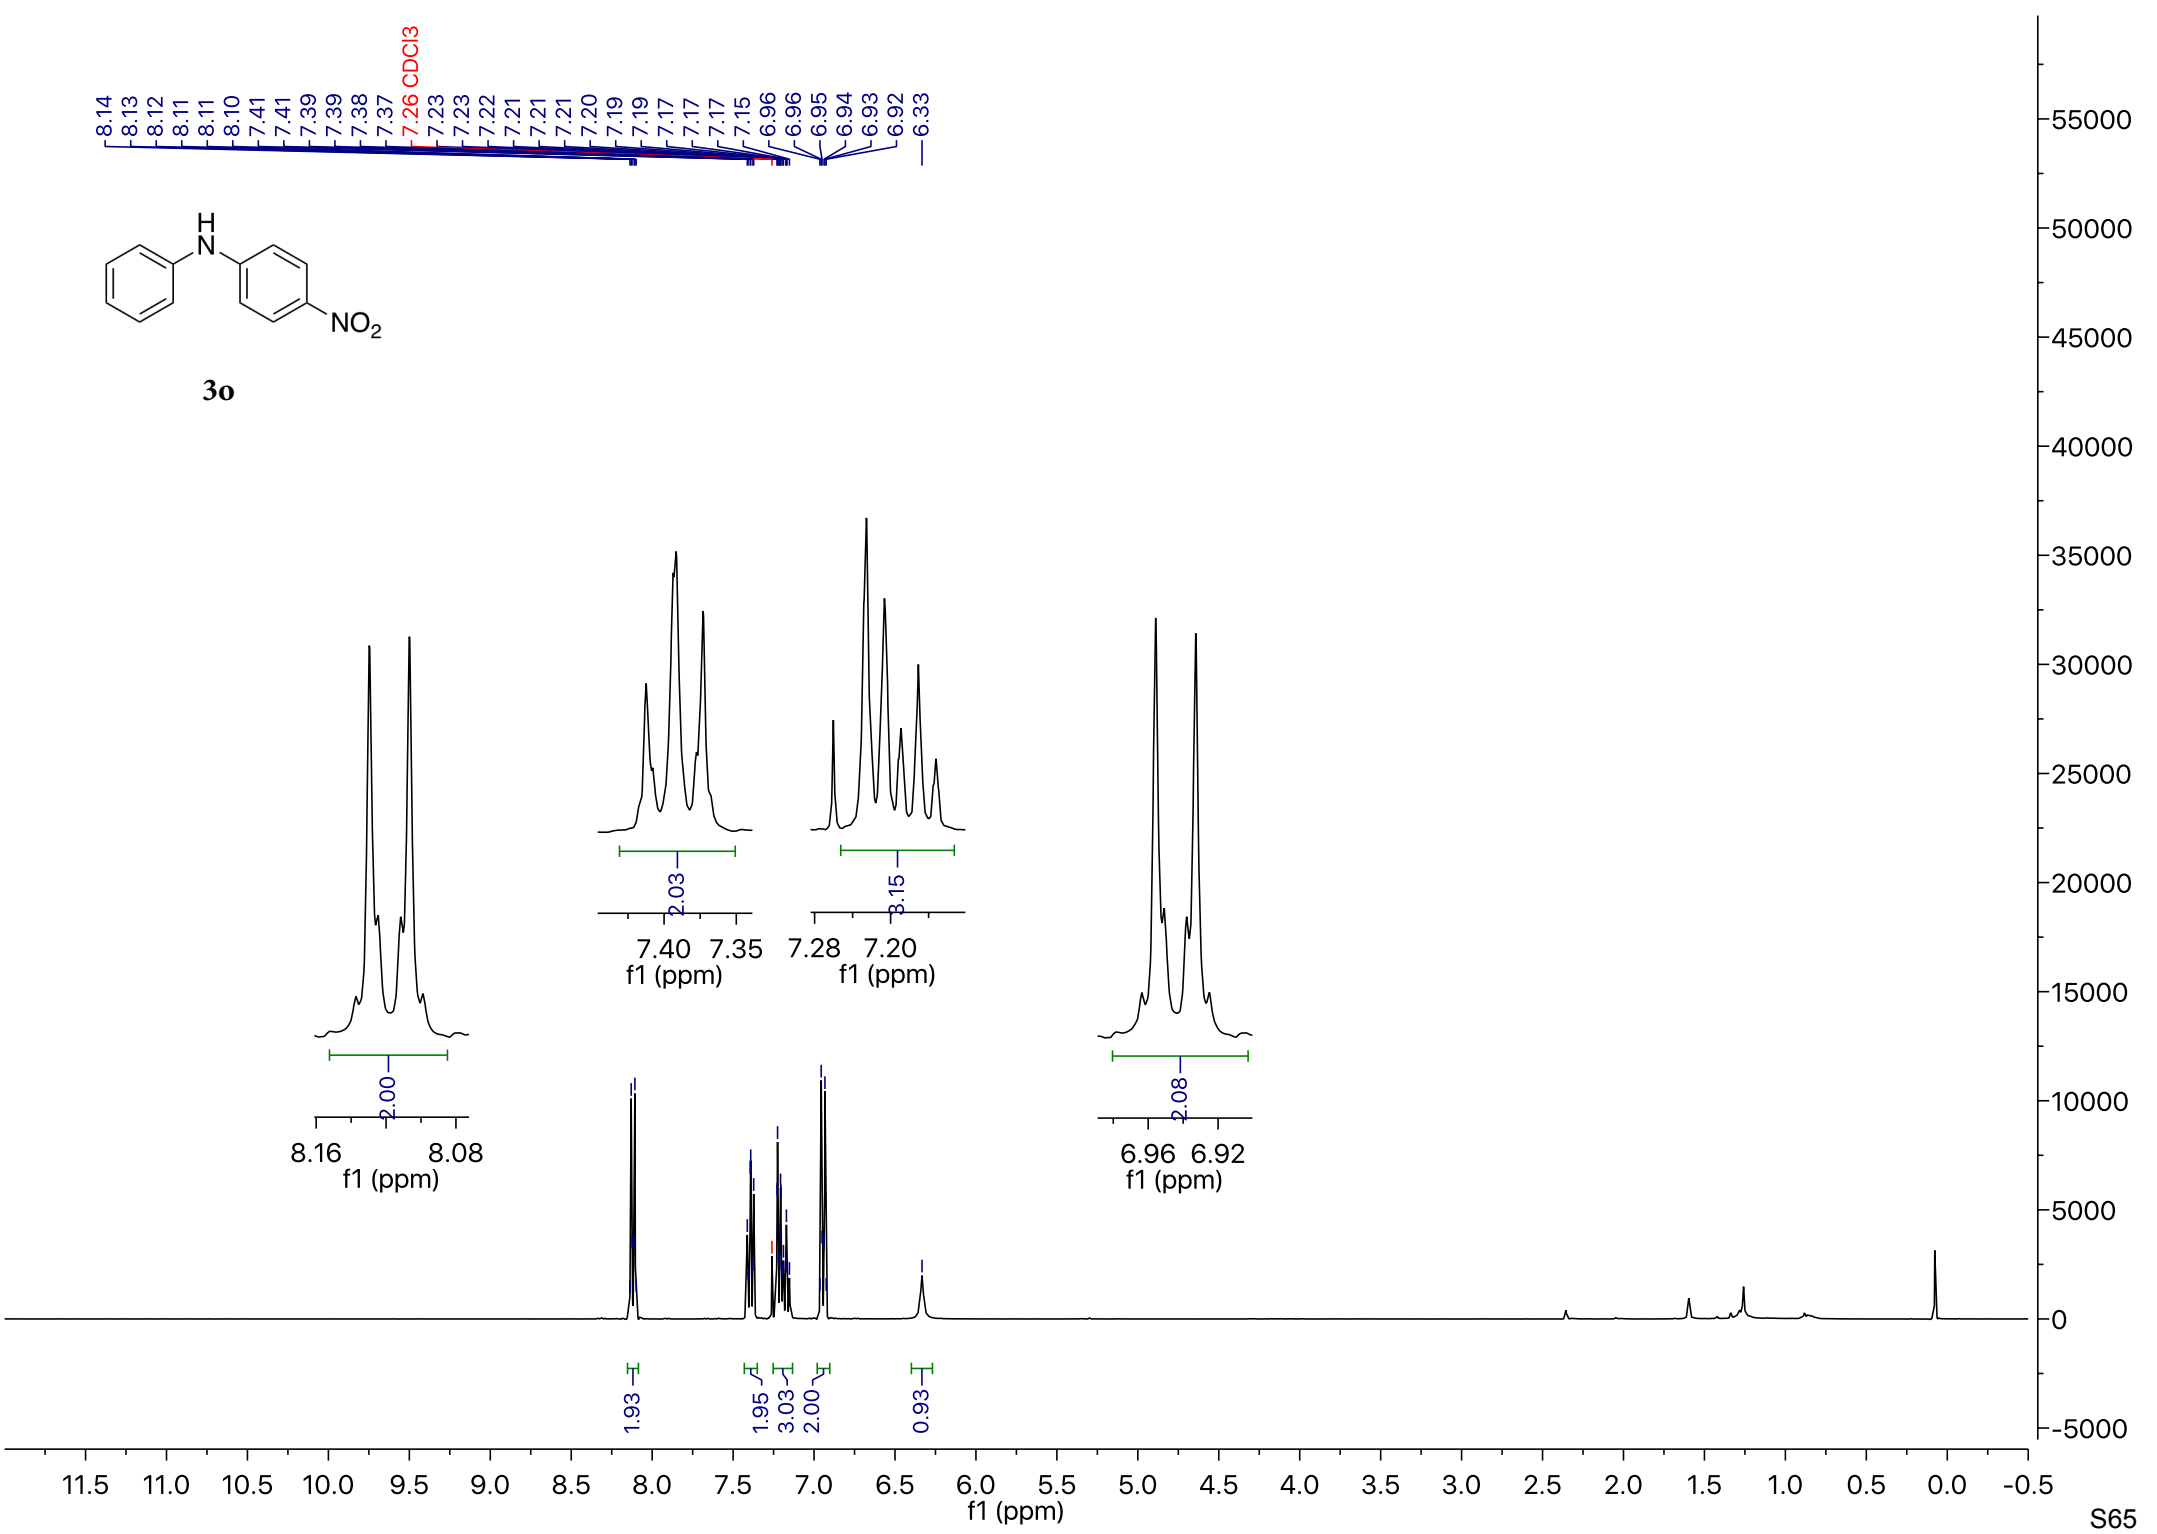

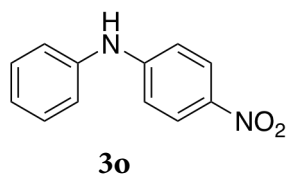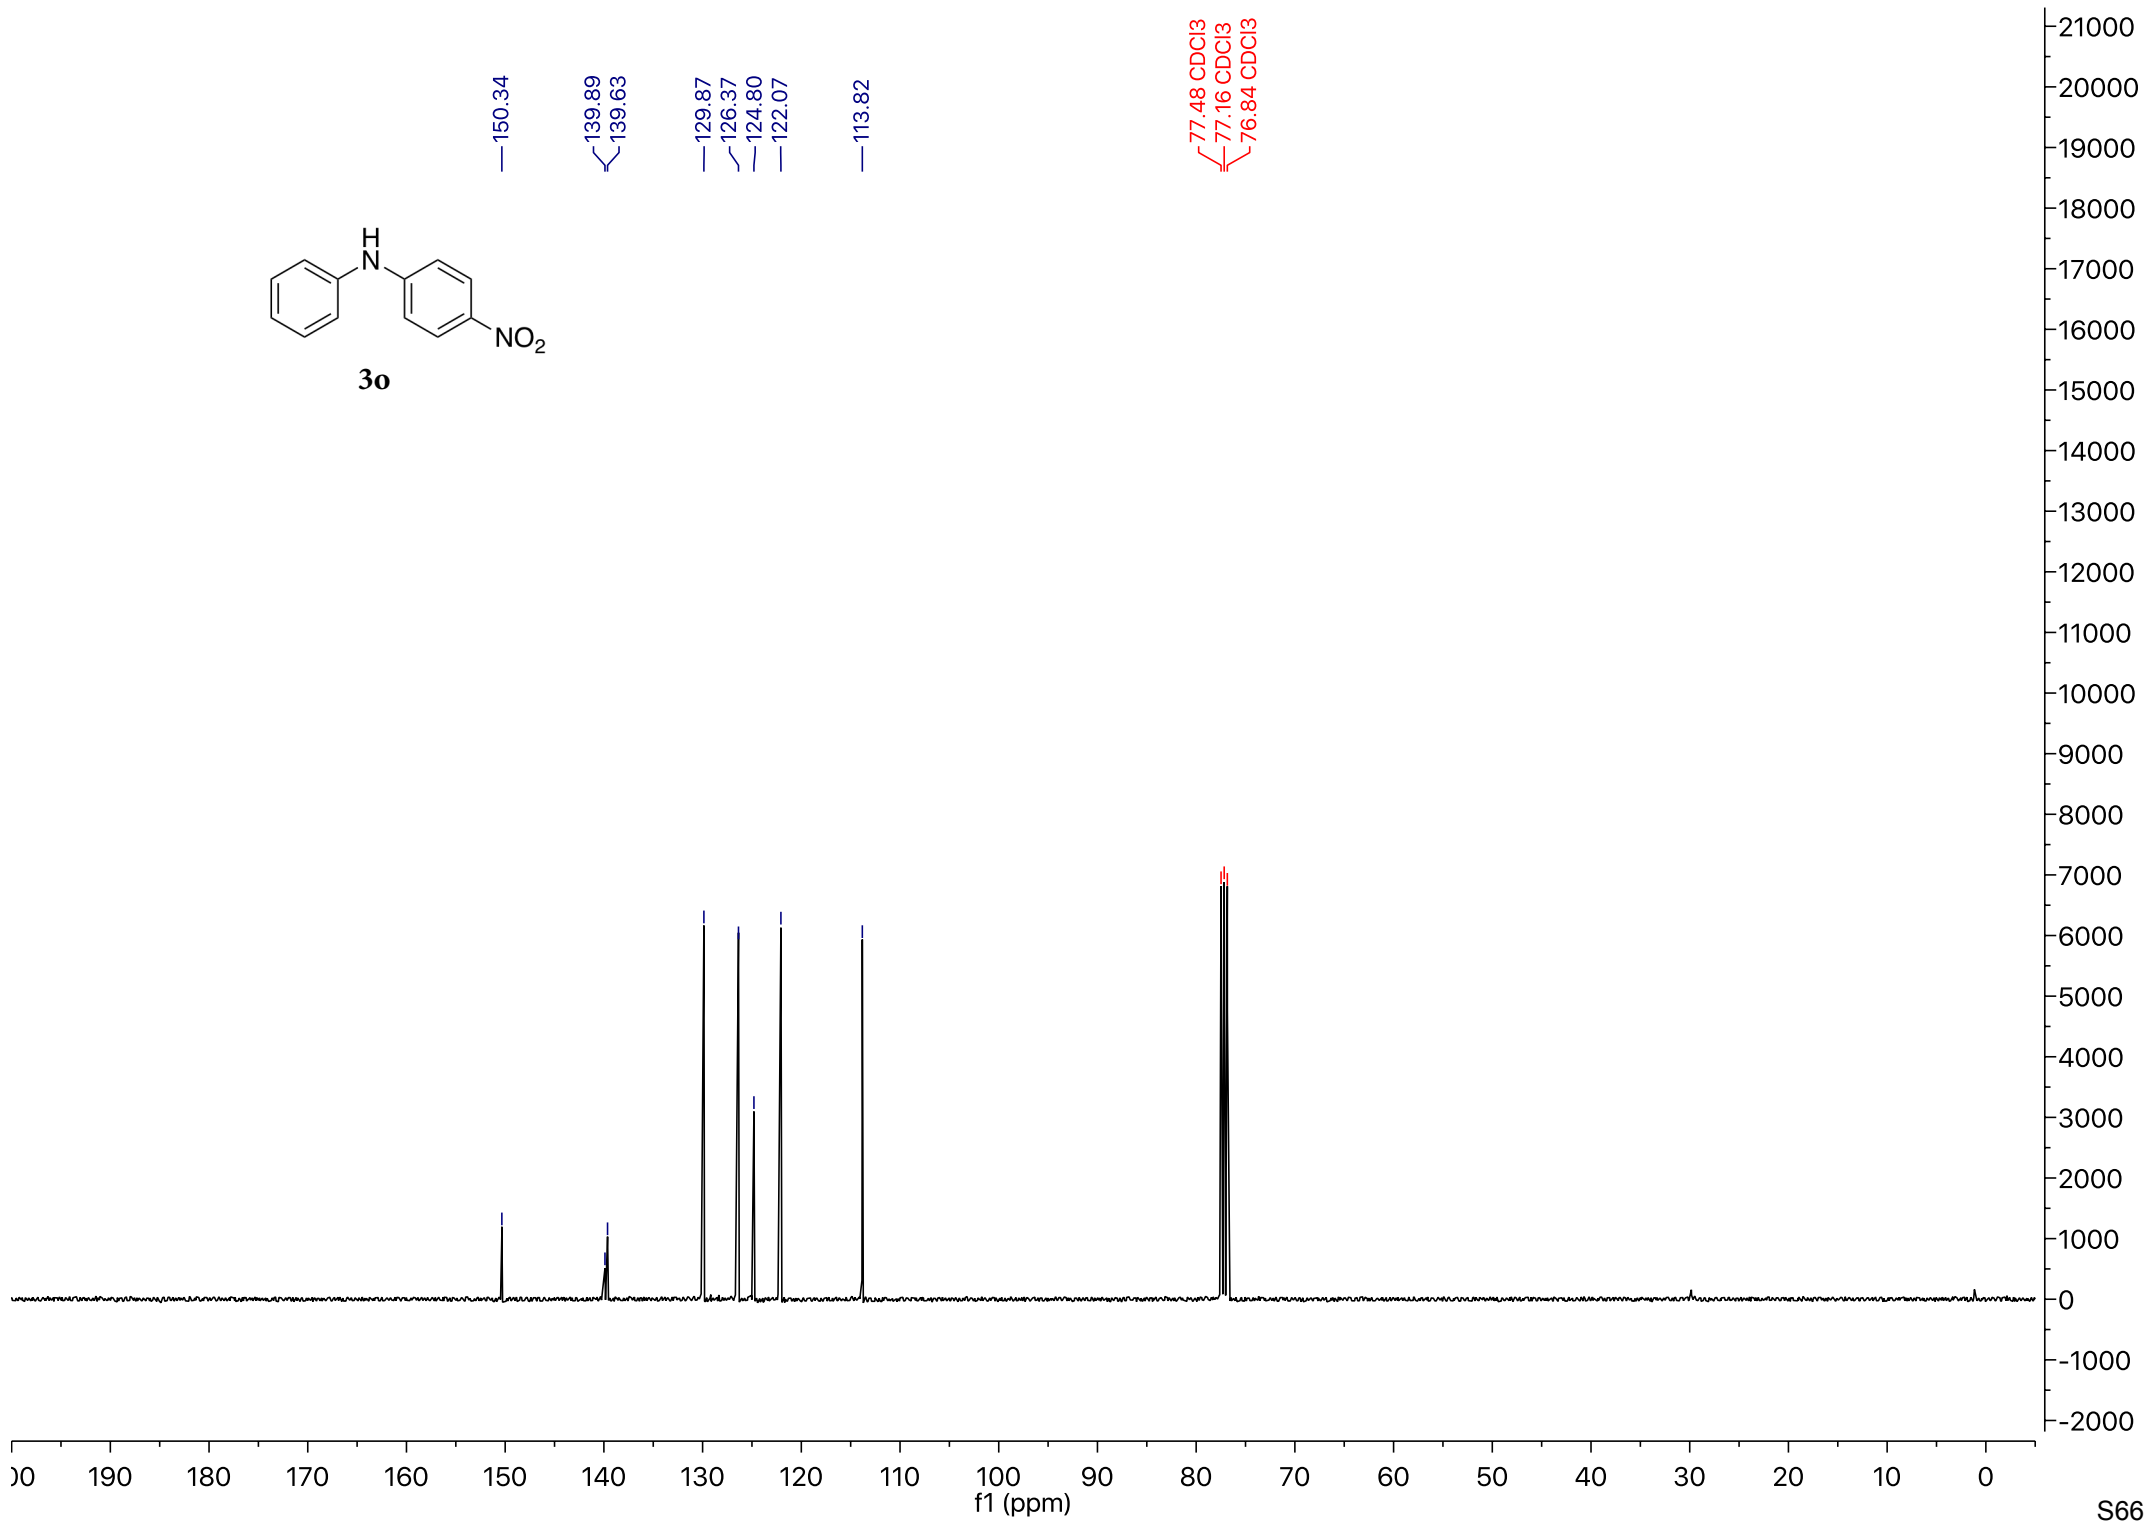





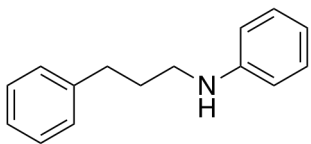

3p

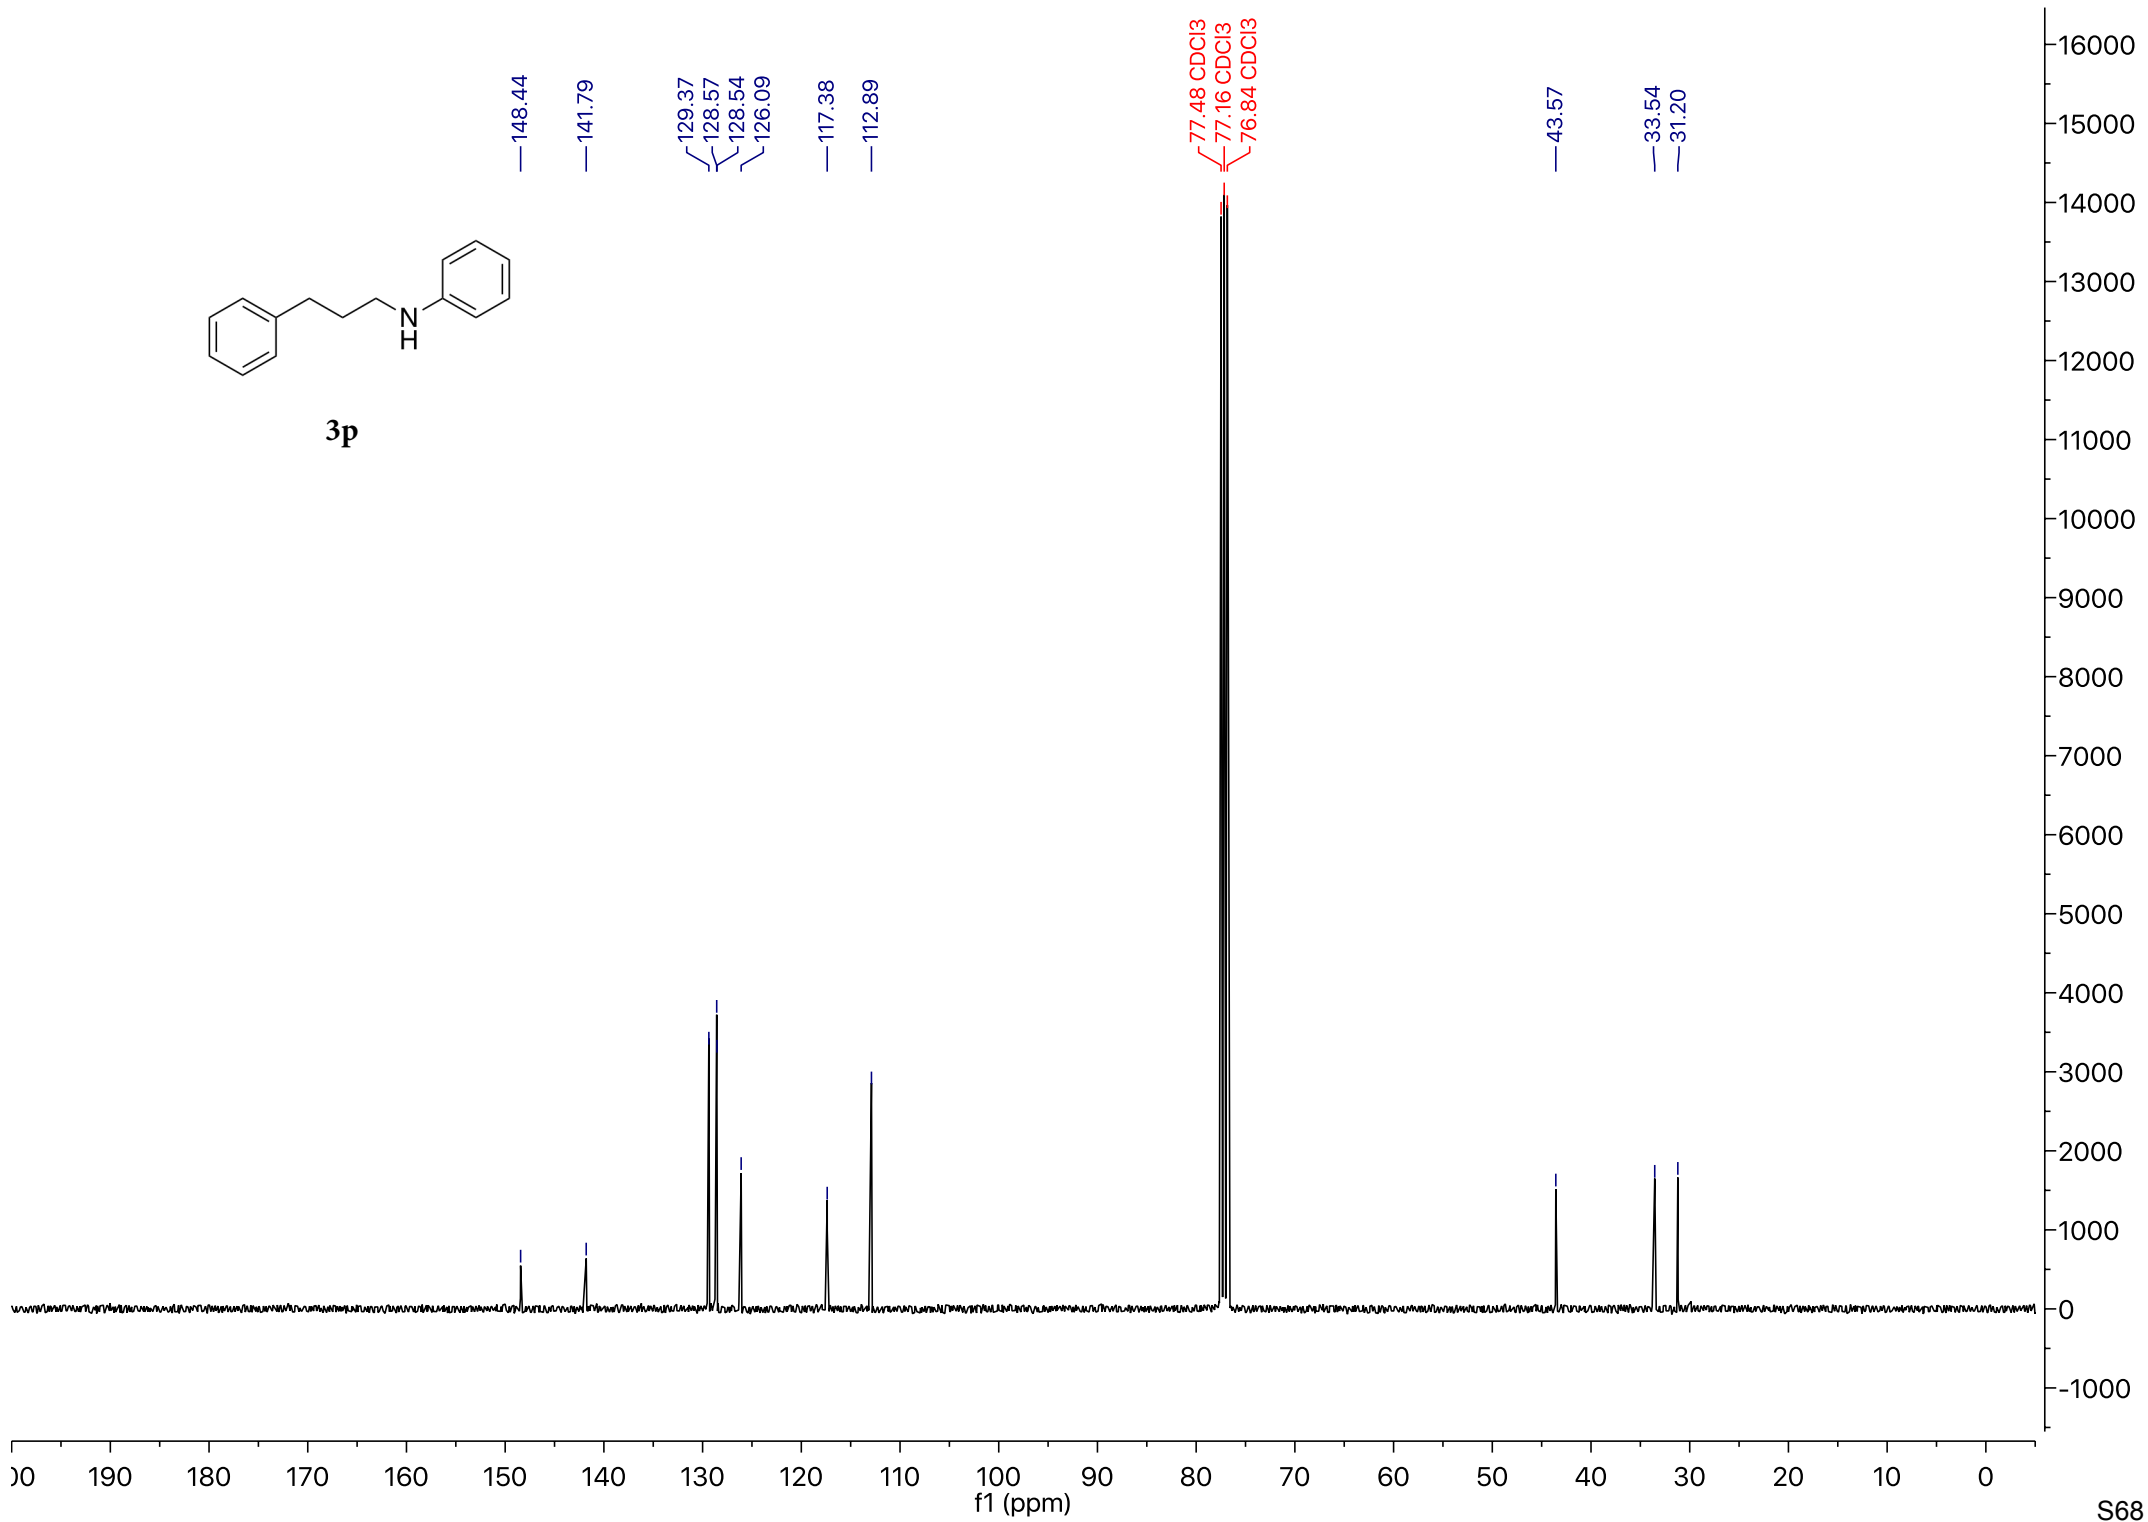

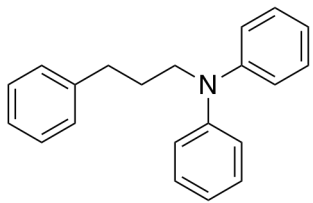

3p'

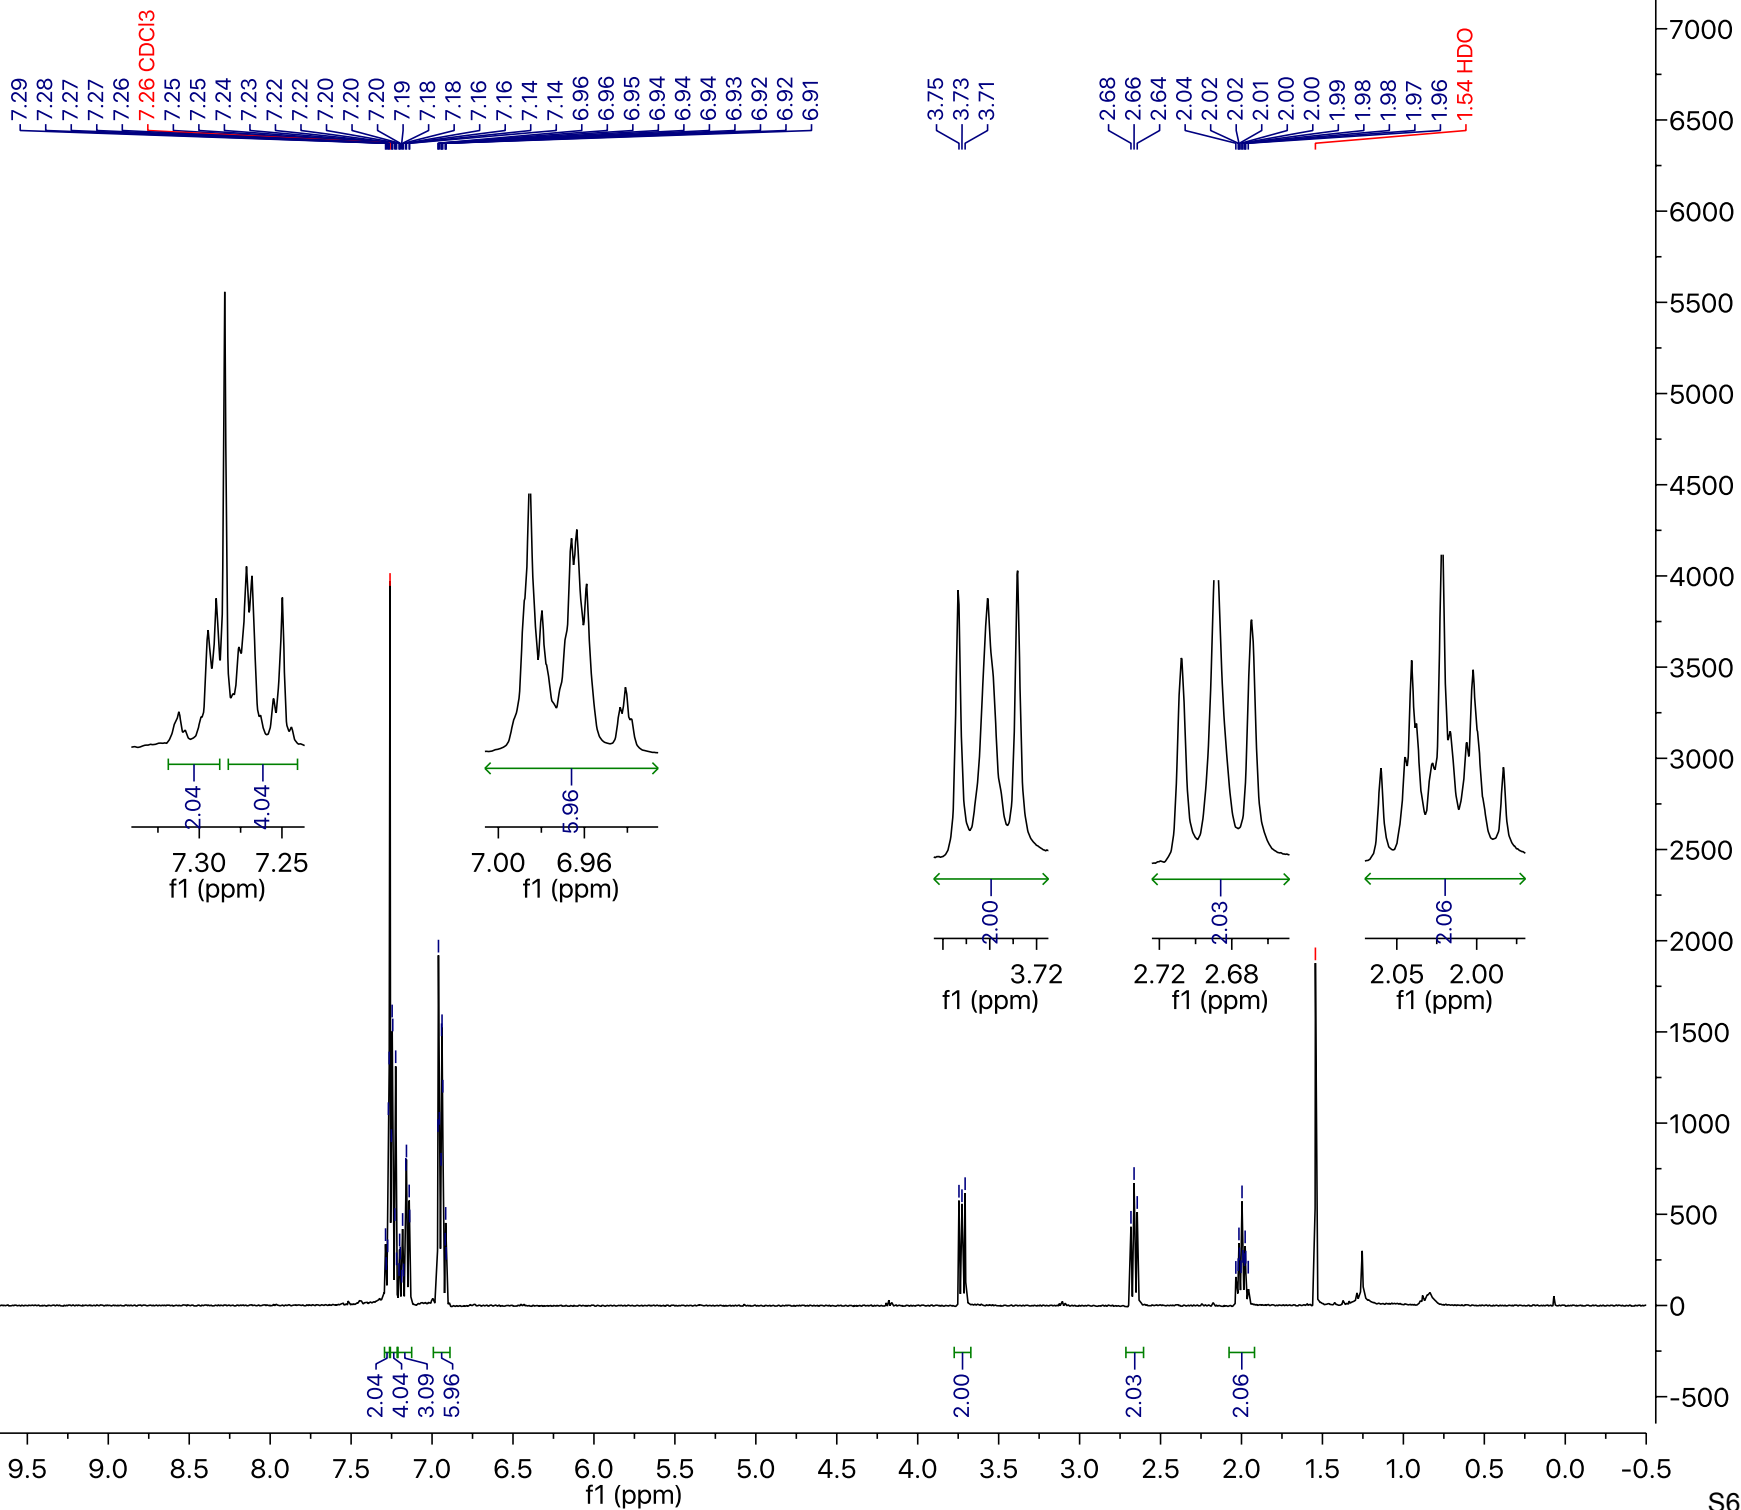

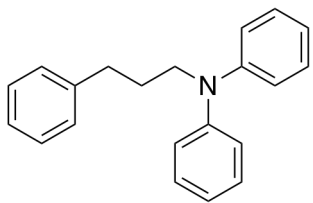

3p'

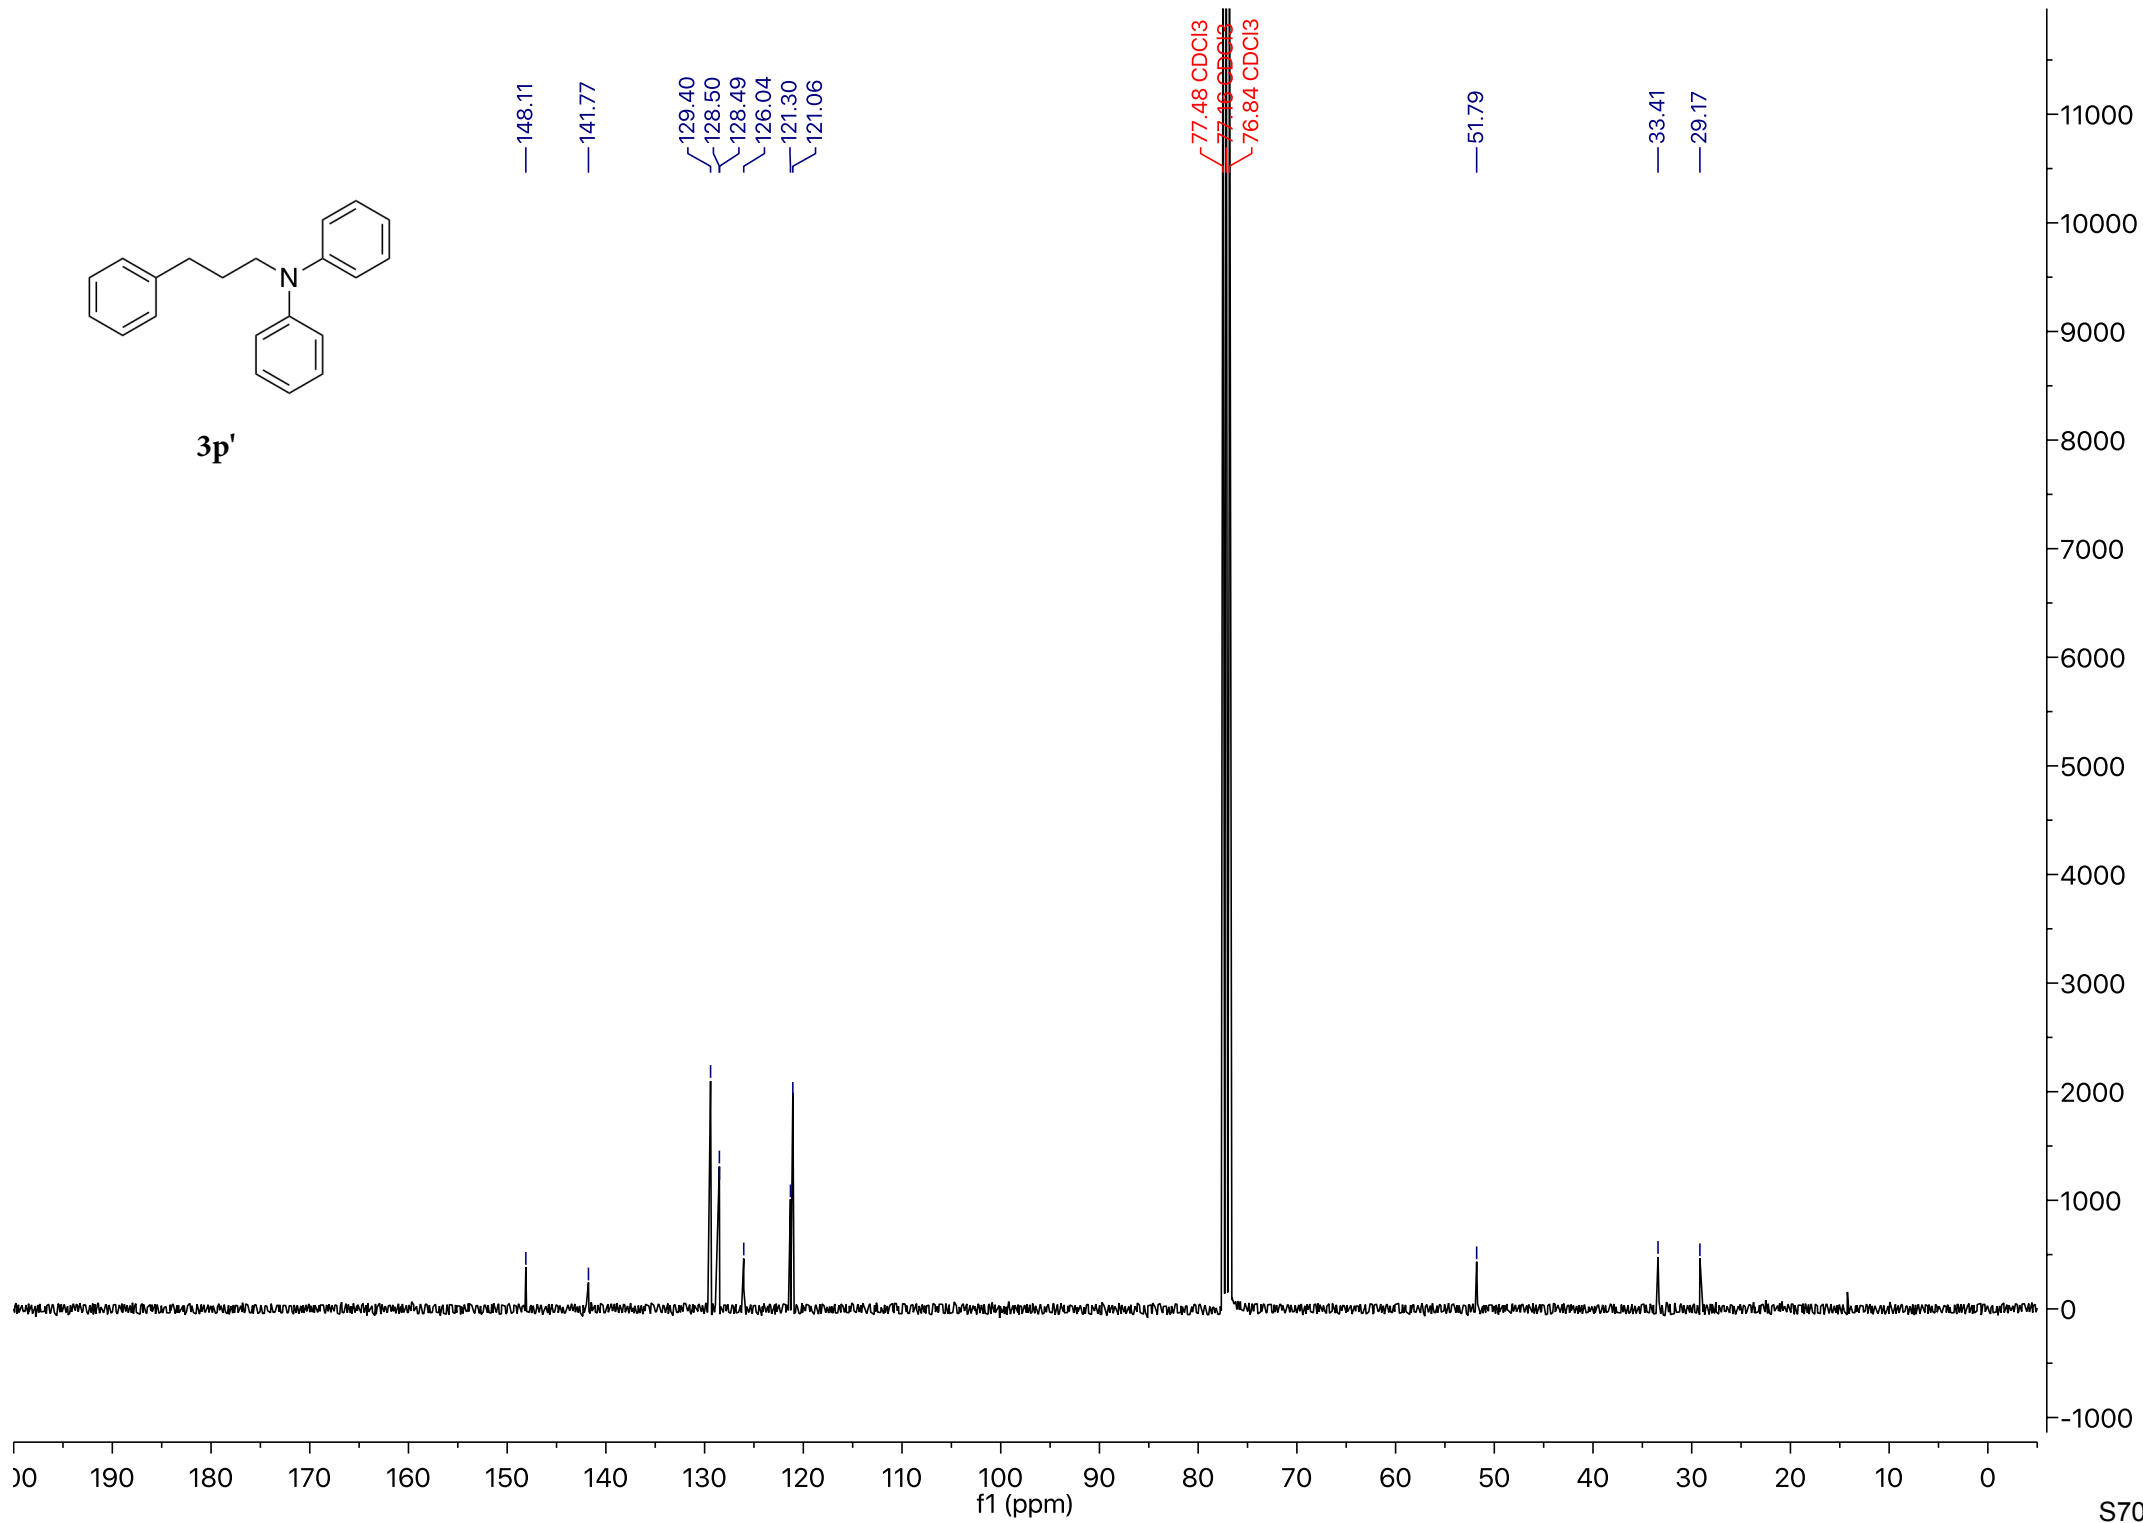

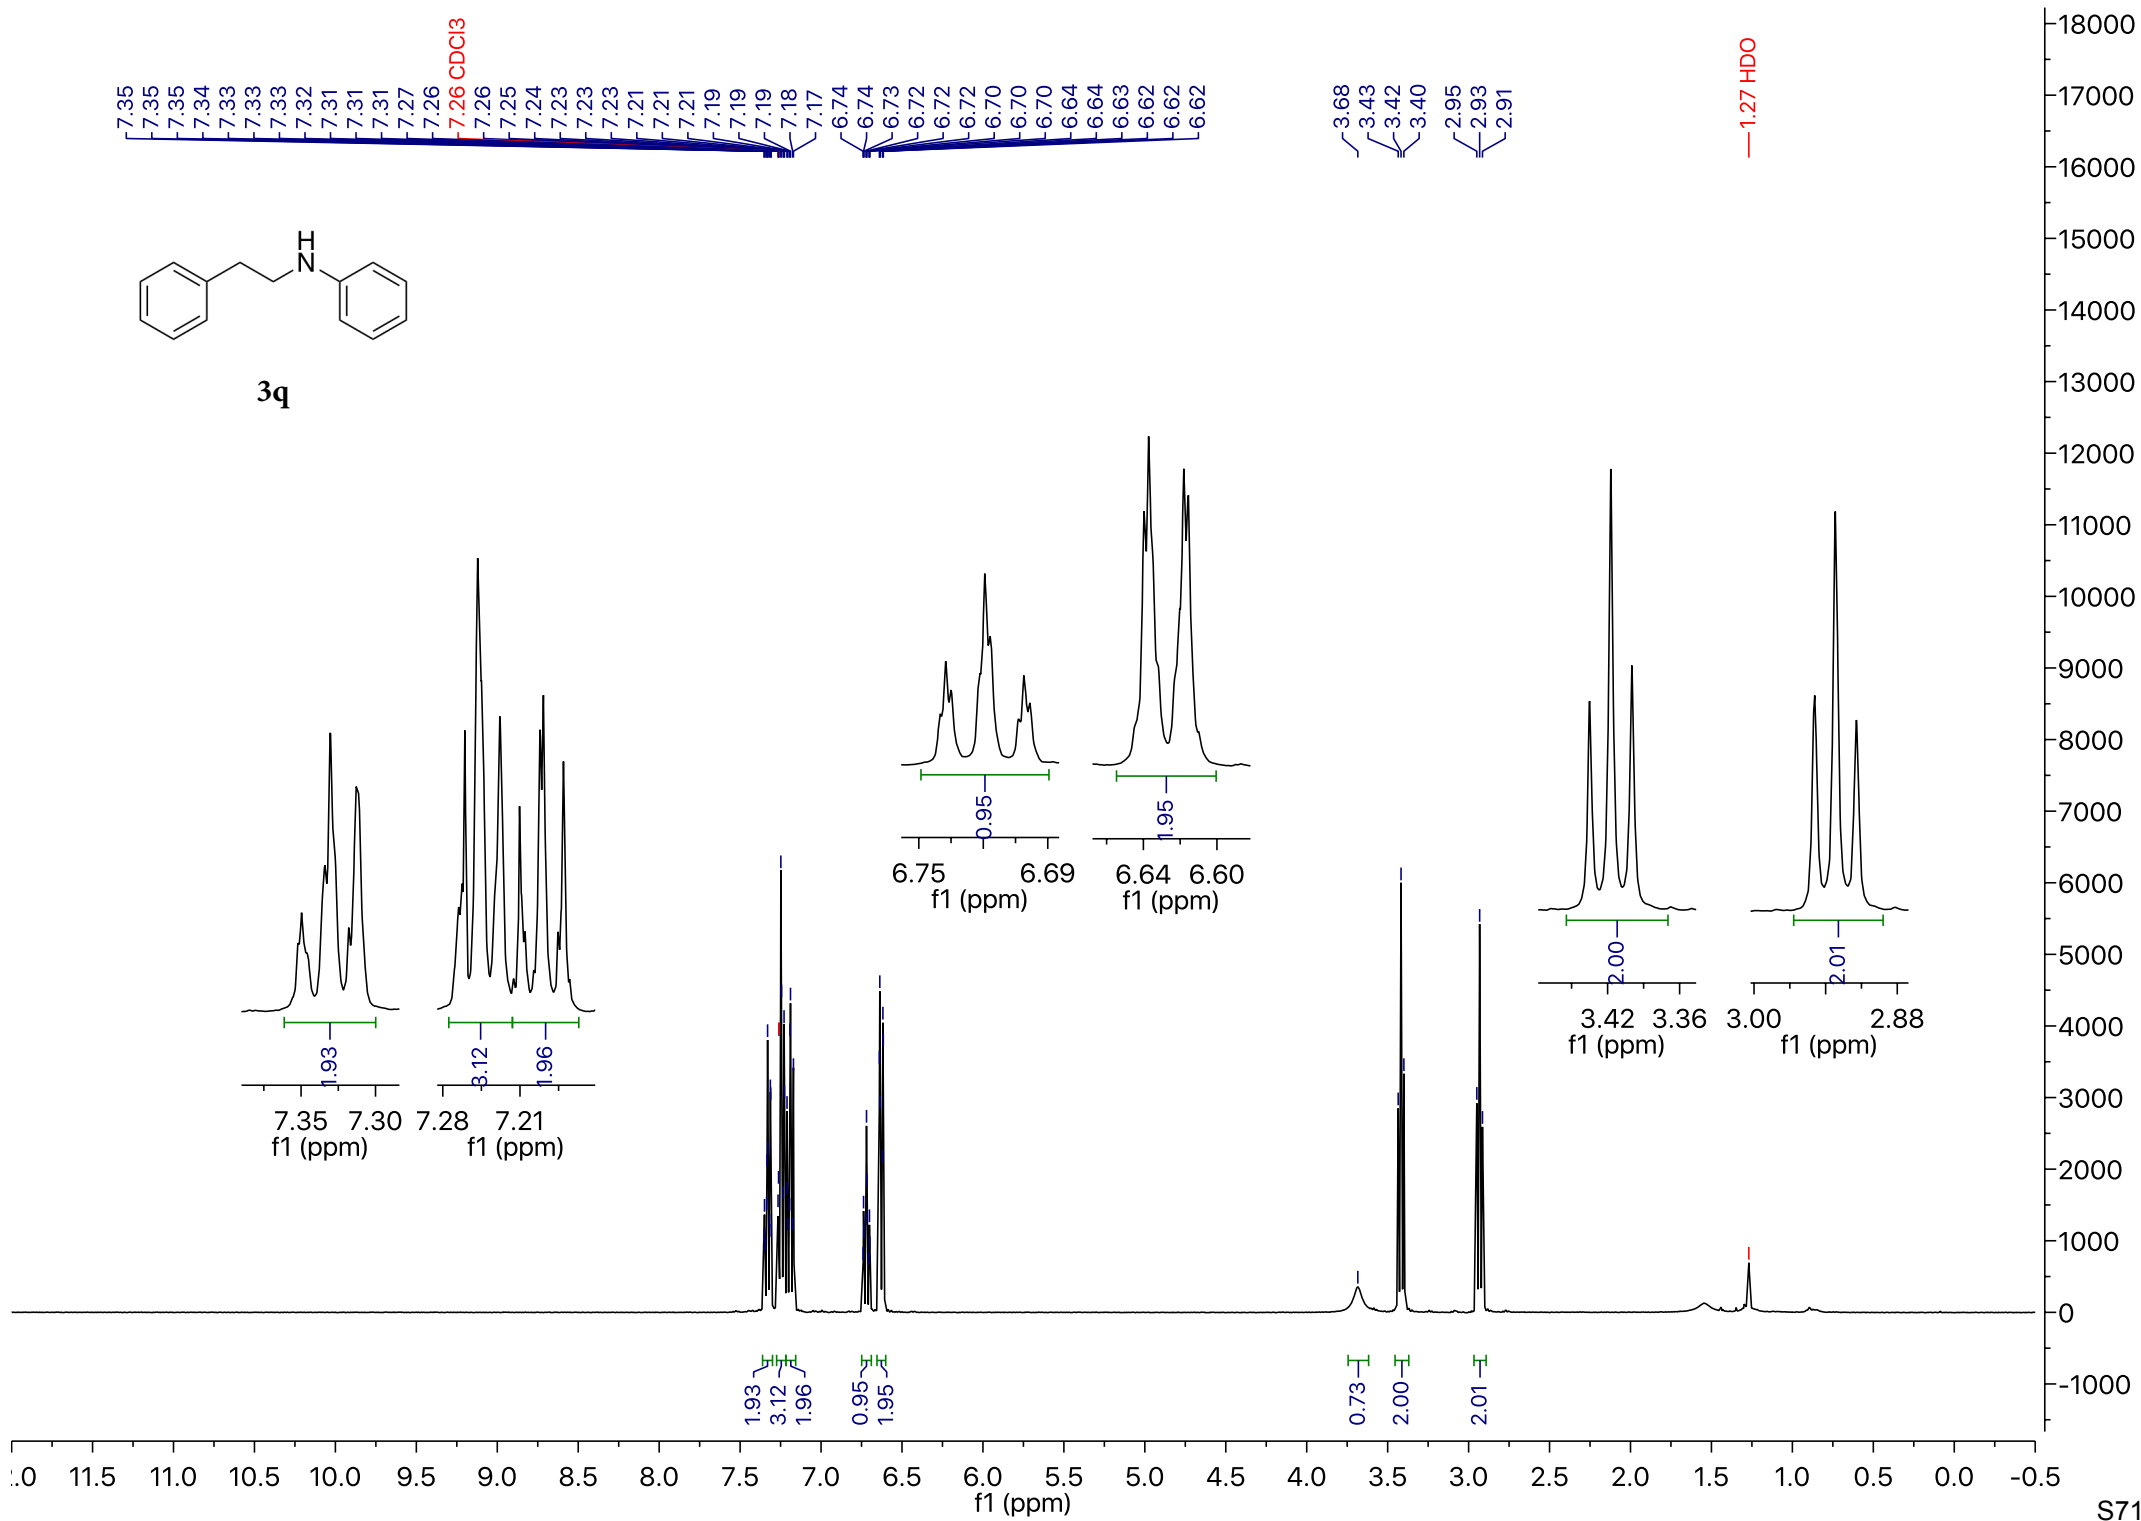

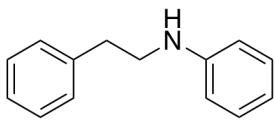

**3q**

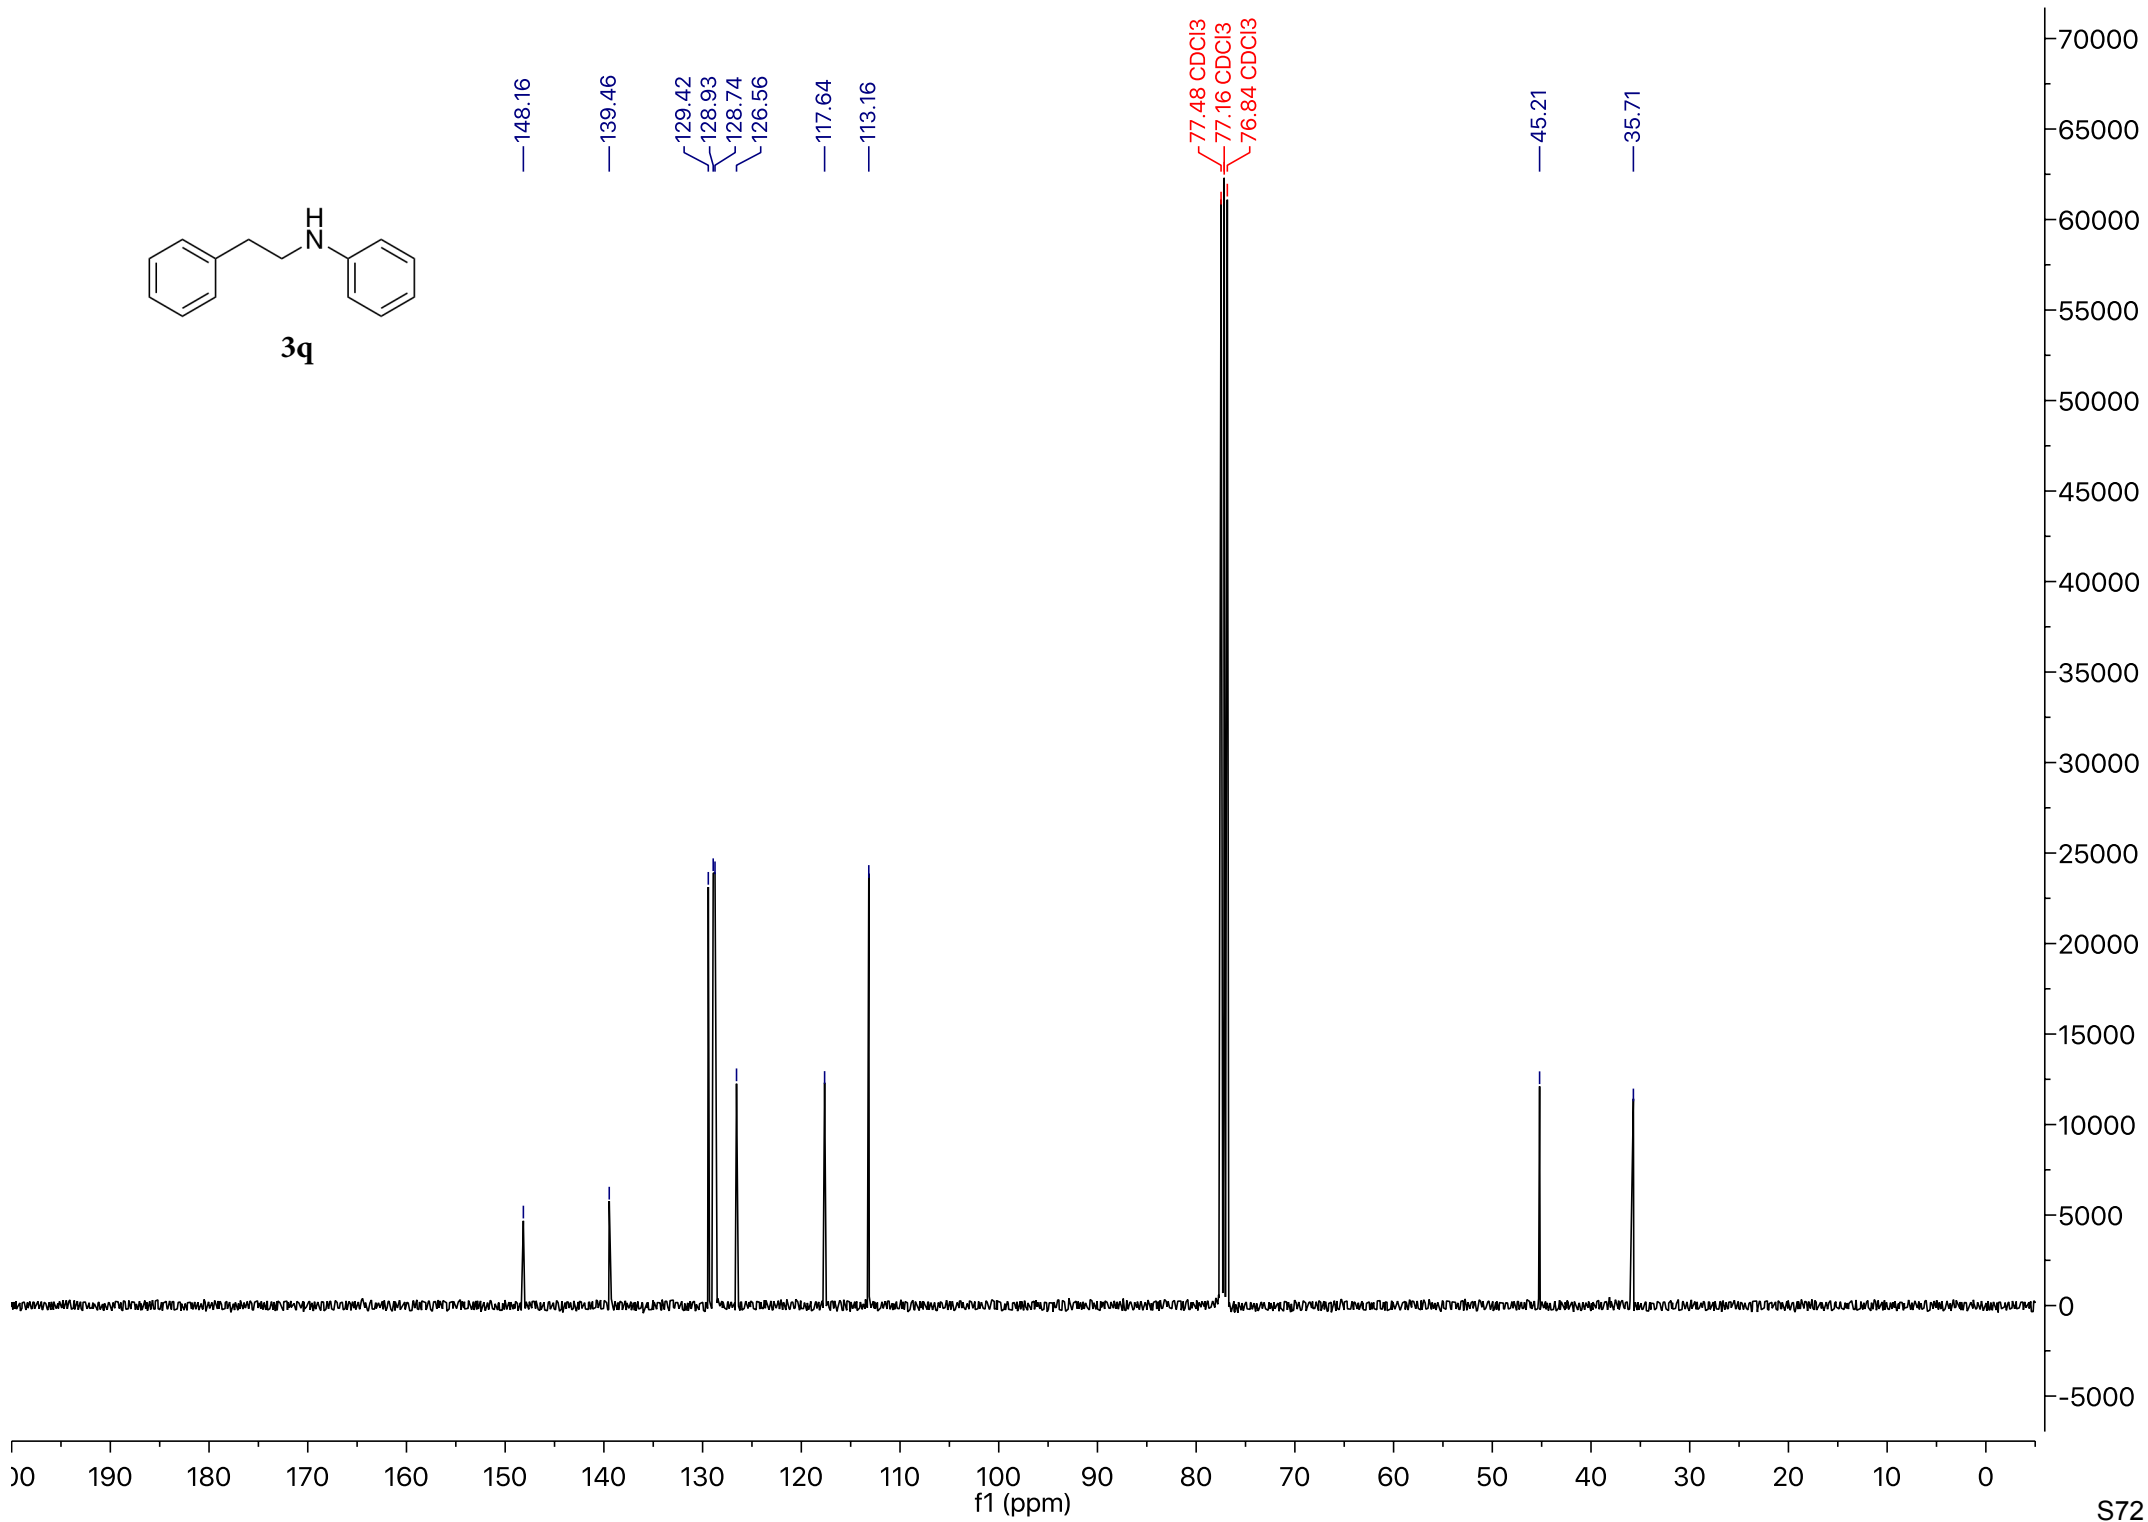

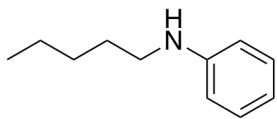

3r

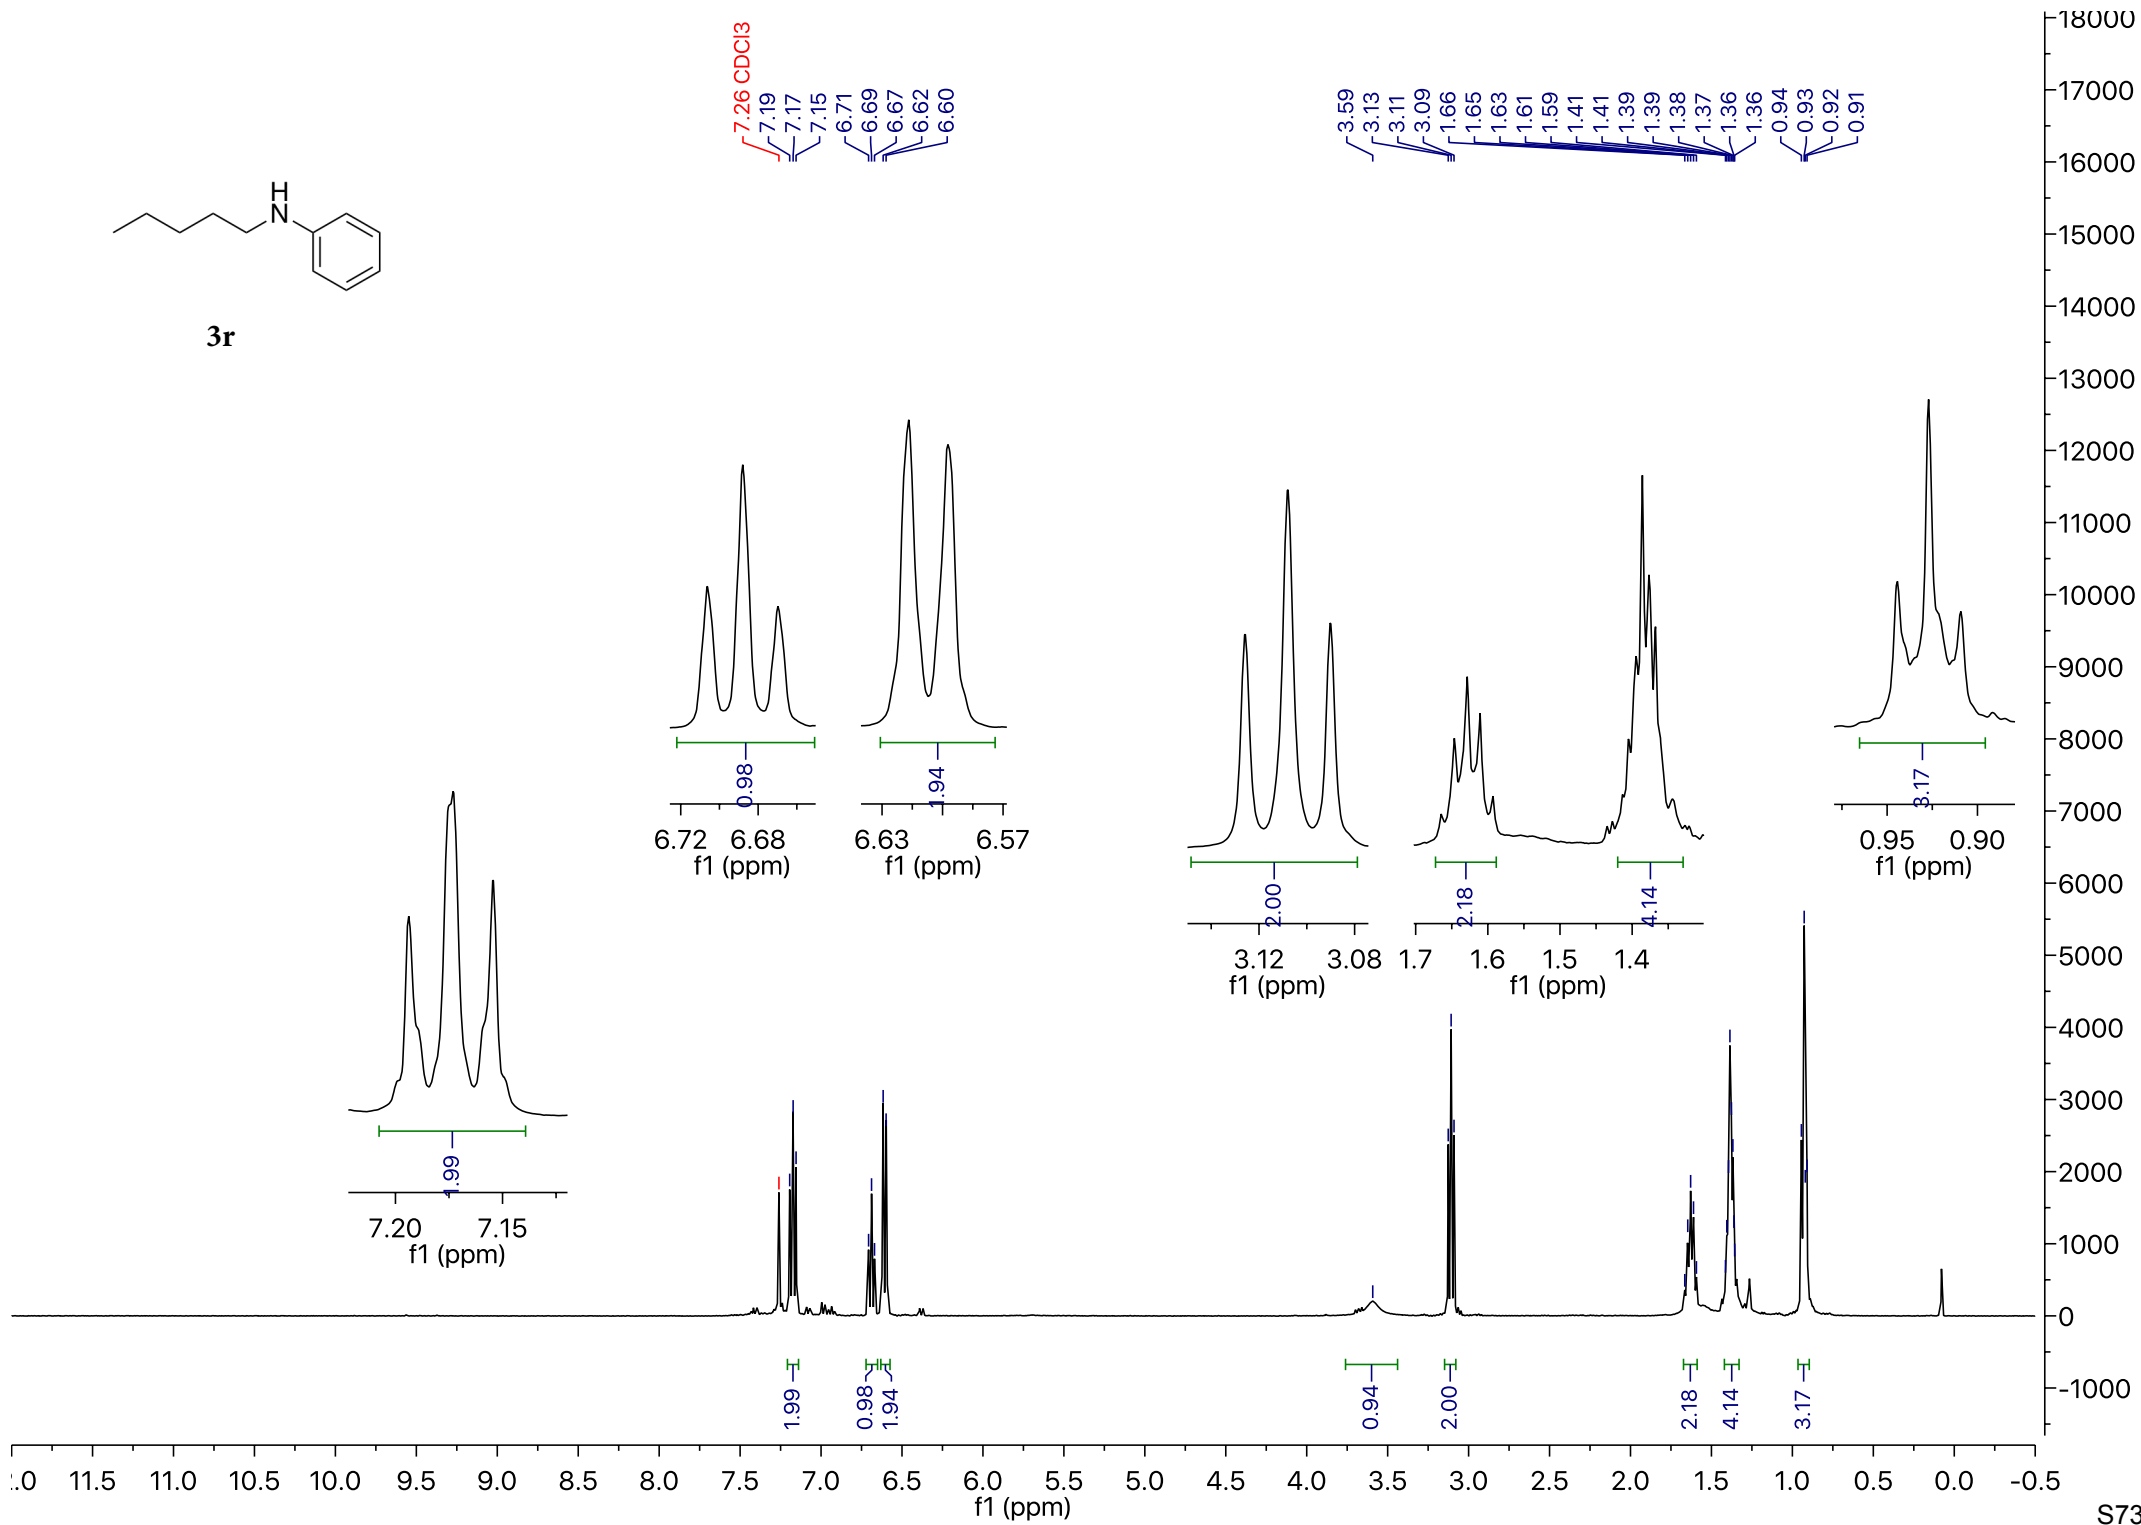

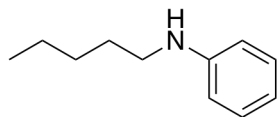

3r

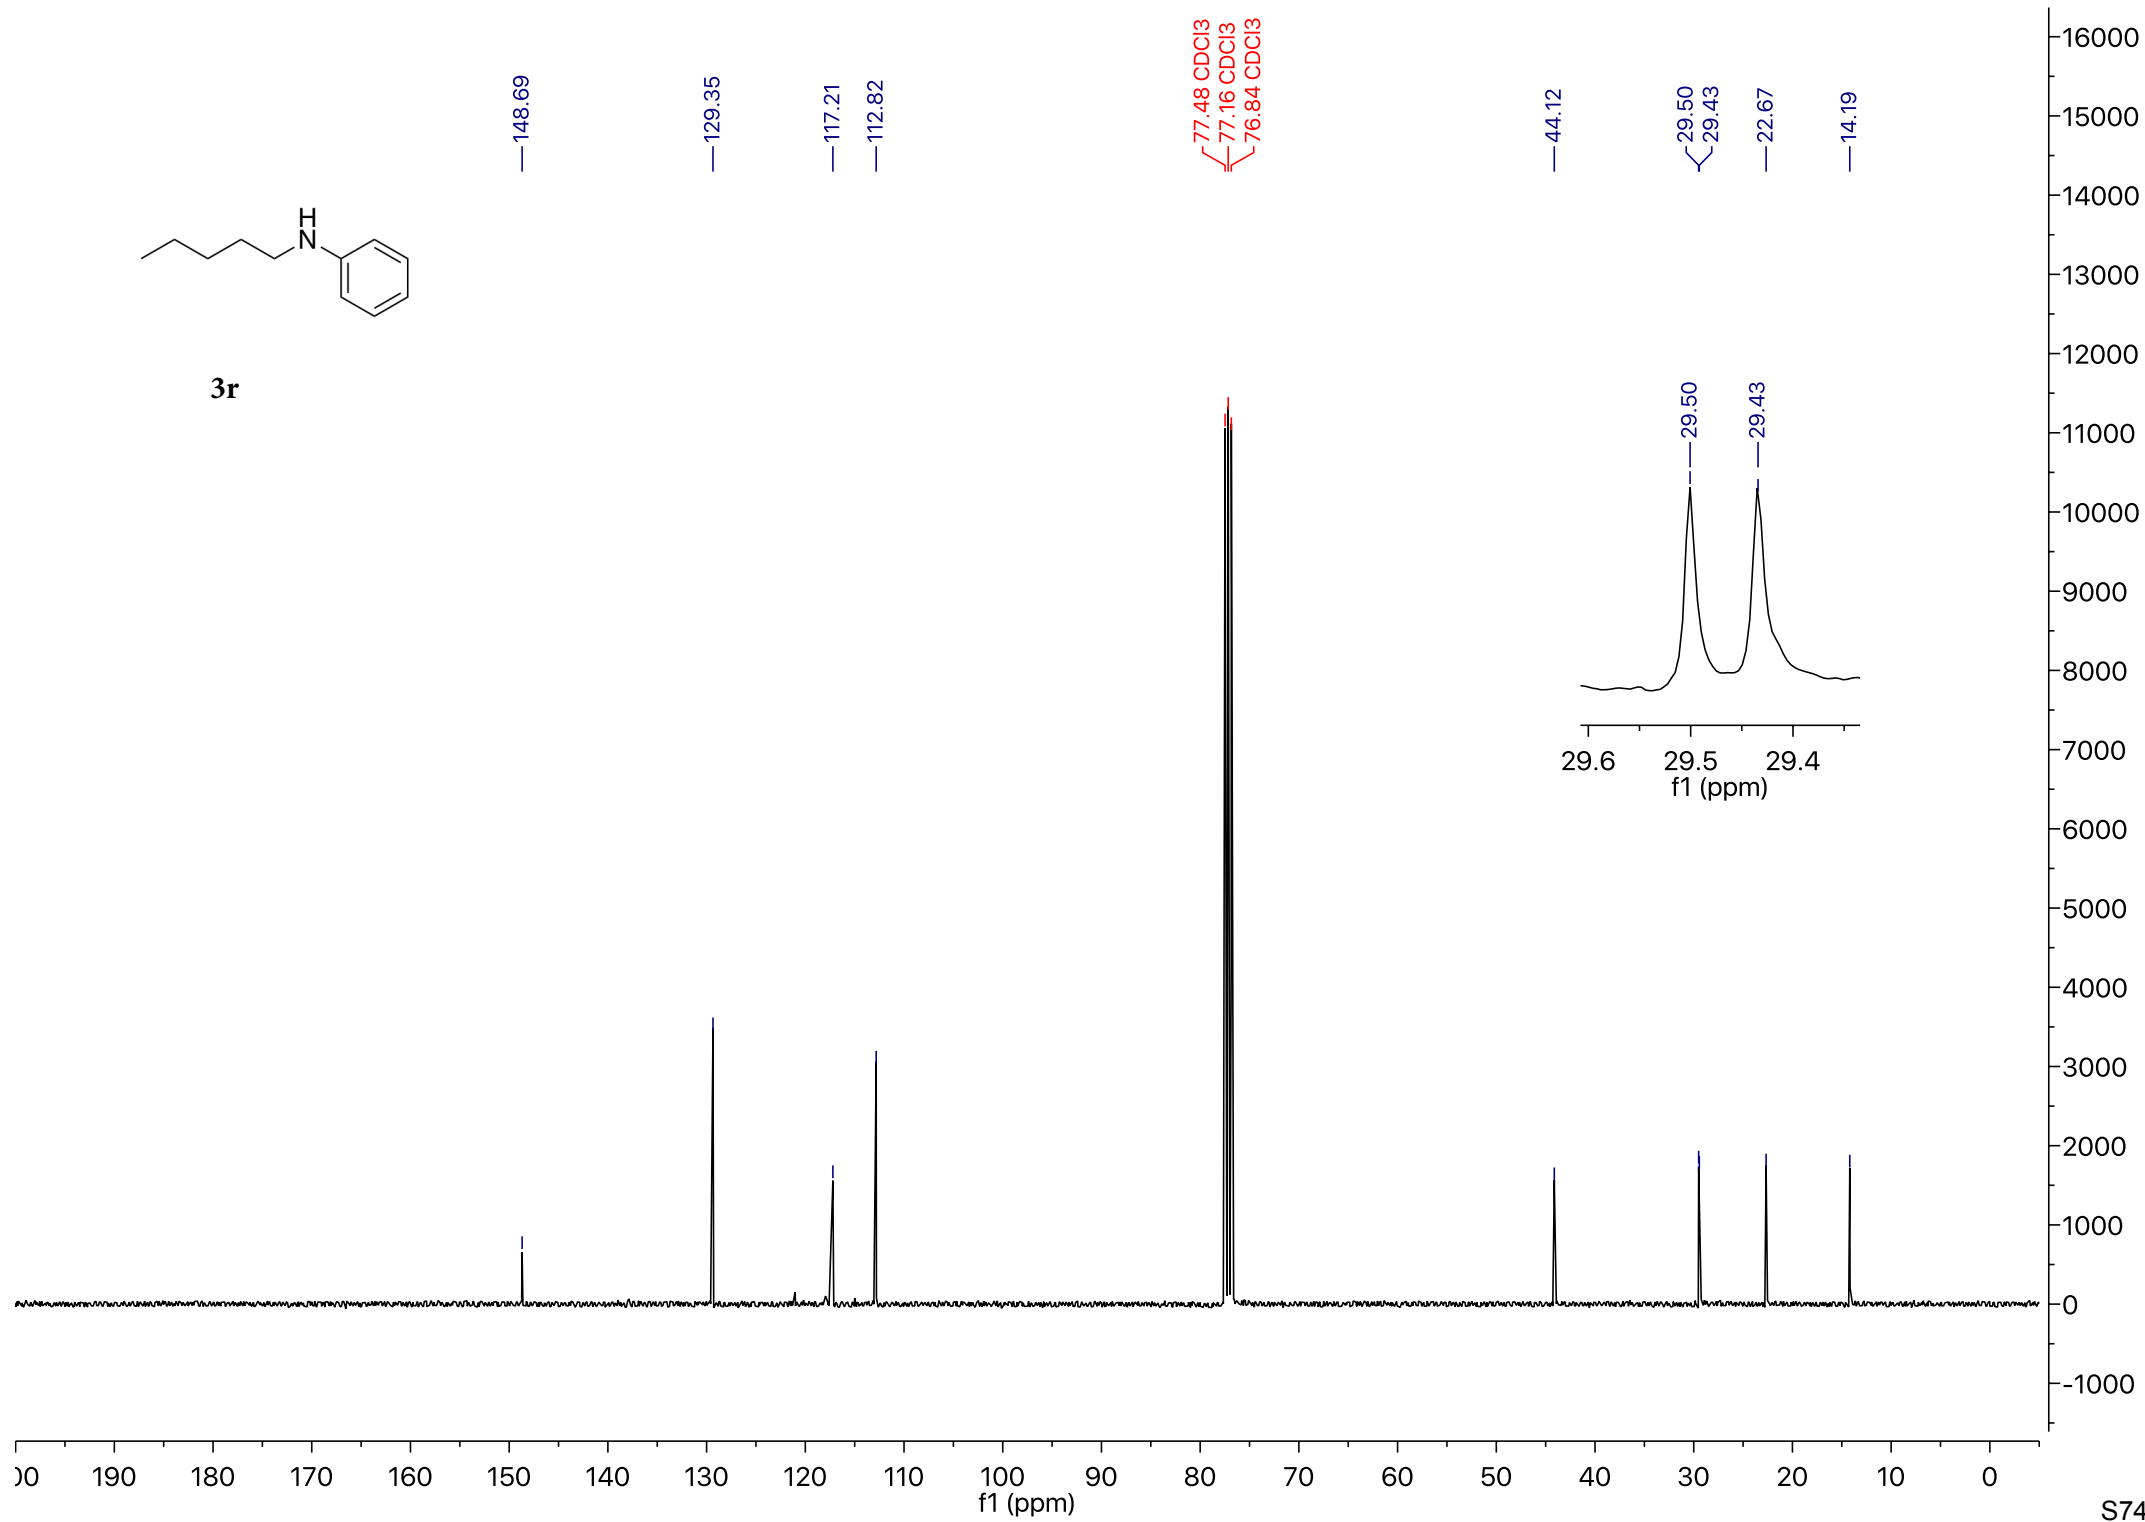

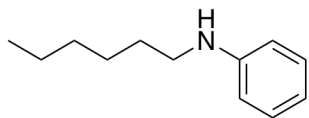

3s

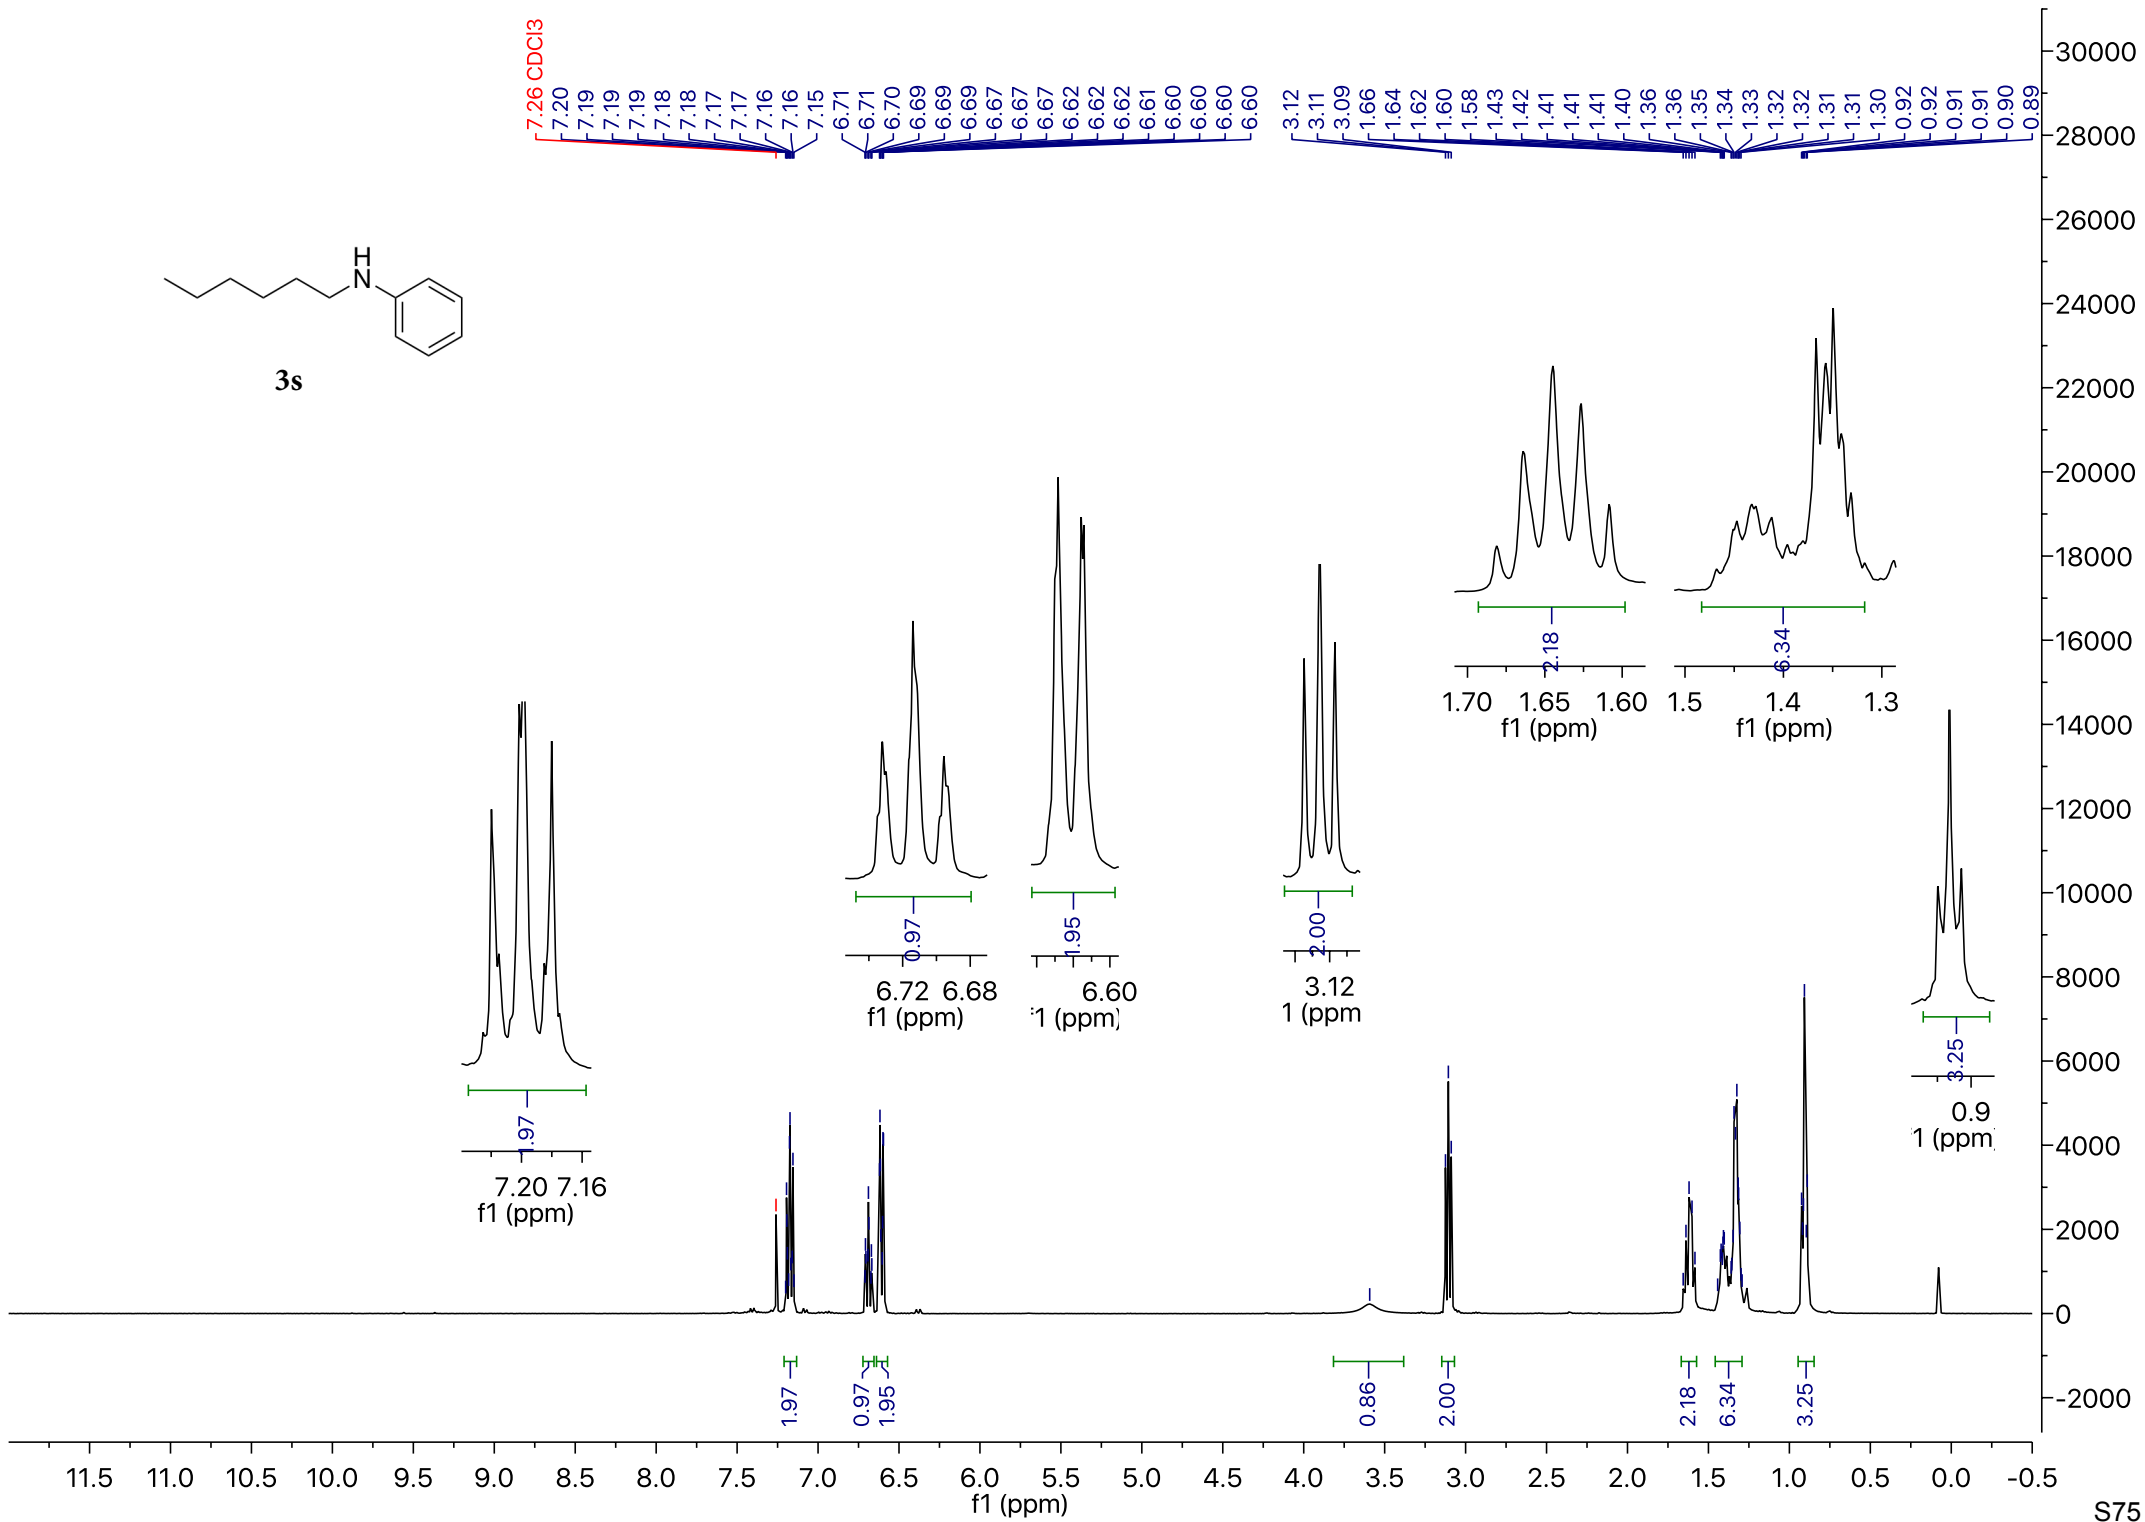



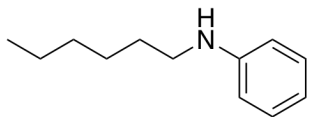

3s

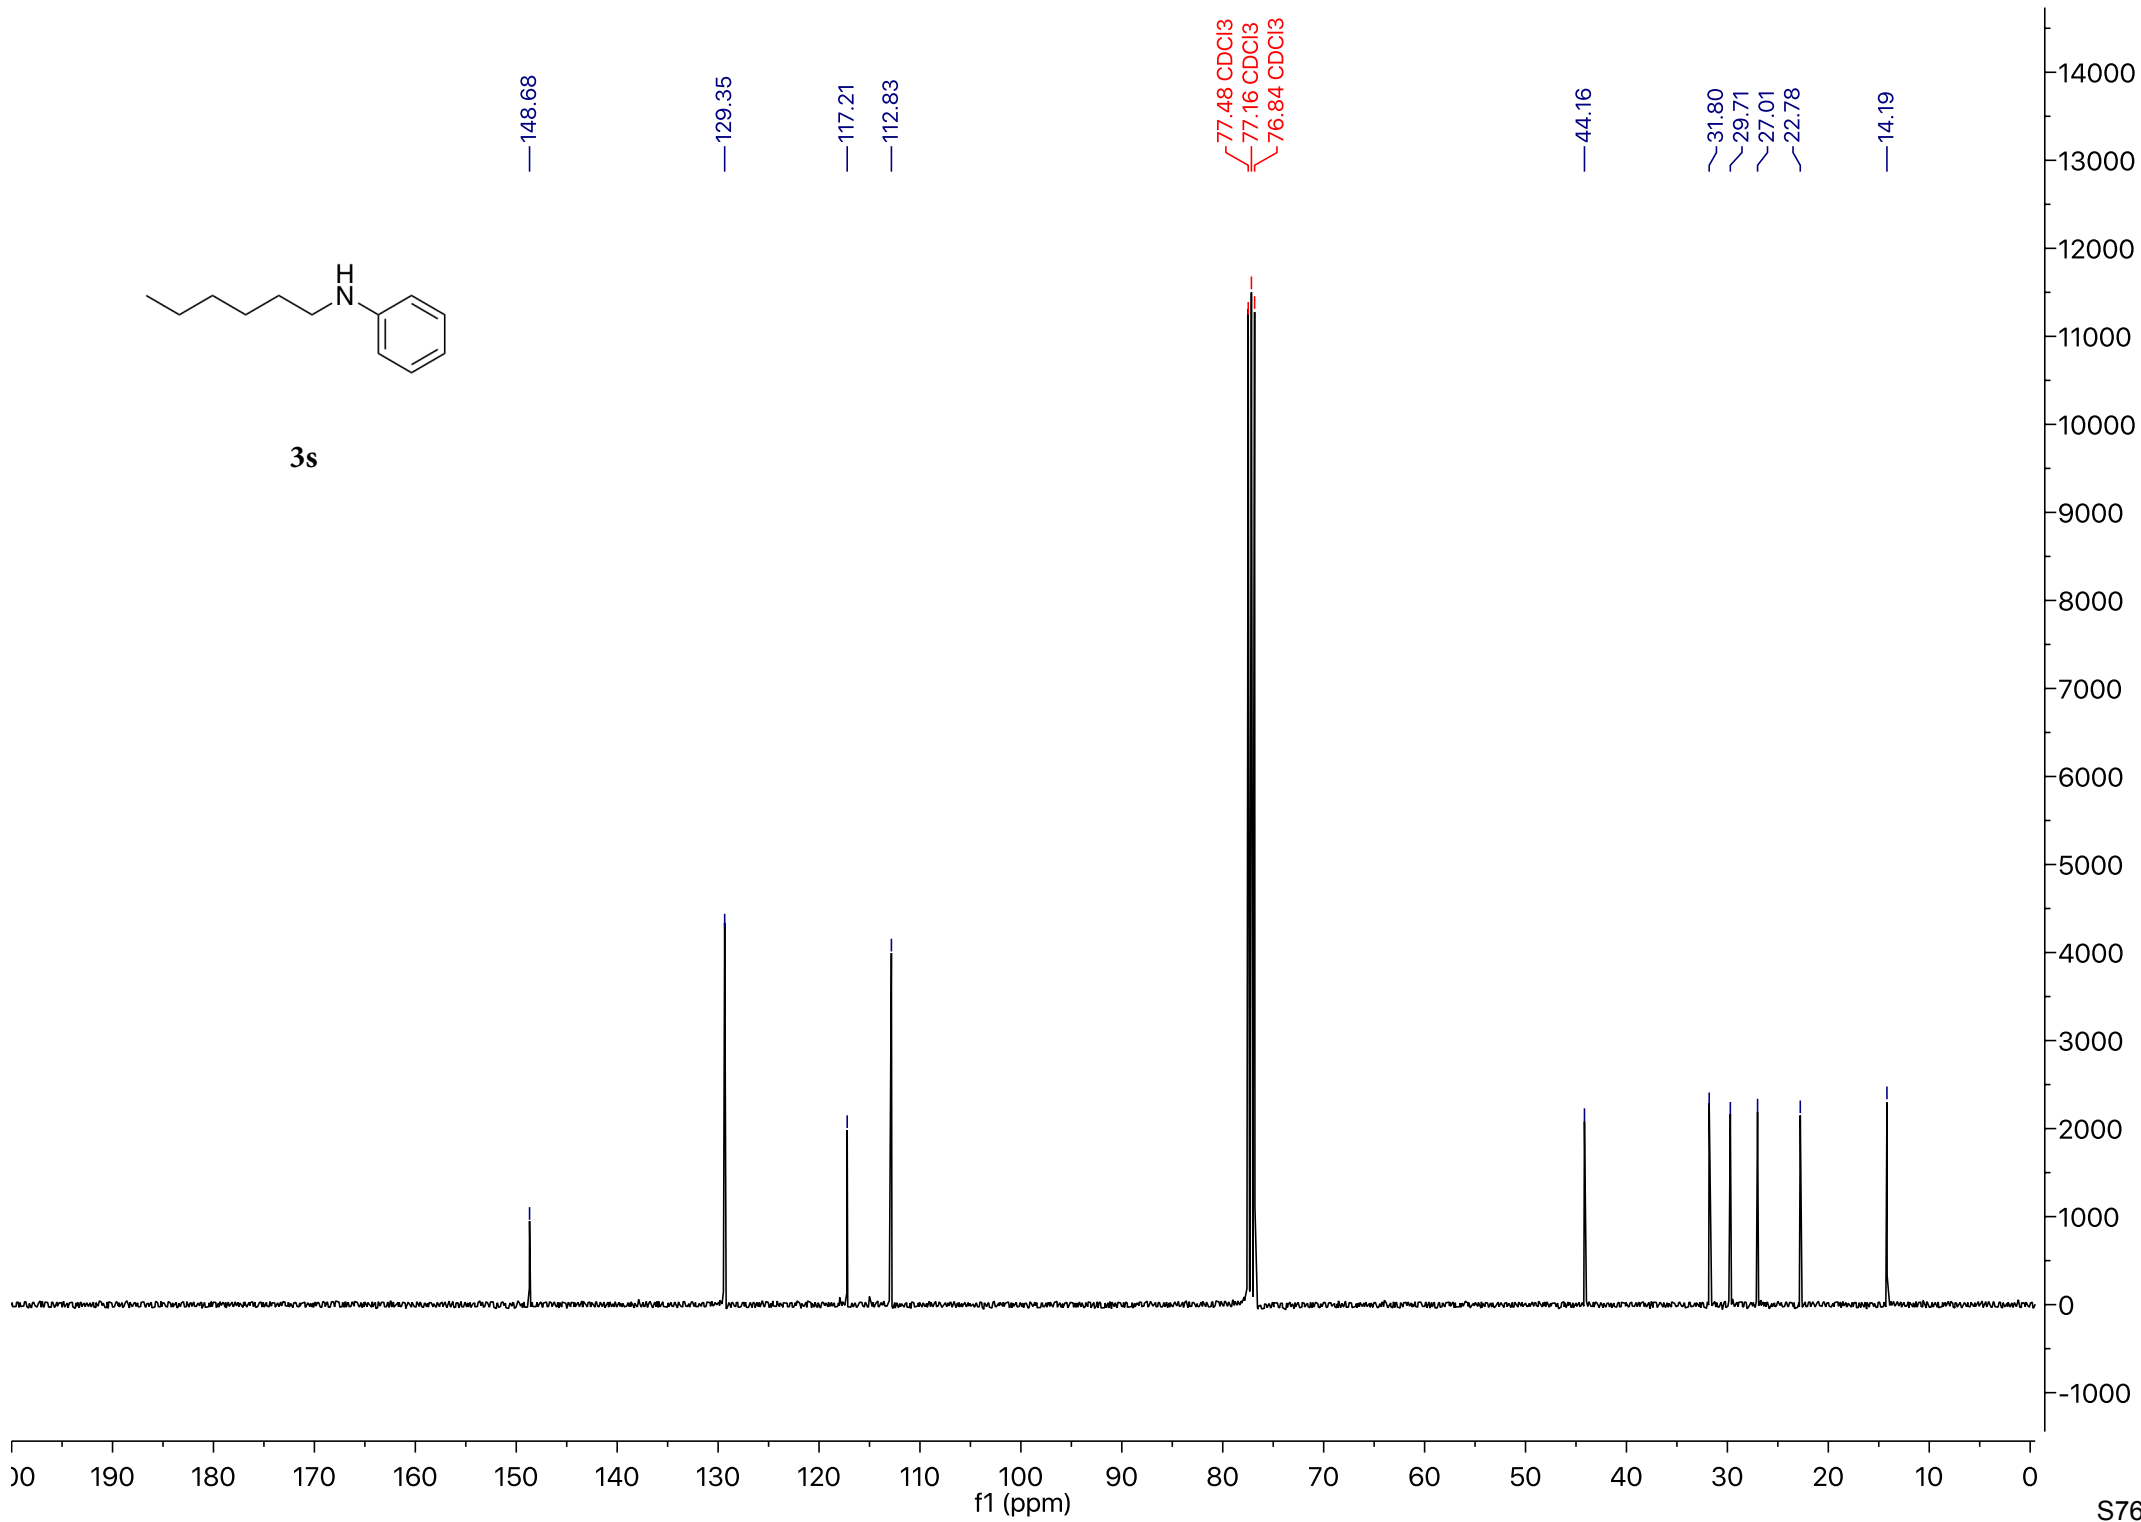

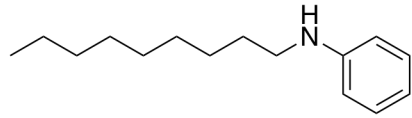

3t

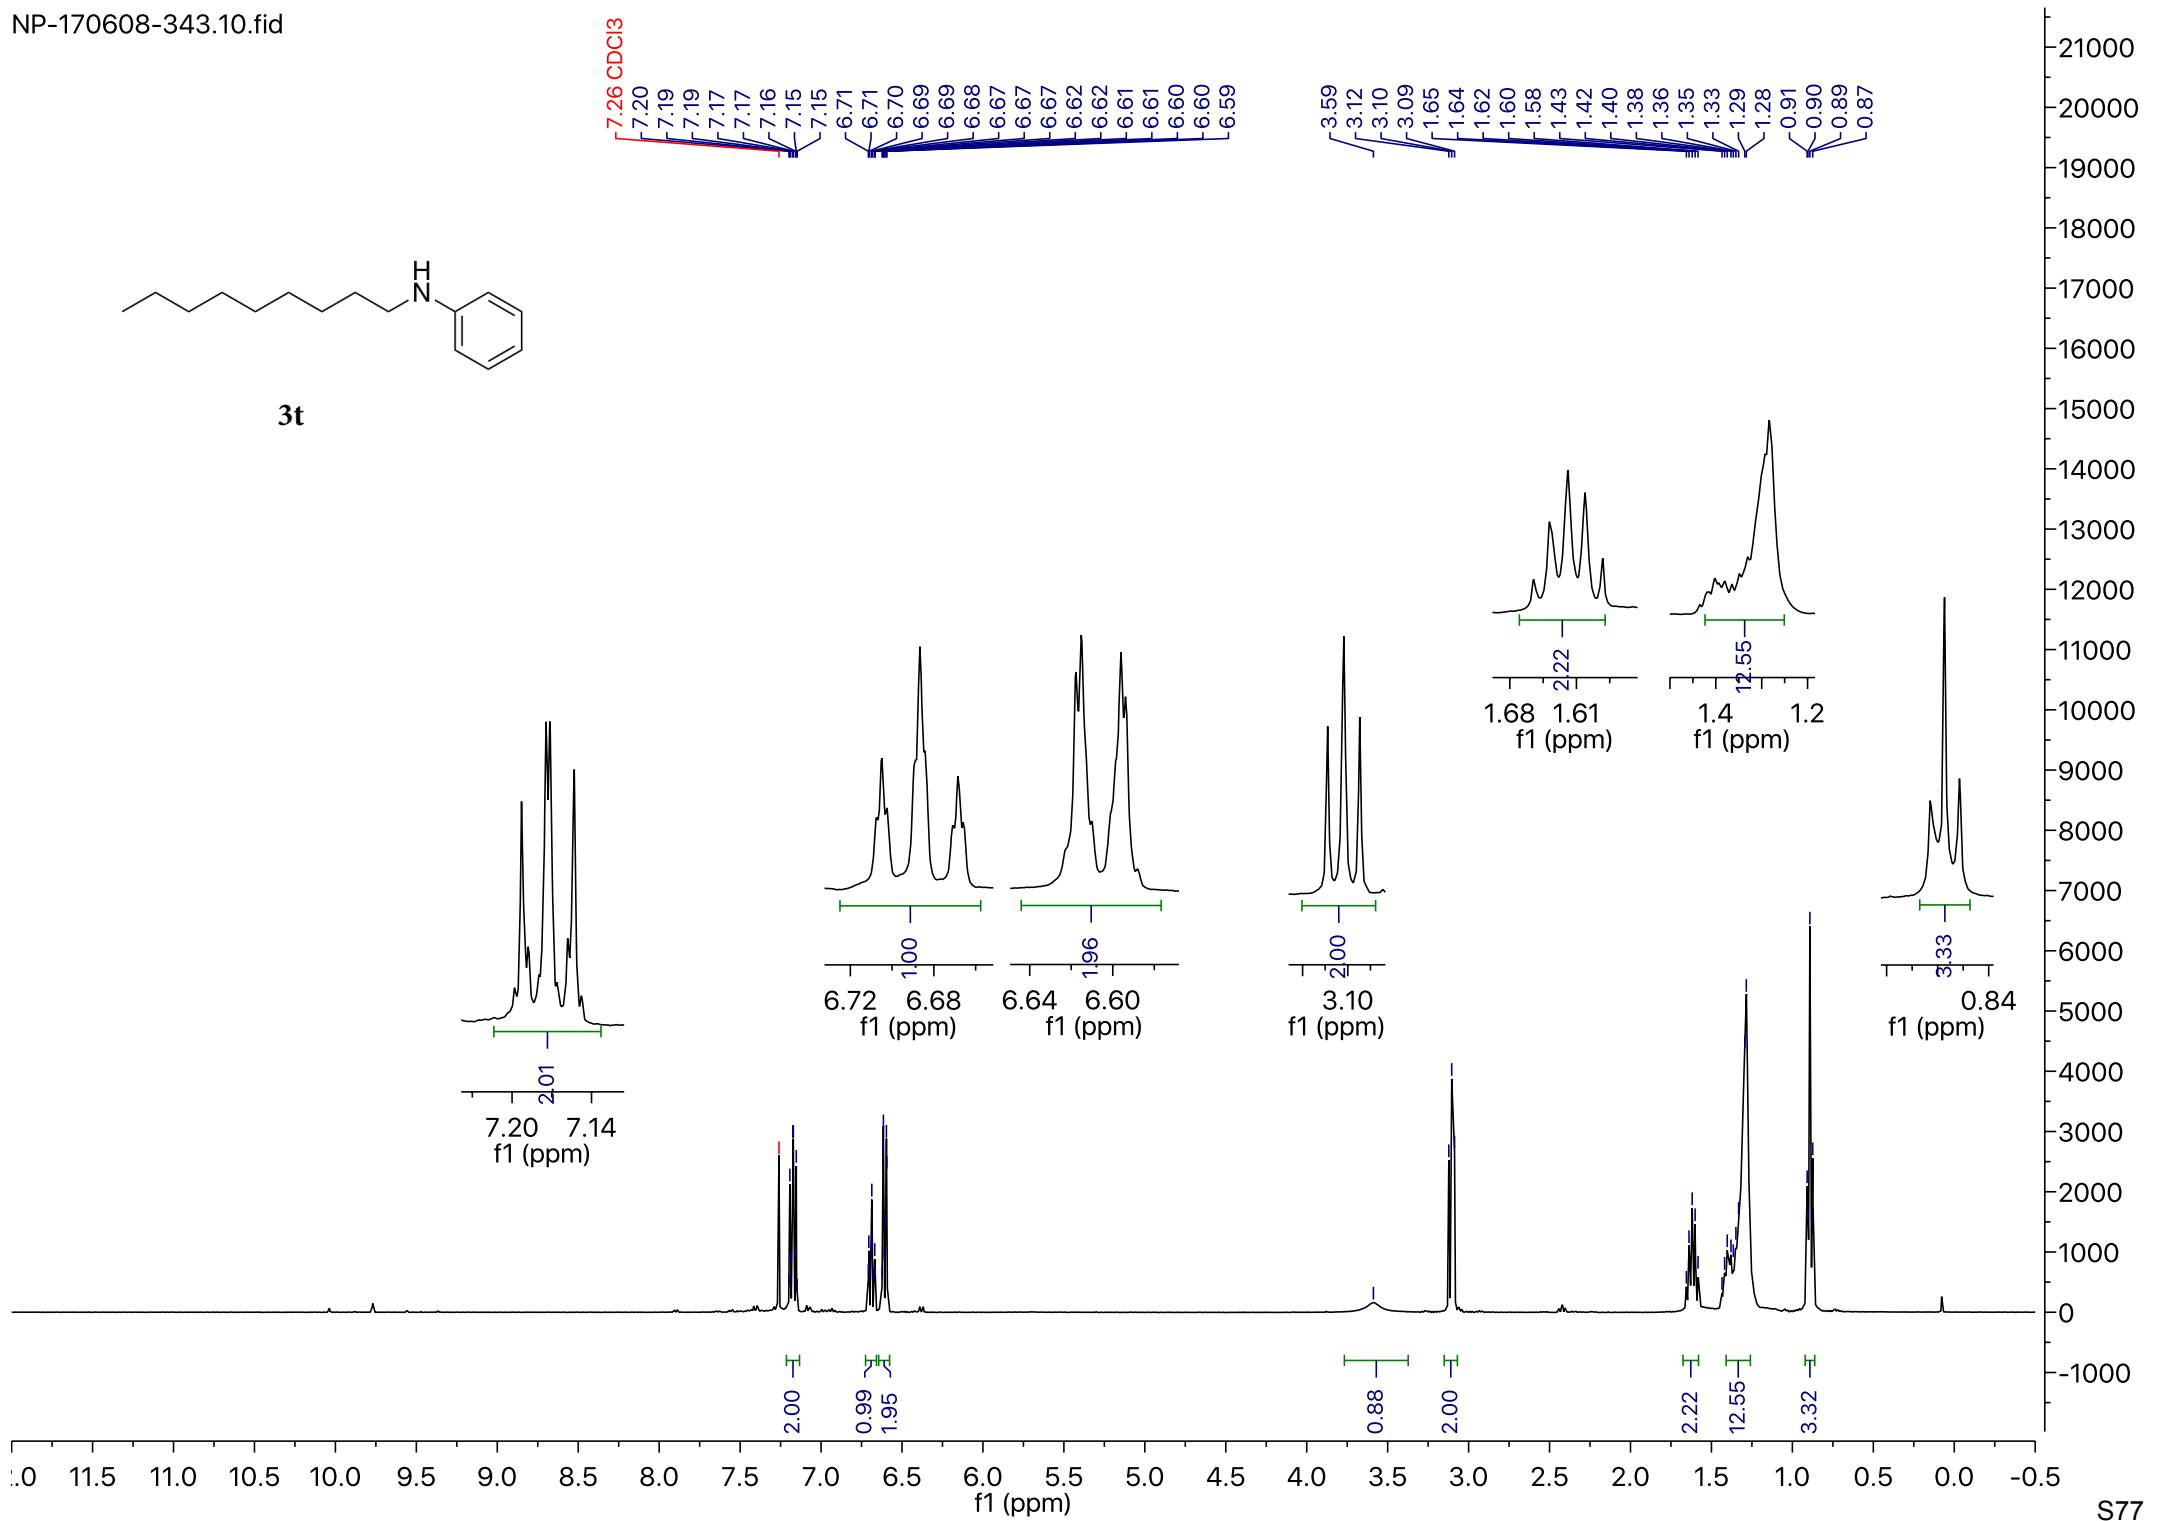

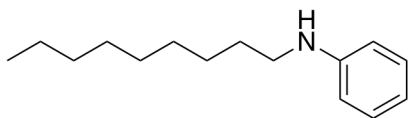

3t

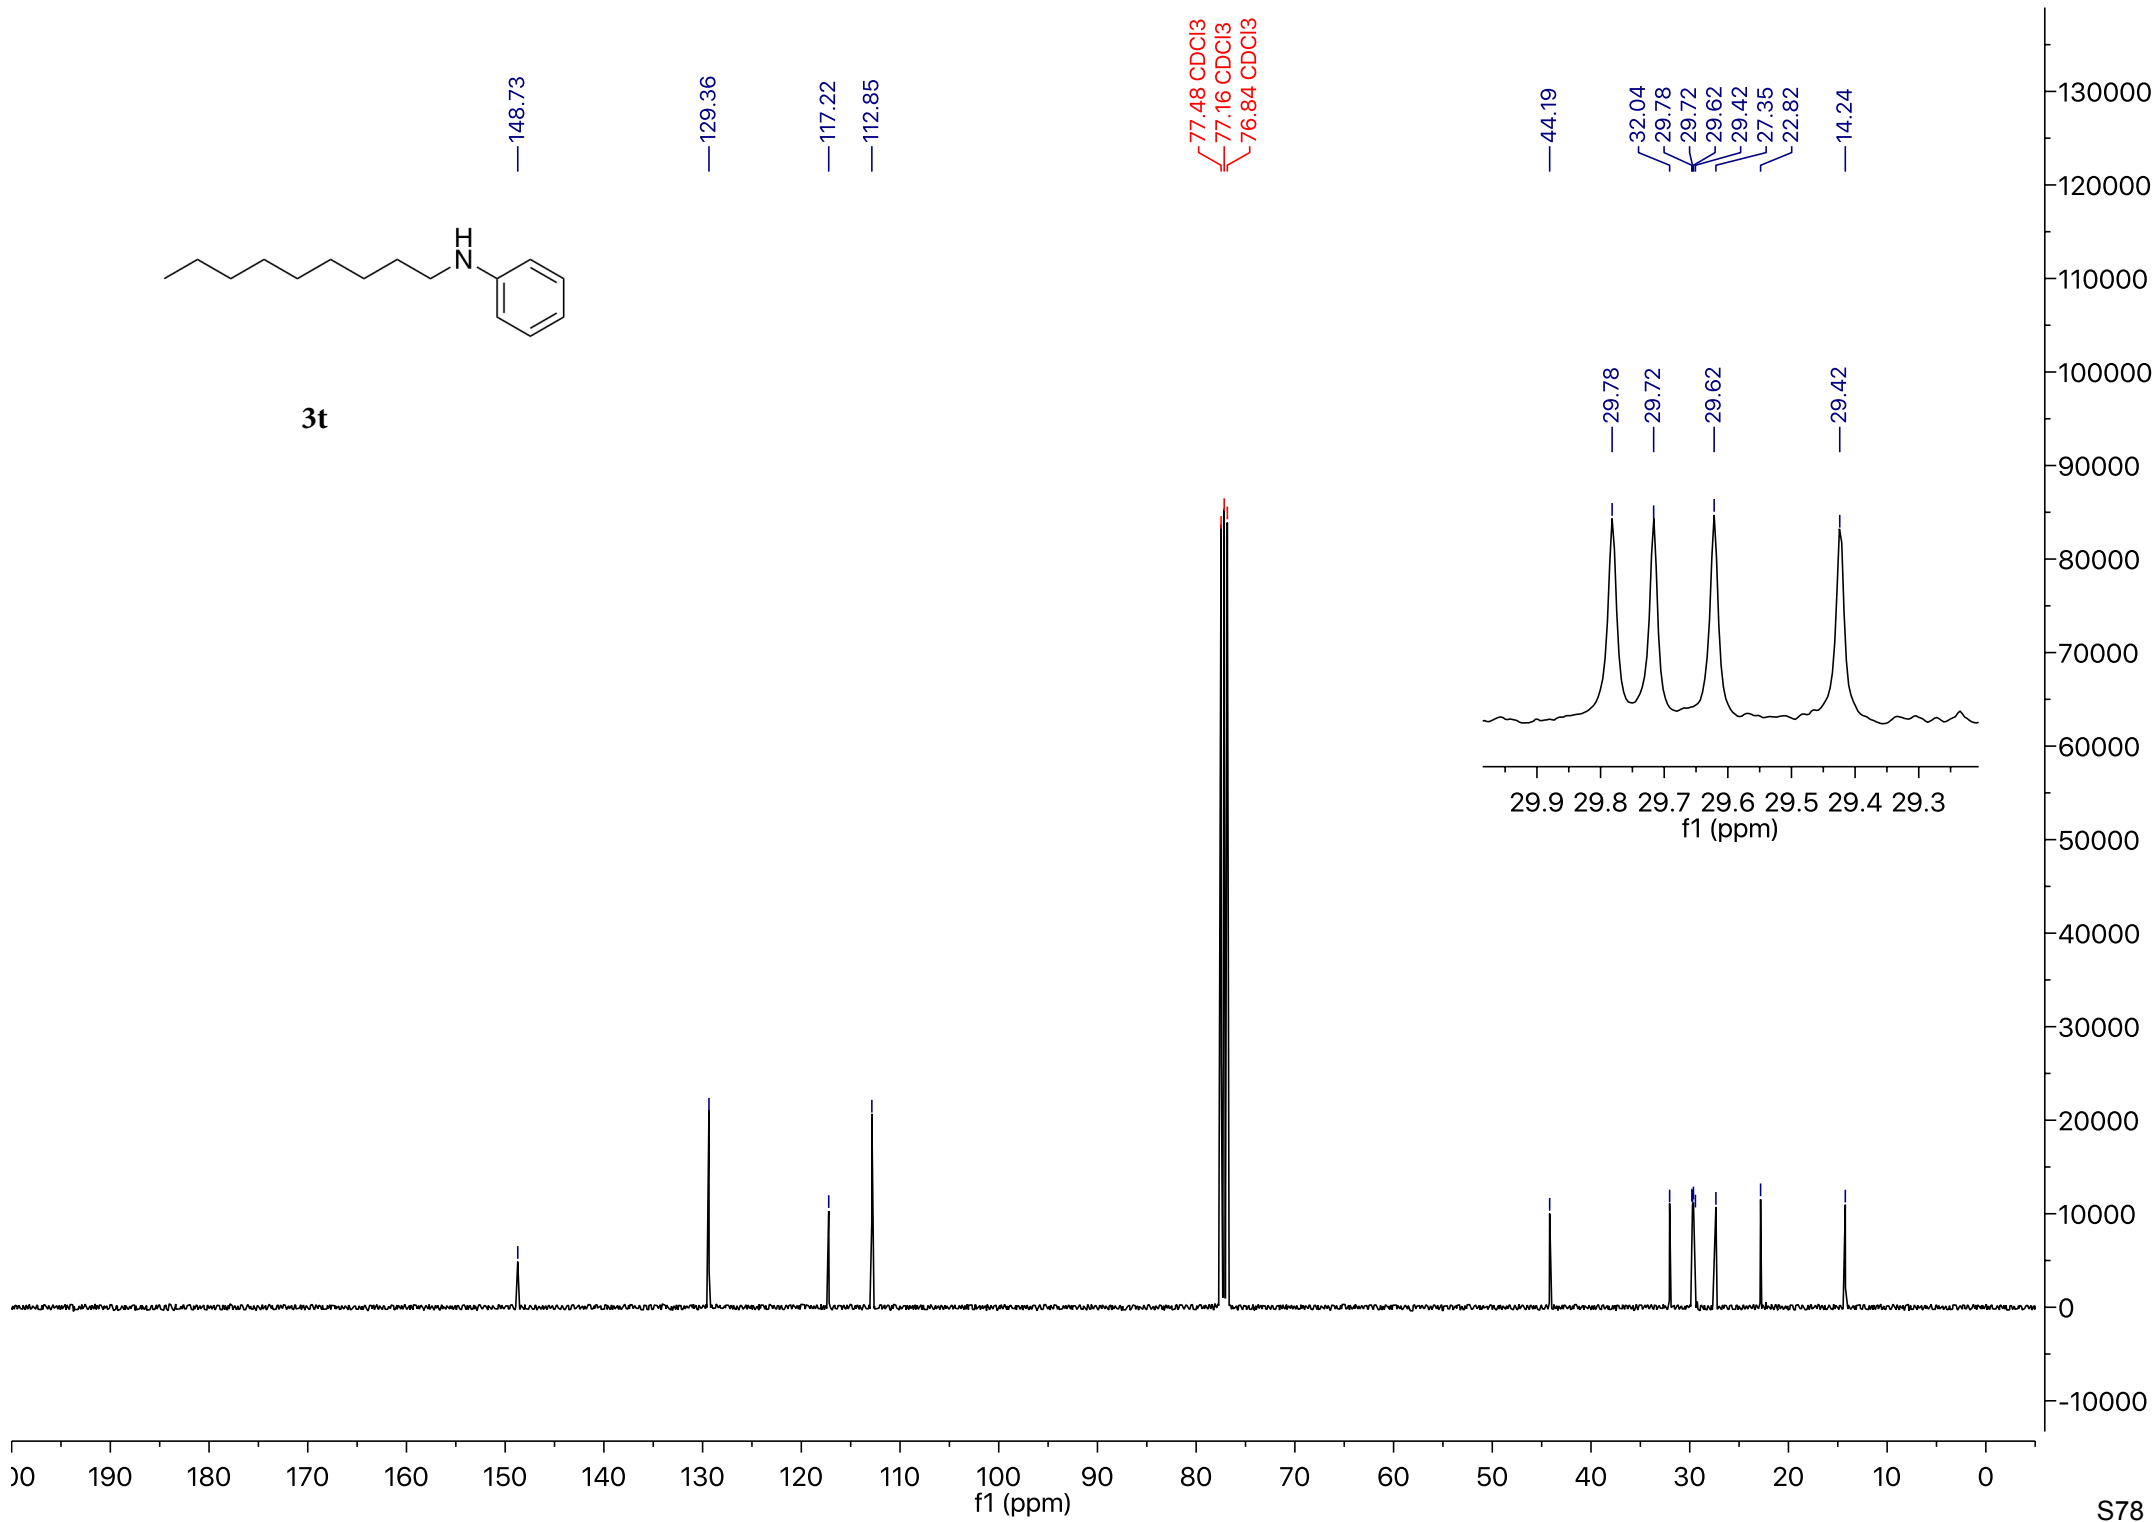

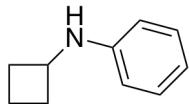

**3u**

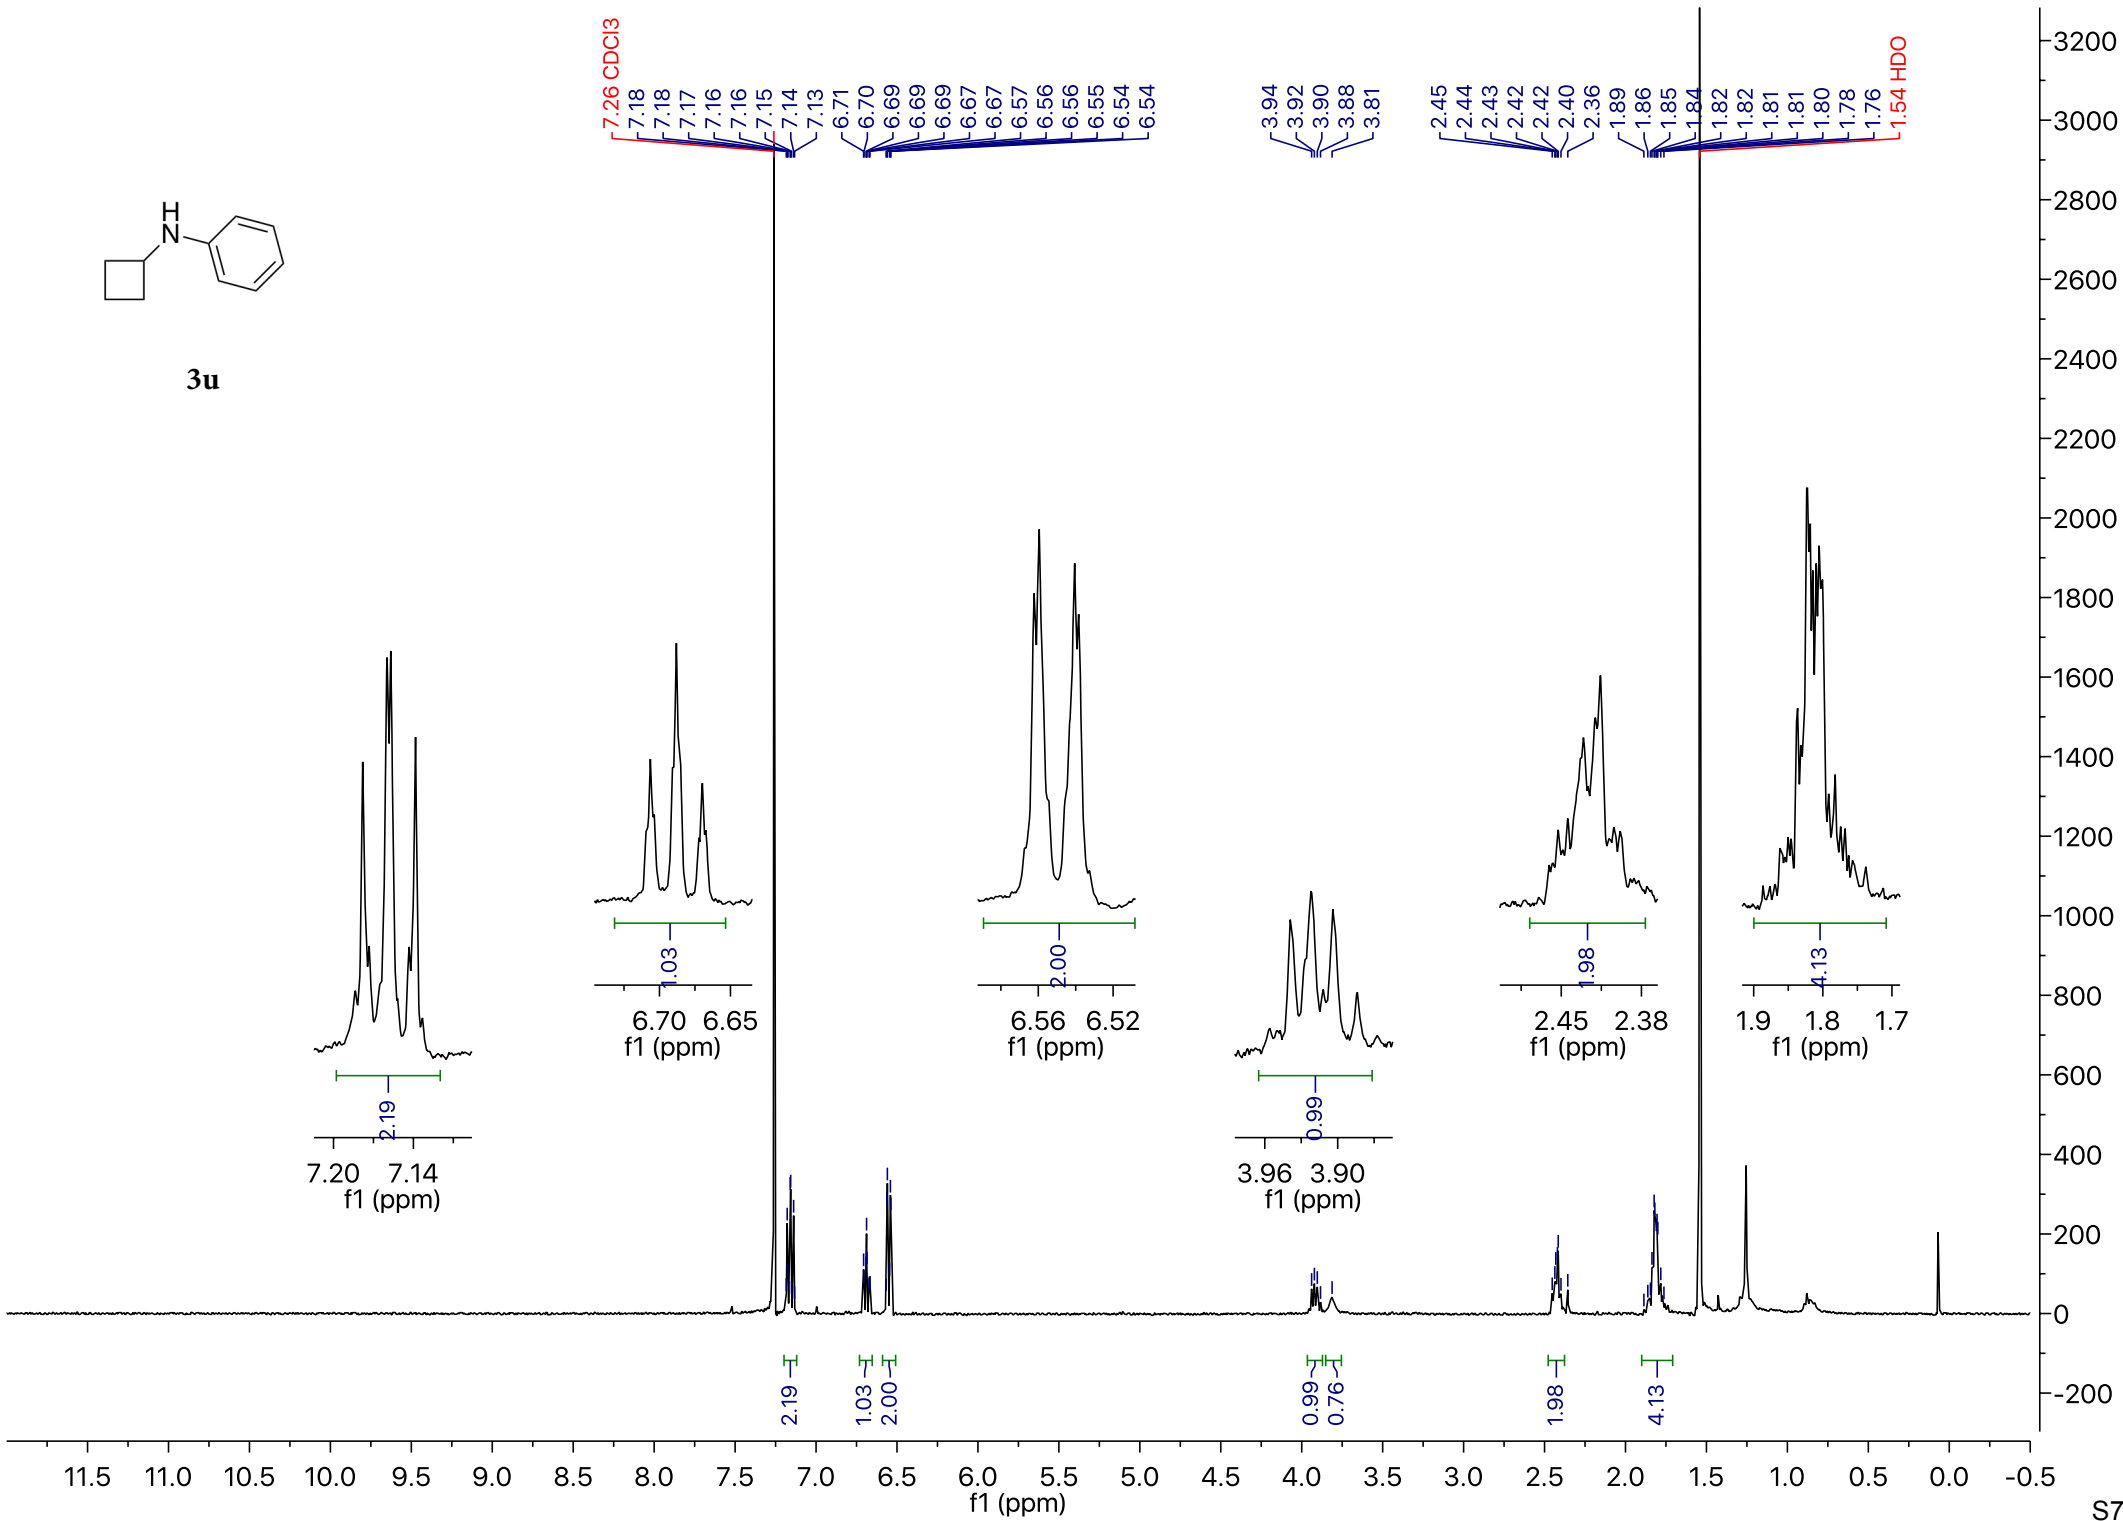

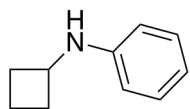

**3u**

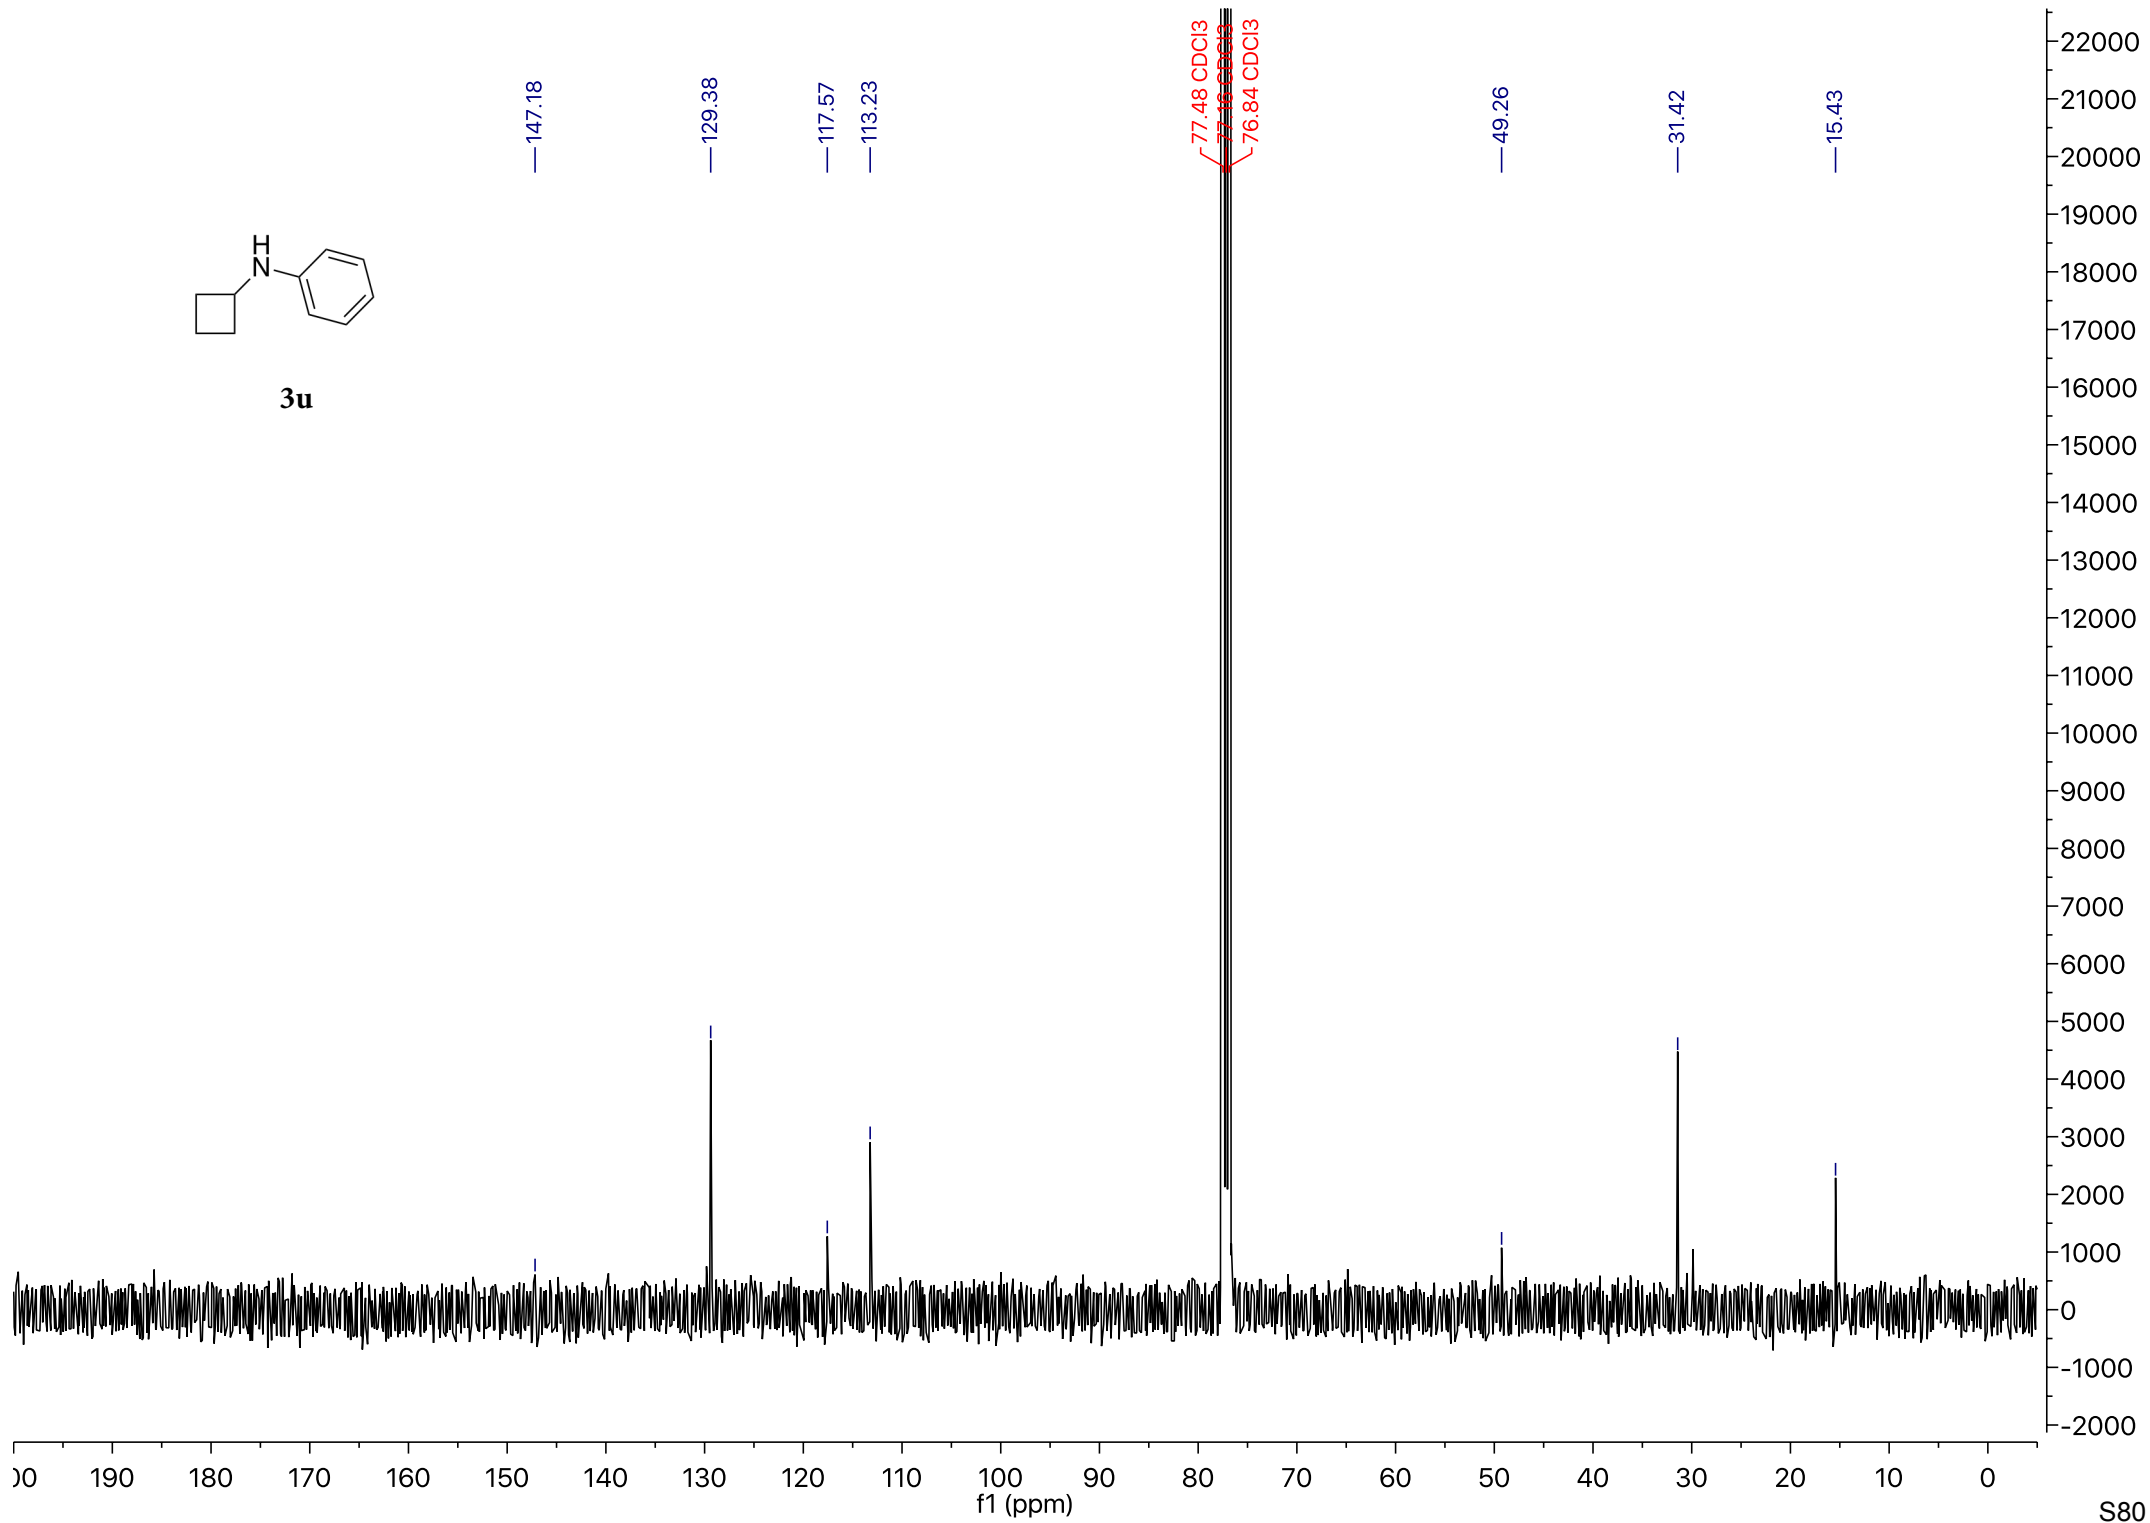

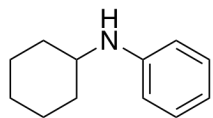

**3v**

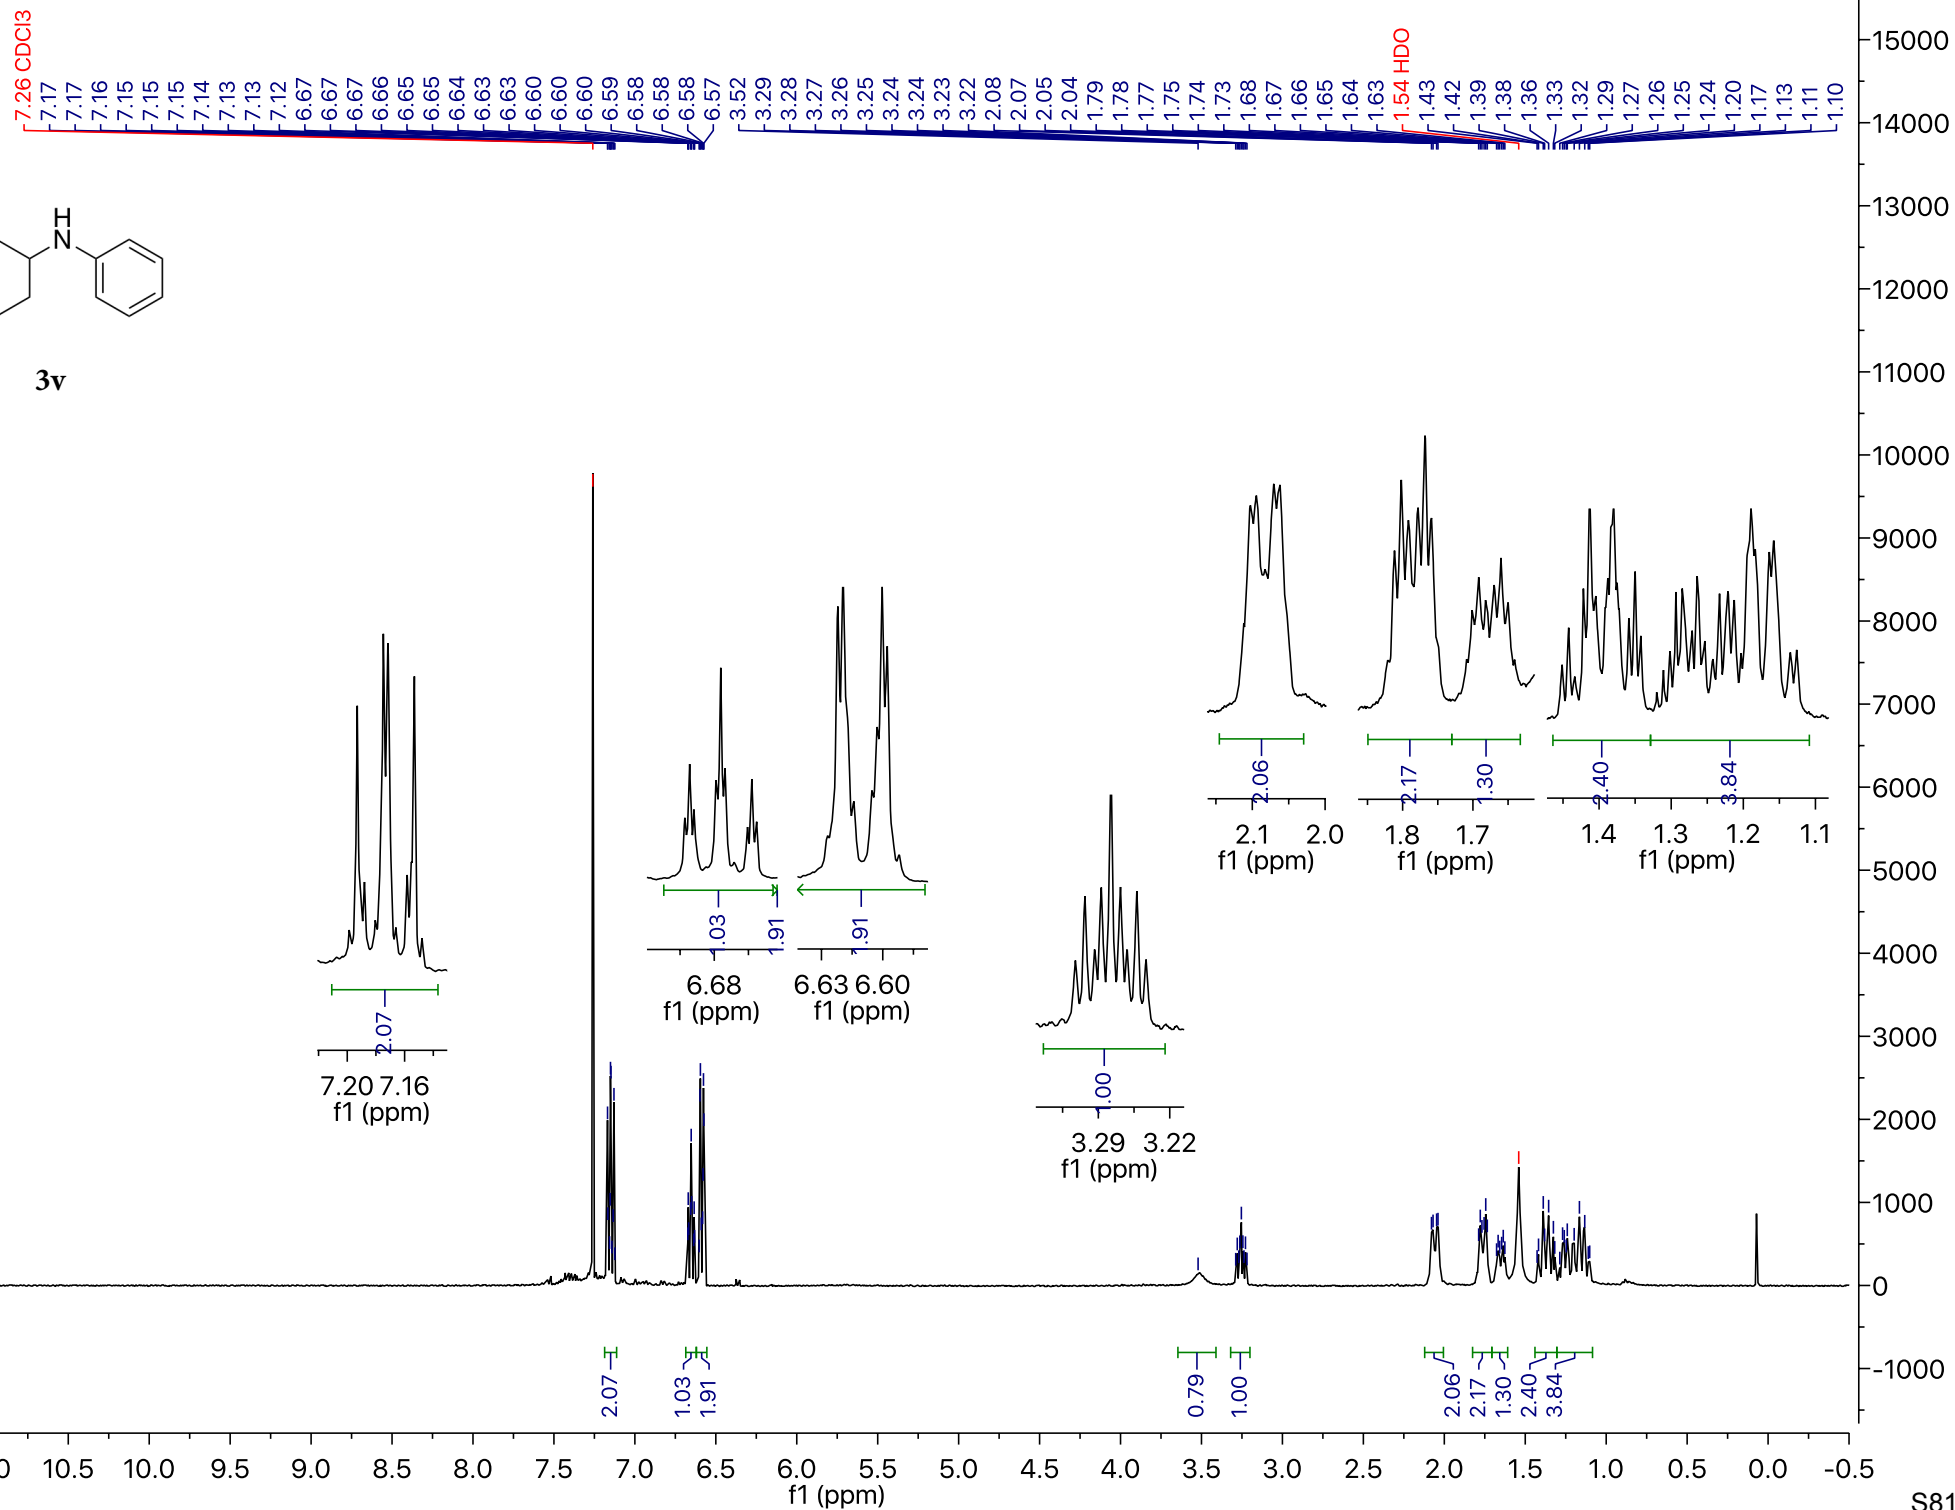

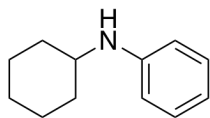

3v

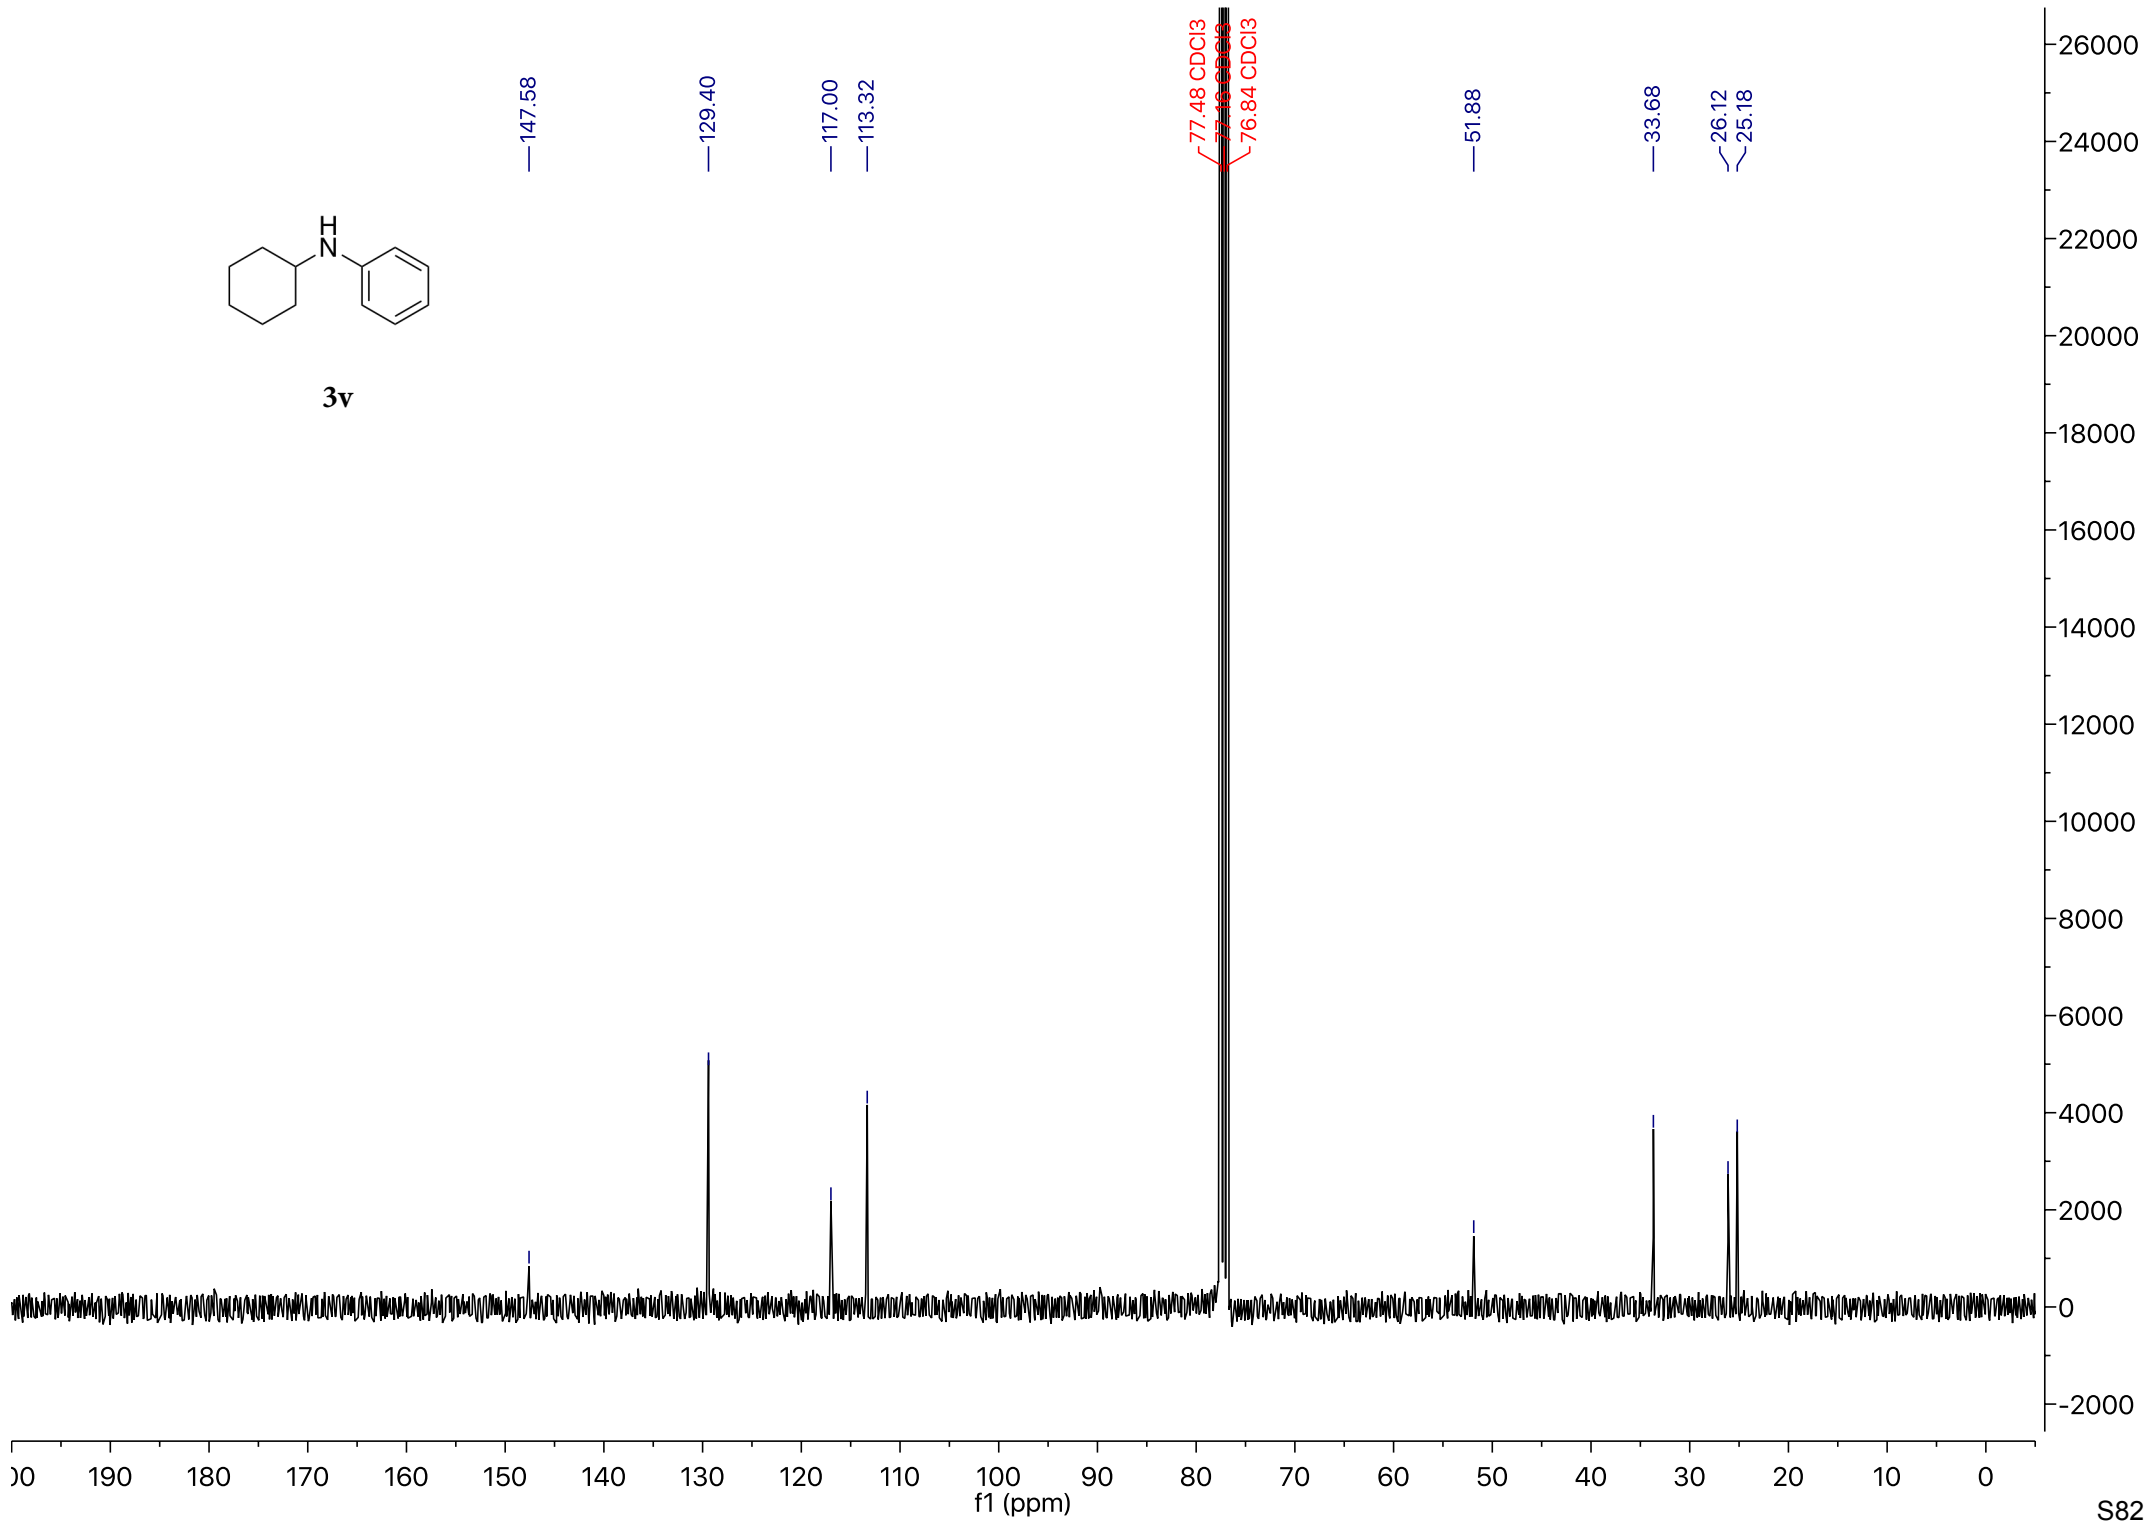

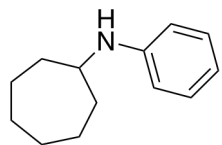

3w

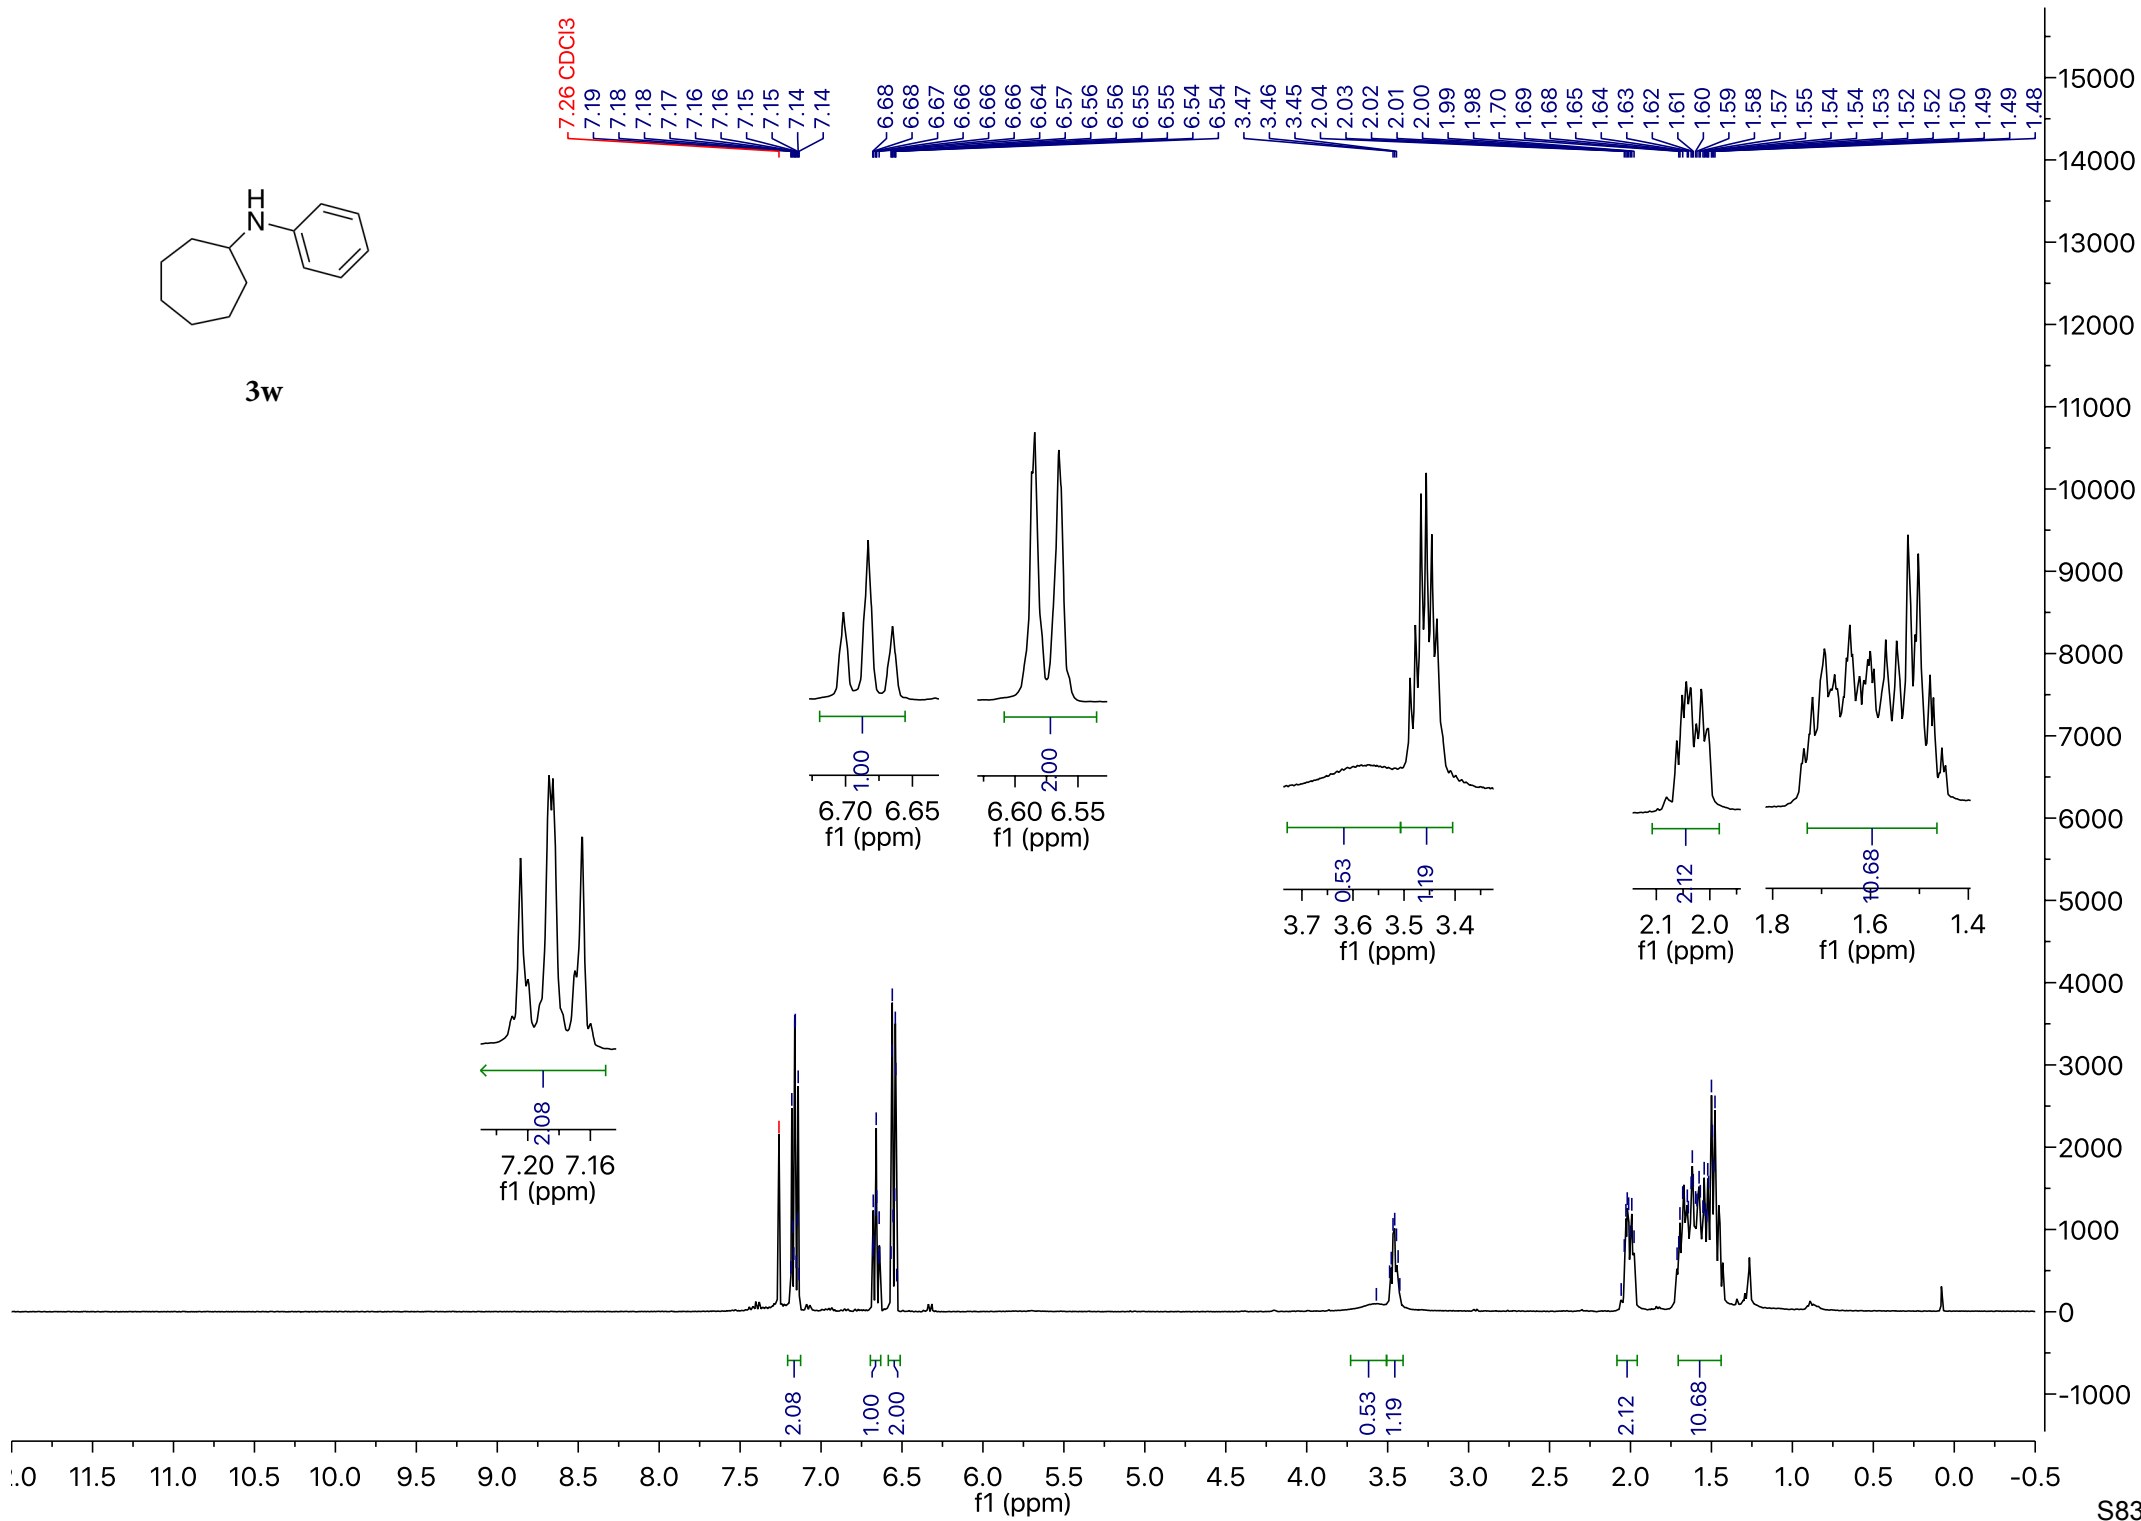



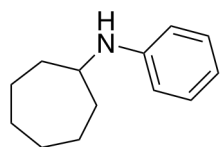

**3w**

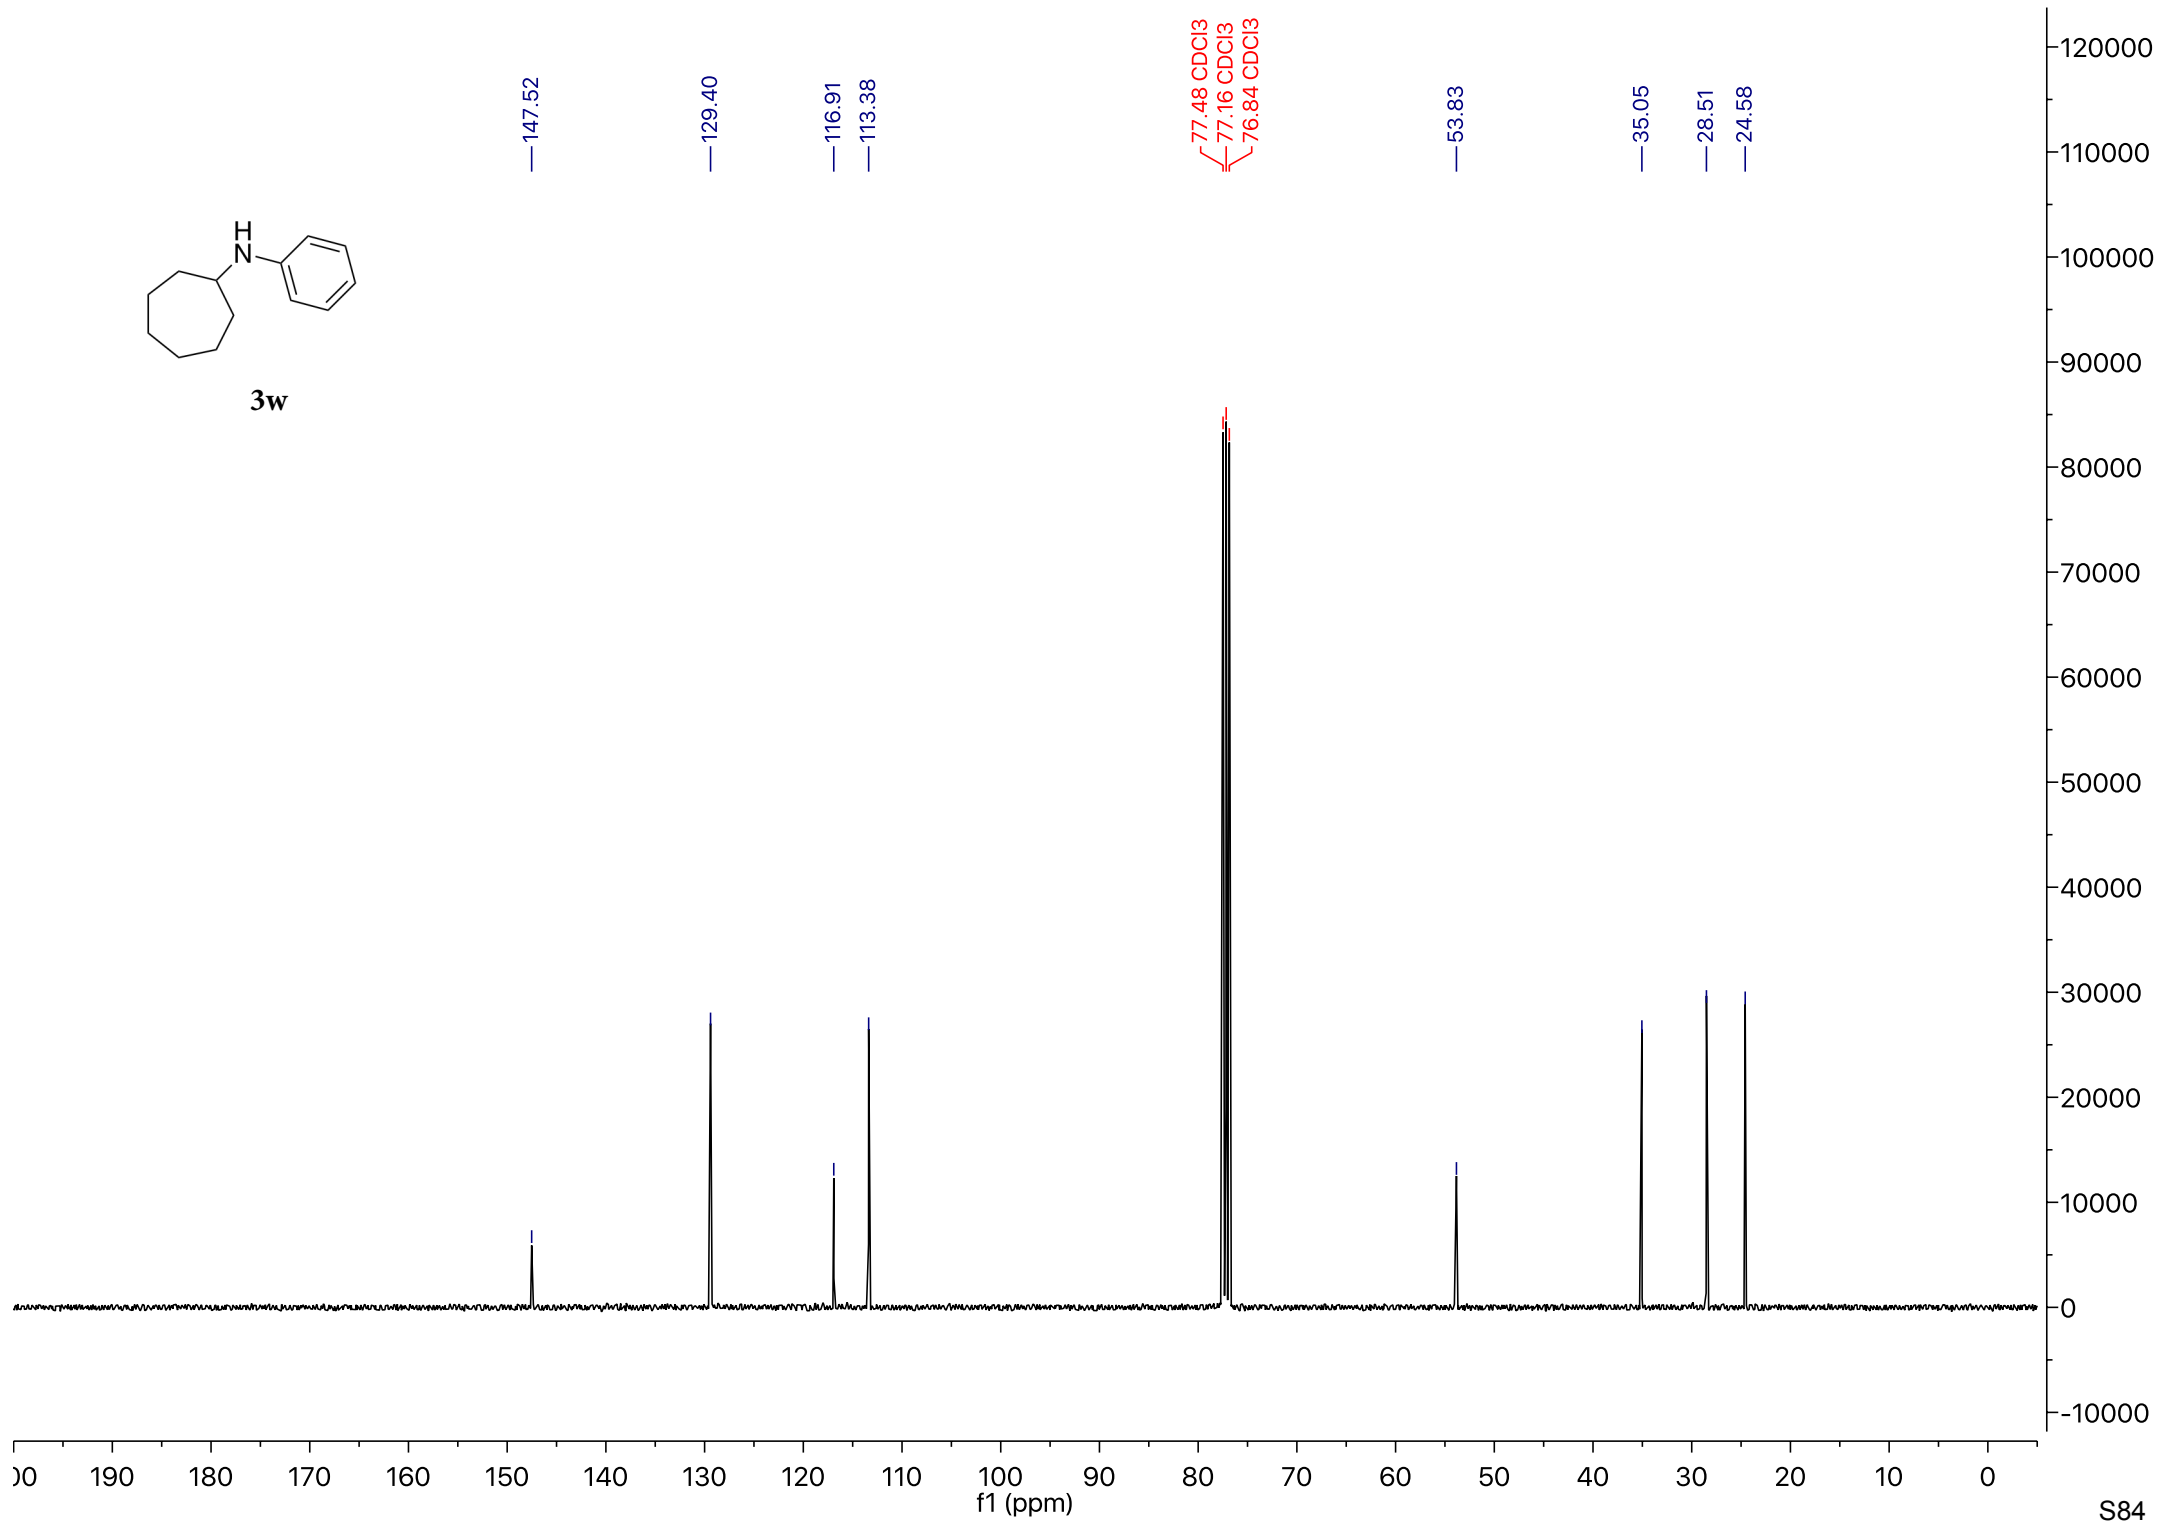

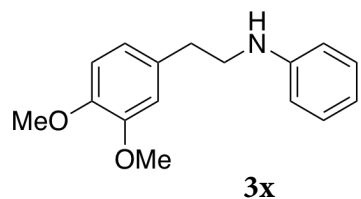

7.26 CDCI3  
 7.21  
 7.20  
 7.20  
 7.20  
 7.19  
 7.18  
 7.18  
 7.18  
 7.17  
 7.17  
 7.16  
 7.16  
 7.16  
 6.84  
 6.82  
 6.78  
 6.76  
 6.76  
 6.73  
 6.73  
 6.71  
 6.71  
 6.69  
 6.69  
 6.69  
 6.64  
 6.63  
 6.63  
 6.62  
 6.61  
 6.61  
 6.60  
 3.87  
 3.86  
 3.41  
 3.39  
 3.37  
 2.89  
 2.87  
 2.85

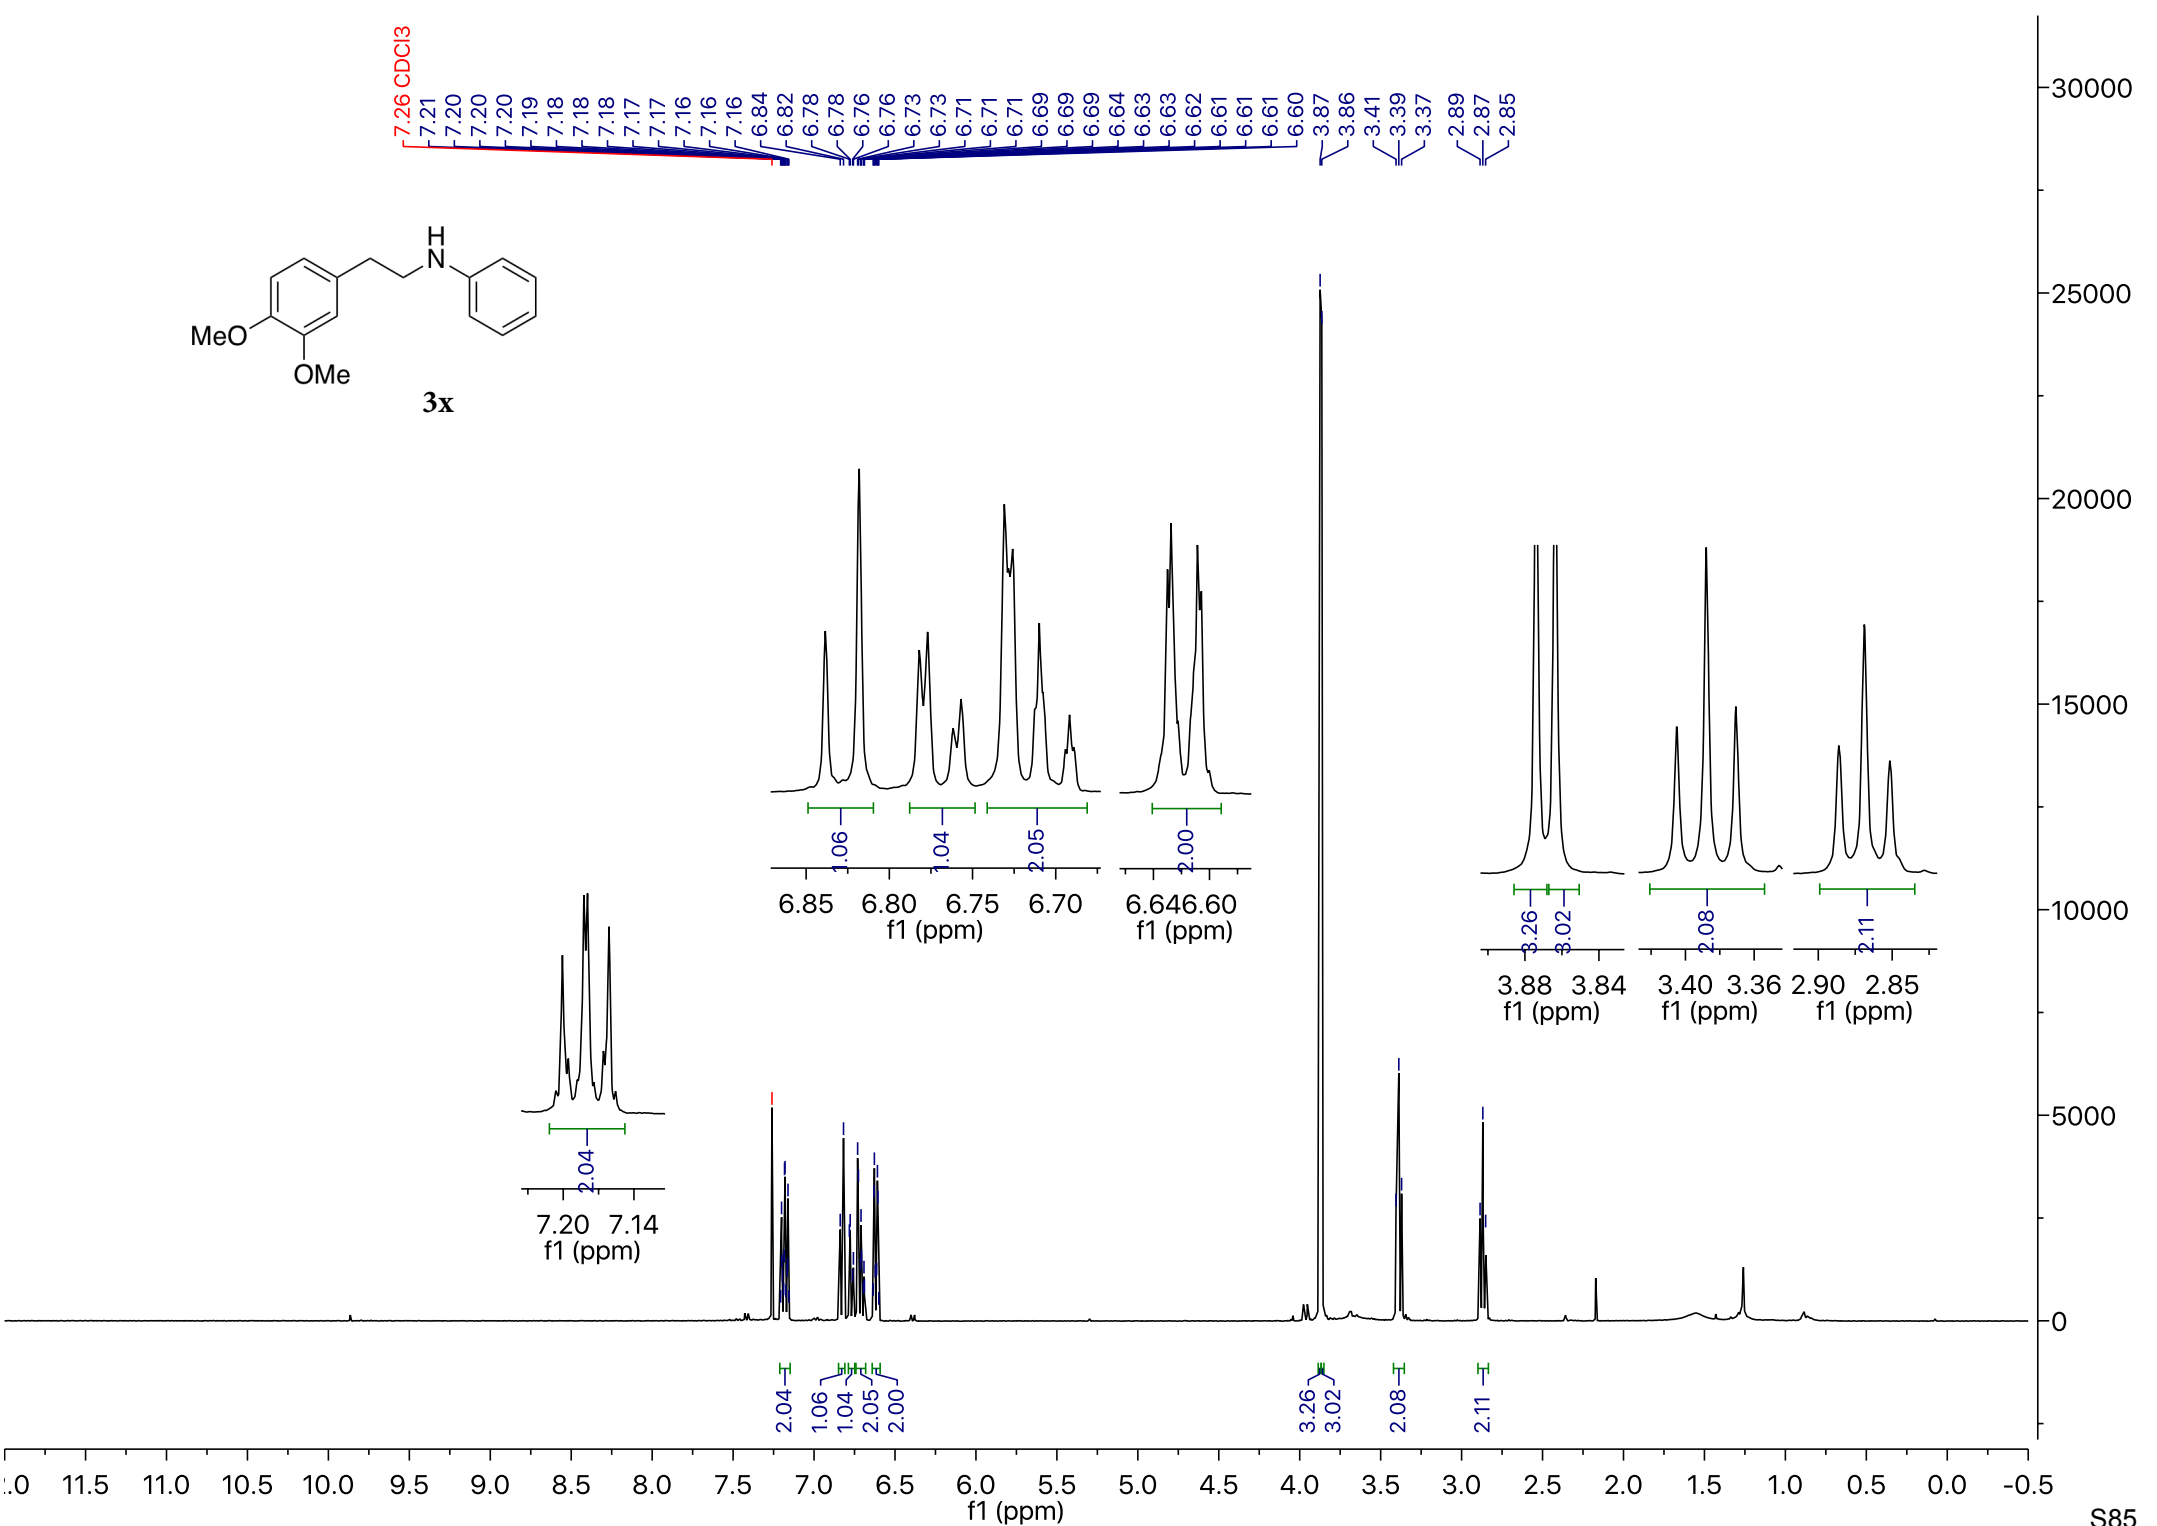

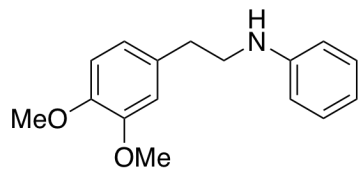

3x

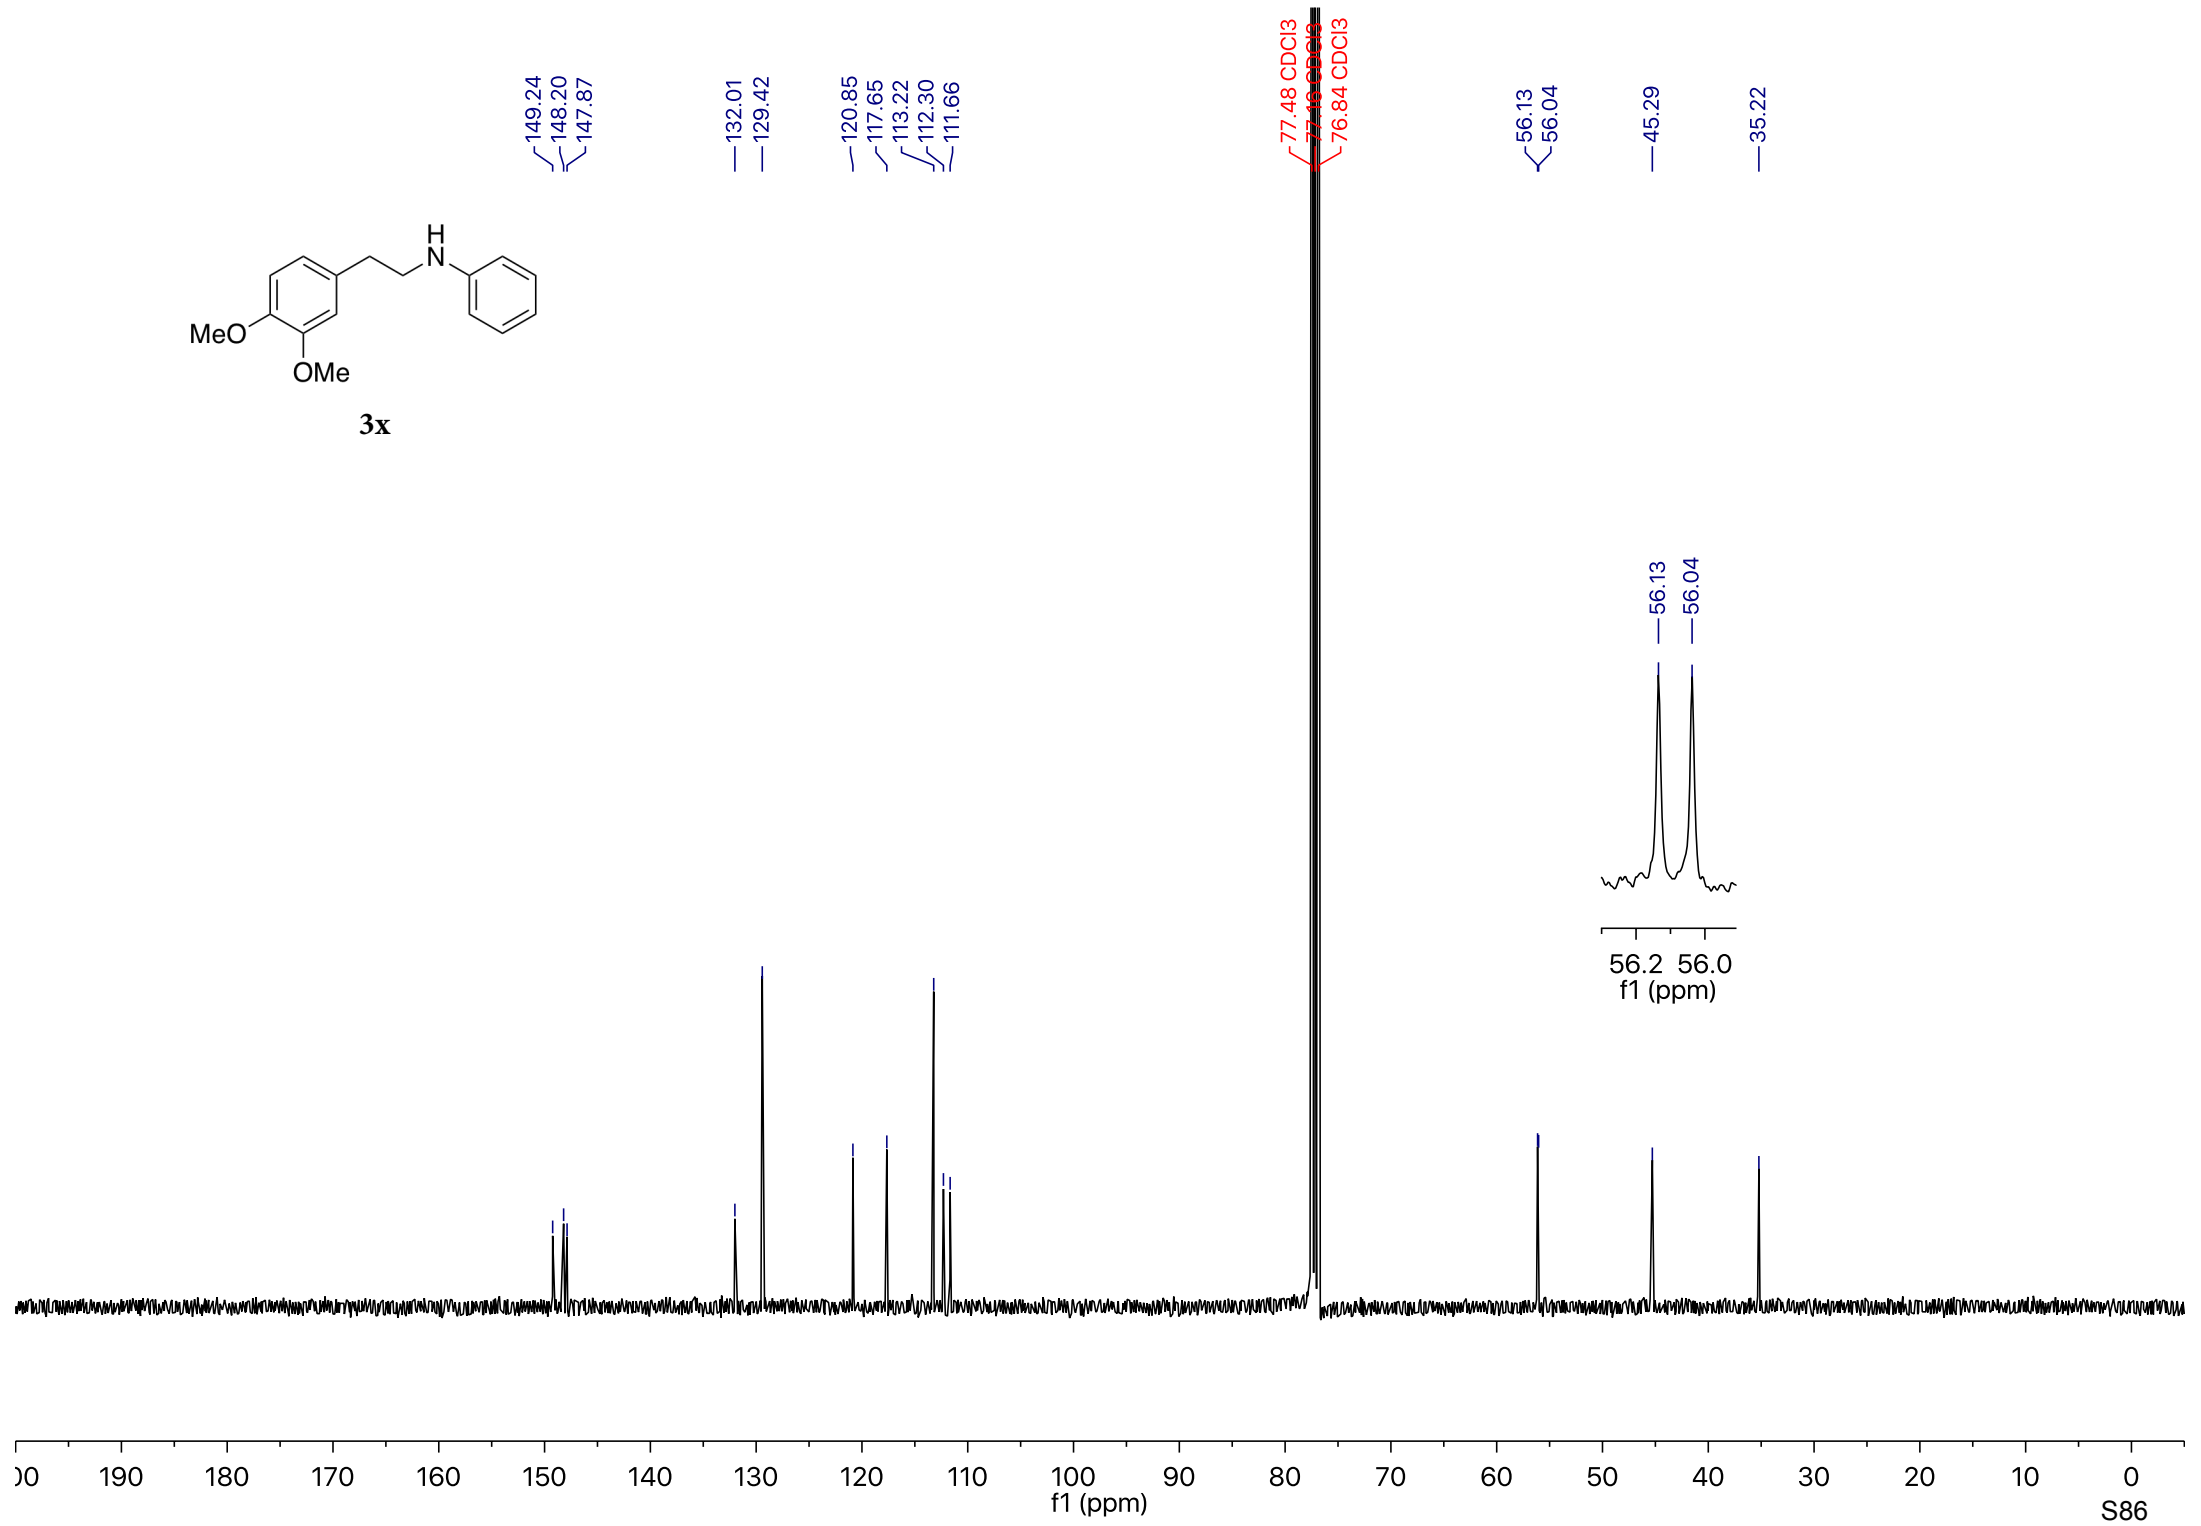

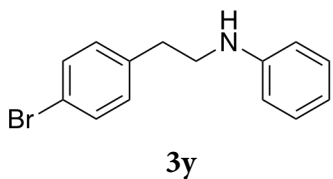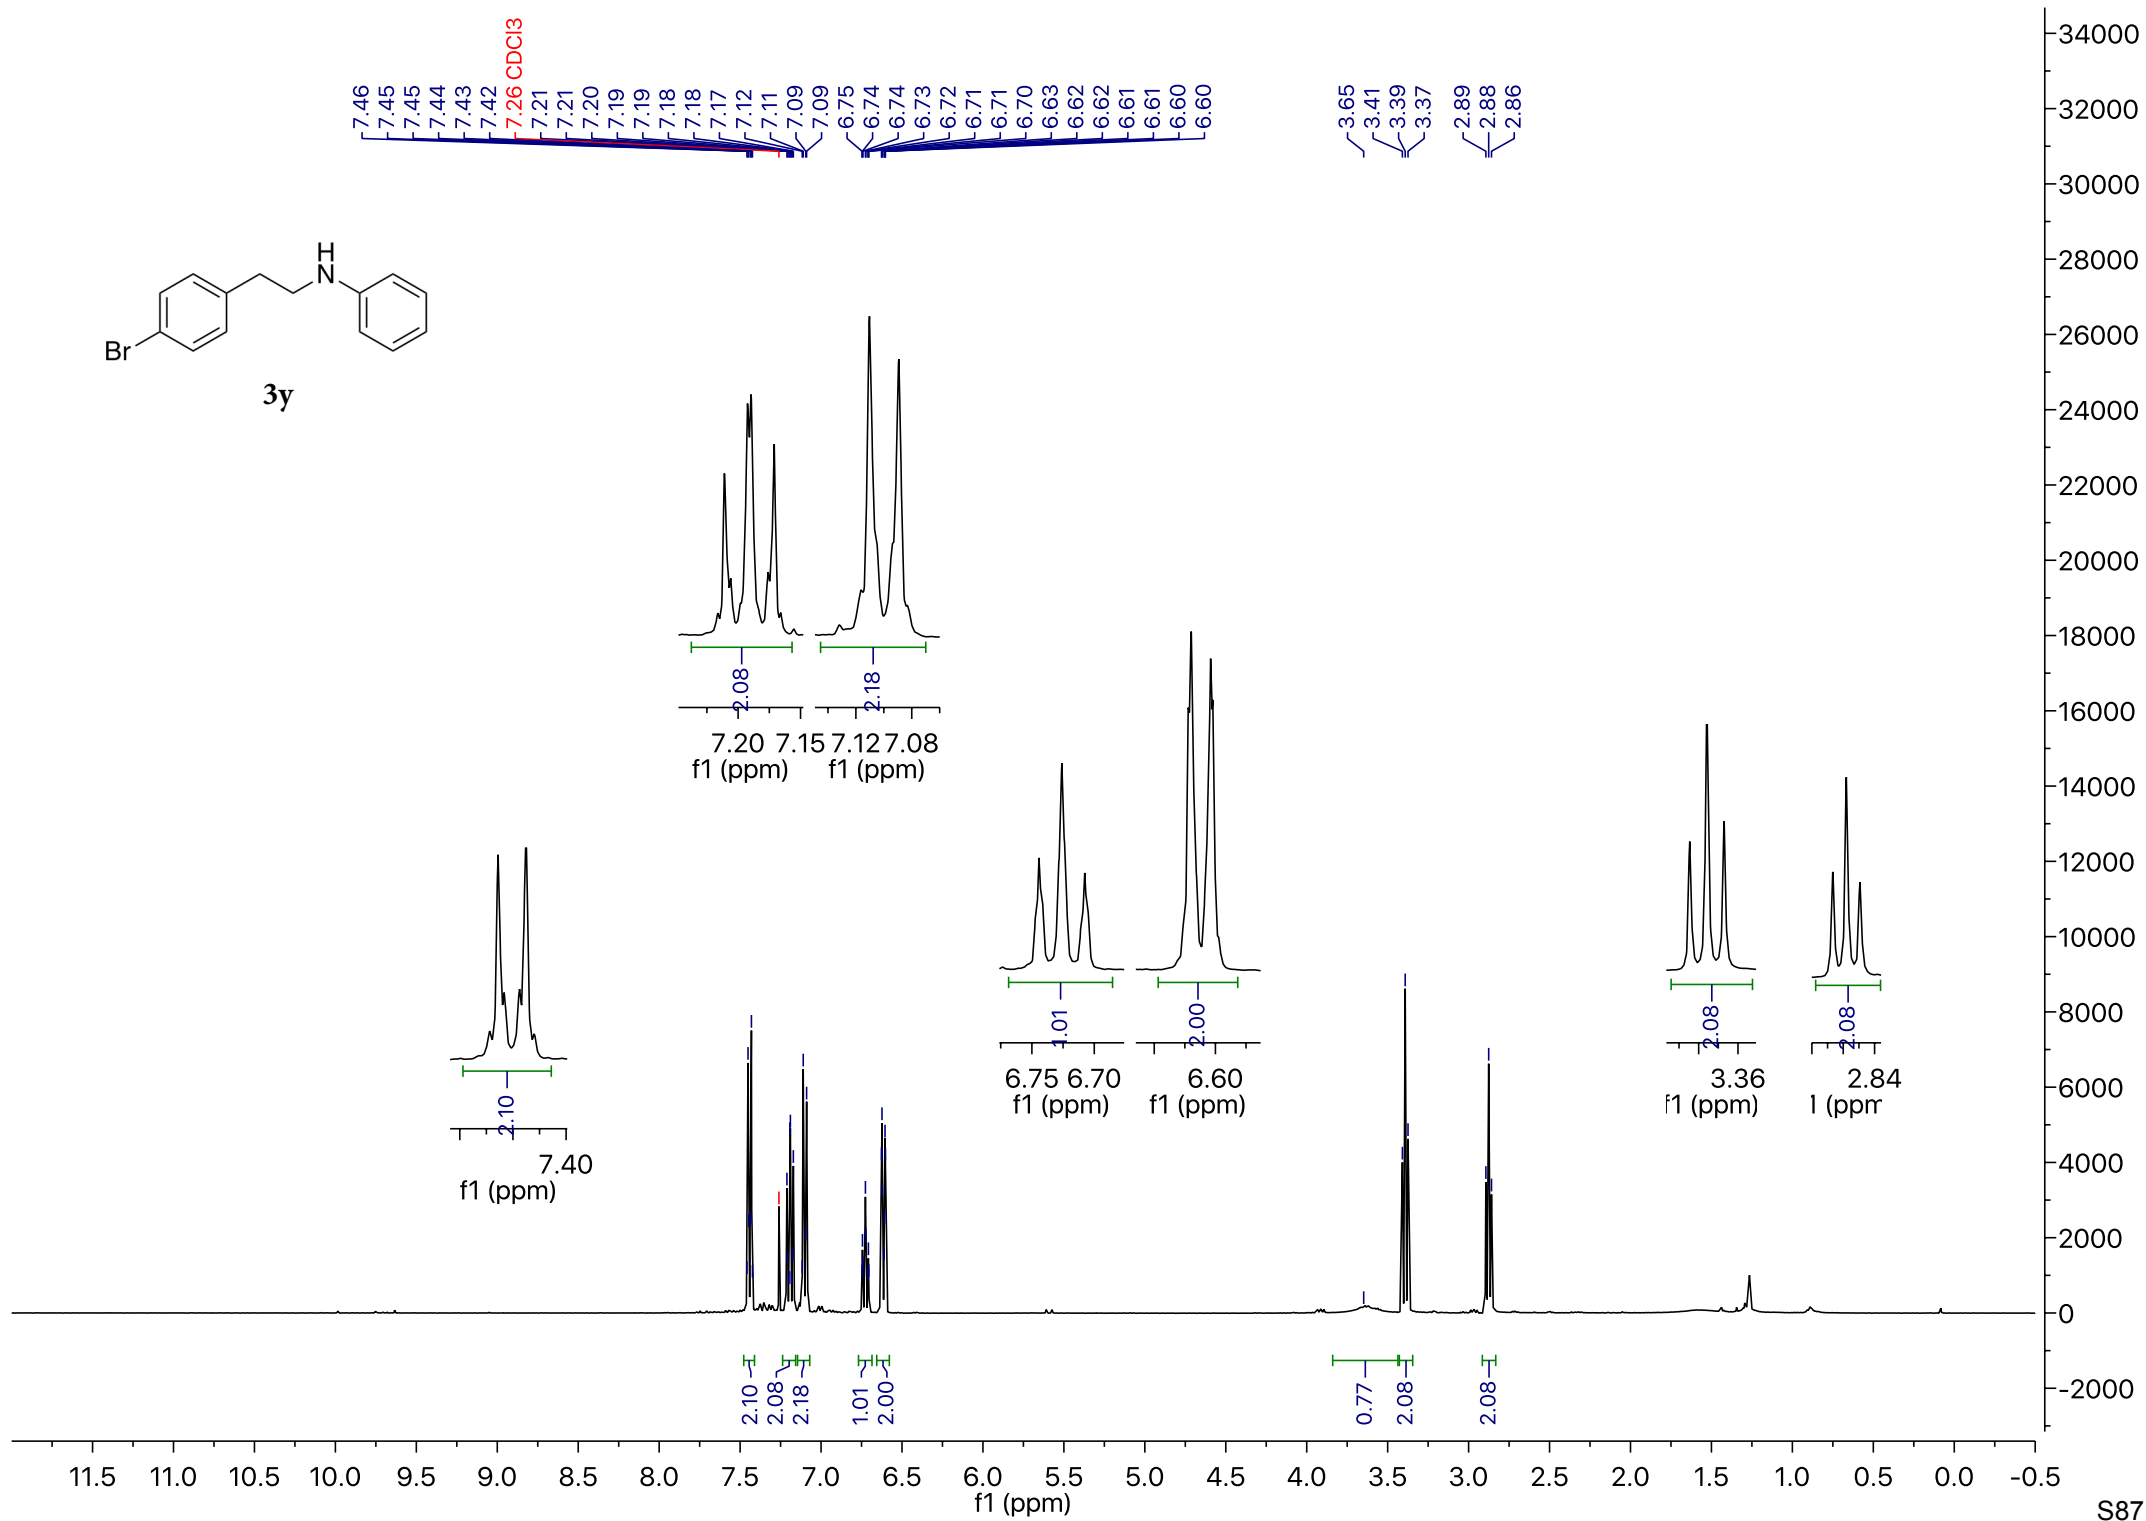

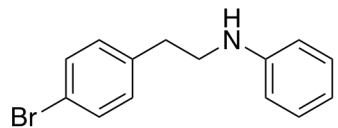

3y

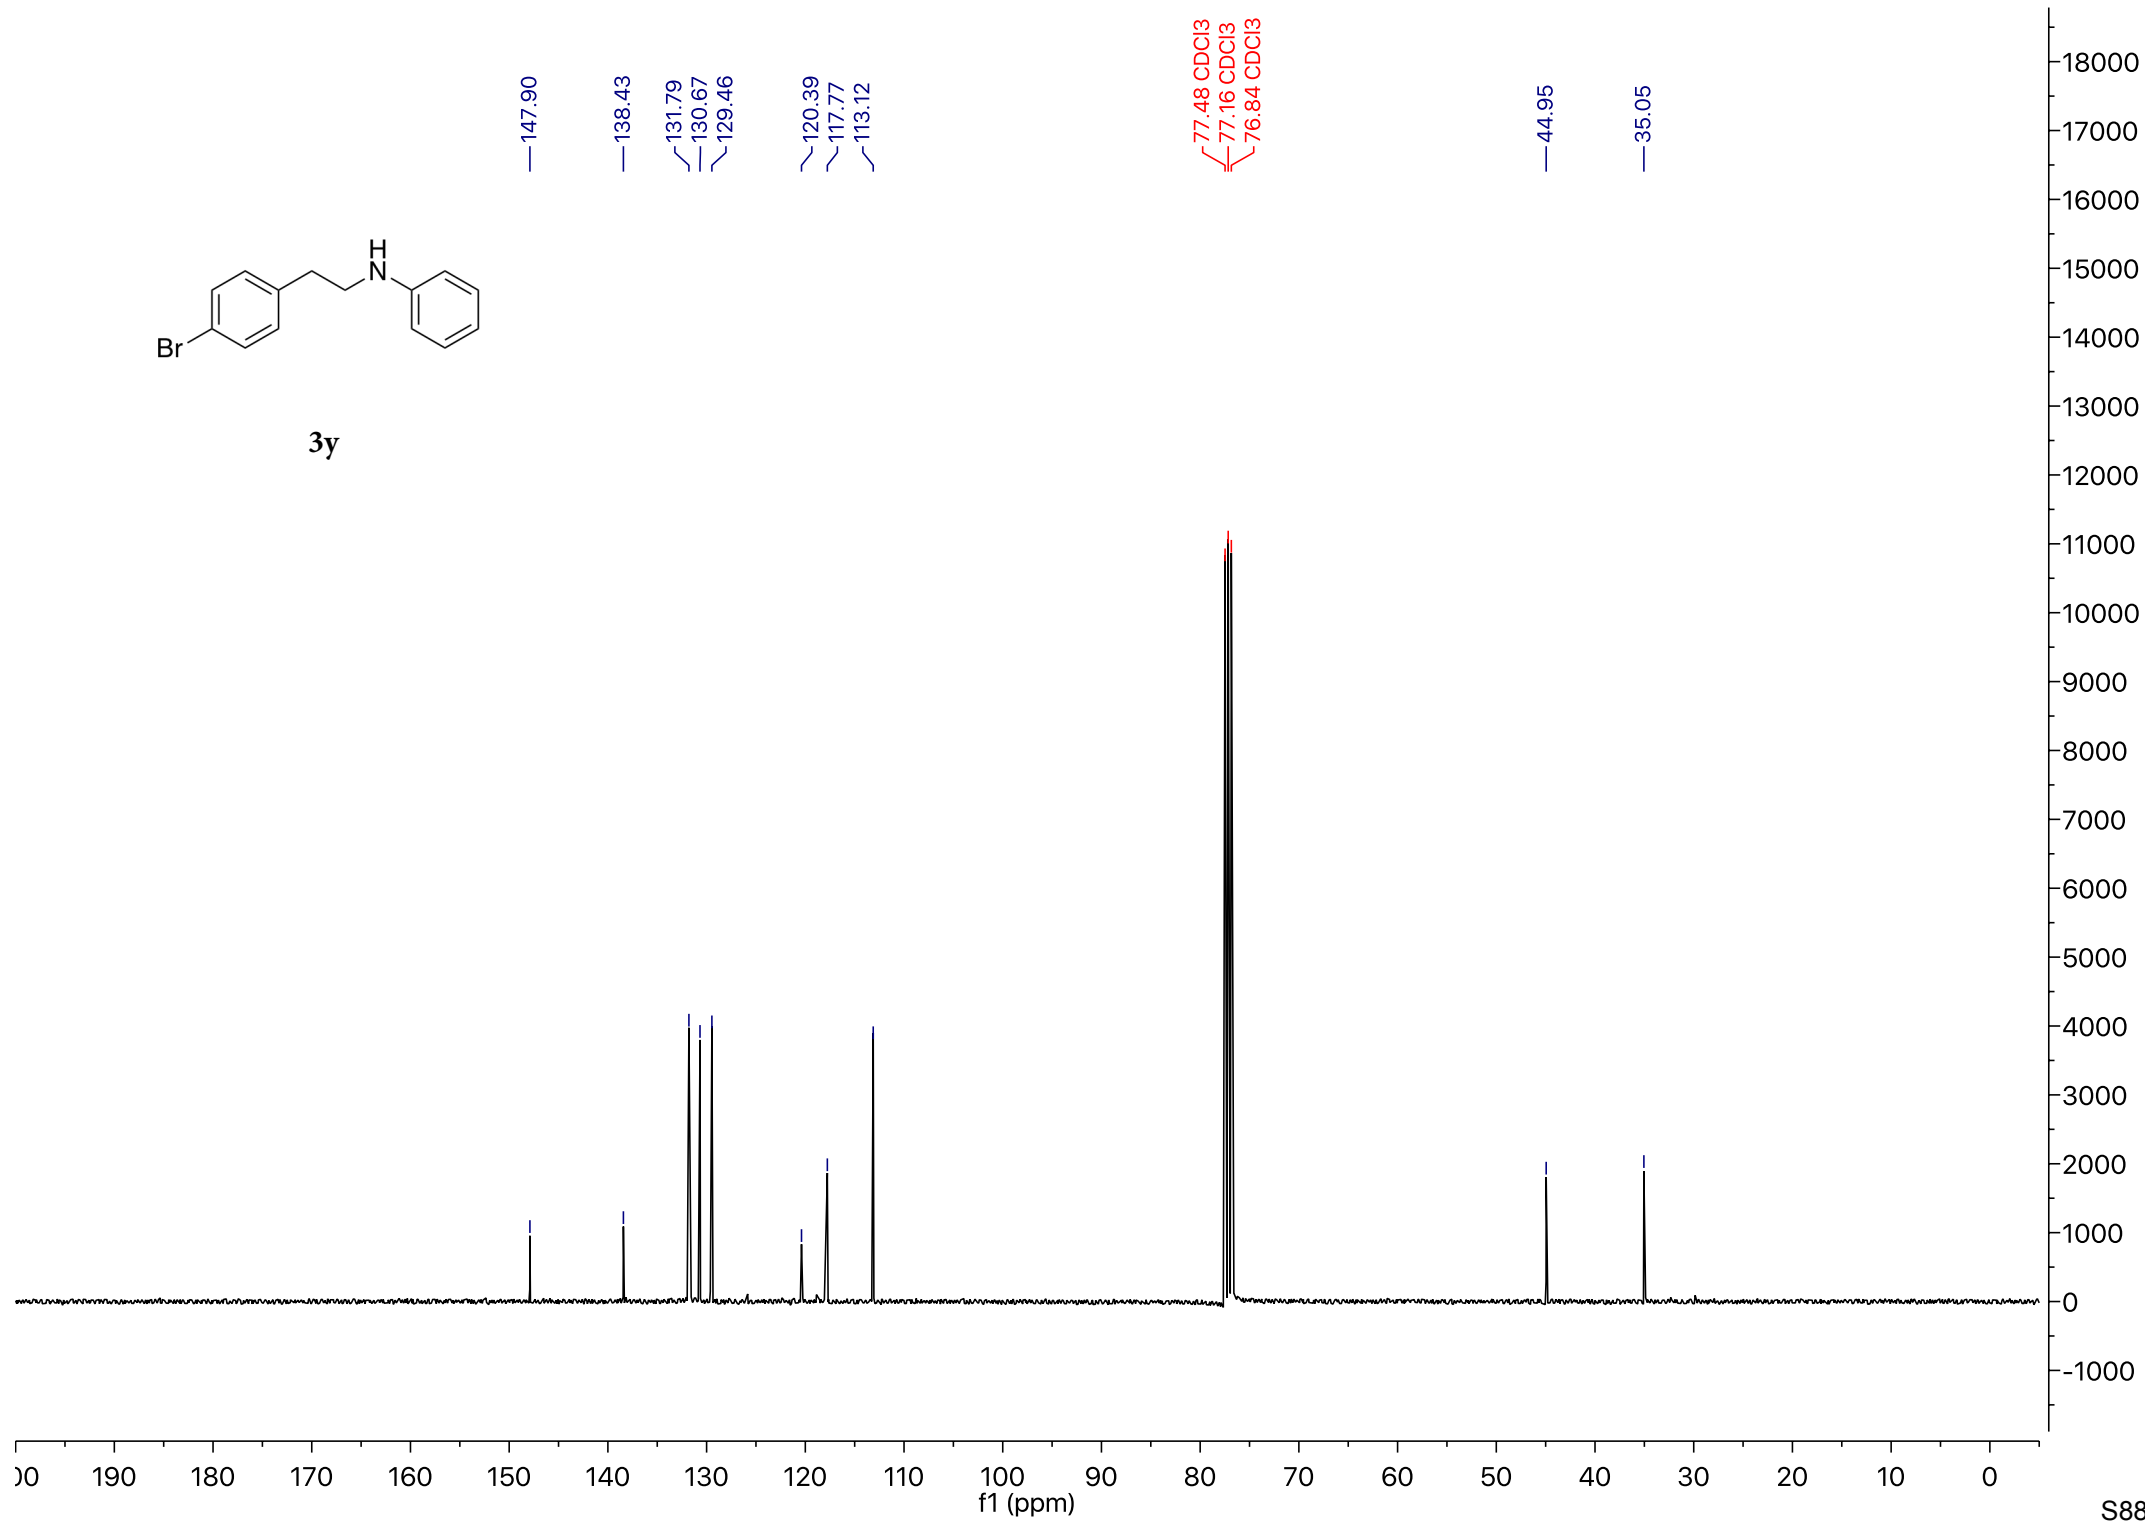

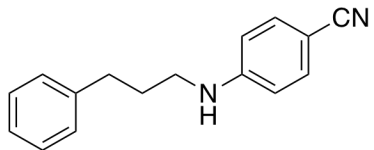

3z

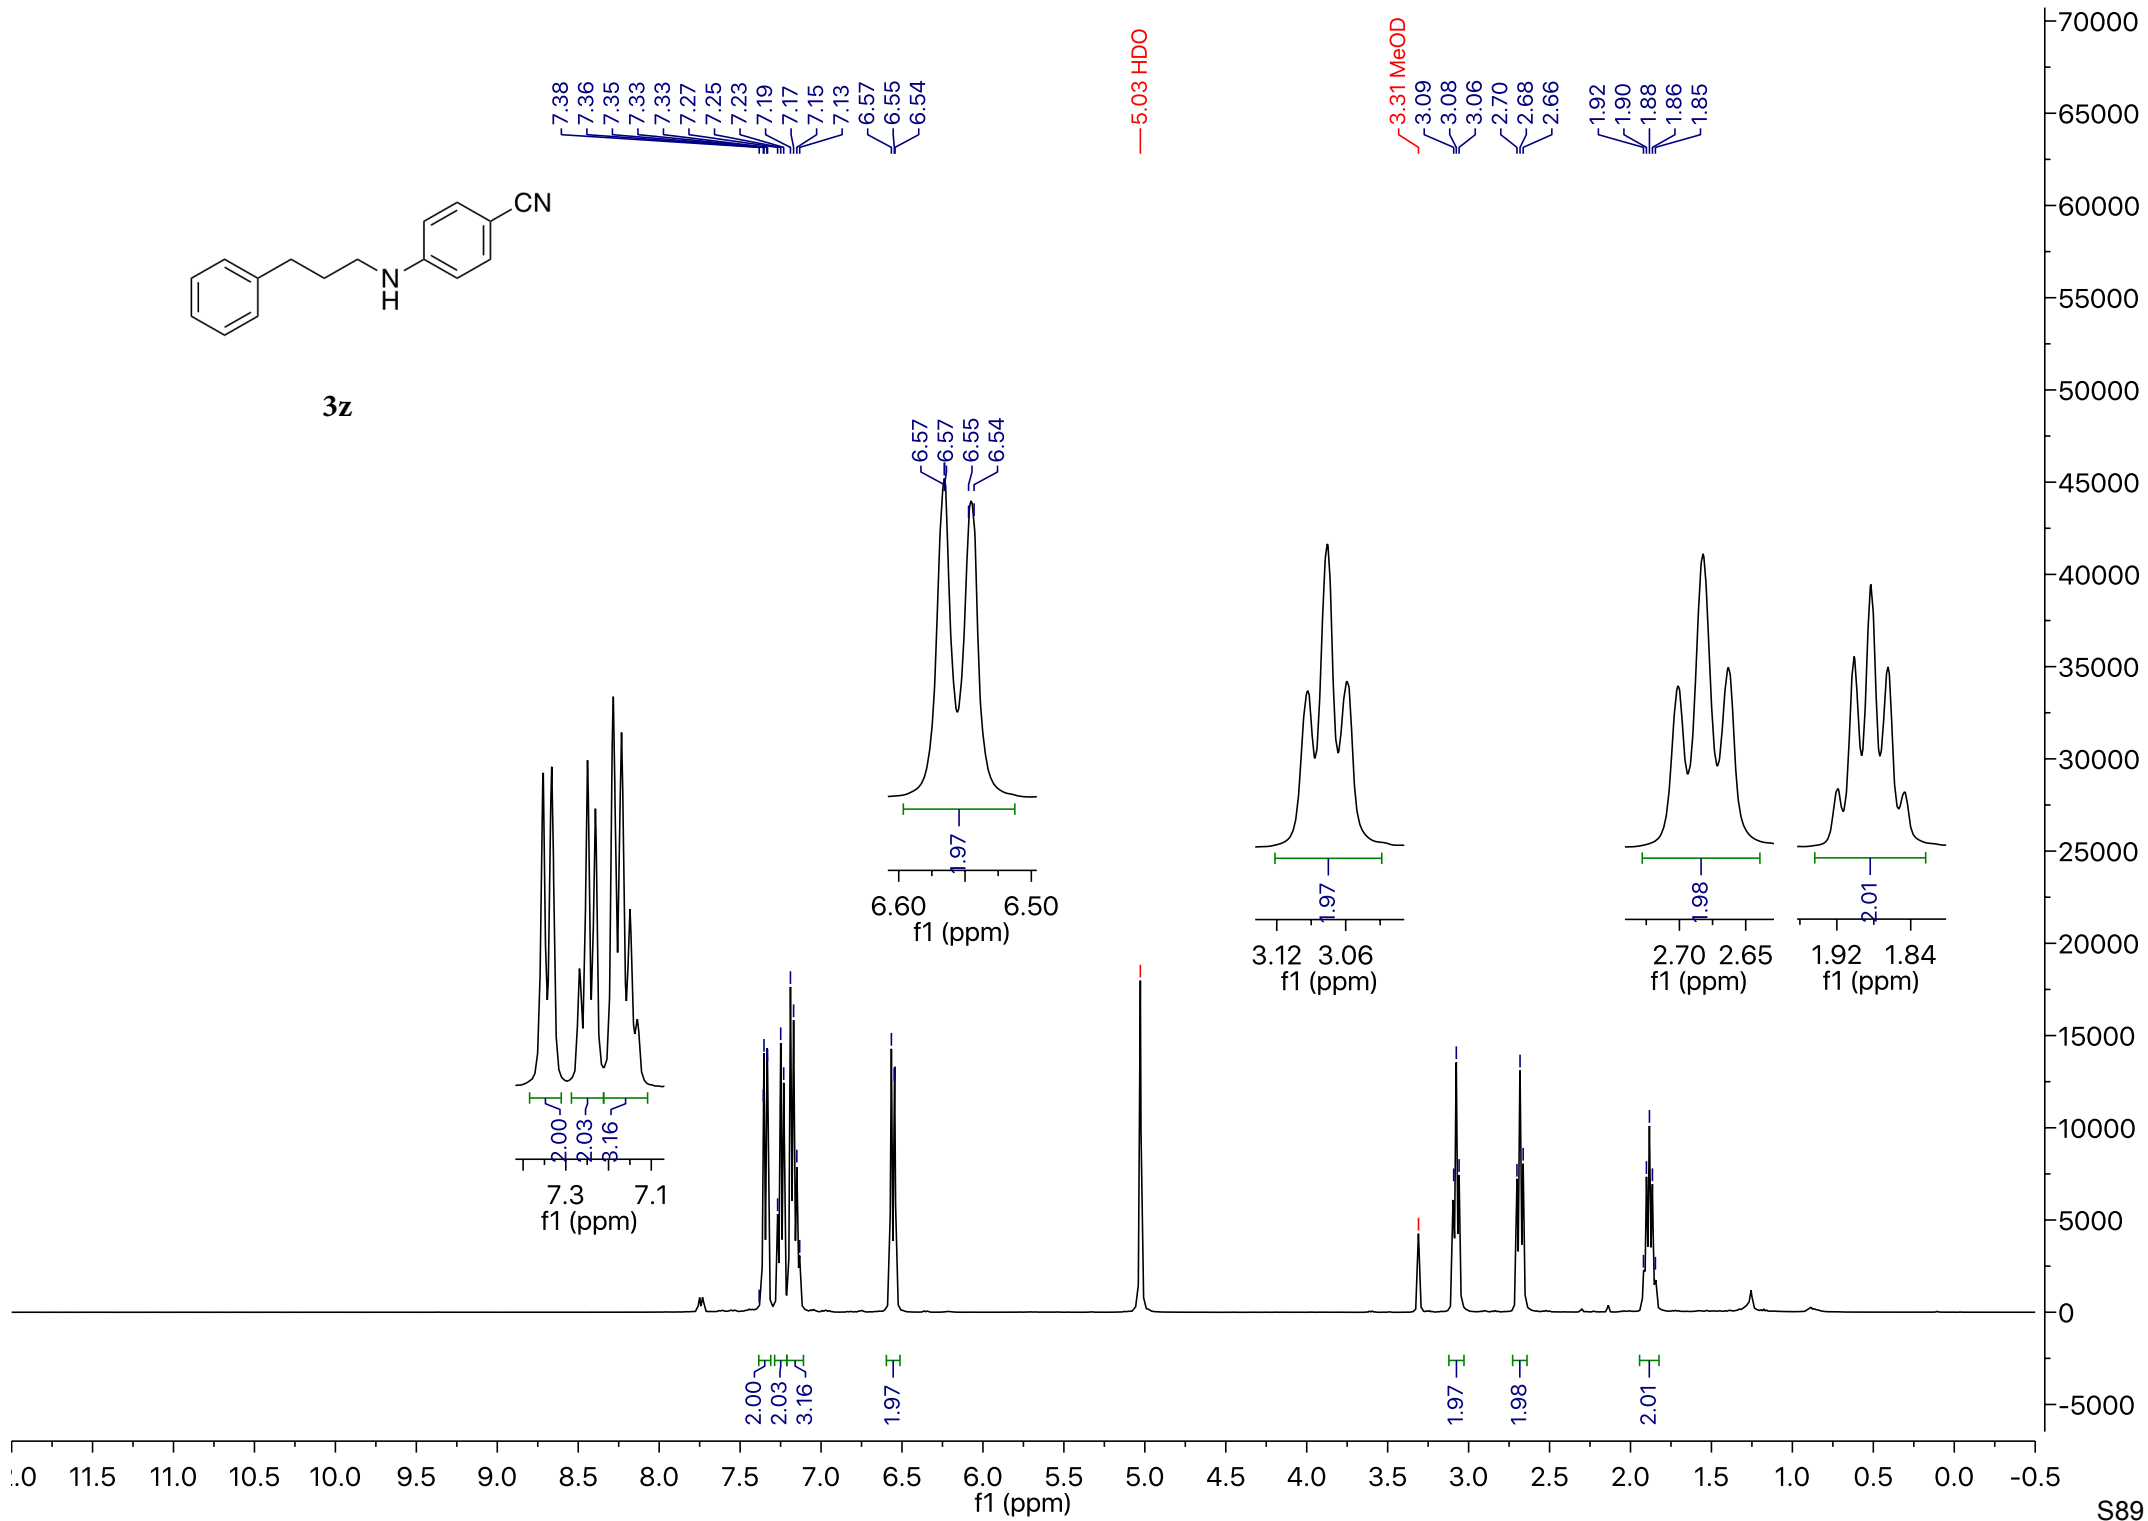

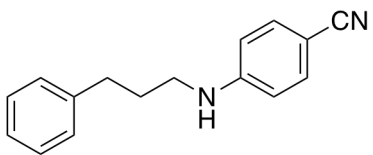

**3z**

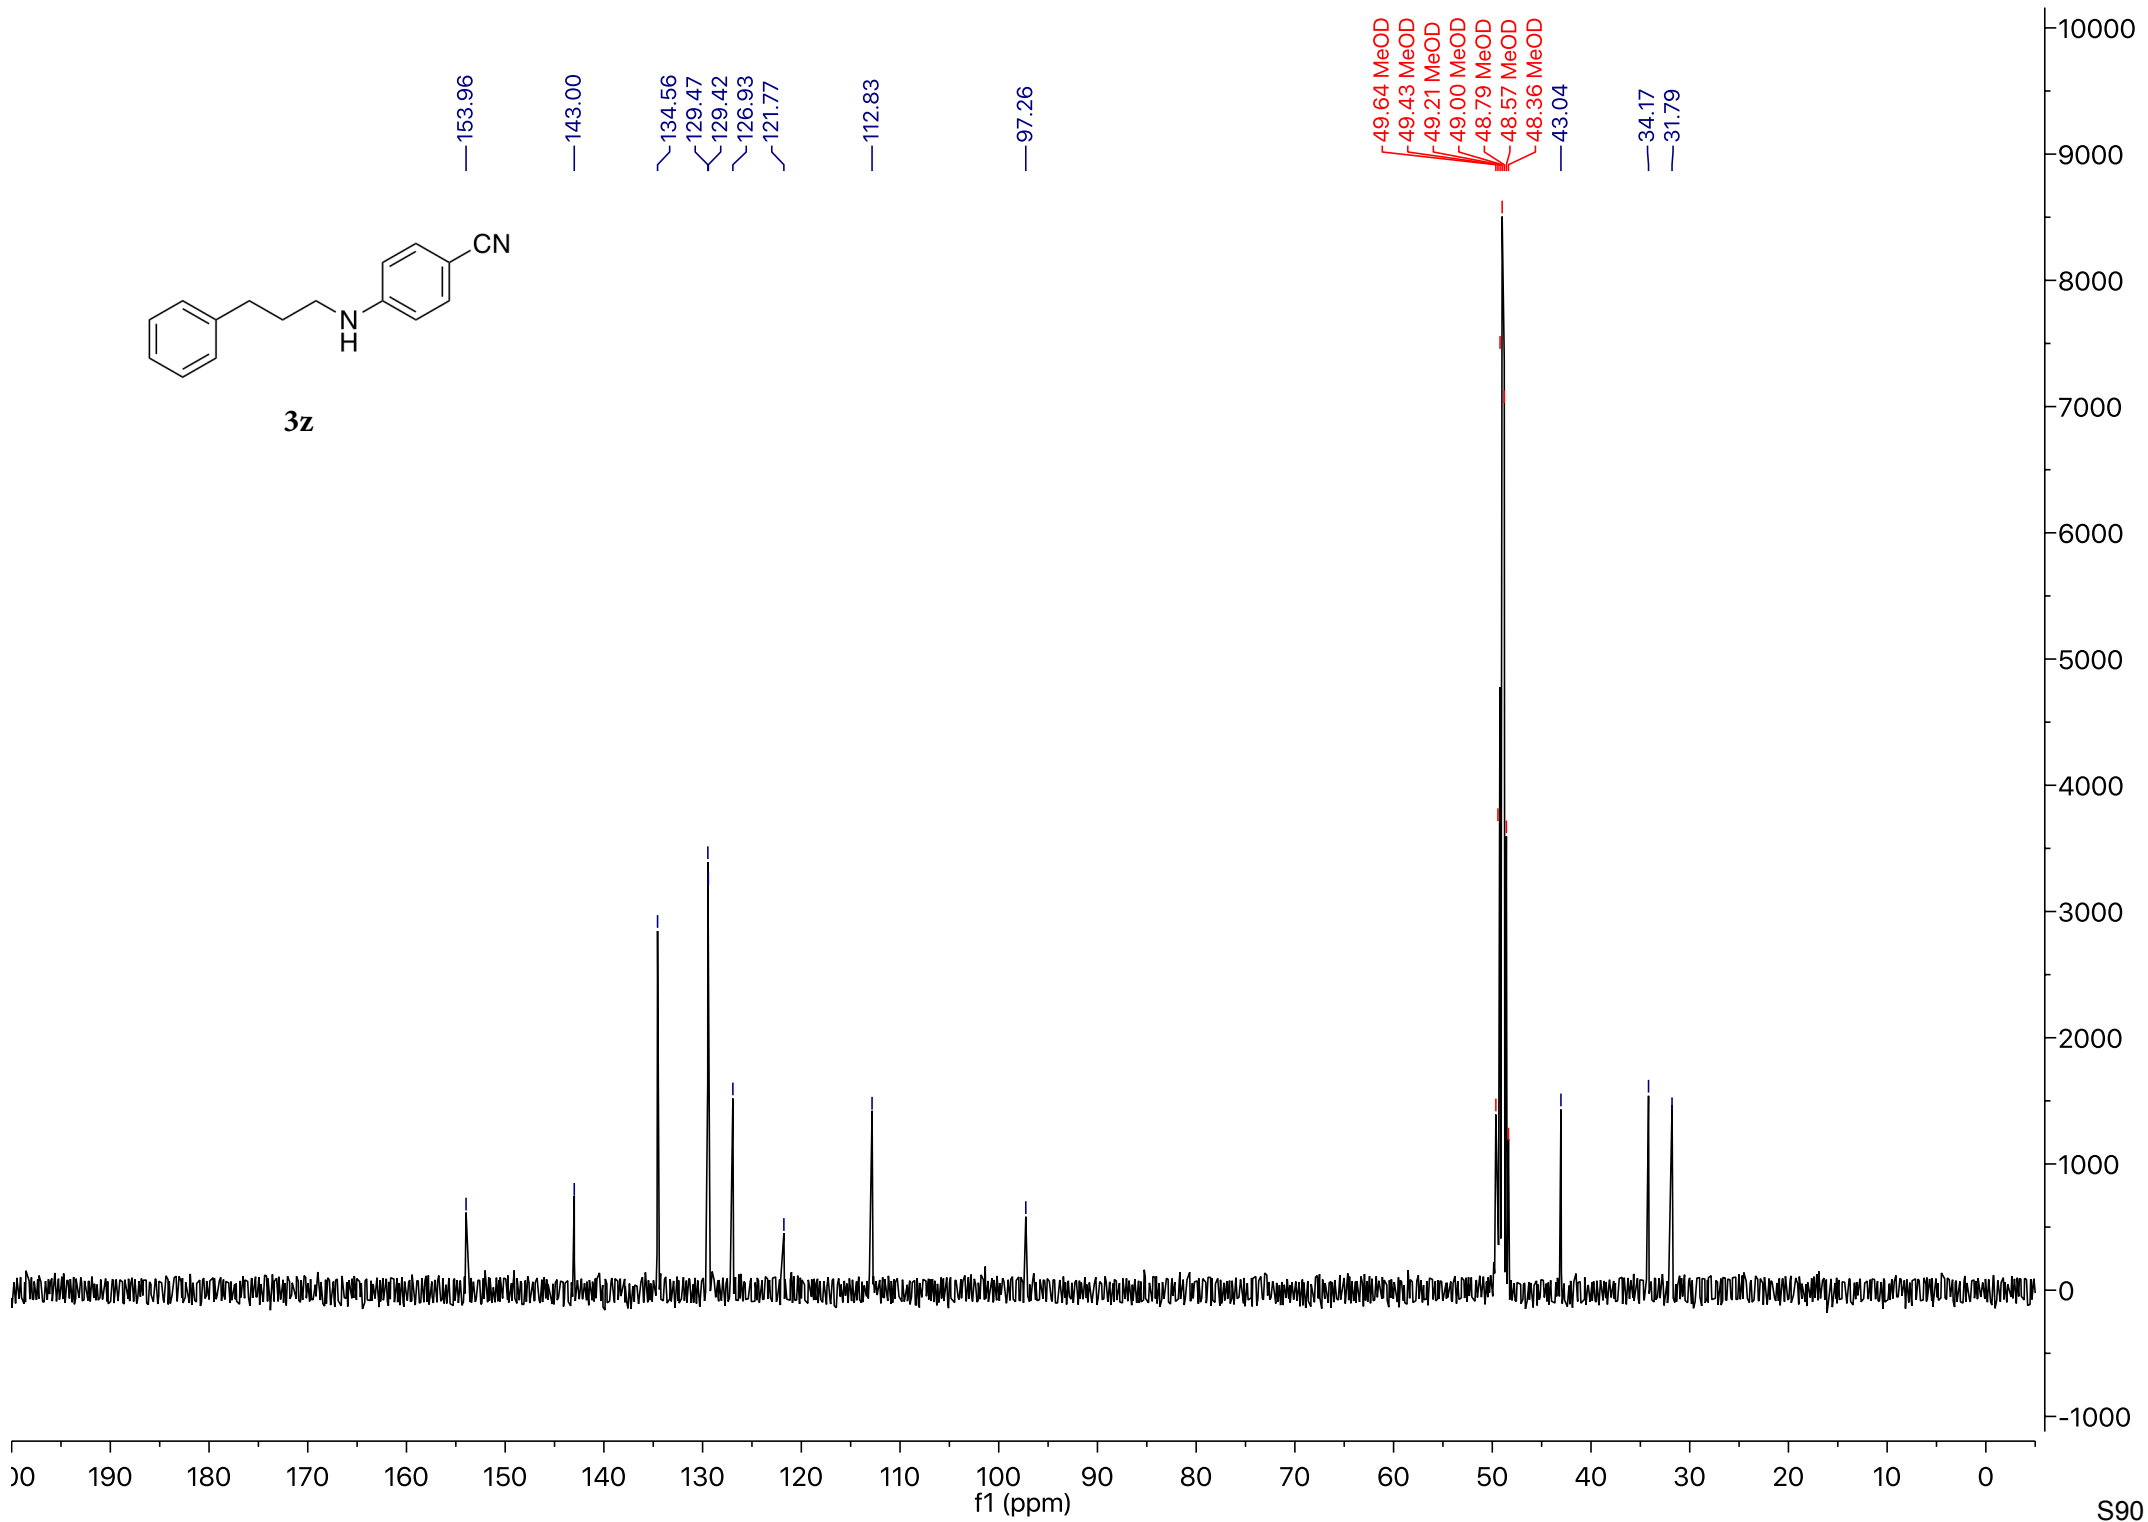

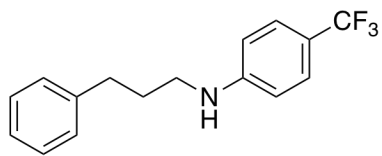

3aa

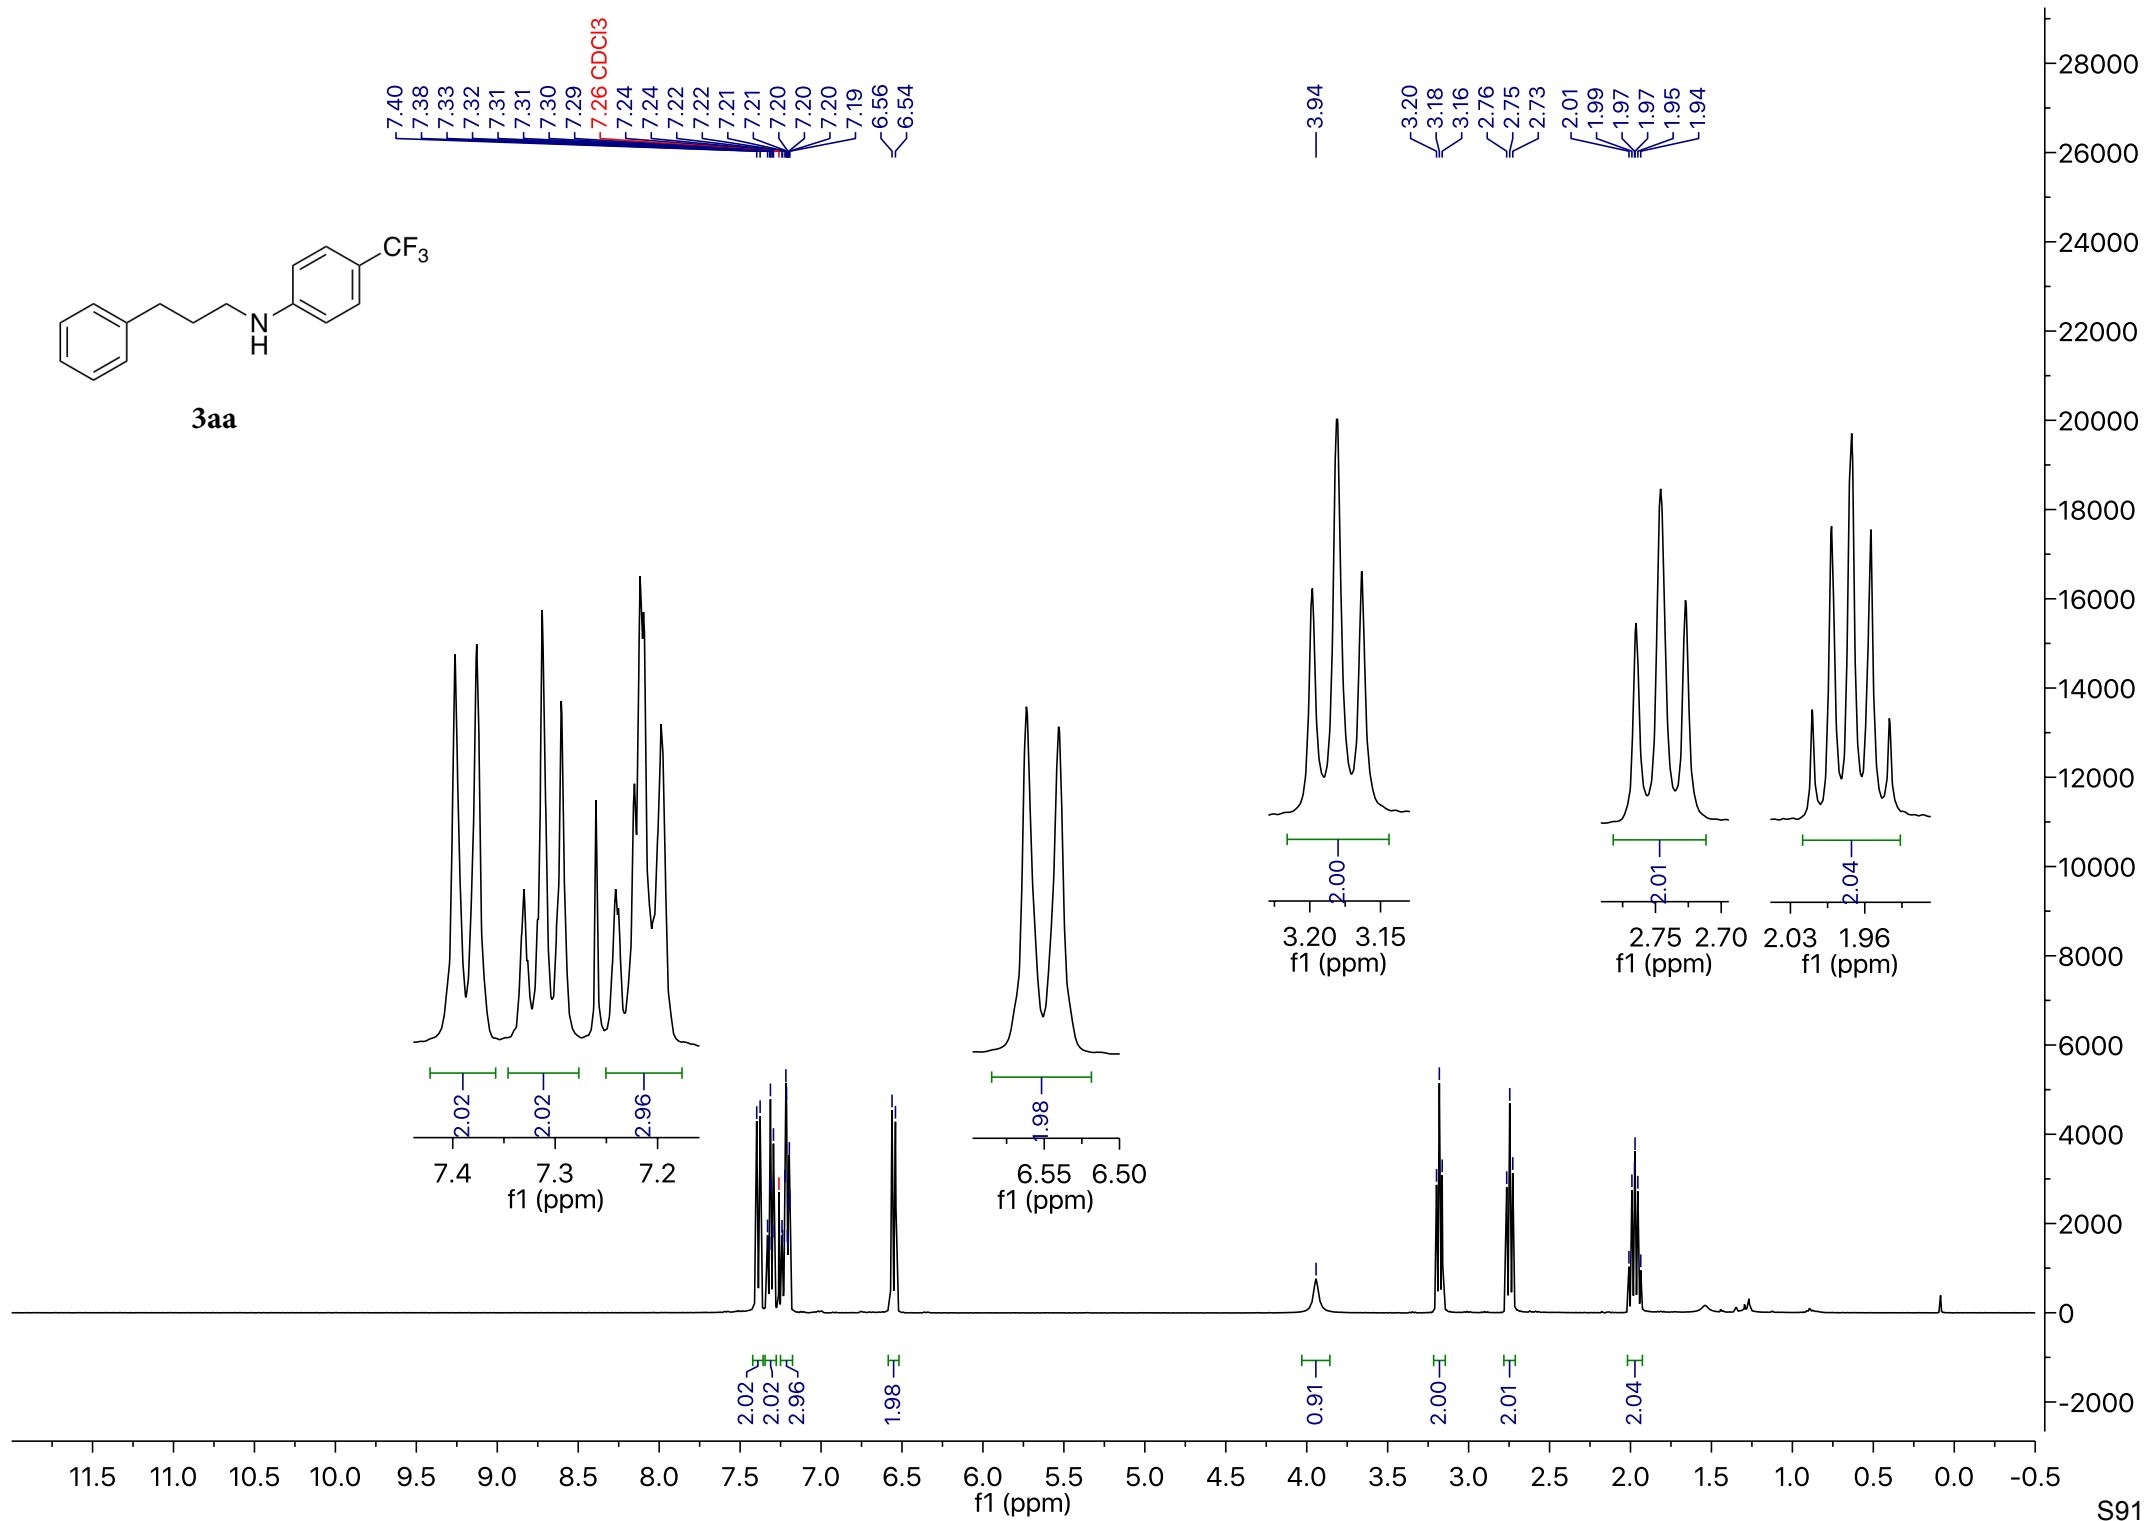



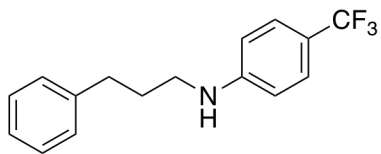

3aa

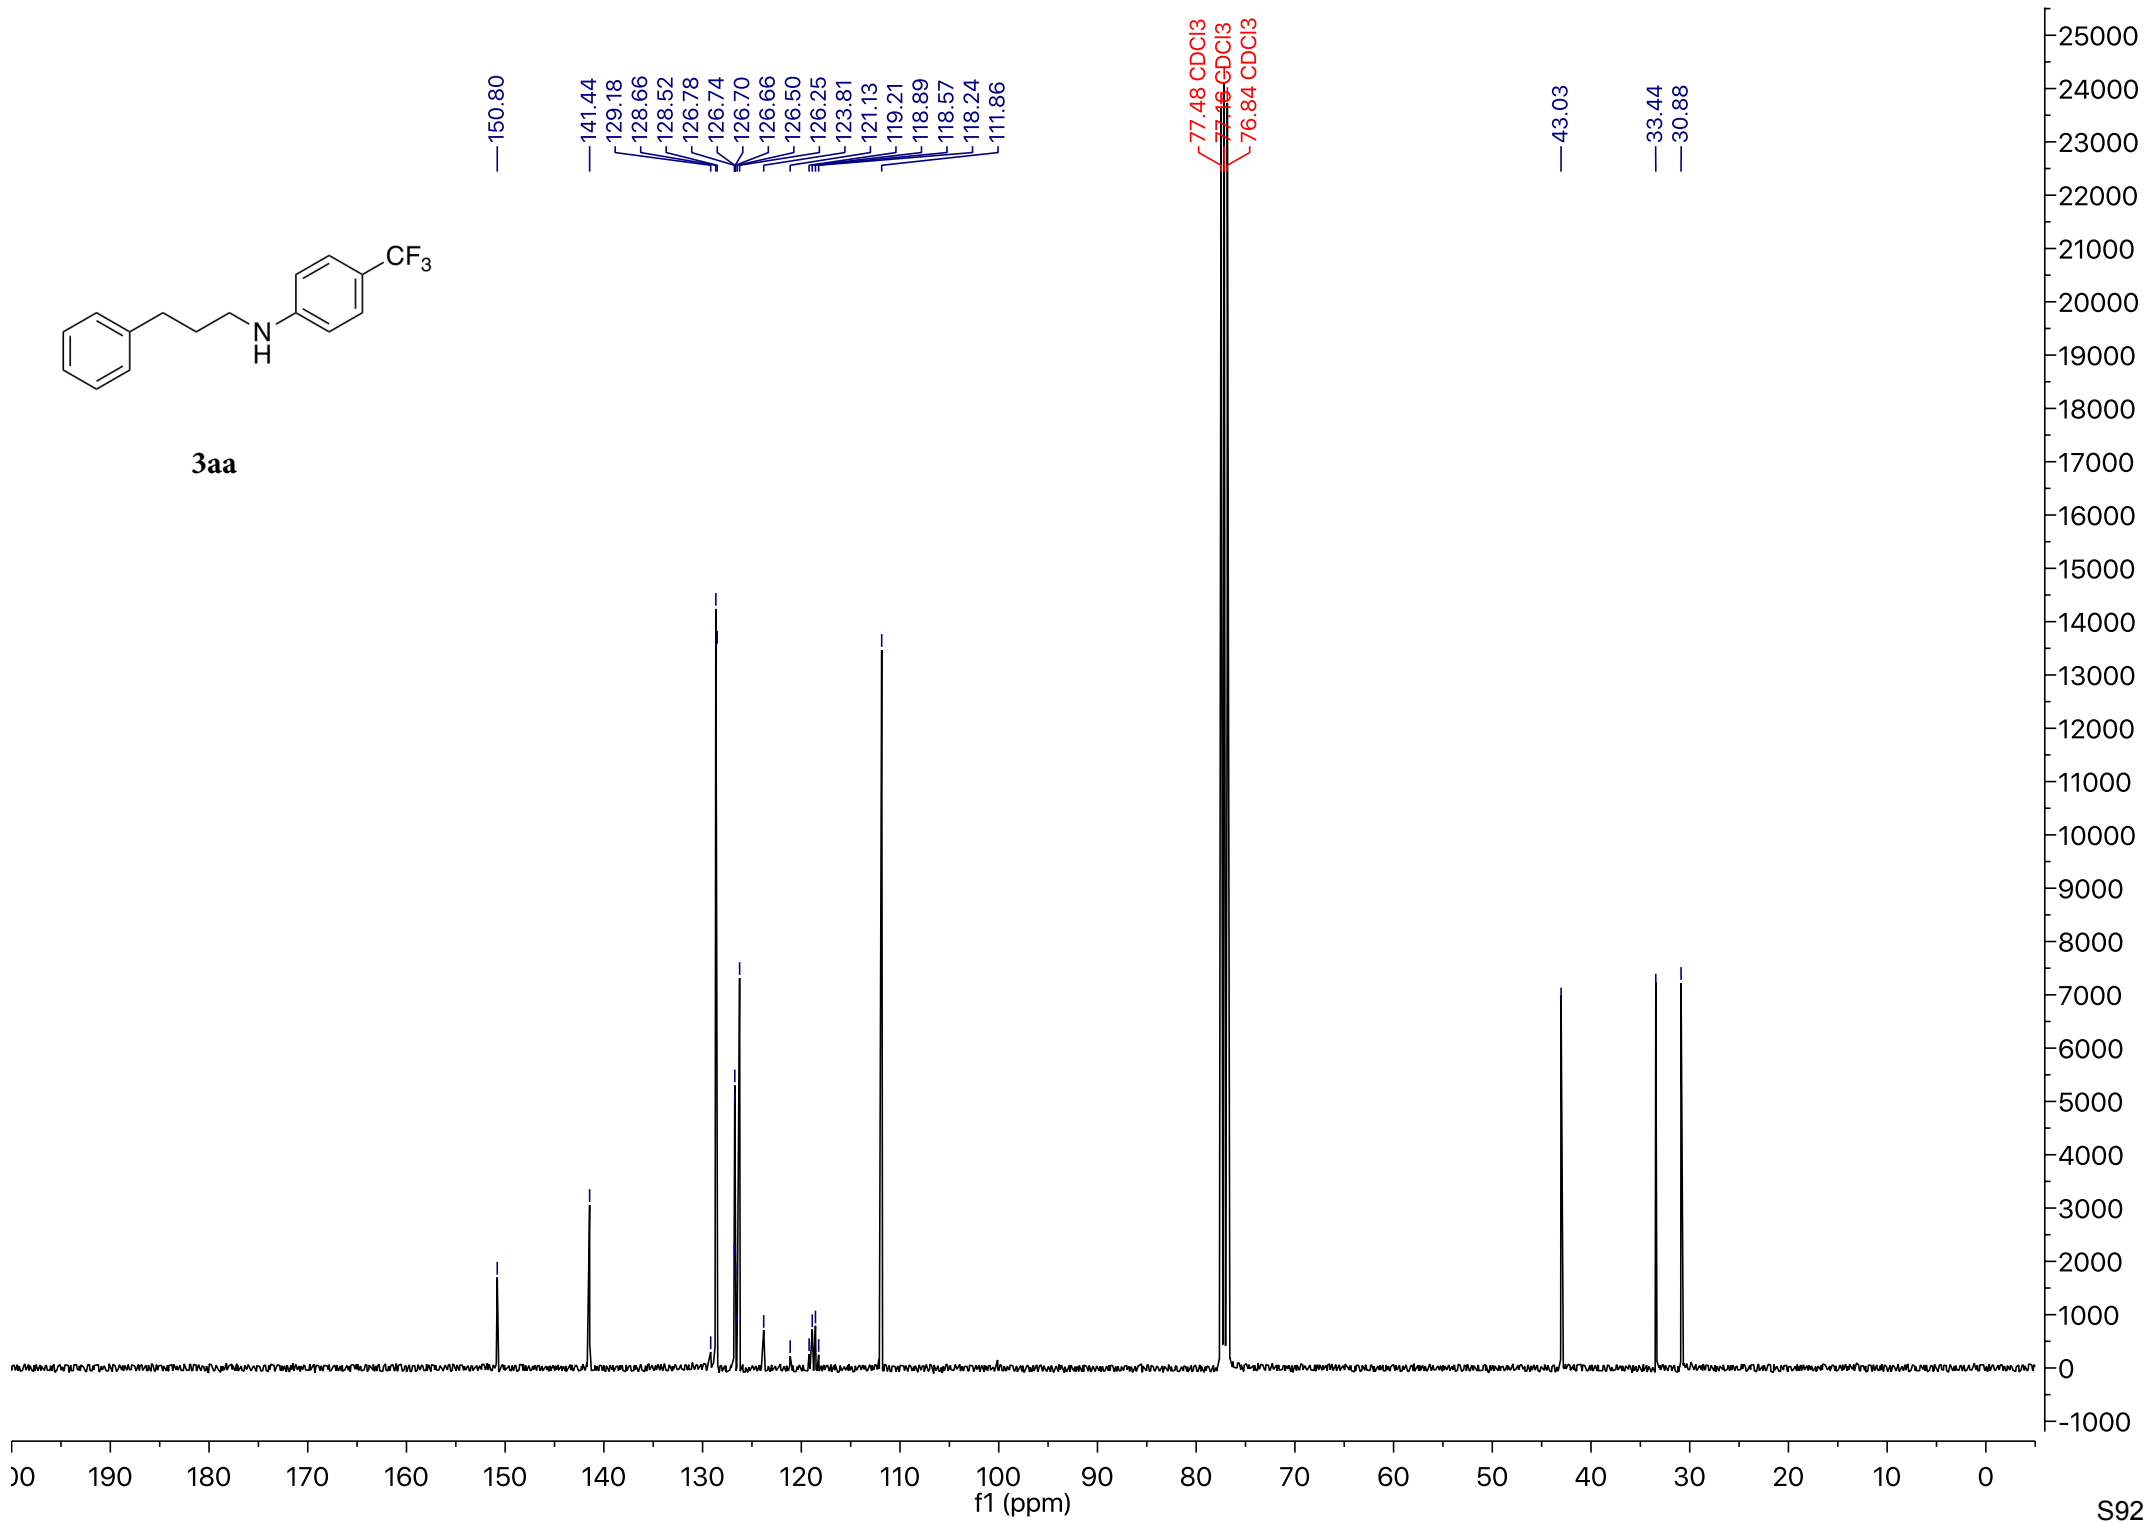

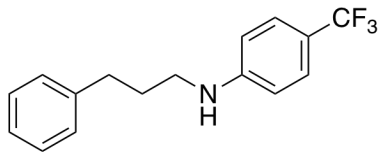

**3aa**

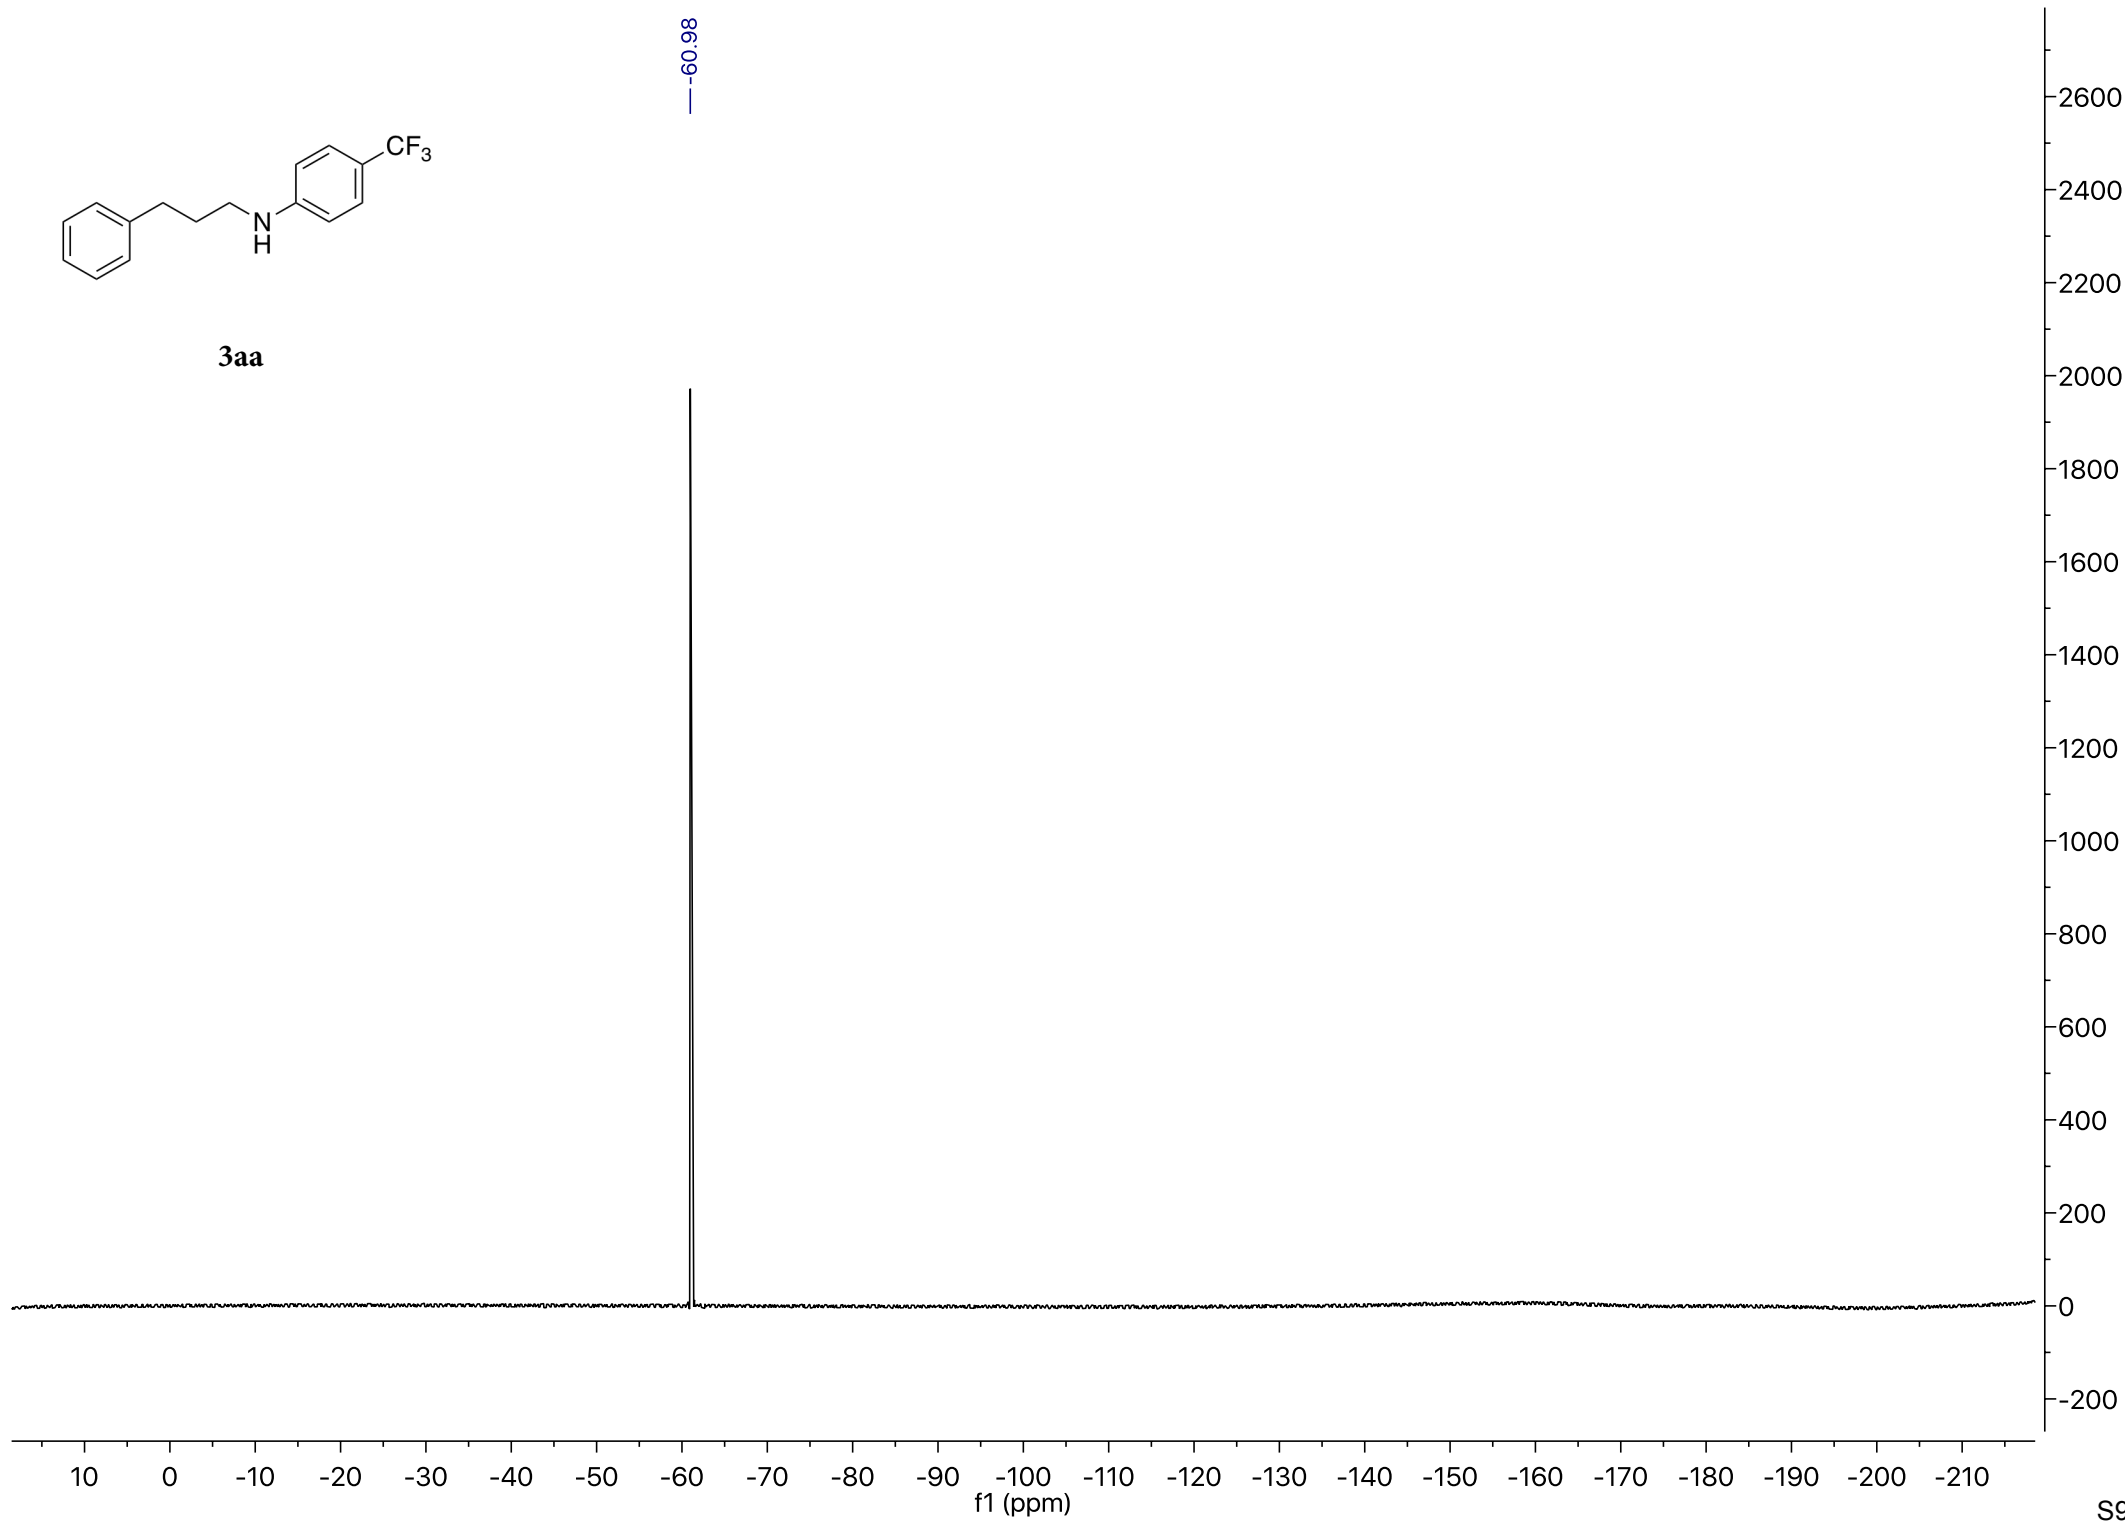

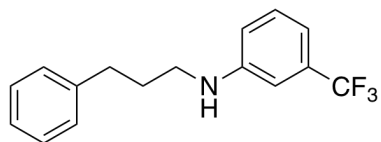

**3ab**

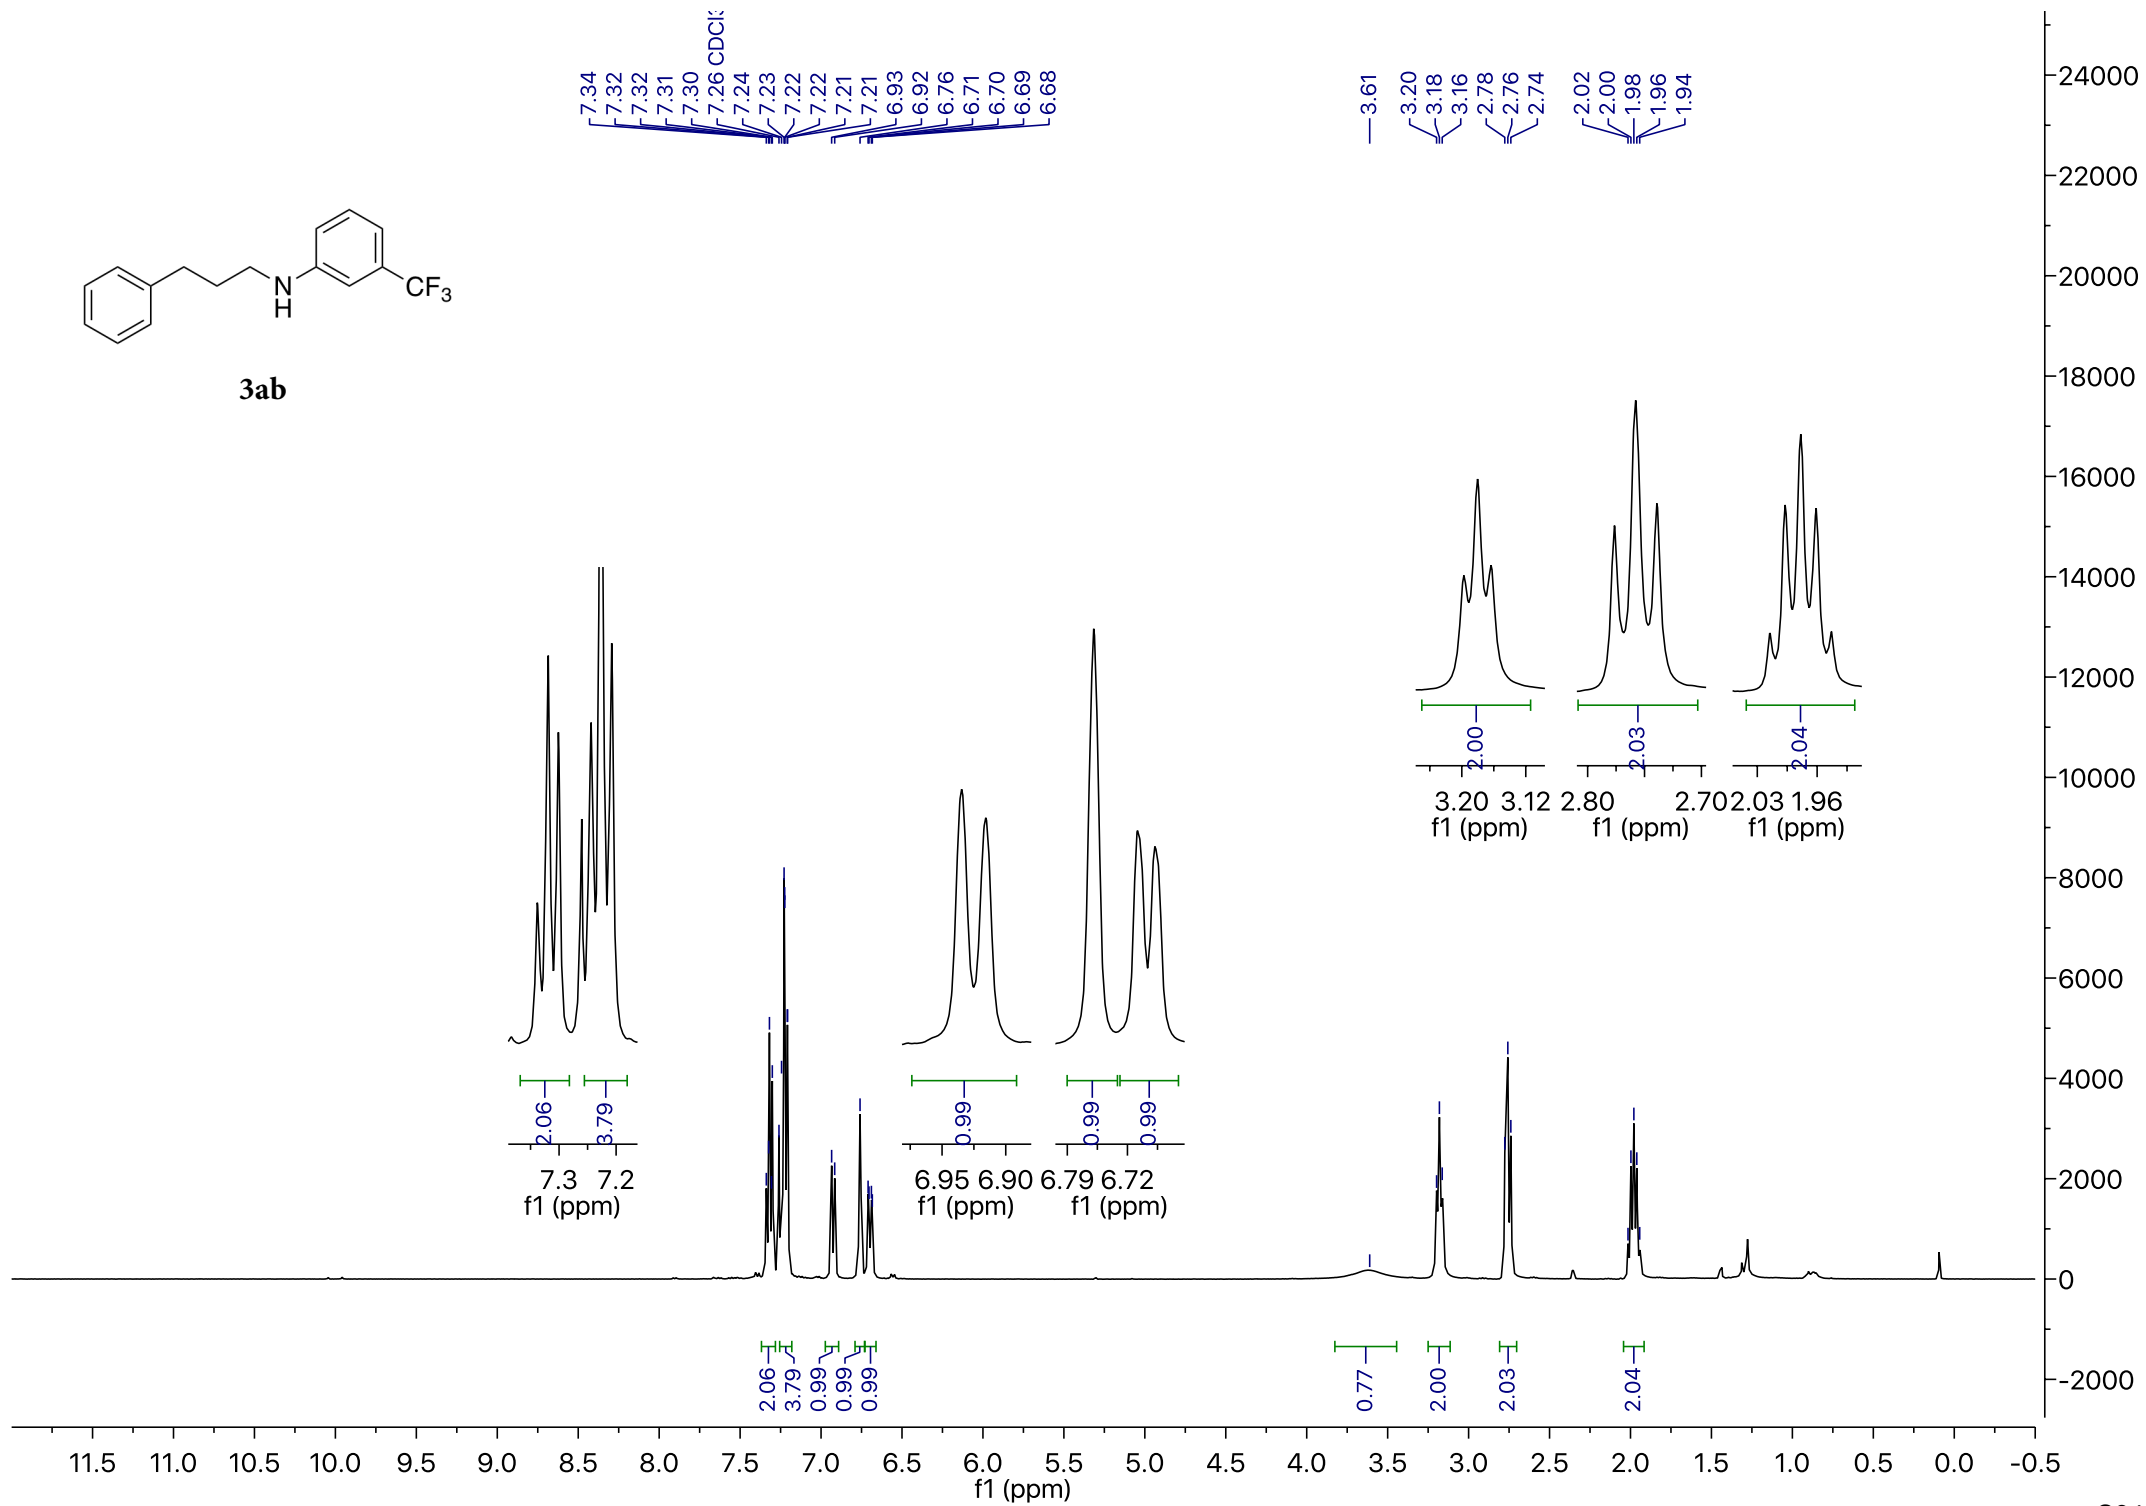

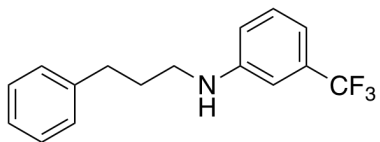

3ab

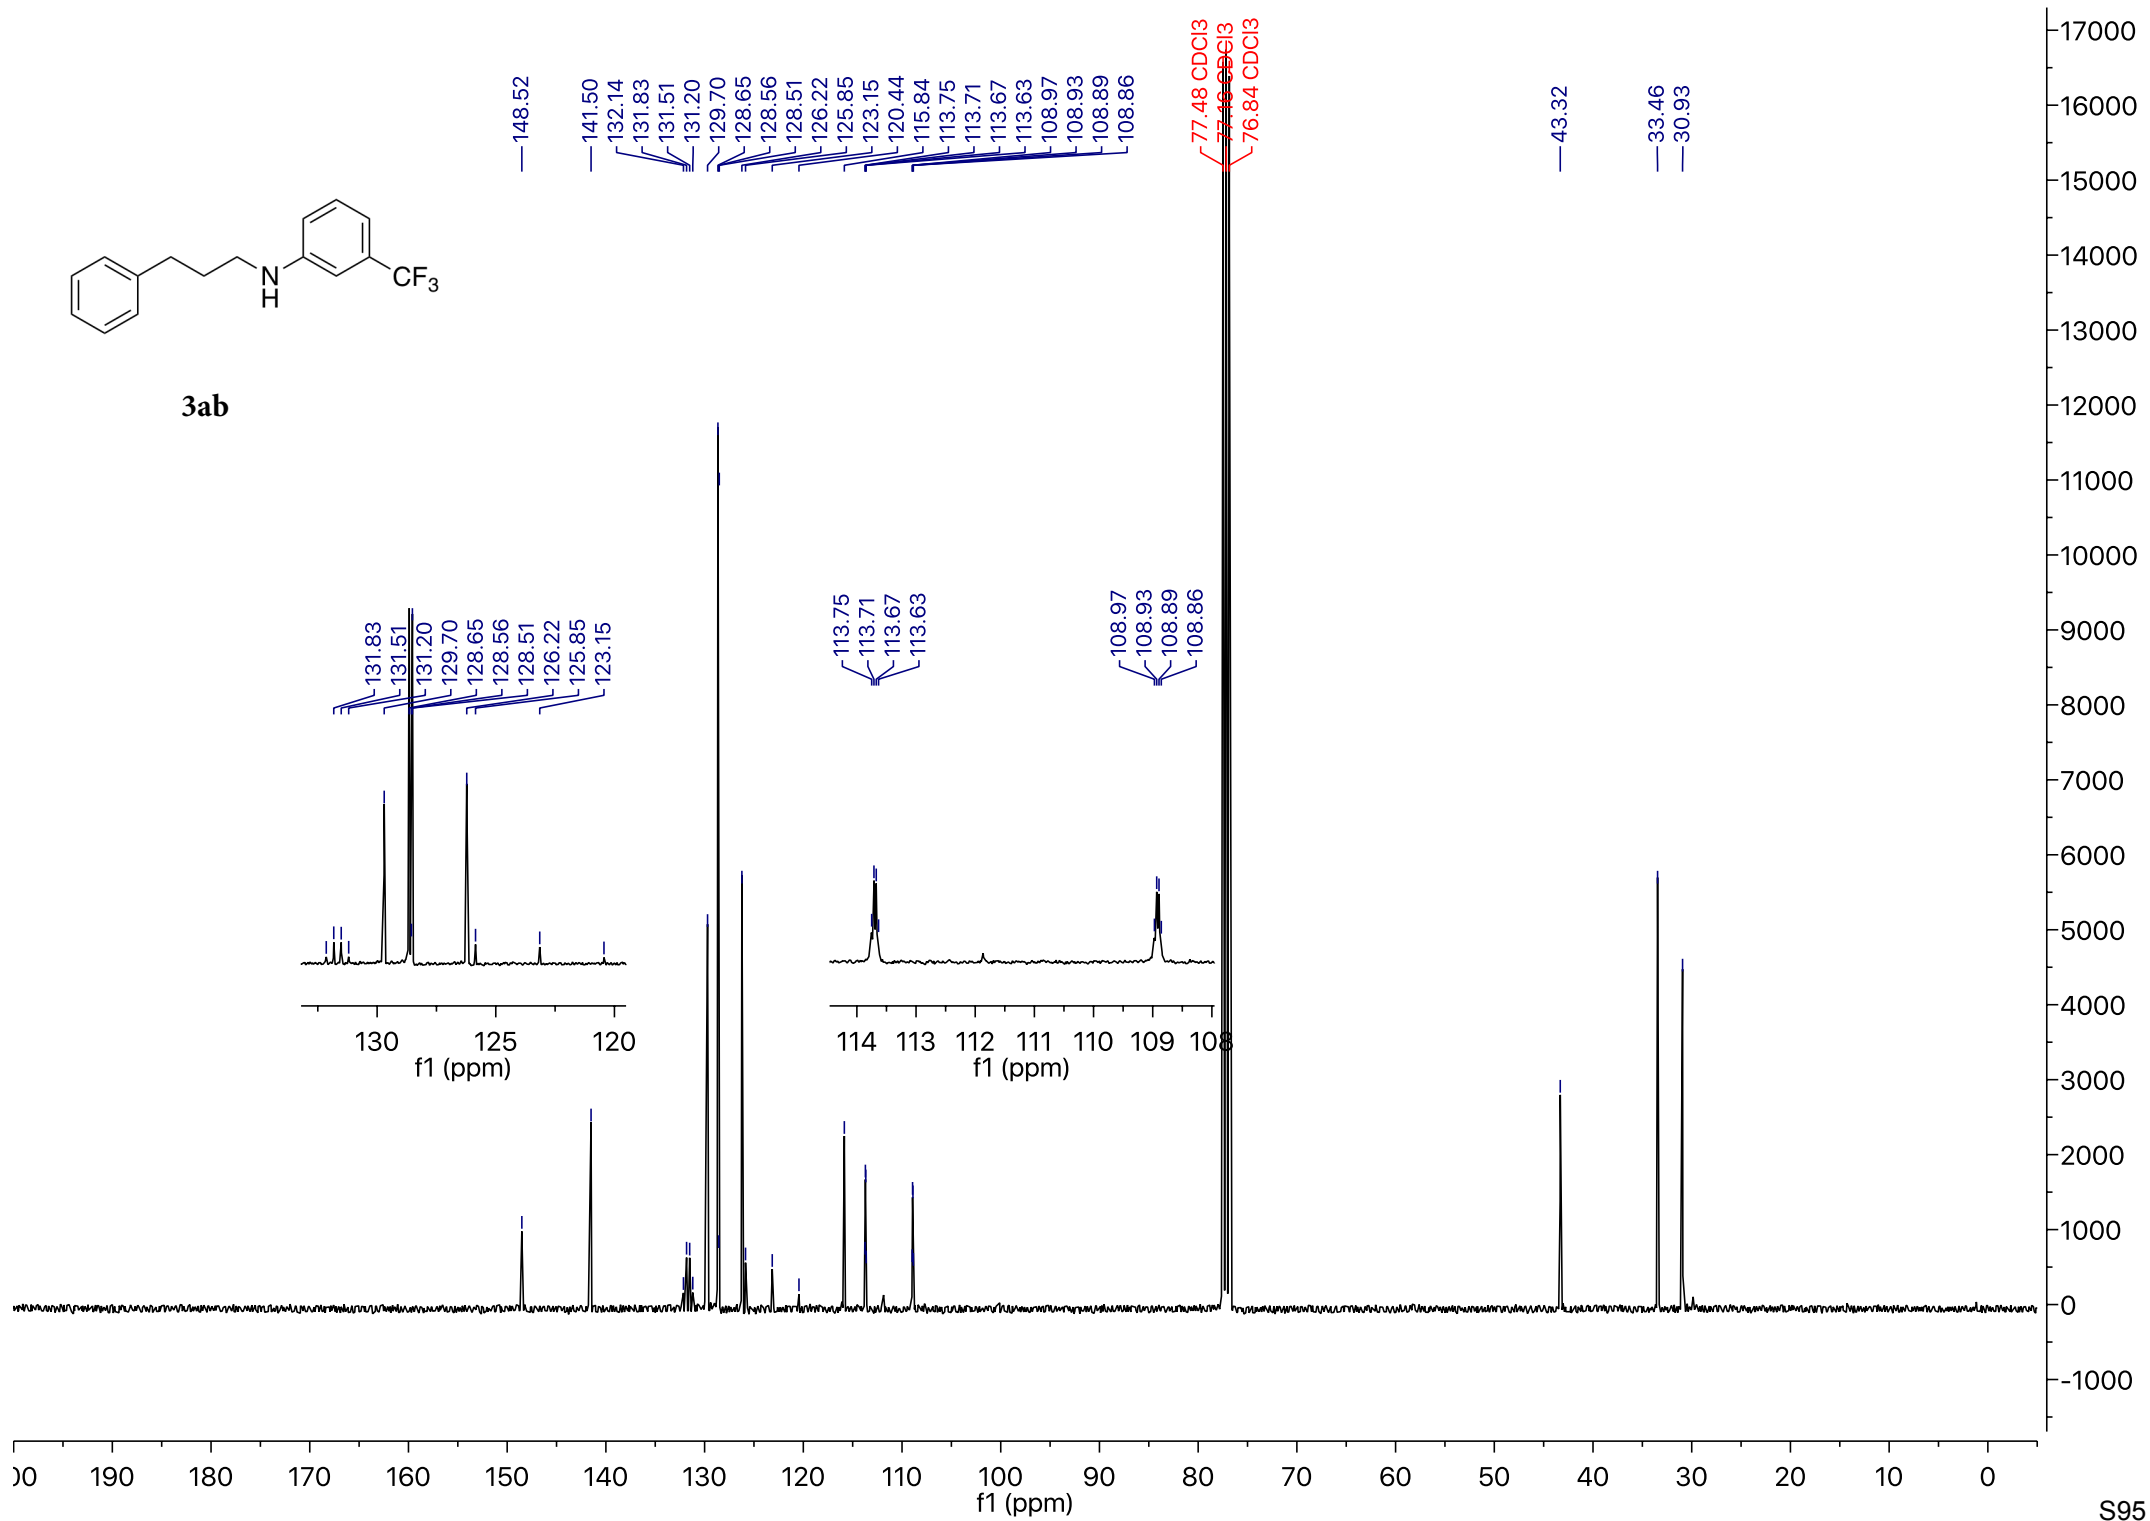

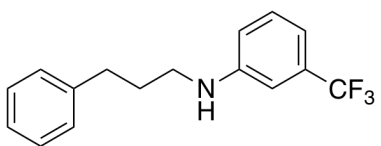

**3ab**

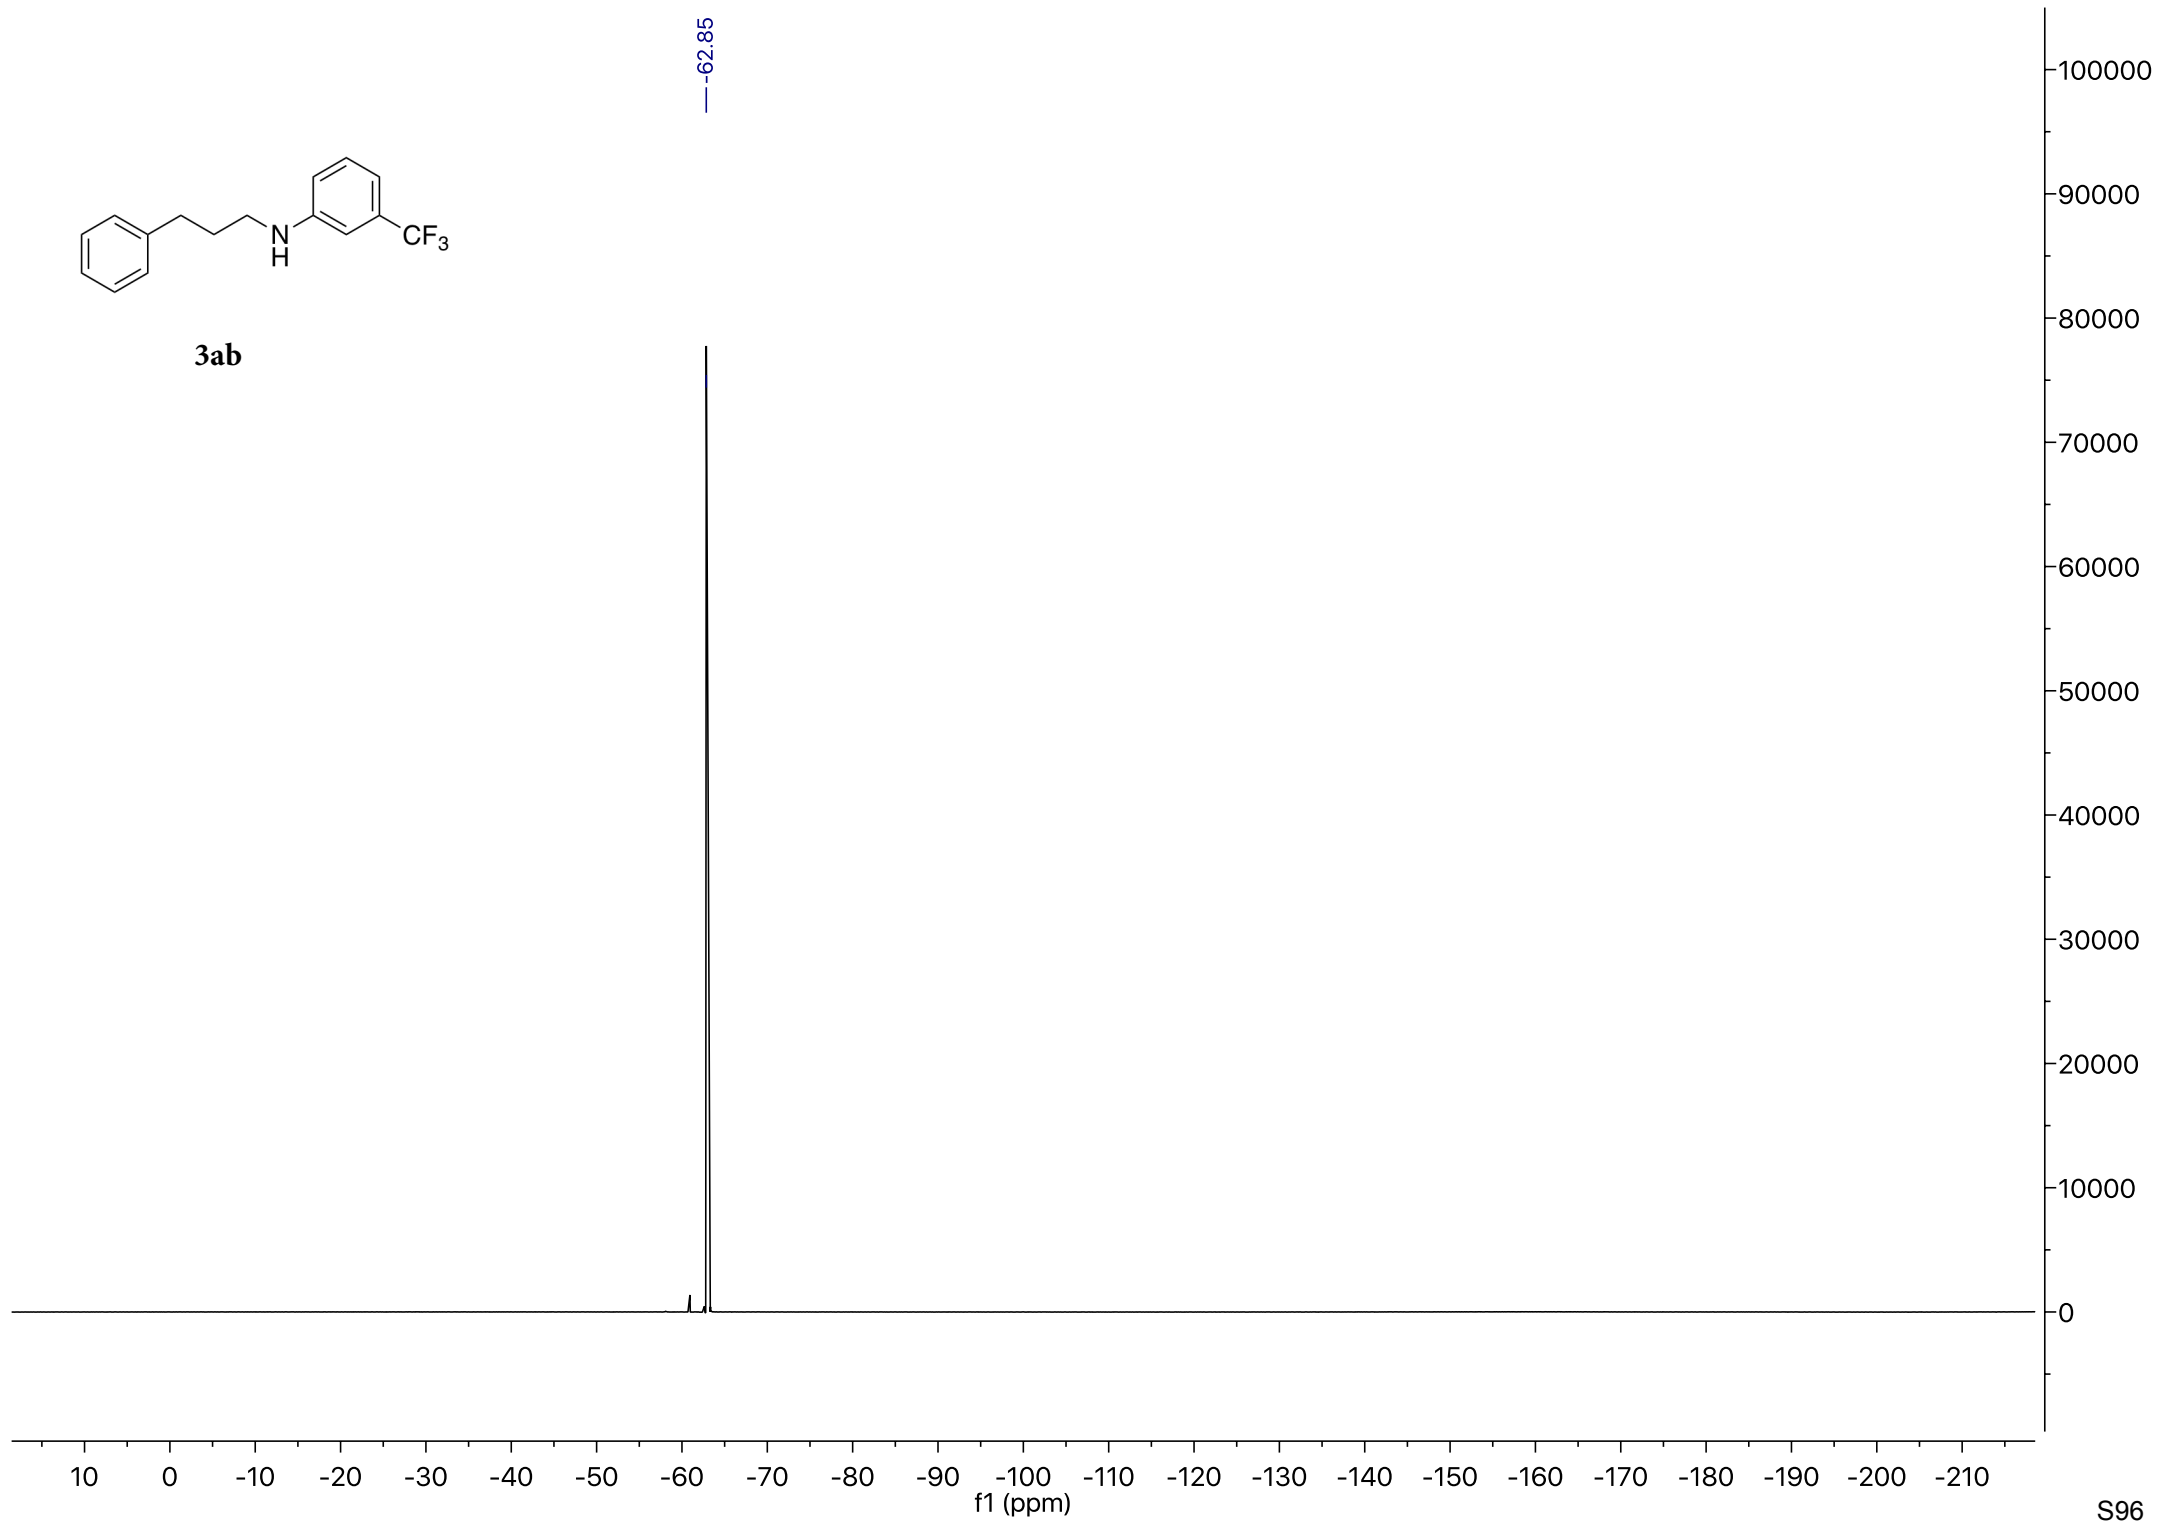

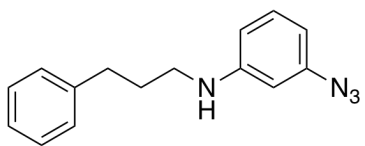

**3ac**

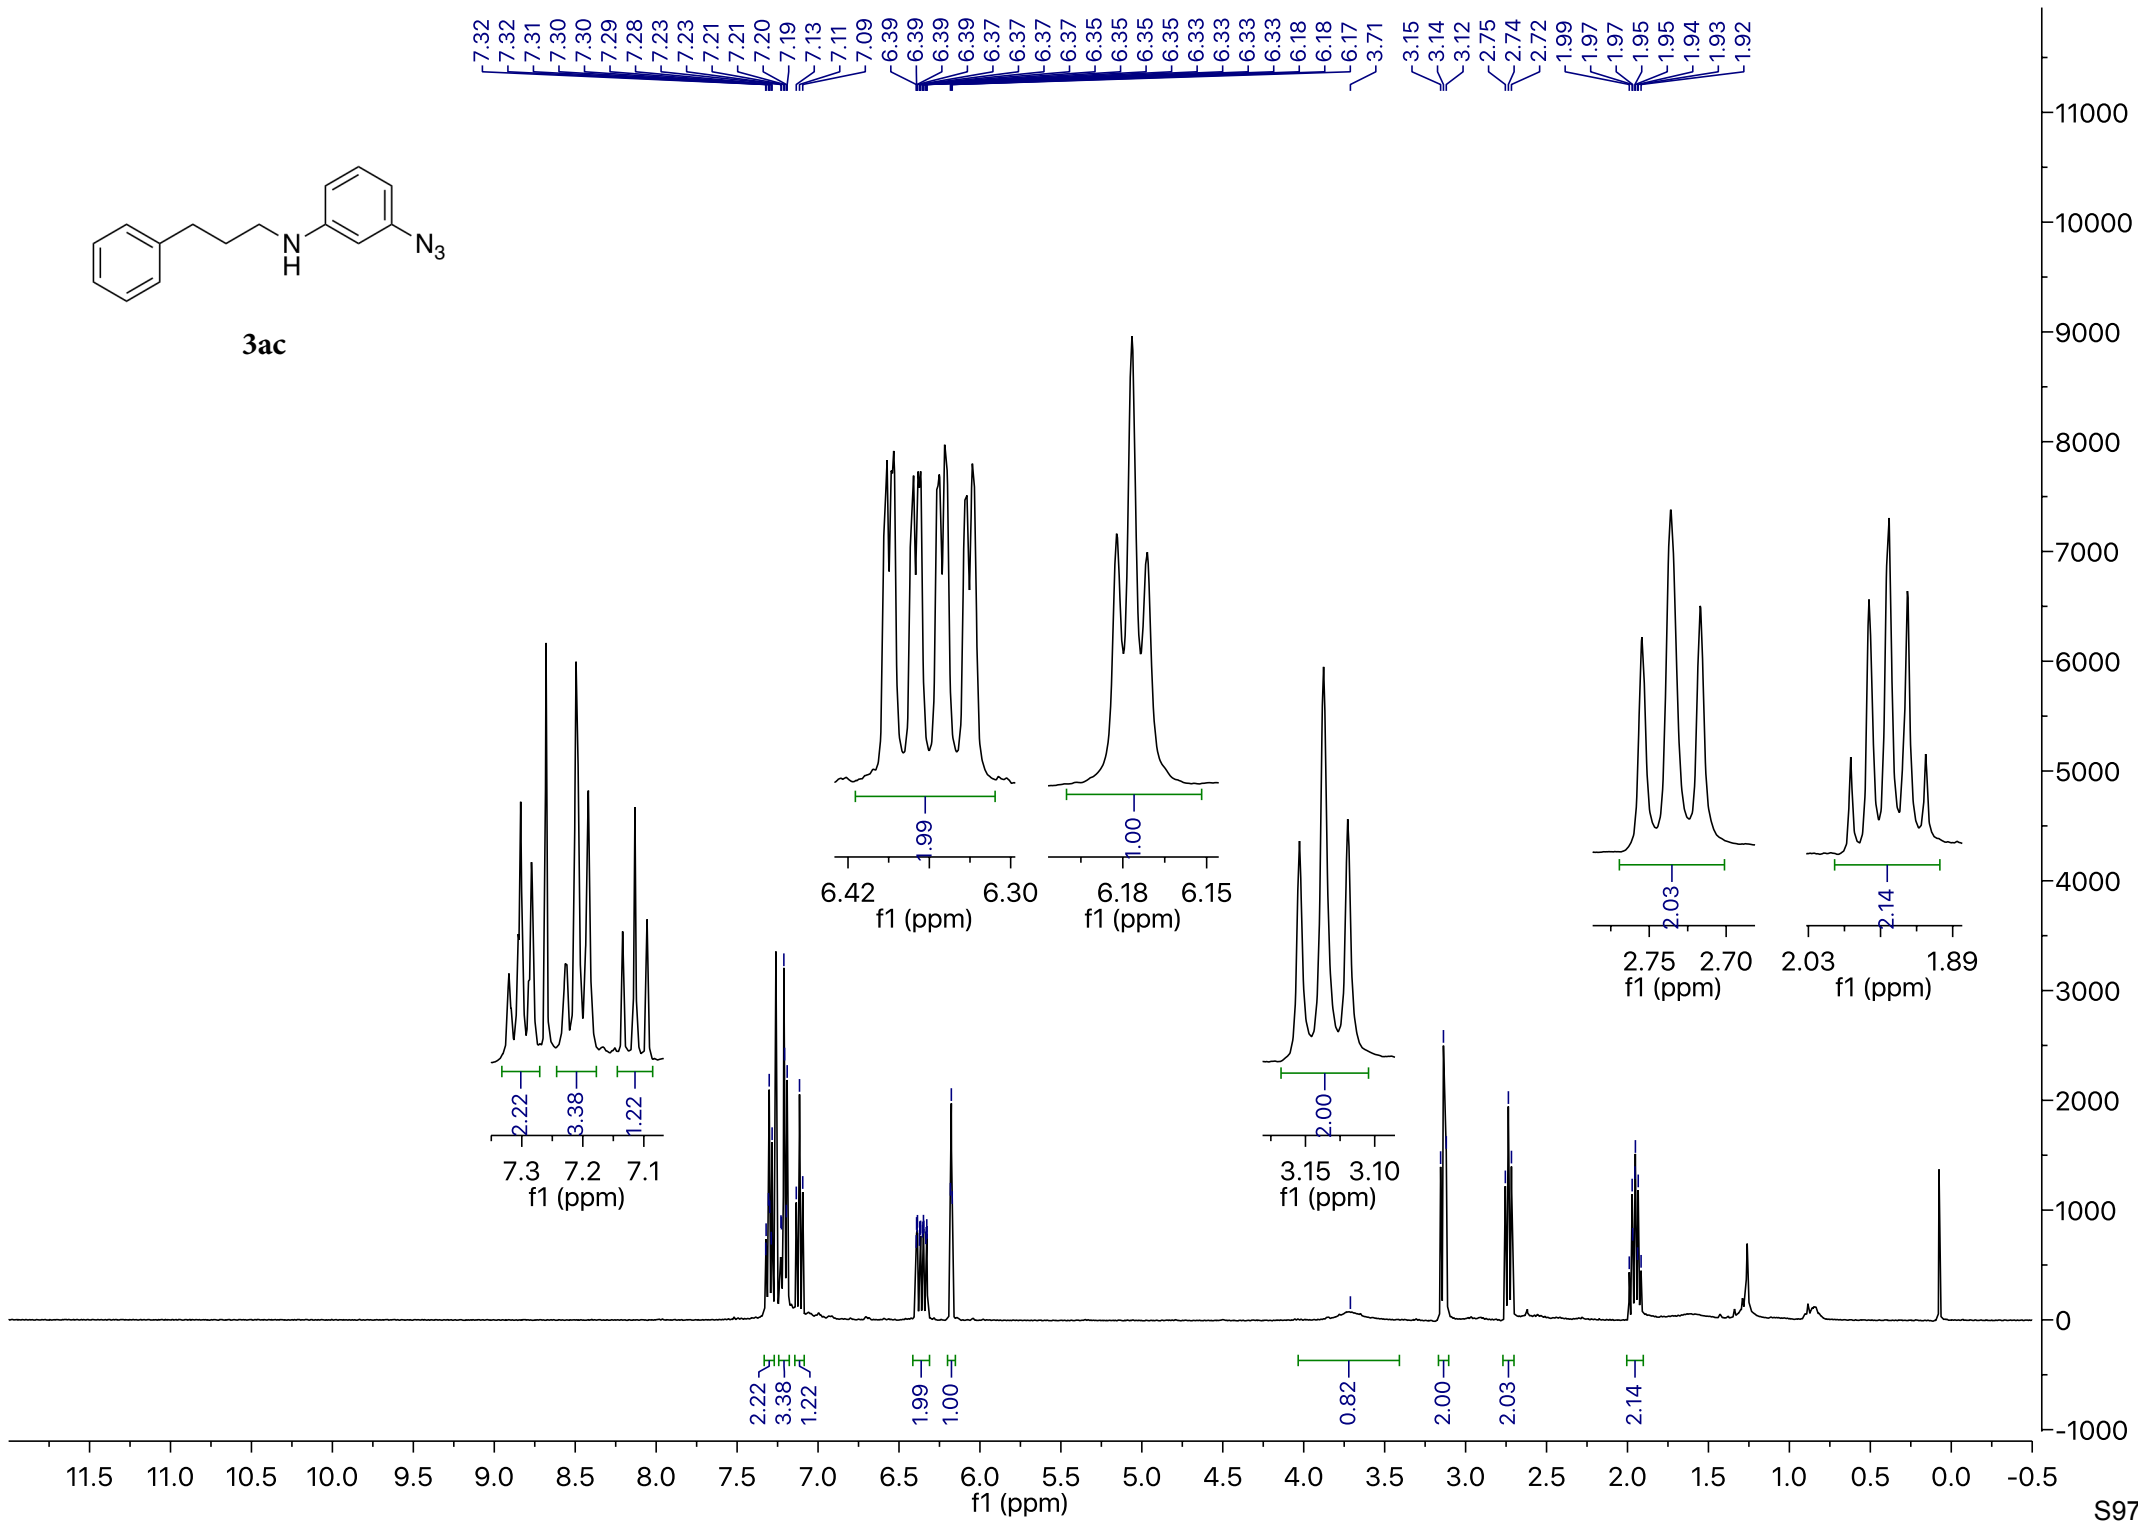

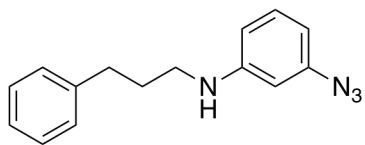

**3ac**

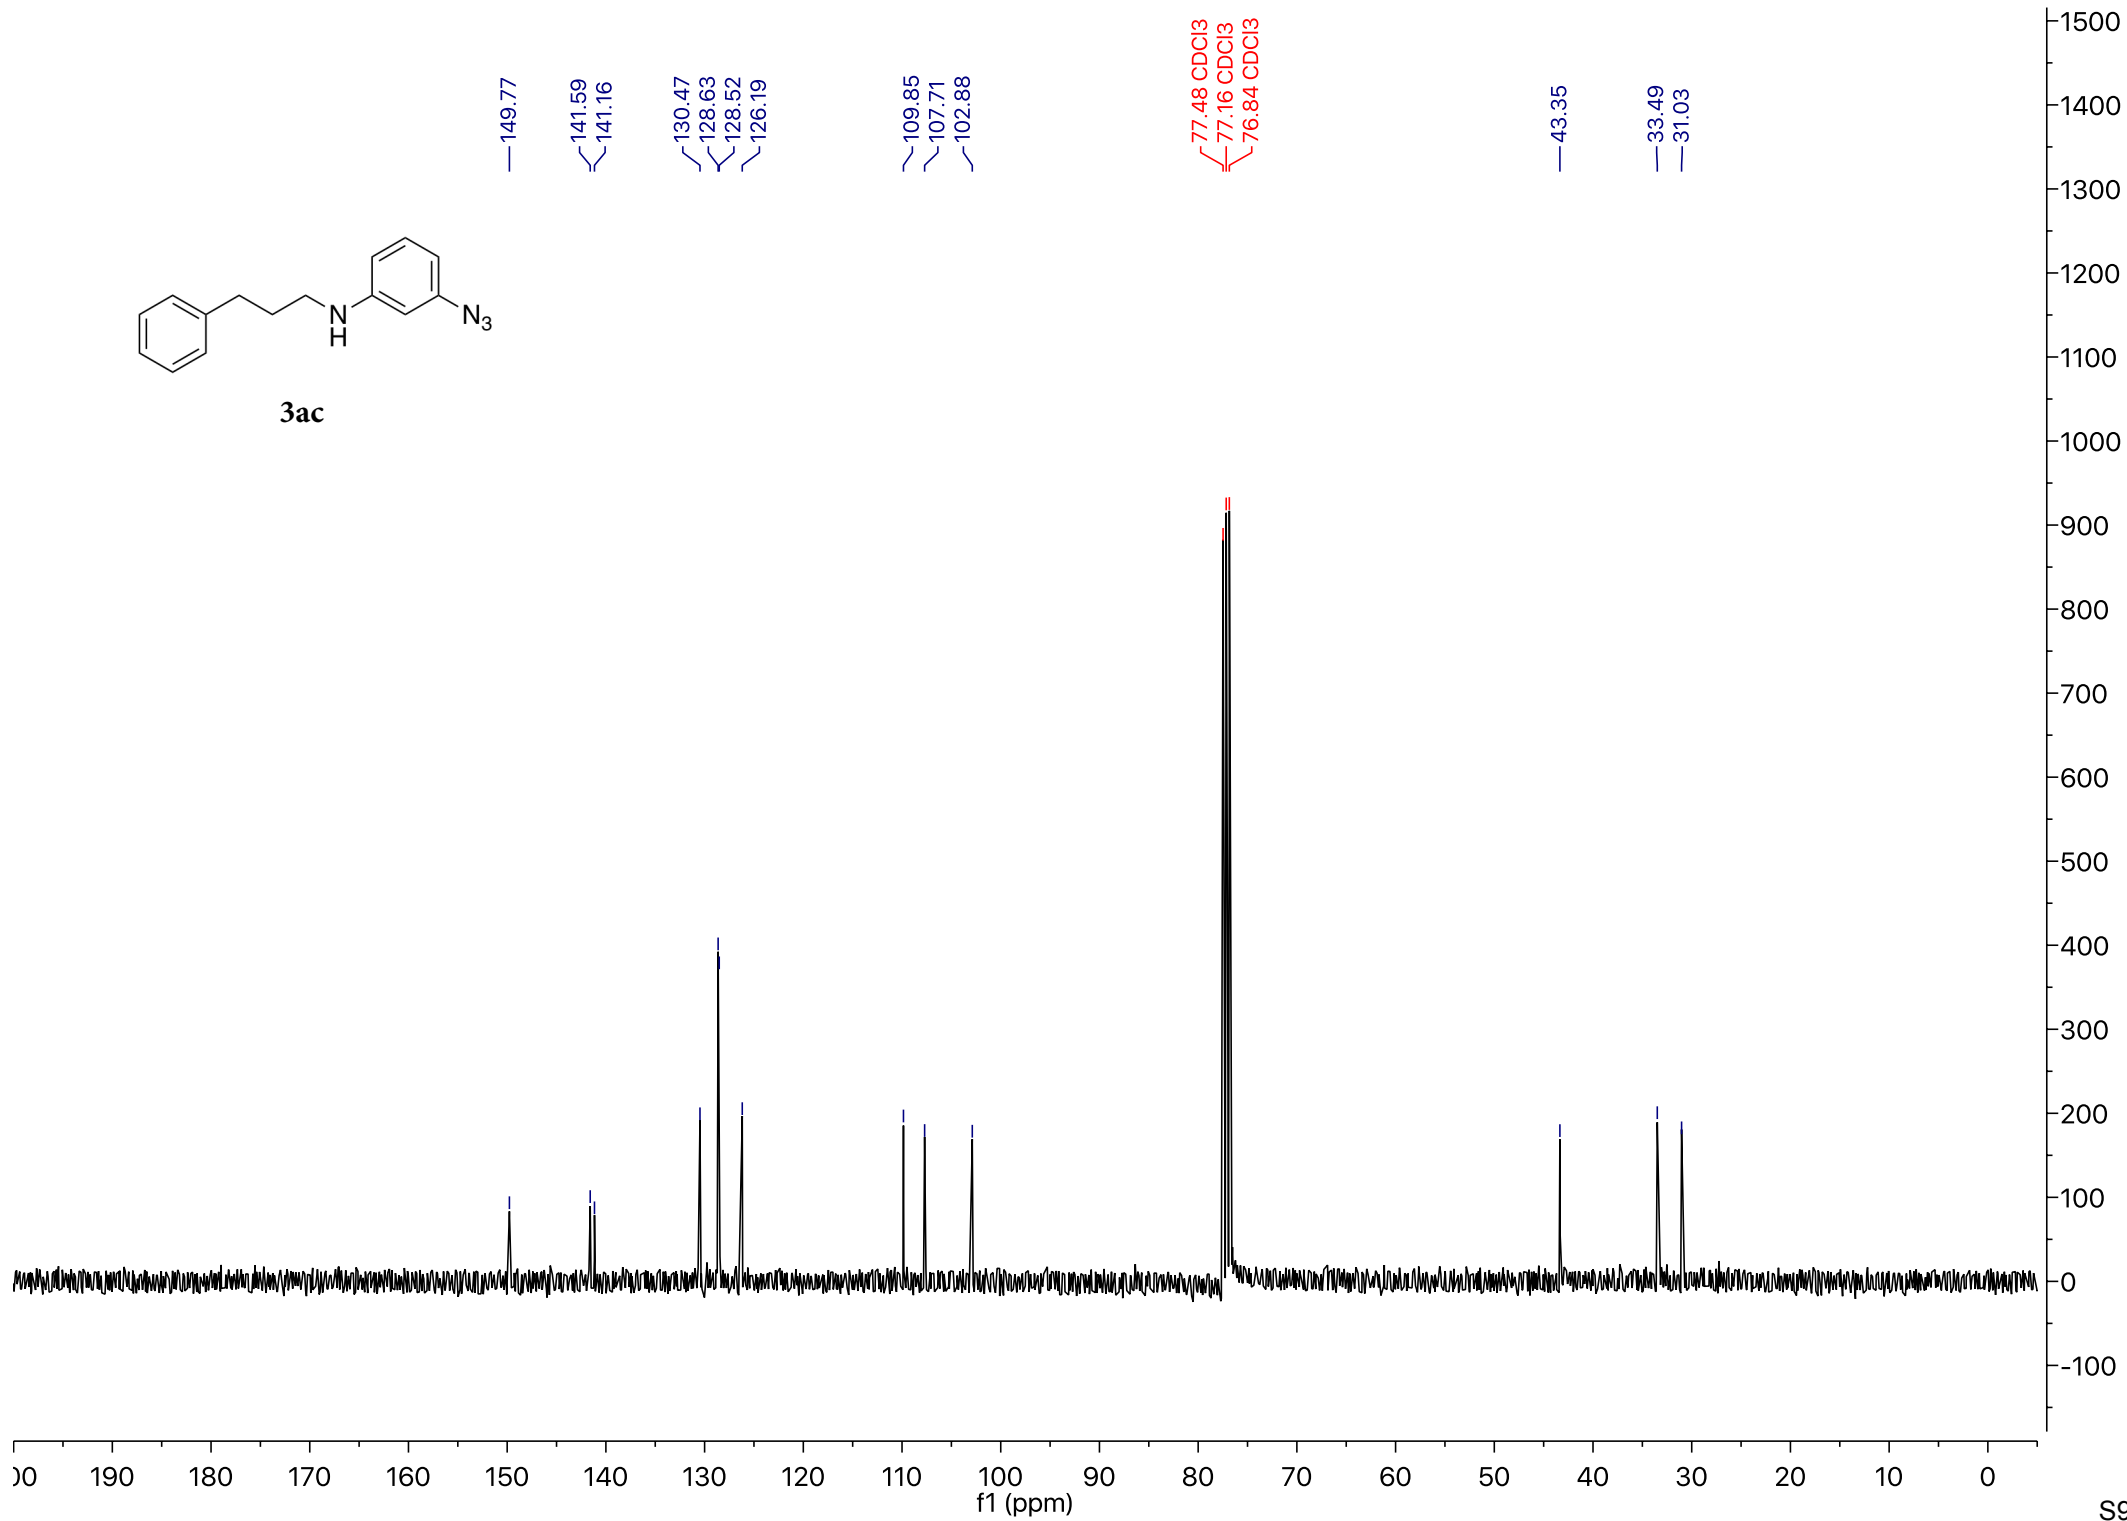

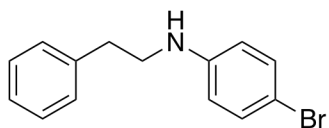

**3ad**

7.34  
7.33  
7.32  
7.32  
7.31  
7.30  
7.27  
7.26 CDCl<sub>3</sub>  
7.25  
7.25  
7.24  
7.24  
7.23  
7.22  
7.22  
7.21  
7.20  
7.20  
7.20  
6.50  
6.49  
6.49  
6.48  
6.47  
6.46

3.69  
3.39  
3.37  
3.35  
2.92  
2.91  
2.89

1.54 H<sub>2</sub>O

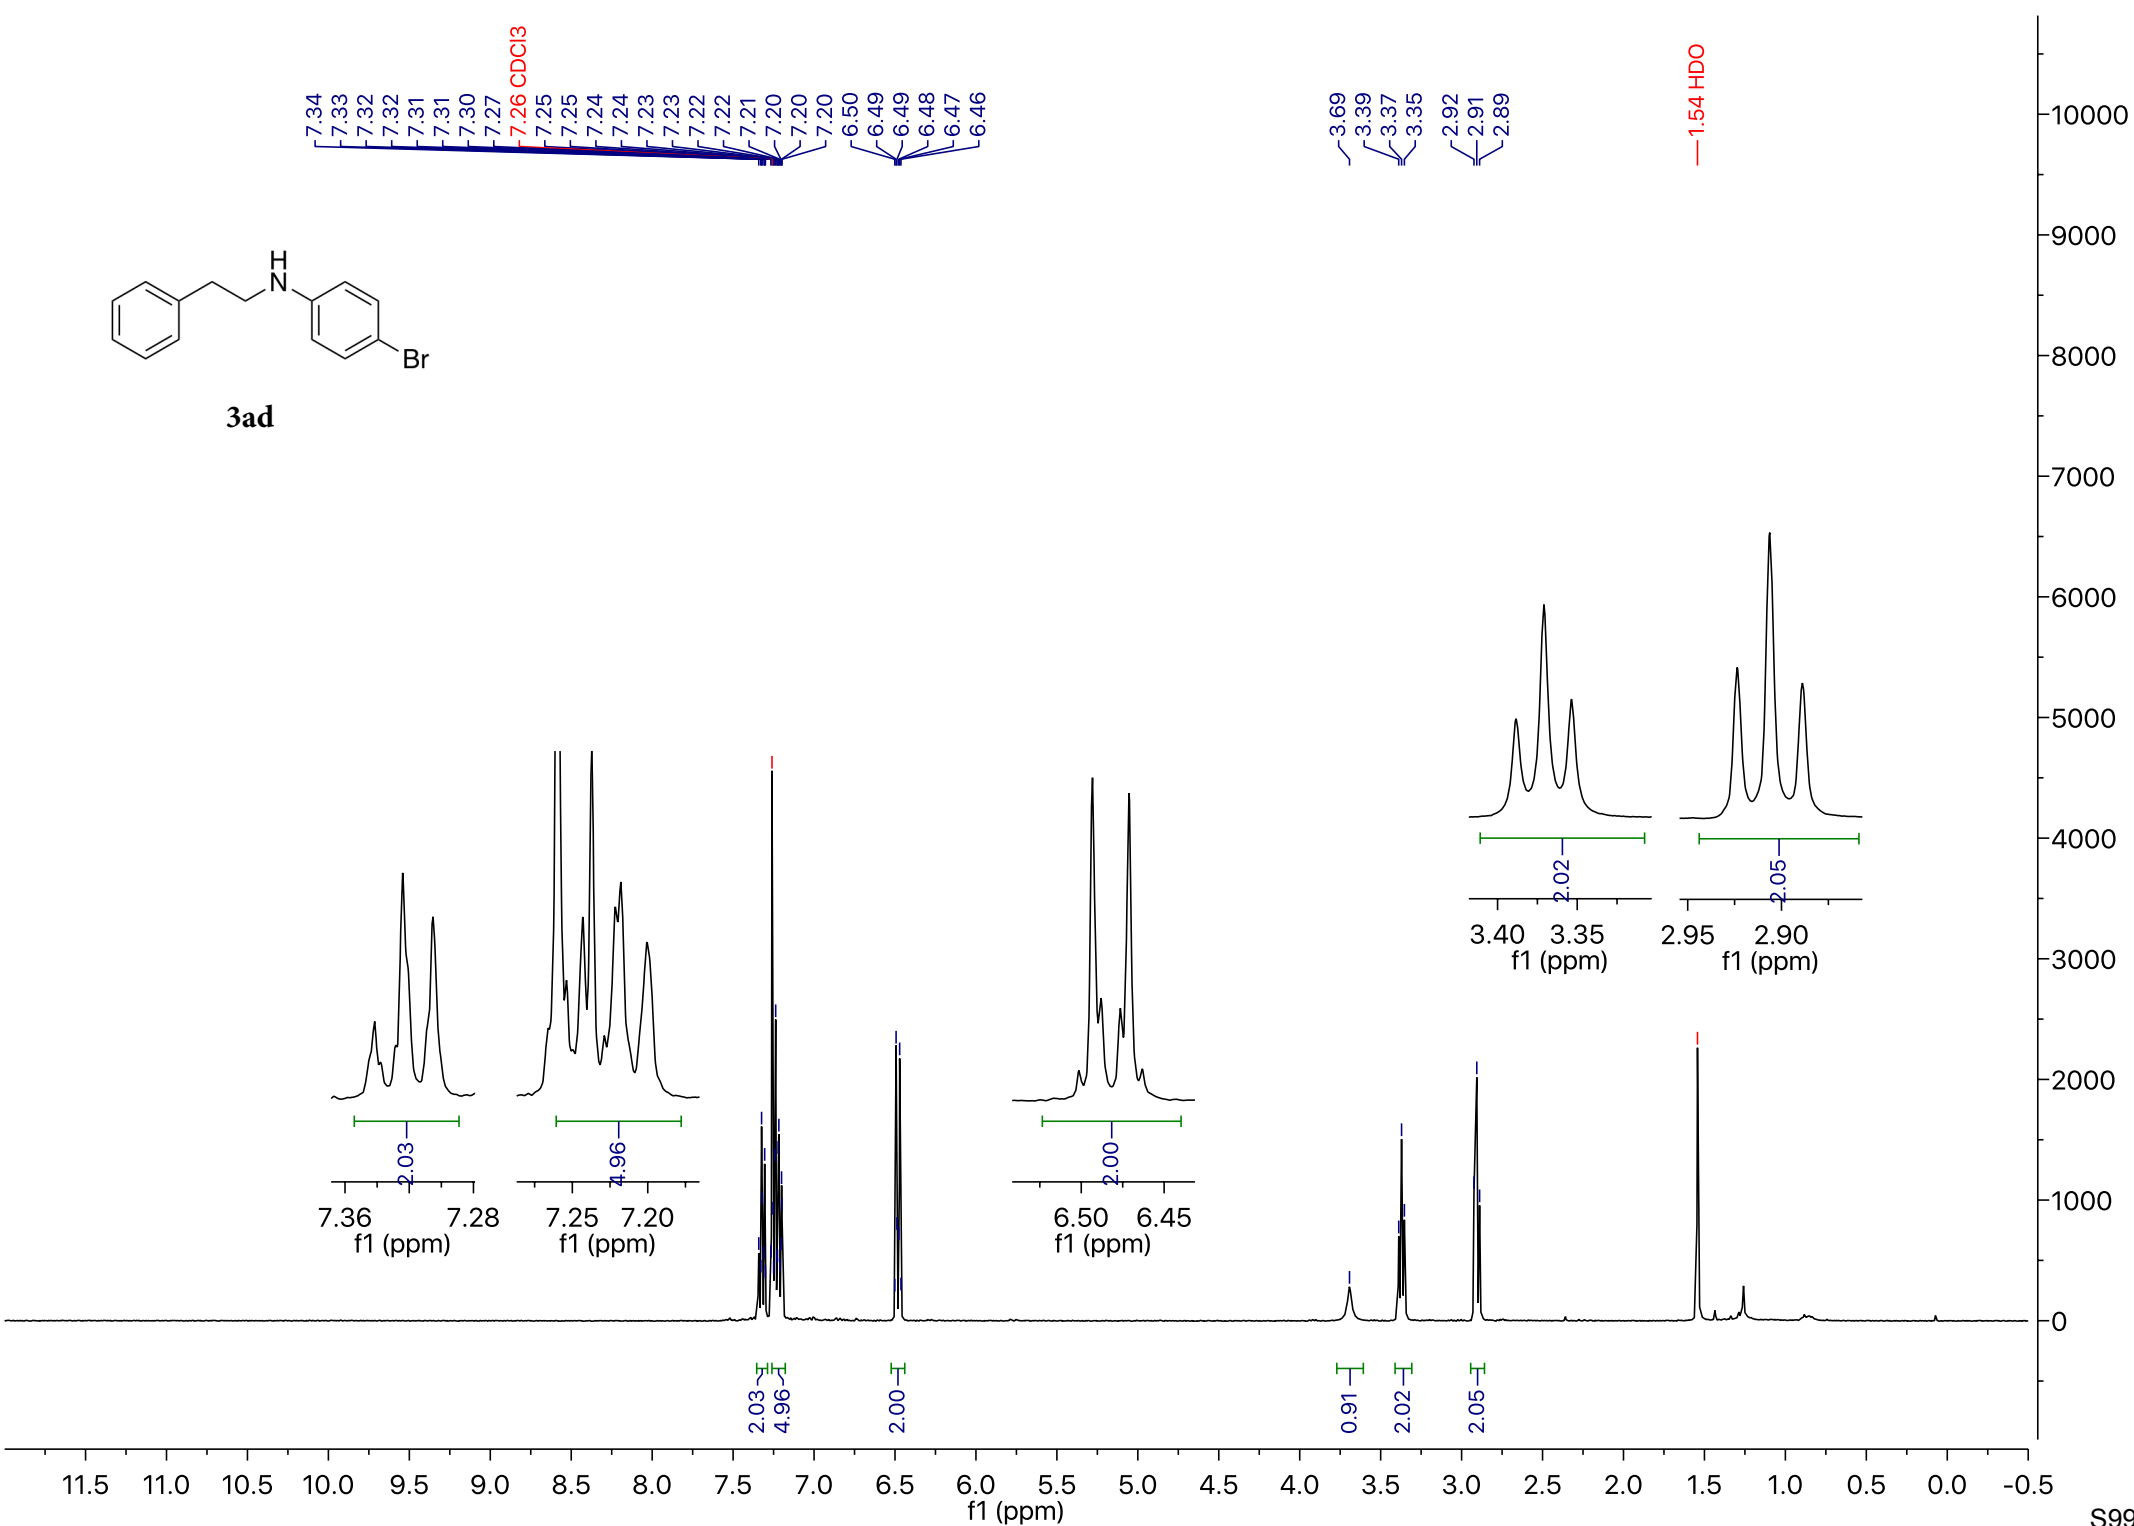



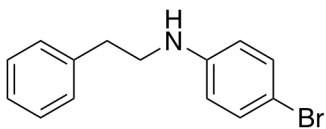

**3ad**

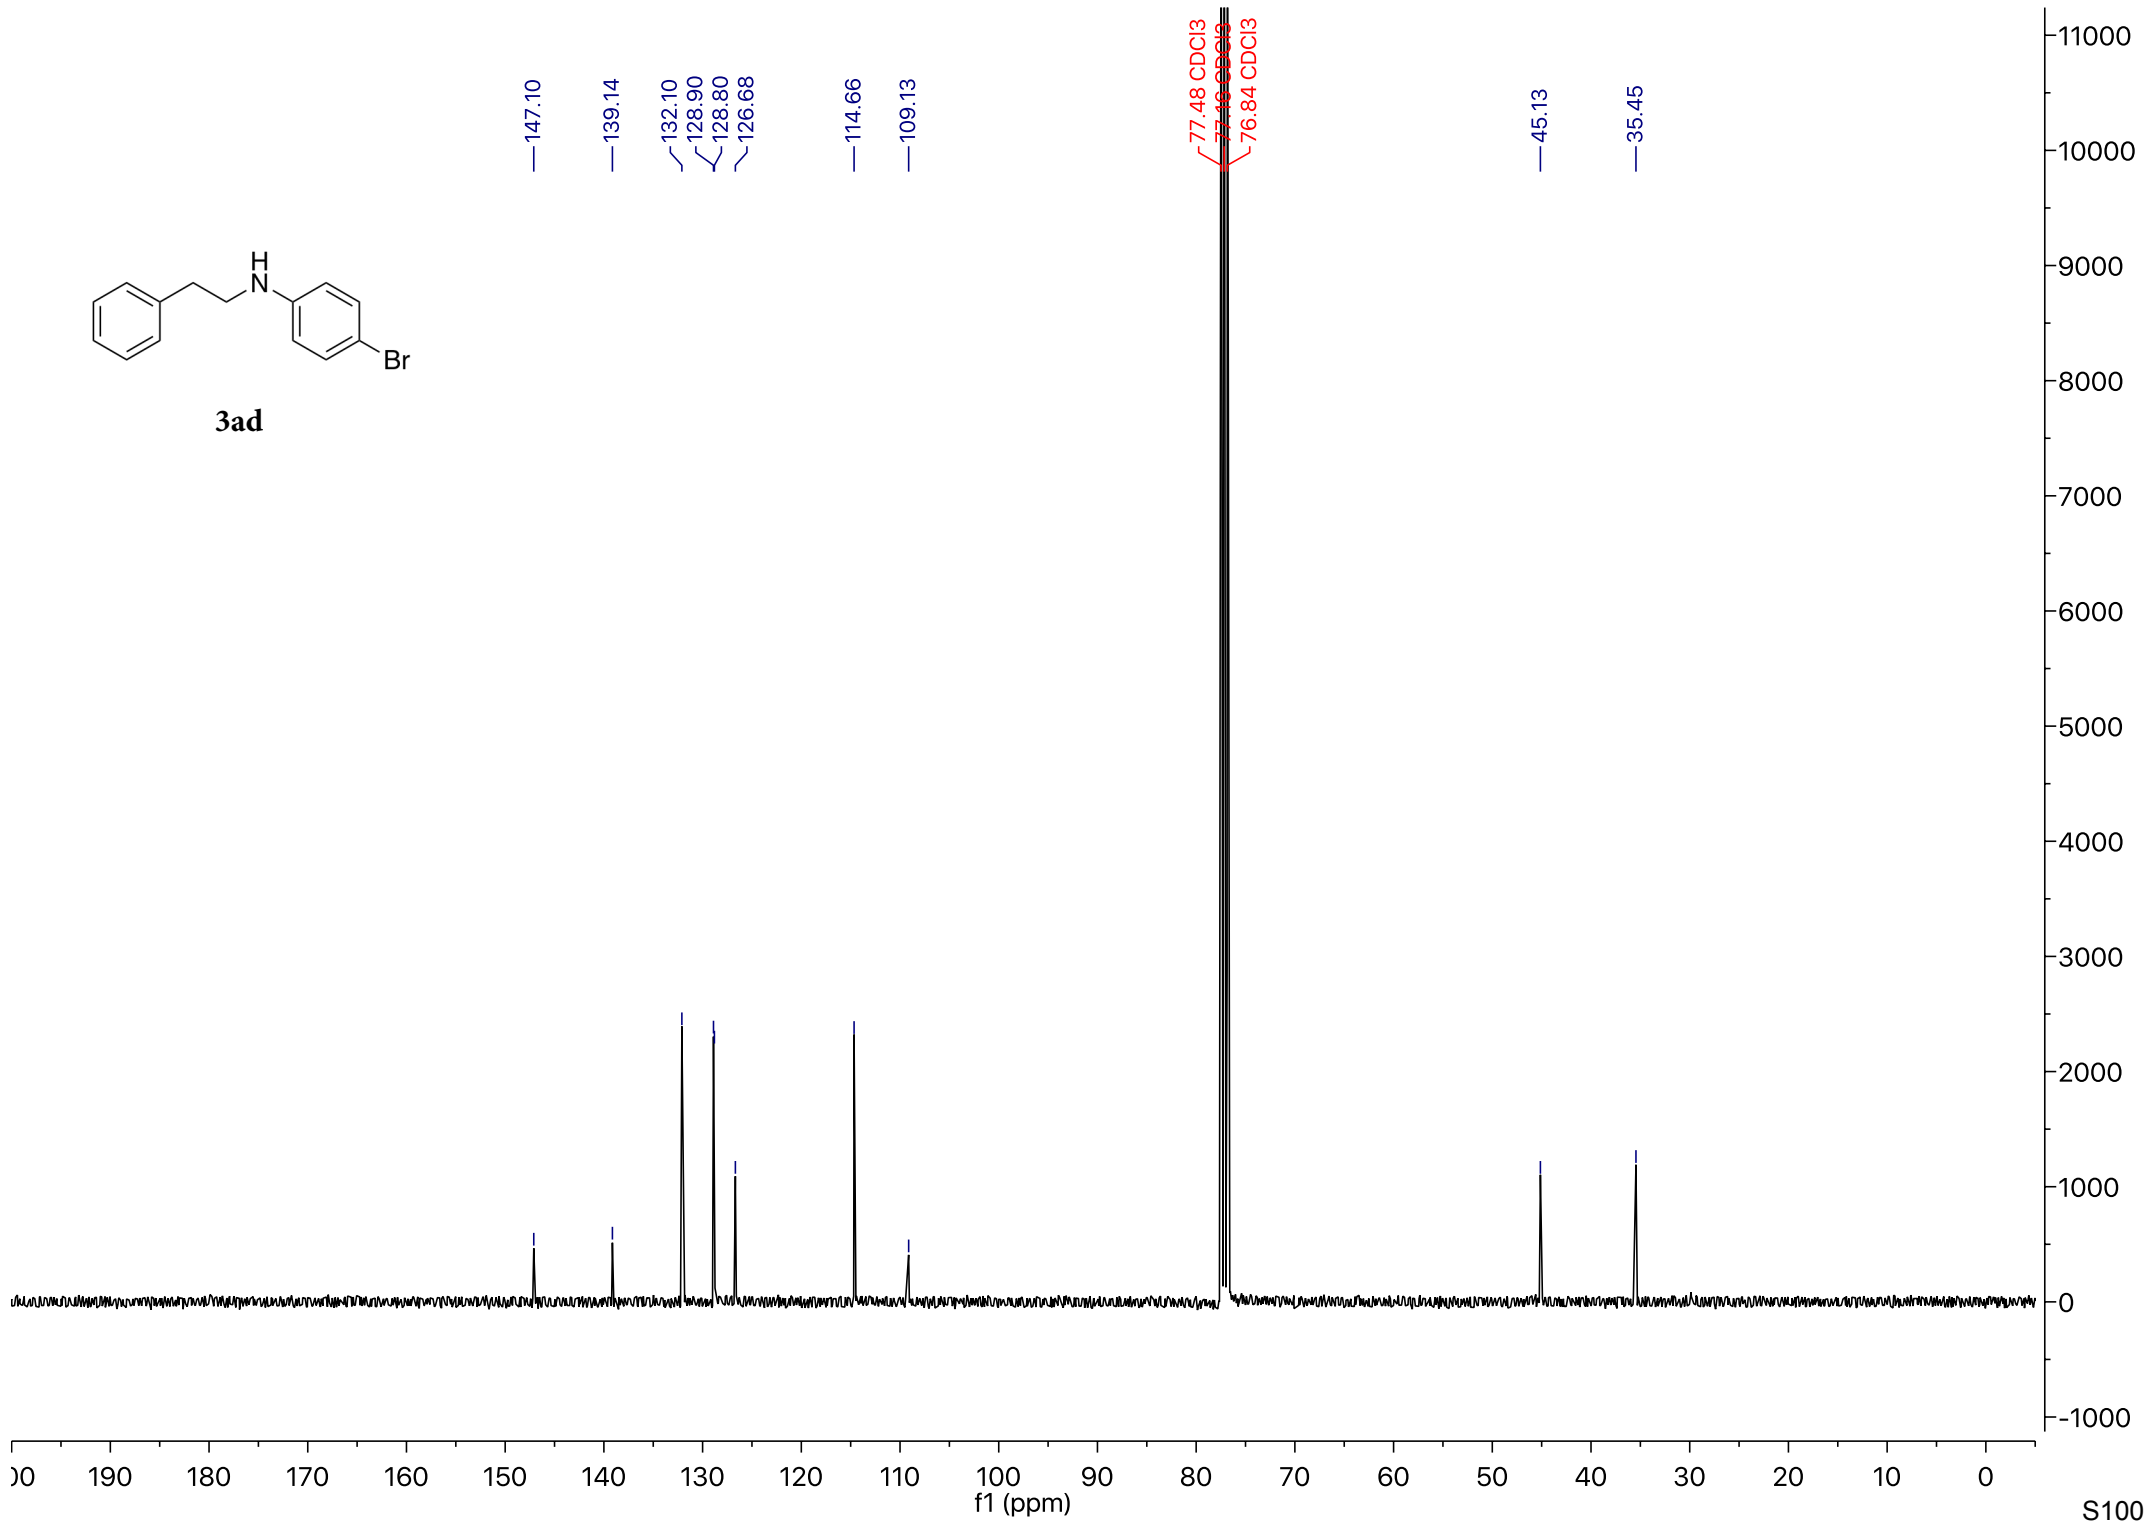

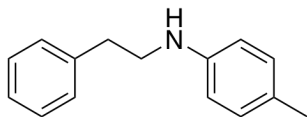

3ae

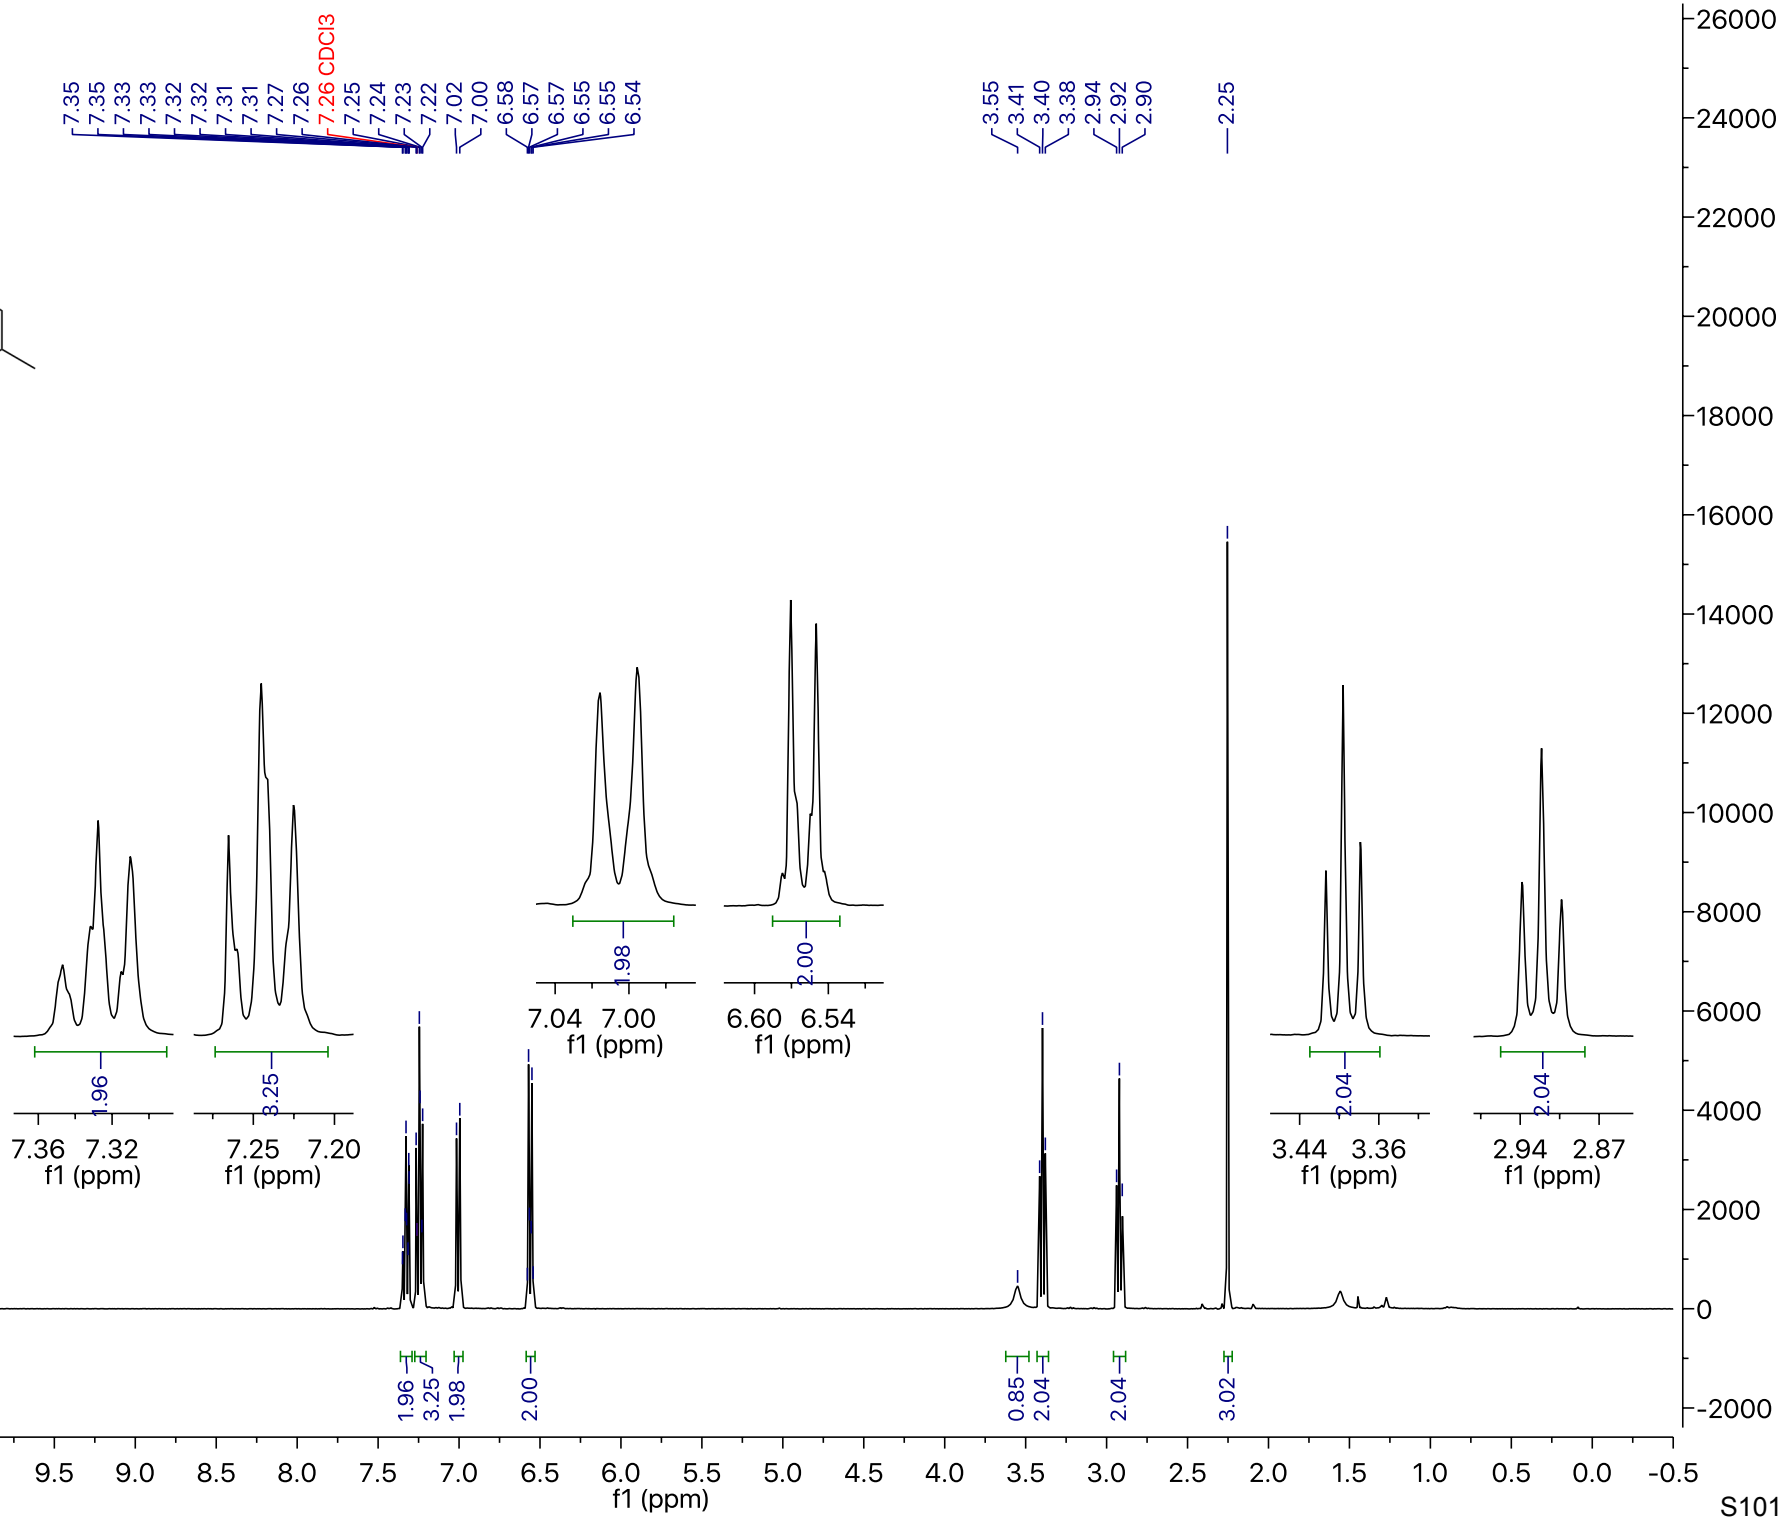

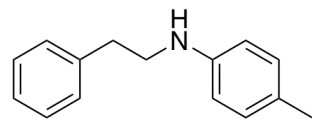

3ae

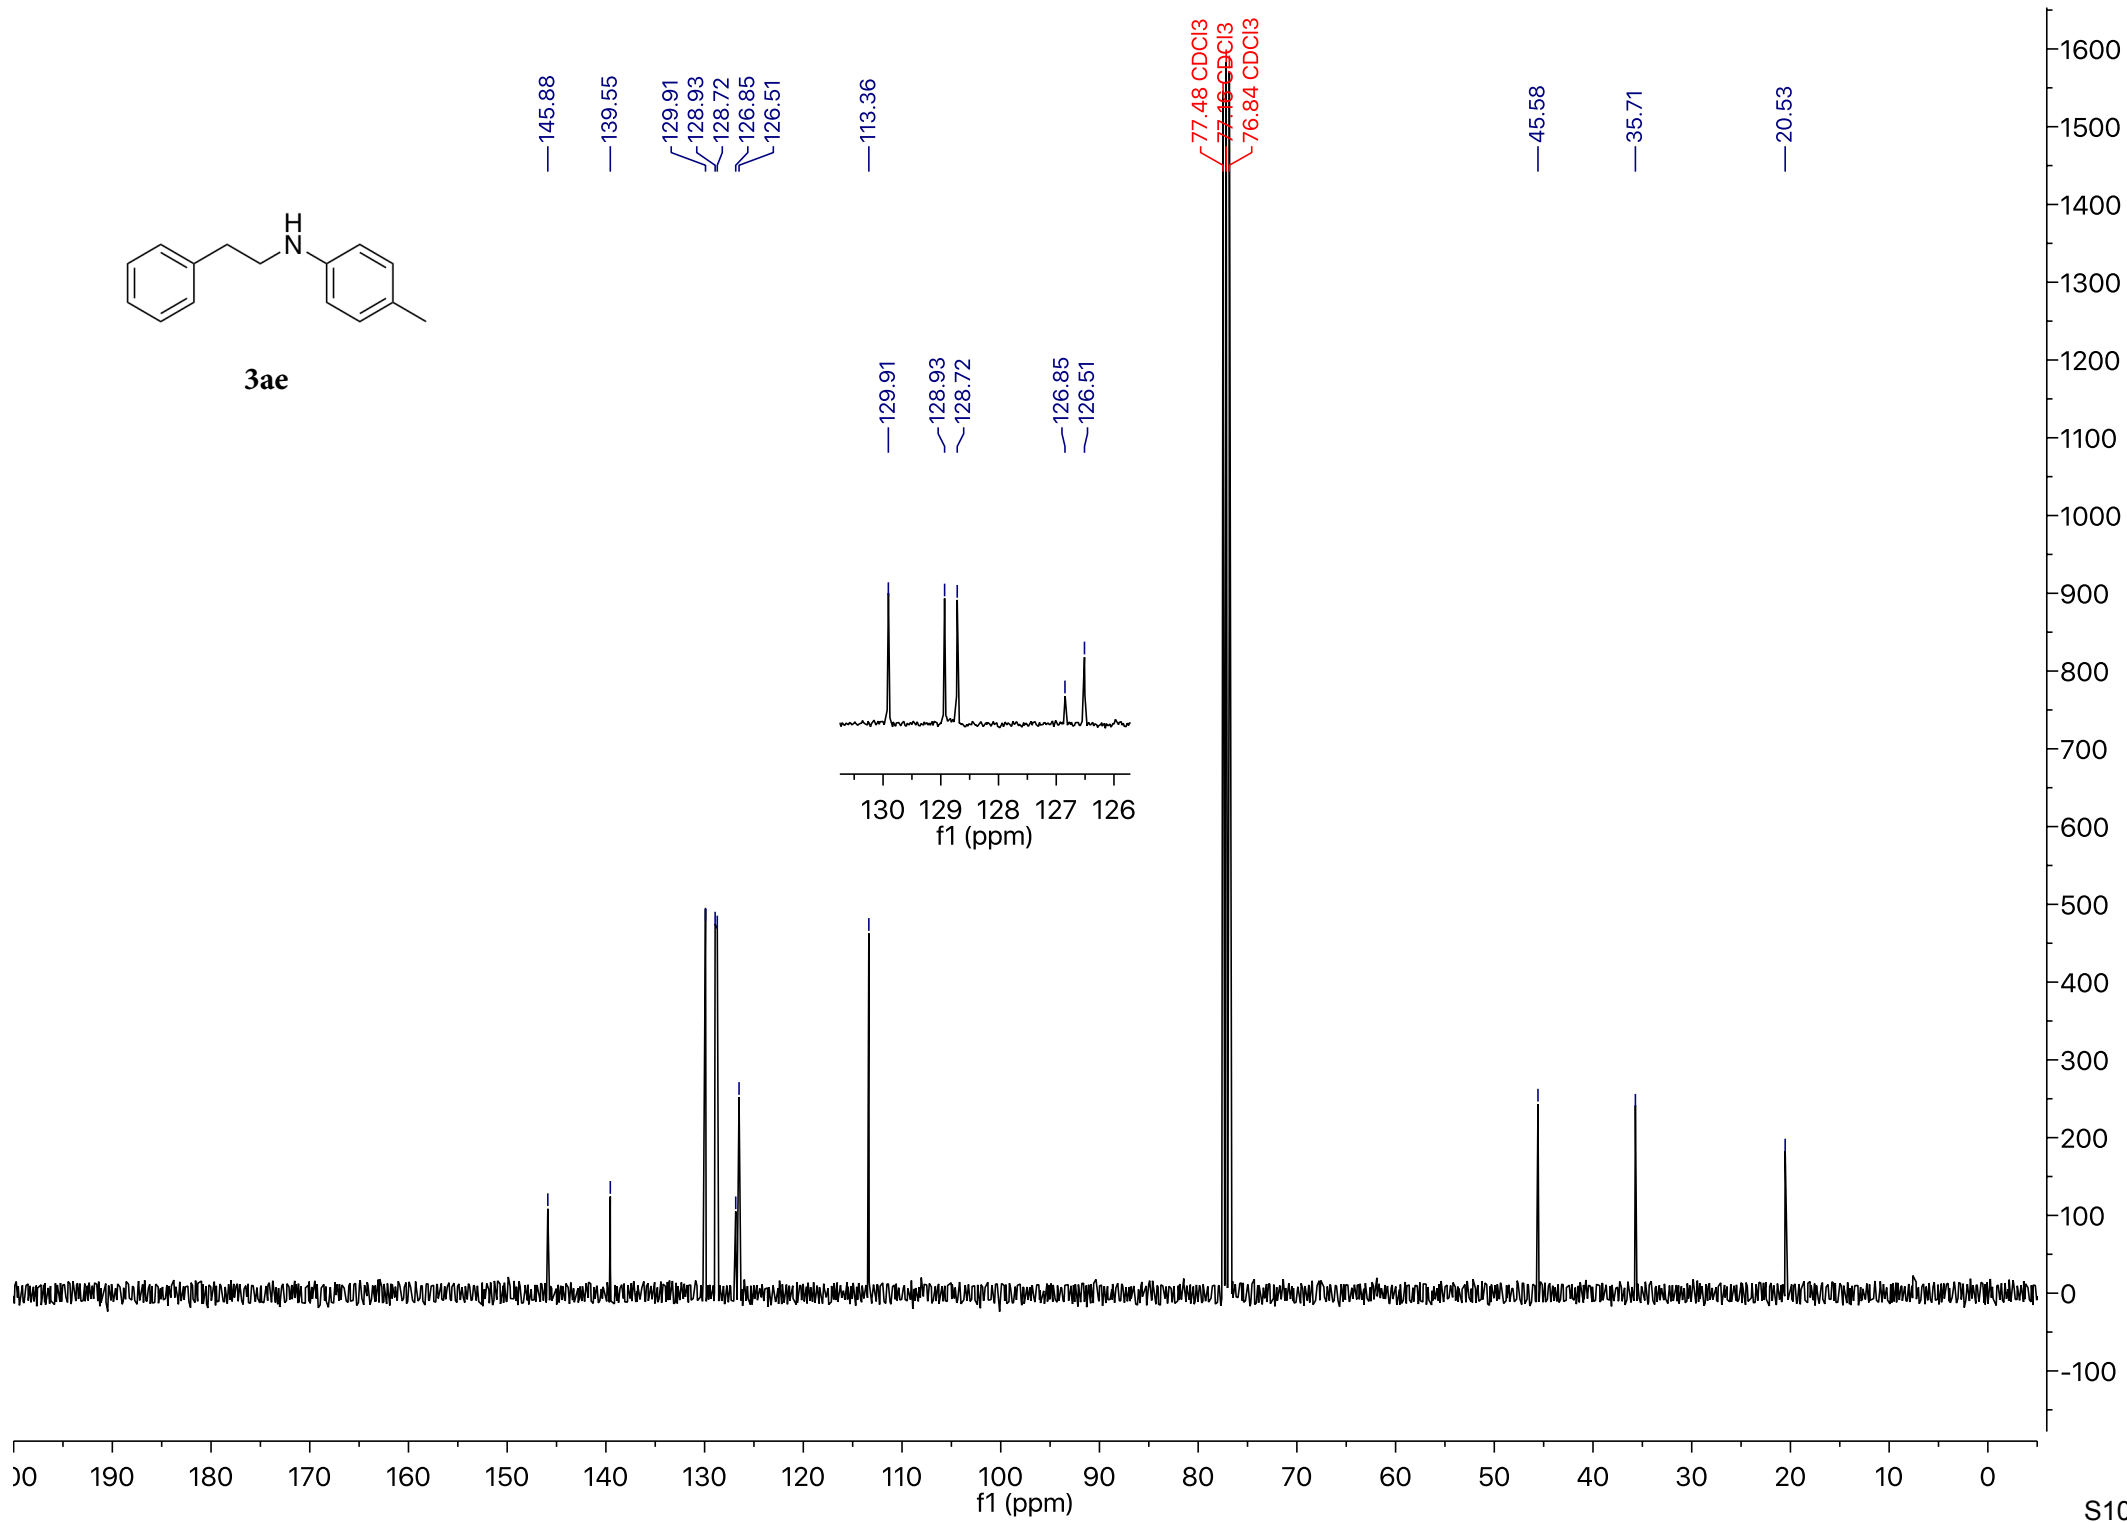

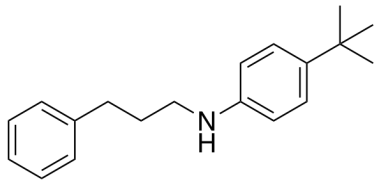

**3af**

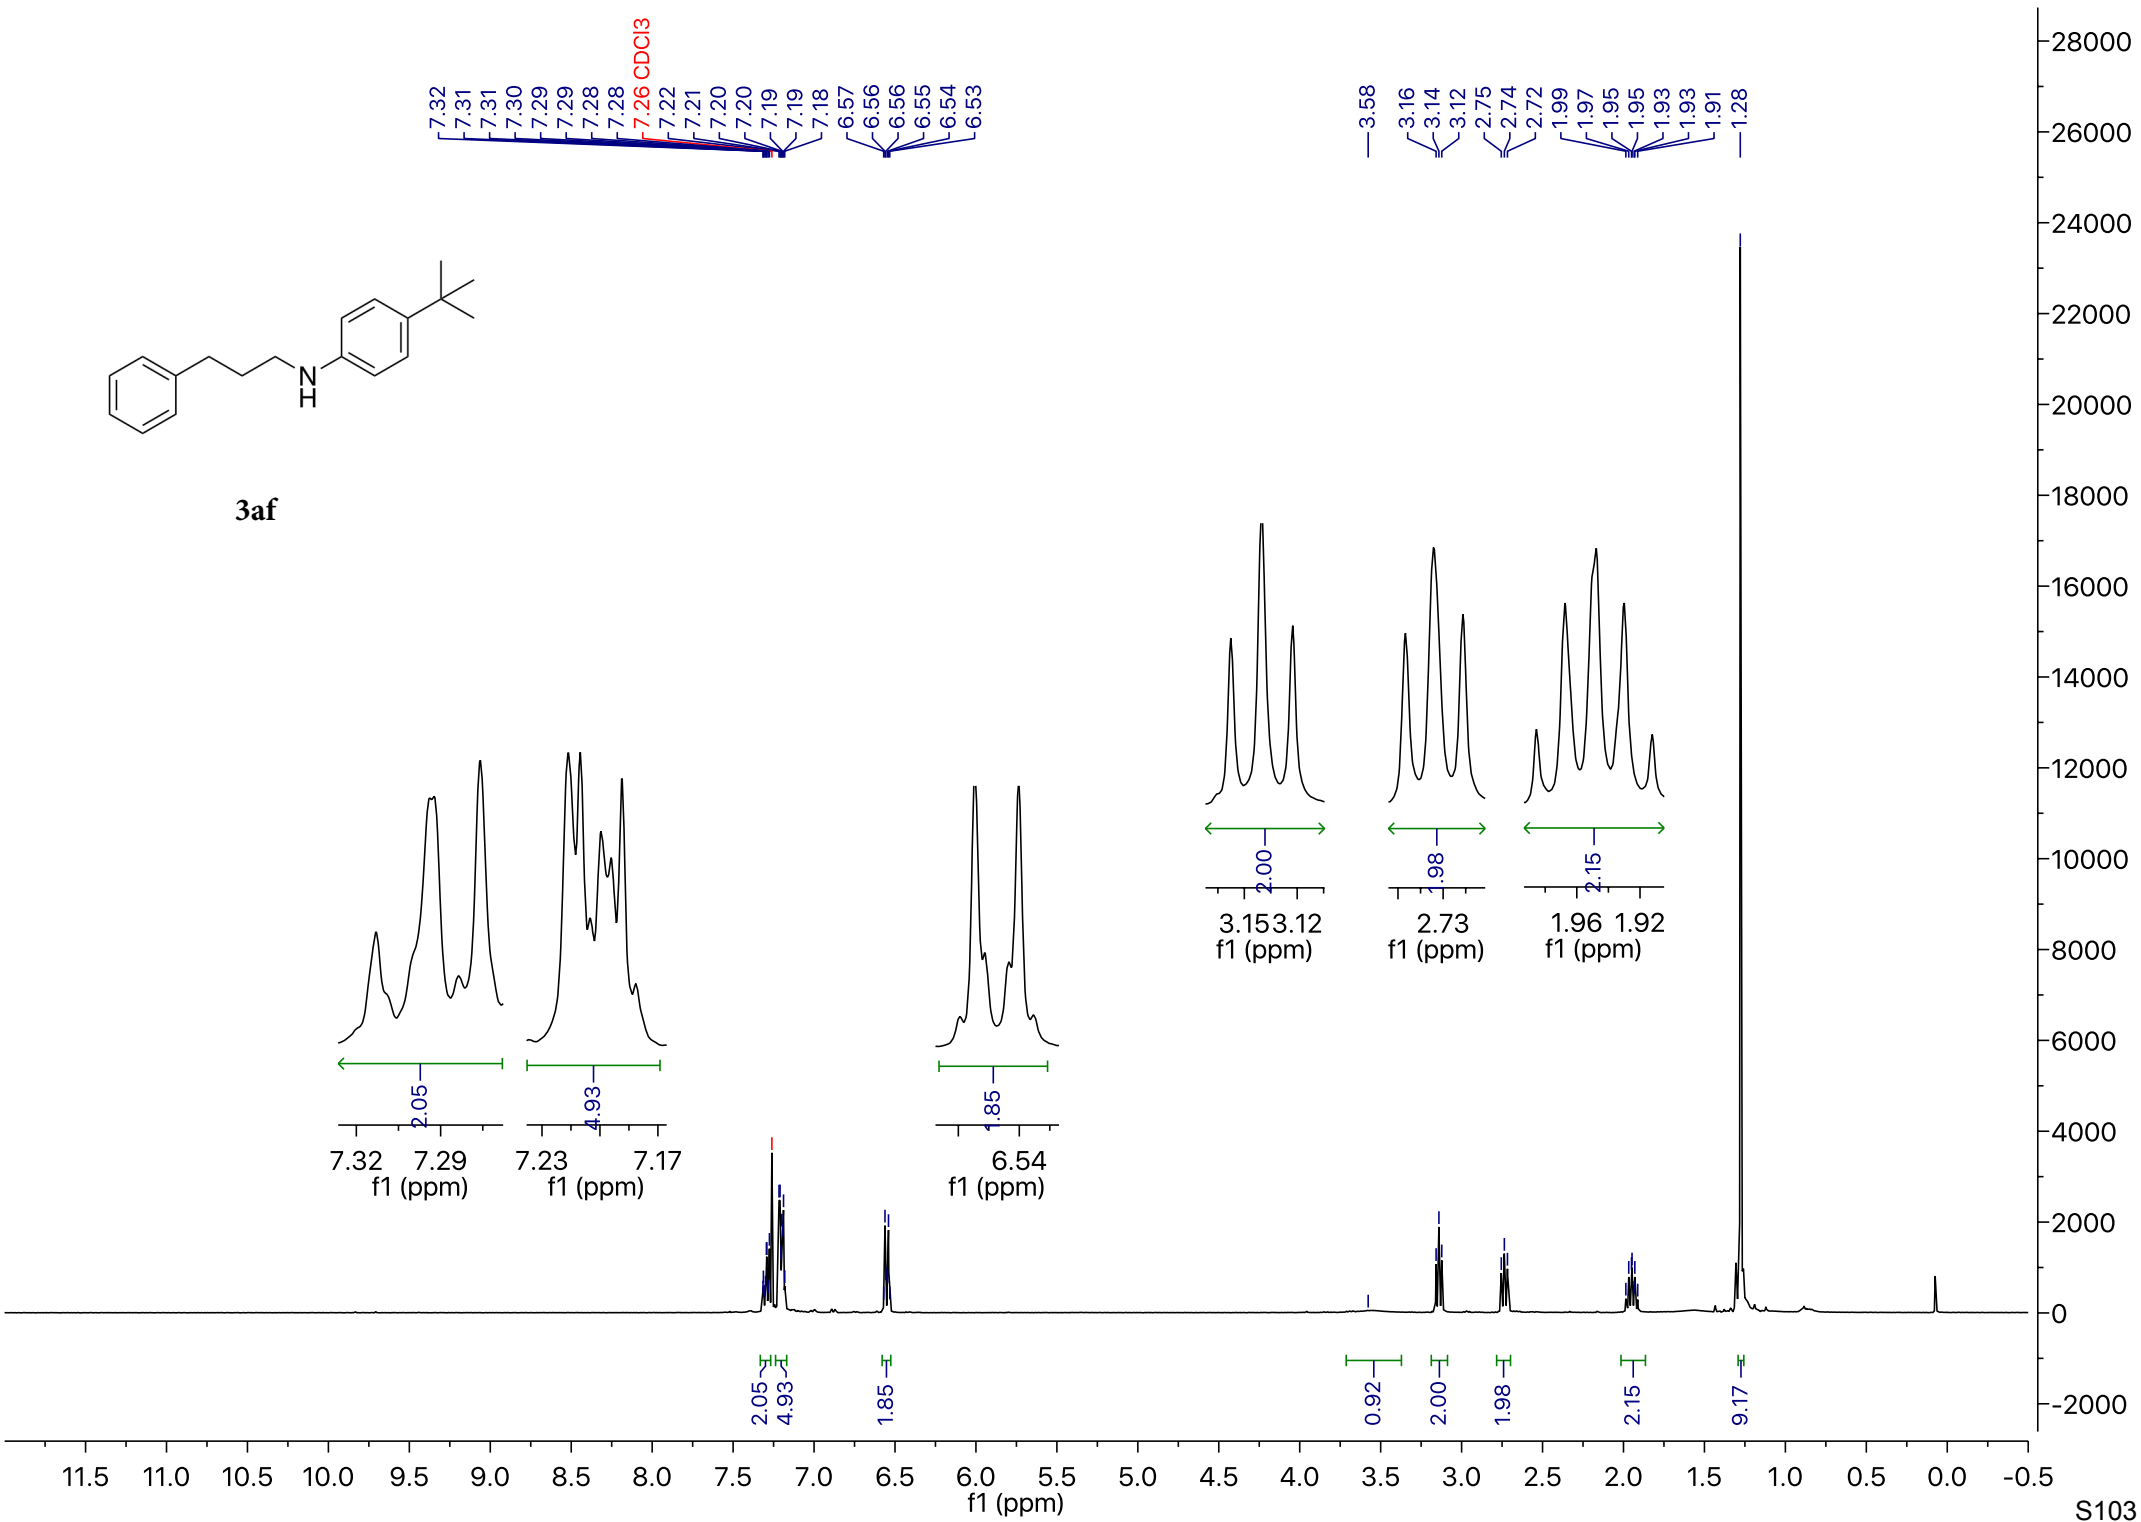

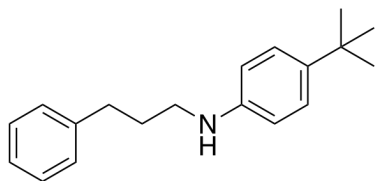

3af

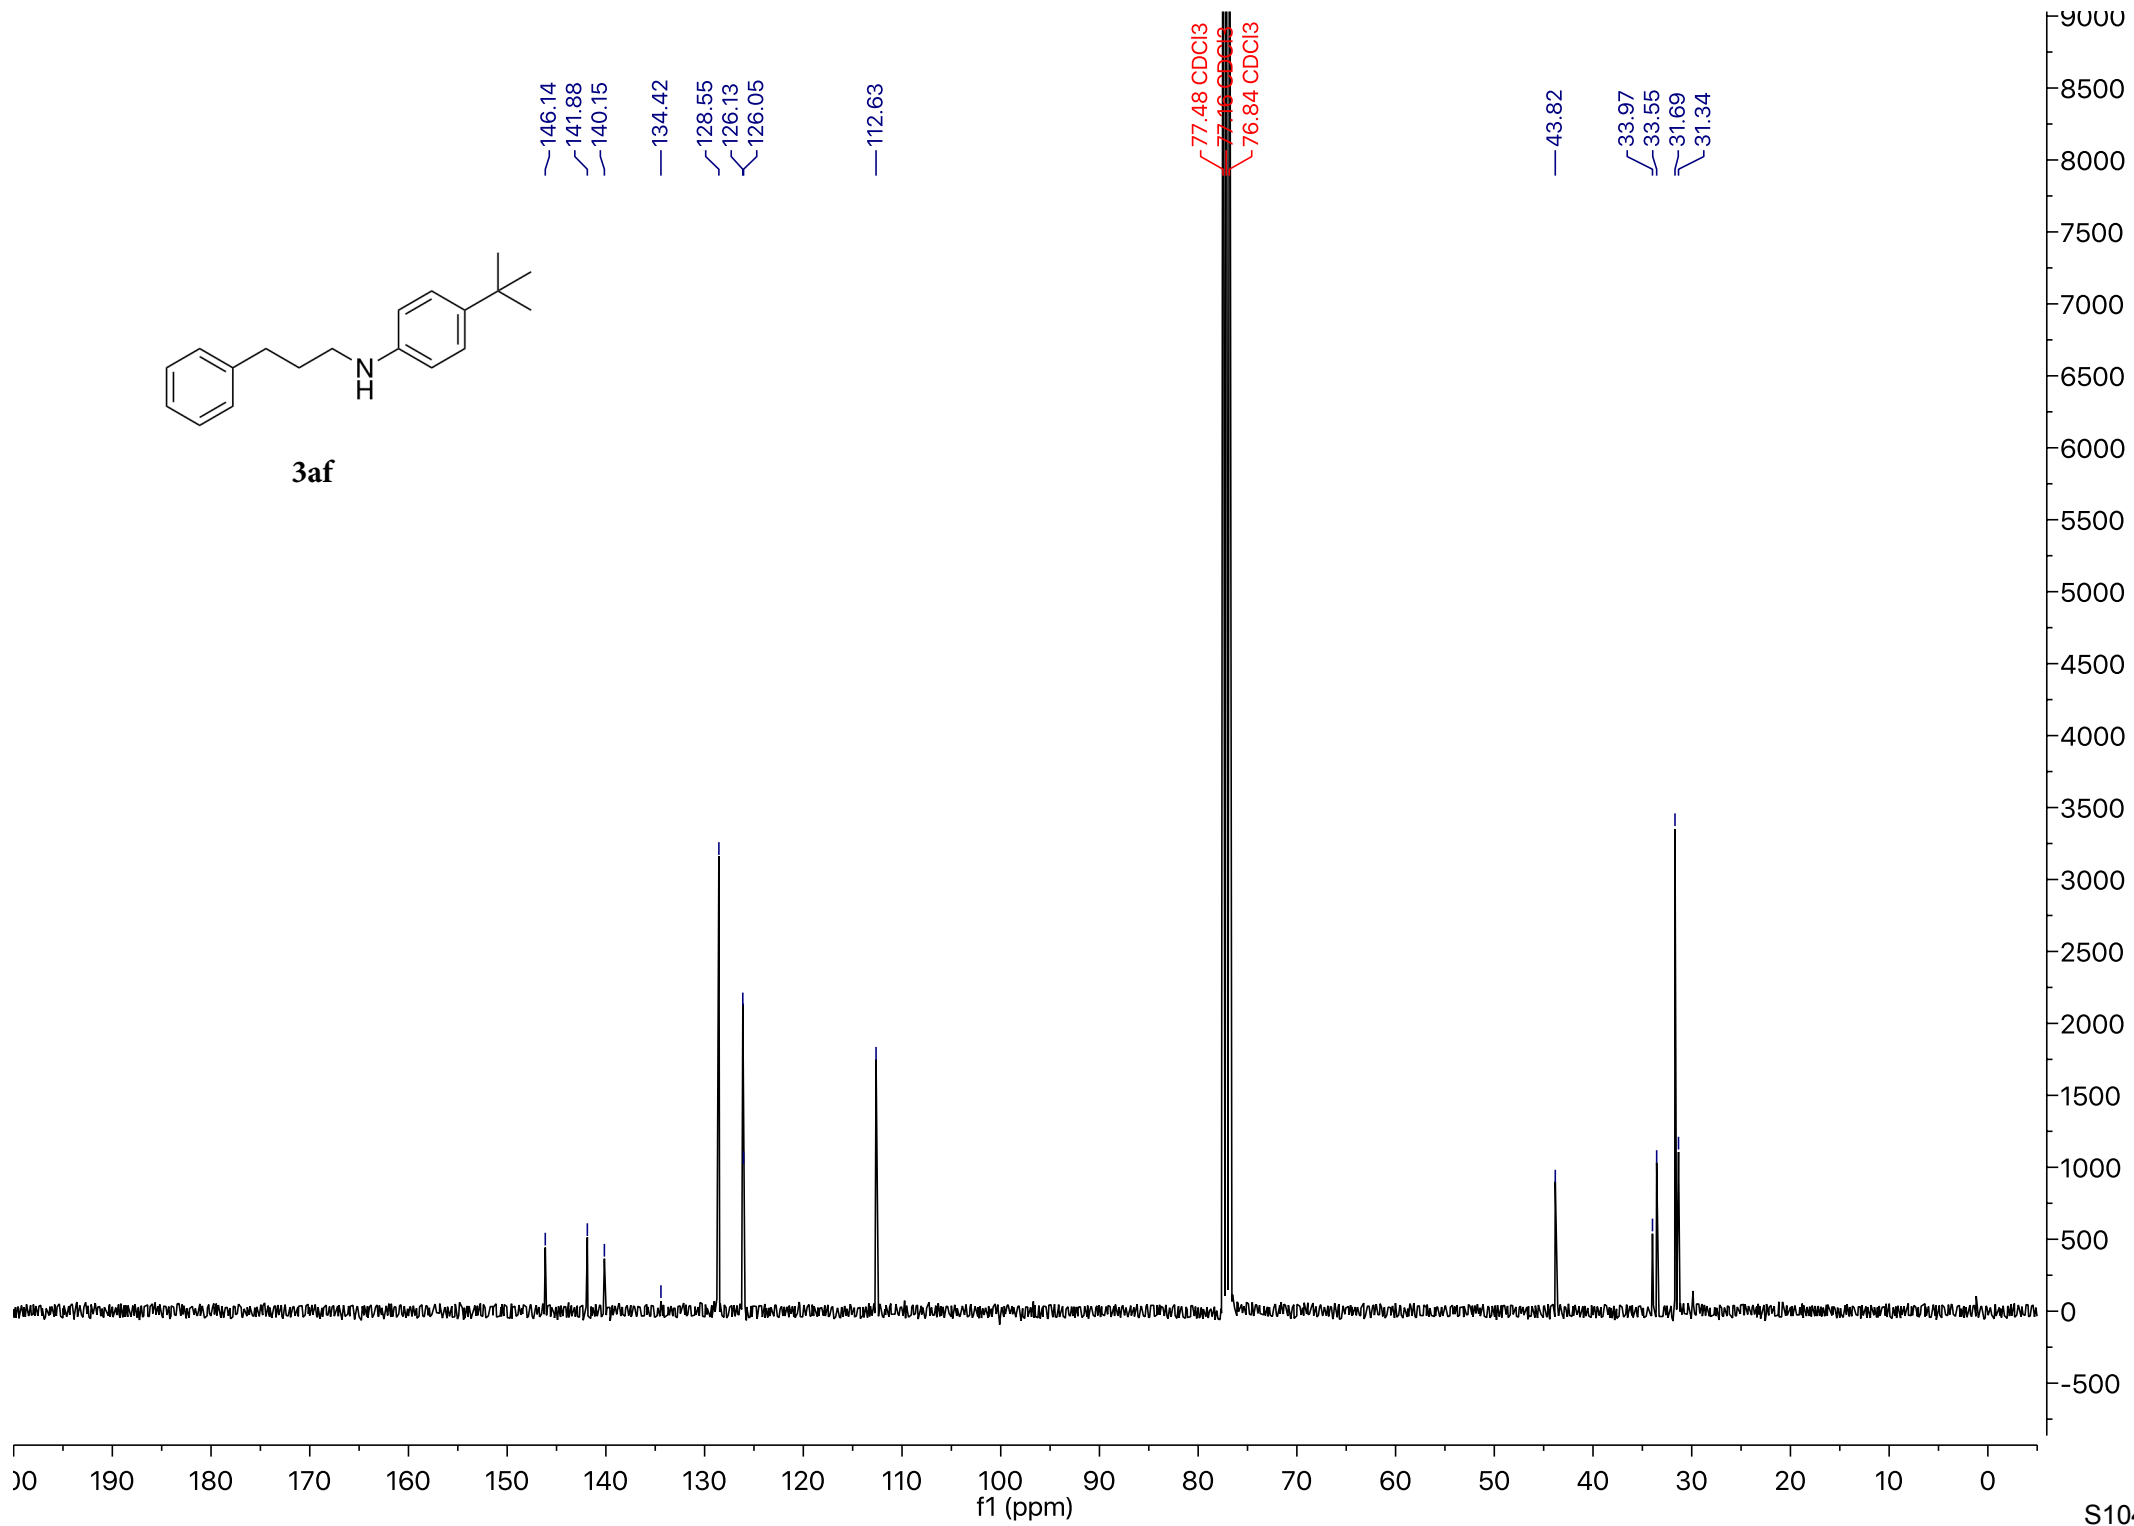

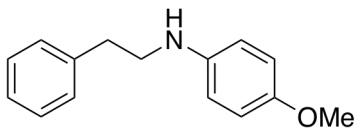

**3ag**

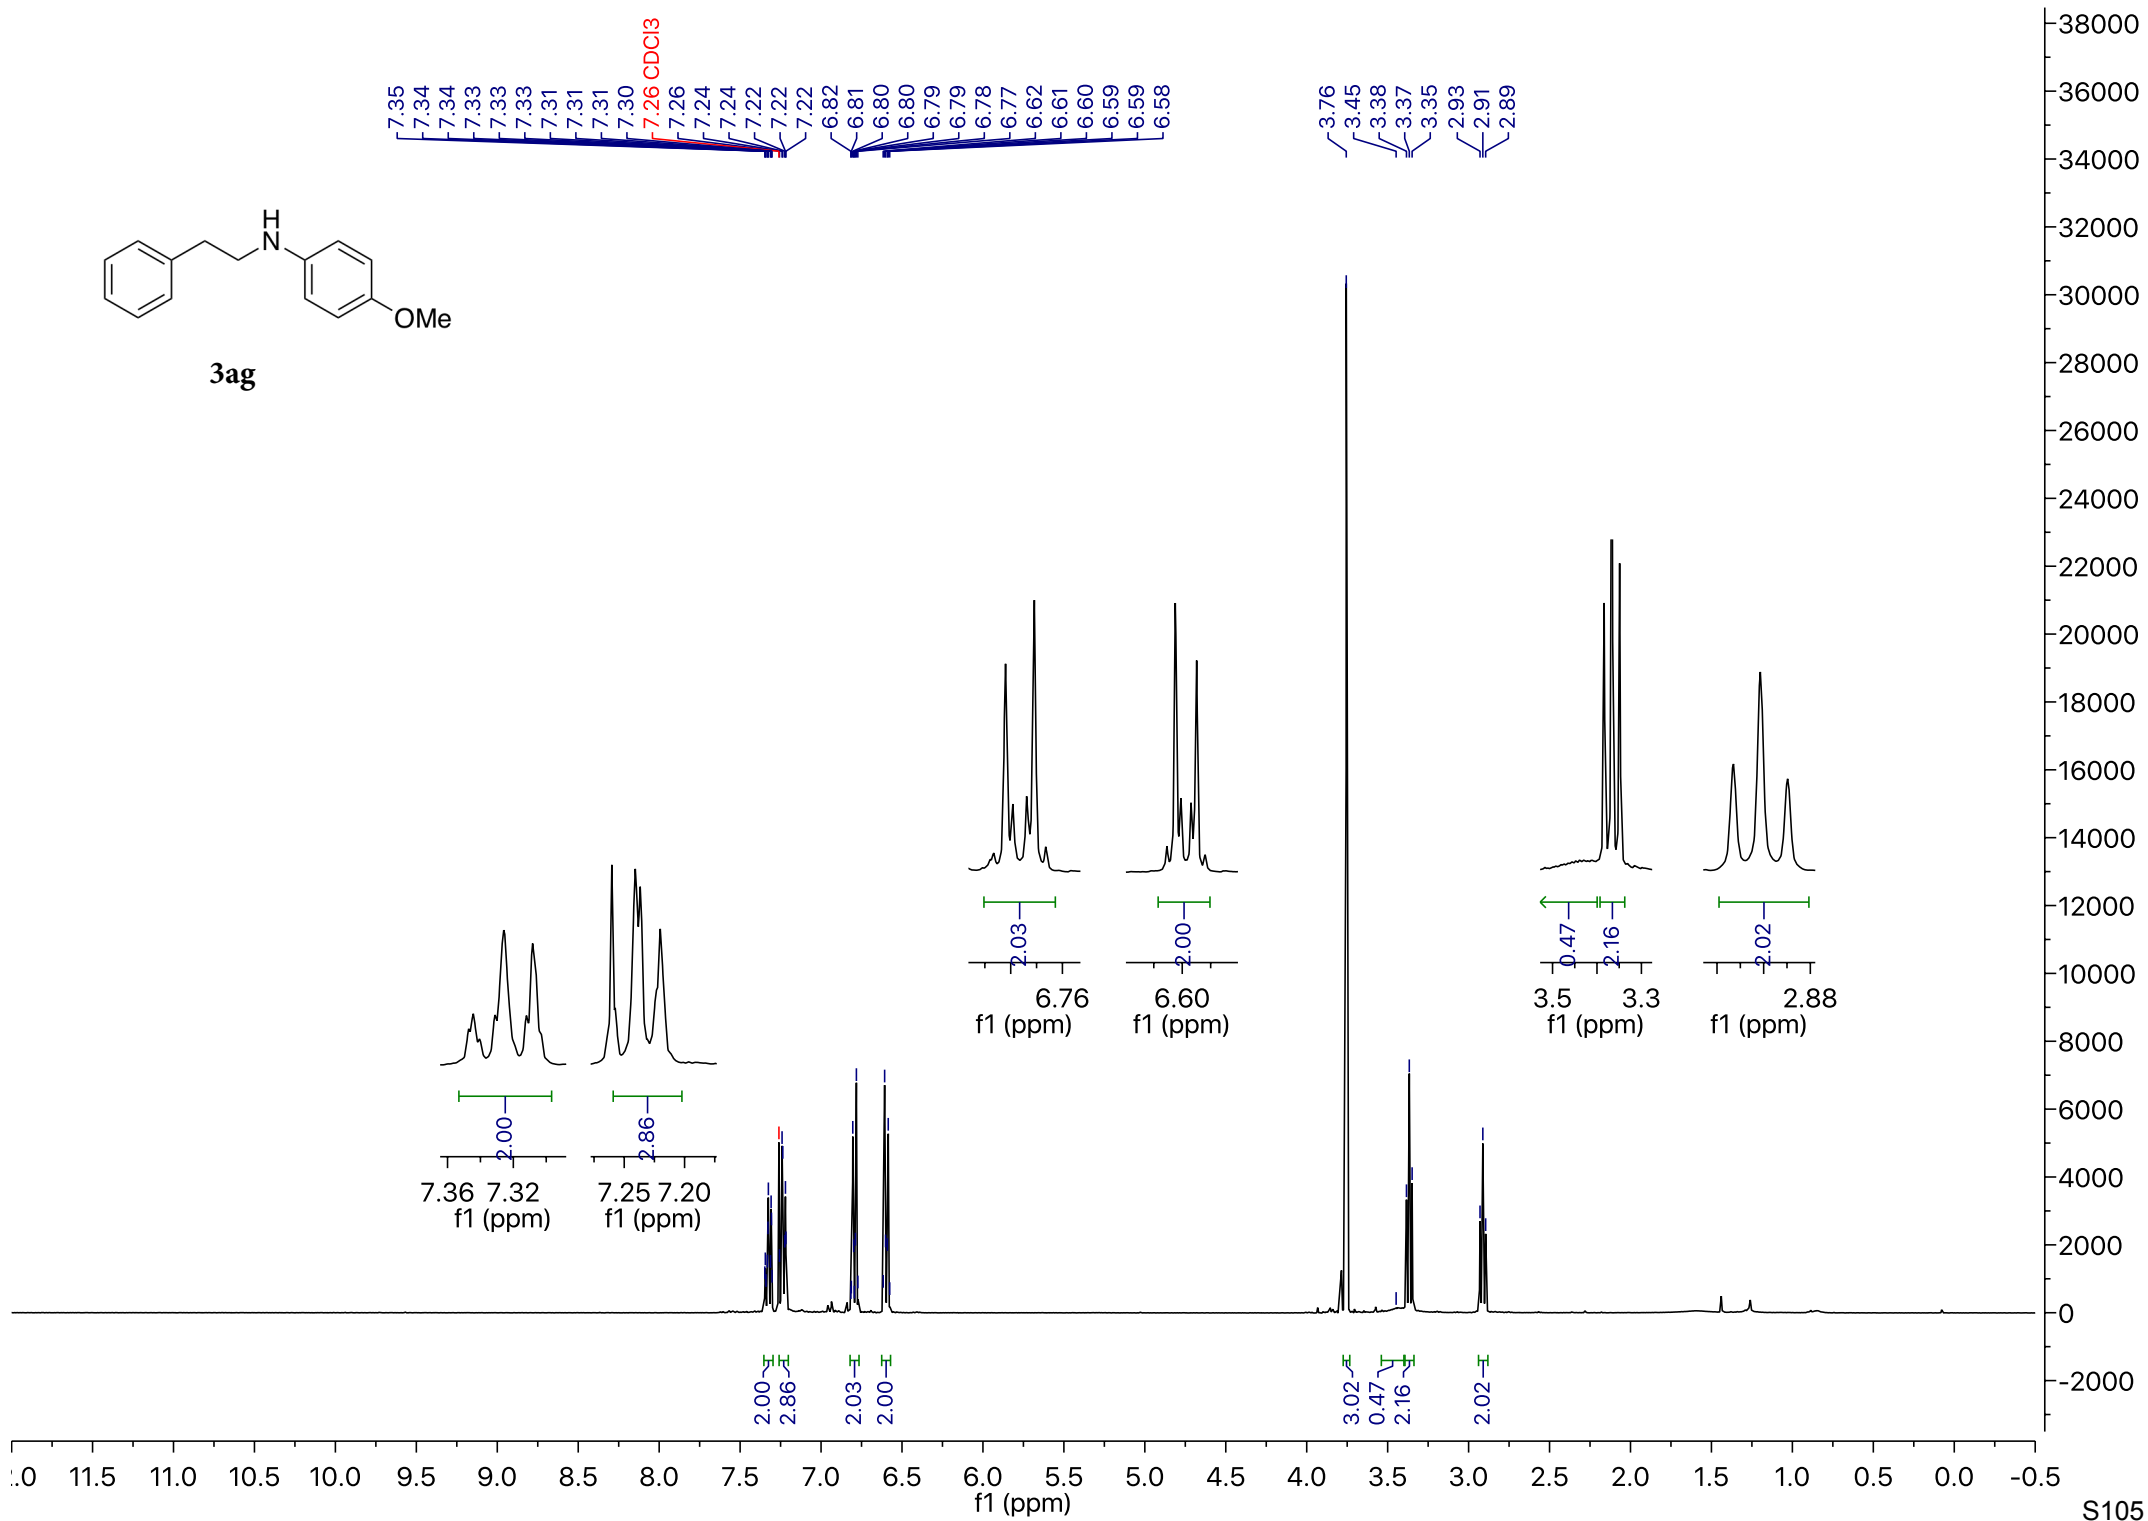

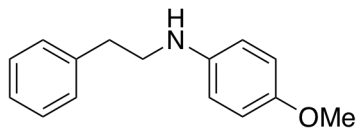

3ag

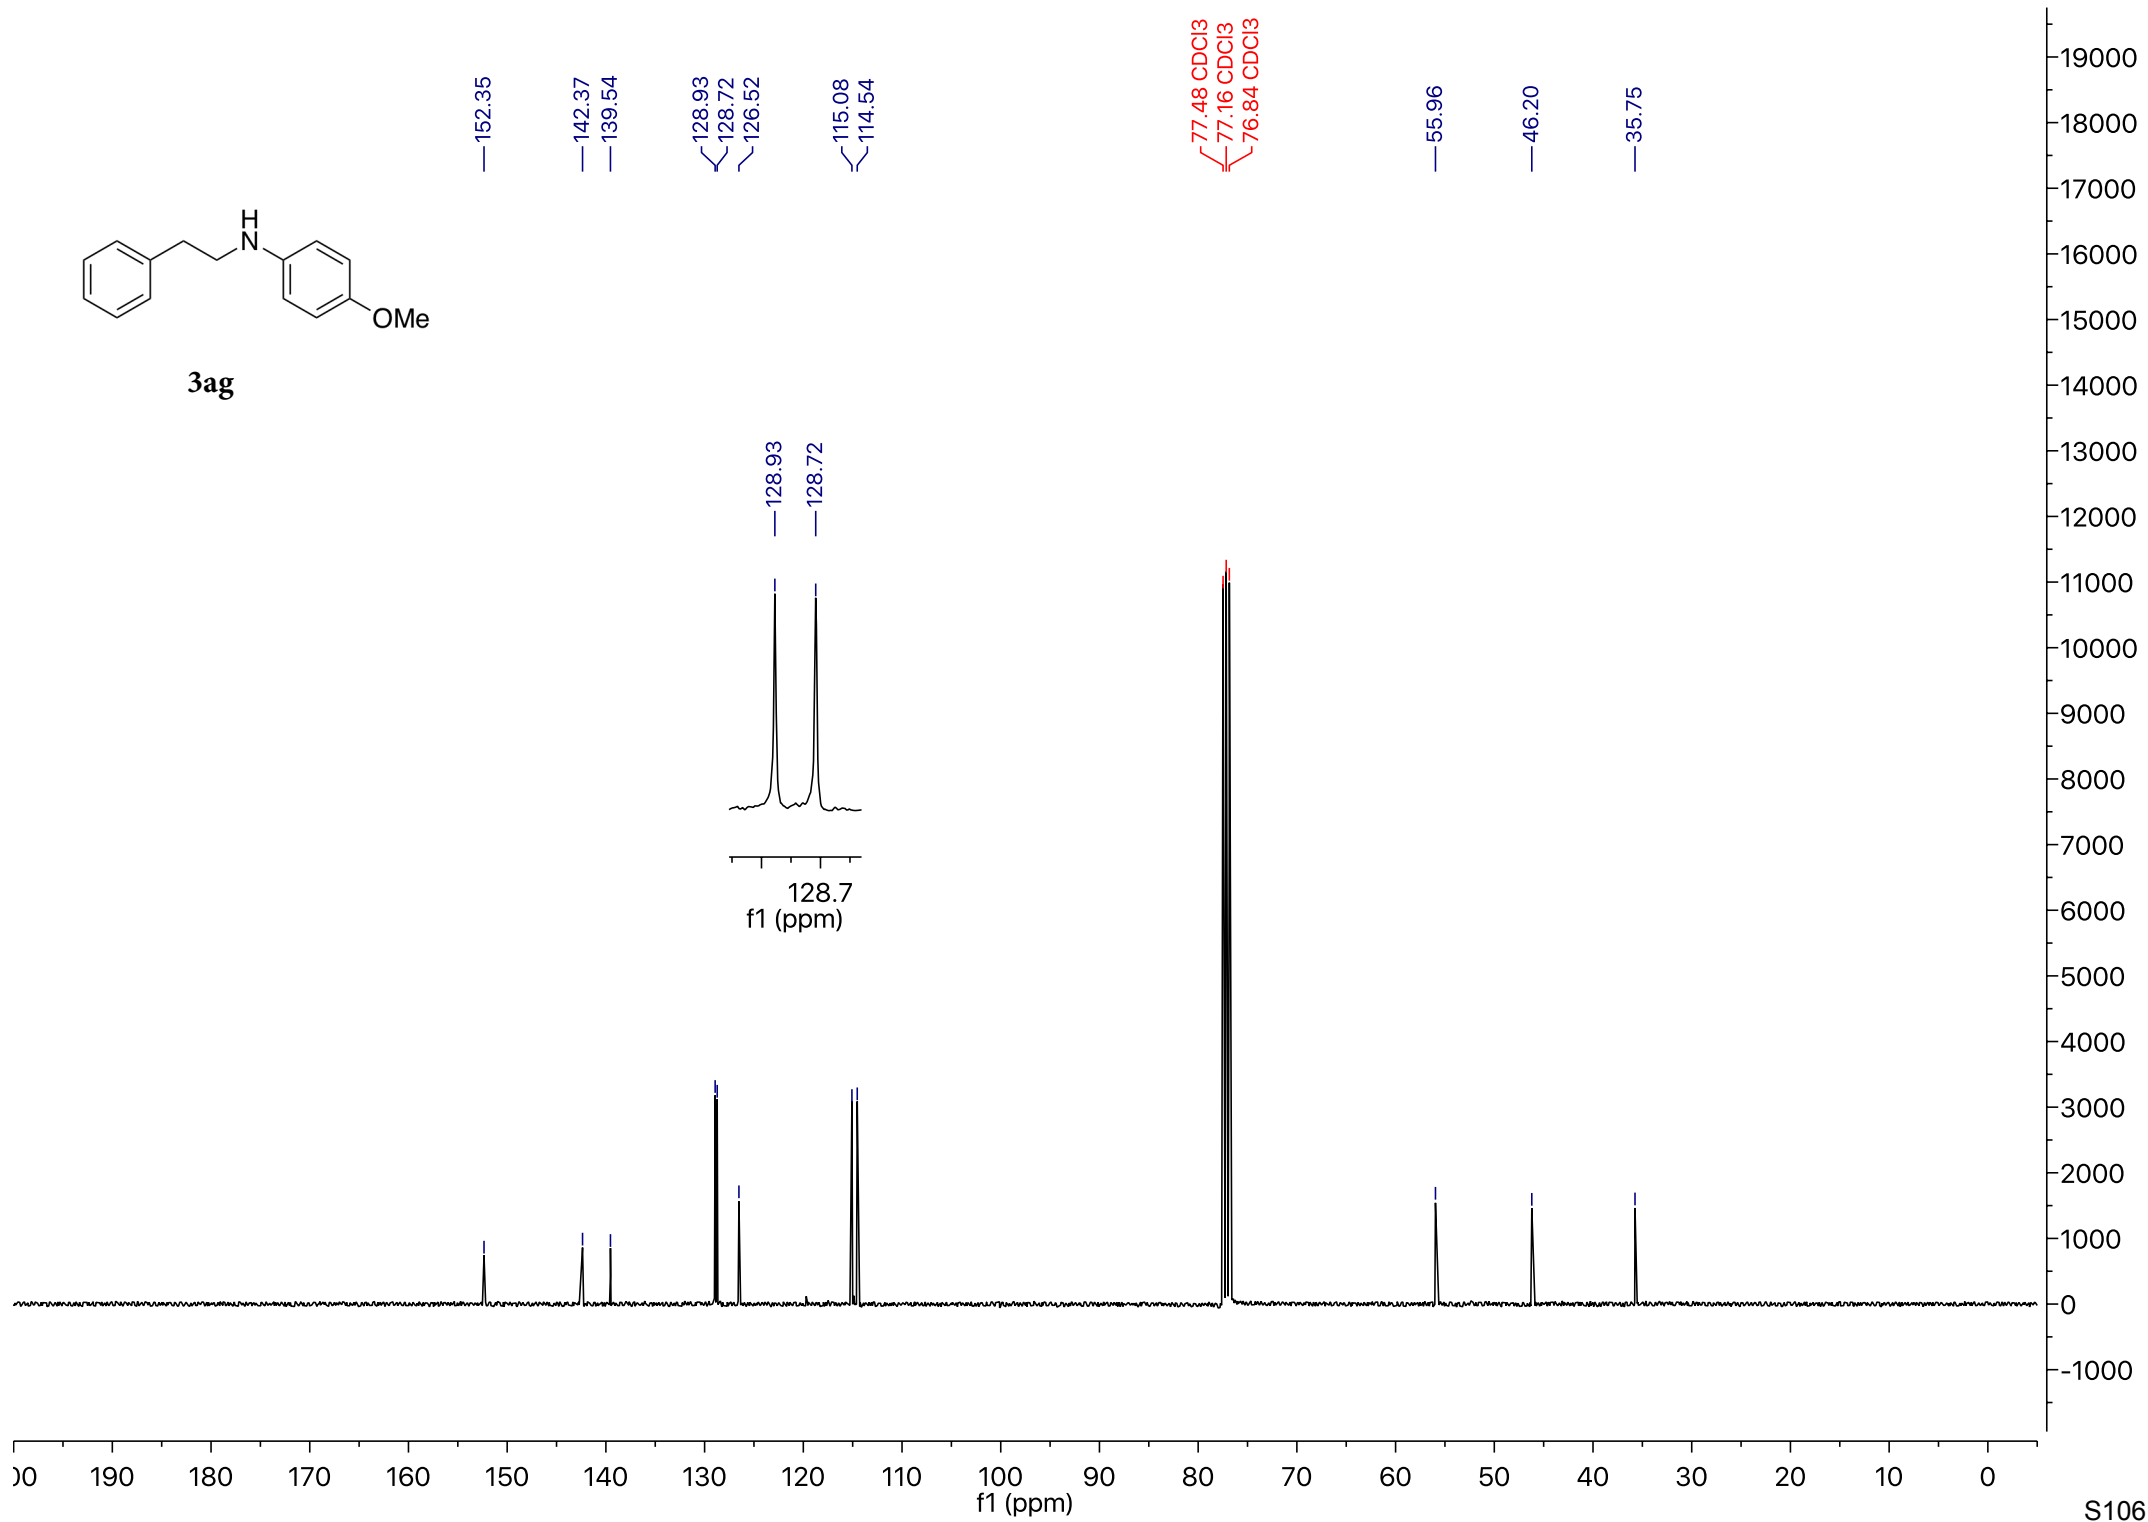

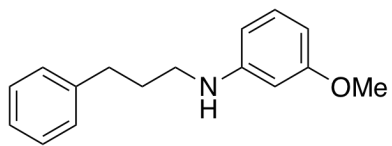

3ah

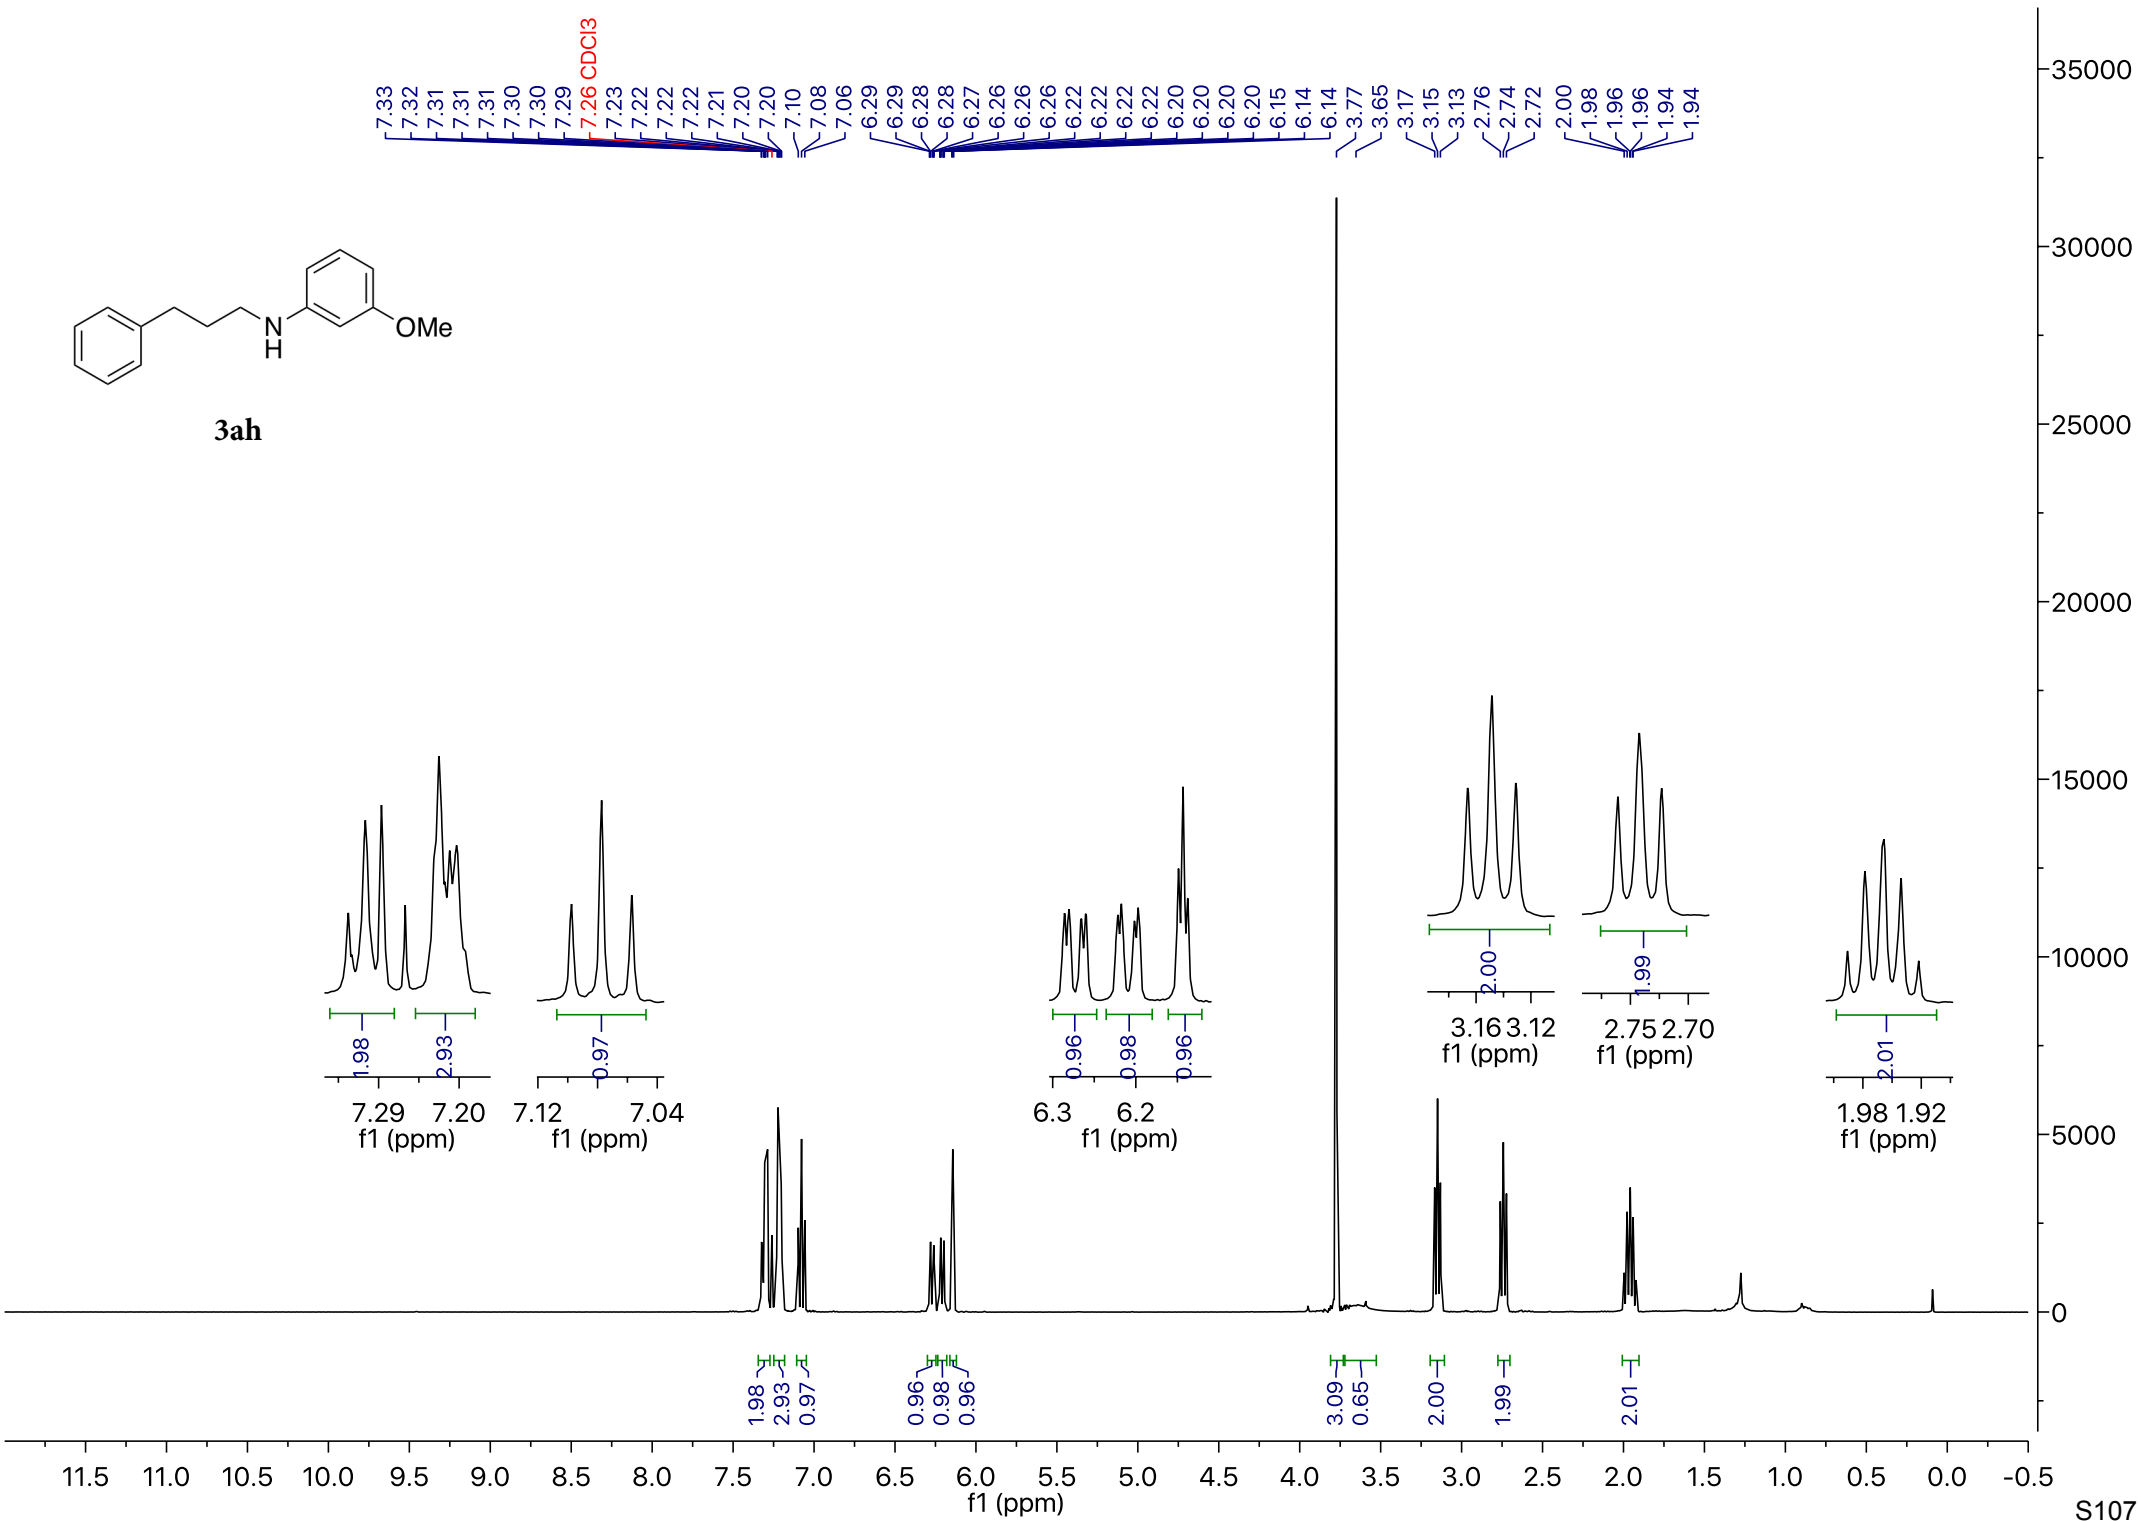



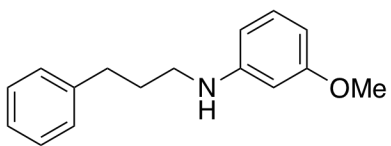

3ah

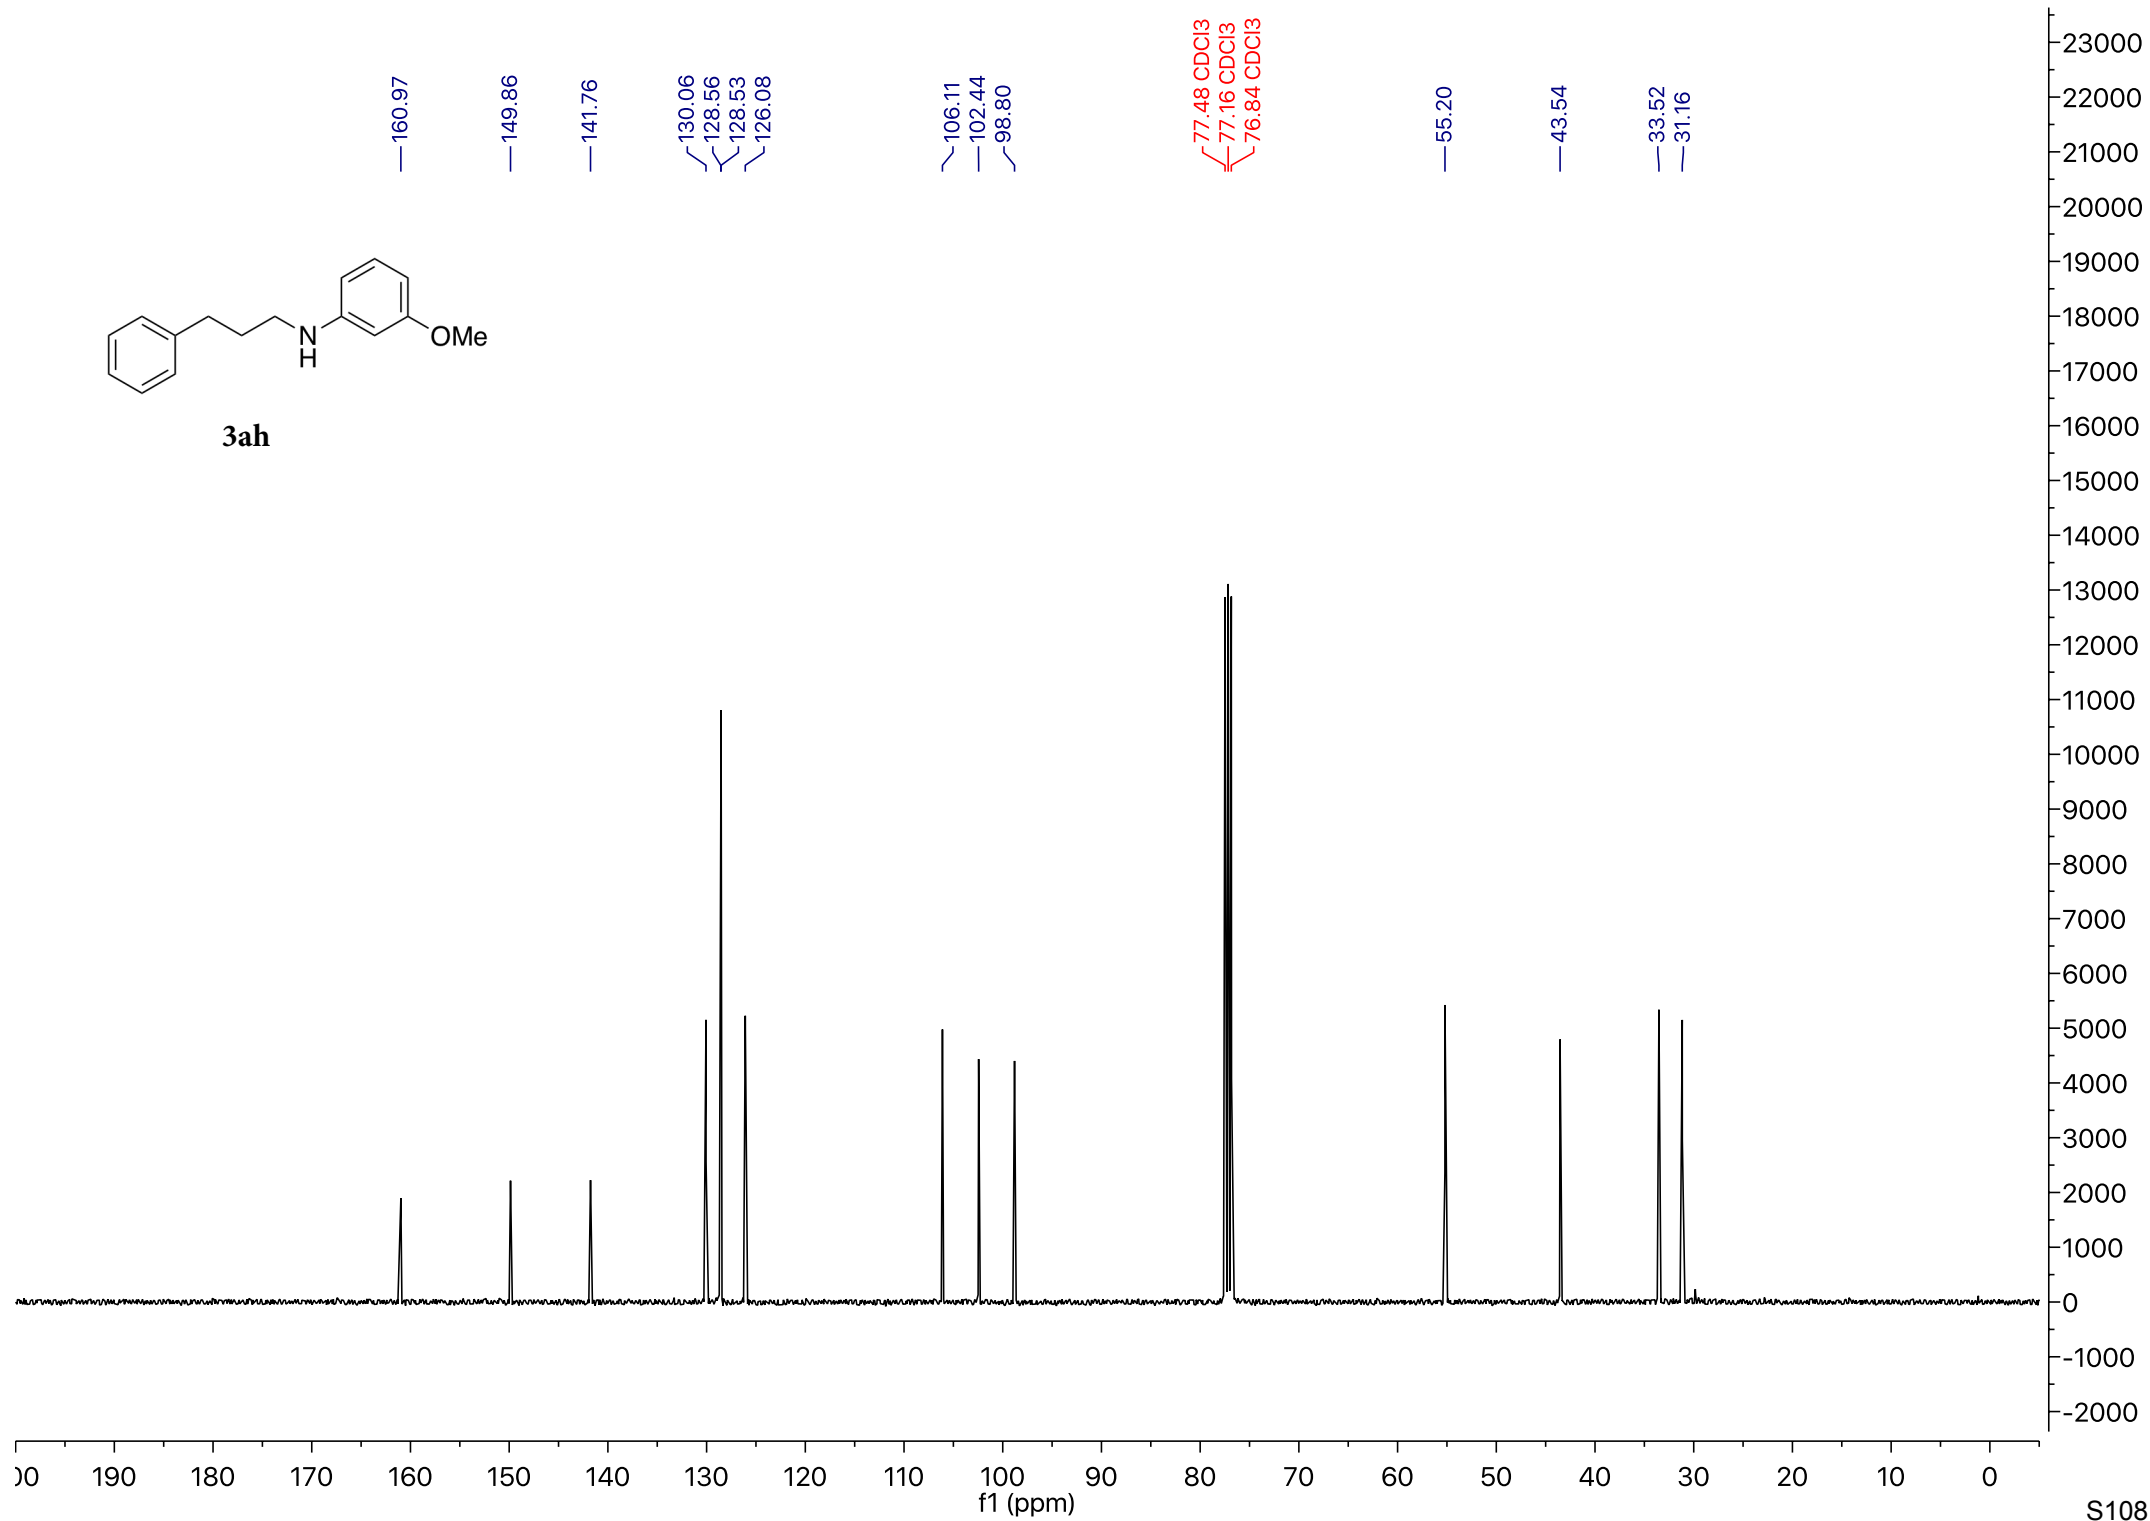

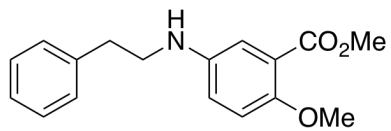

**3ai**

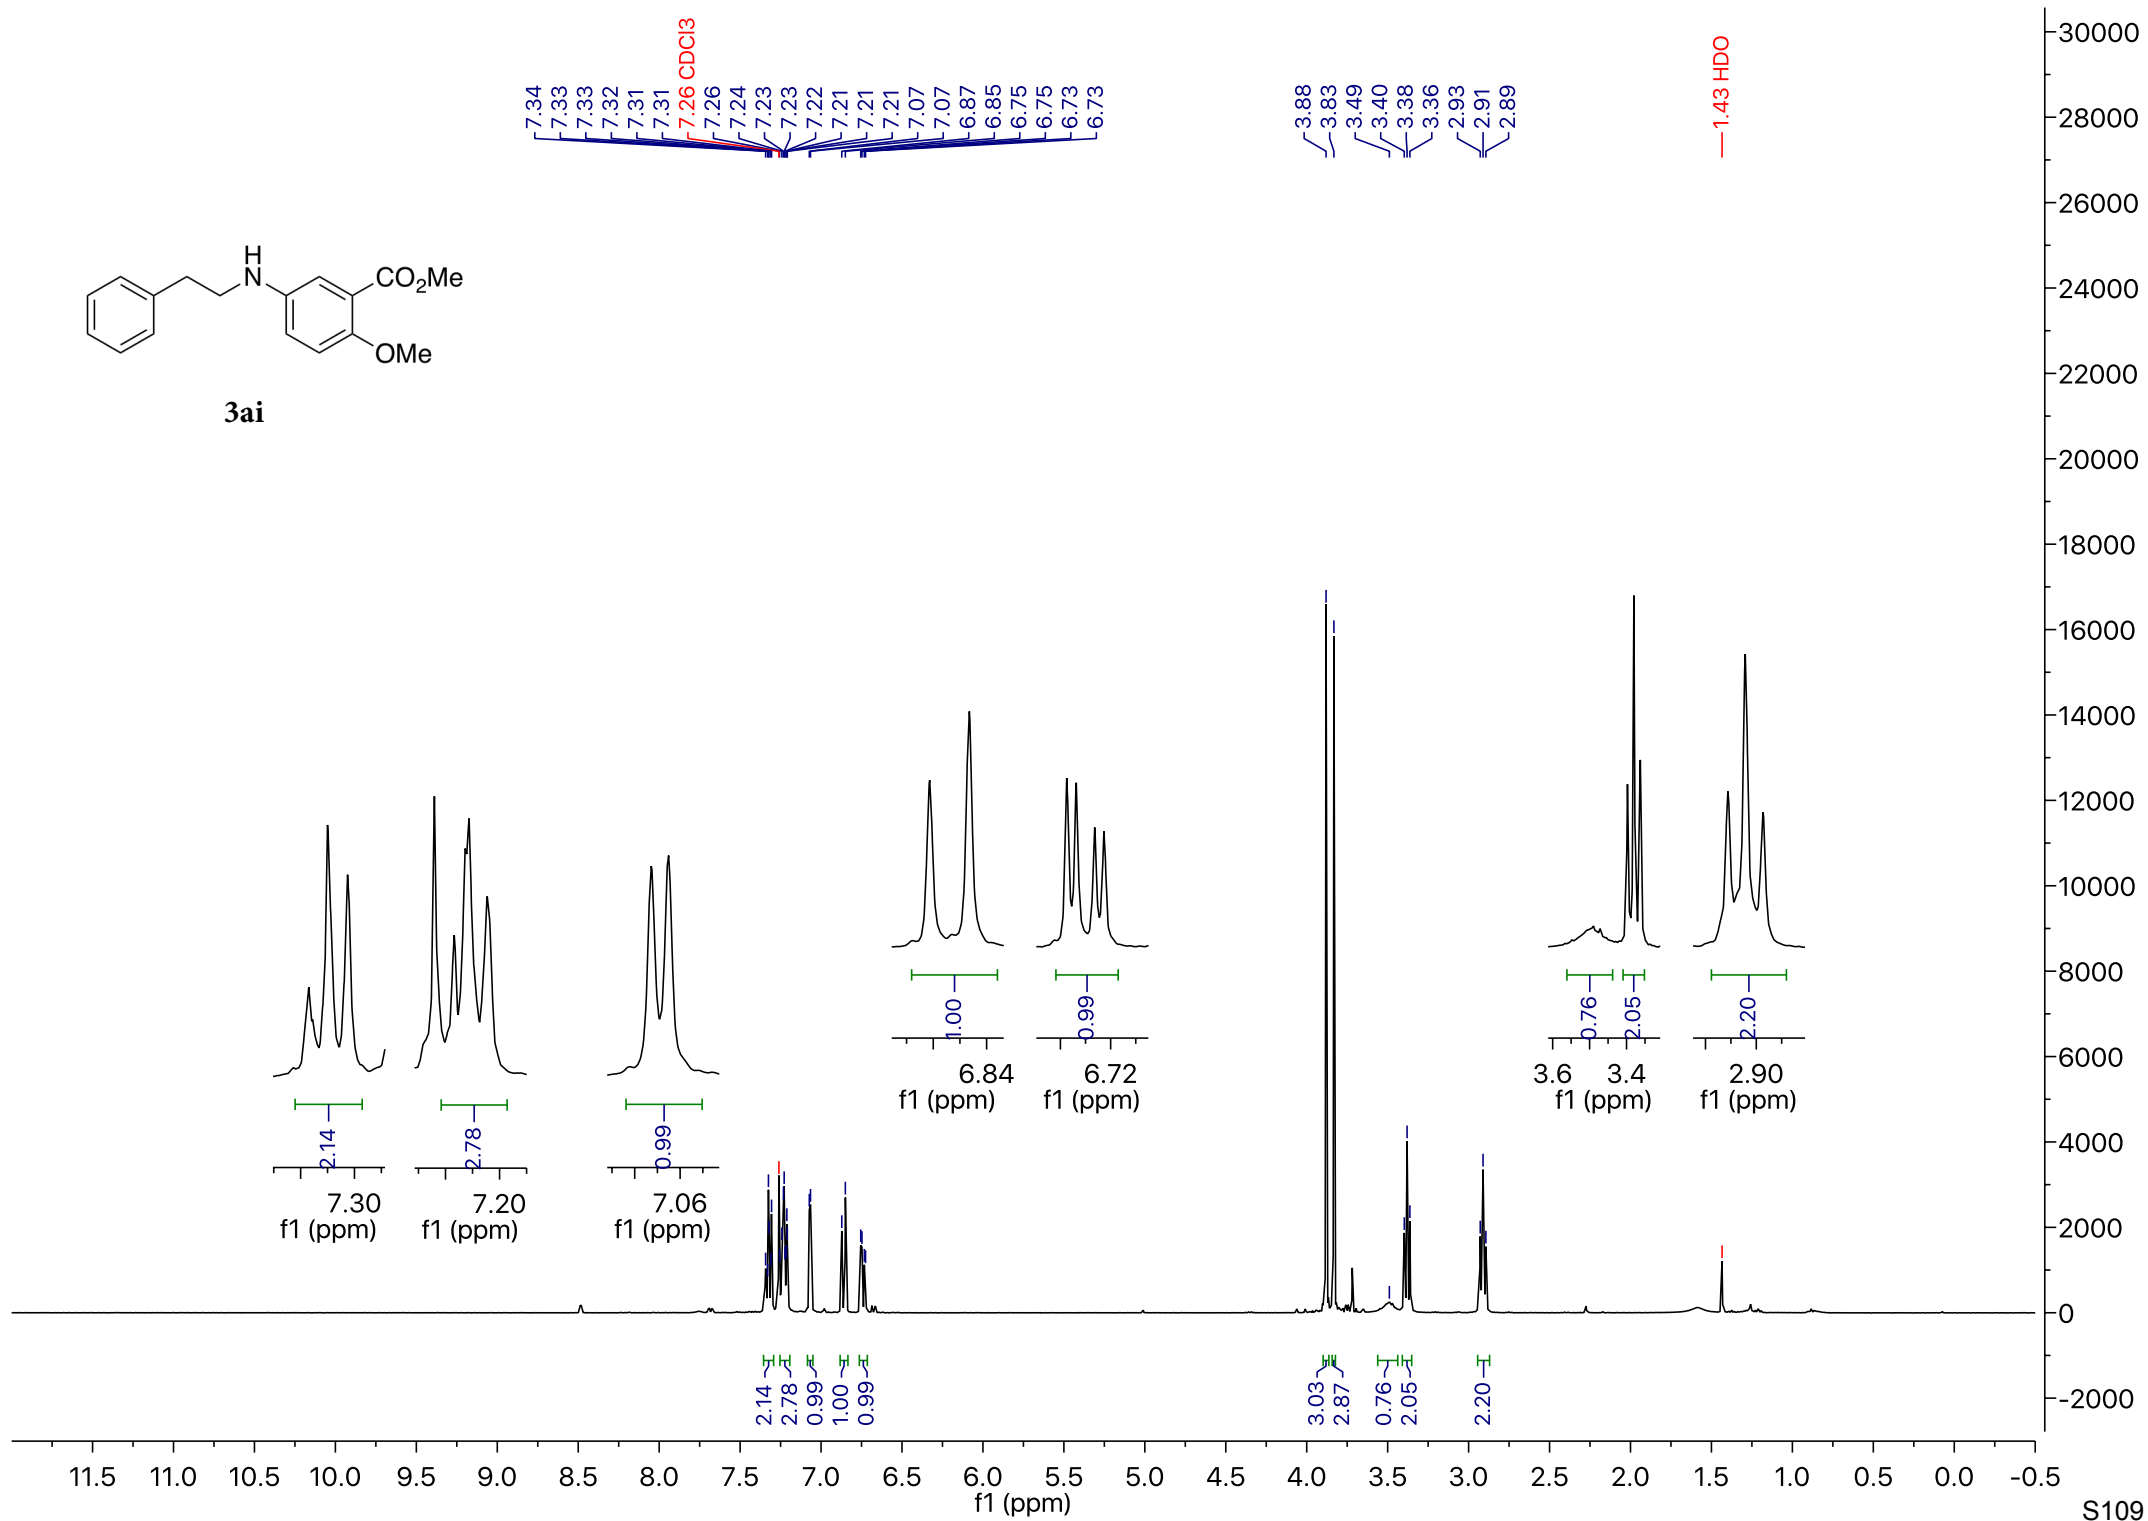

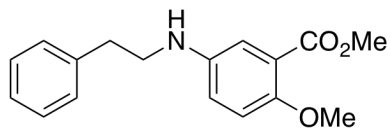

3ai

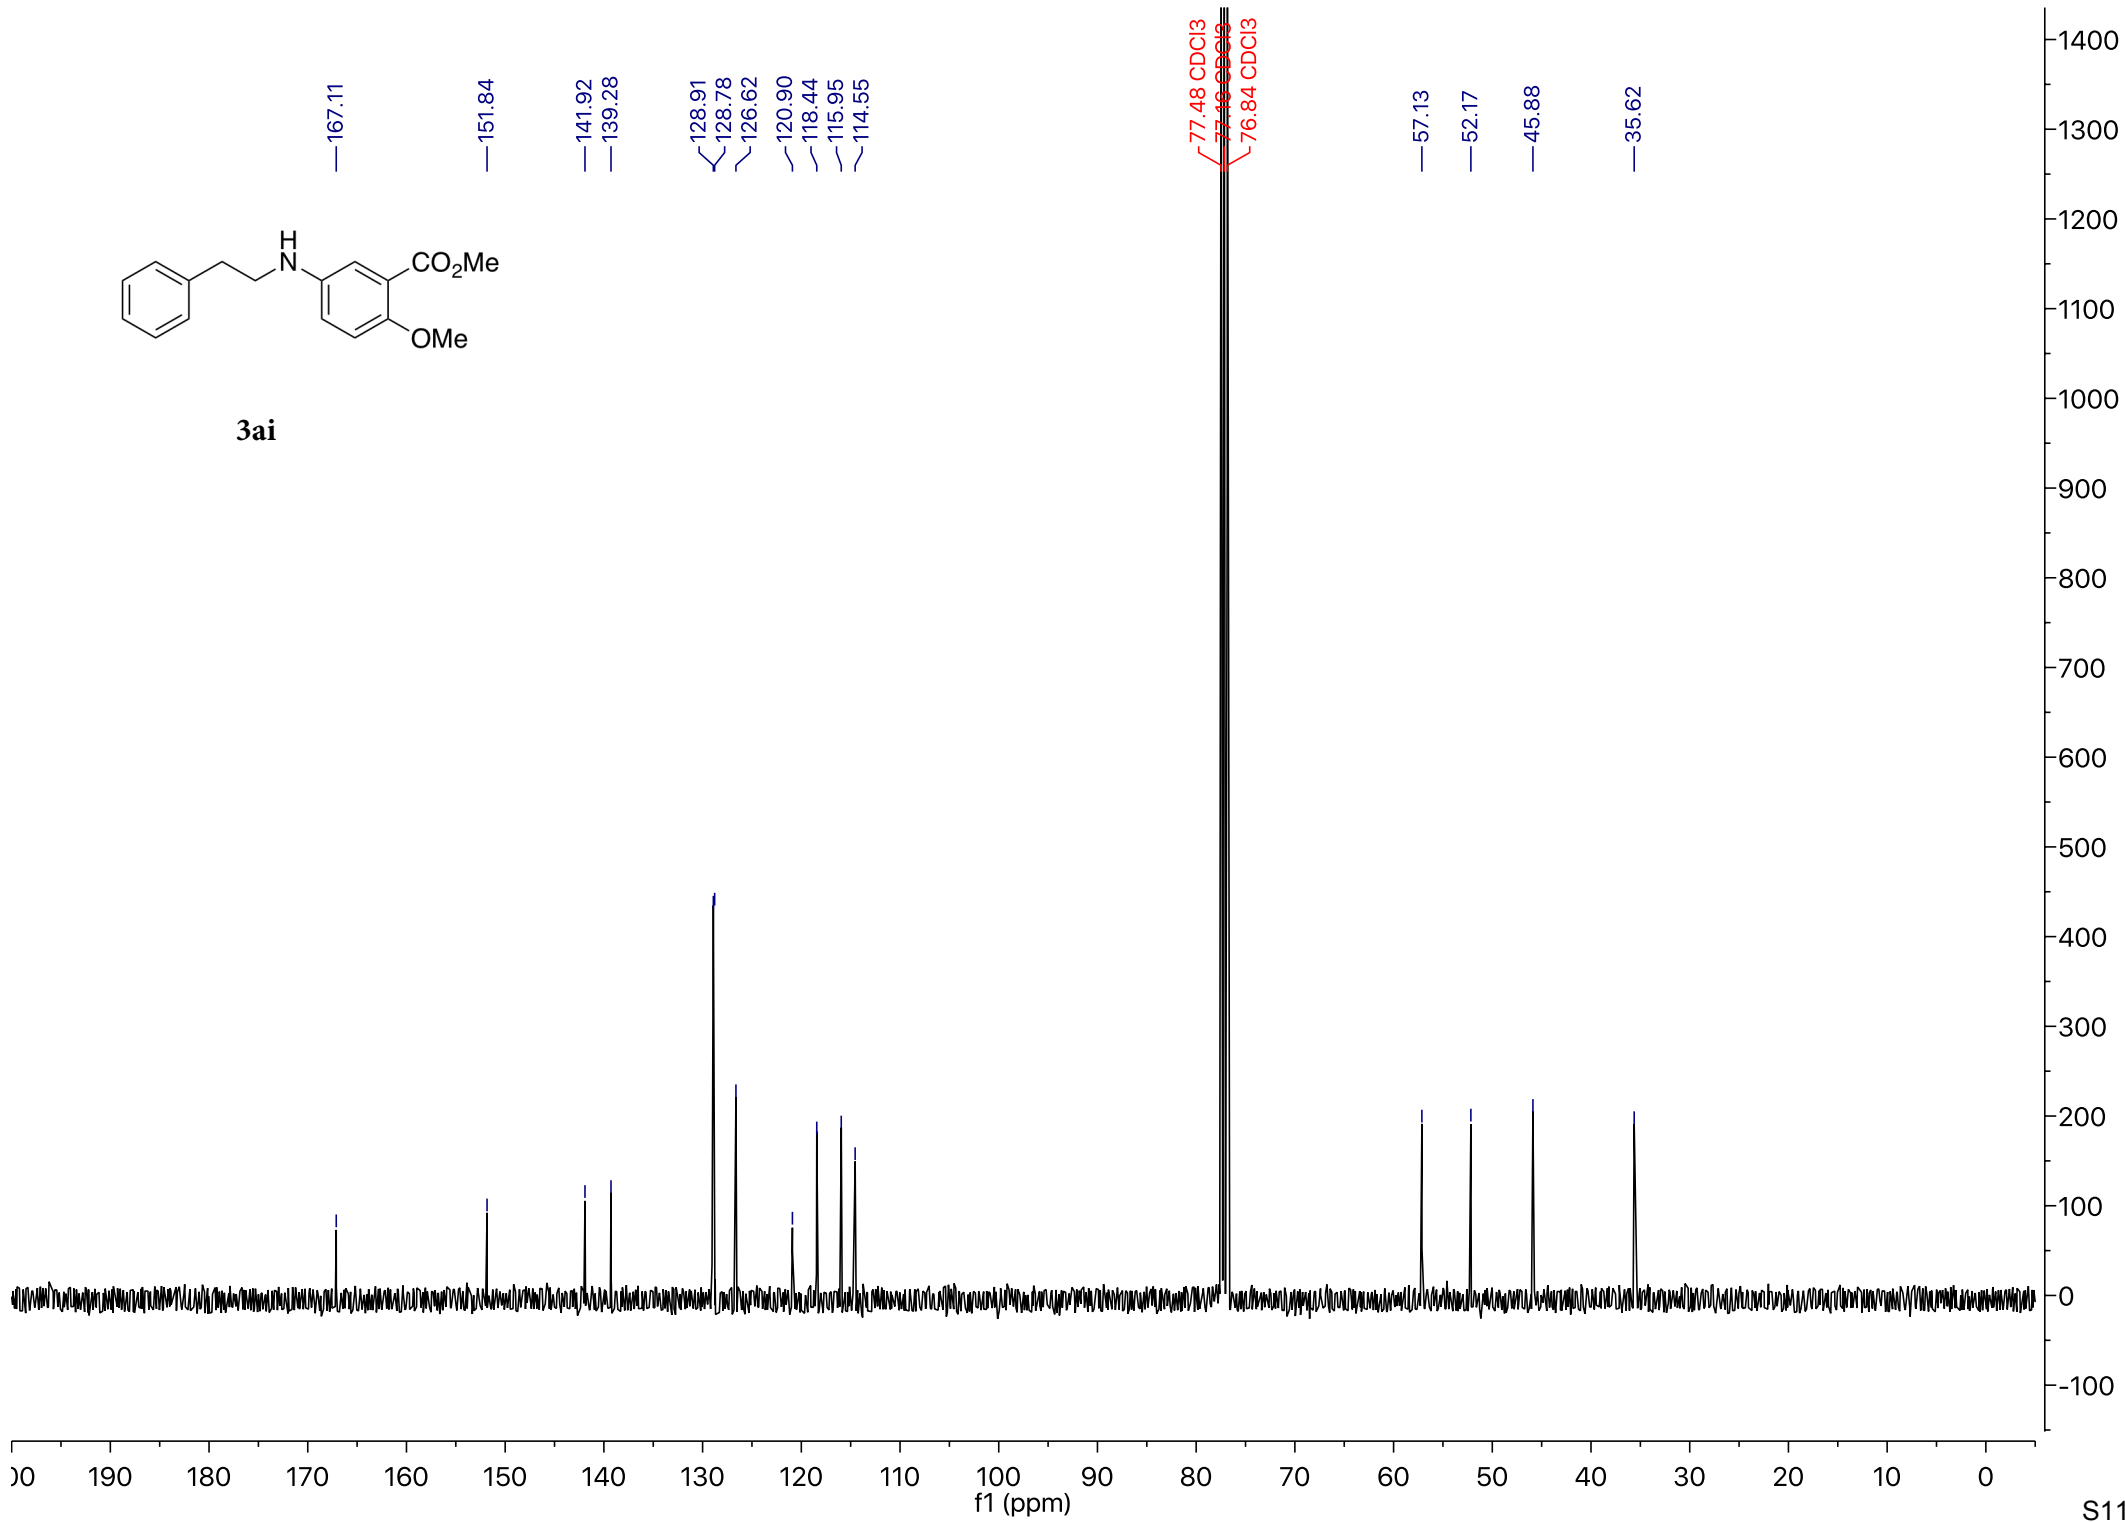

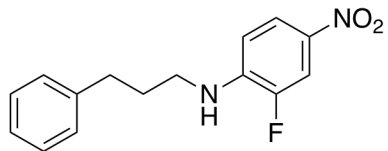

3aj

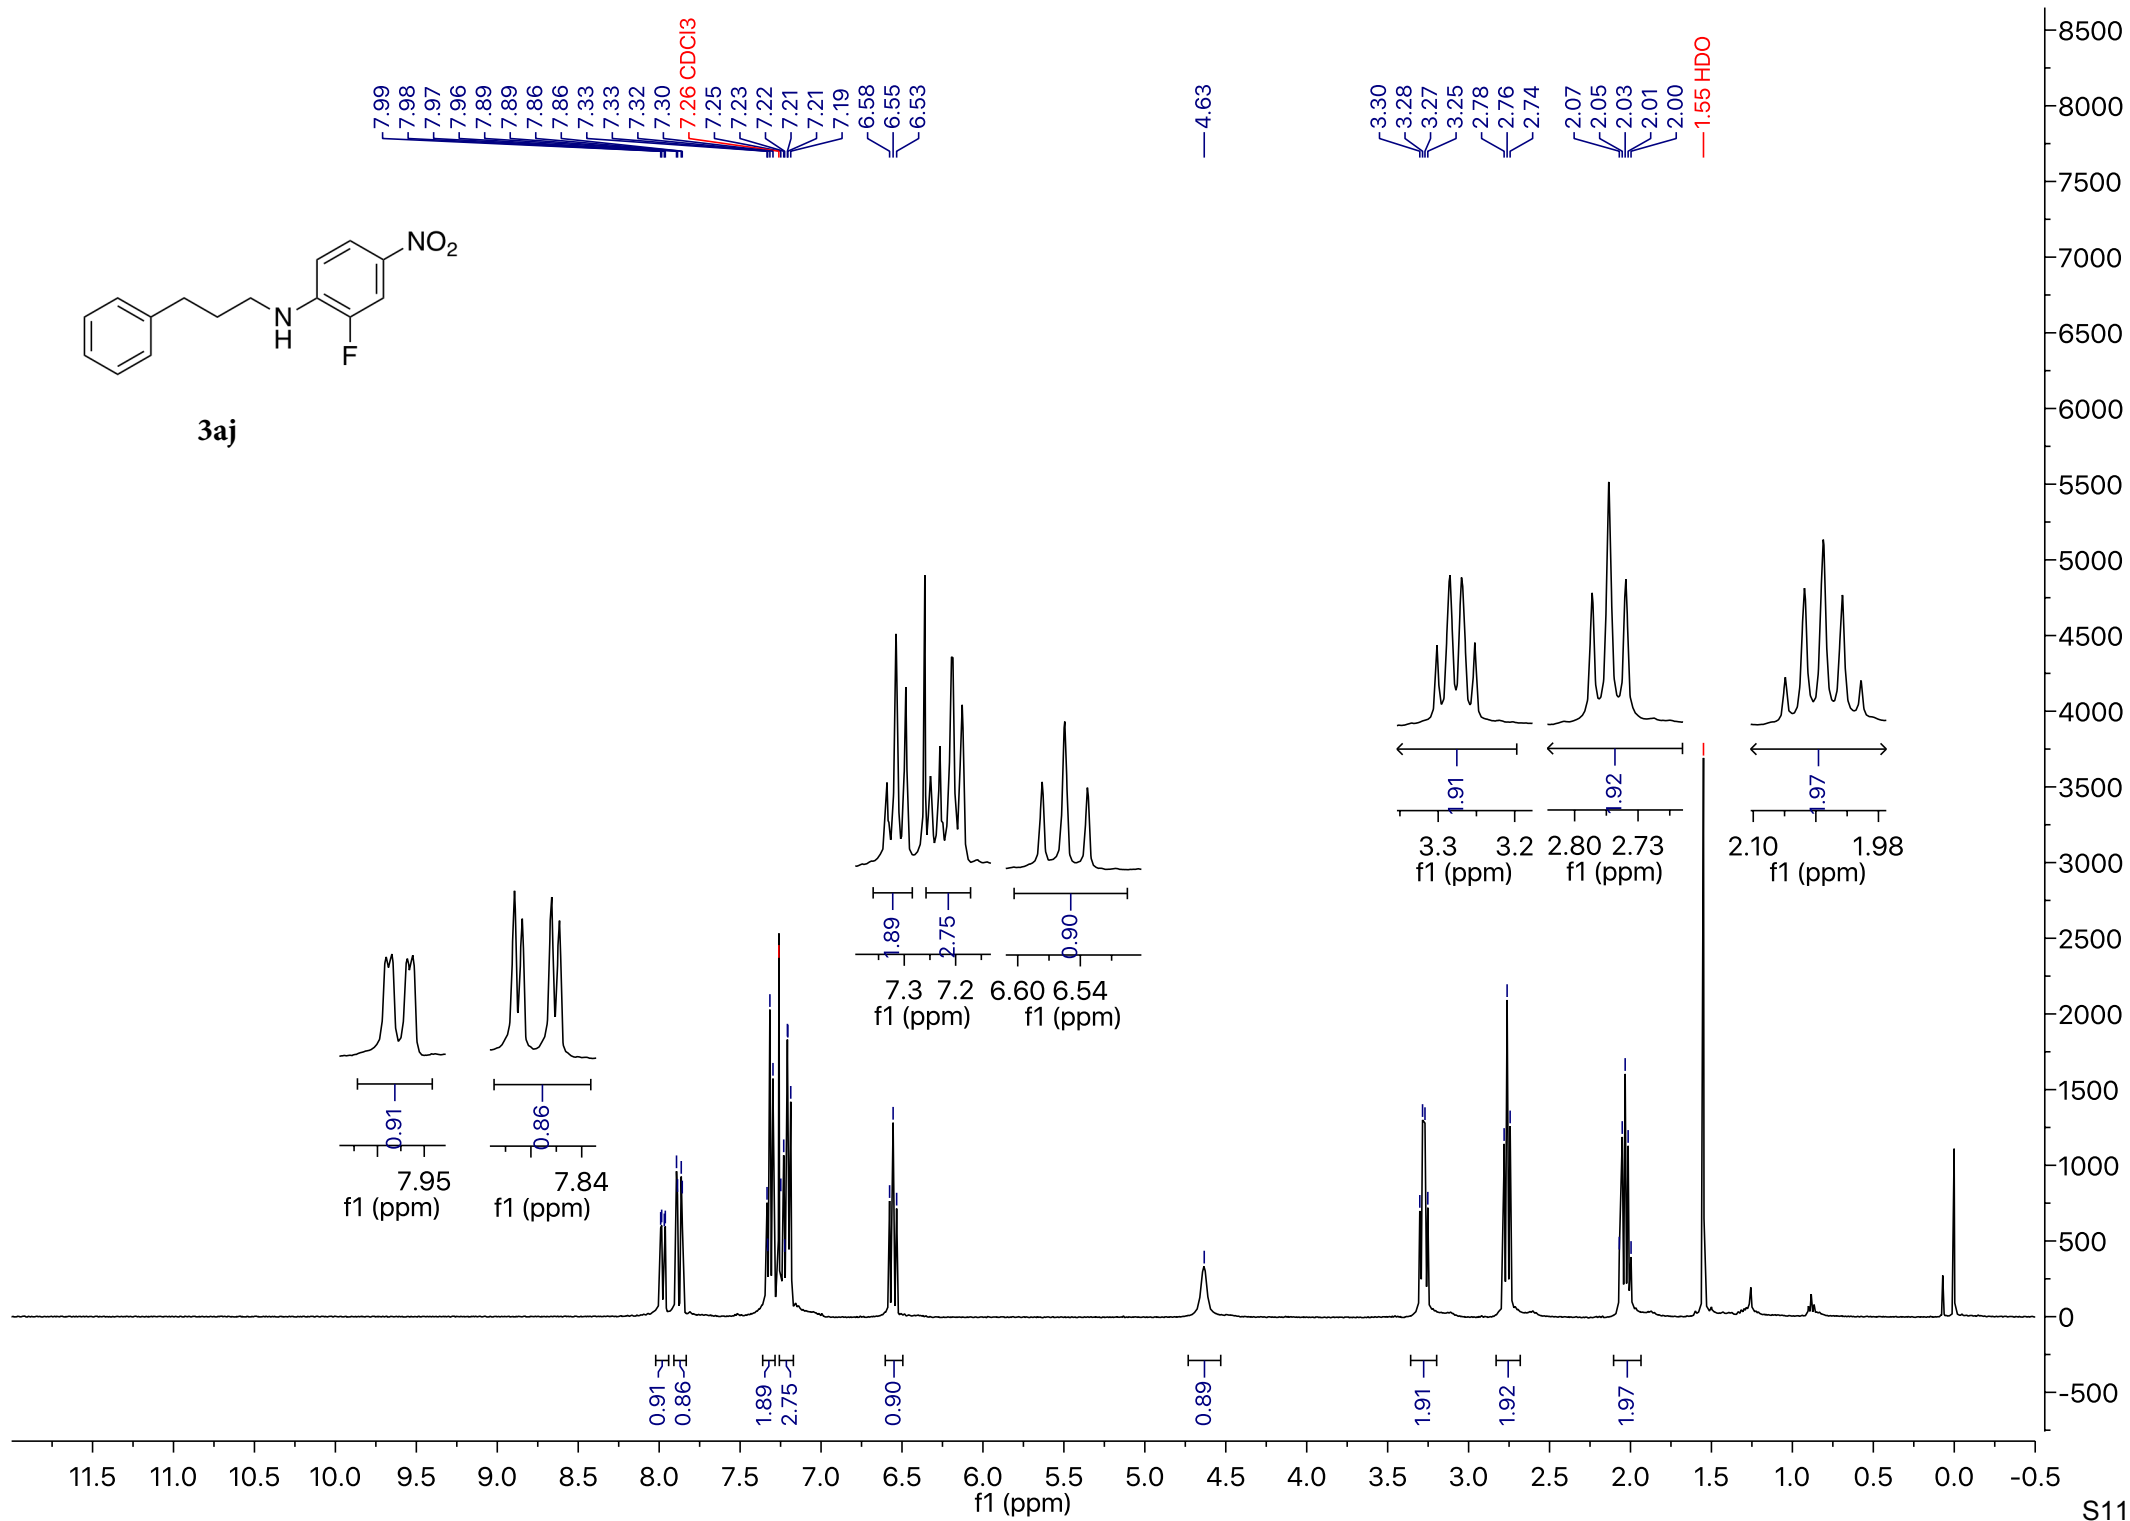

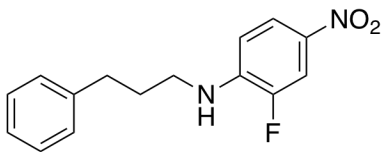

3aj

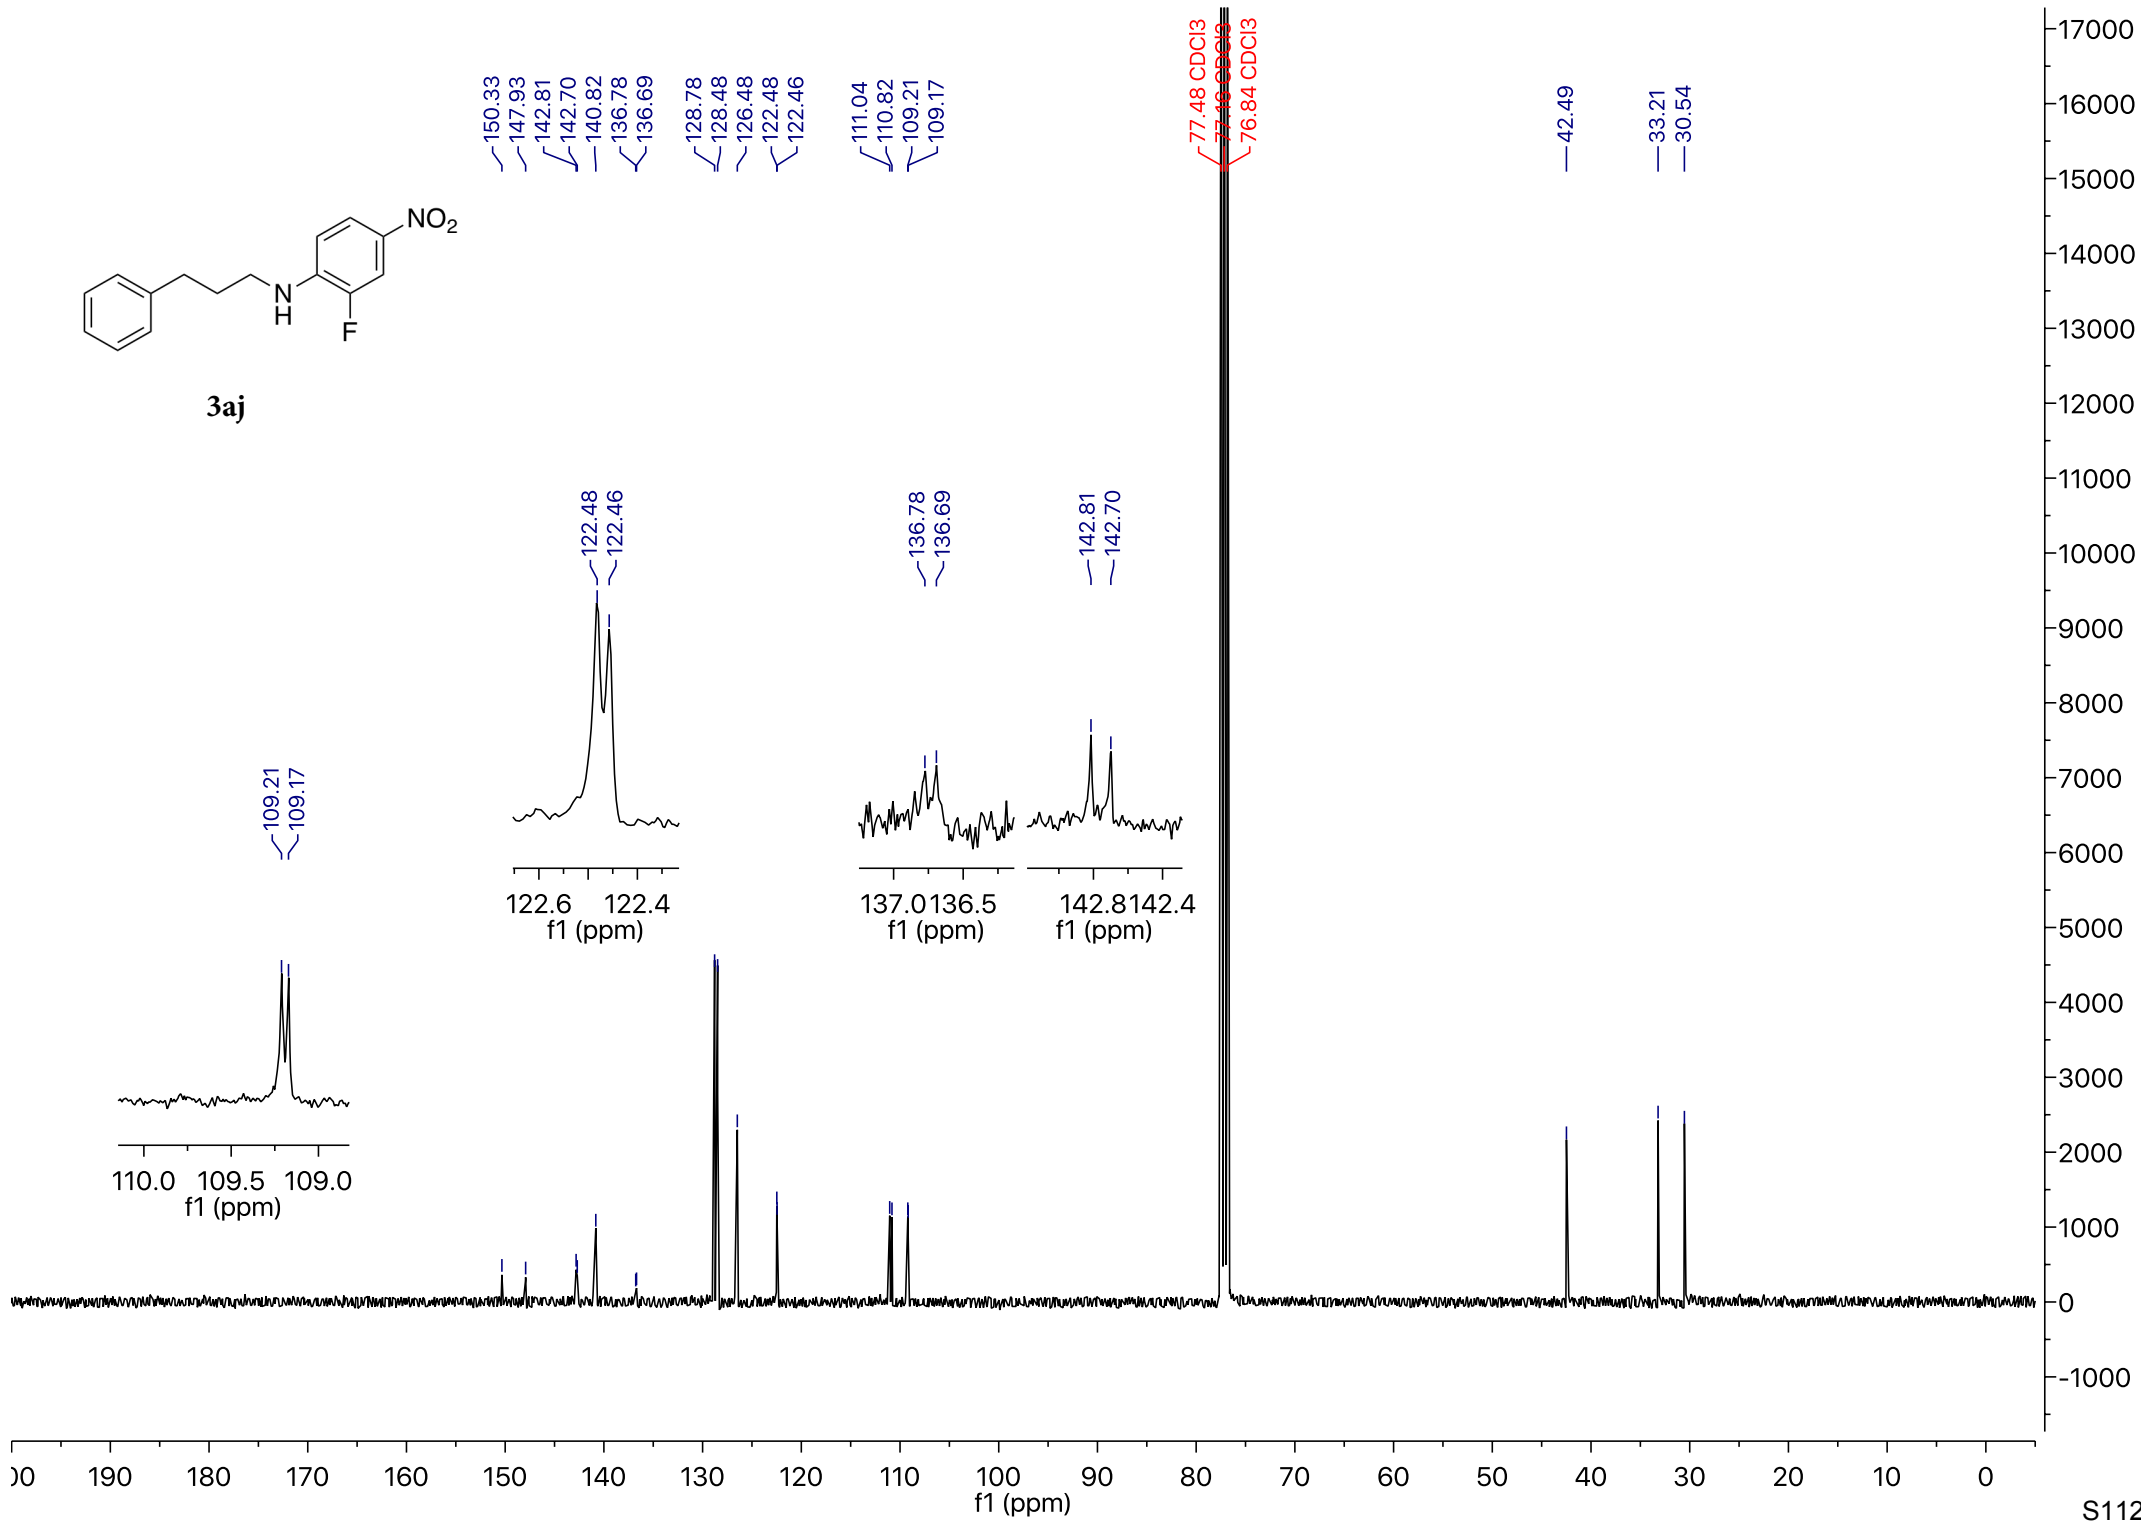

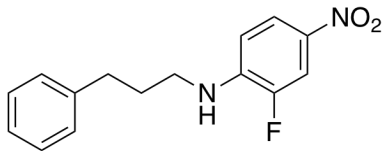

**3aj**

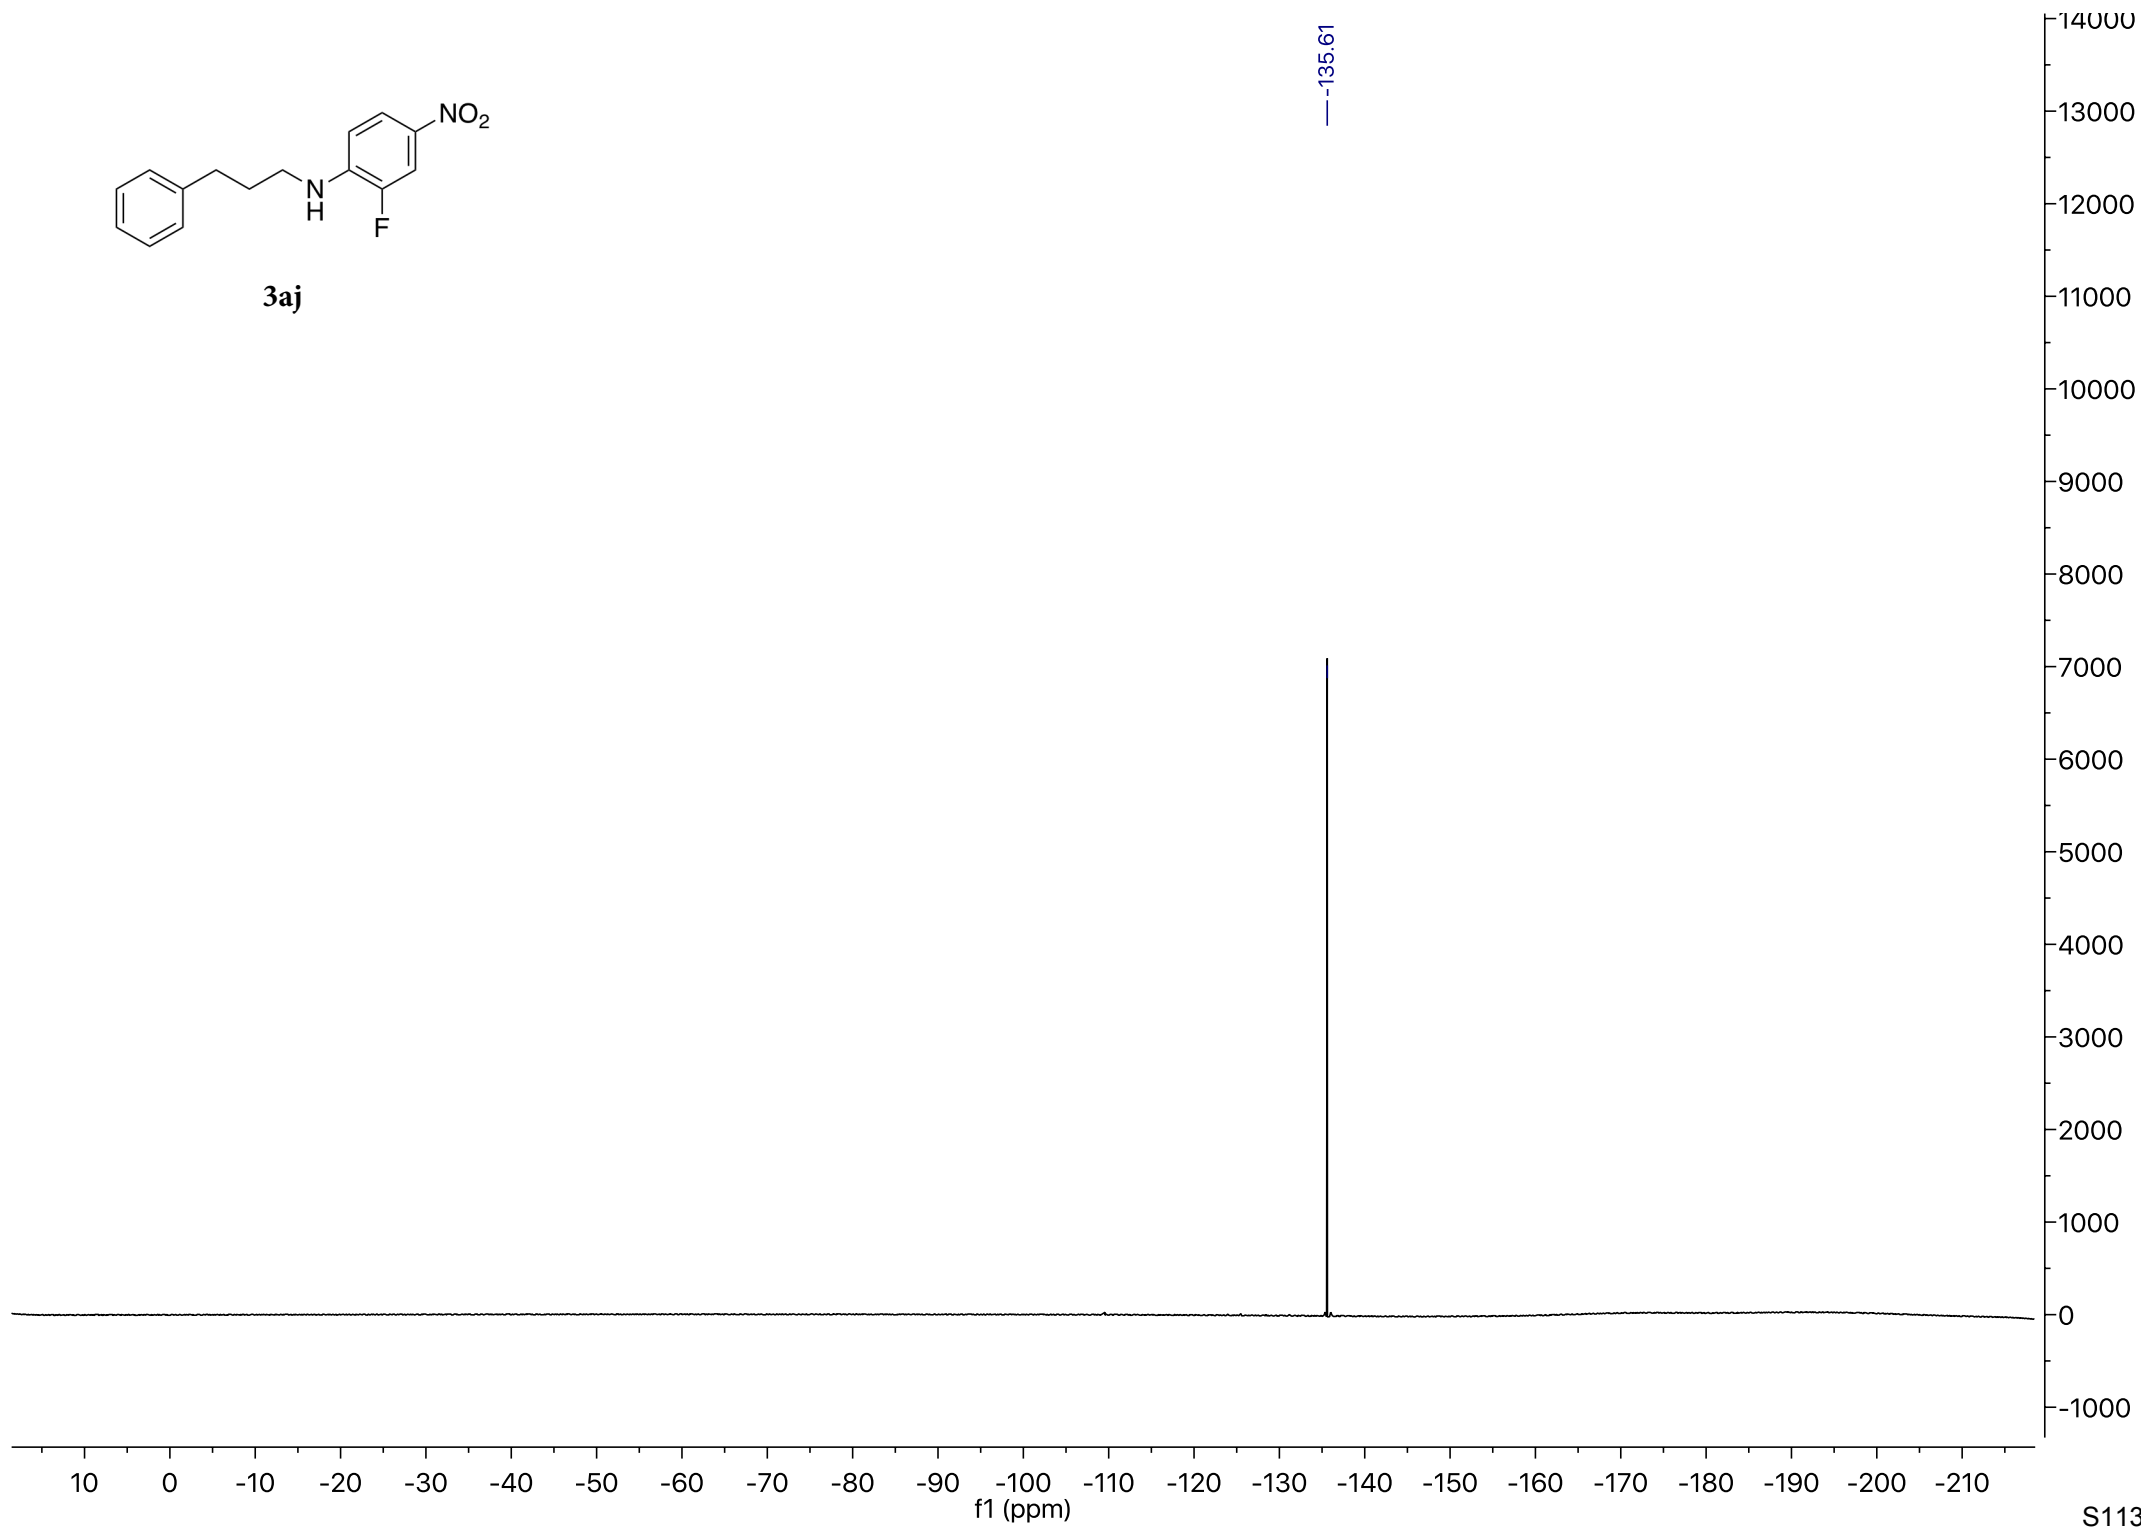

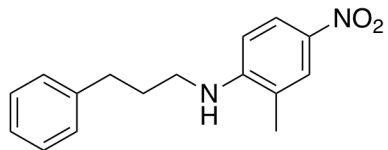

**3ak**

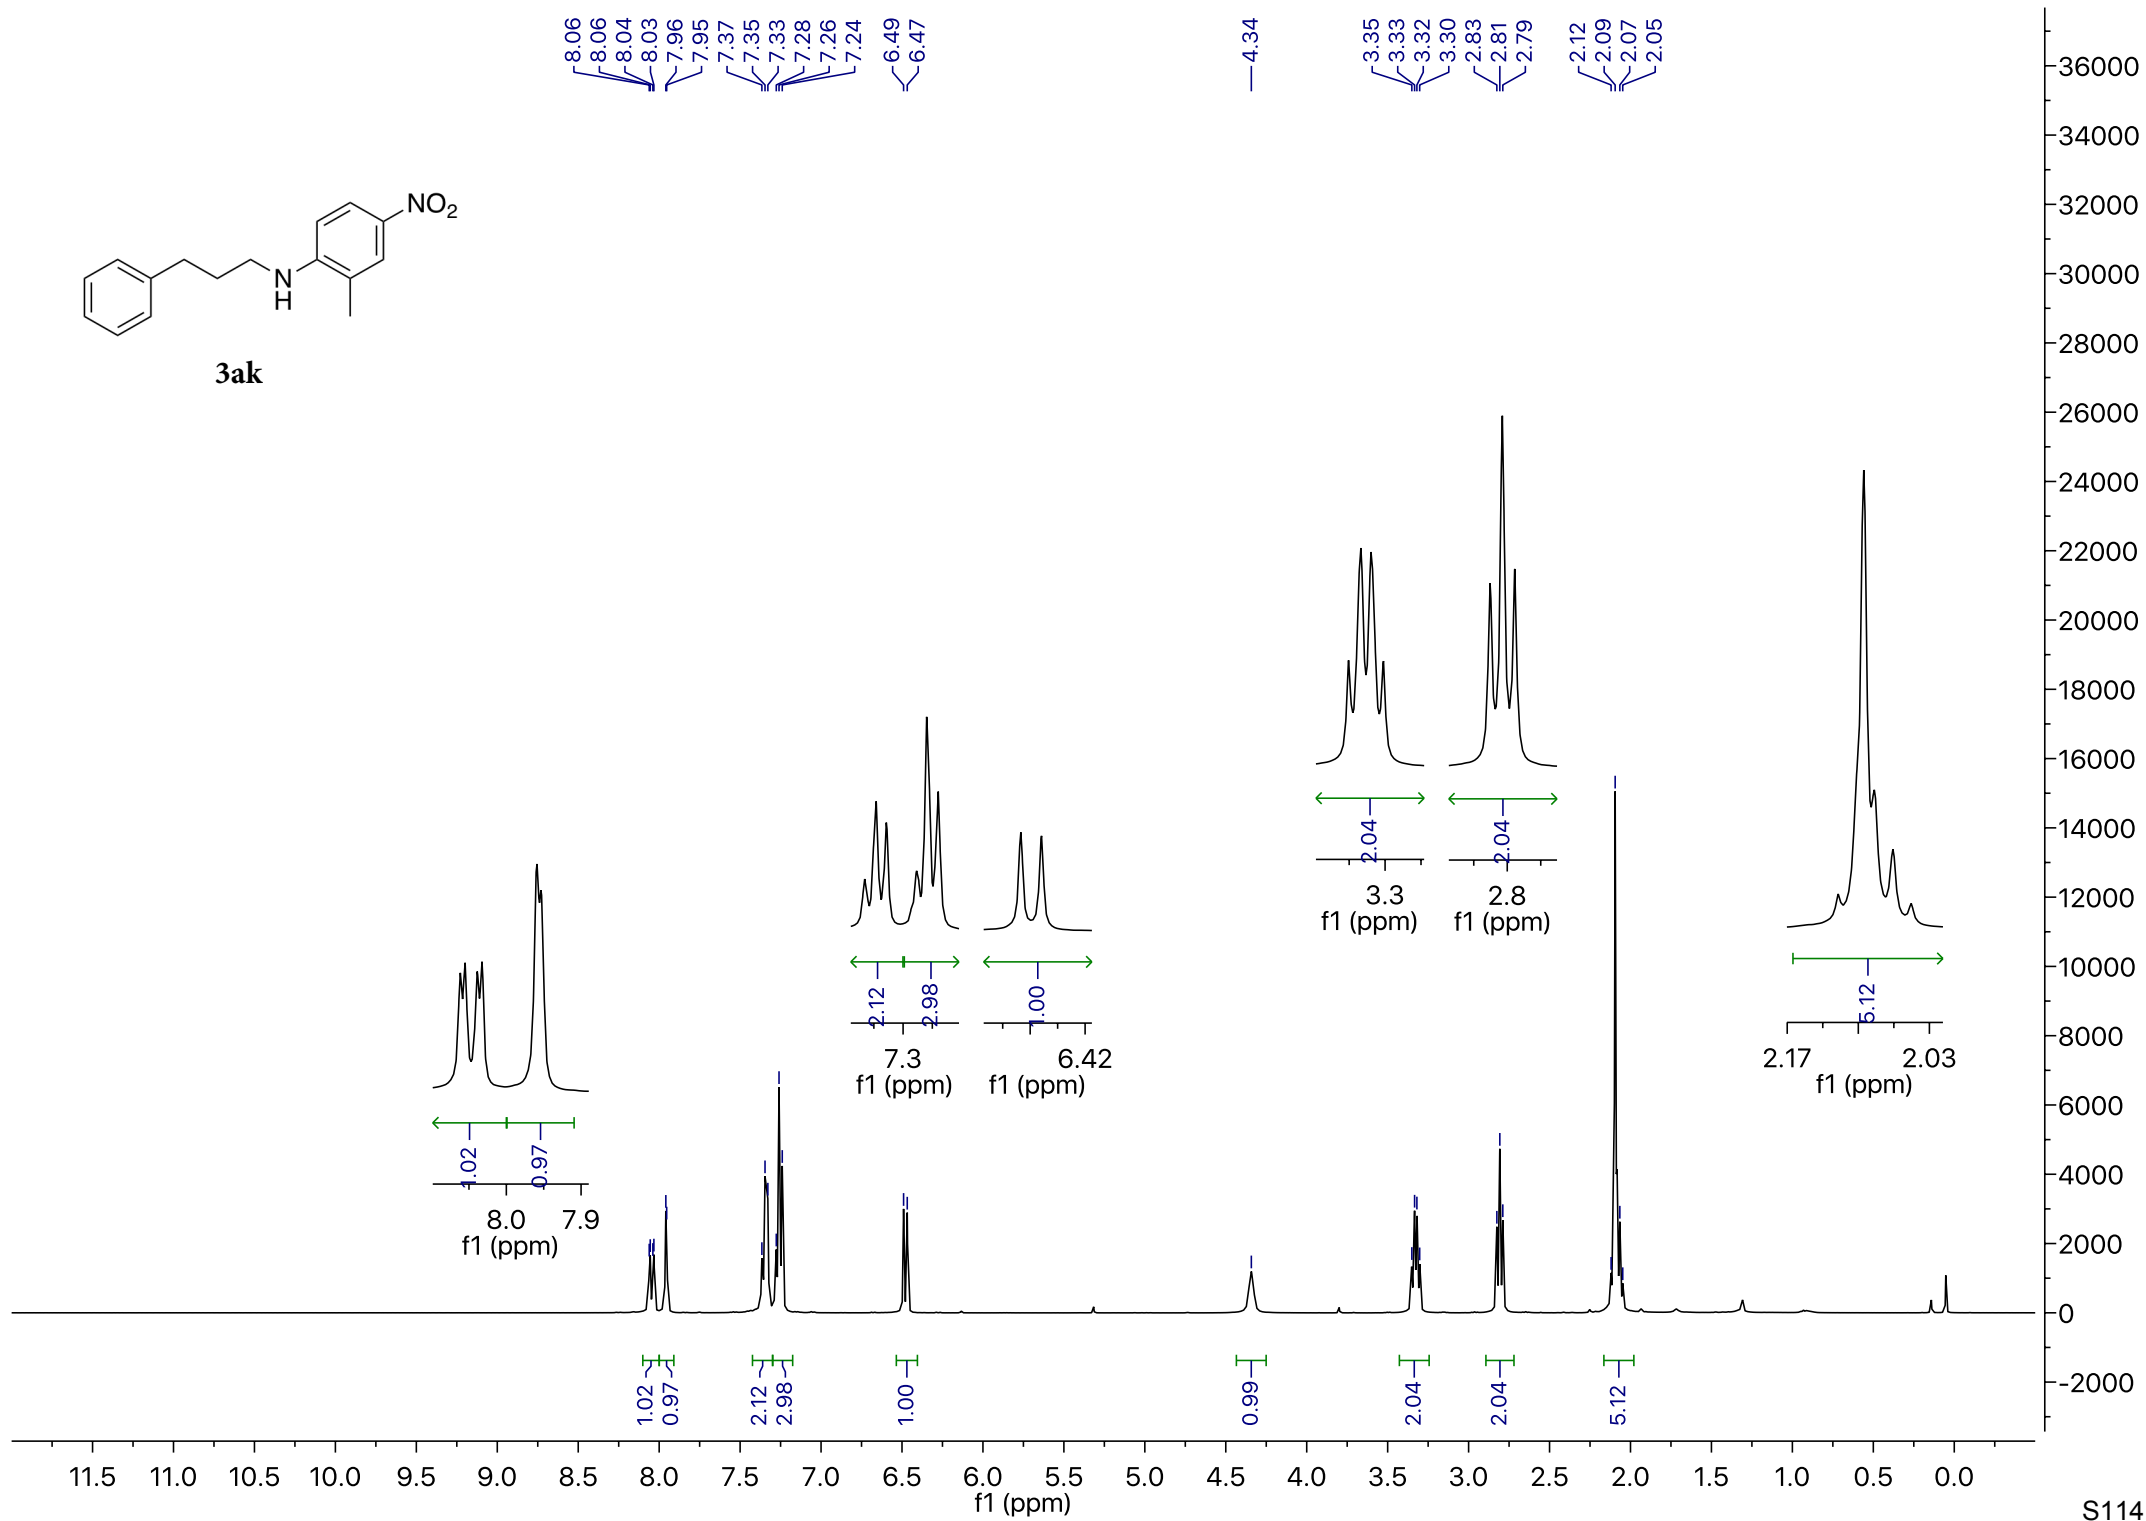

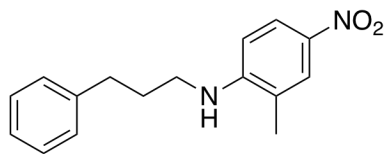

**3ak**

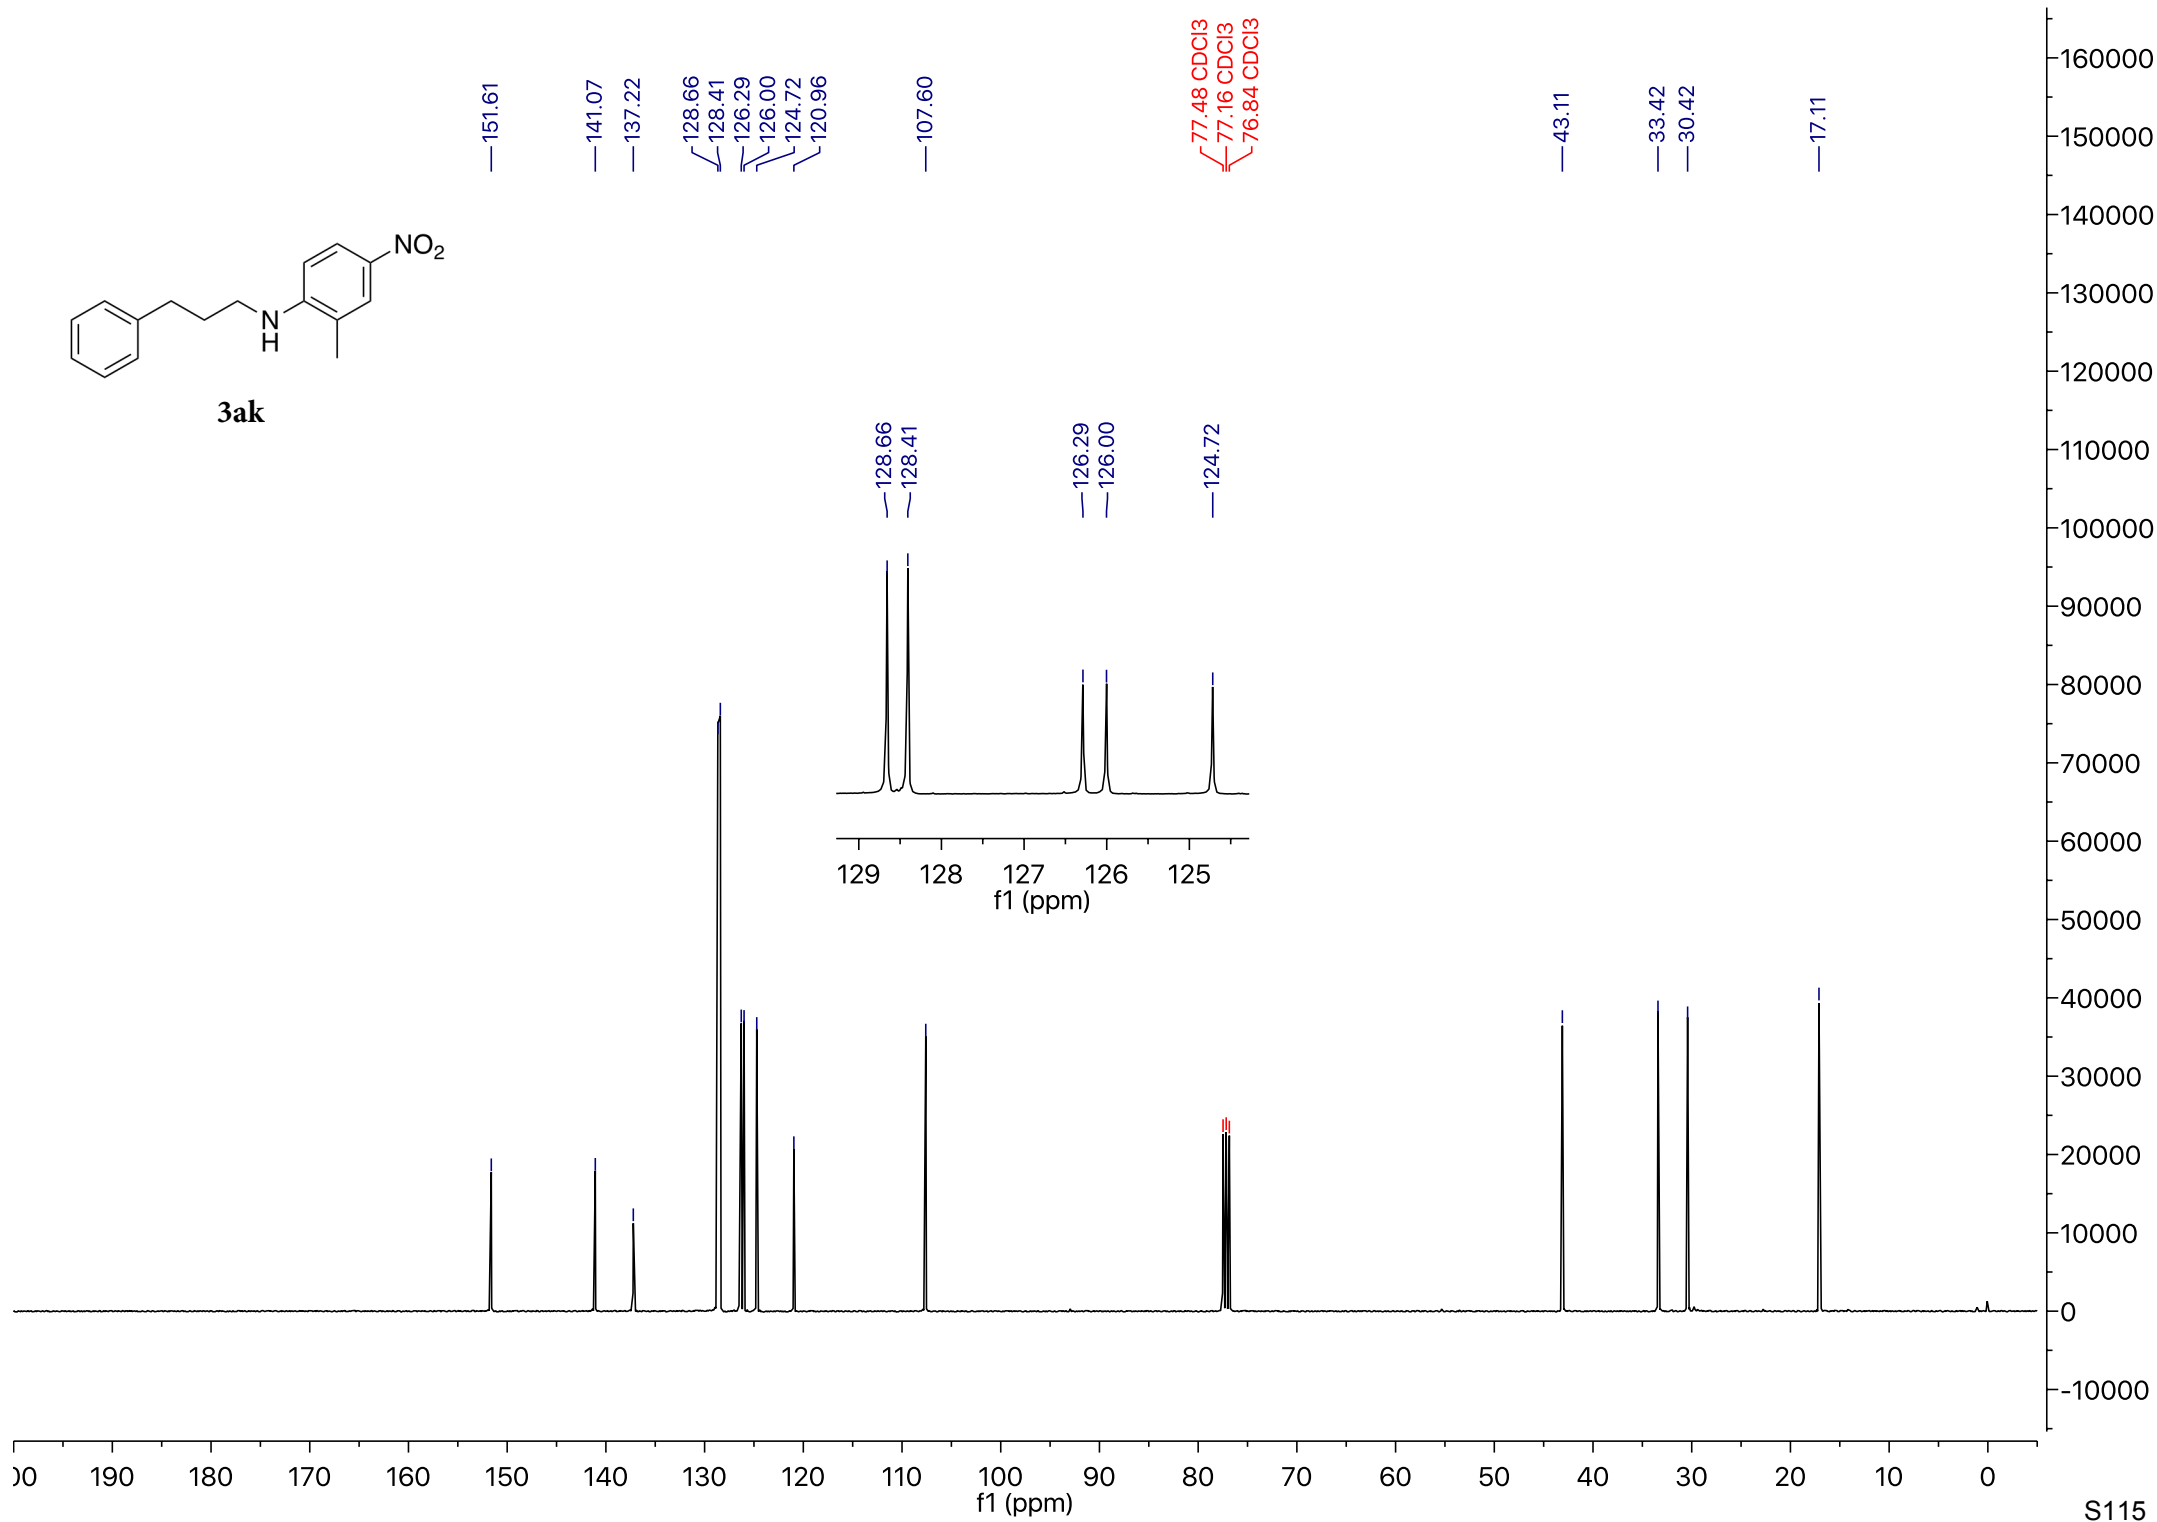



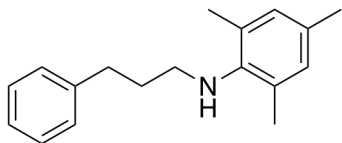

**3al**

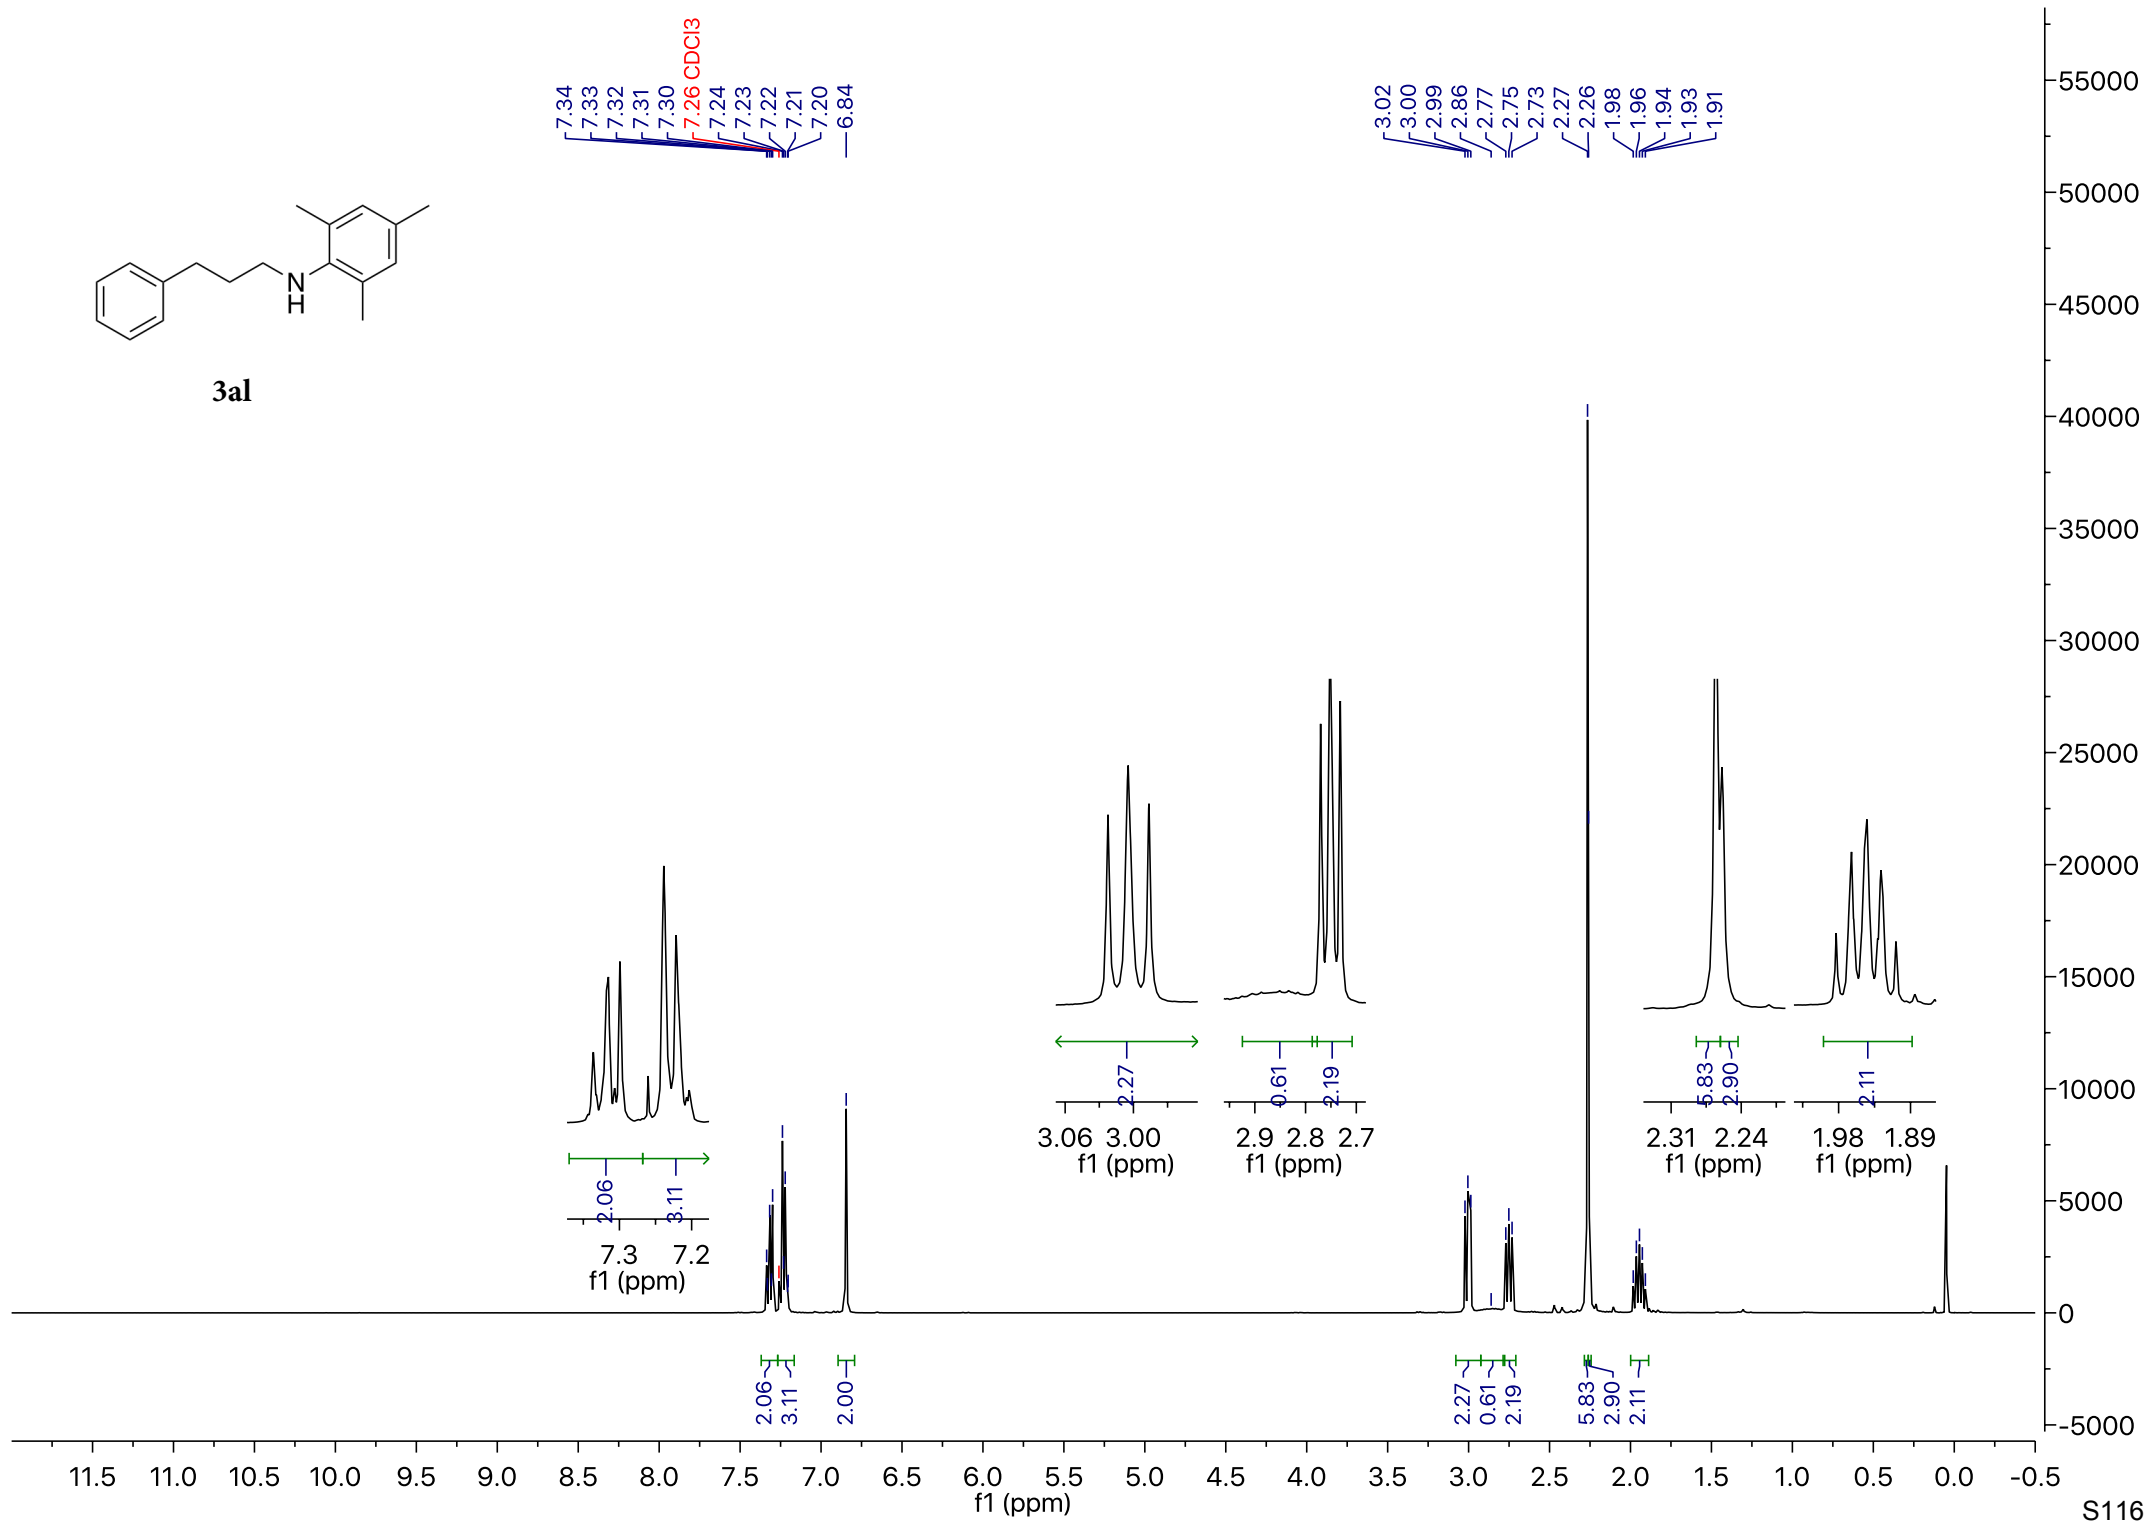

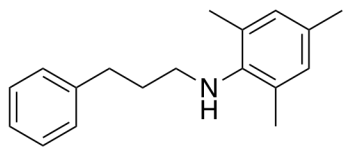

**3al**

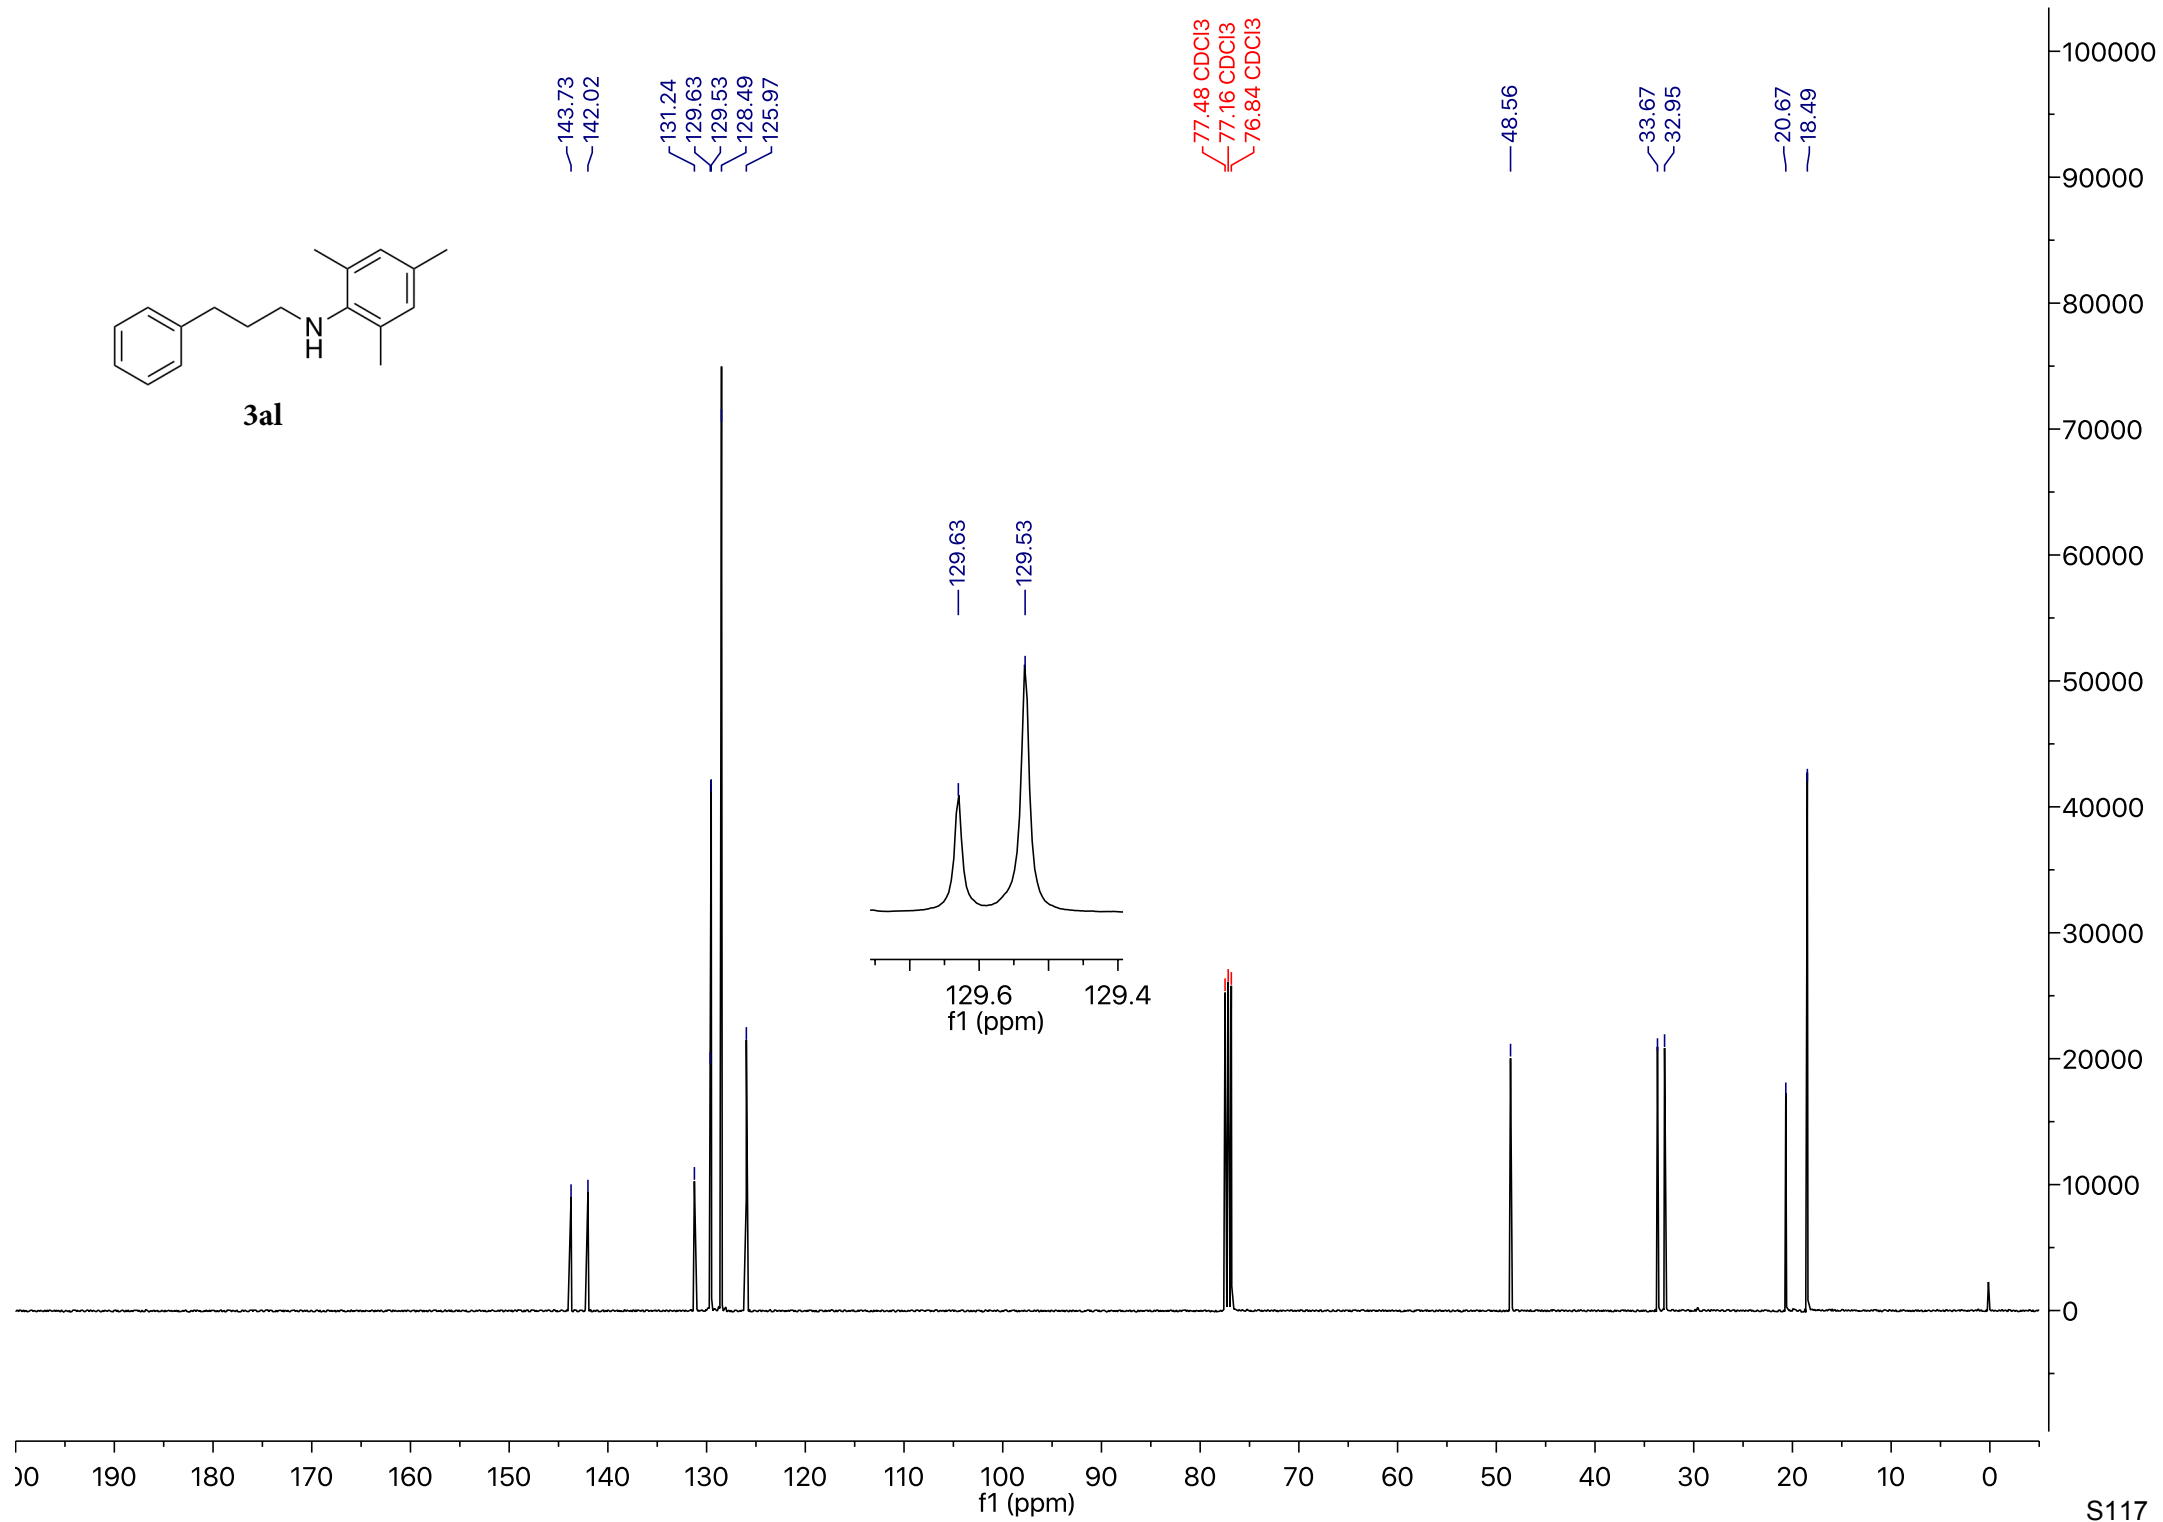

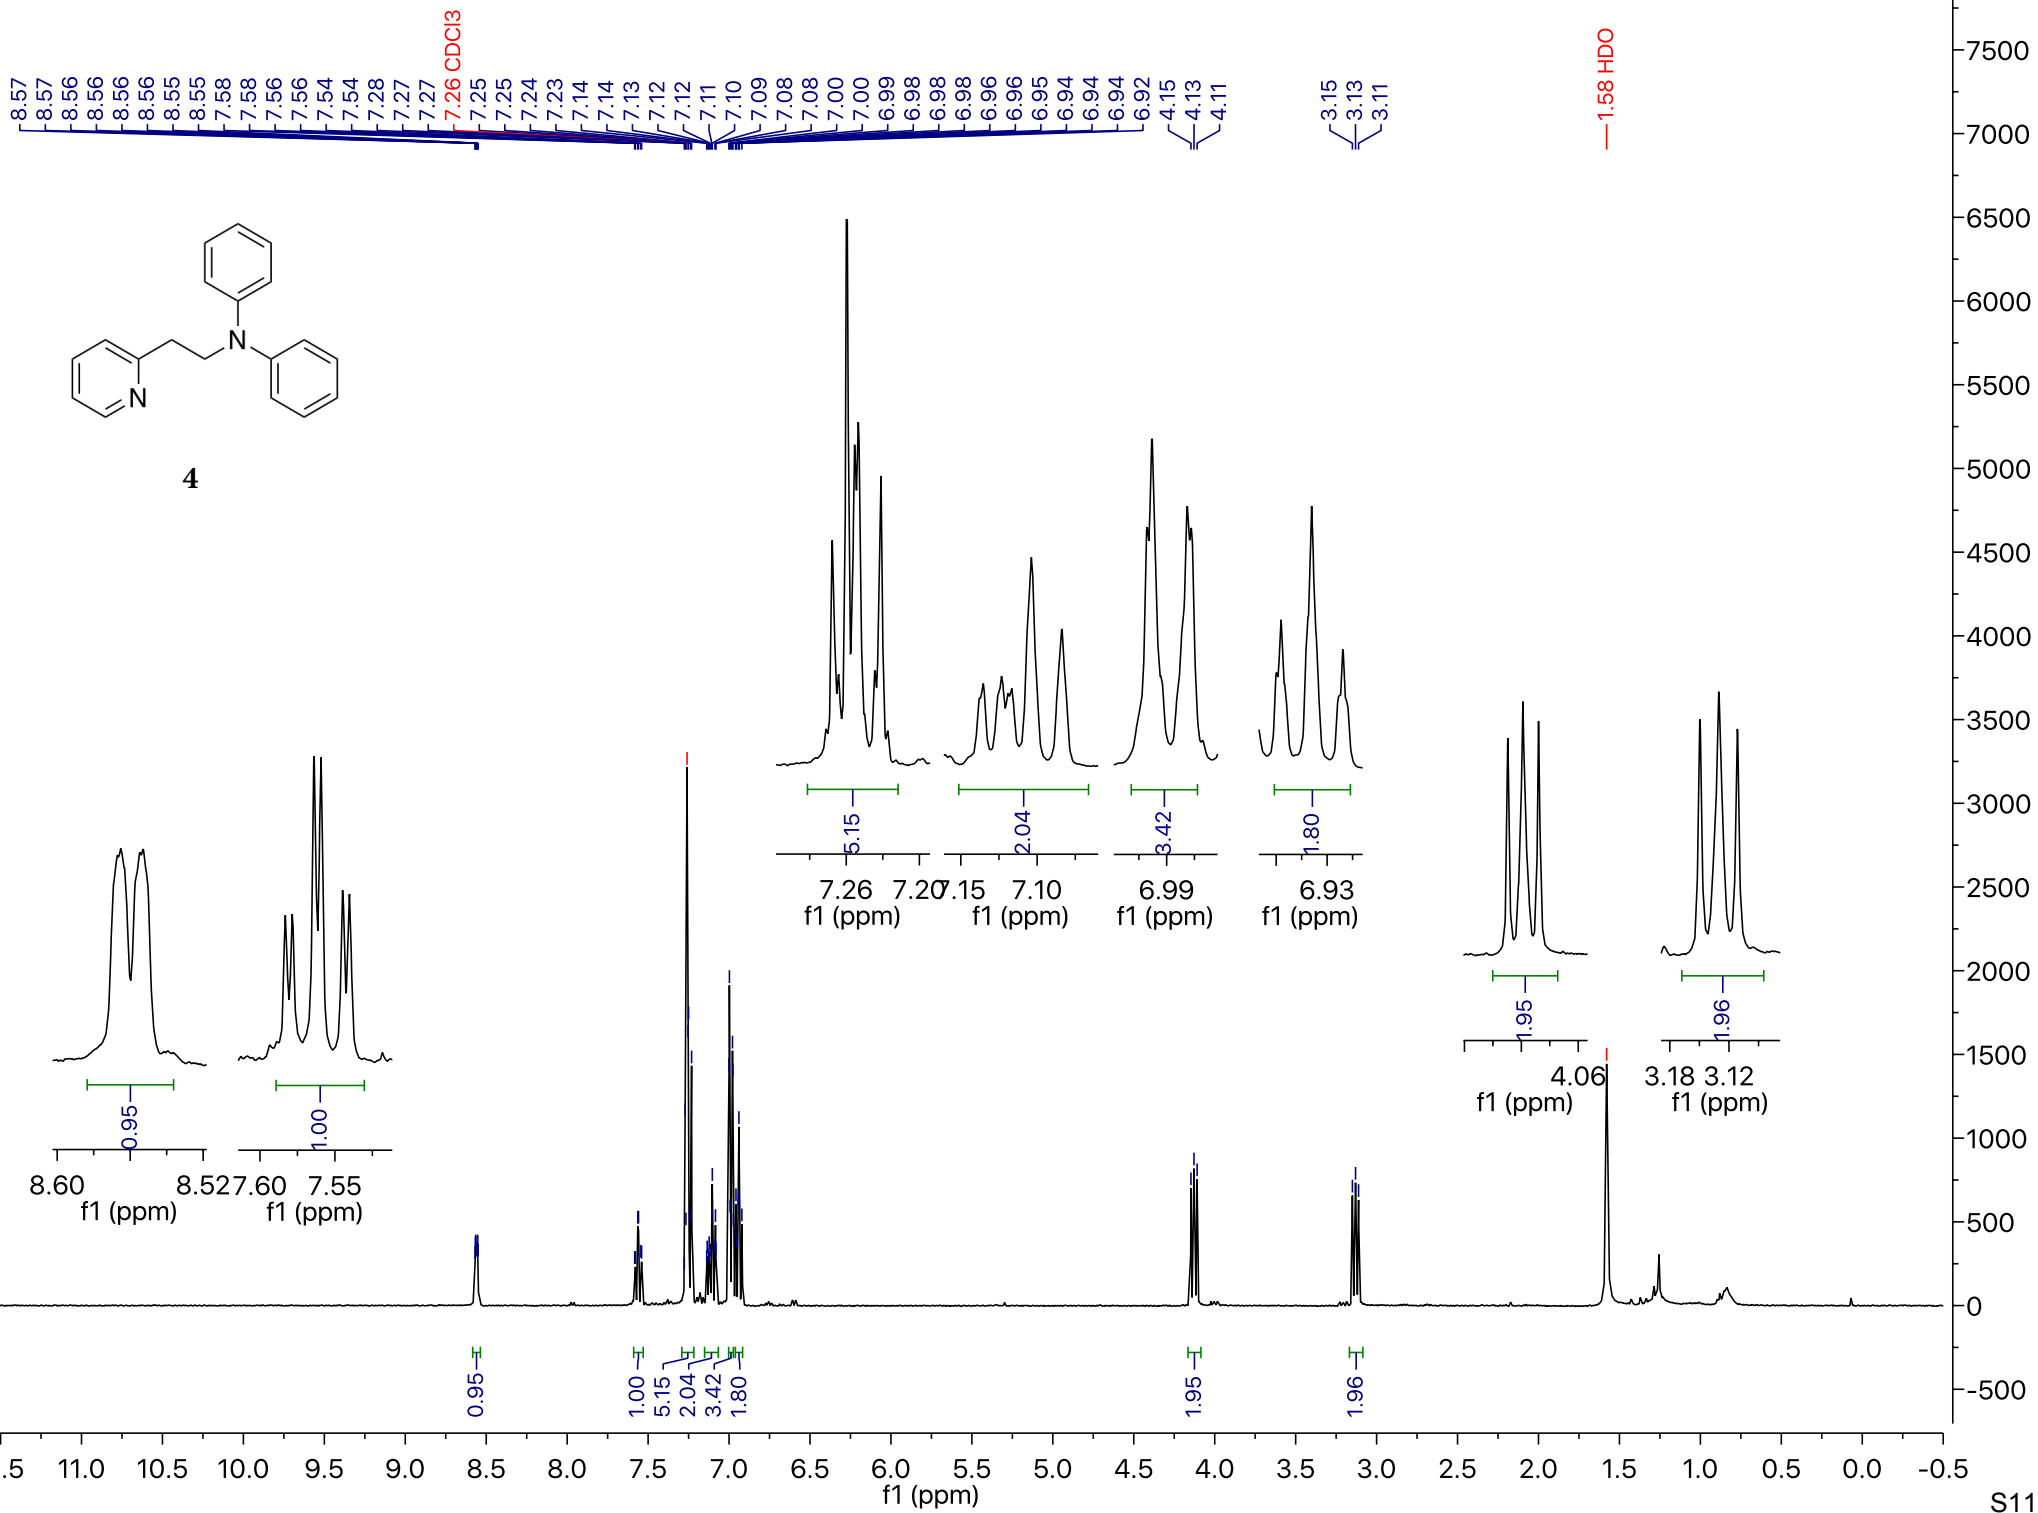

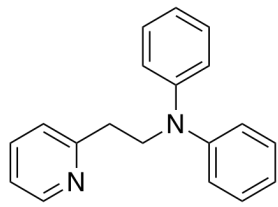

4

— 159.74

— 149.62

— 147.86

— 136.47

— 129.43

— 123.73

— 121.51

— 121.43

— 121.14

— 100.12

77.48 CDCl<sub>3</sub>

77.46 CDCl<sub>3</sub>

76.84 CDCl<sub>3</sub>

— 52.34

— 36.19

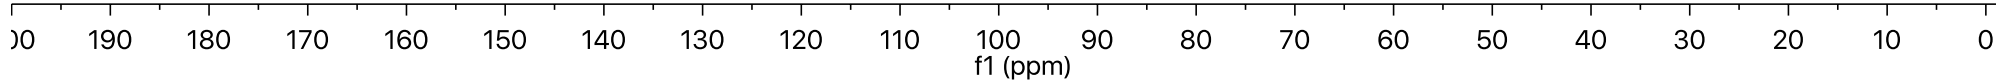

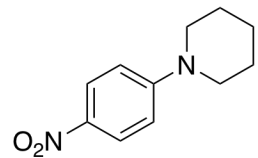

5a

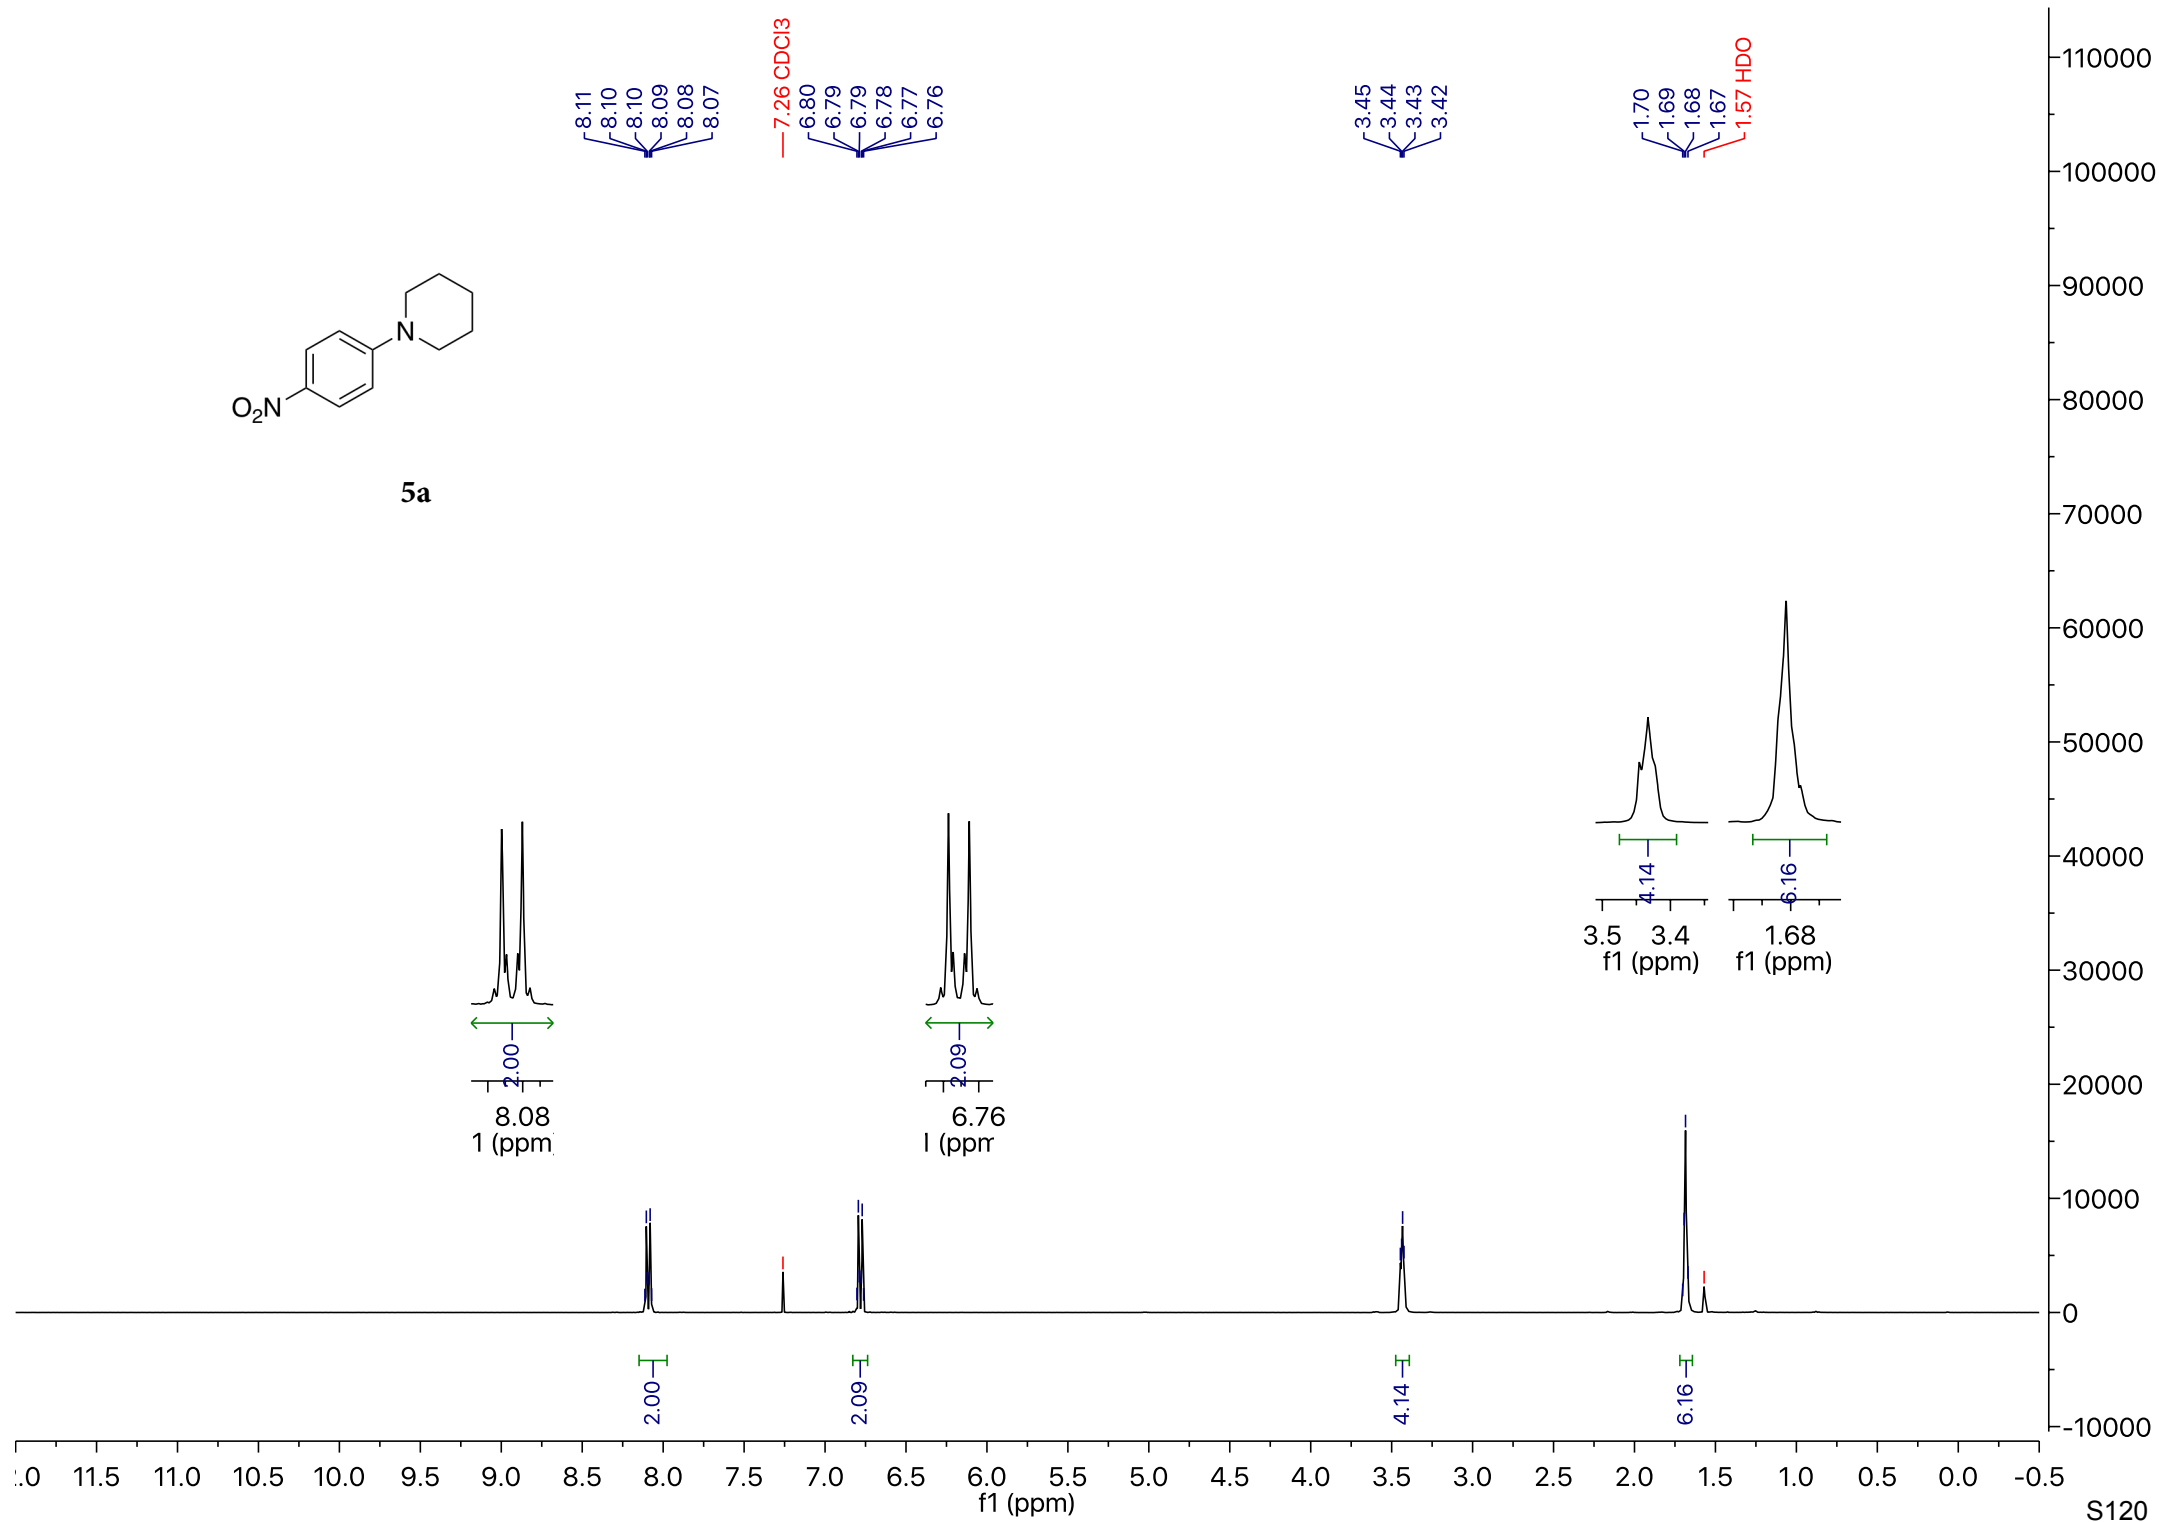

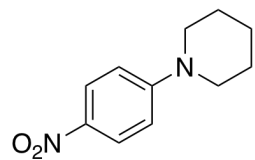

5a

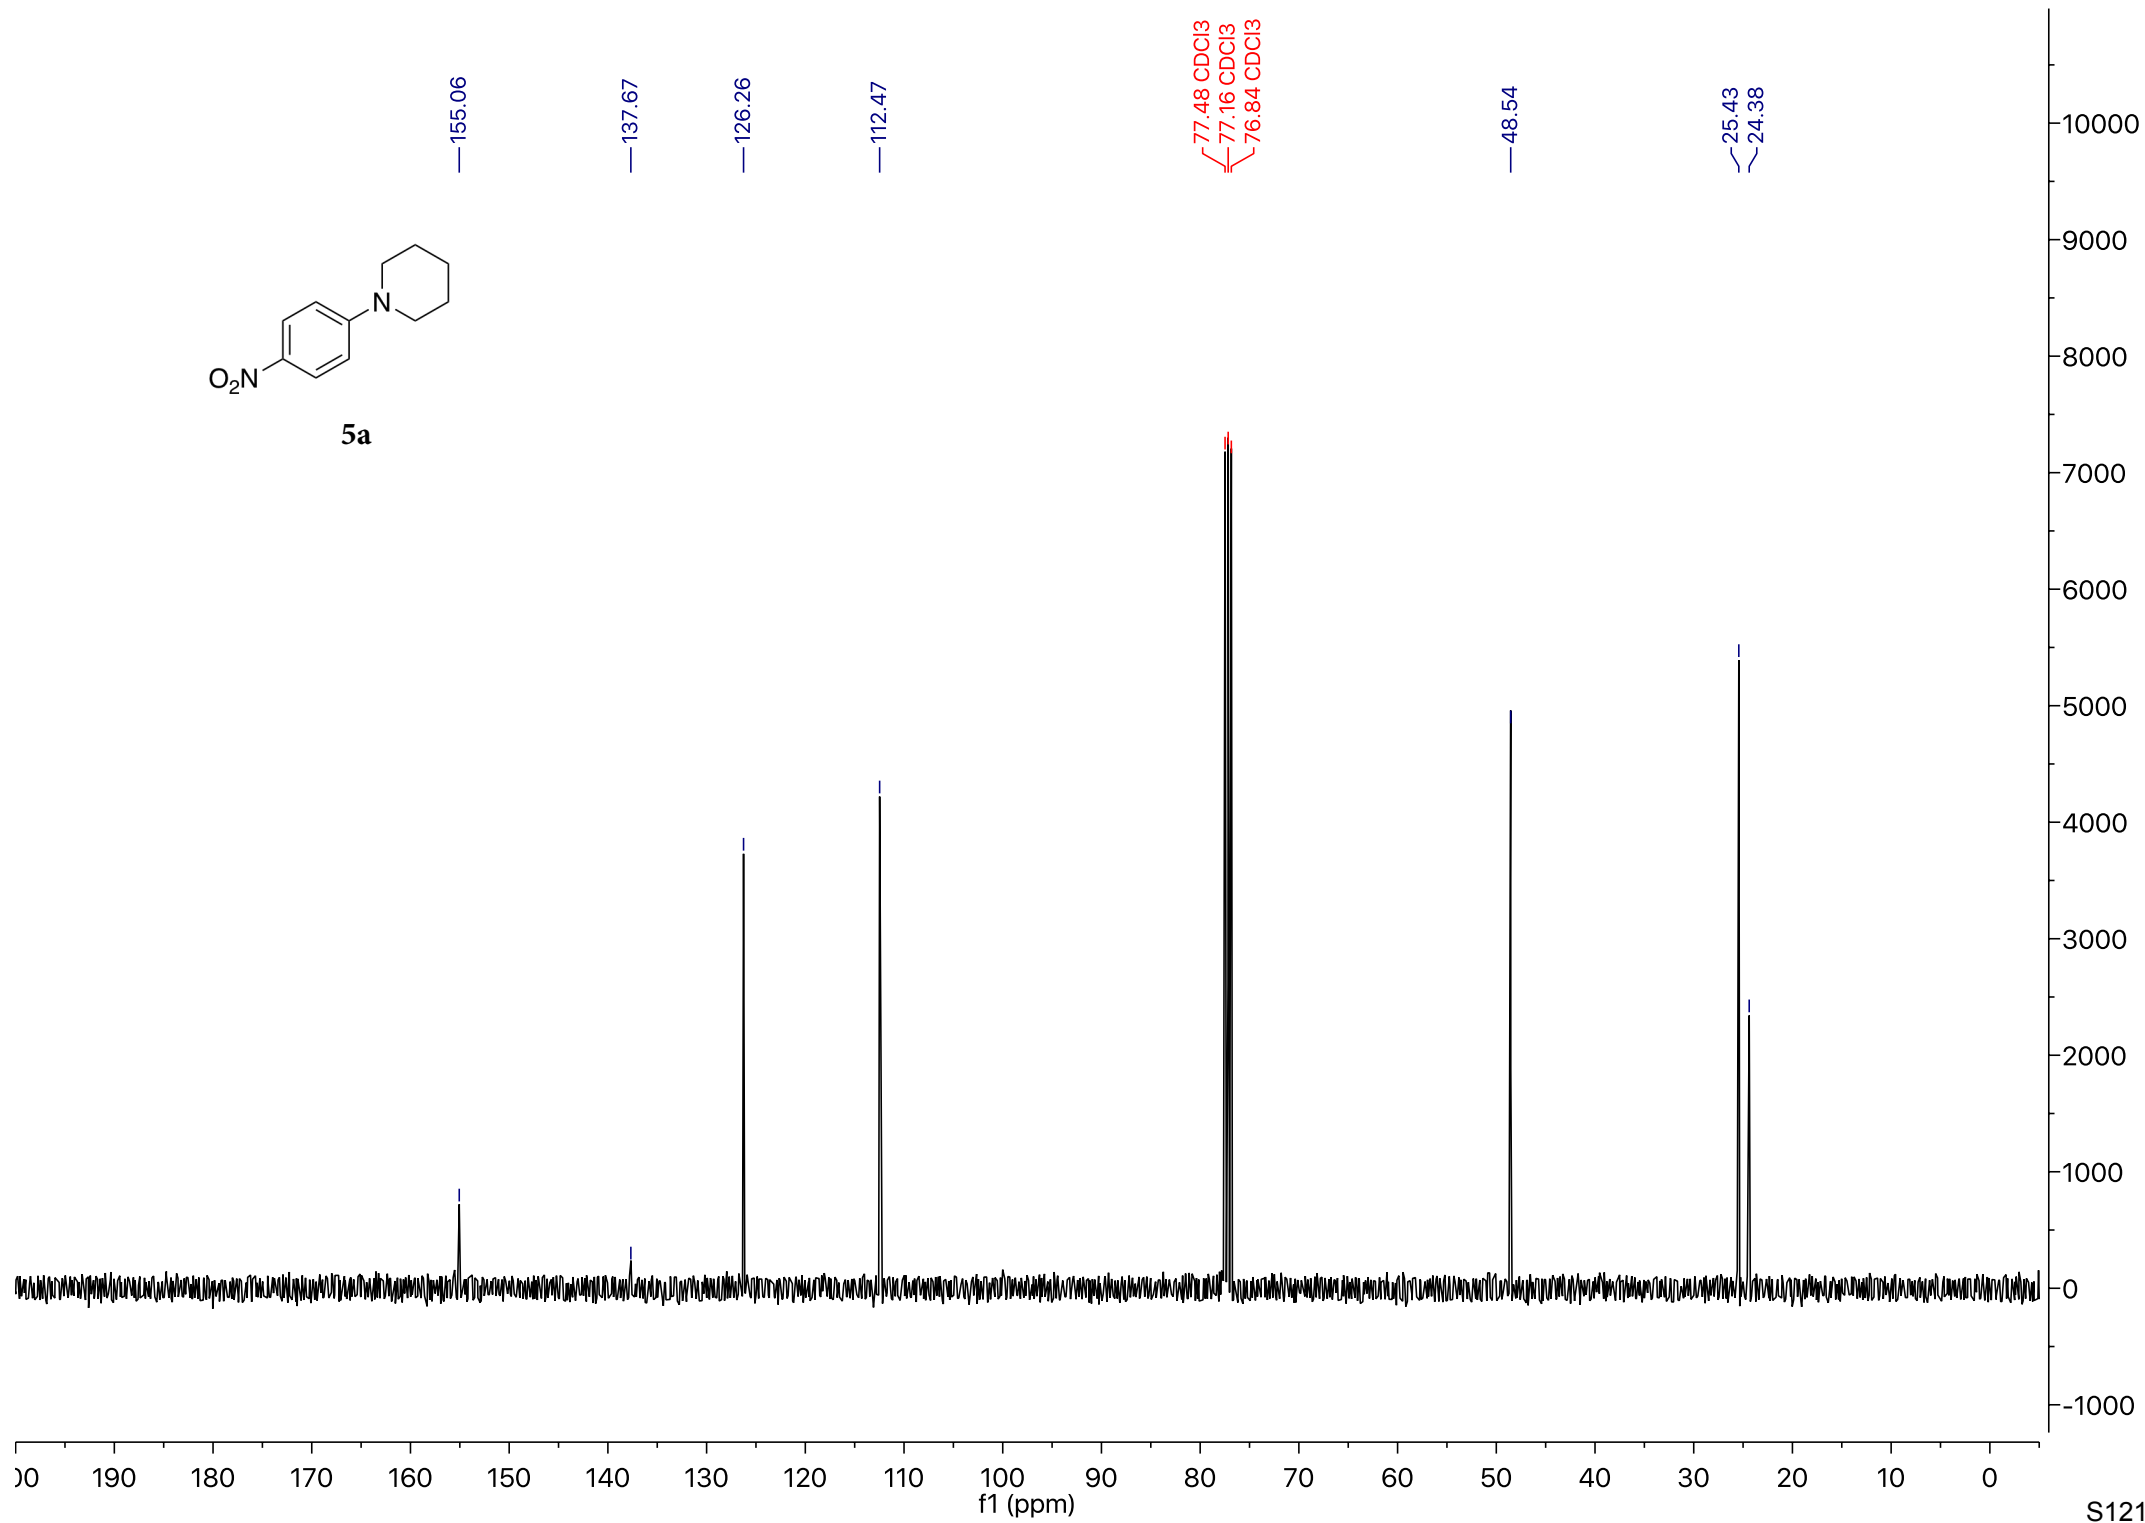

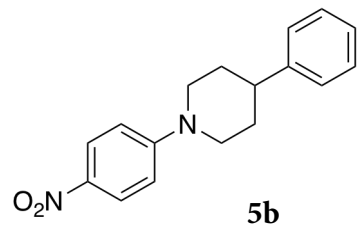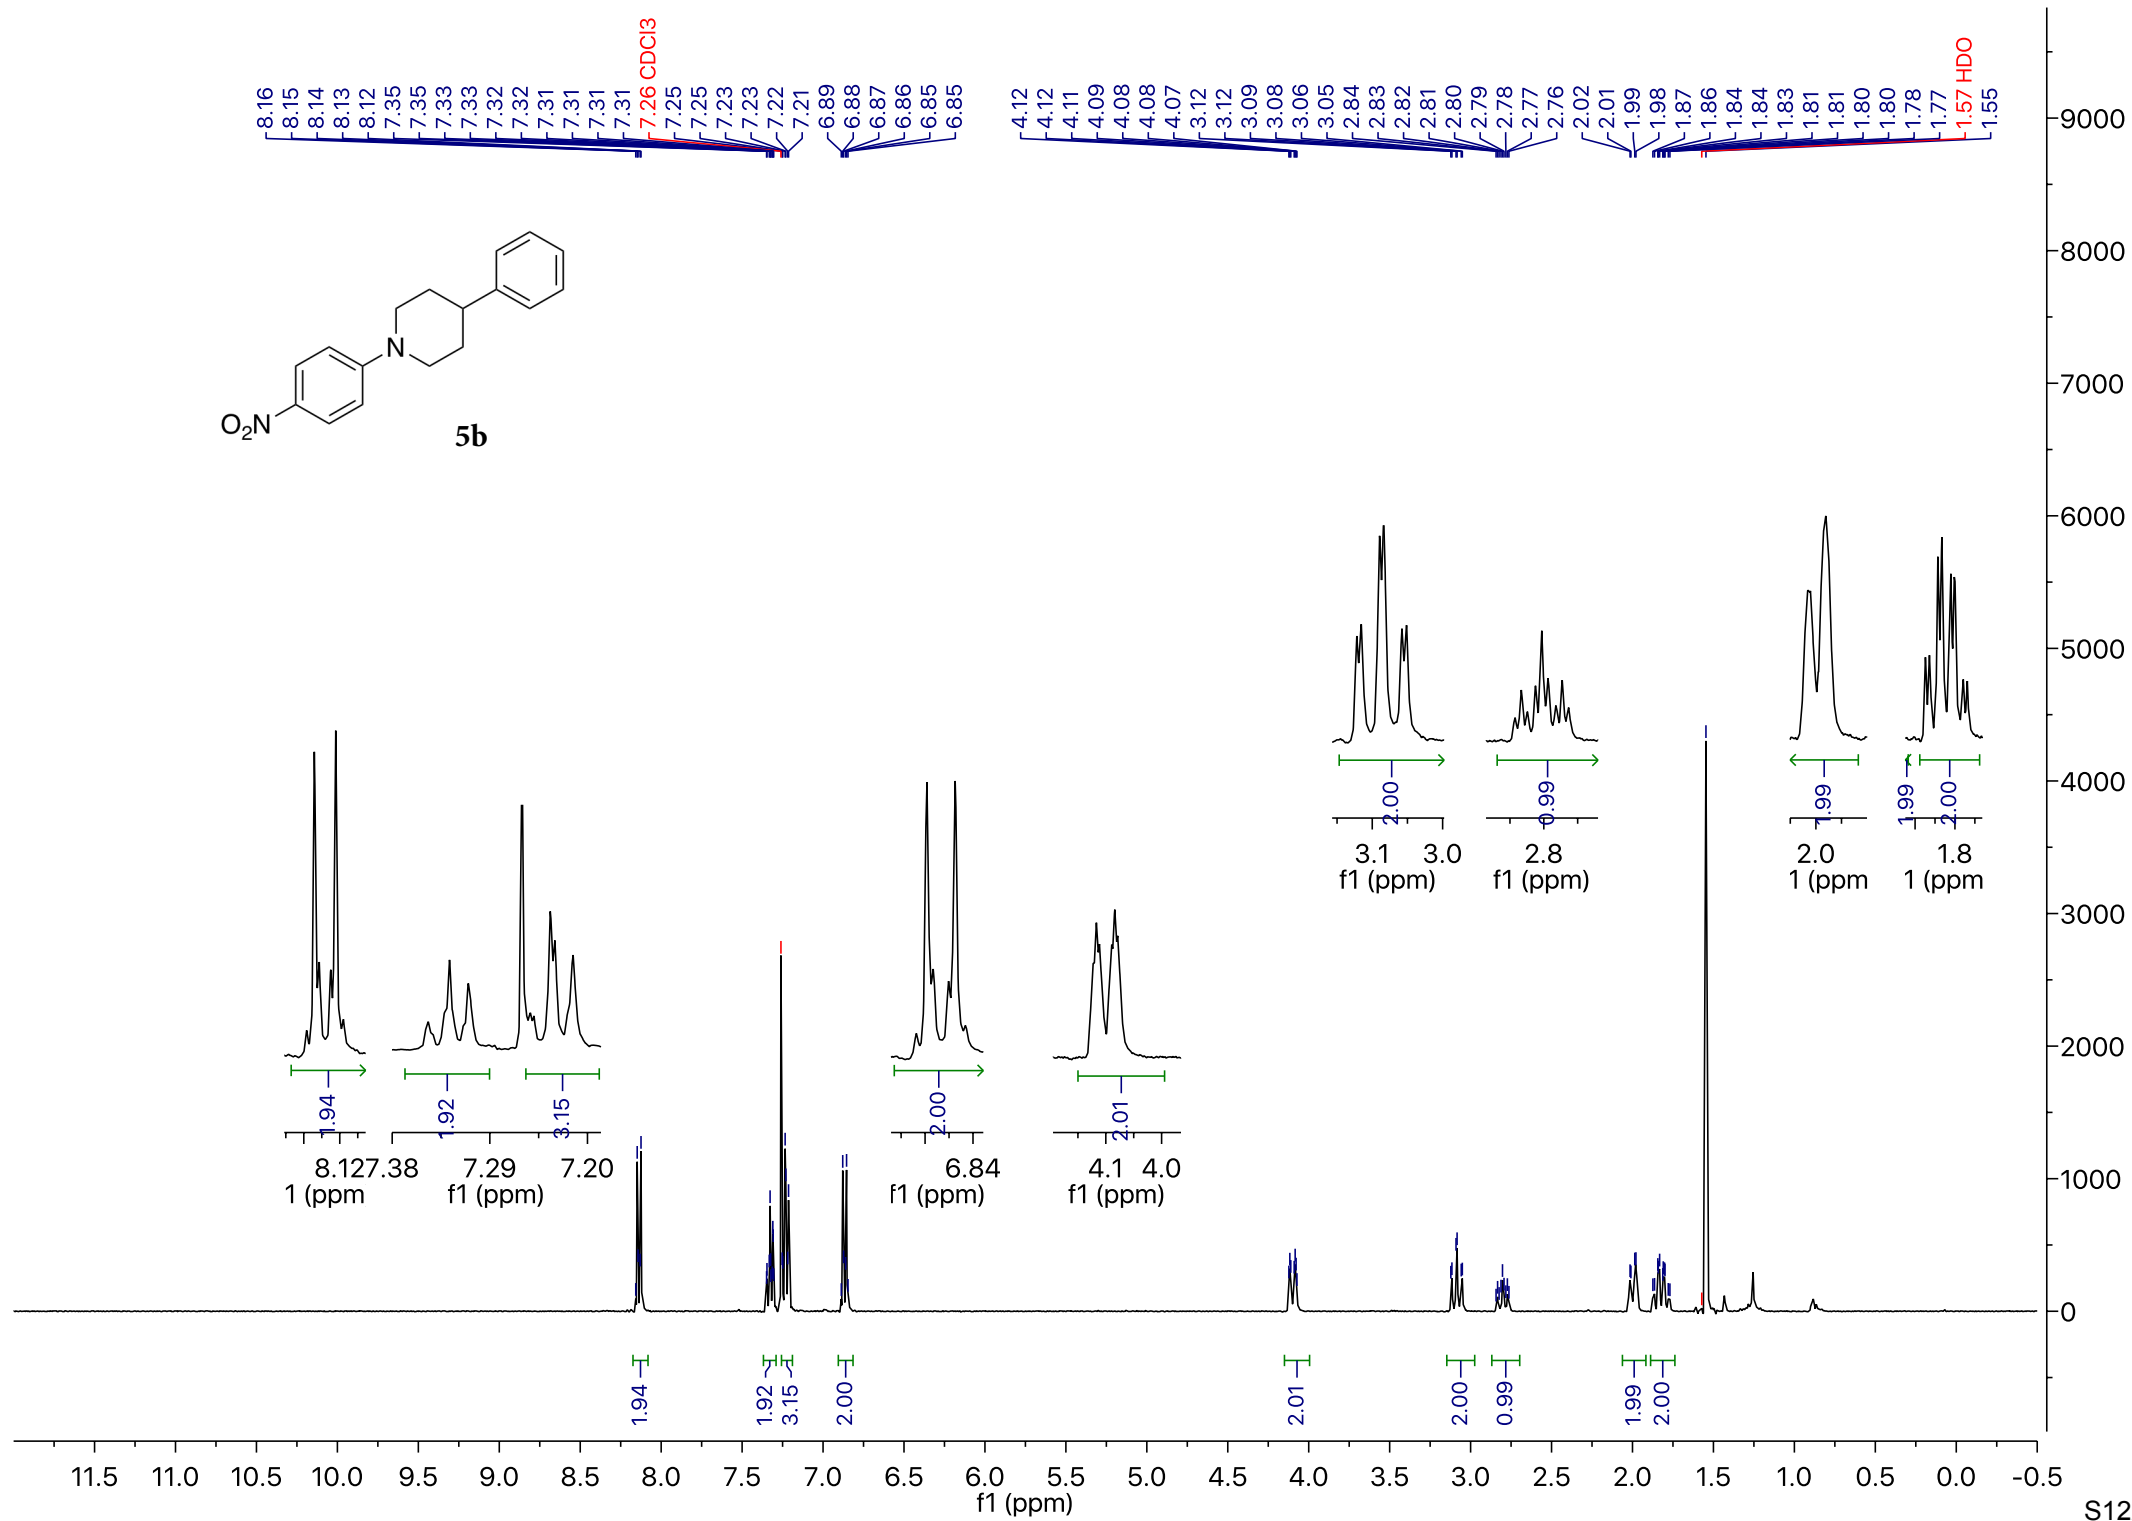

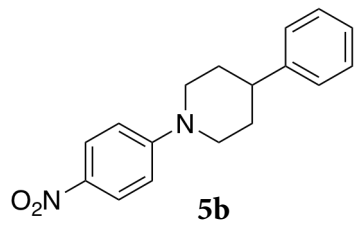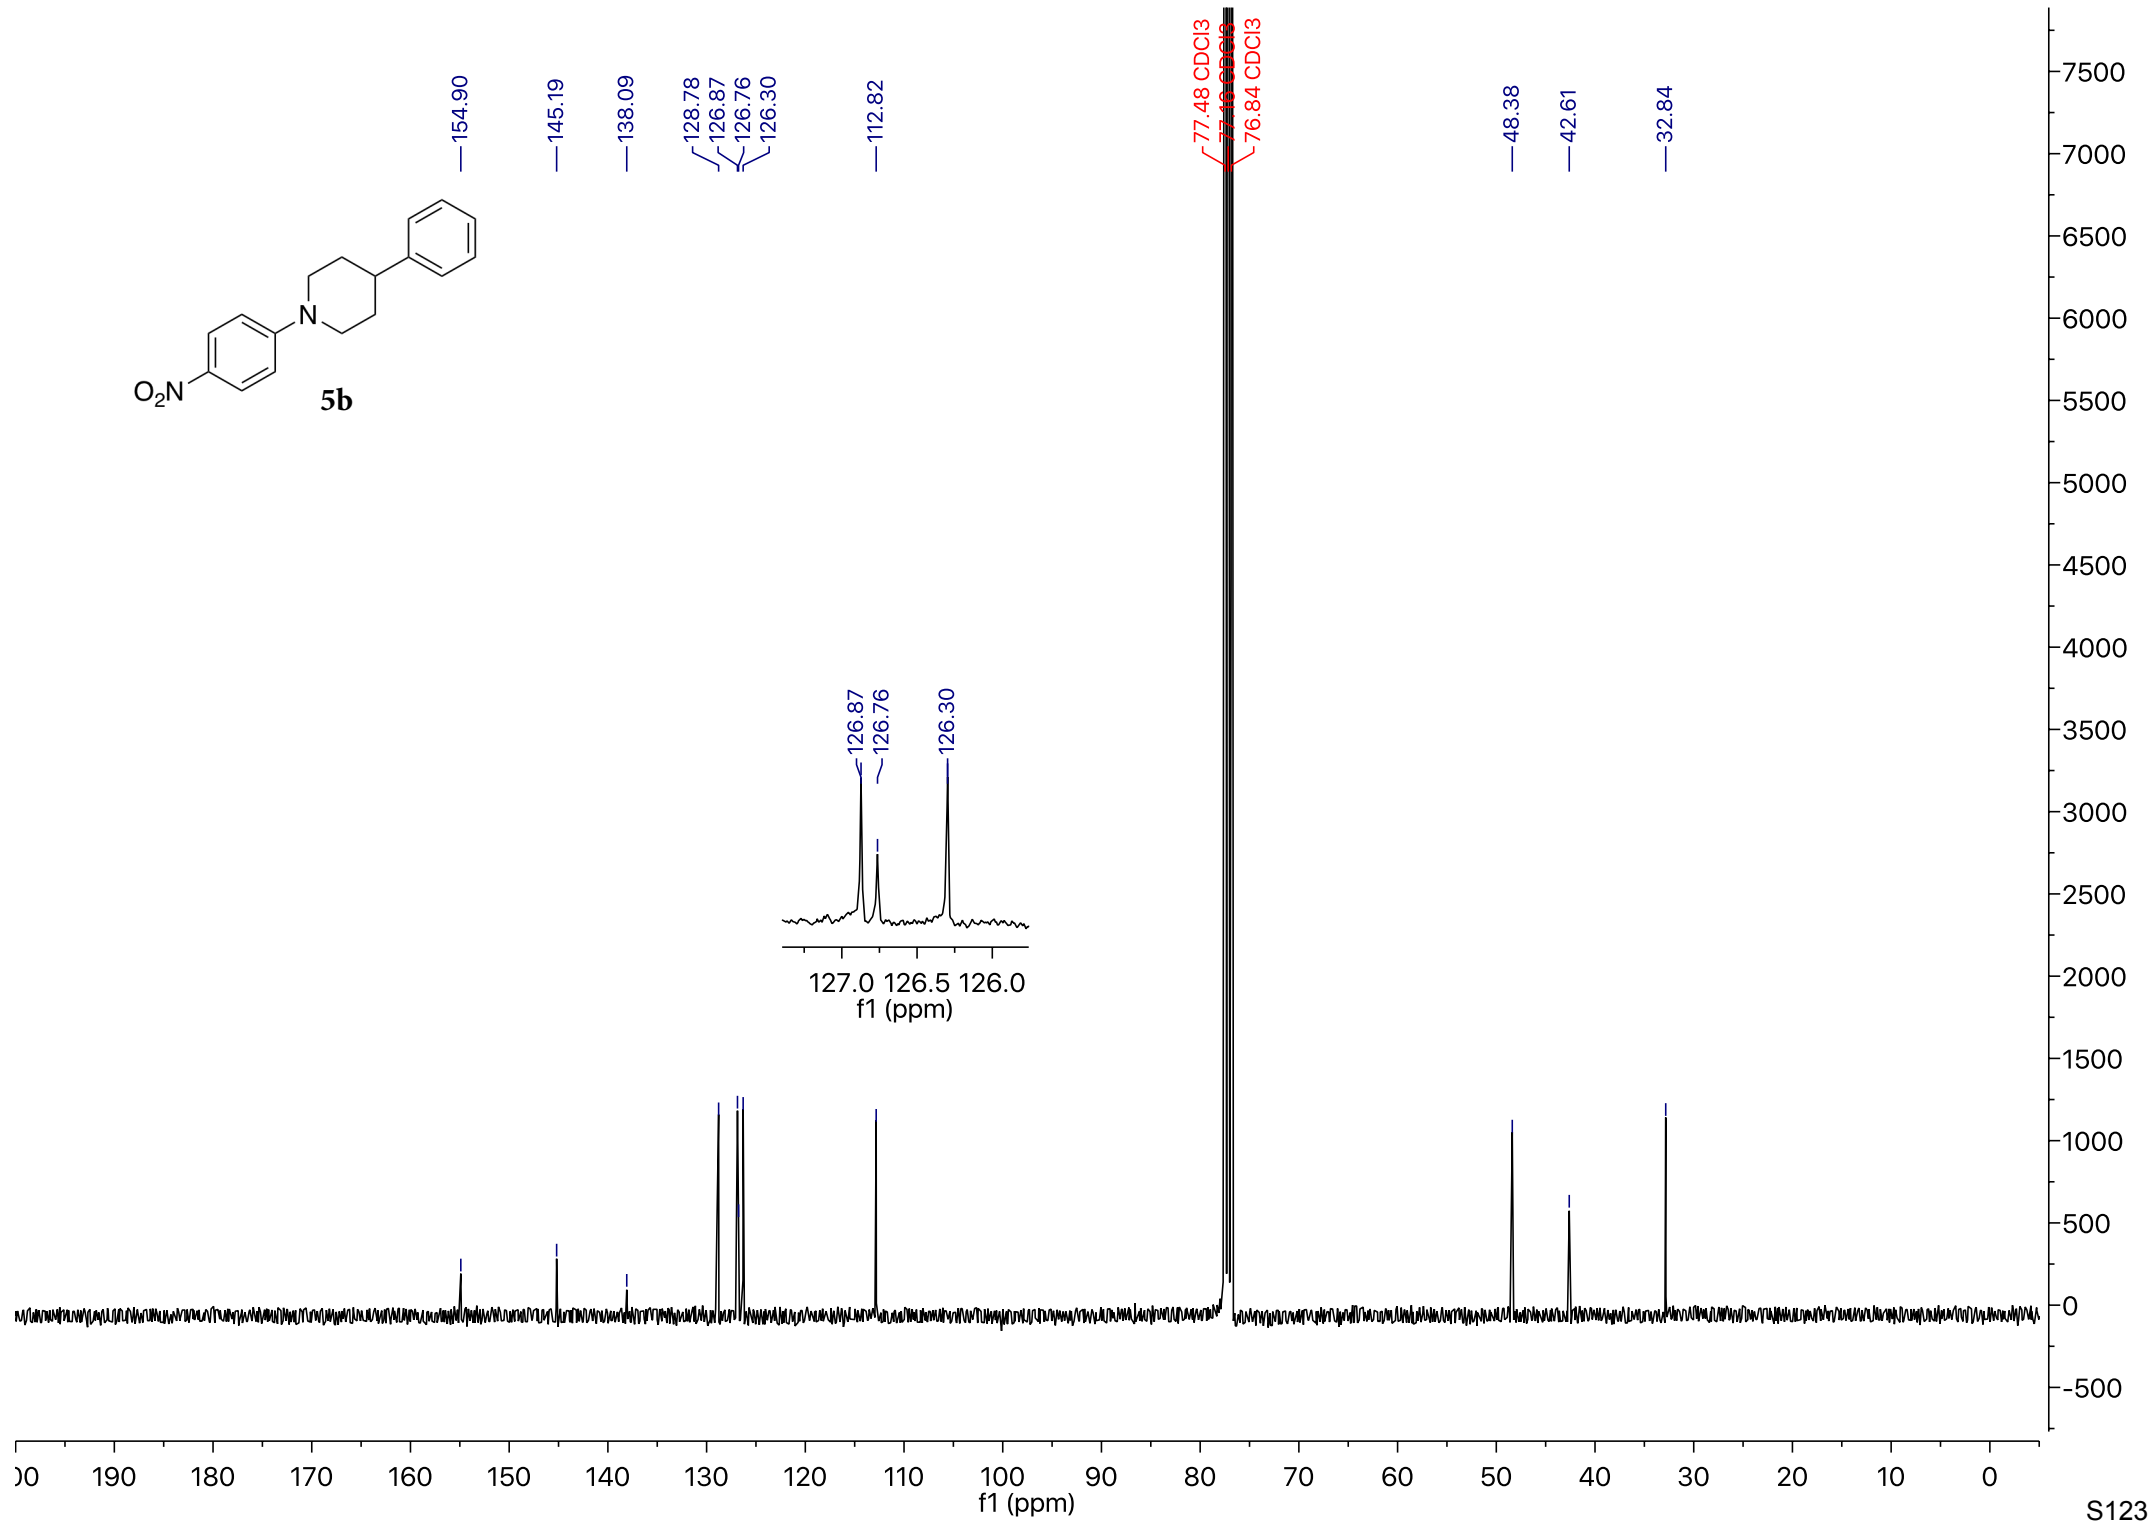



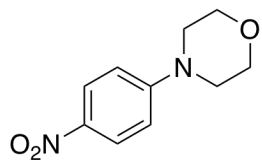

5c

8.17  
8.16  
8.15  
8.14  
8.13  
8.12

7.26 CDCl3

6.85  
6.85  
6.84  
6.83  
6.82  
6.81

3.88  
3.87  
3.87  
3.86  
3.86  
3.85  
3.39  
3.38  
3.38  
3.37  
3.37  
3.36

1.56 H2O

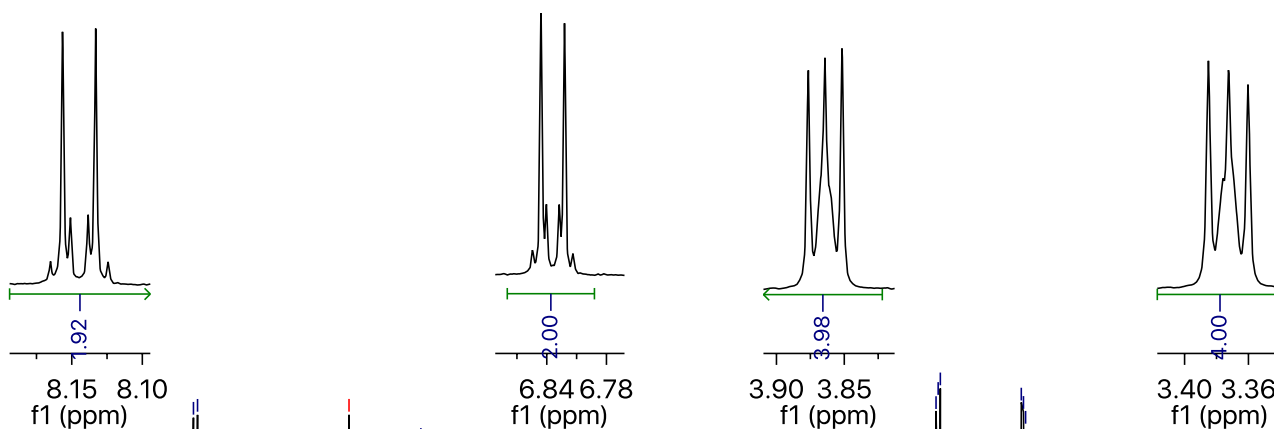

1.92

2.00

3.98

4.00

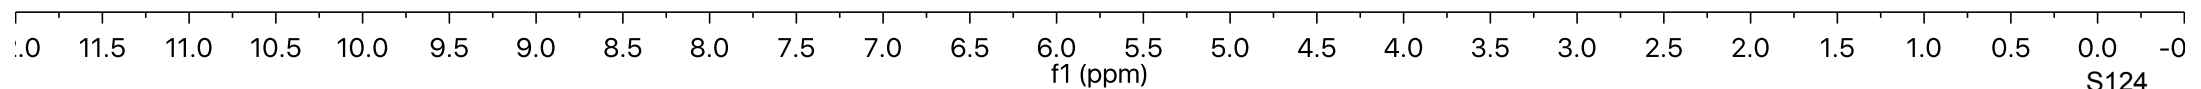

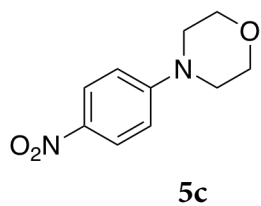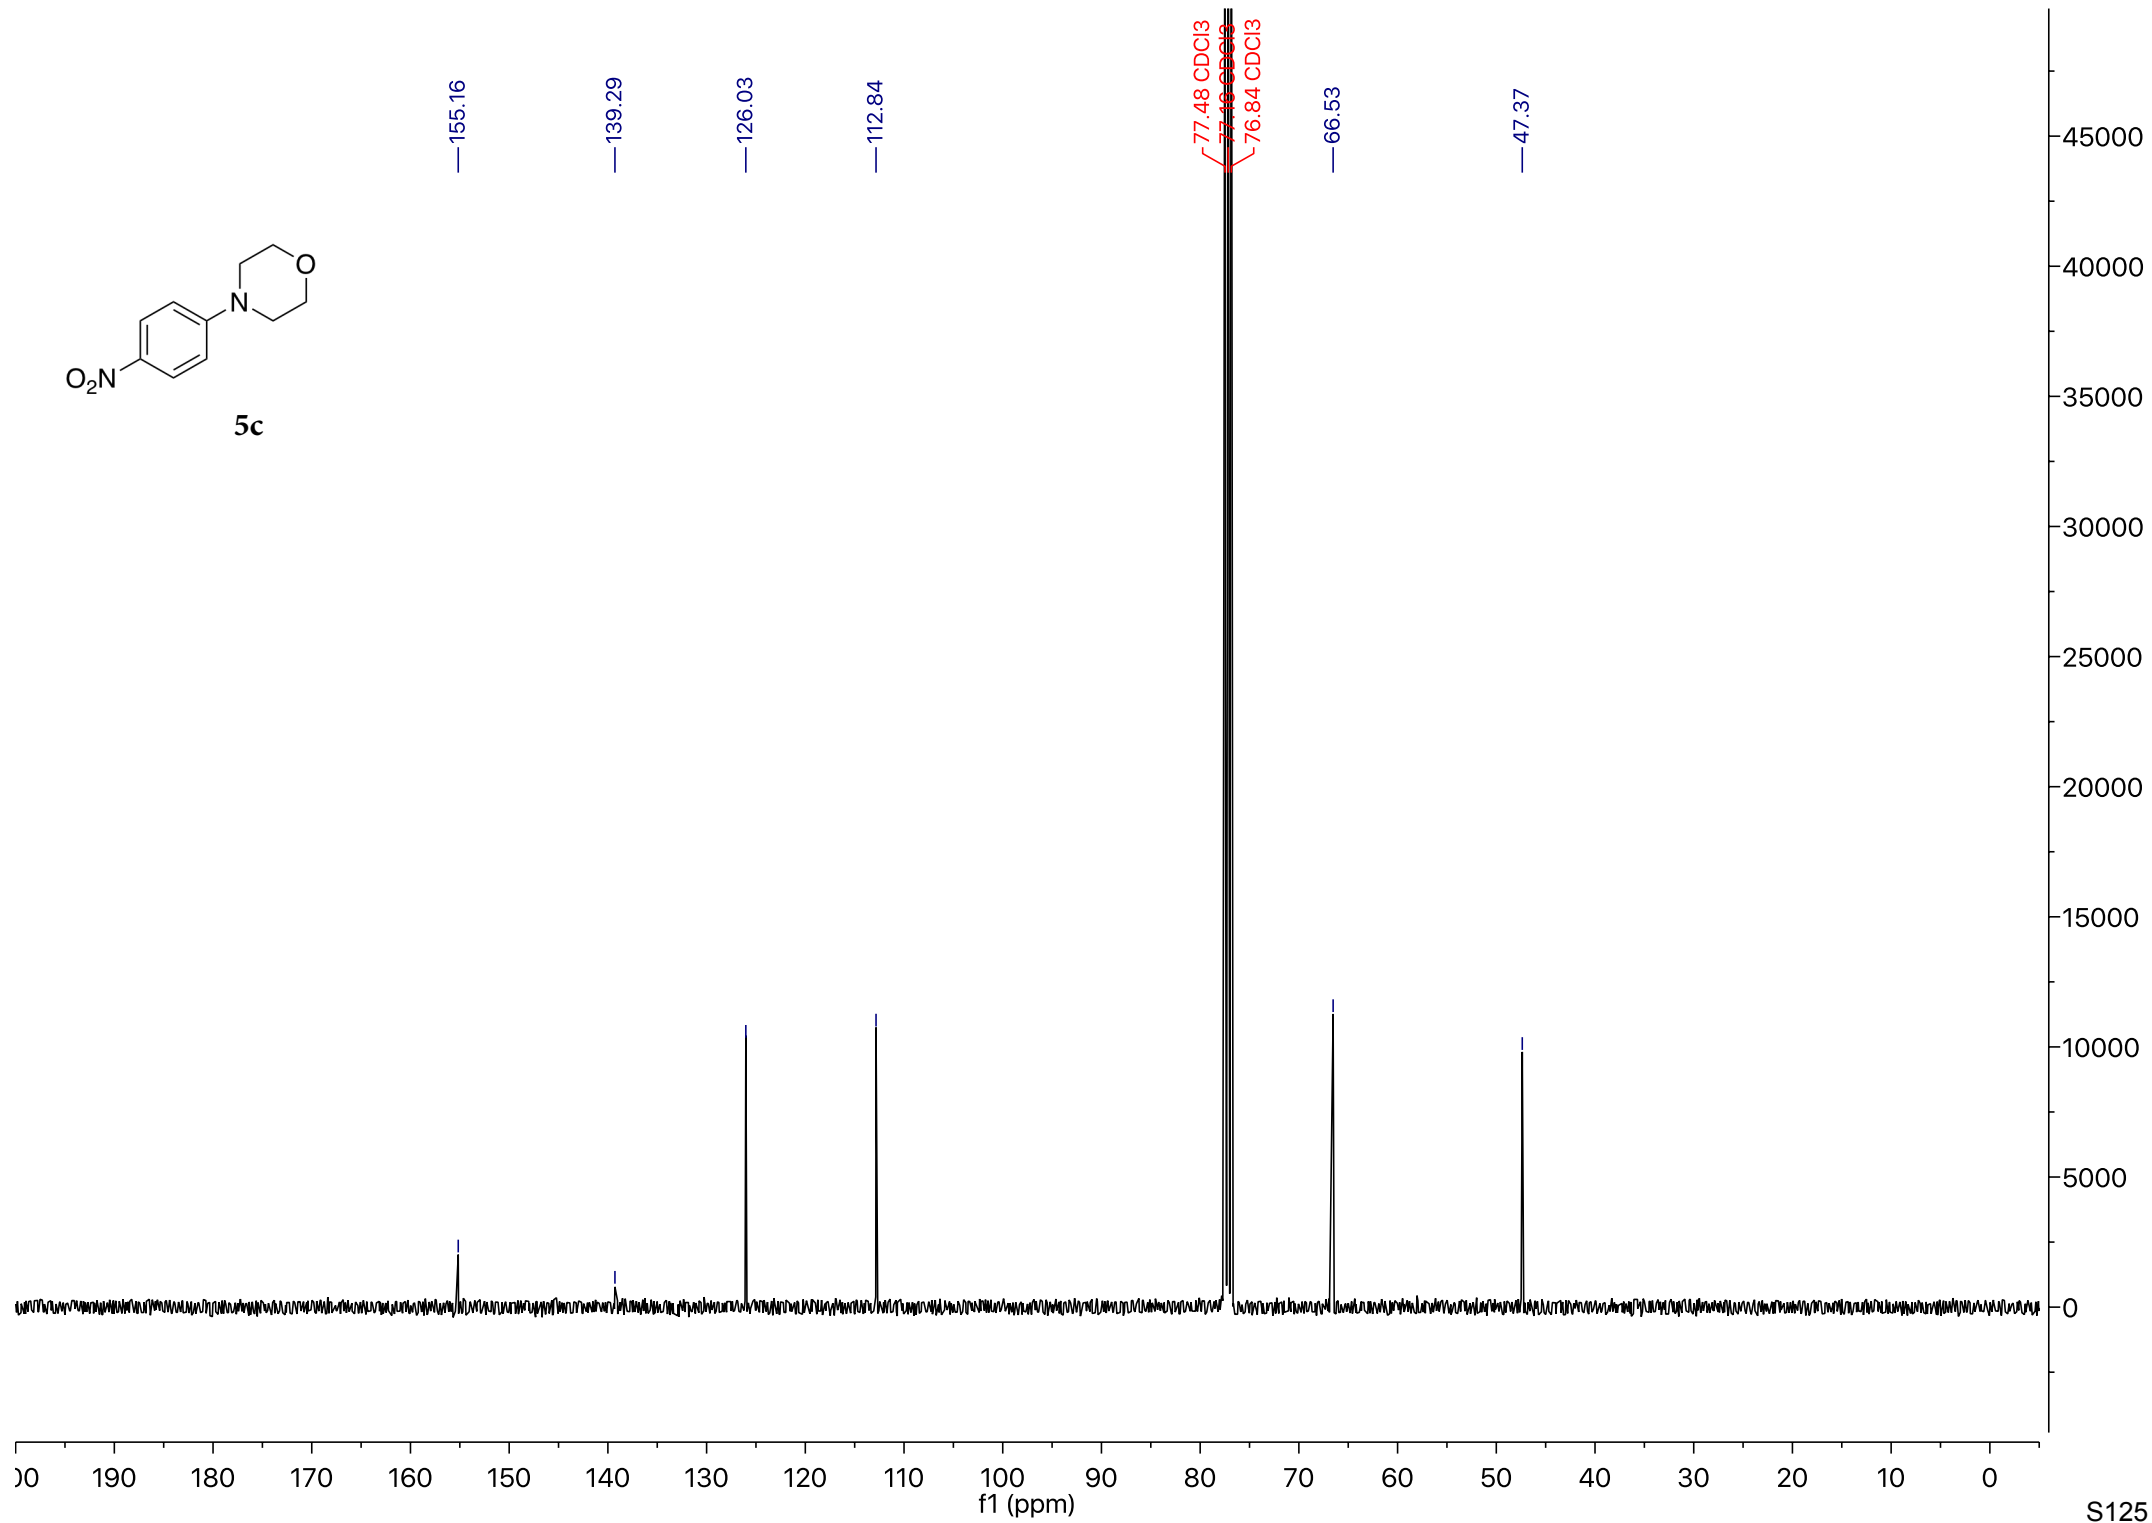

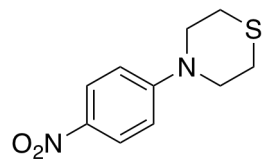

5d

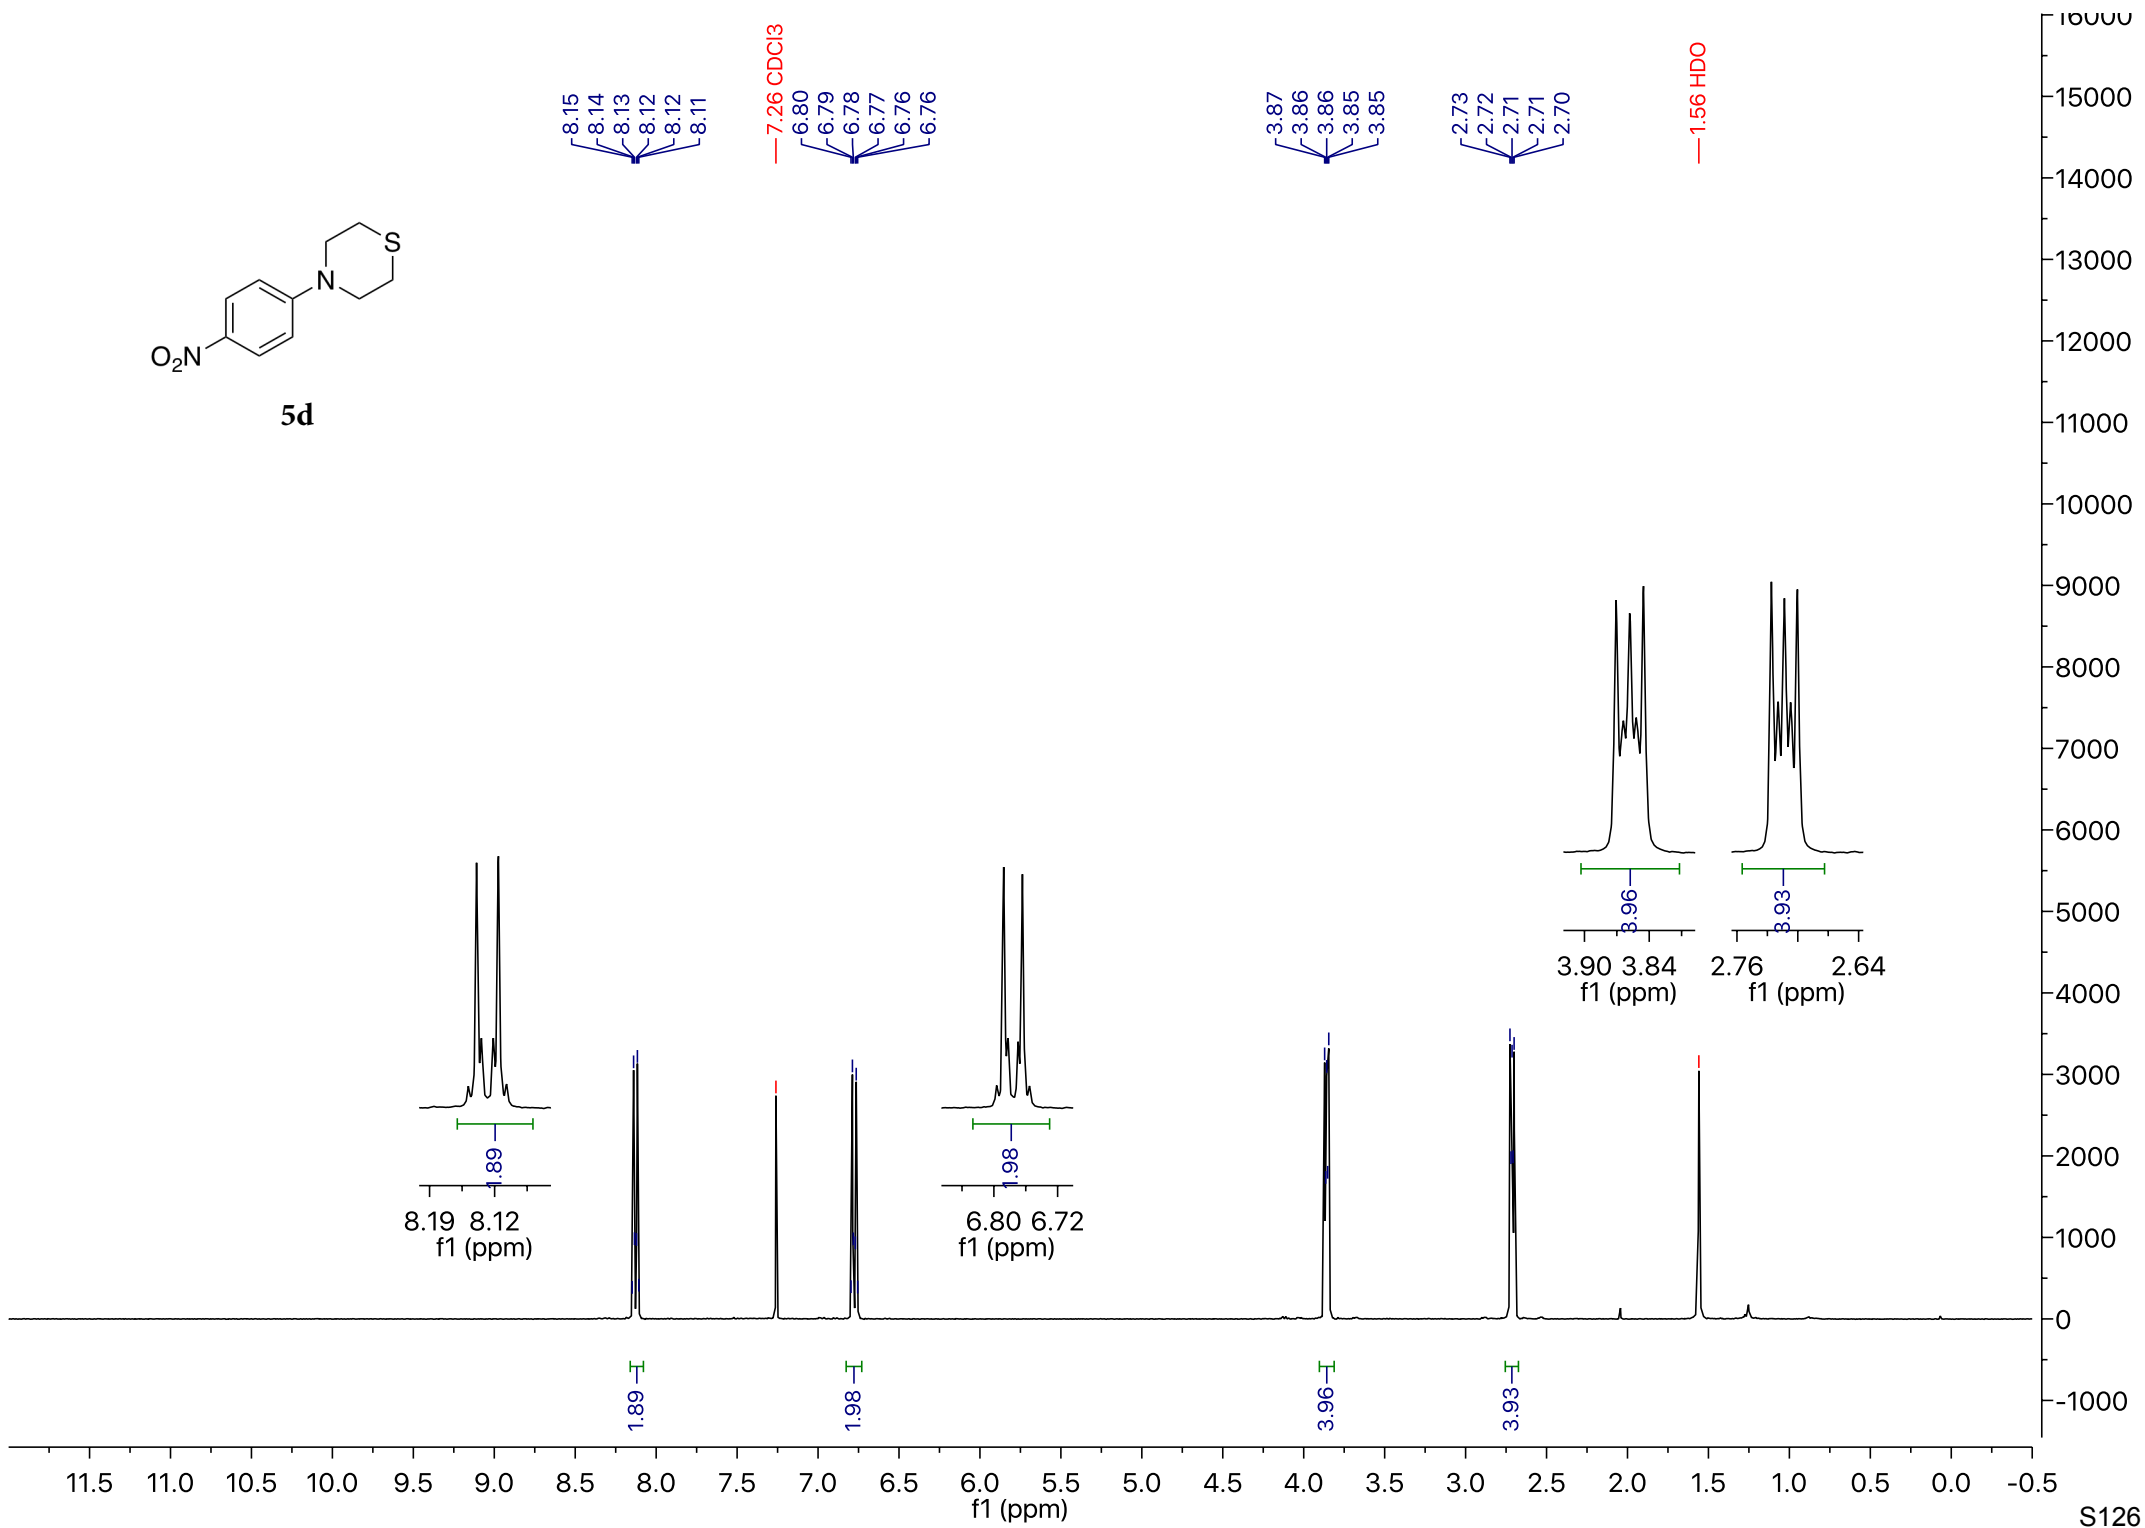

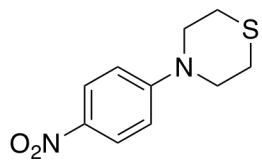

5d

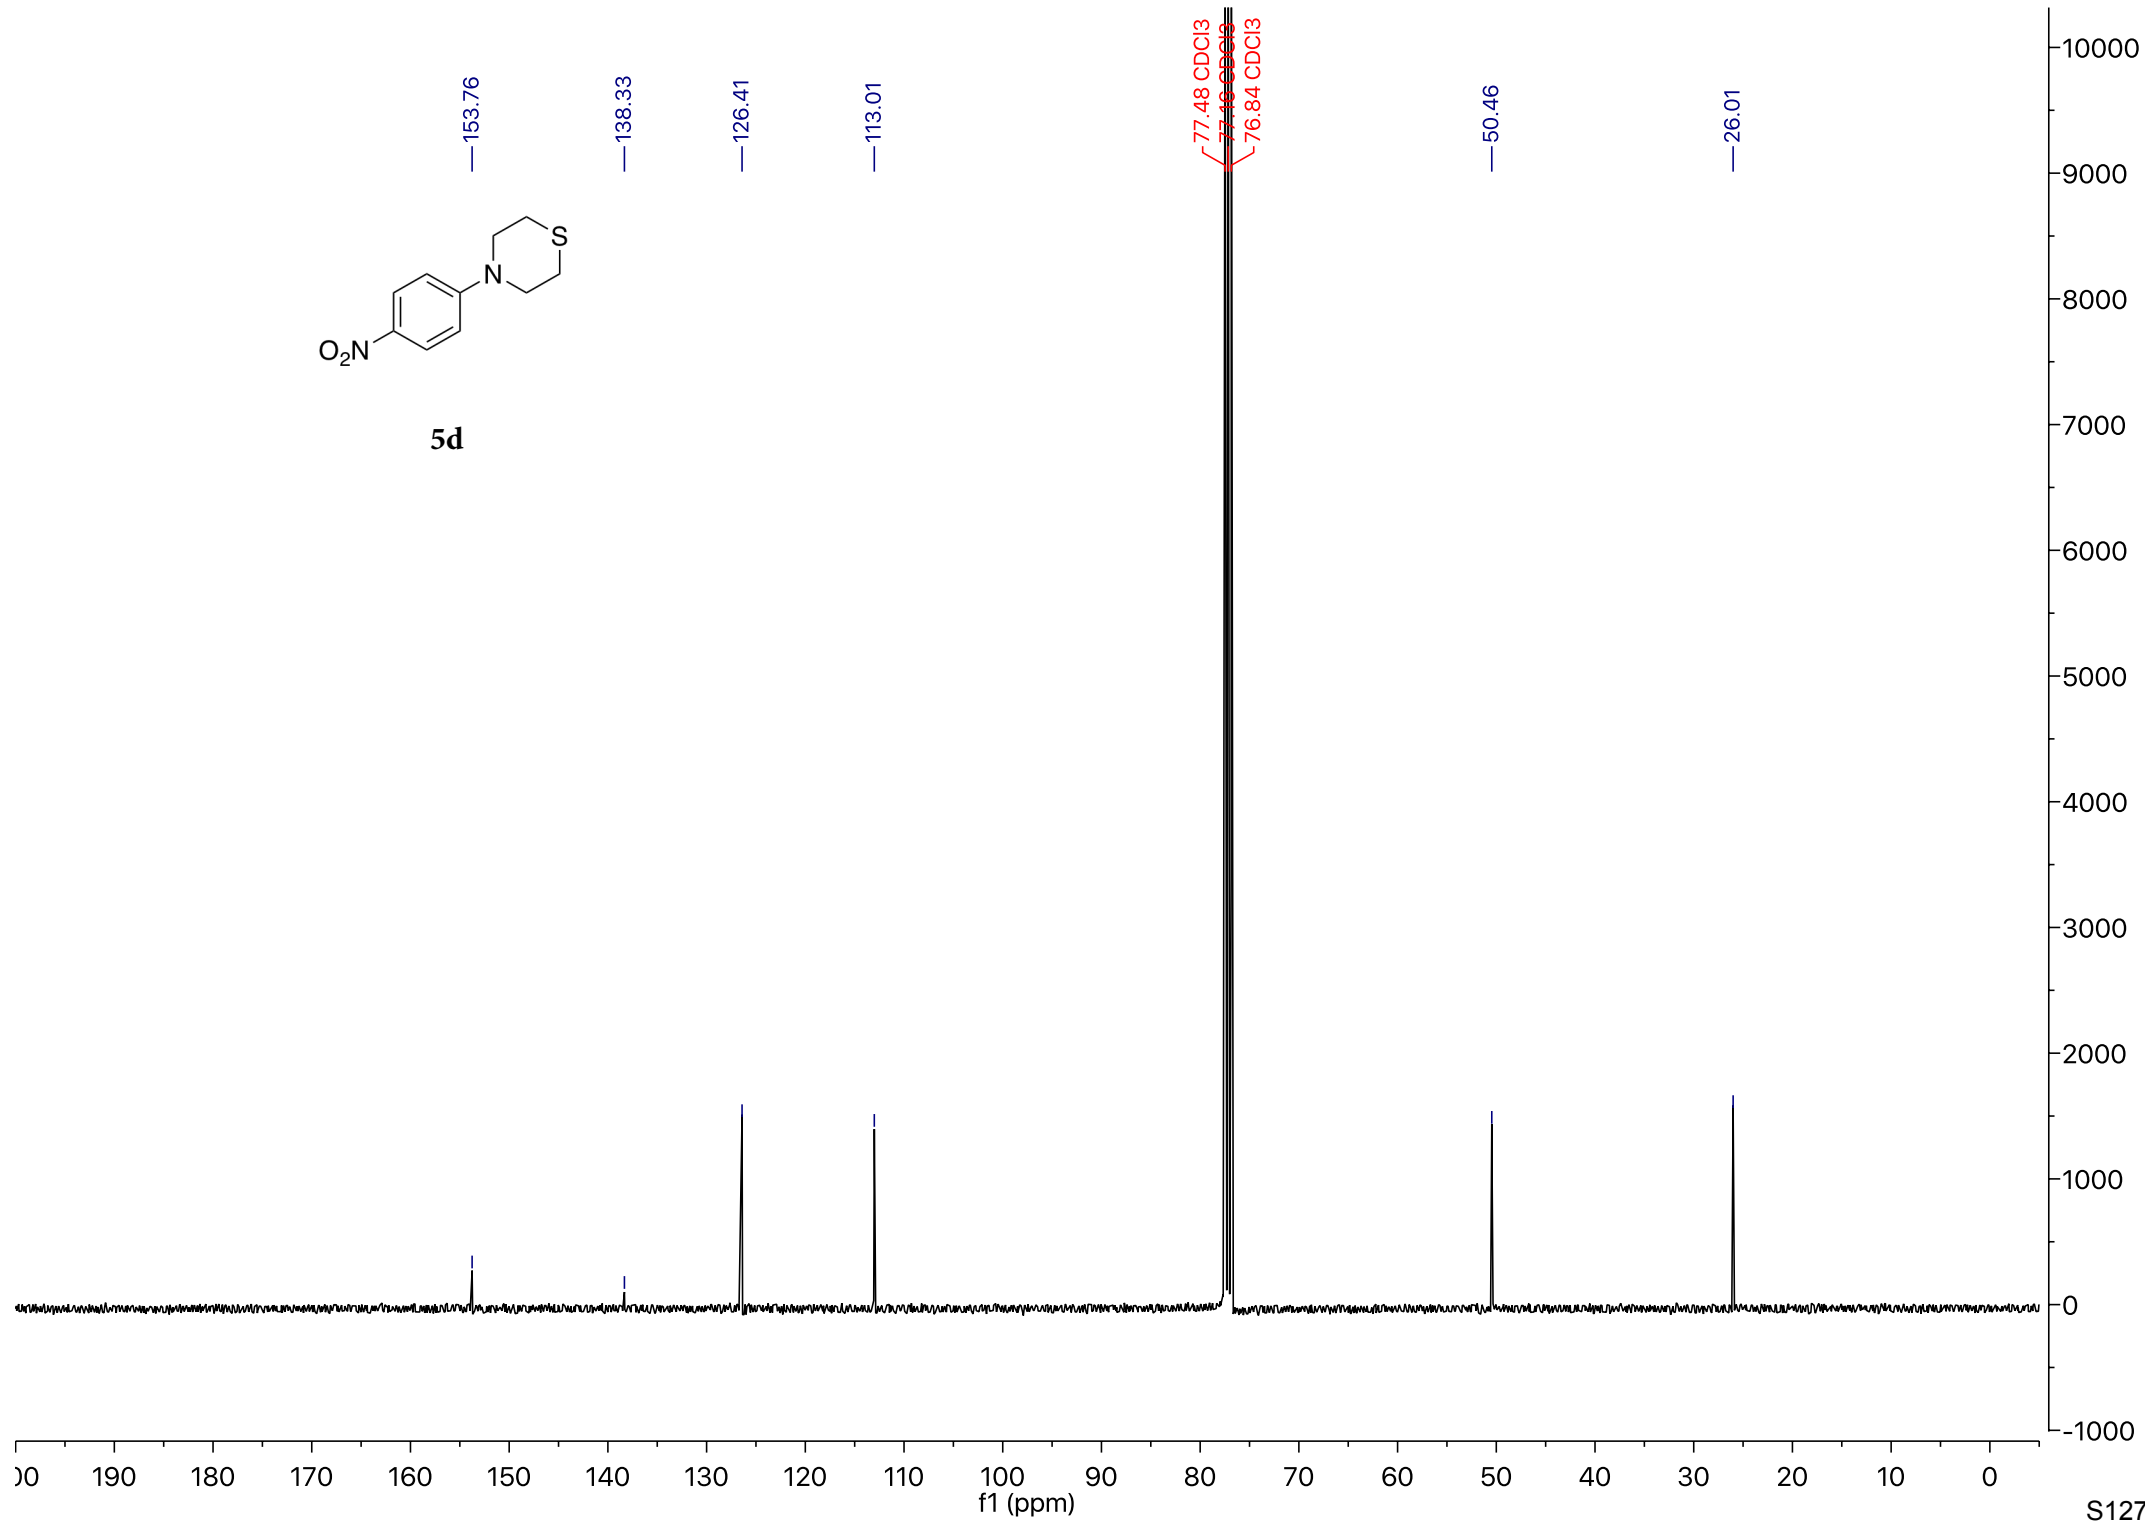

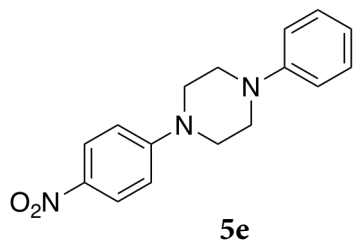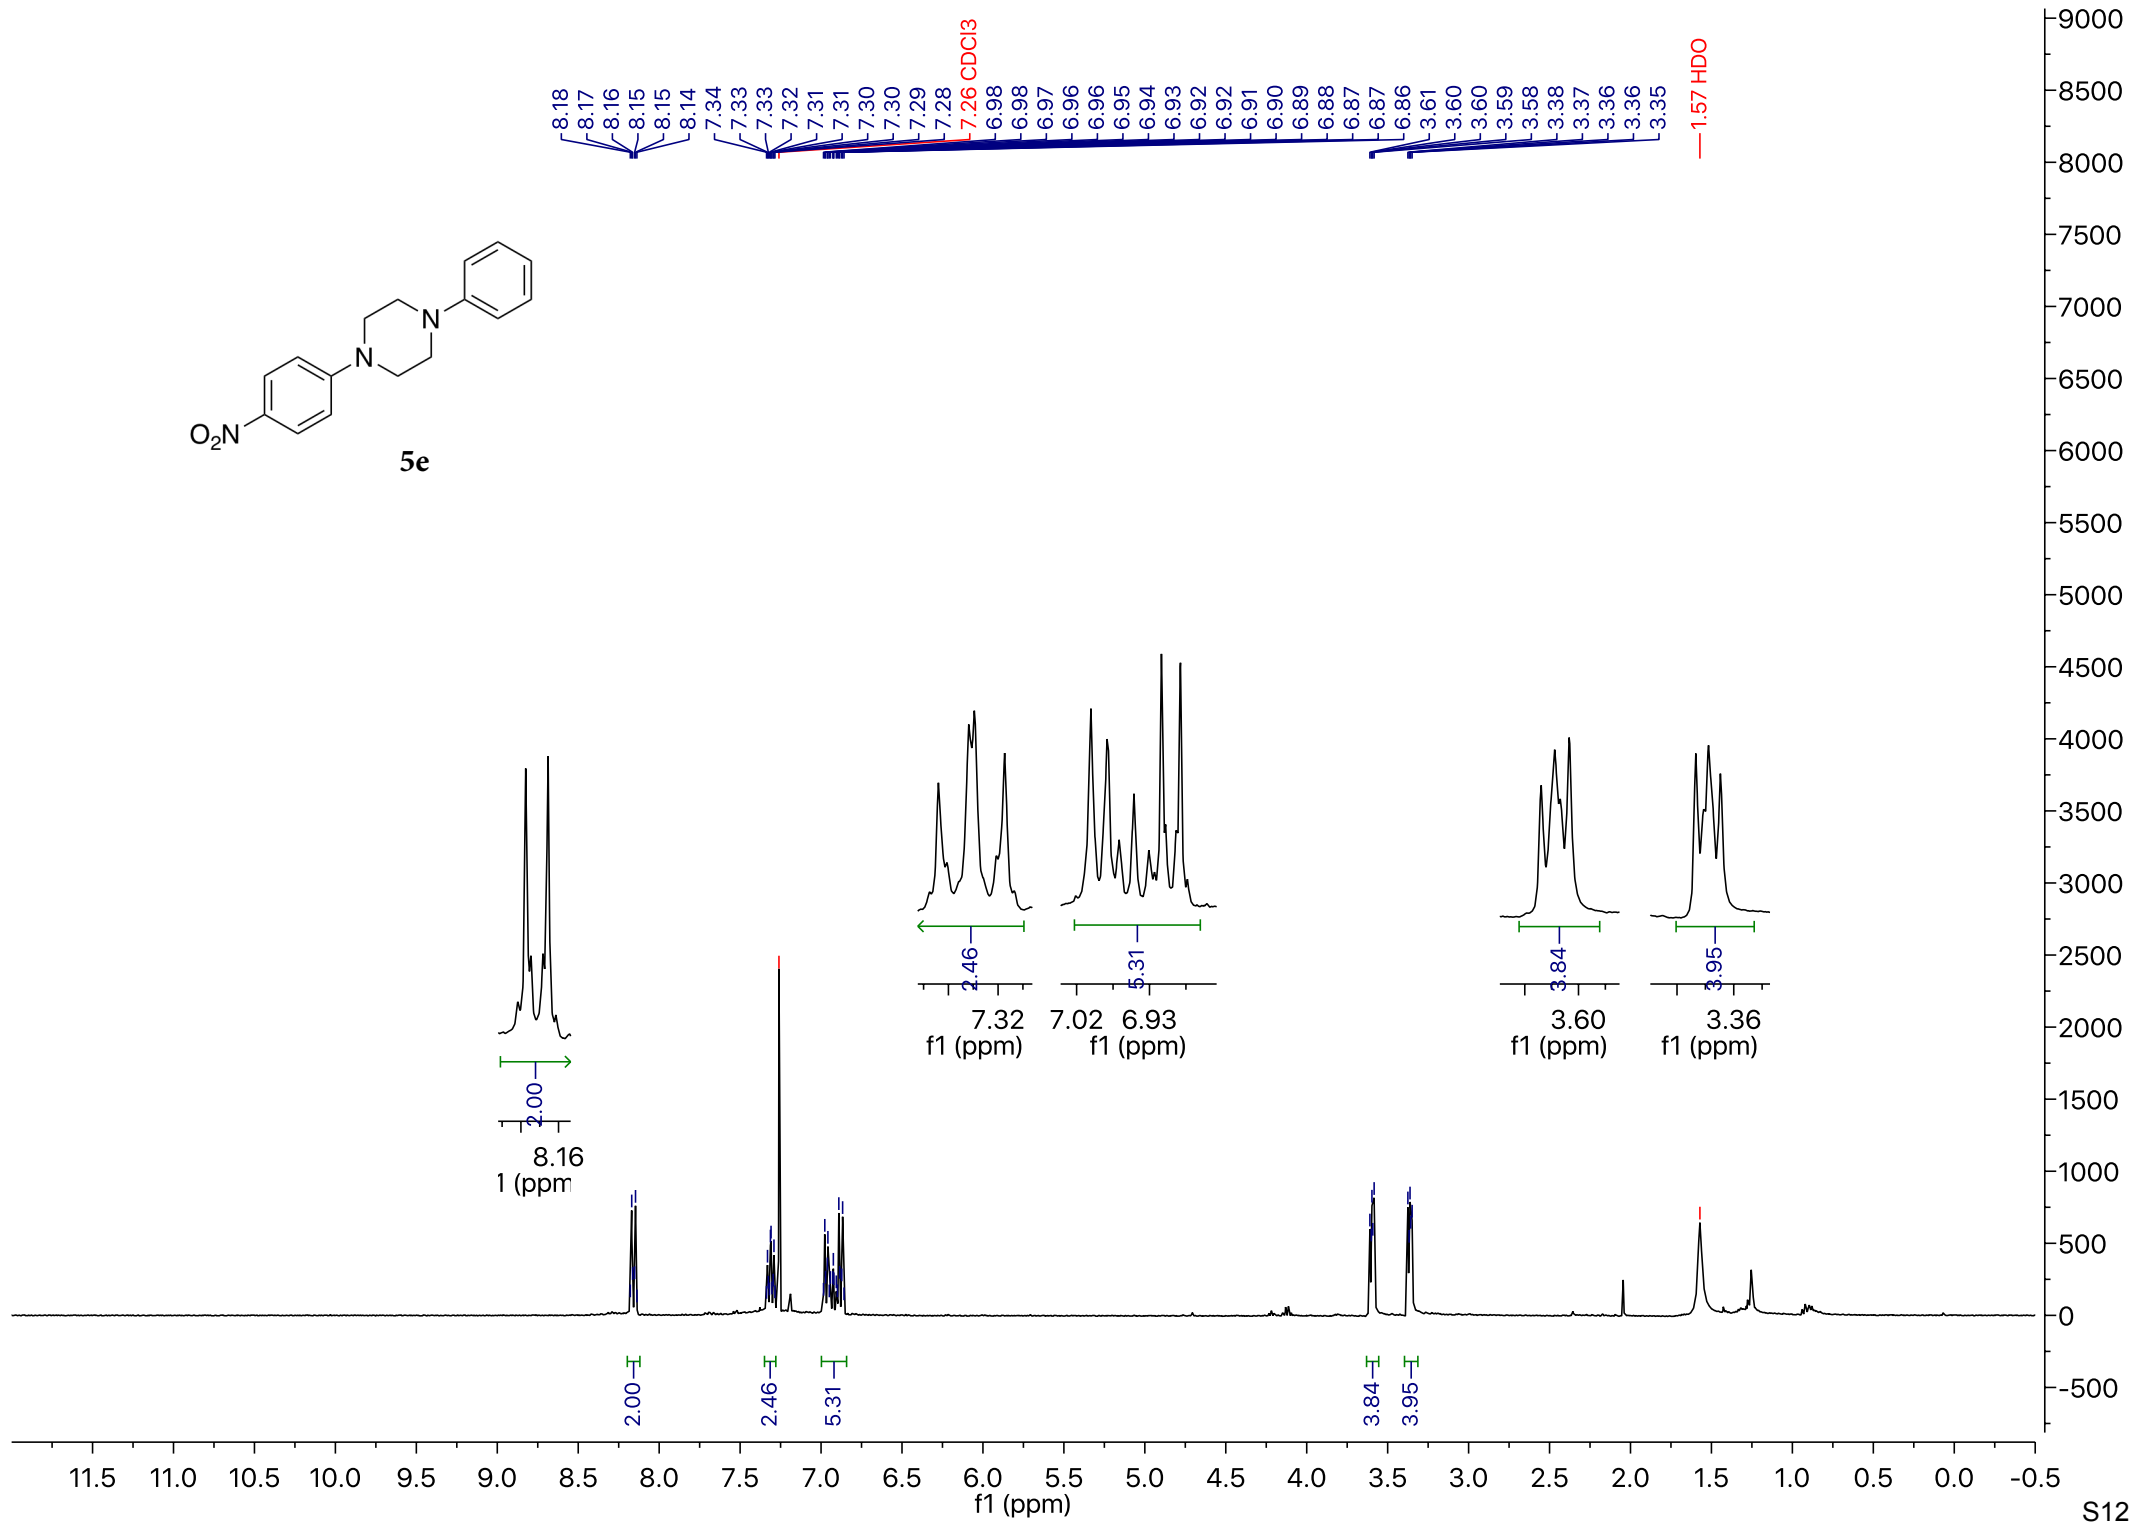

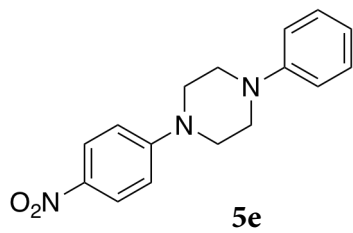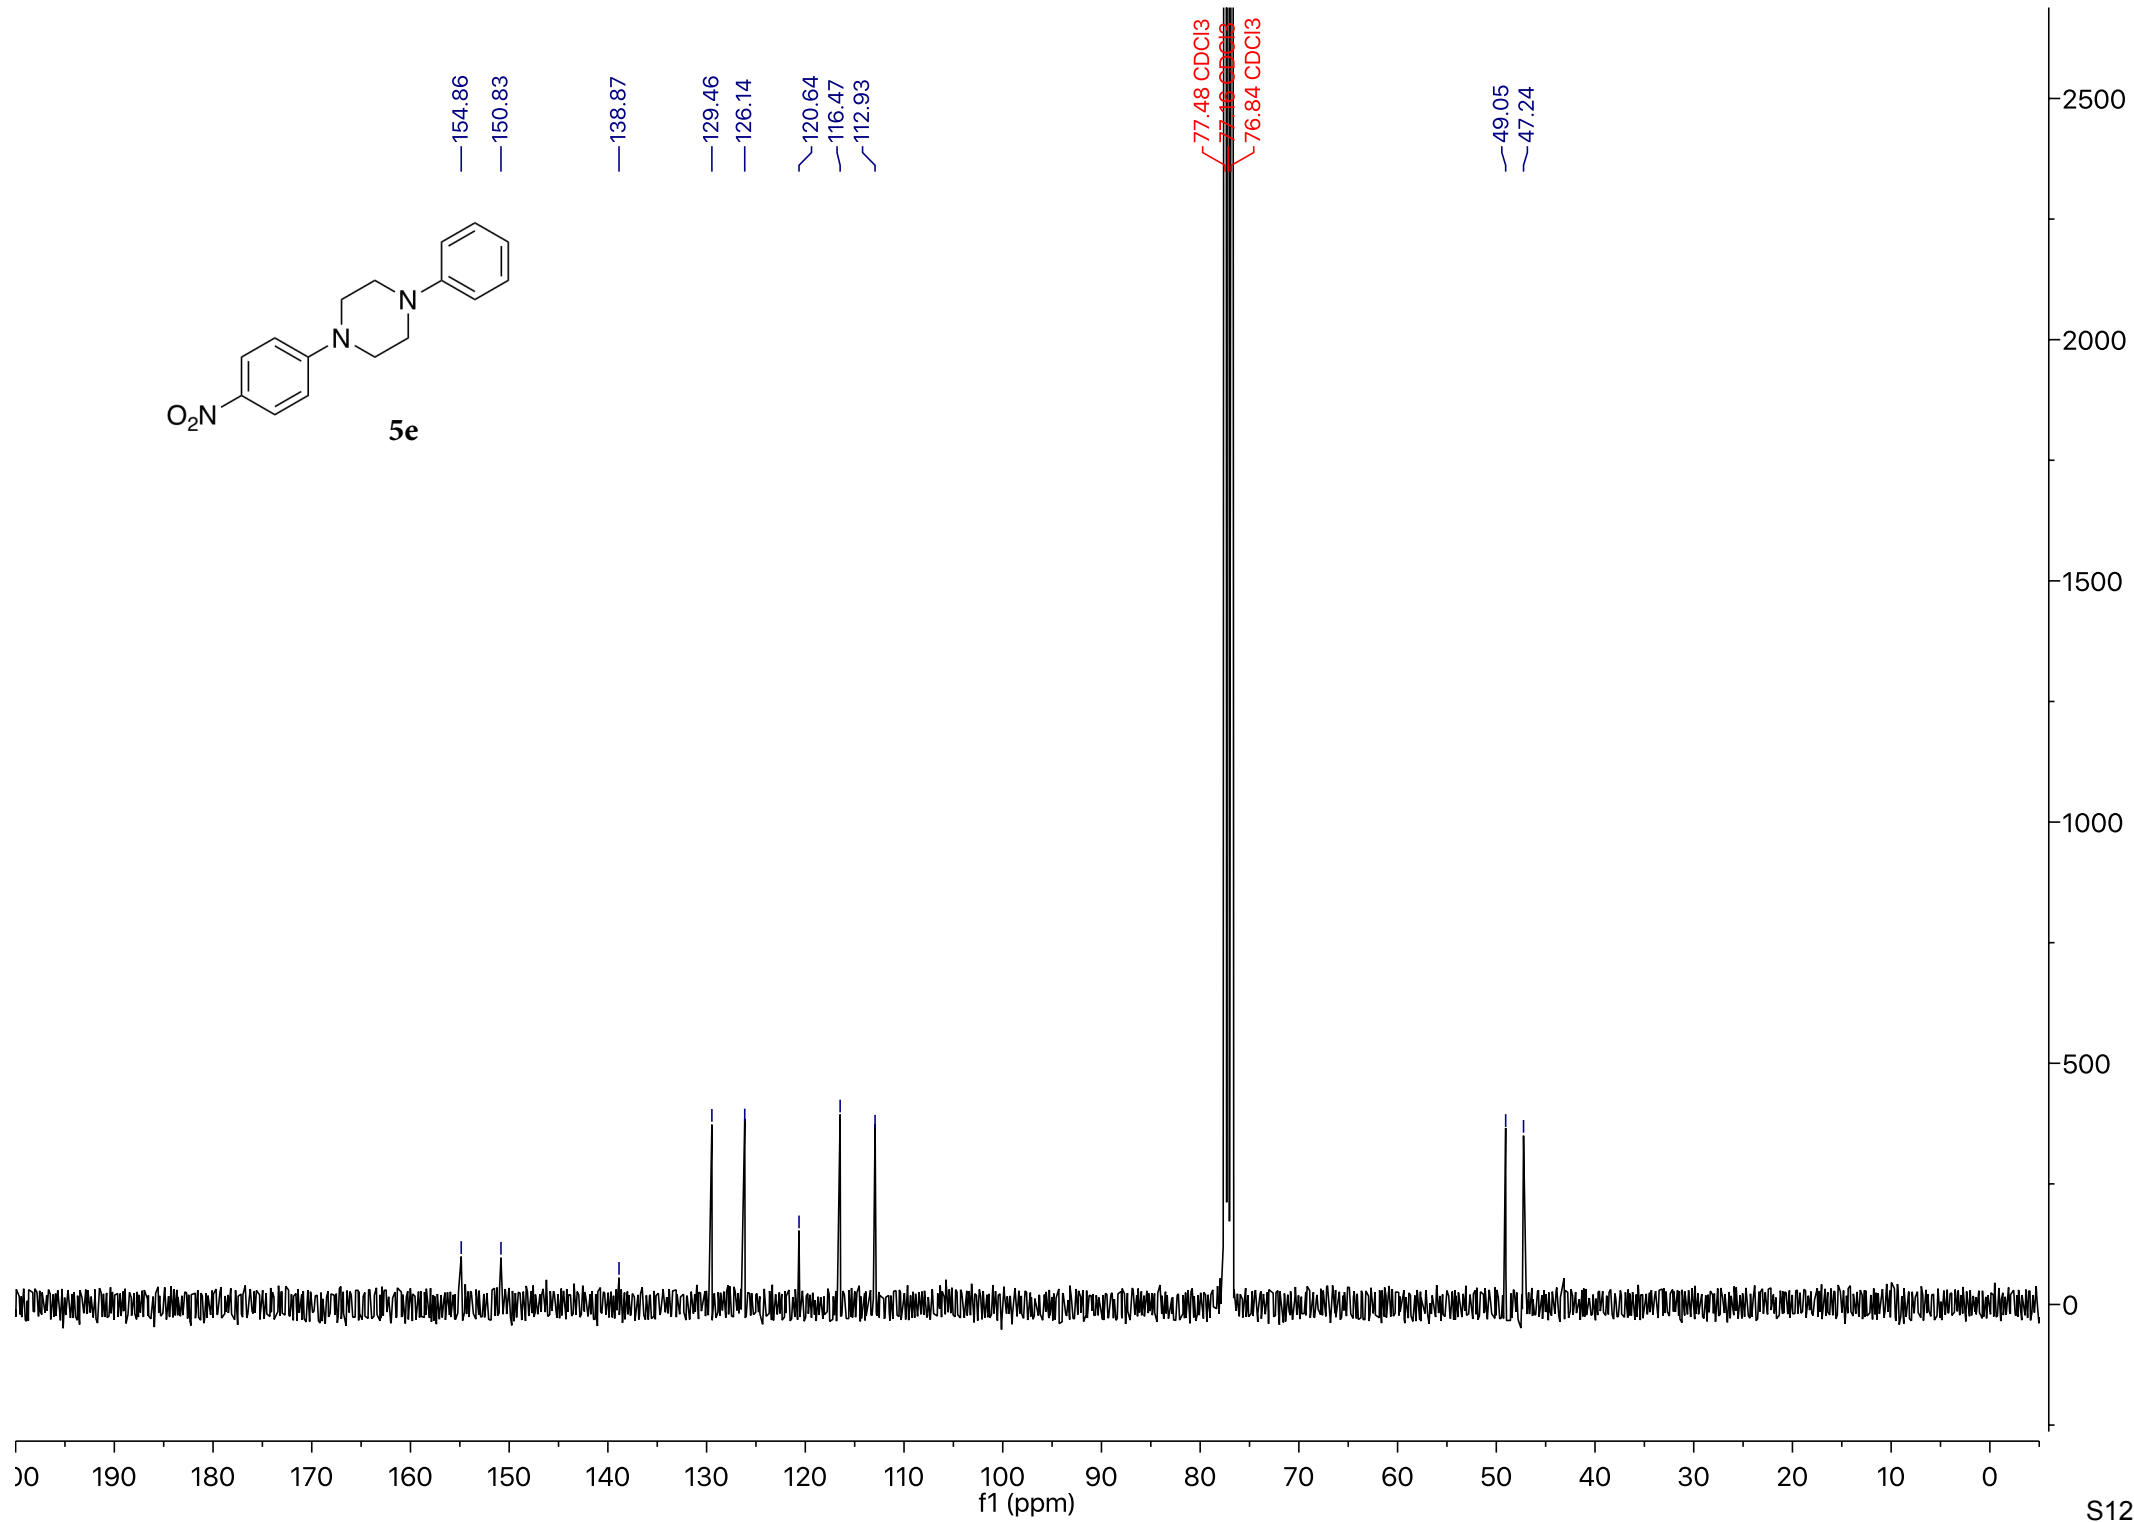

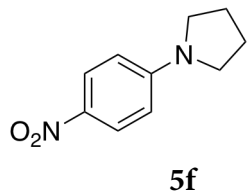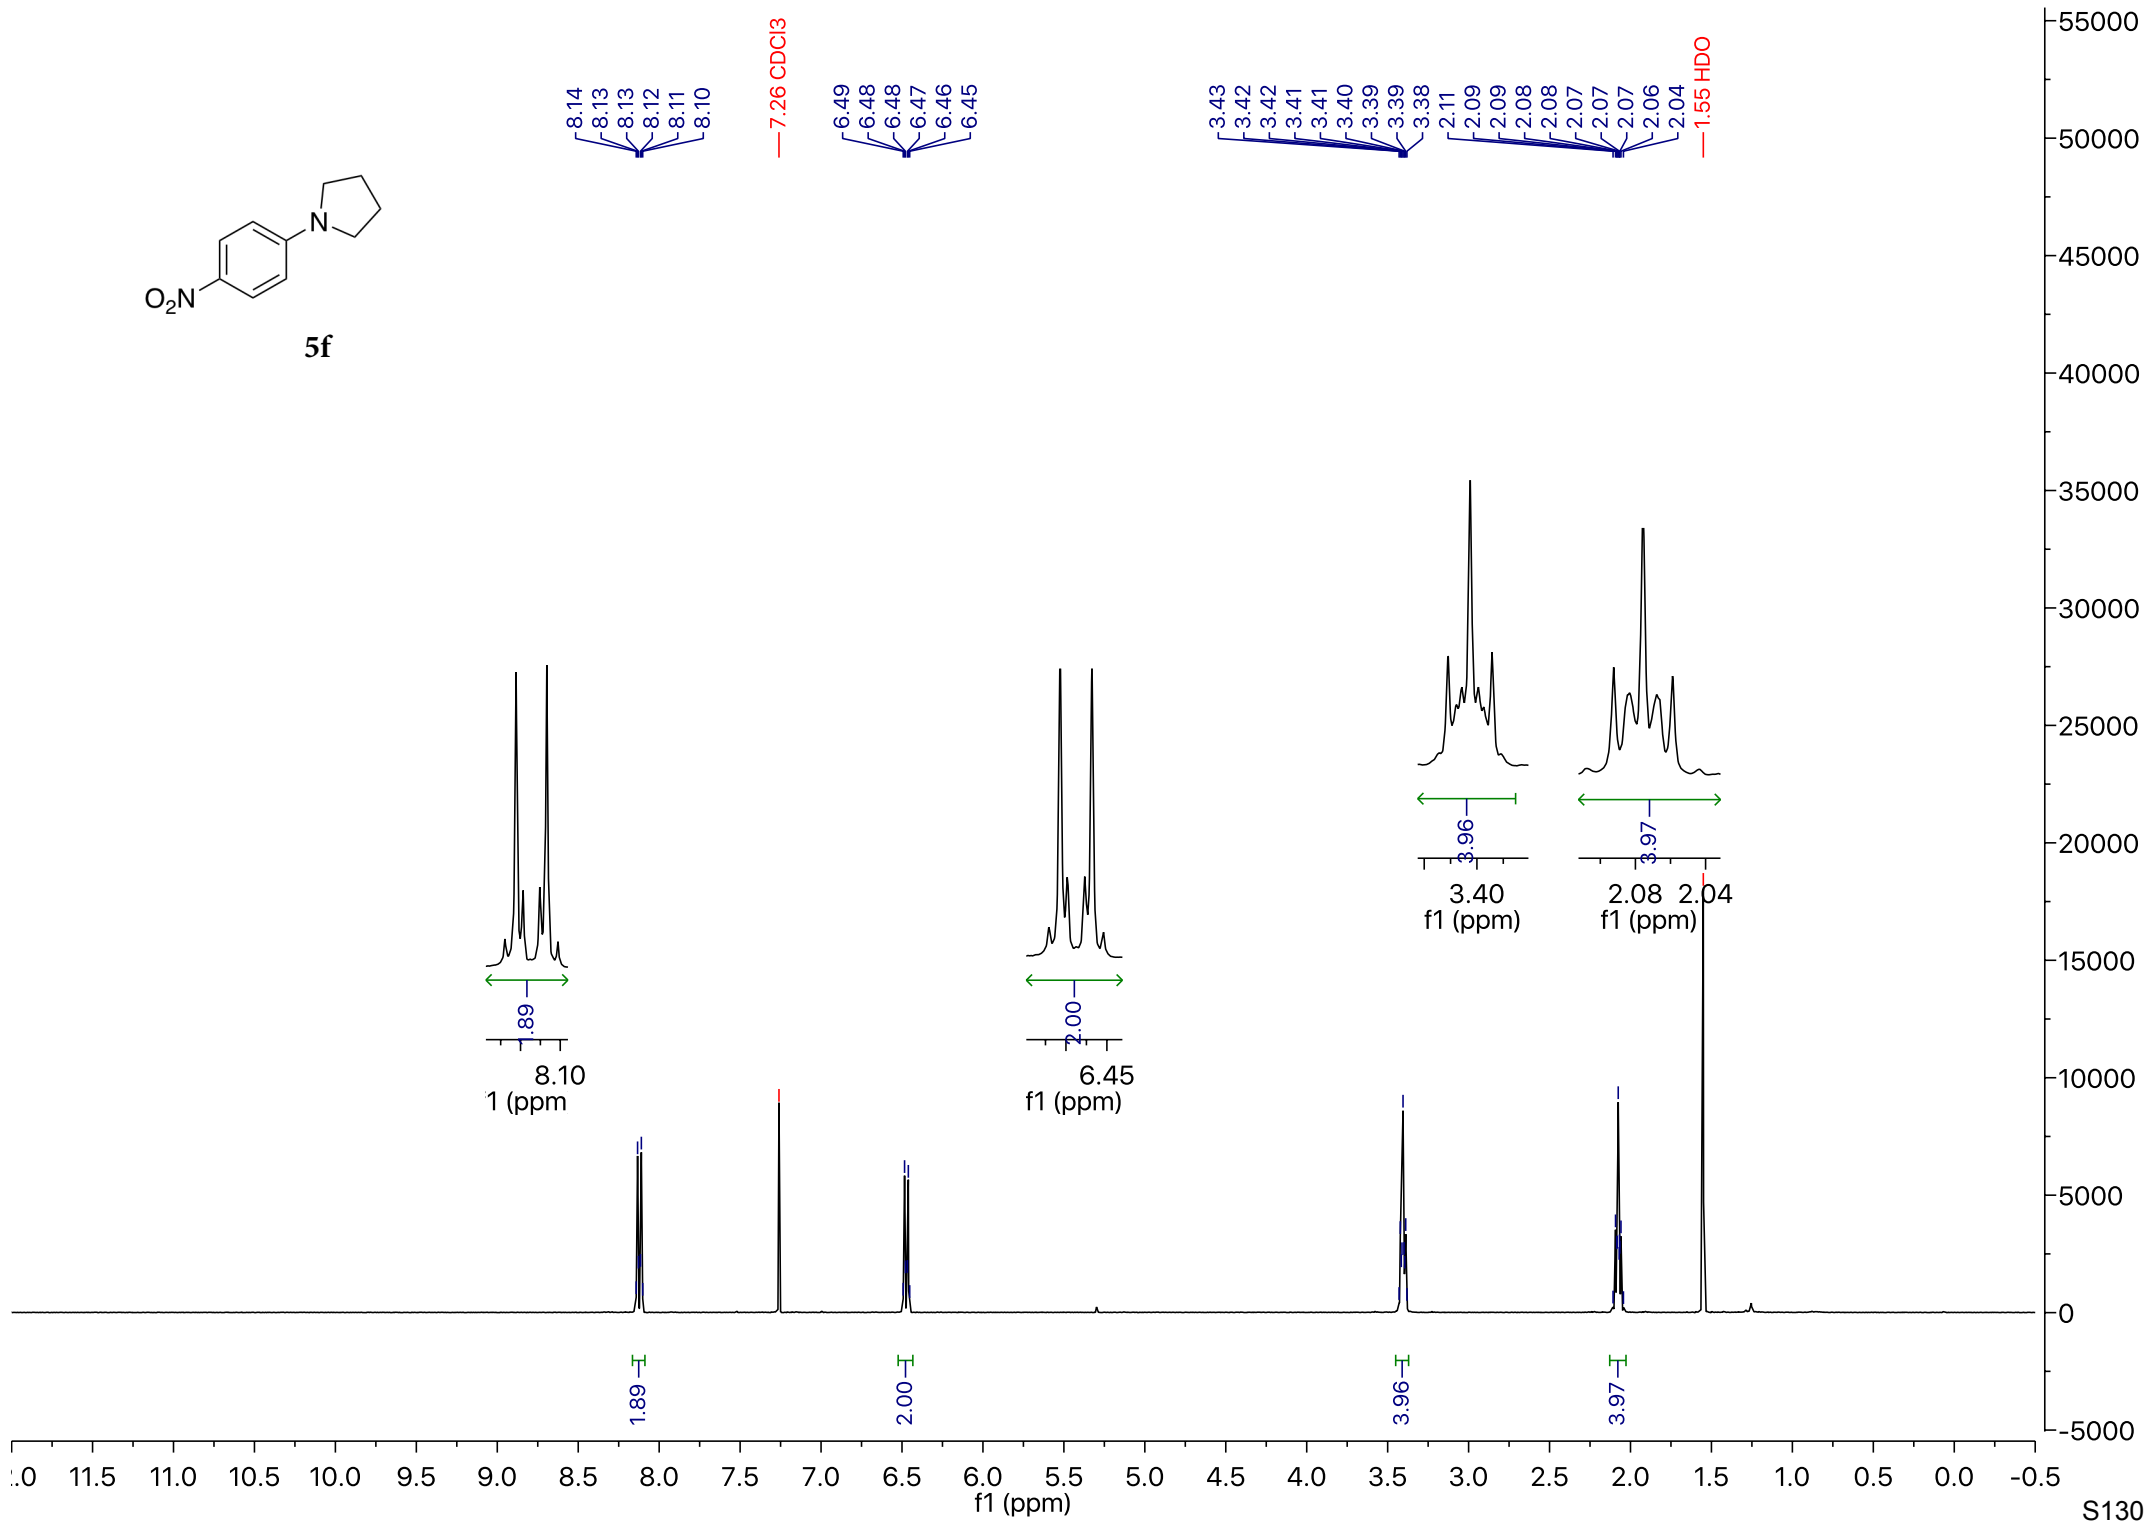

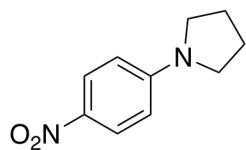

5f

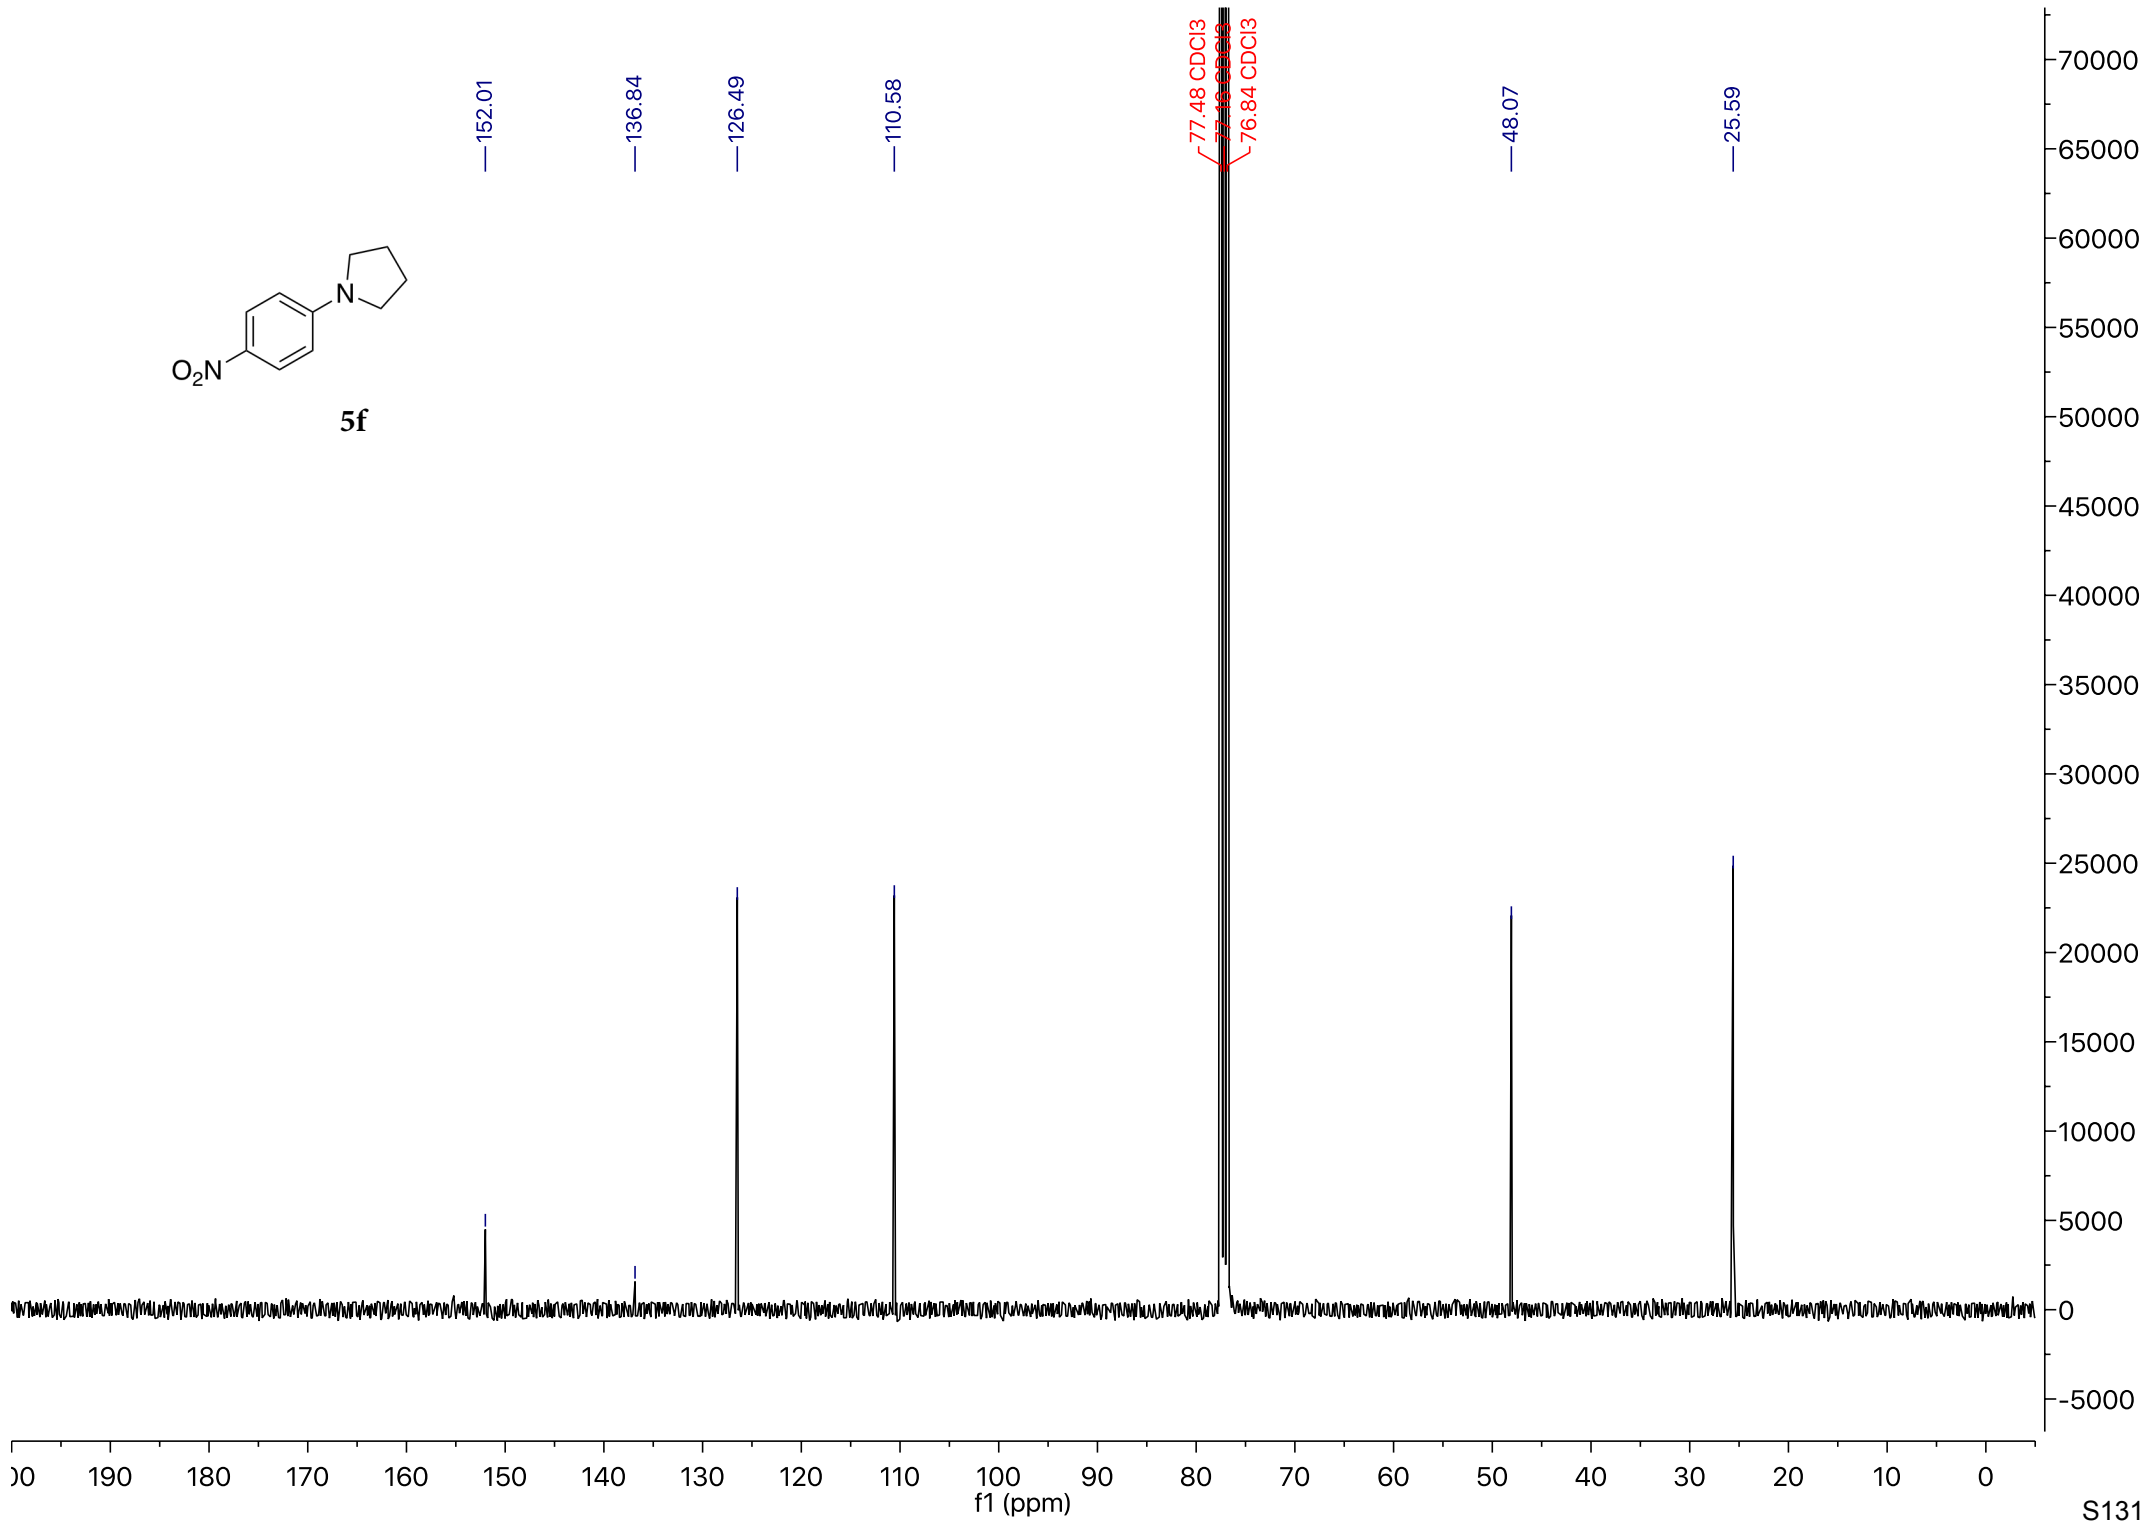



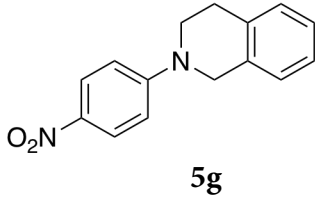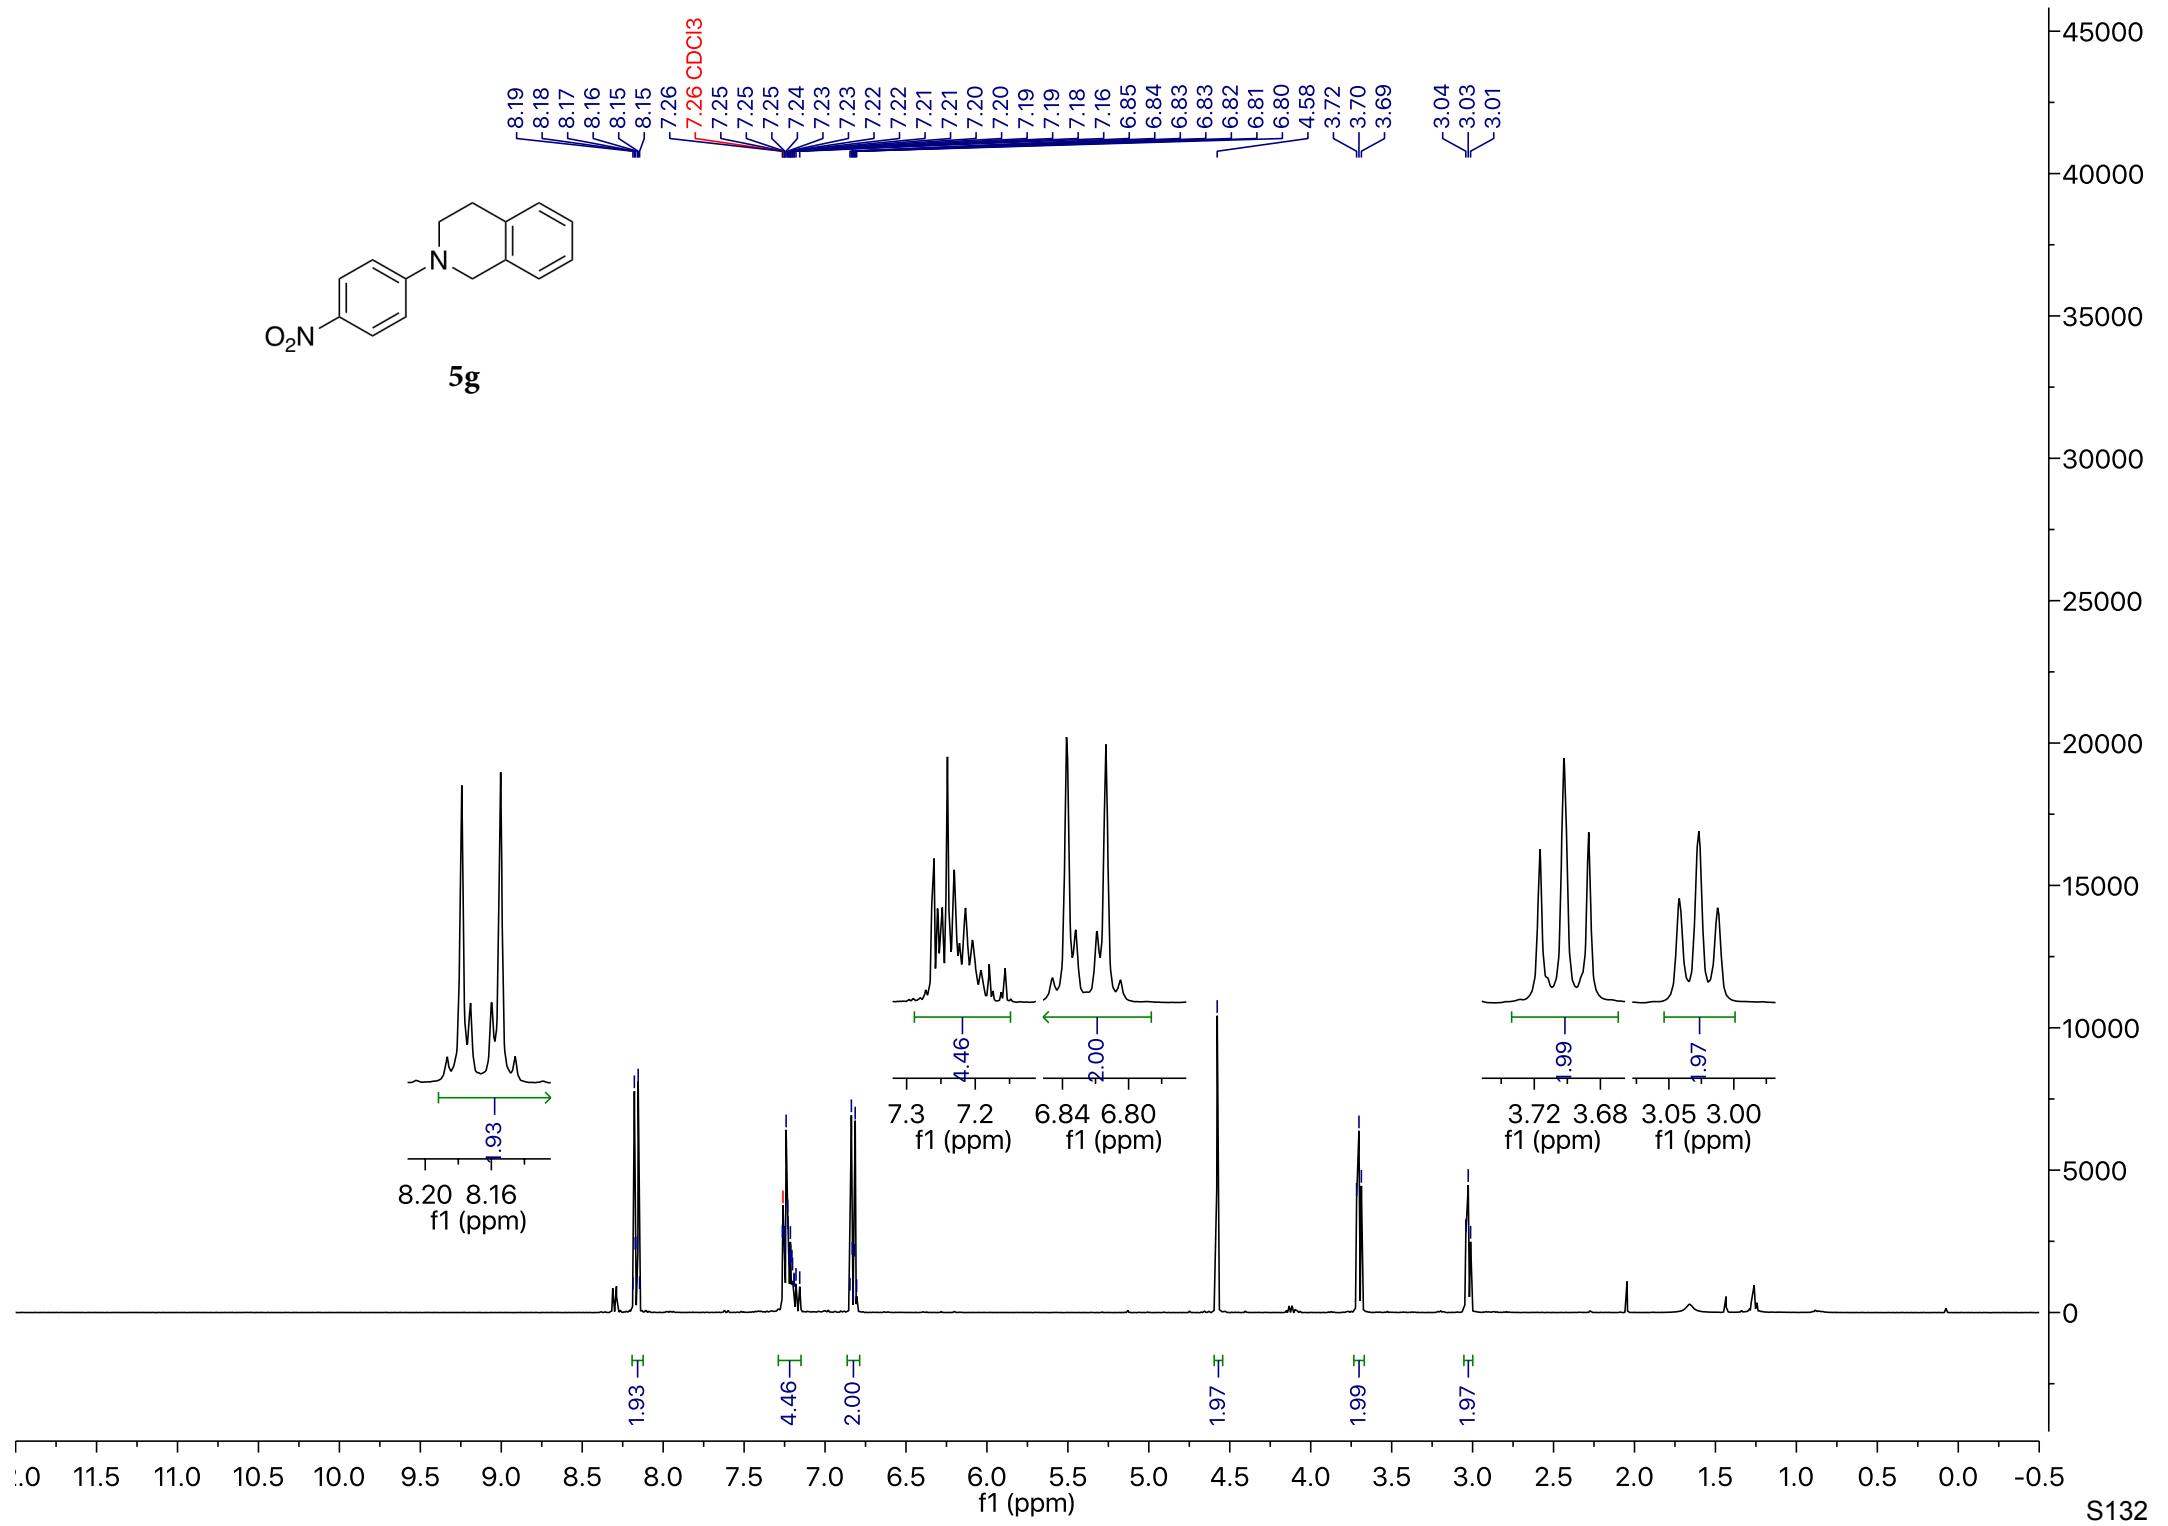

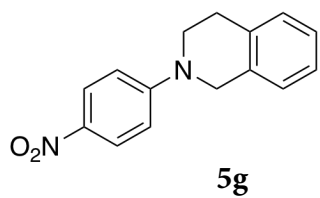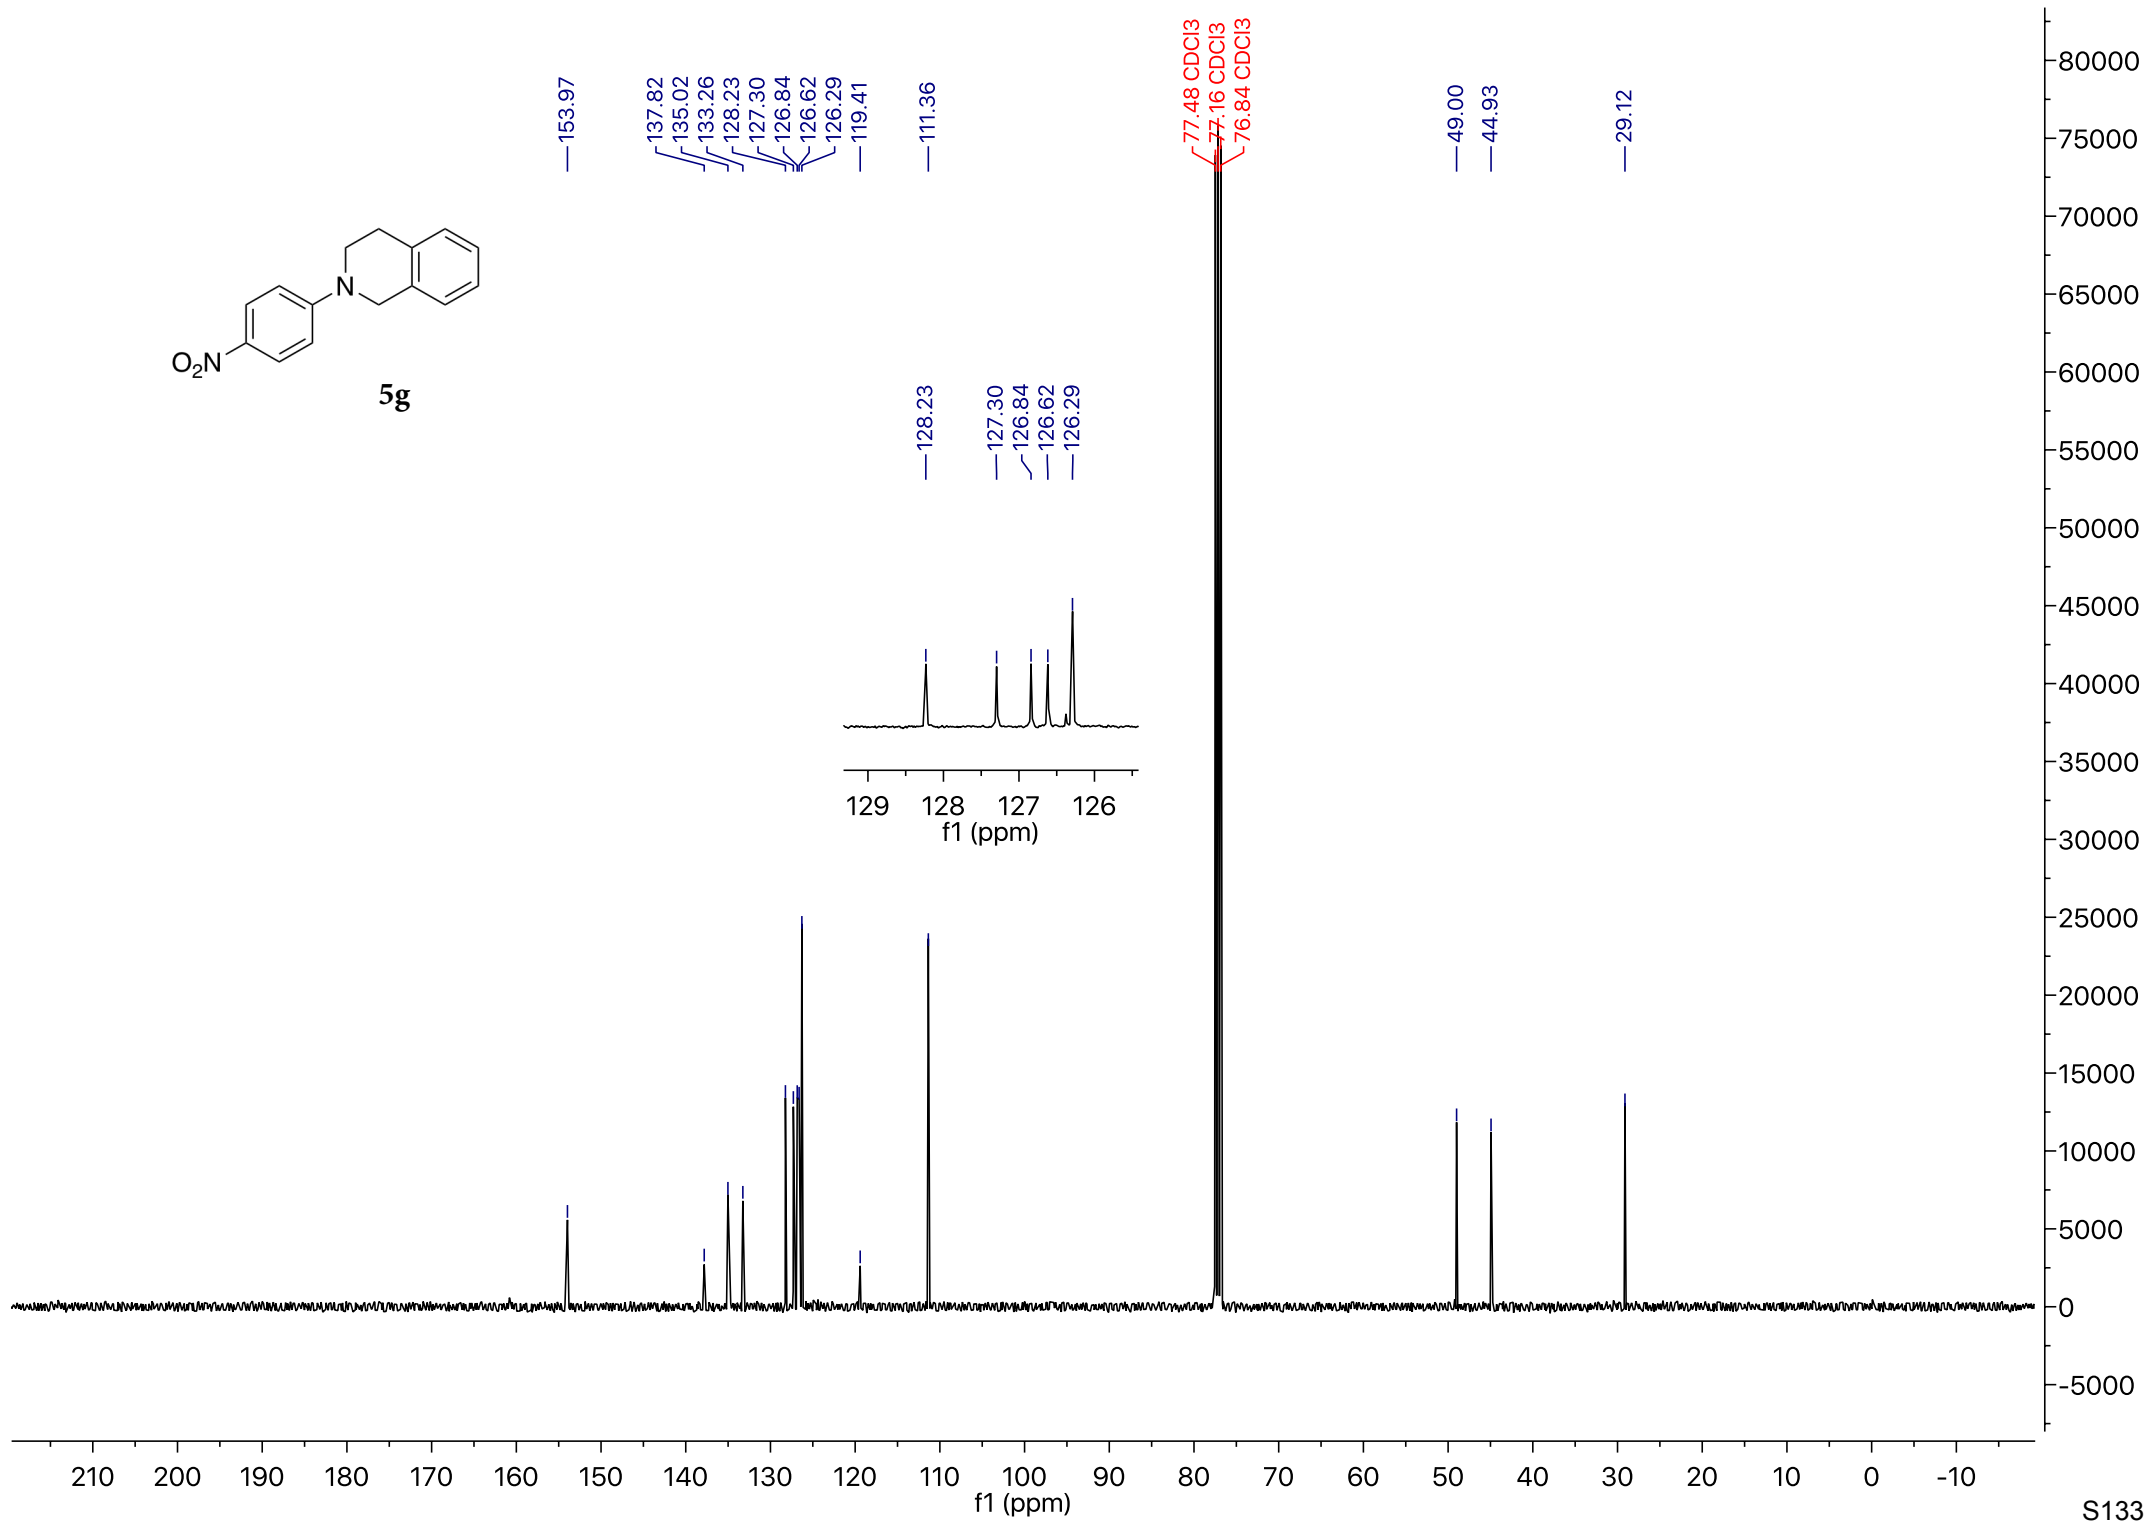

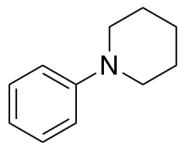

5h

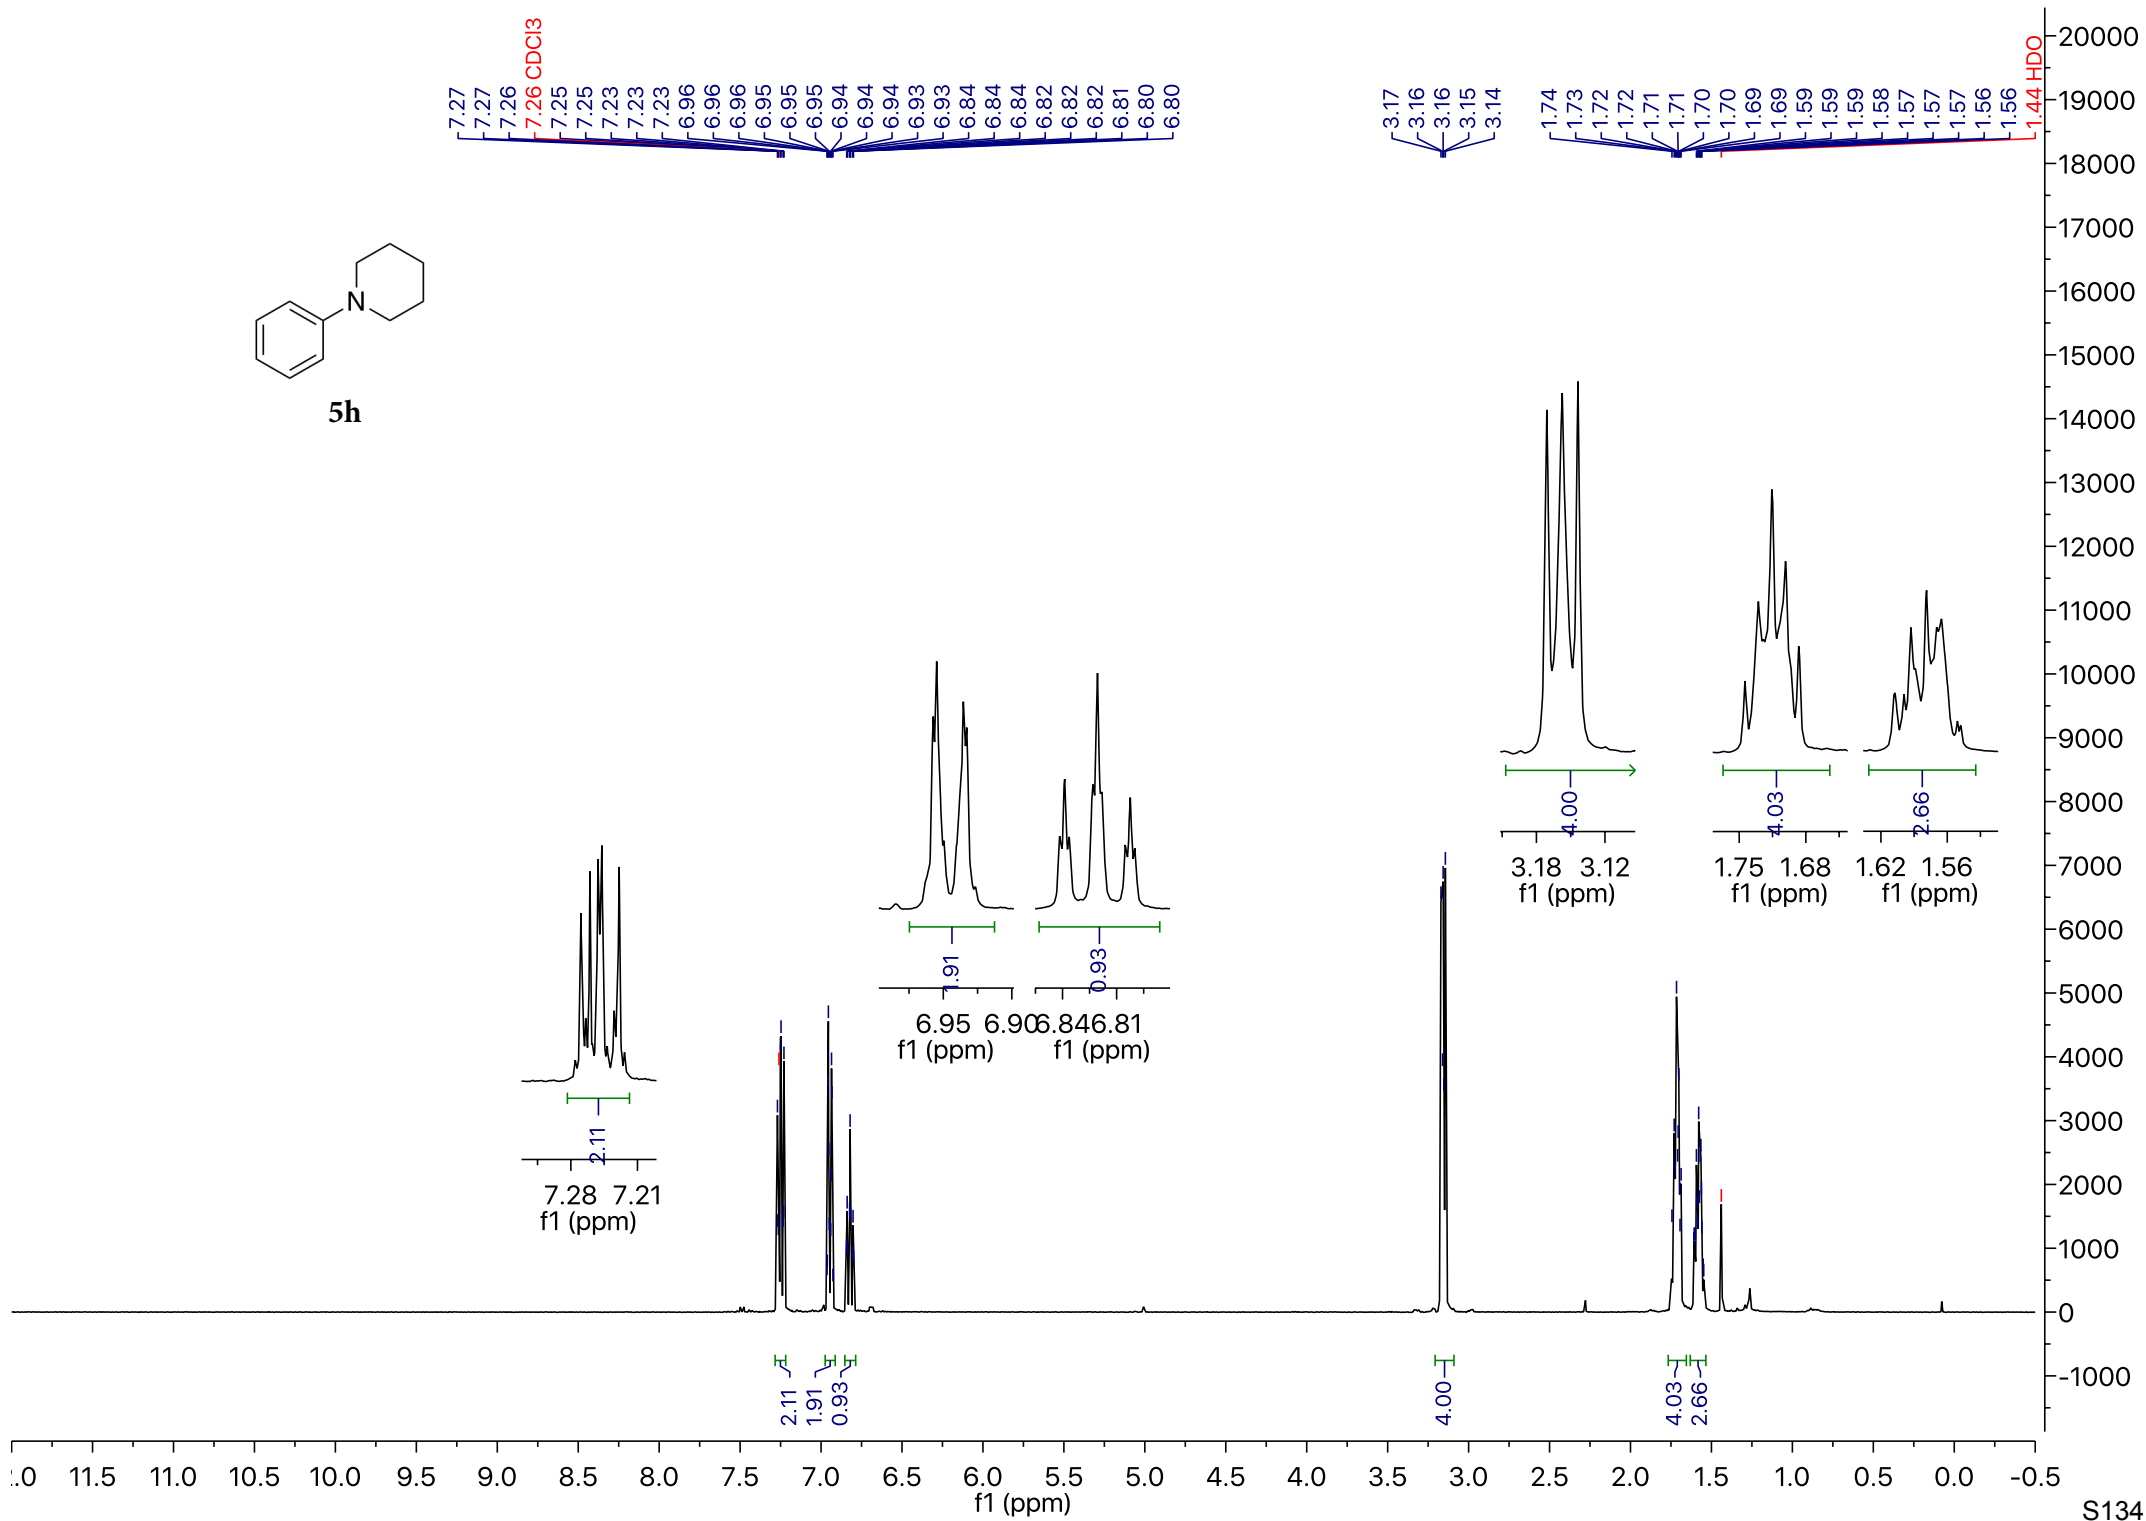

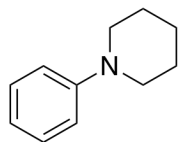

**5h**

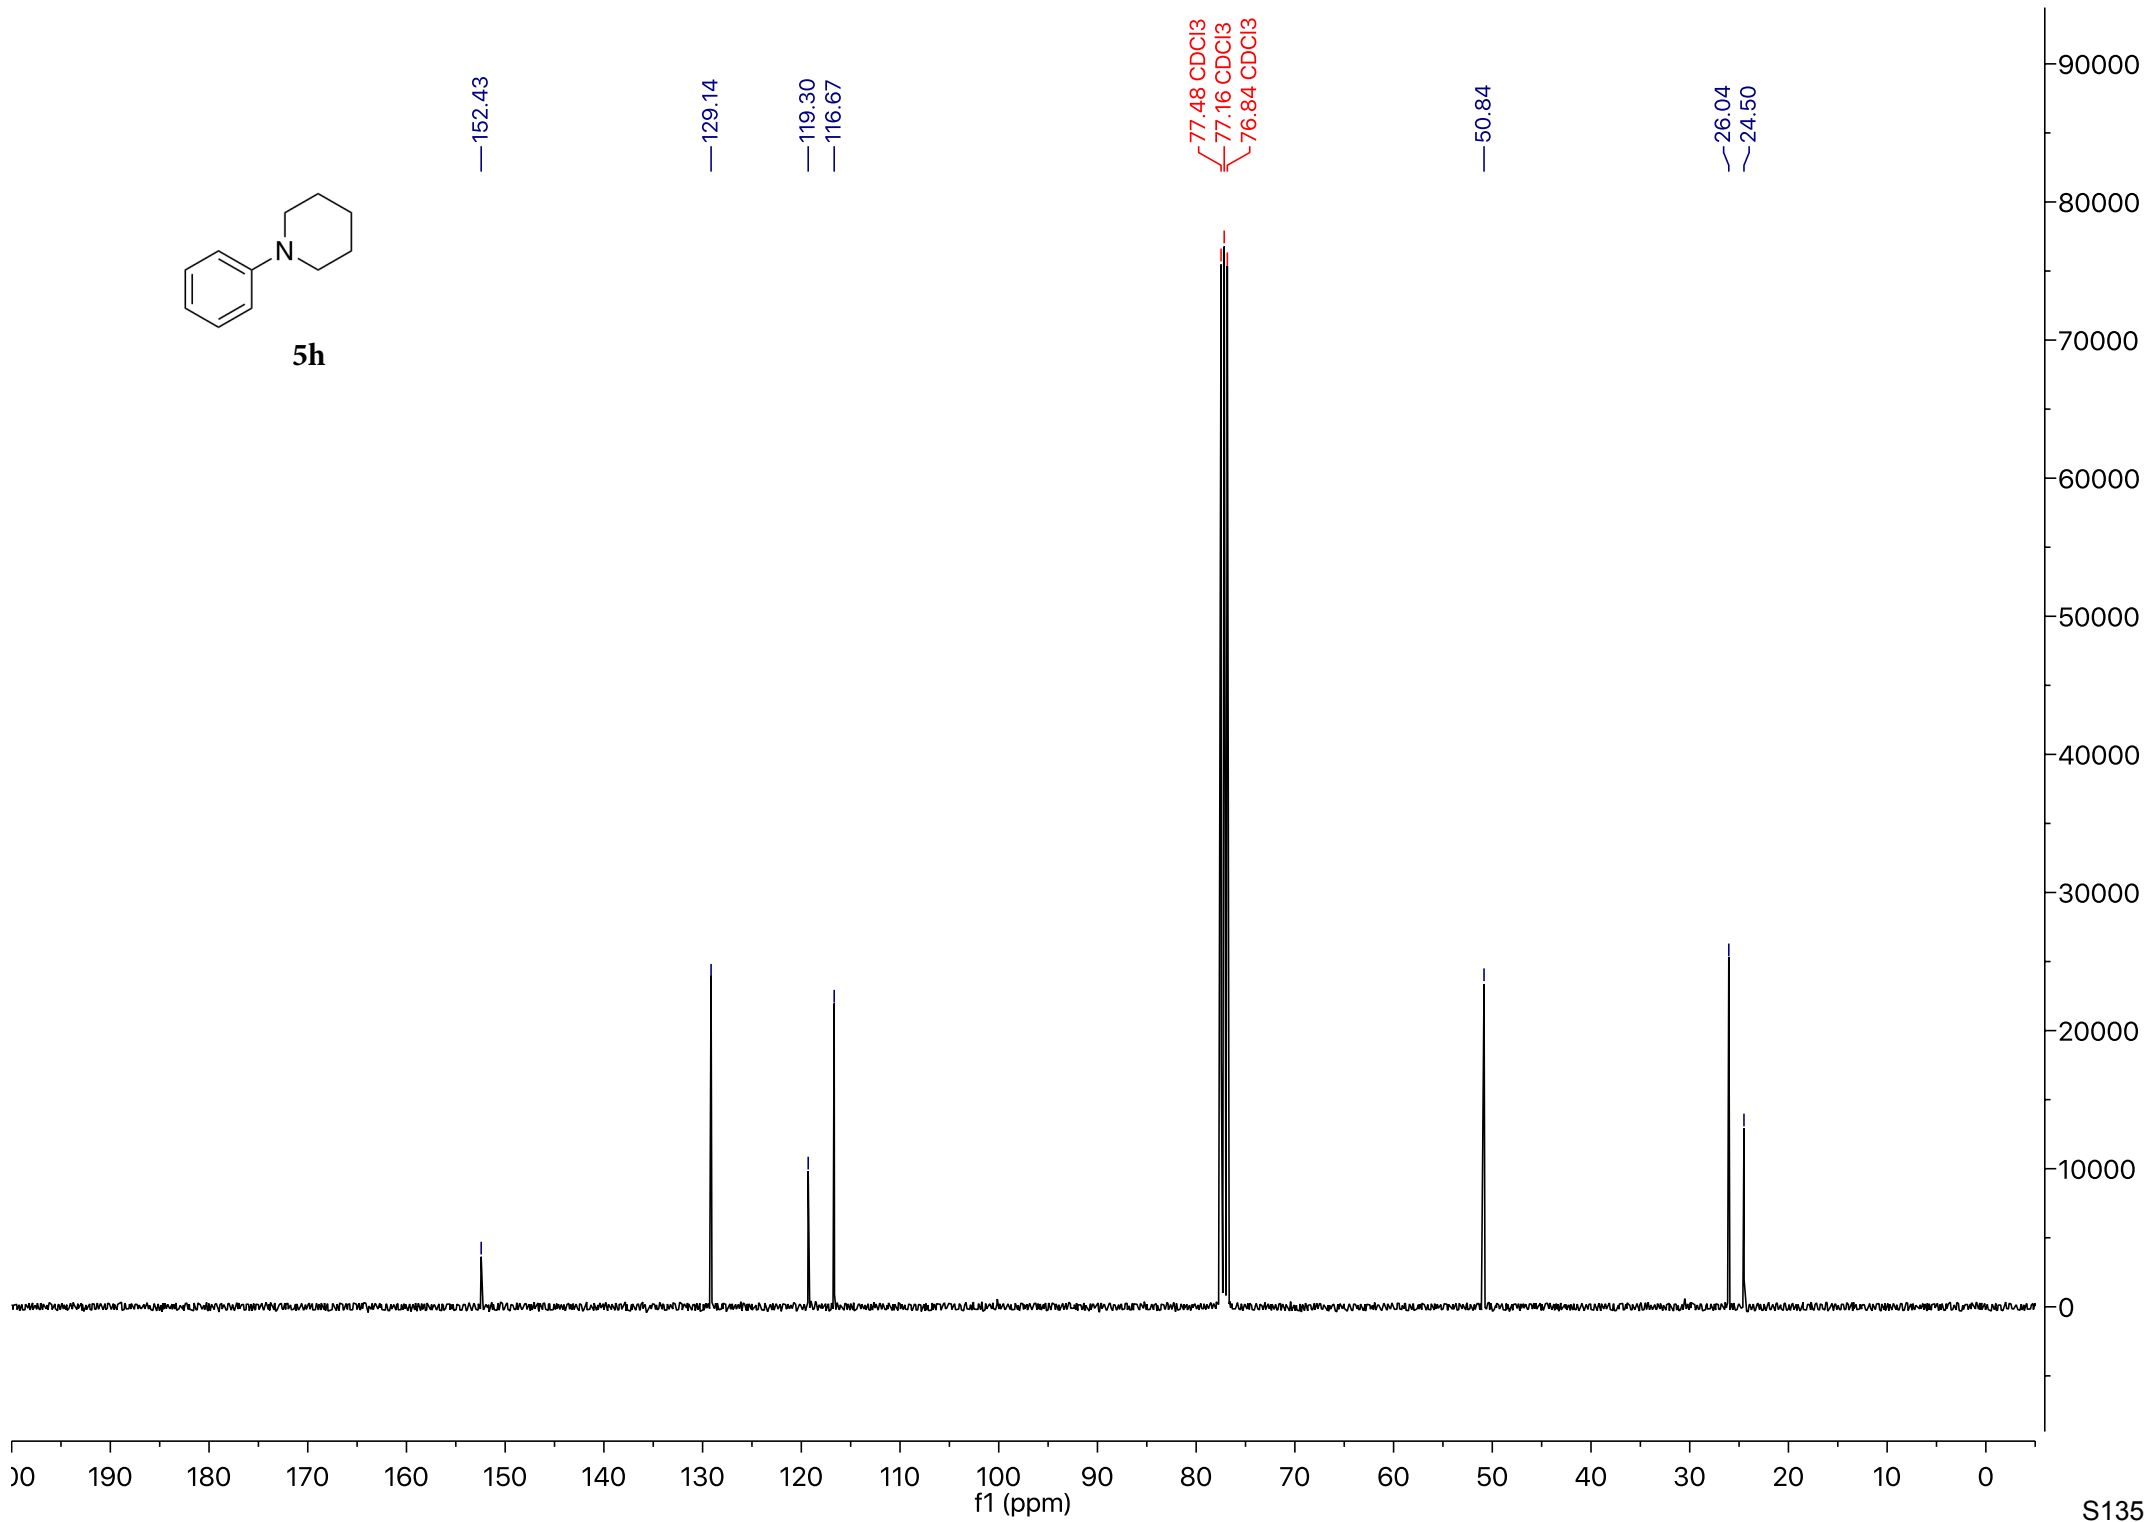

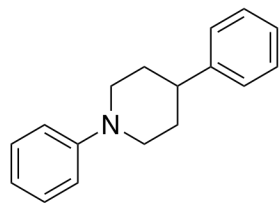

5i

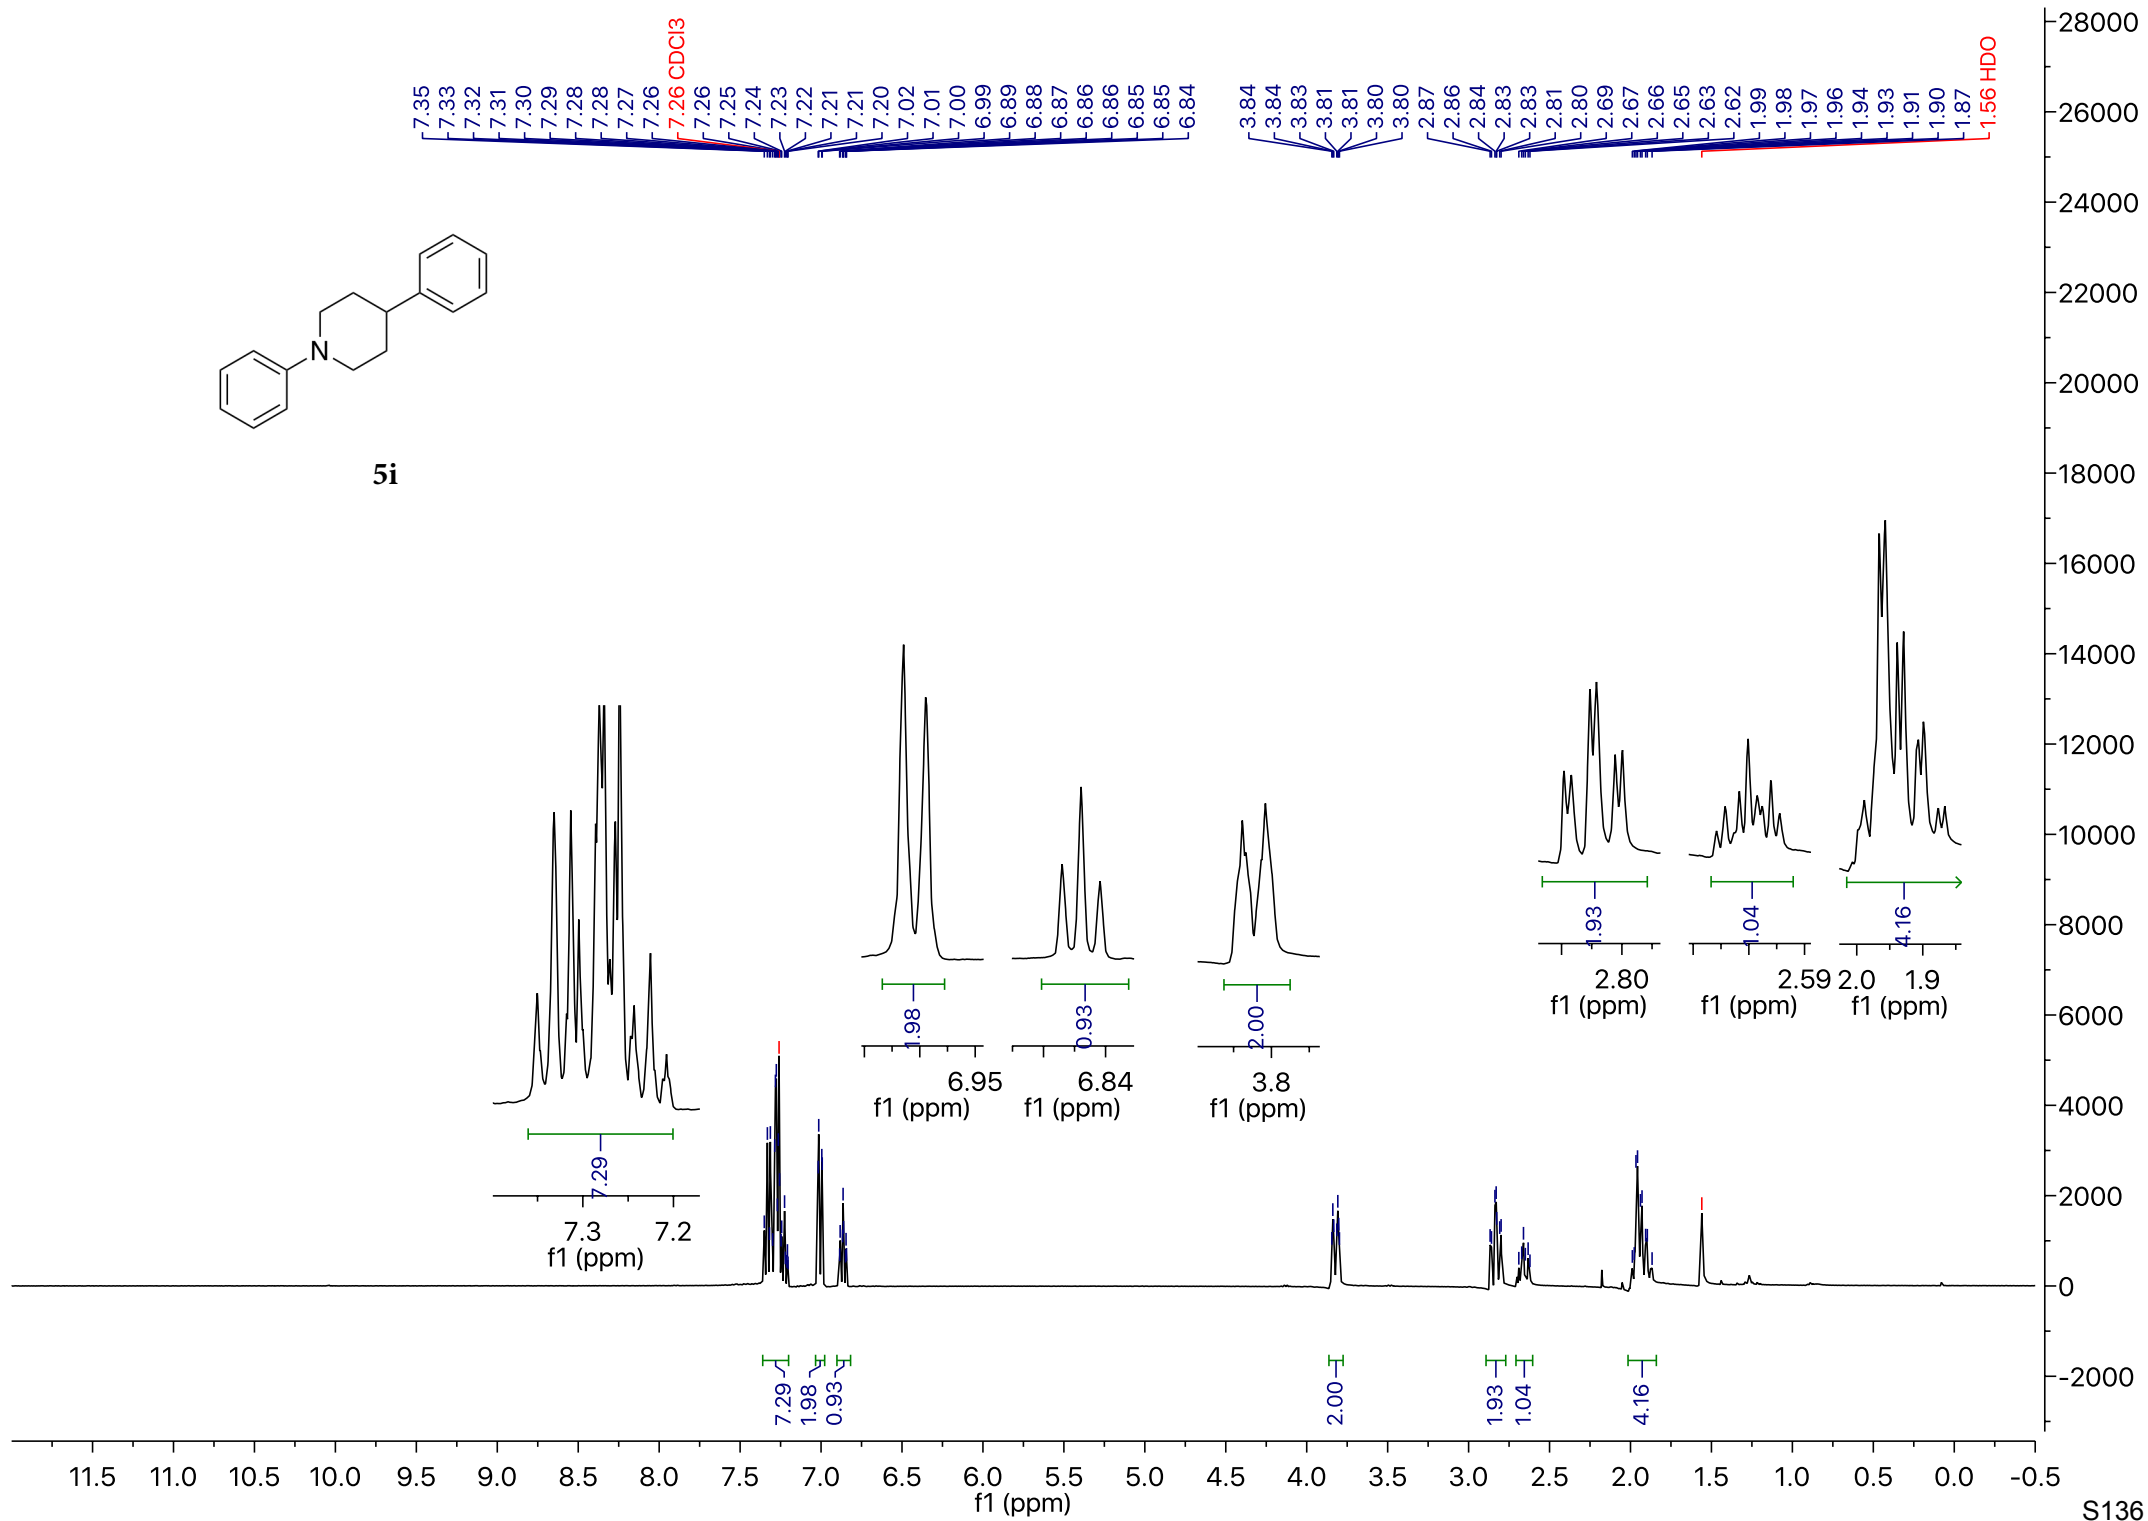

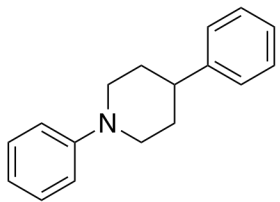

5i

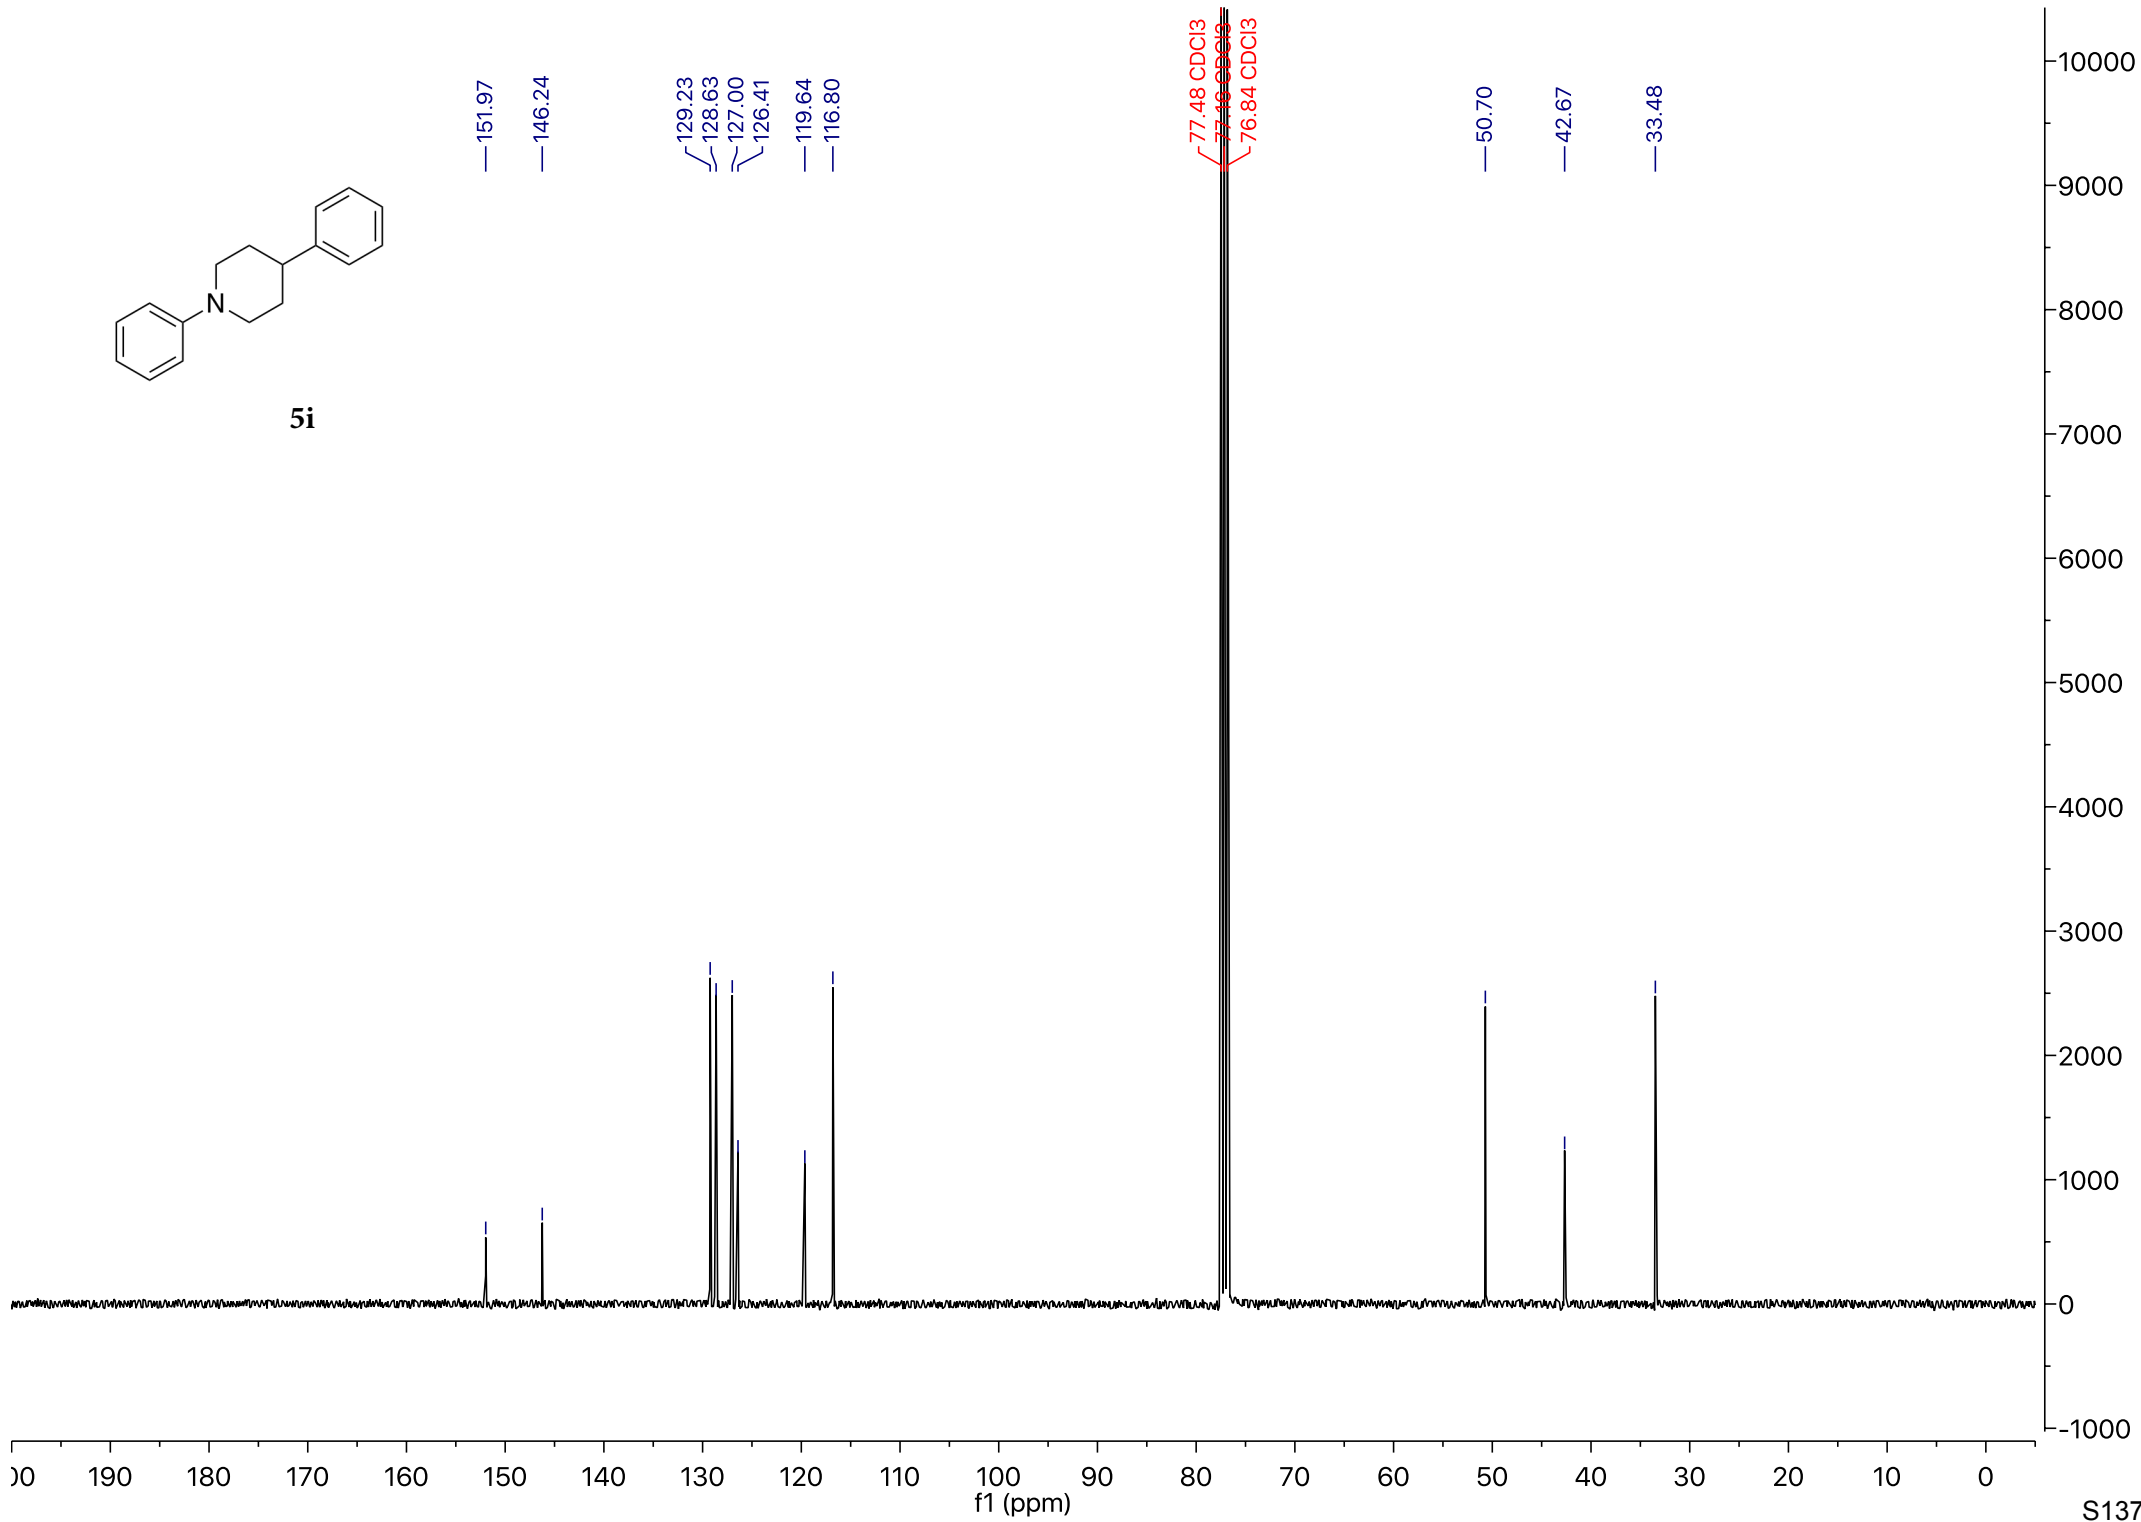

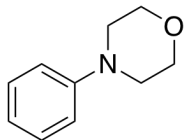

5j

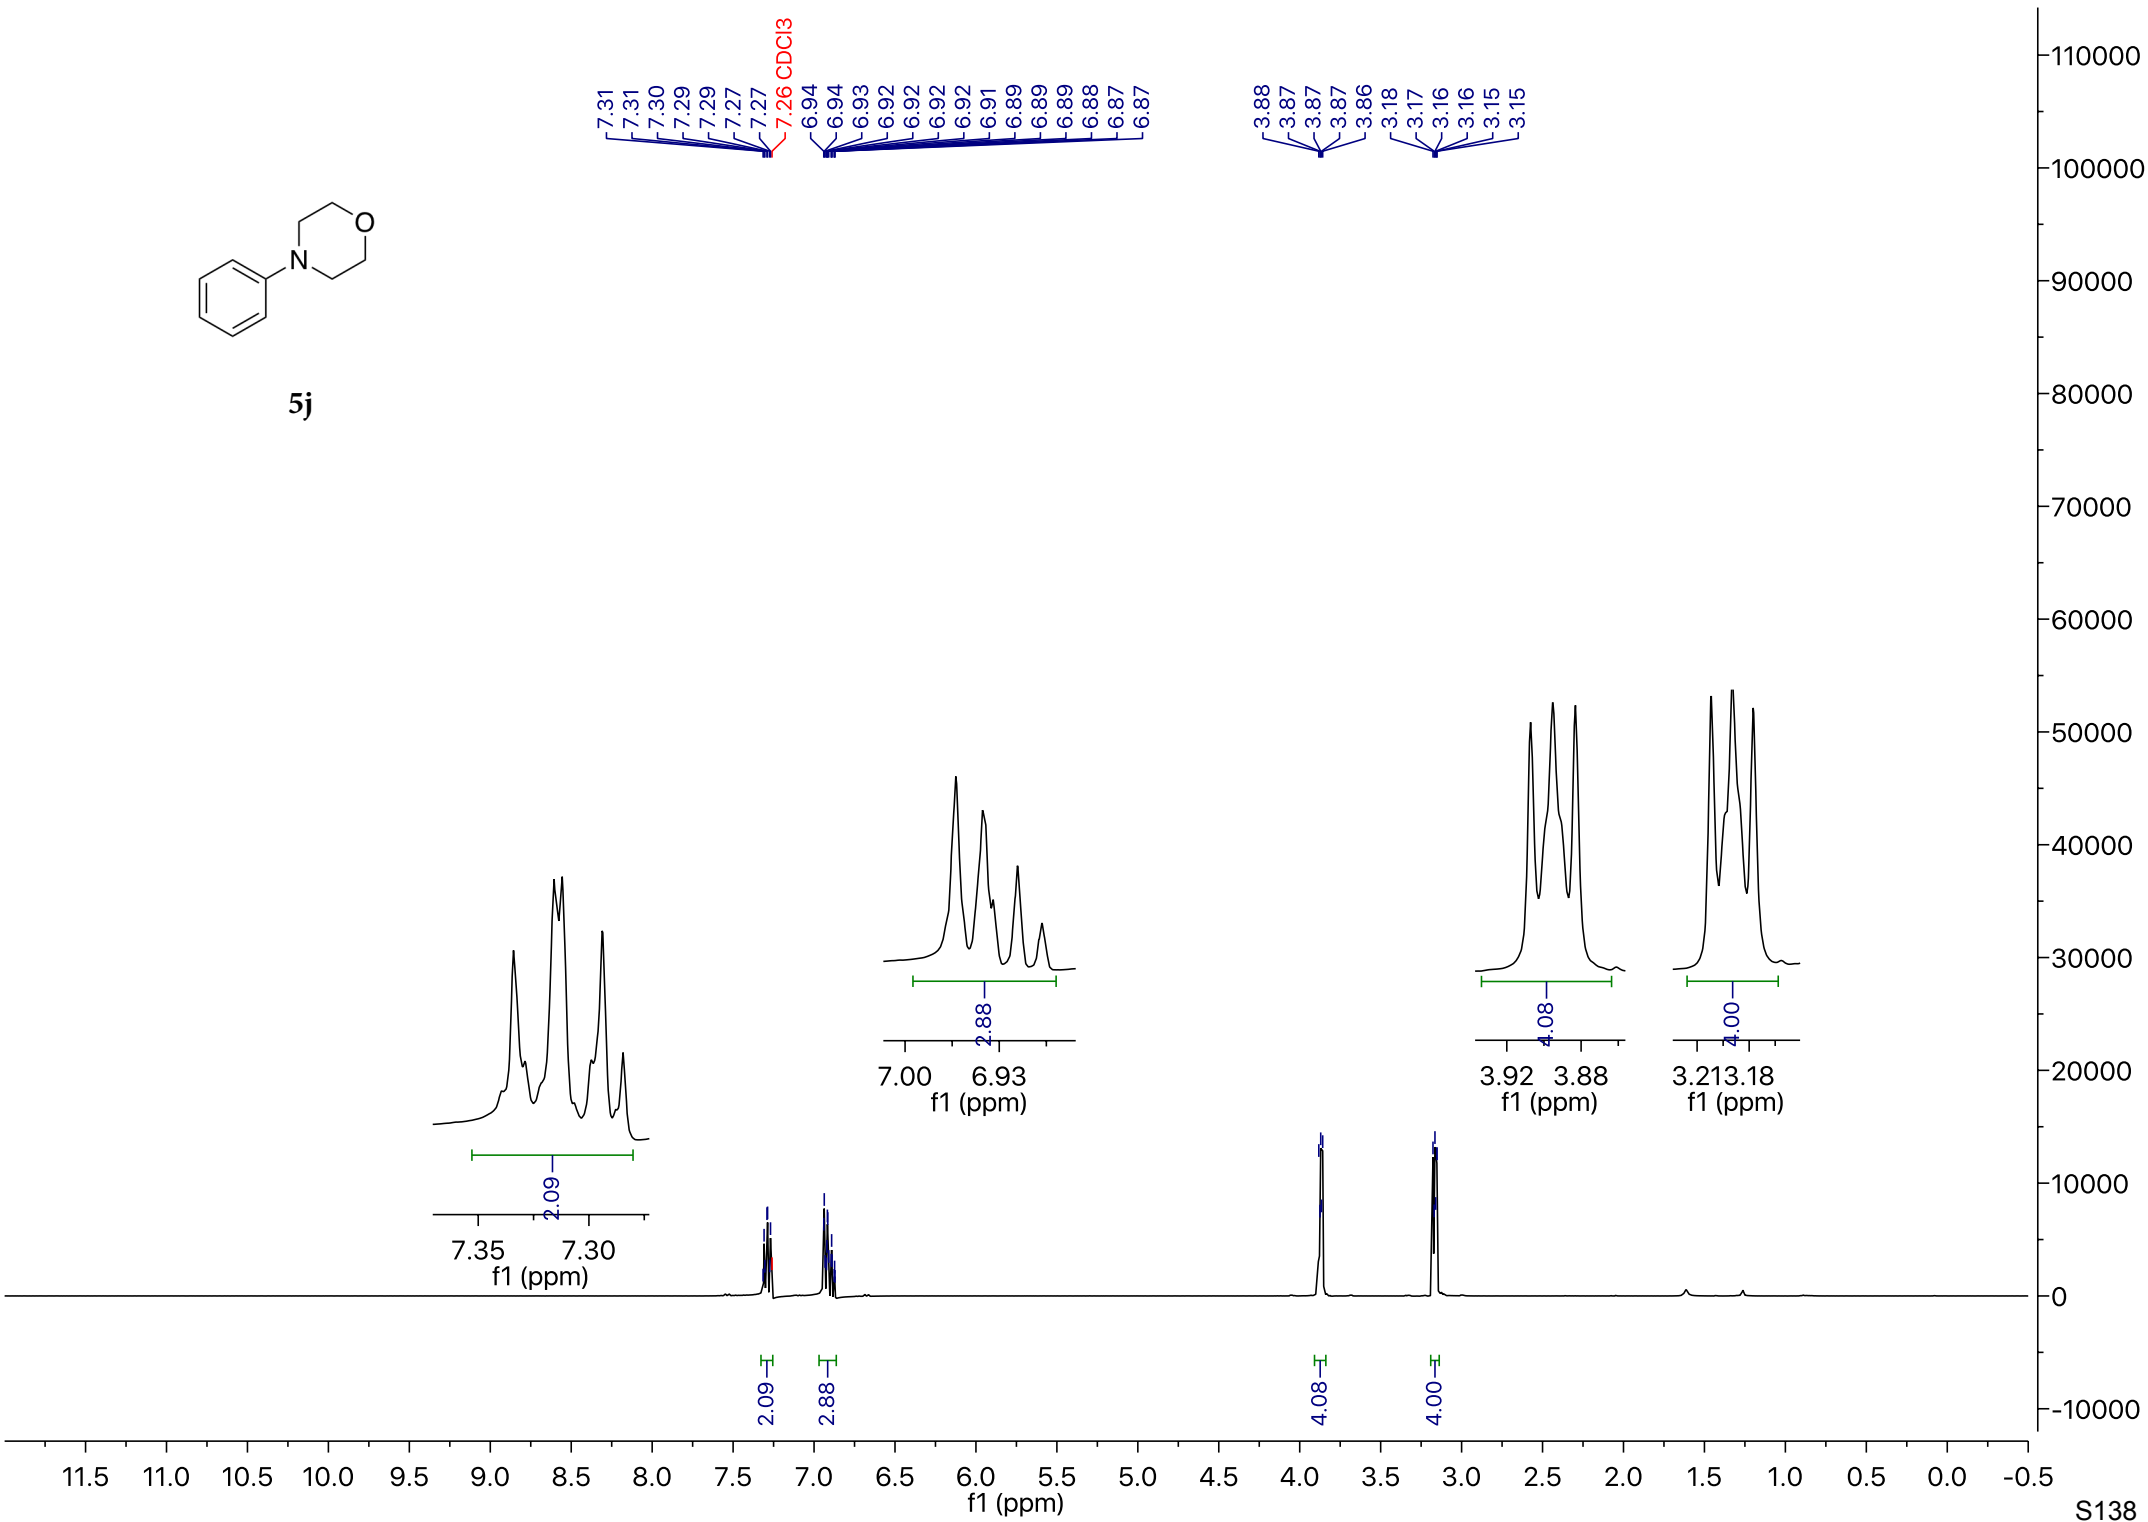

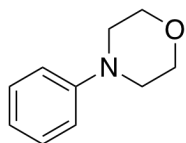

5j

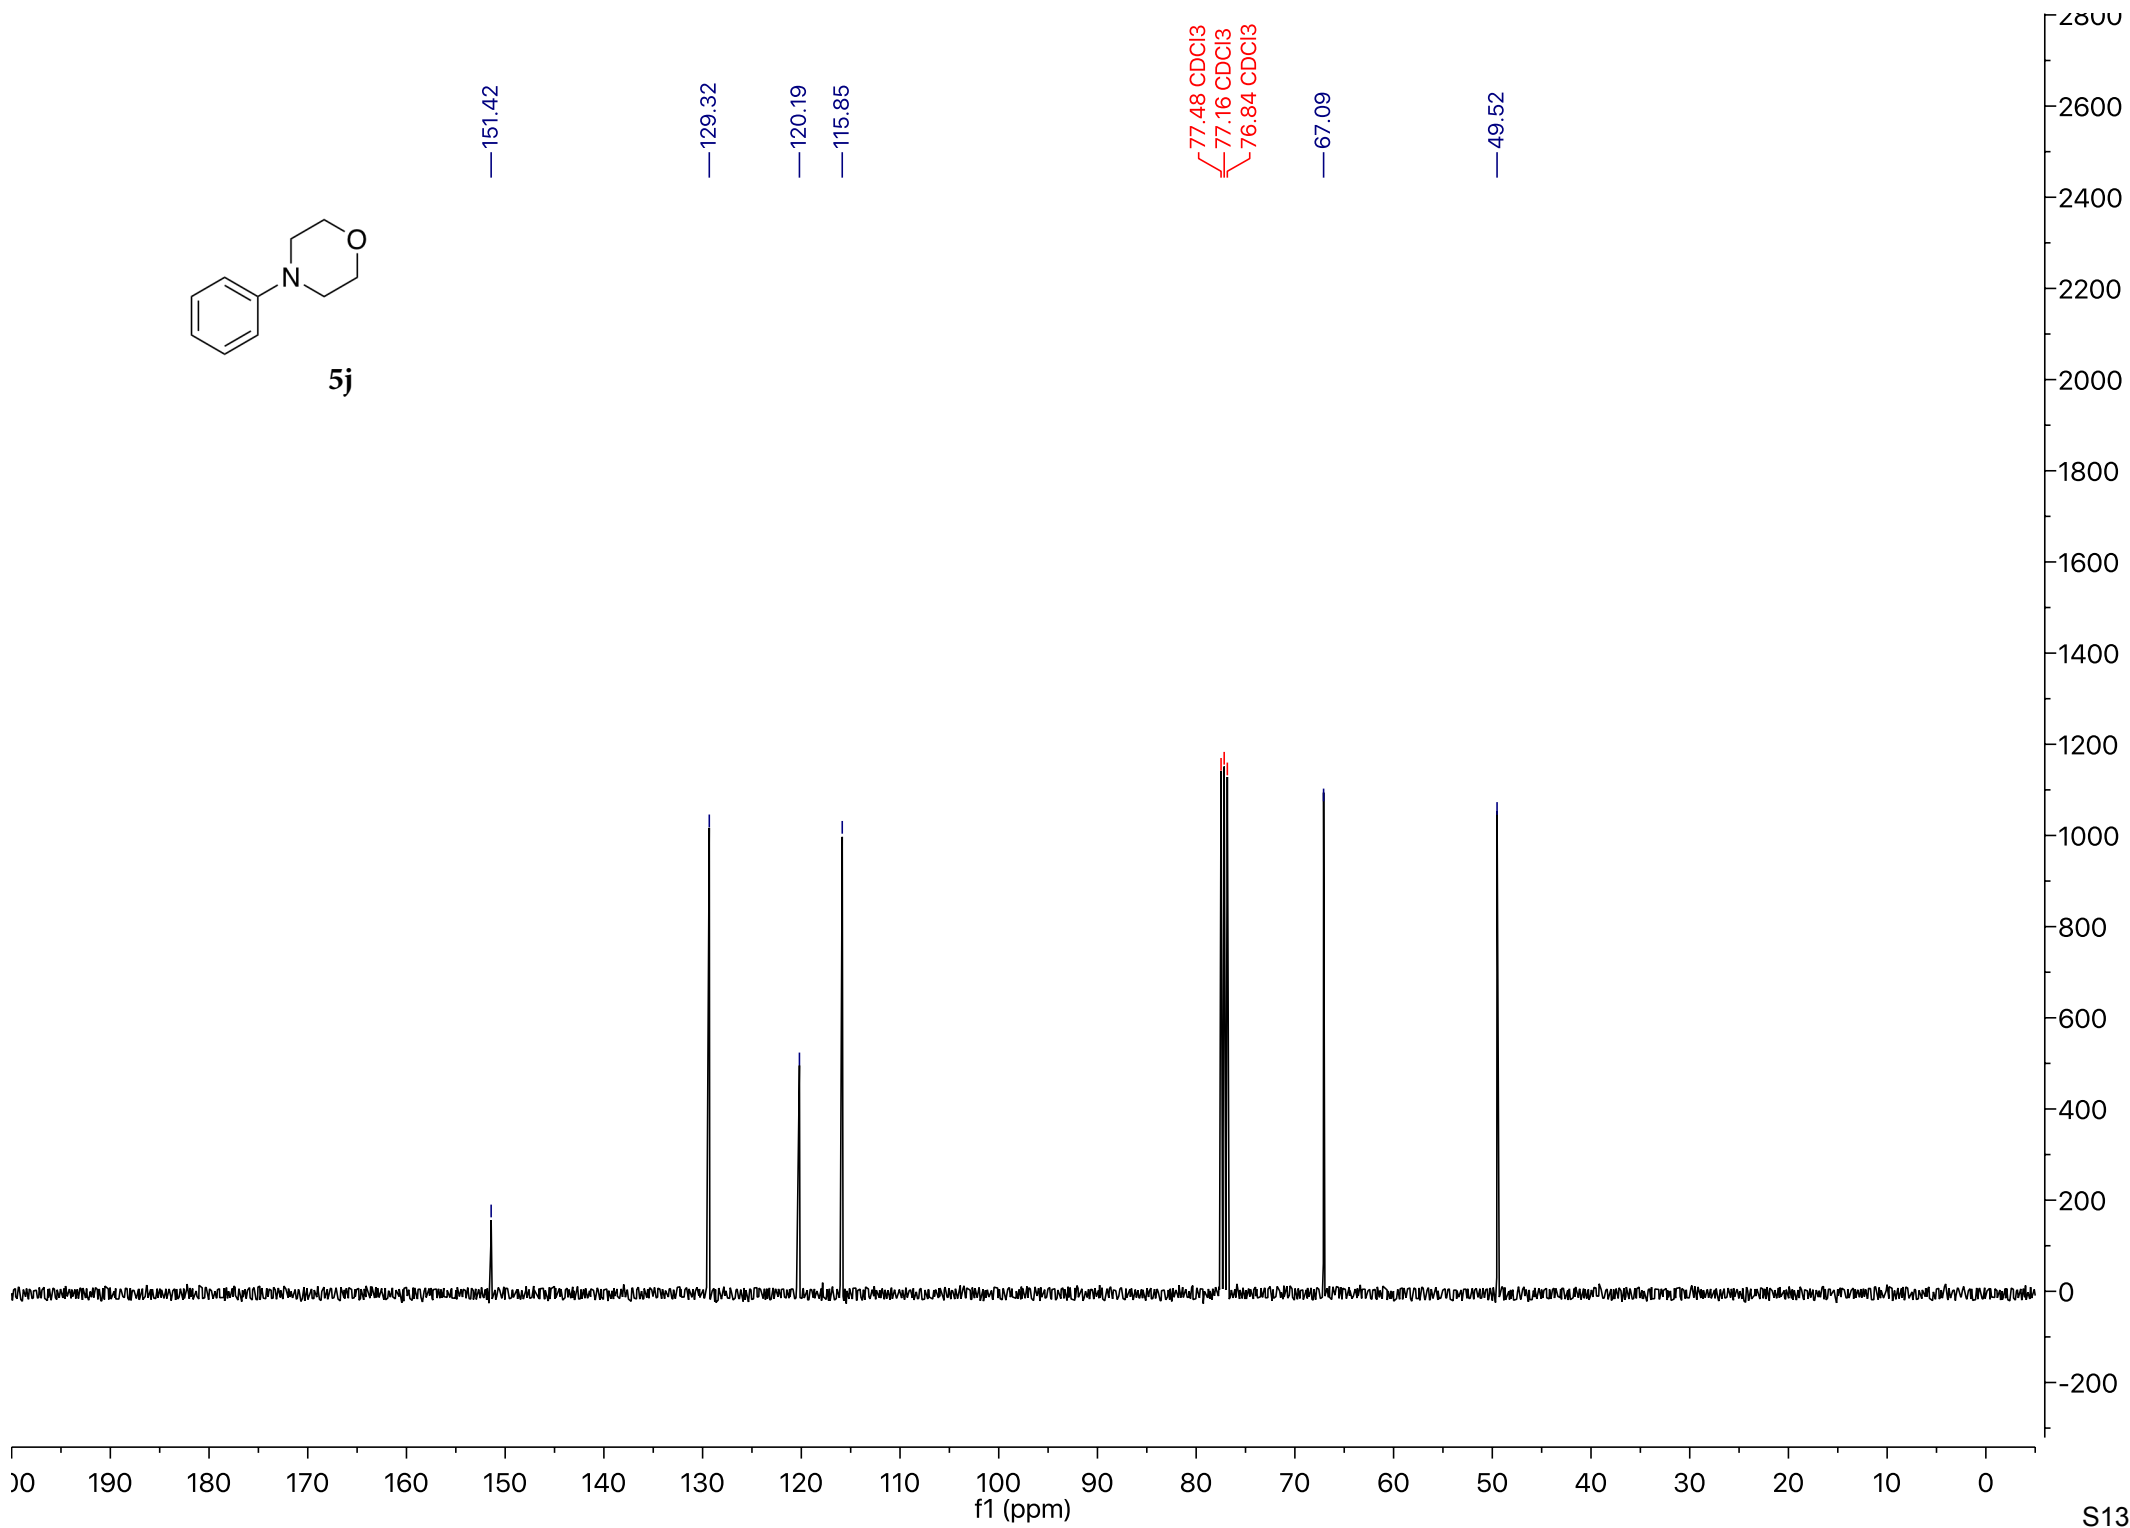



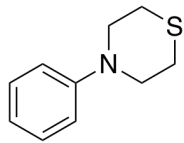

5k

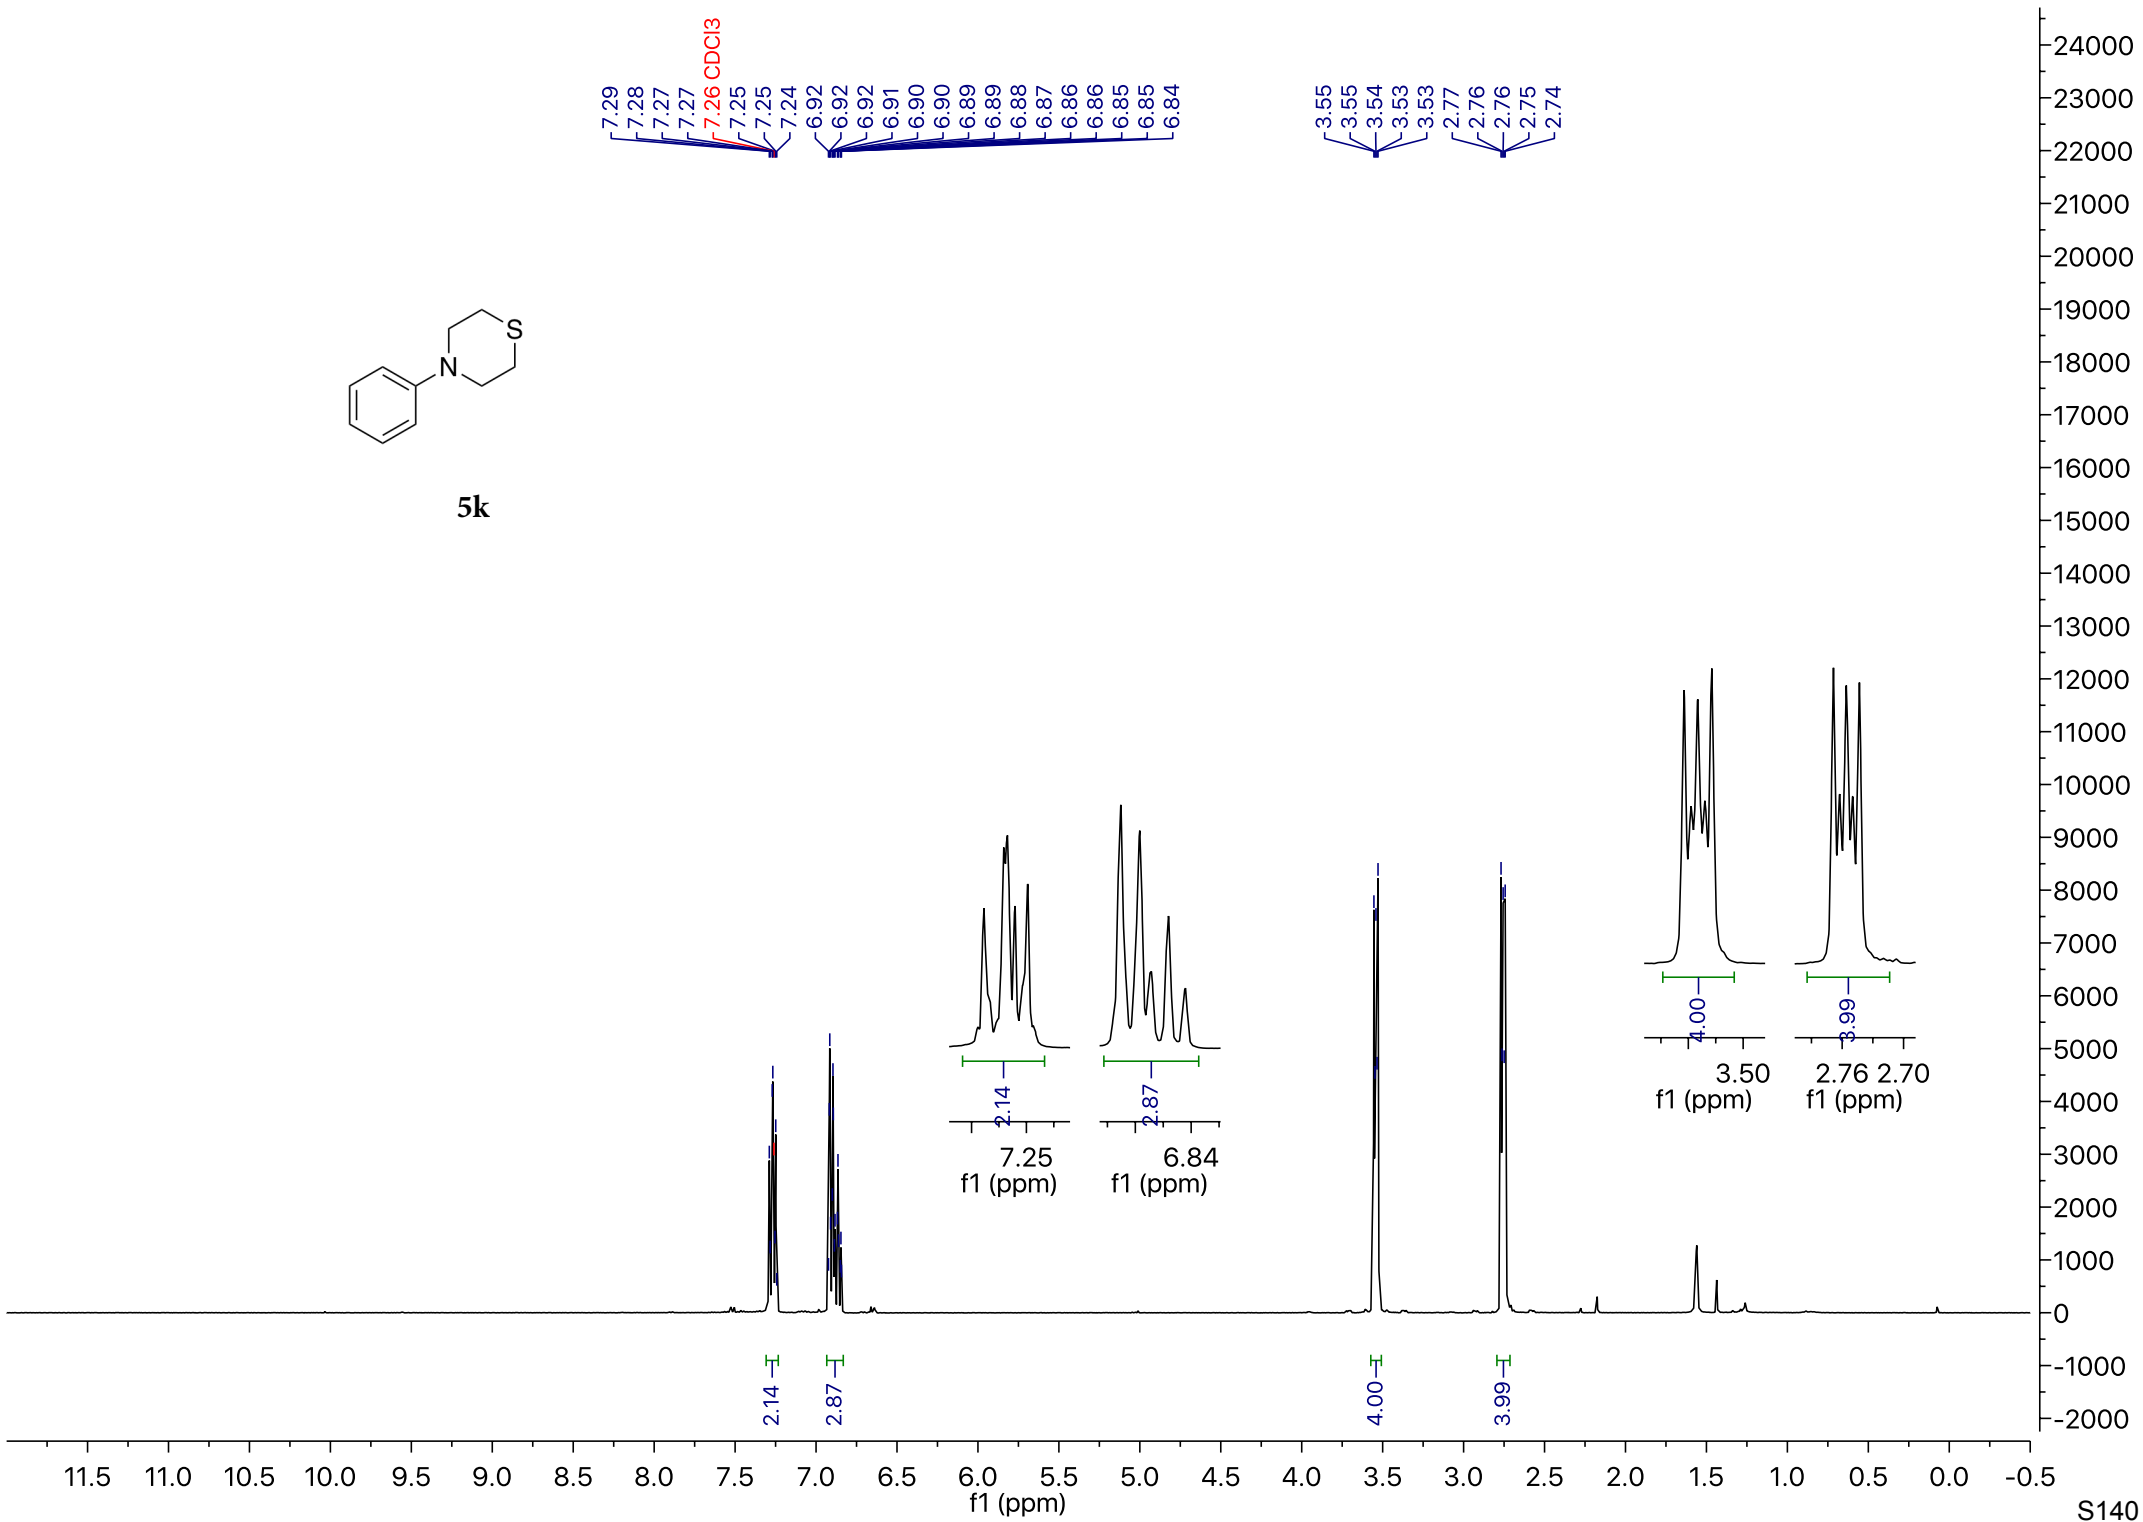

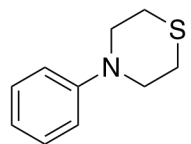

5k

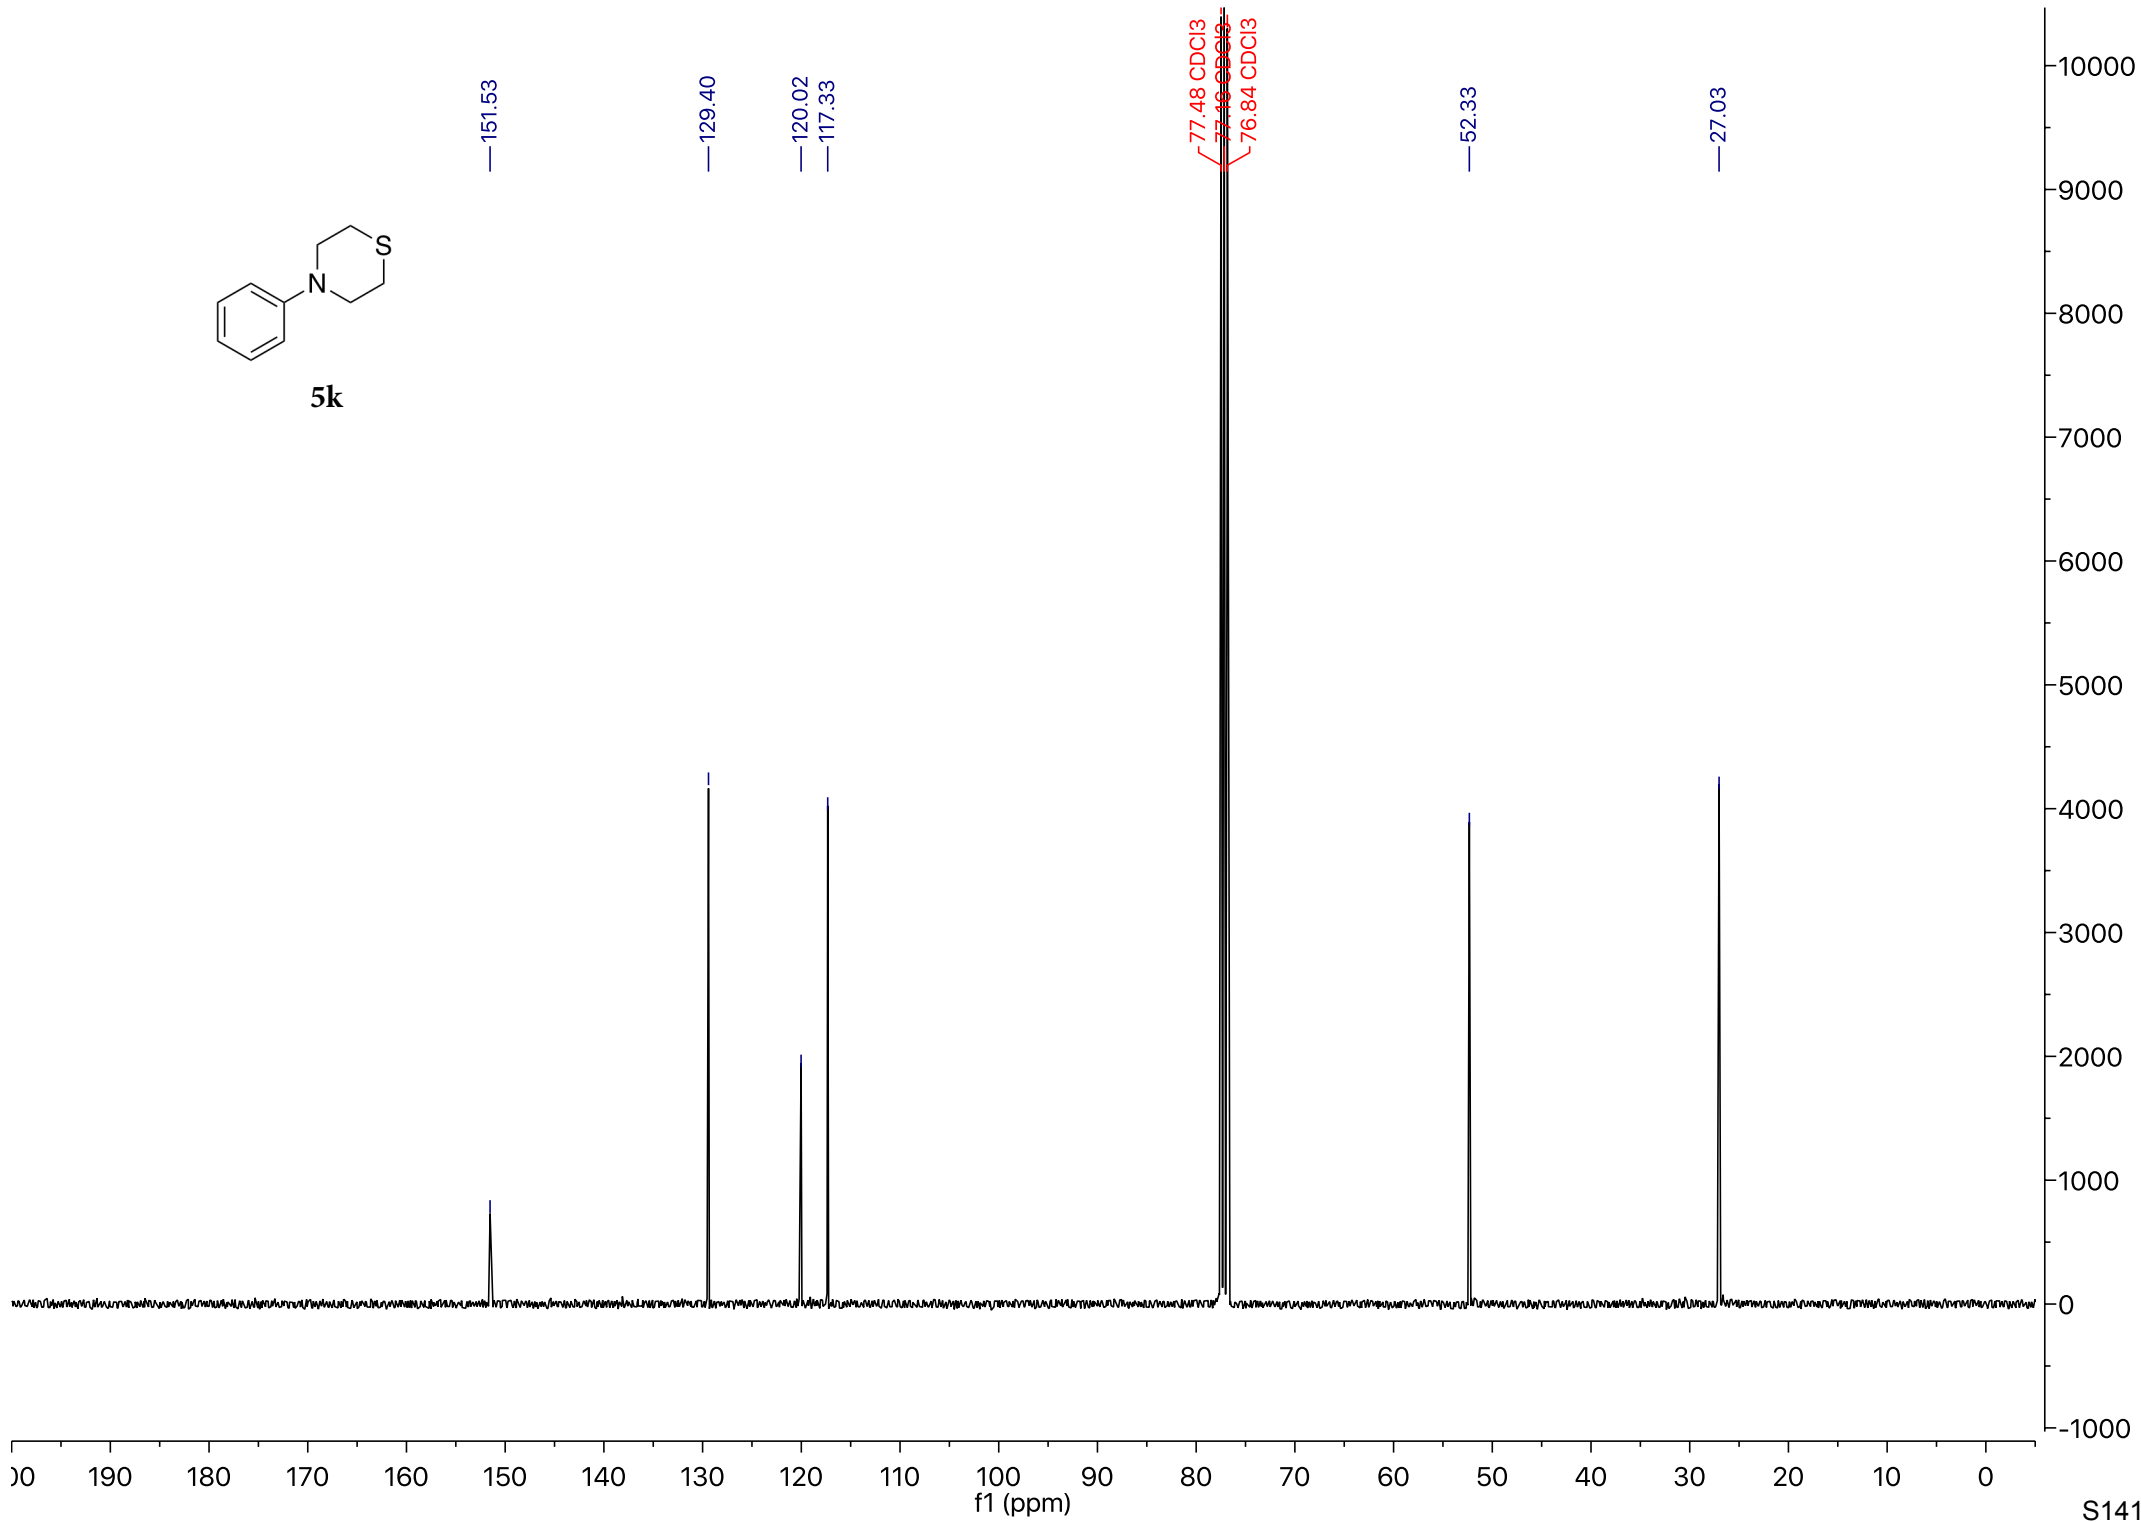

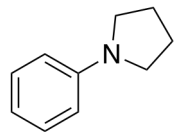

51

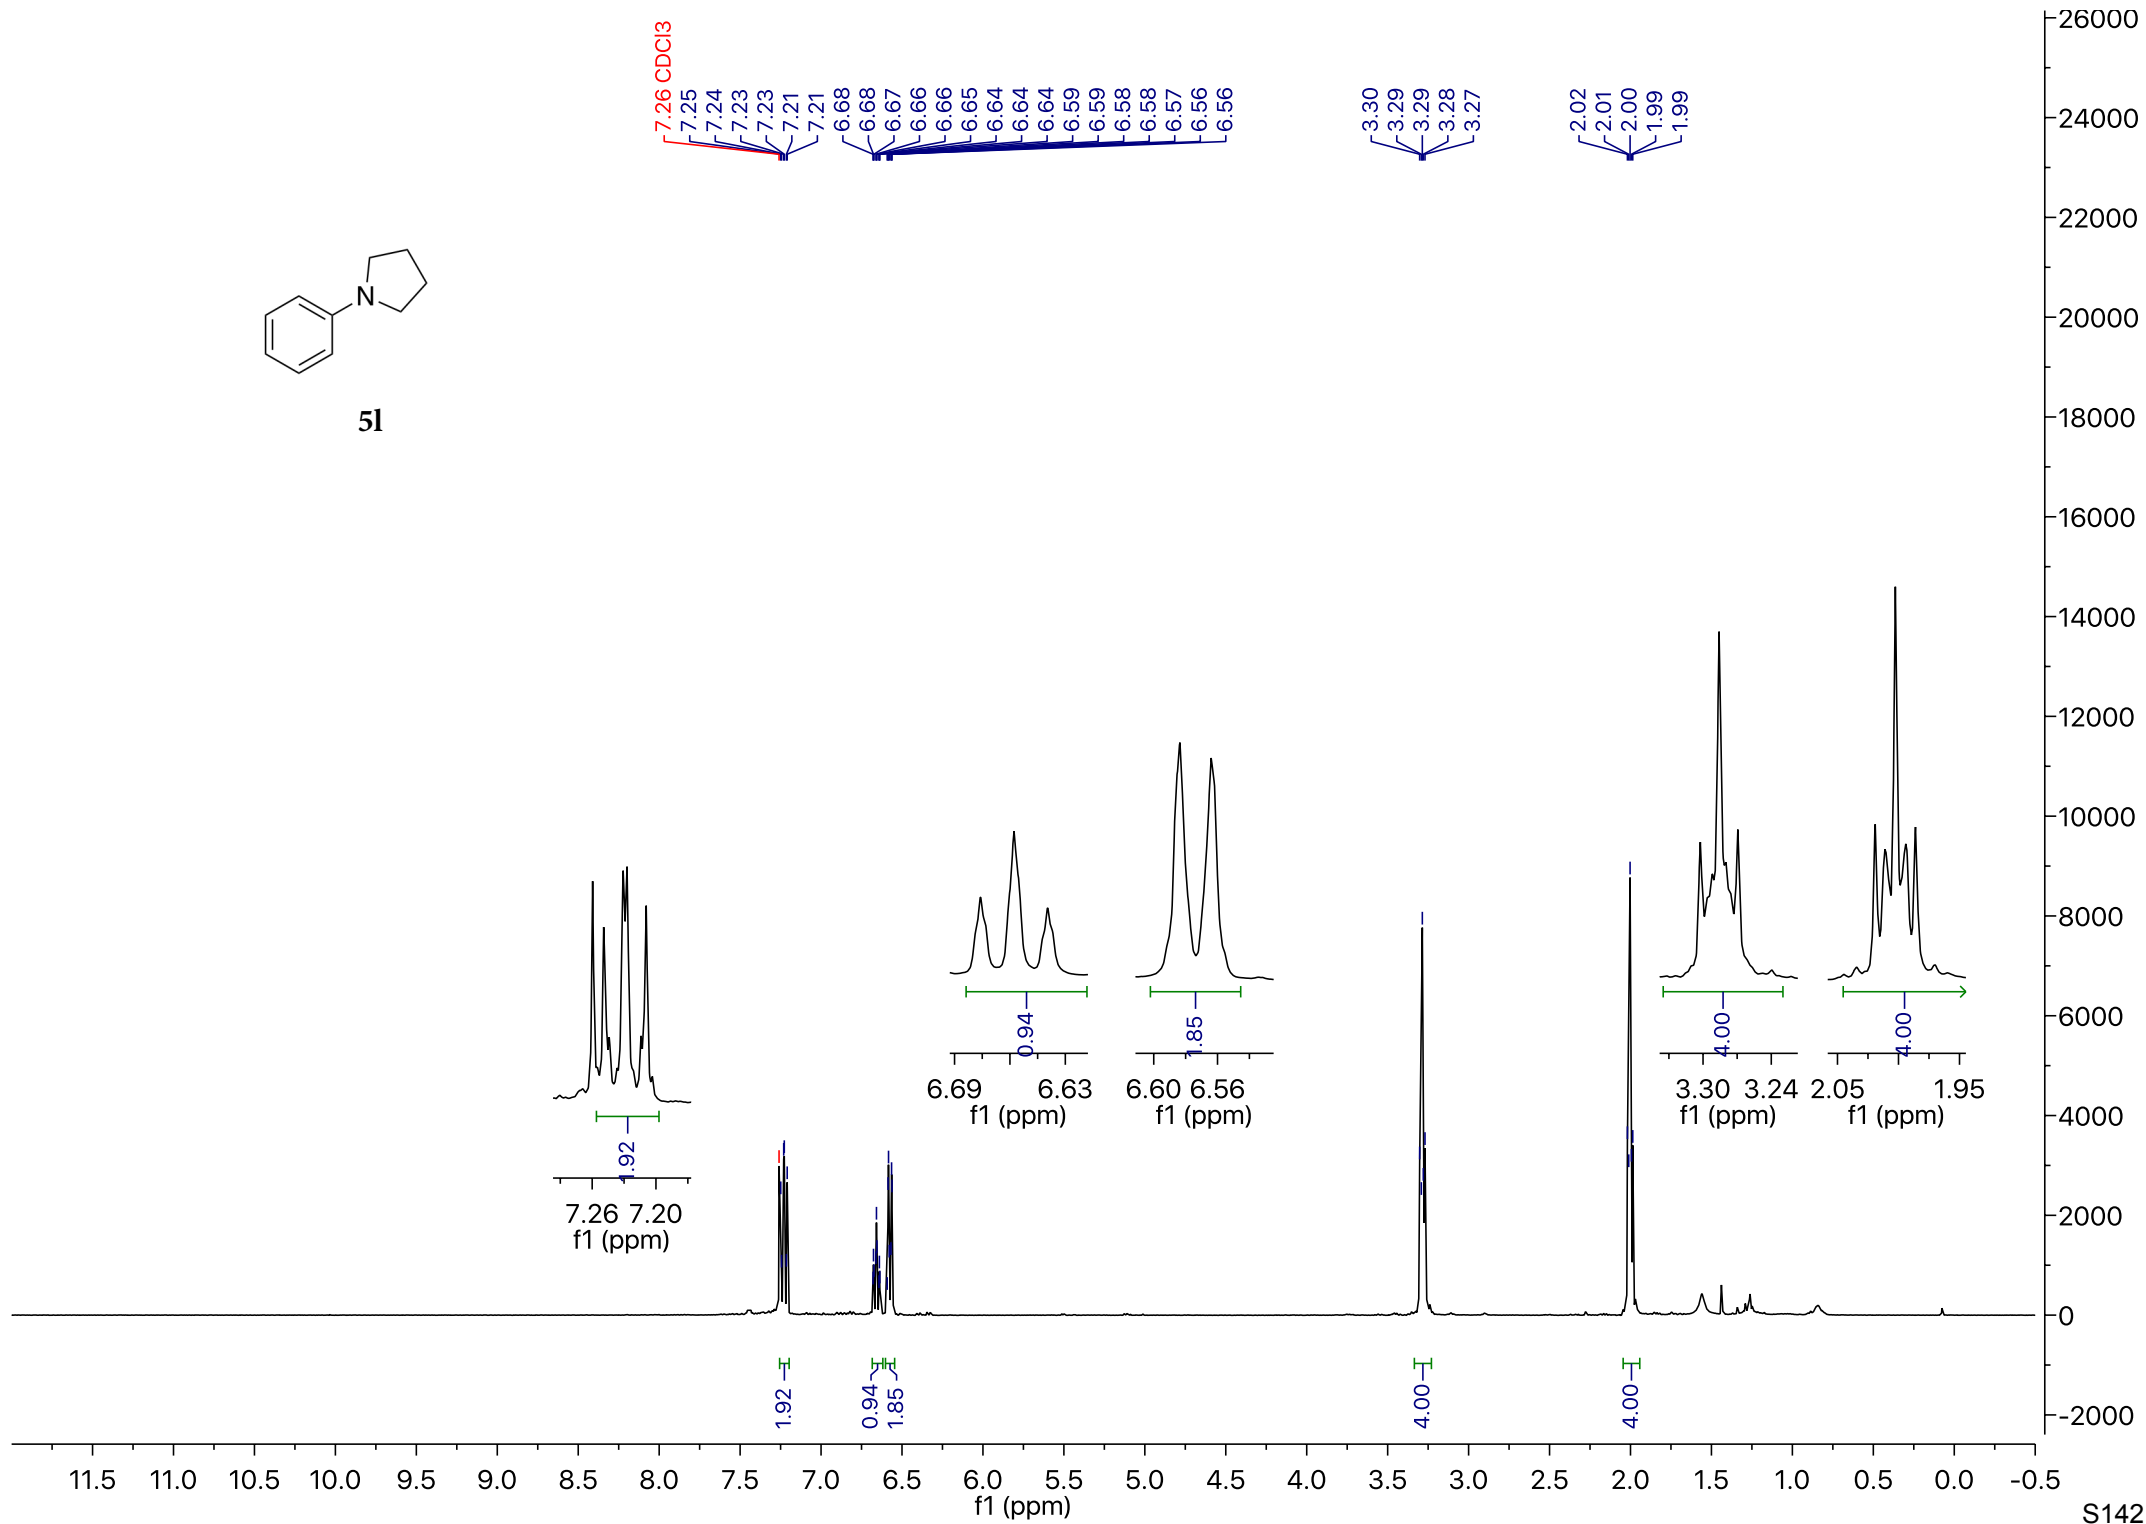

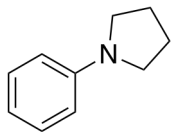

51

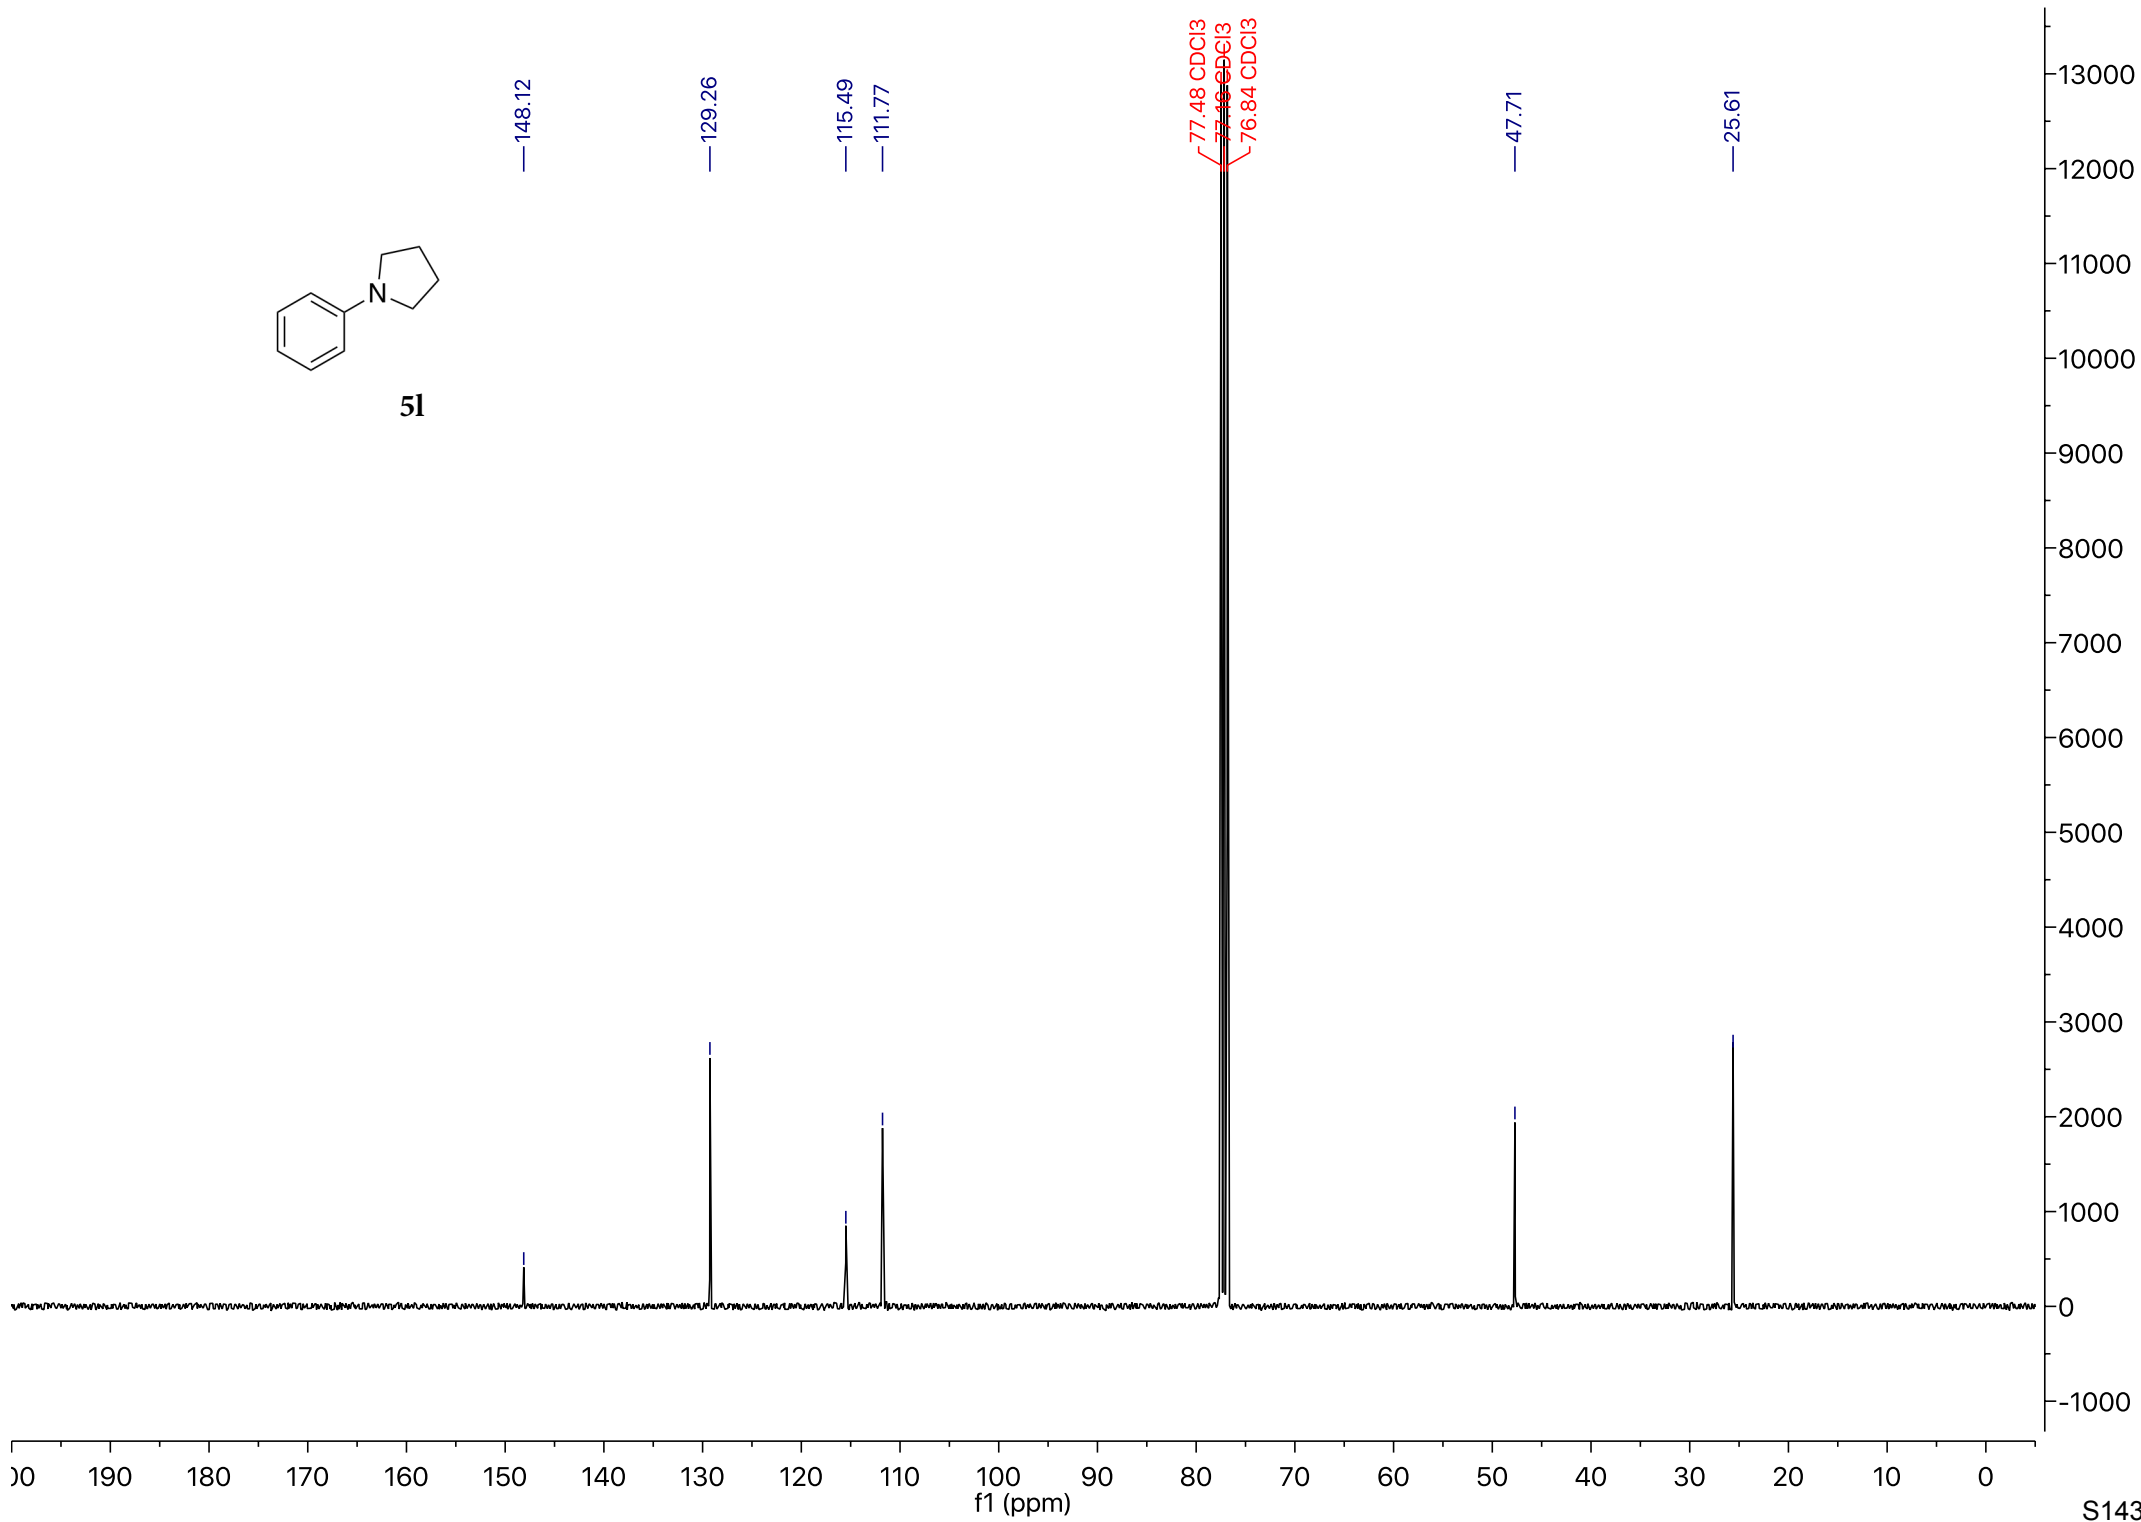

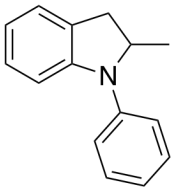

5m

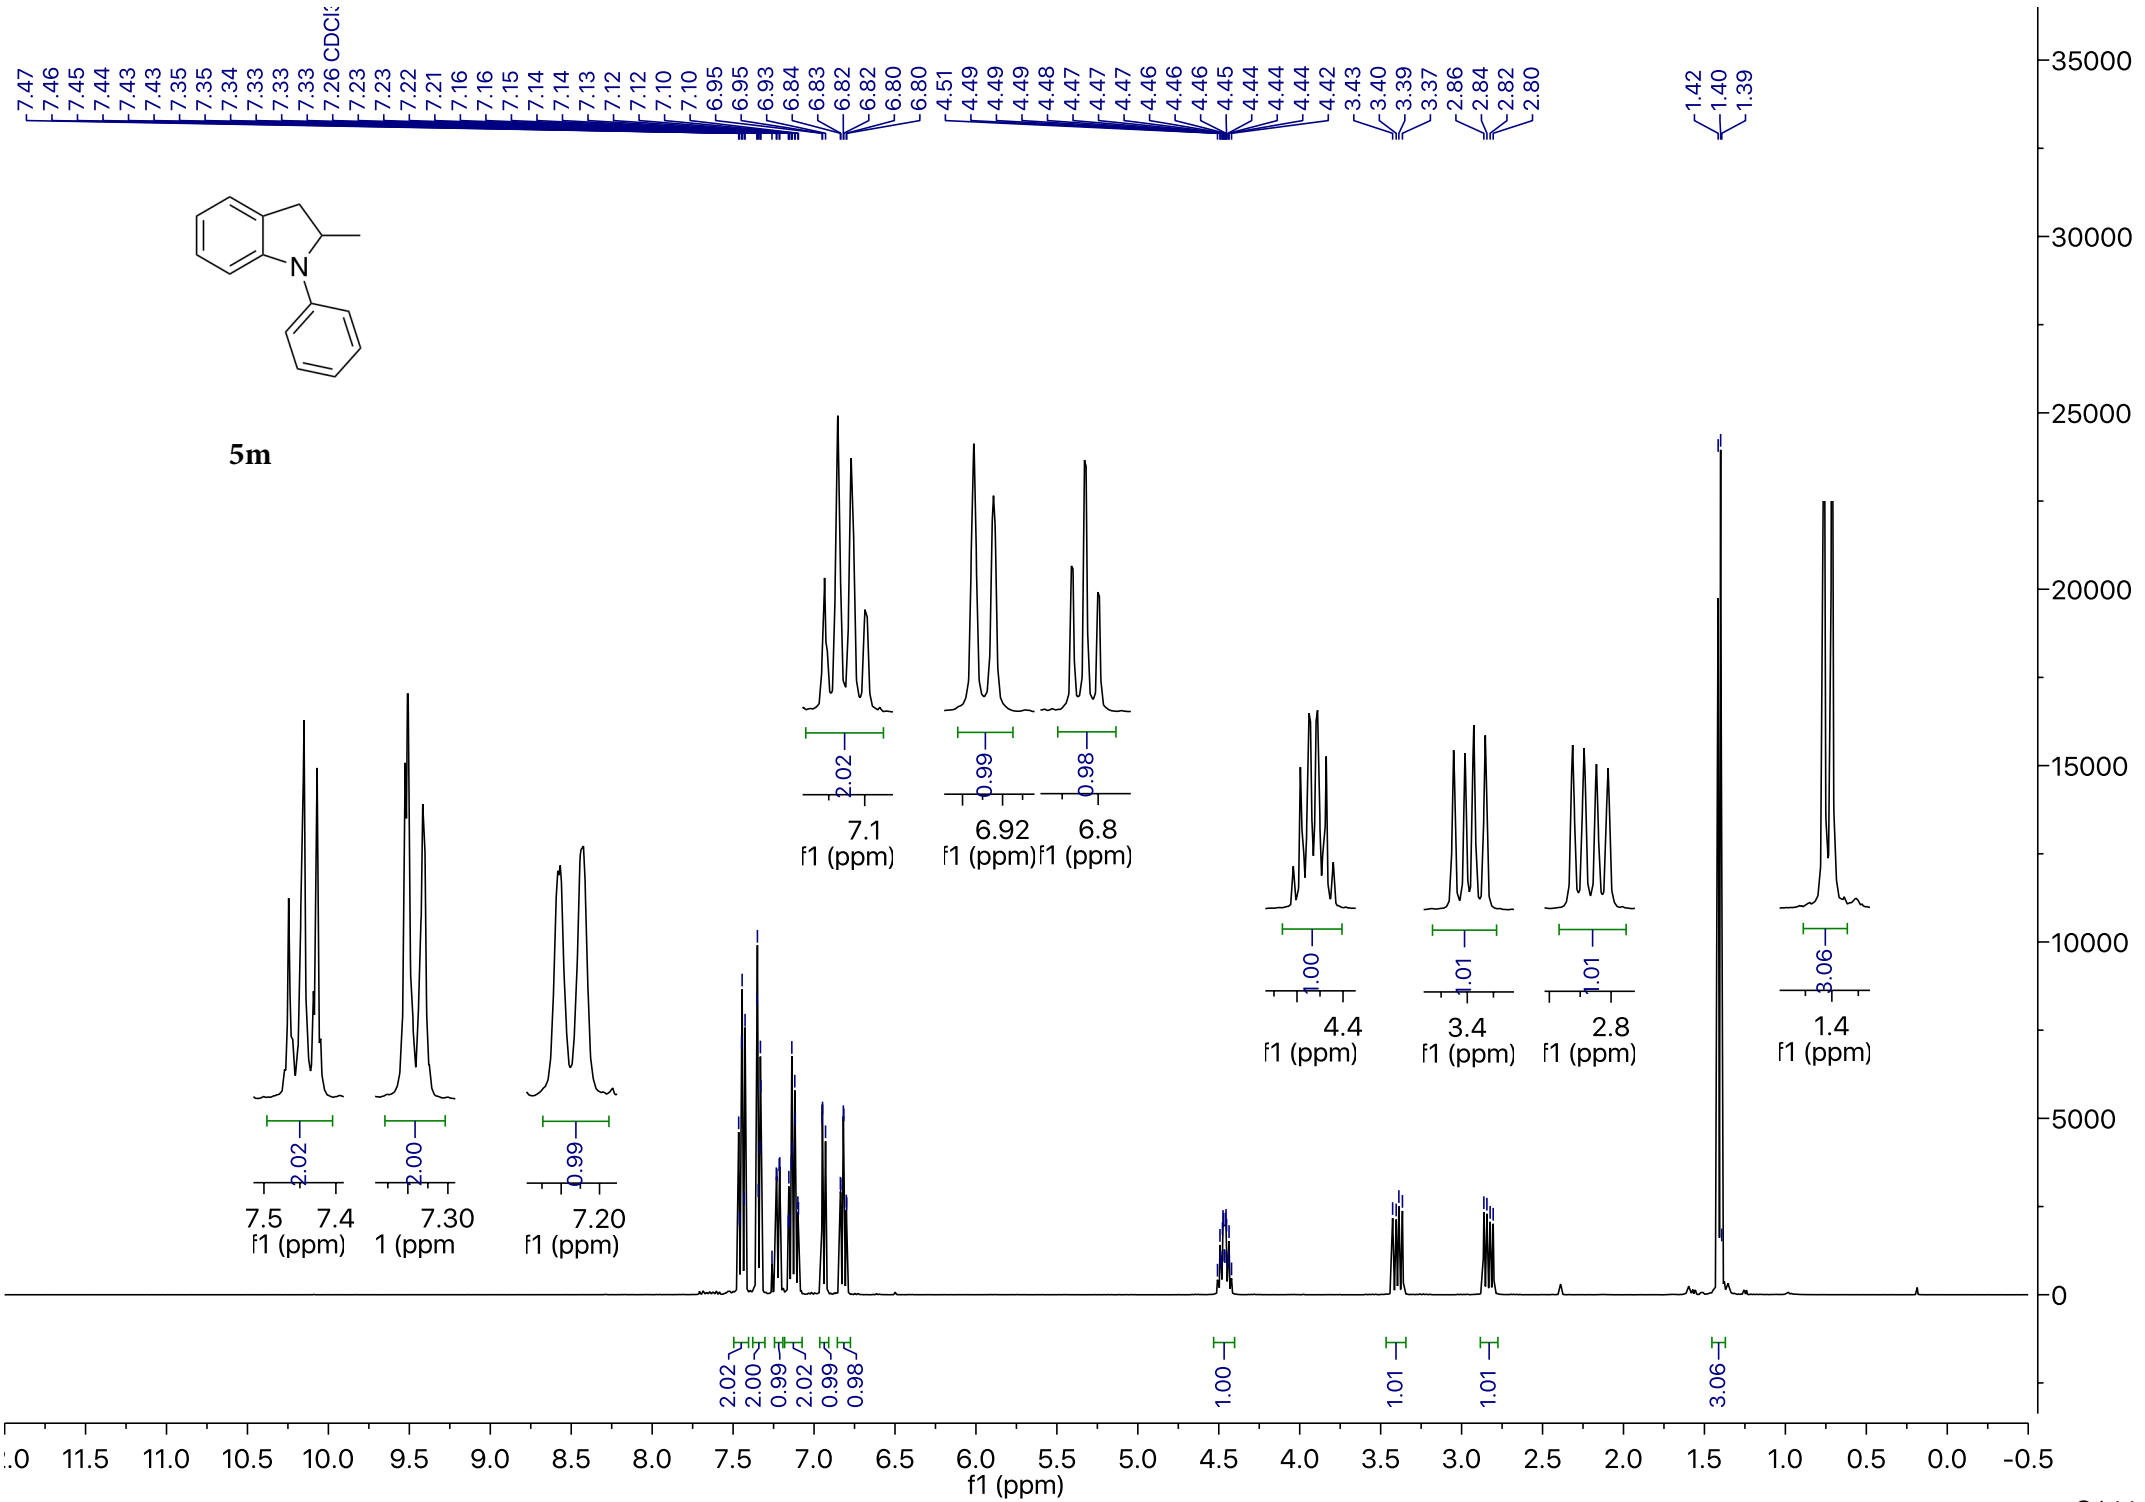

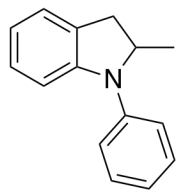

5m

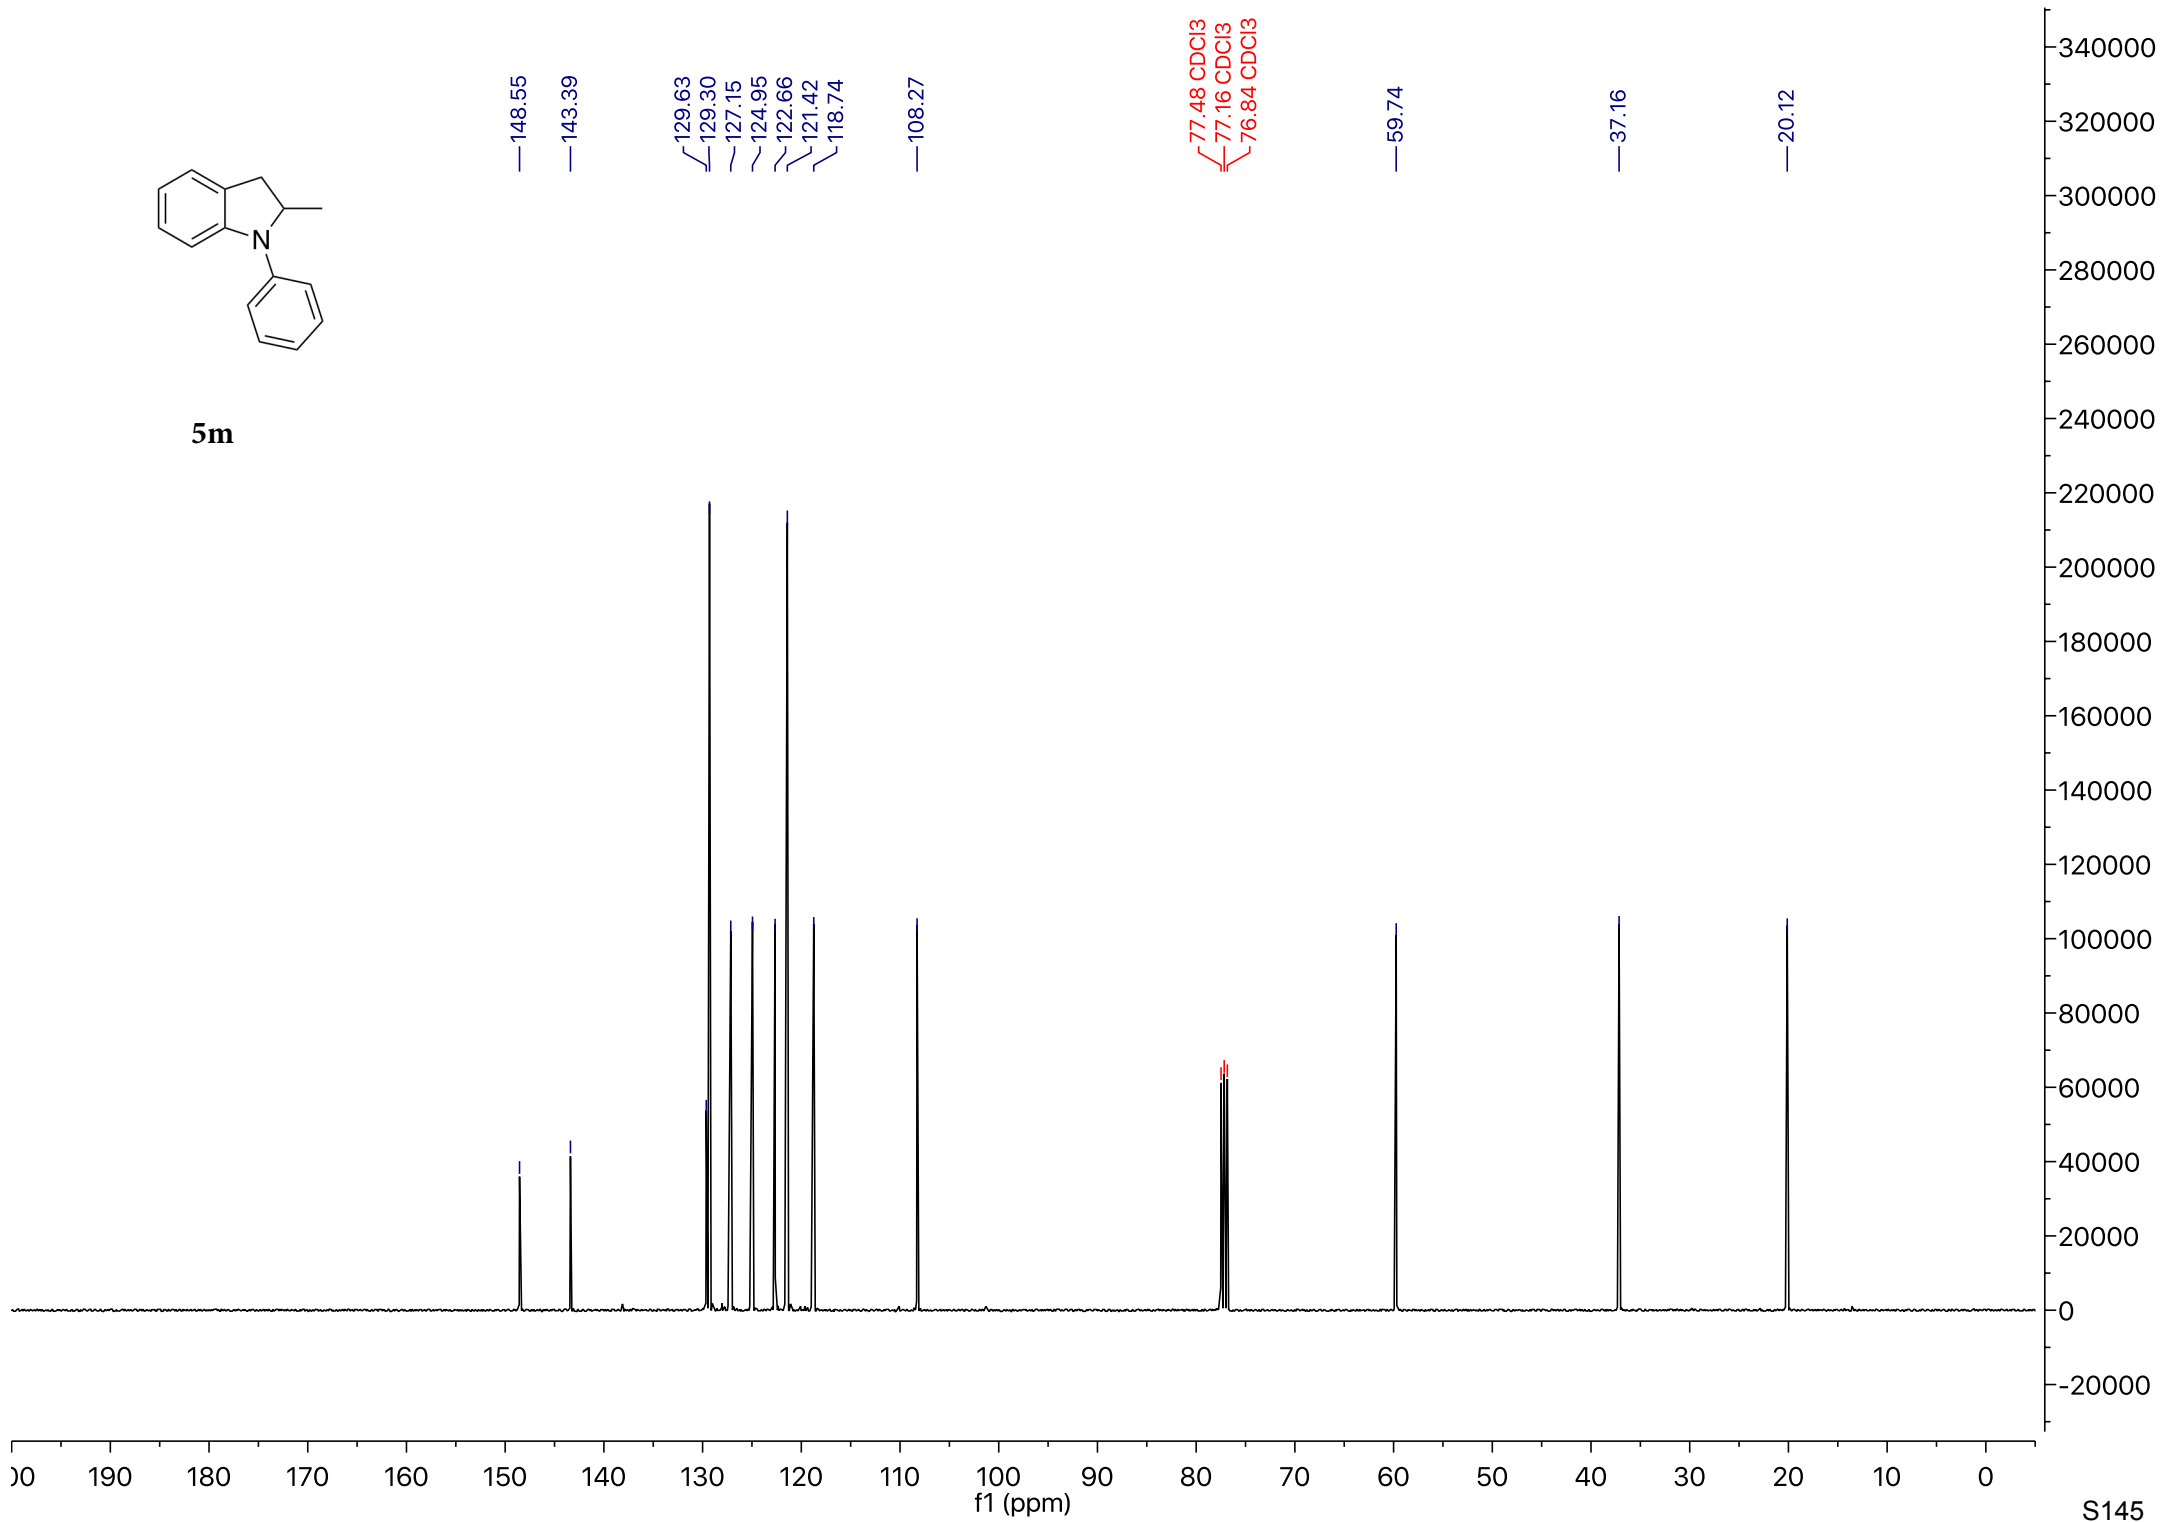

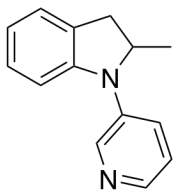

5n

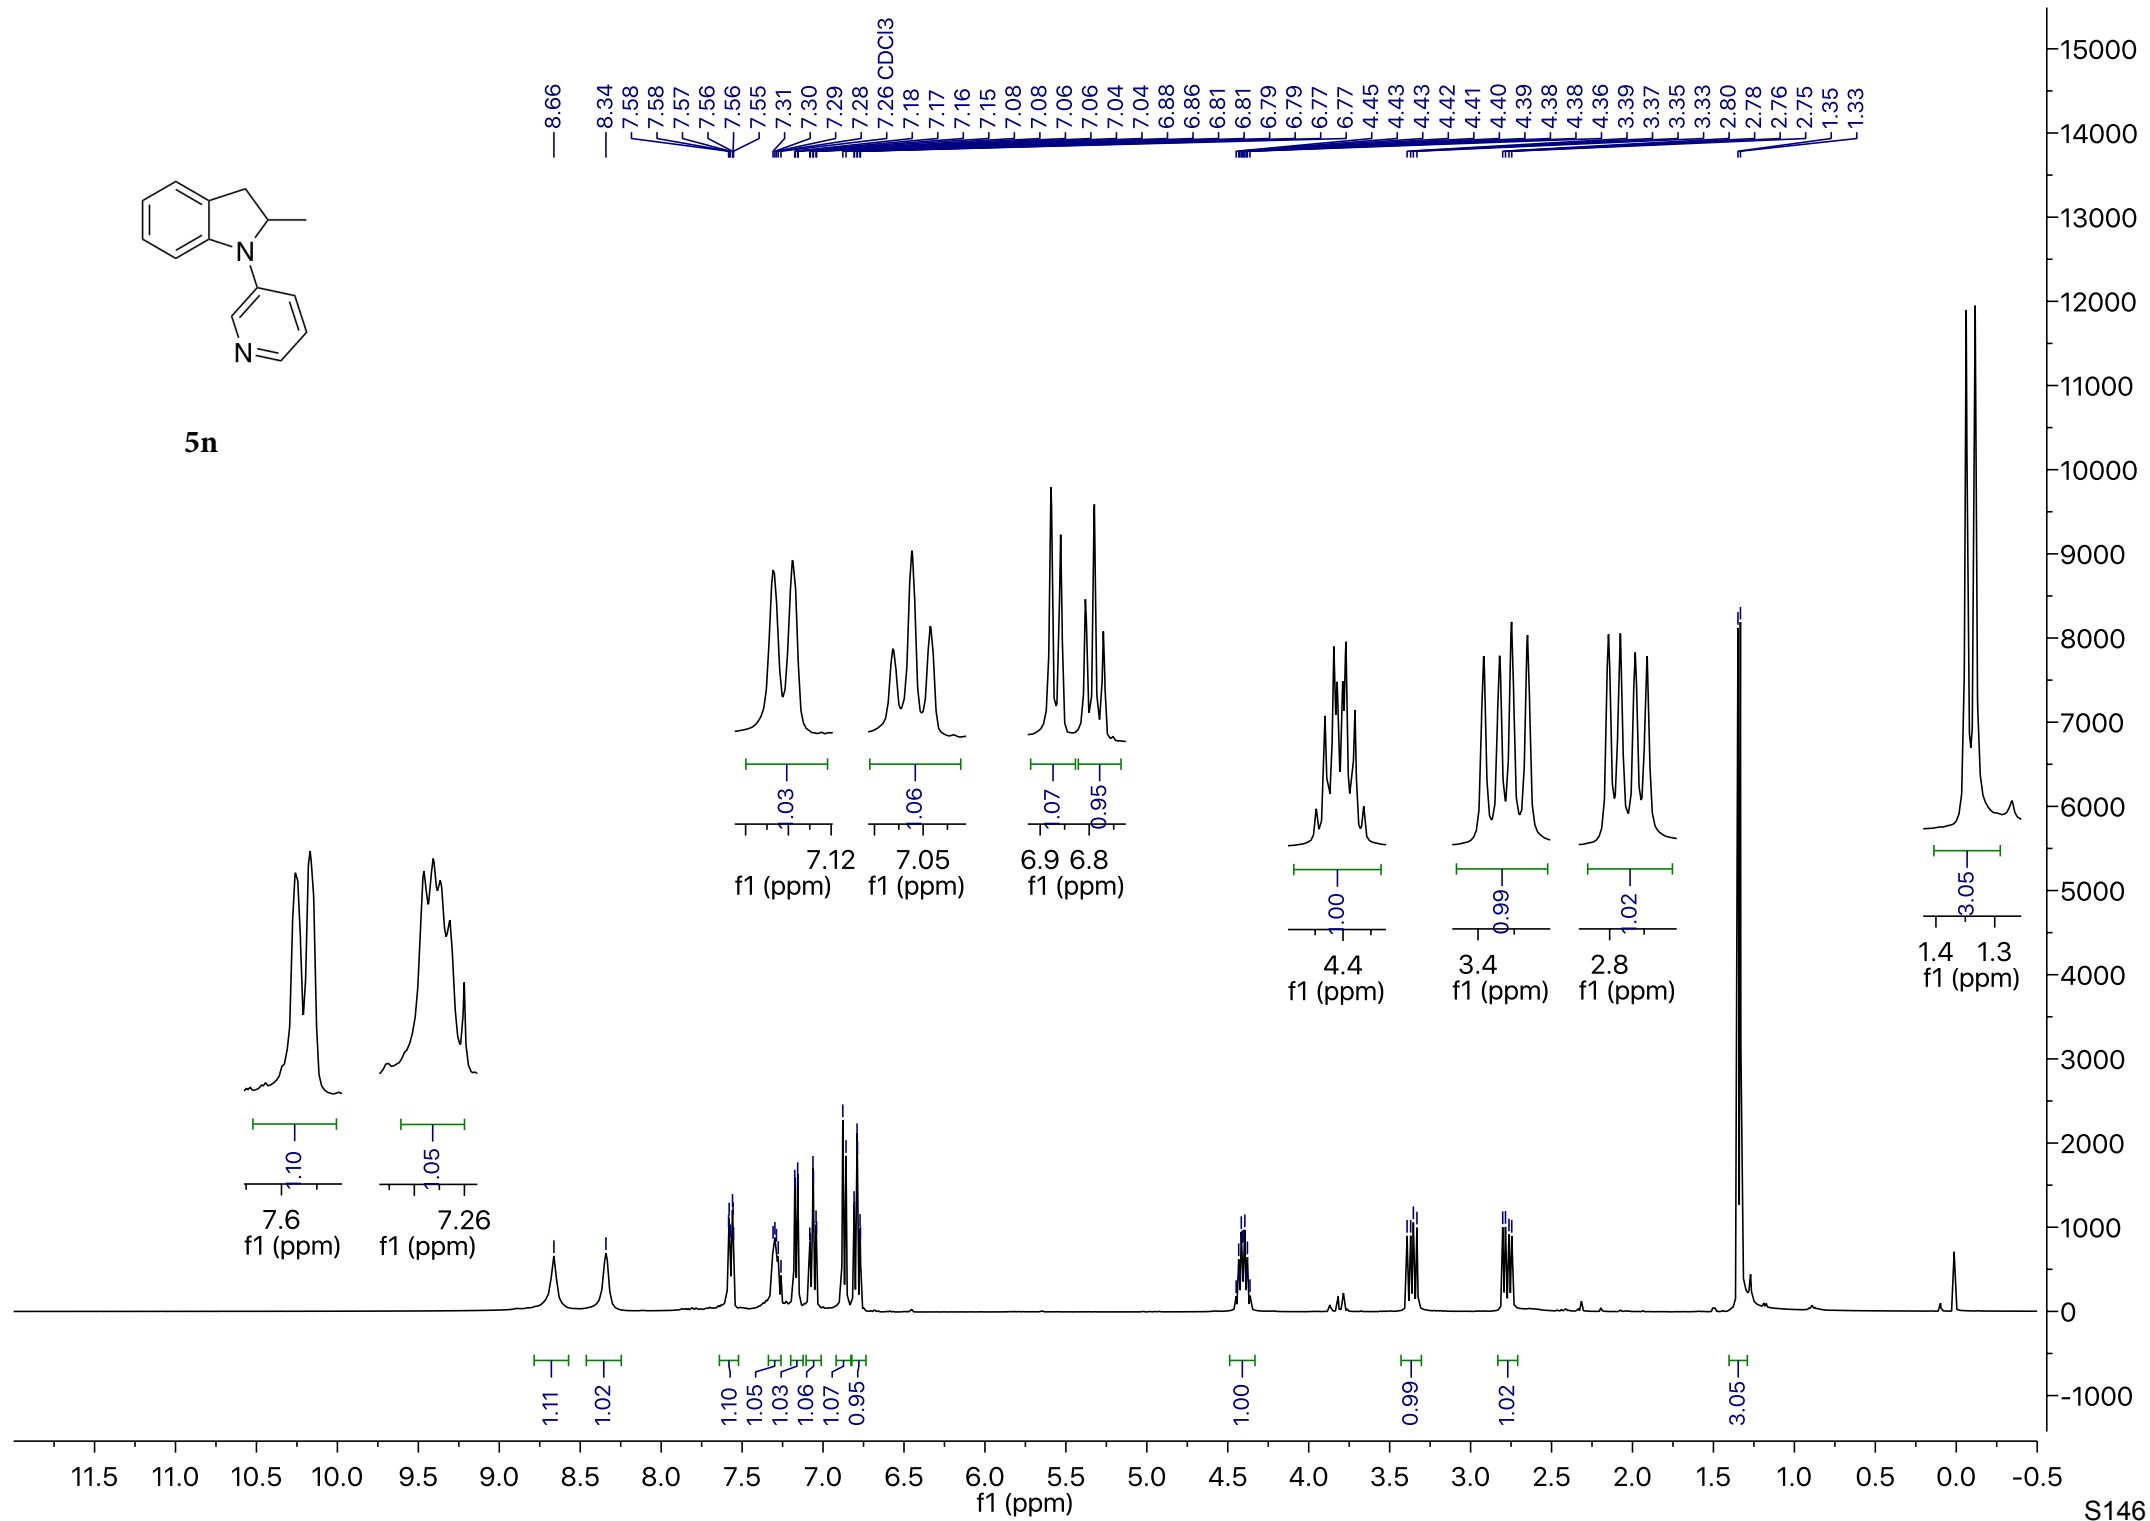

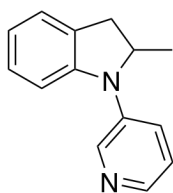

5n

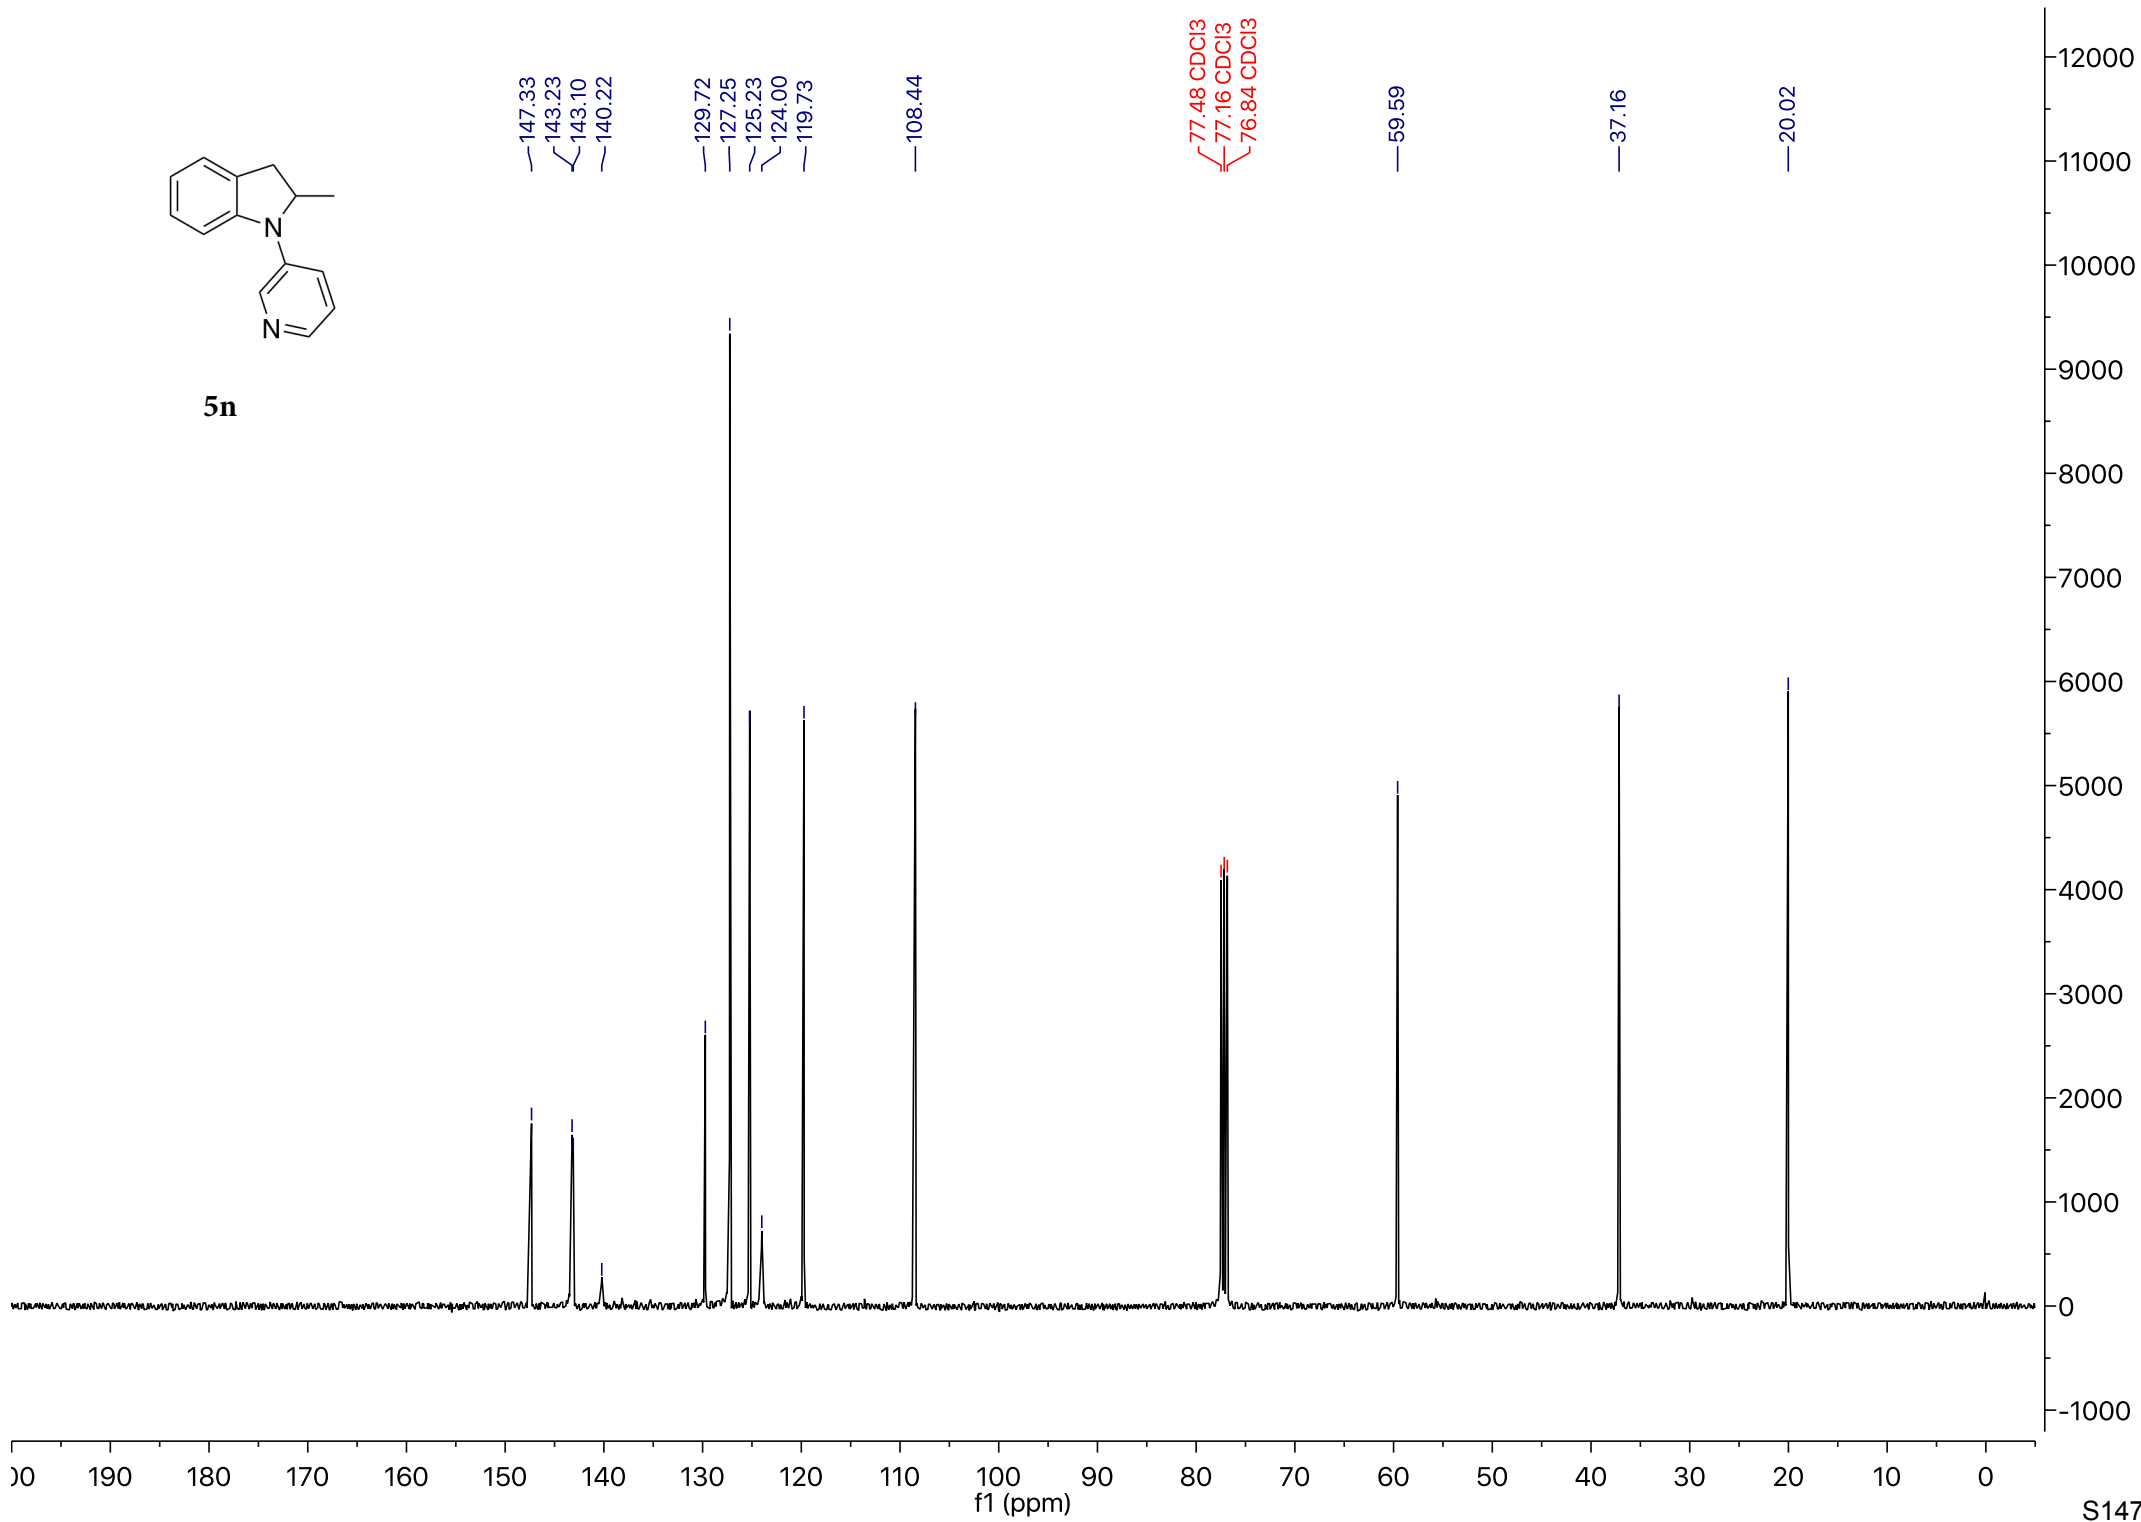



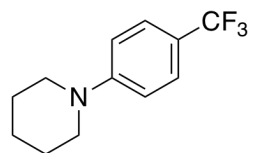

5o

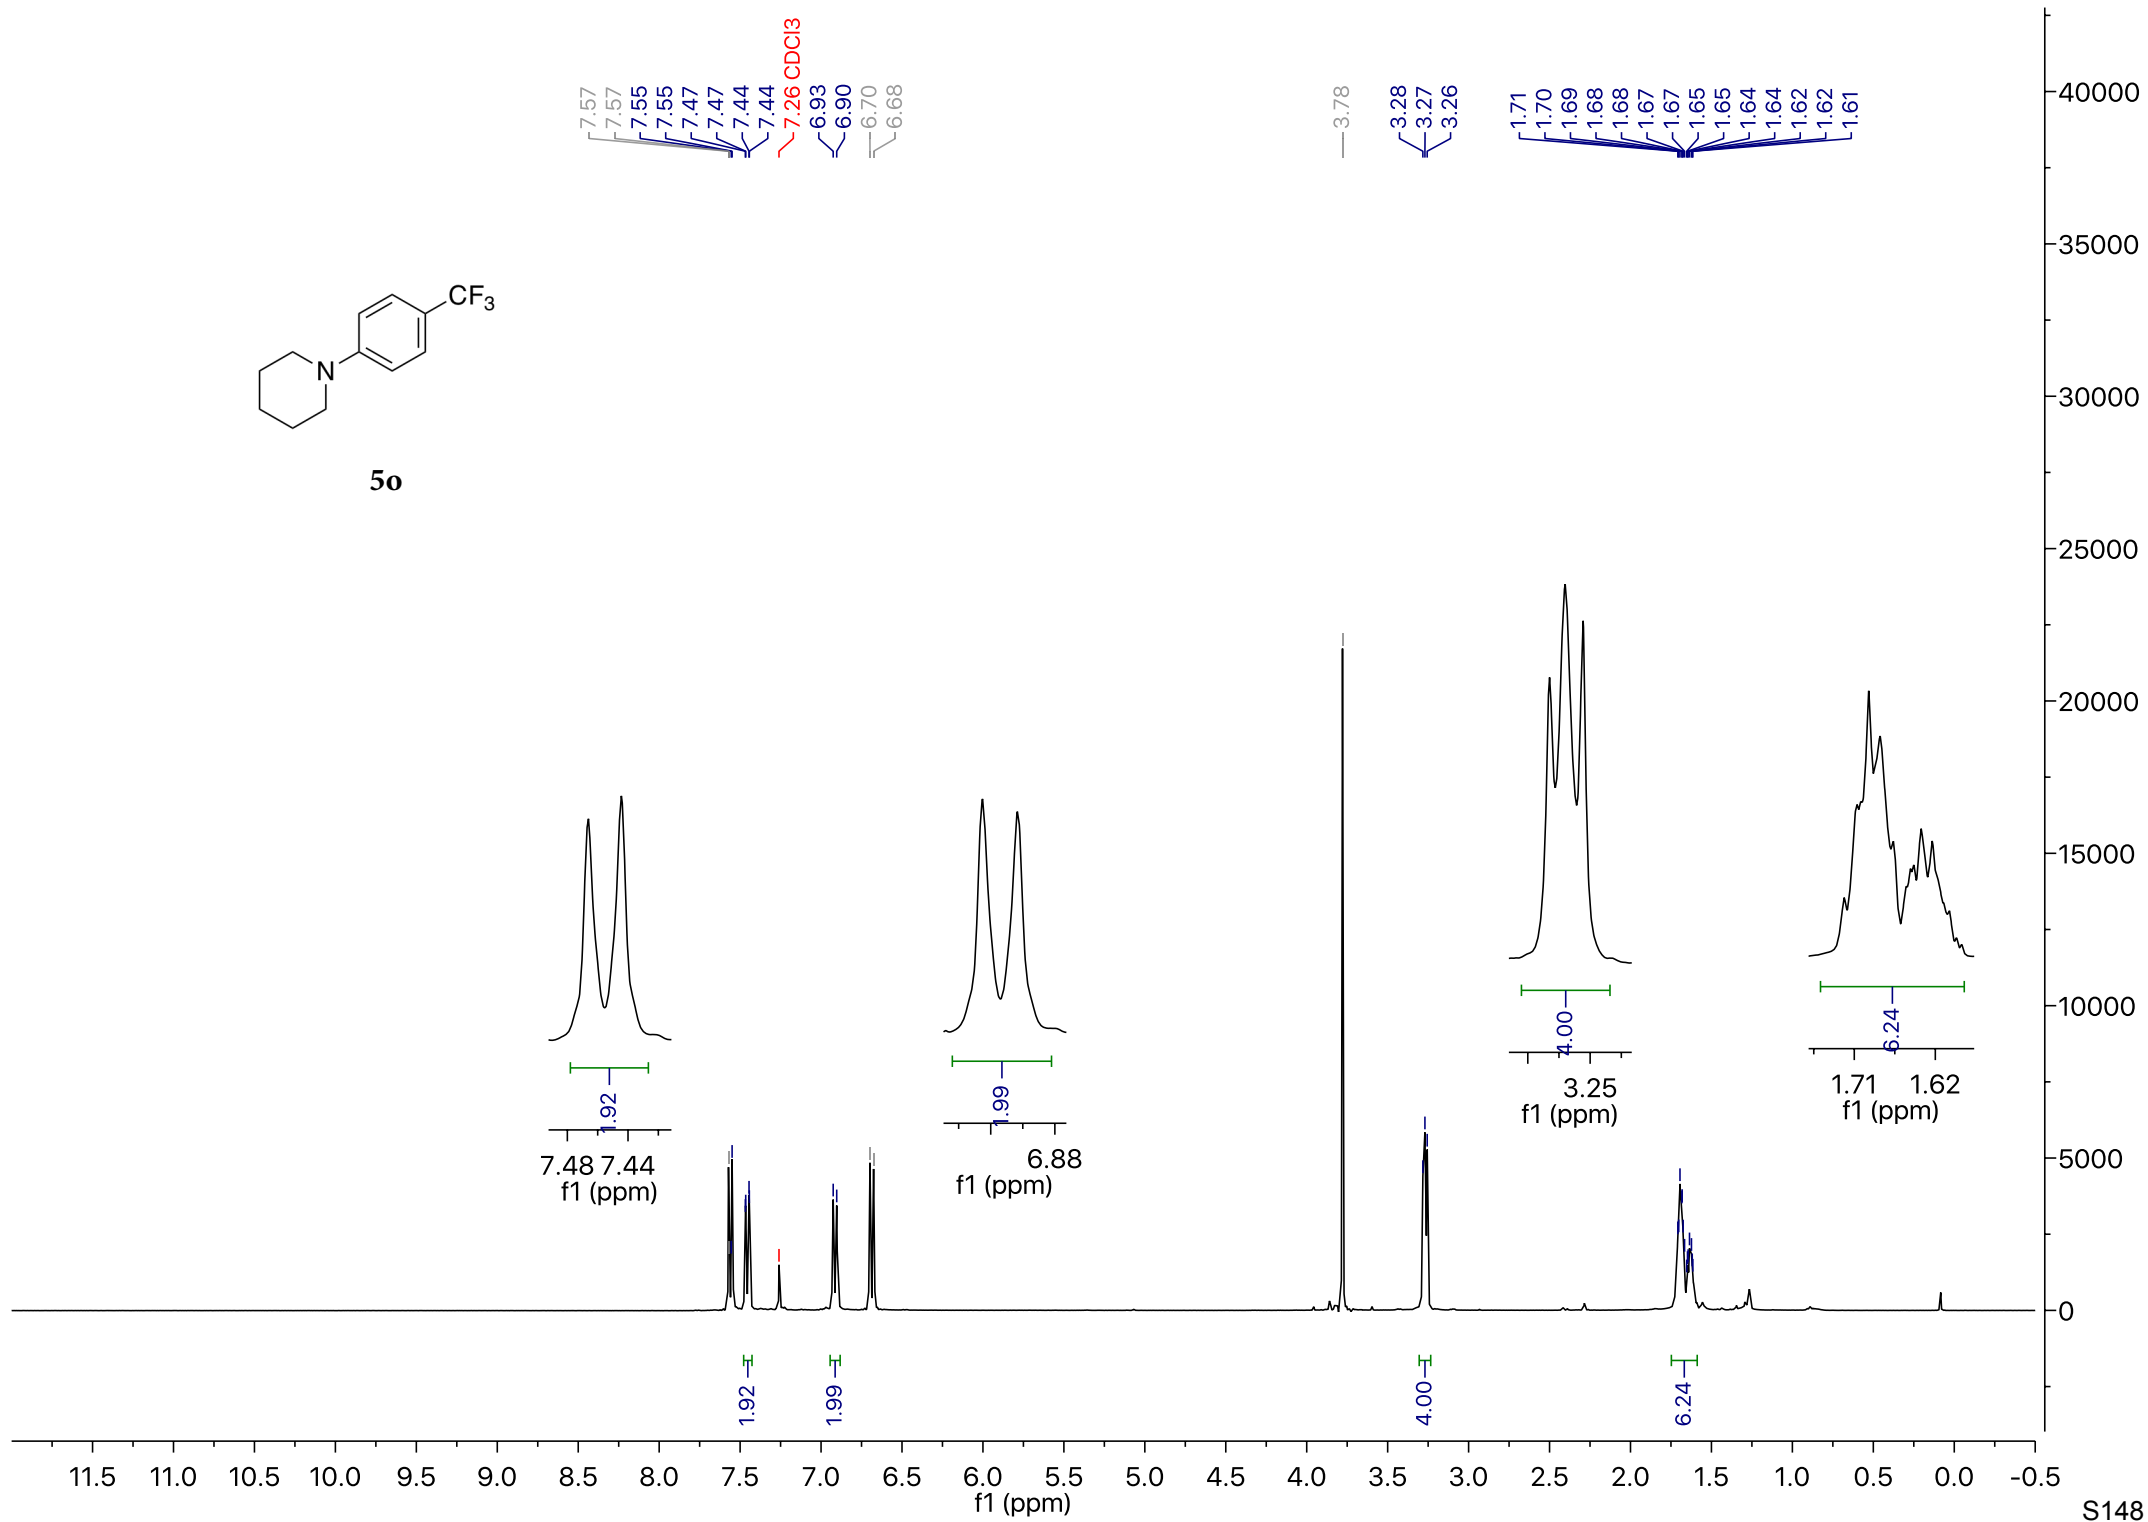

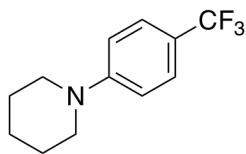

5o

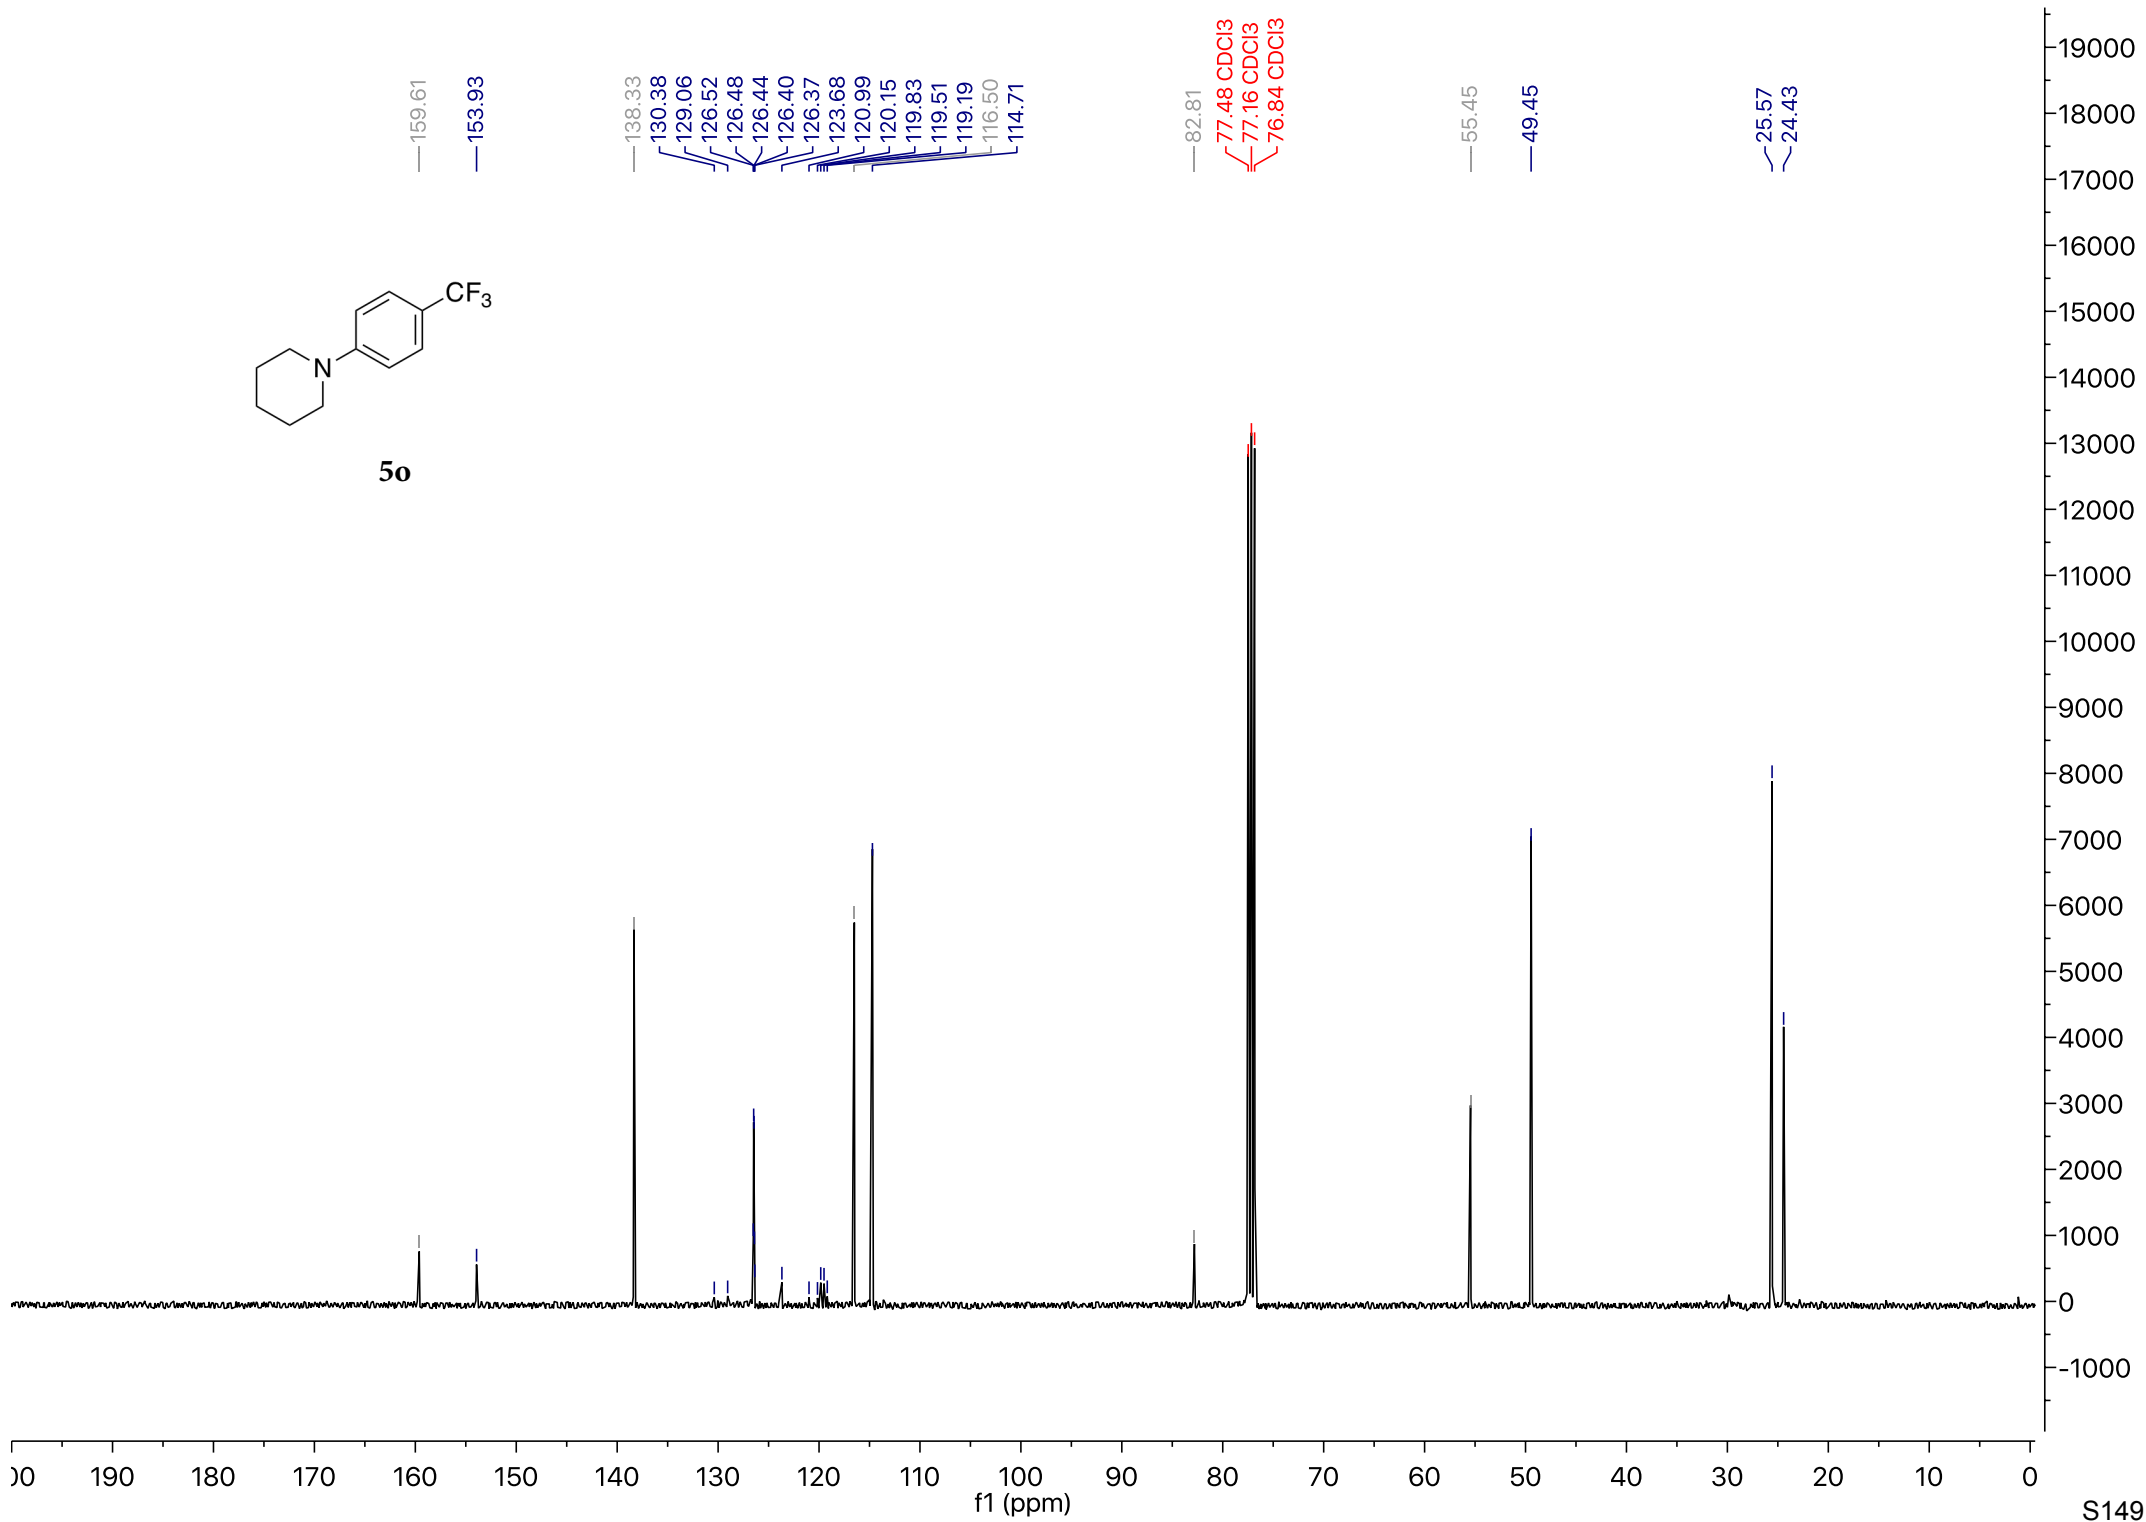

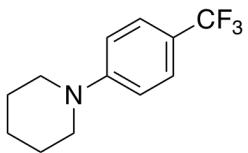

**5o**

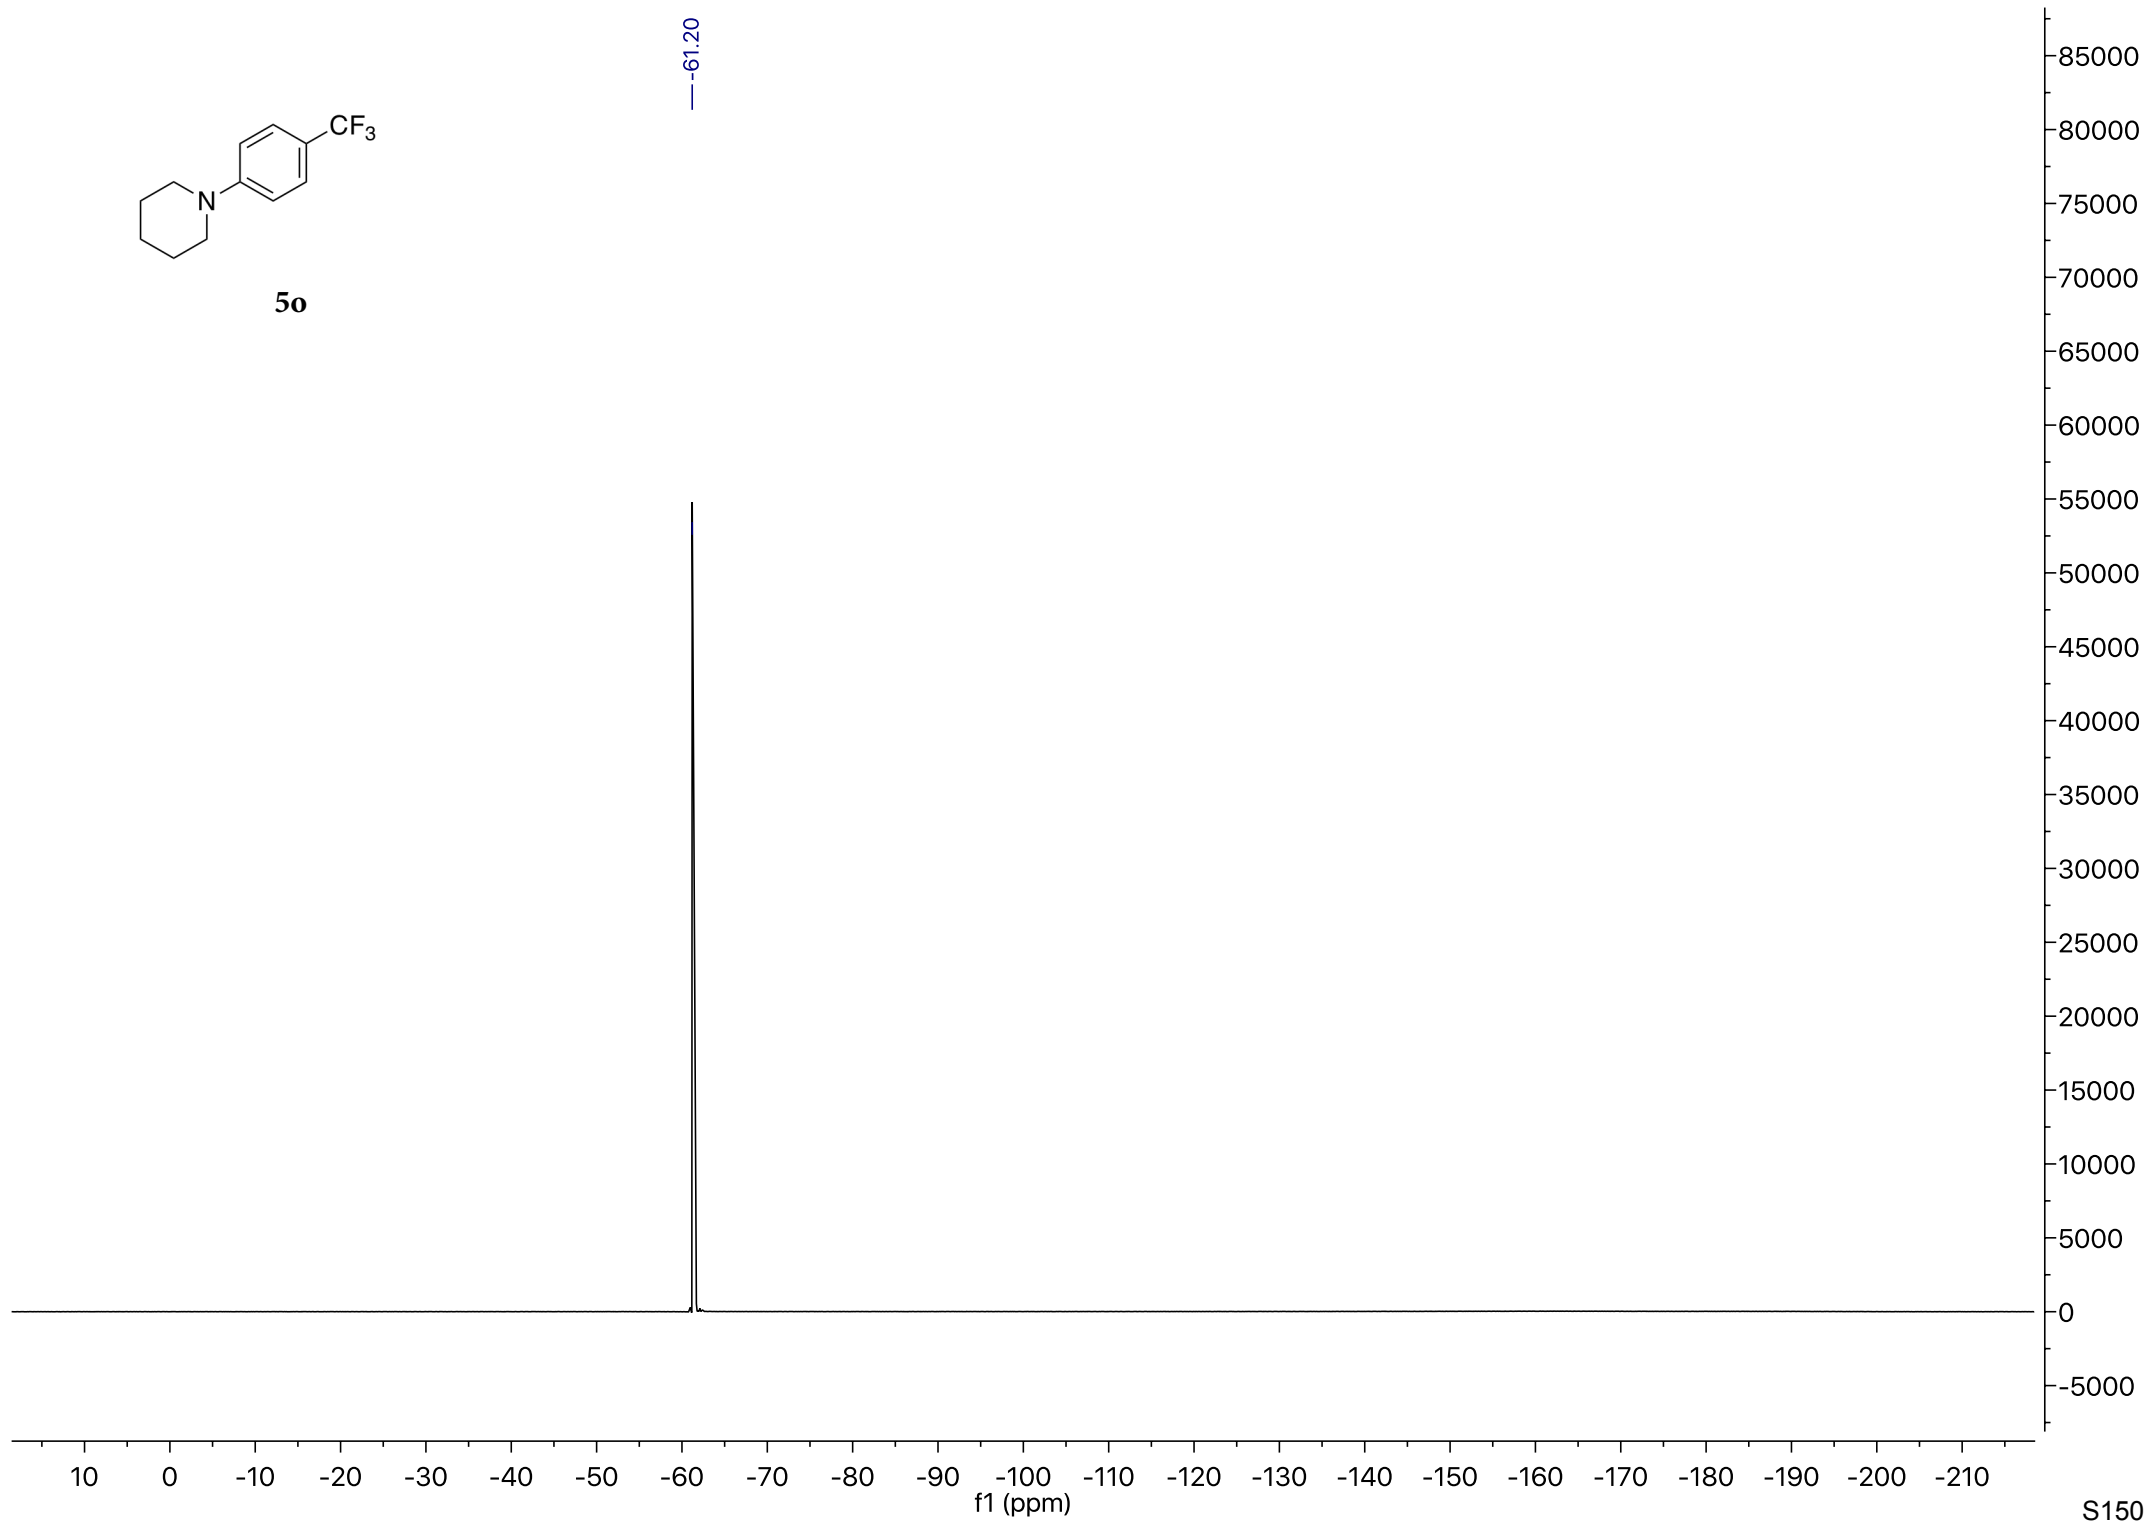

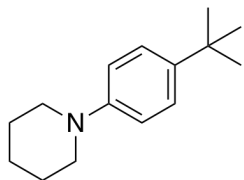

5p

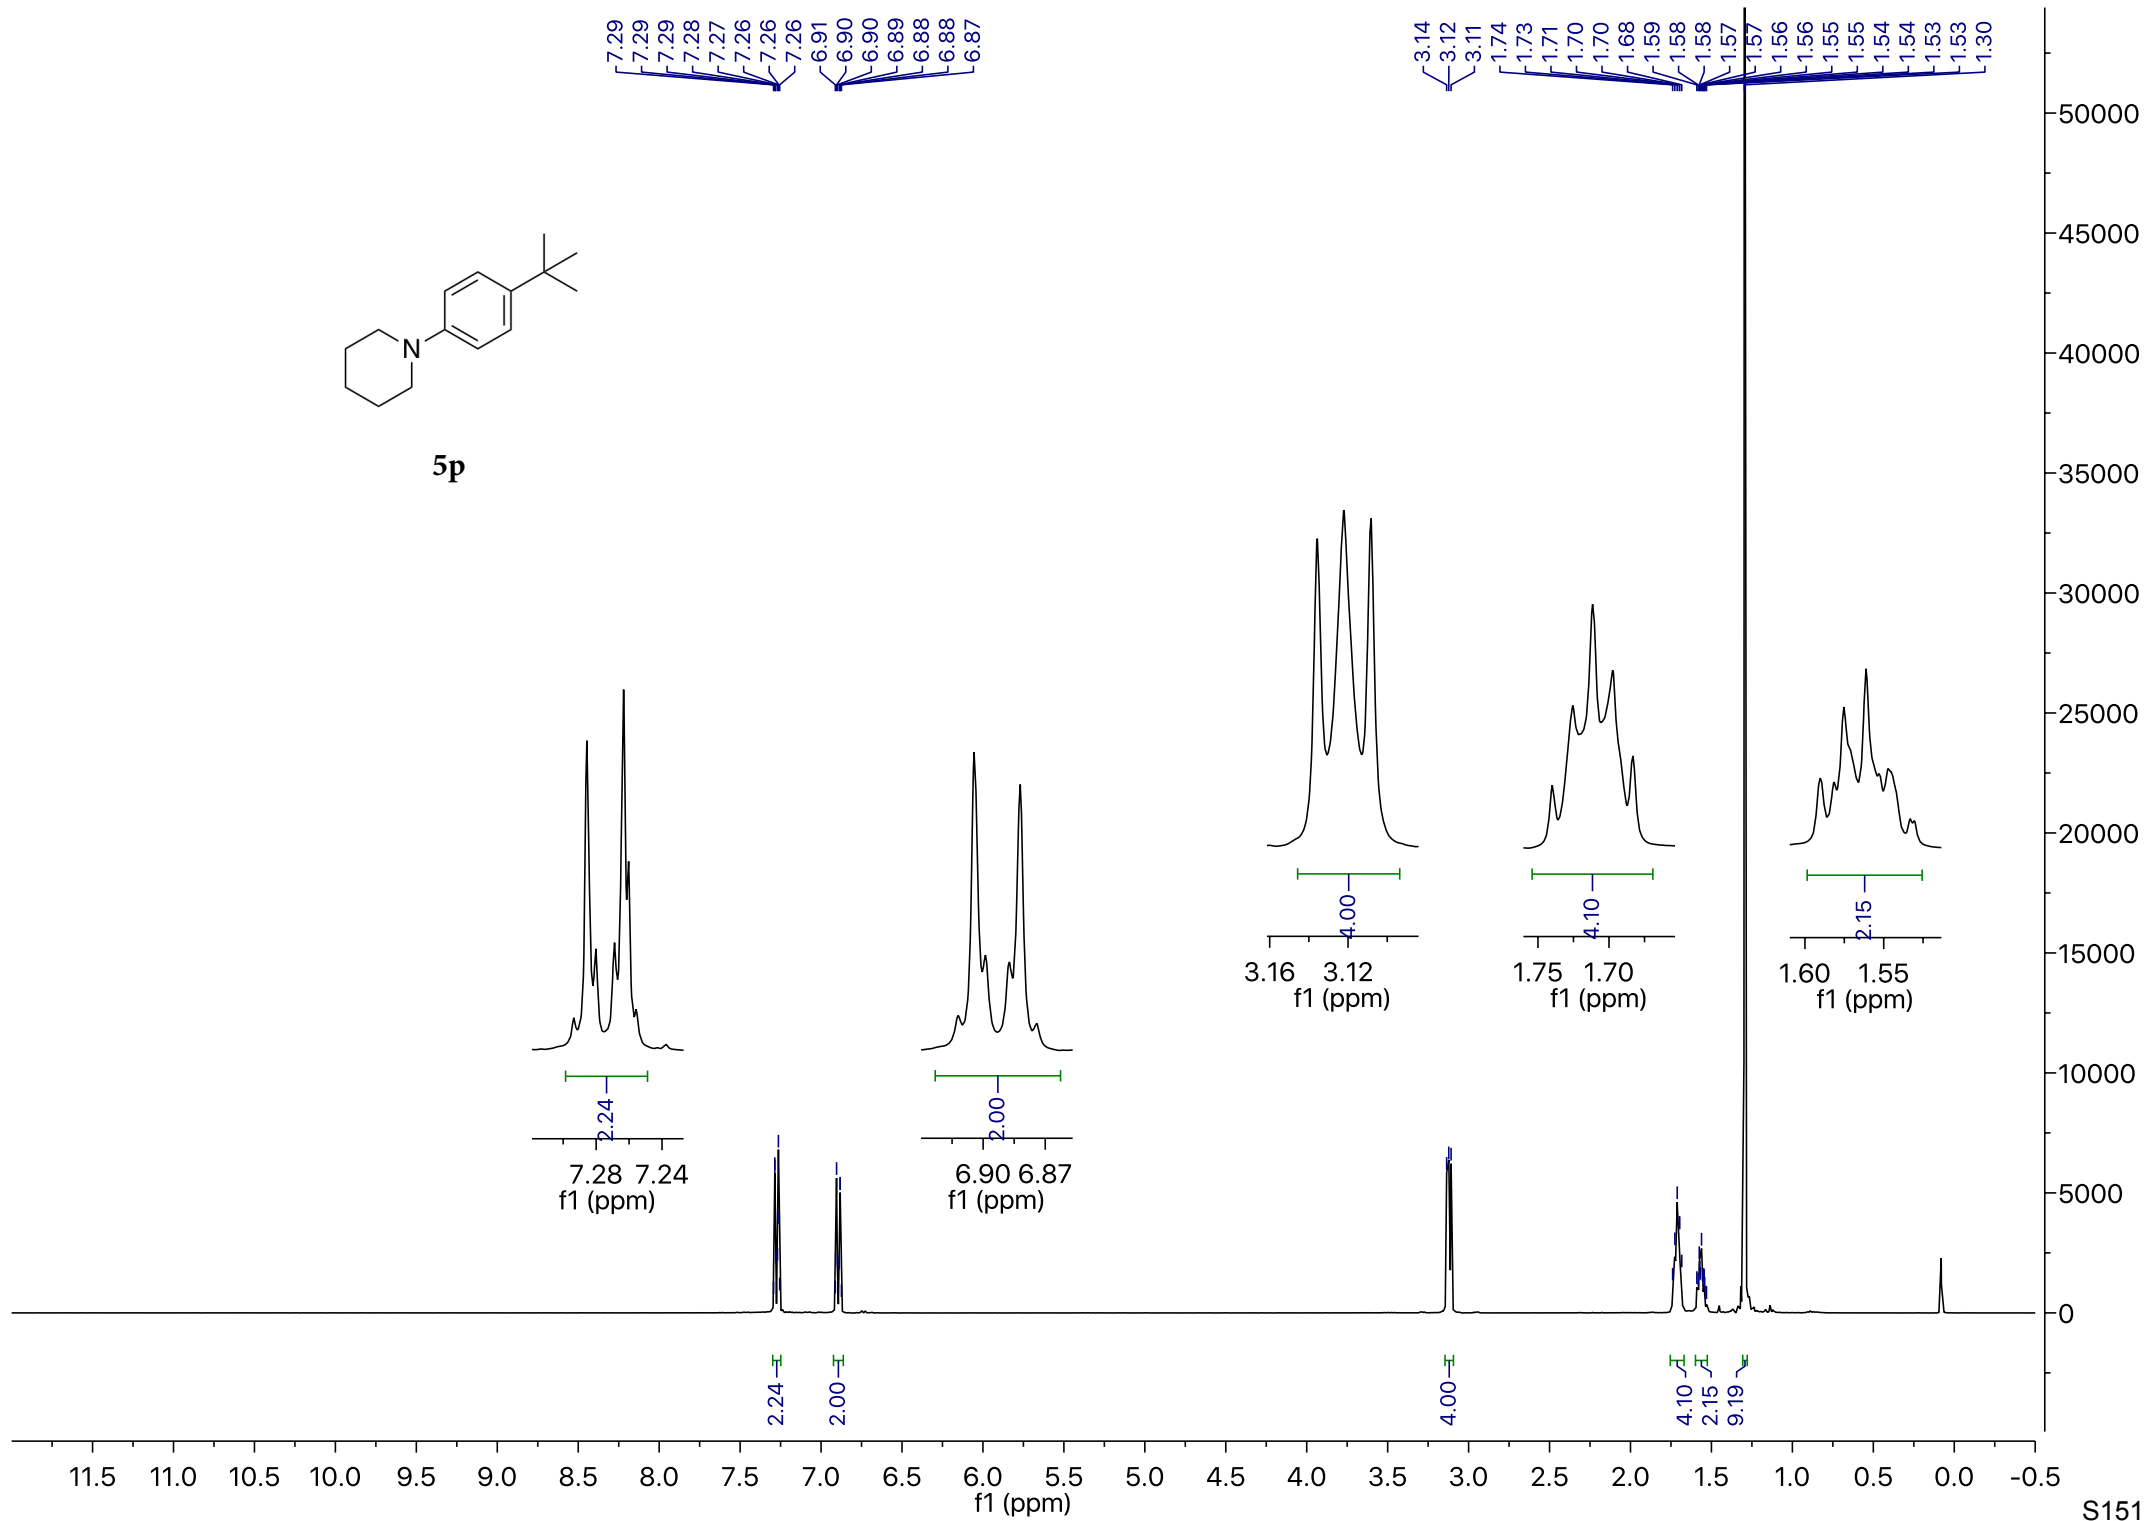

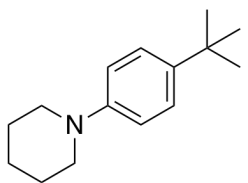

5p

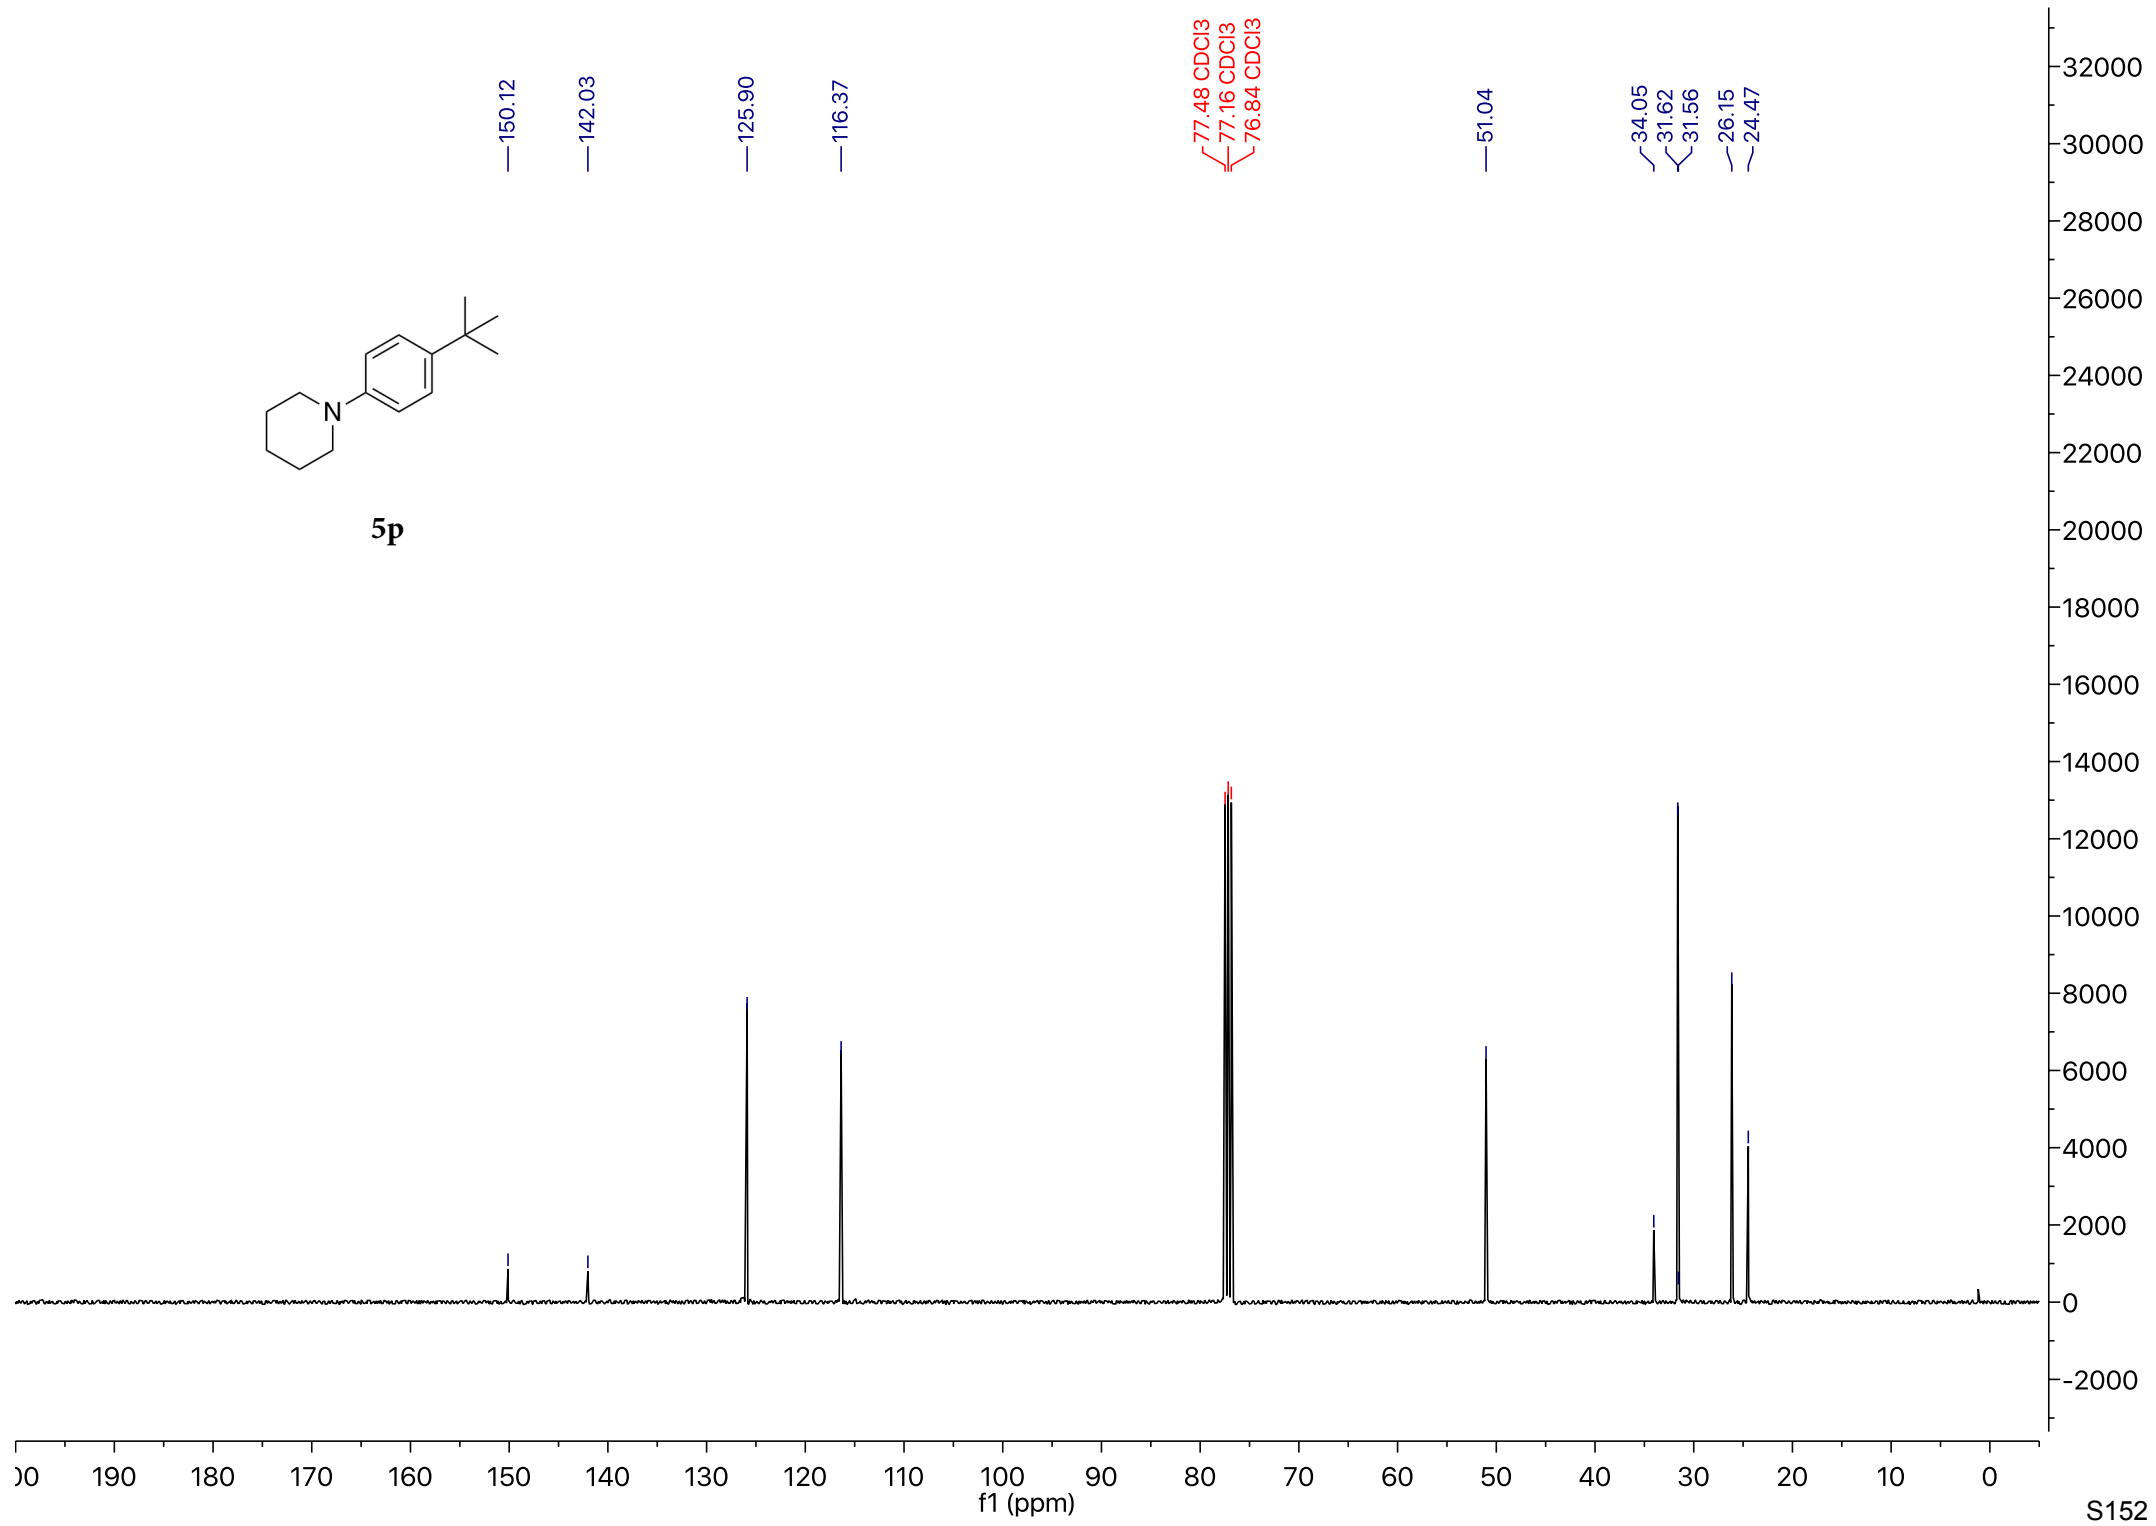

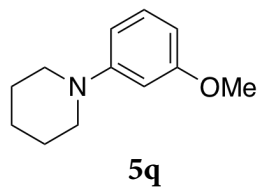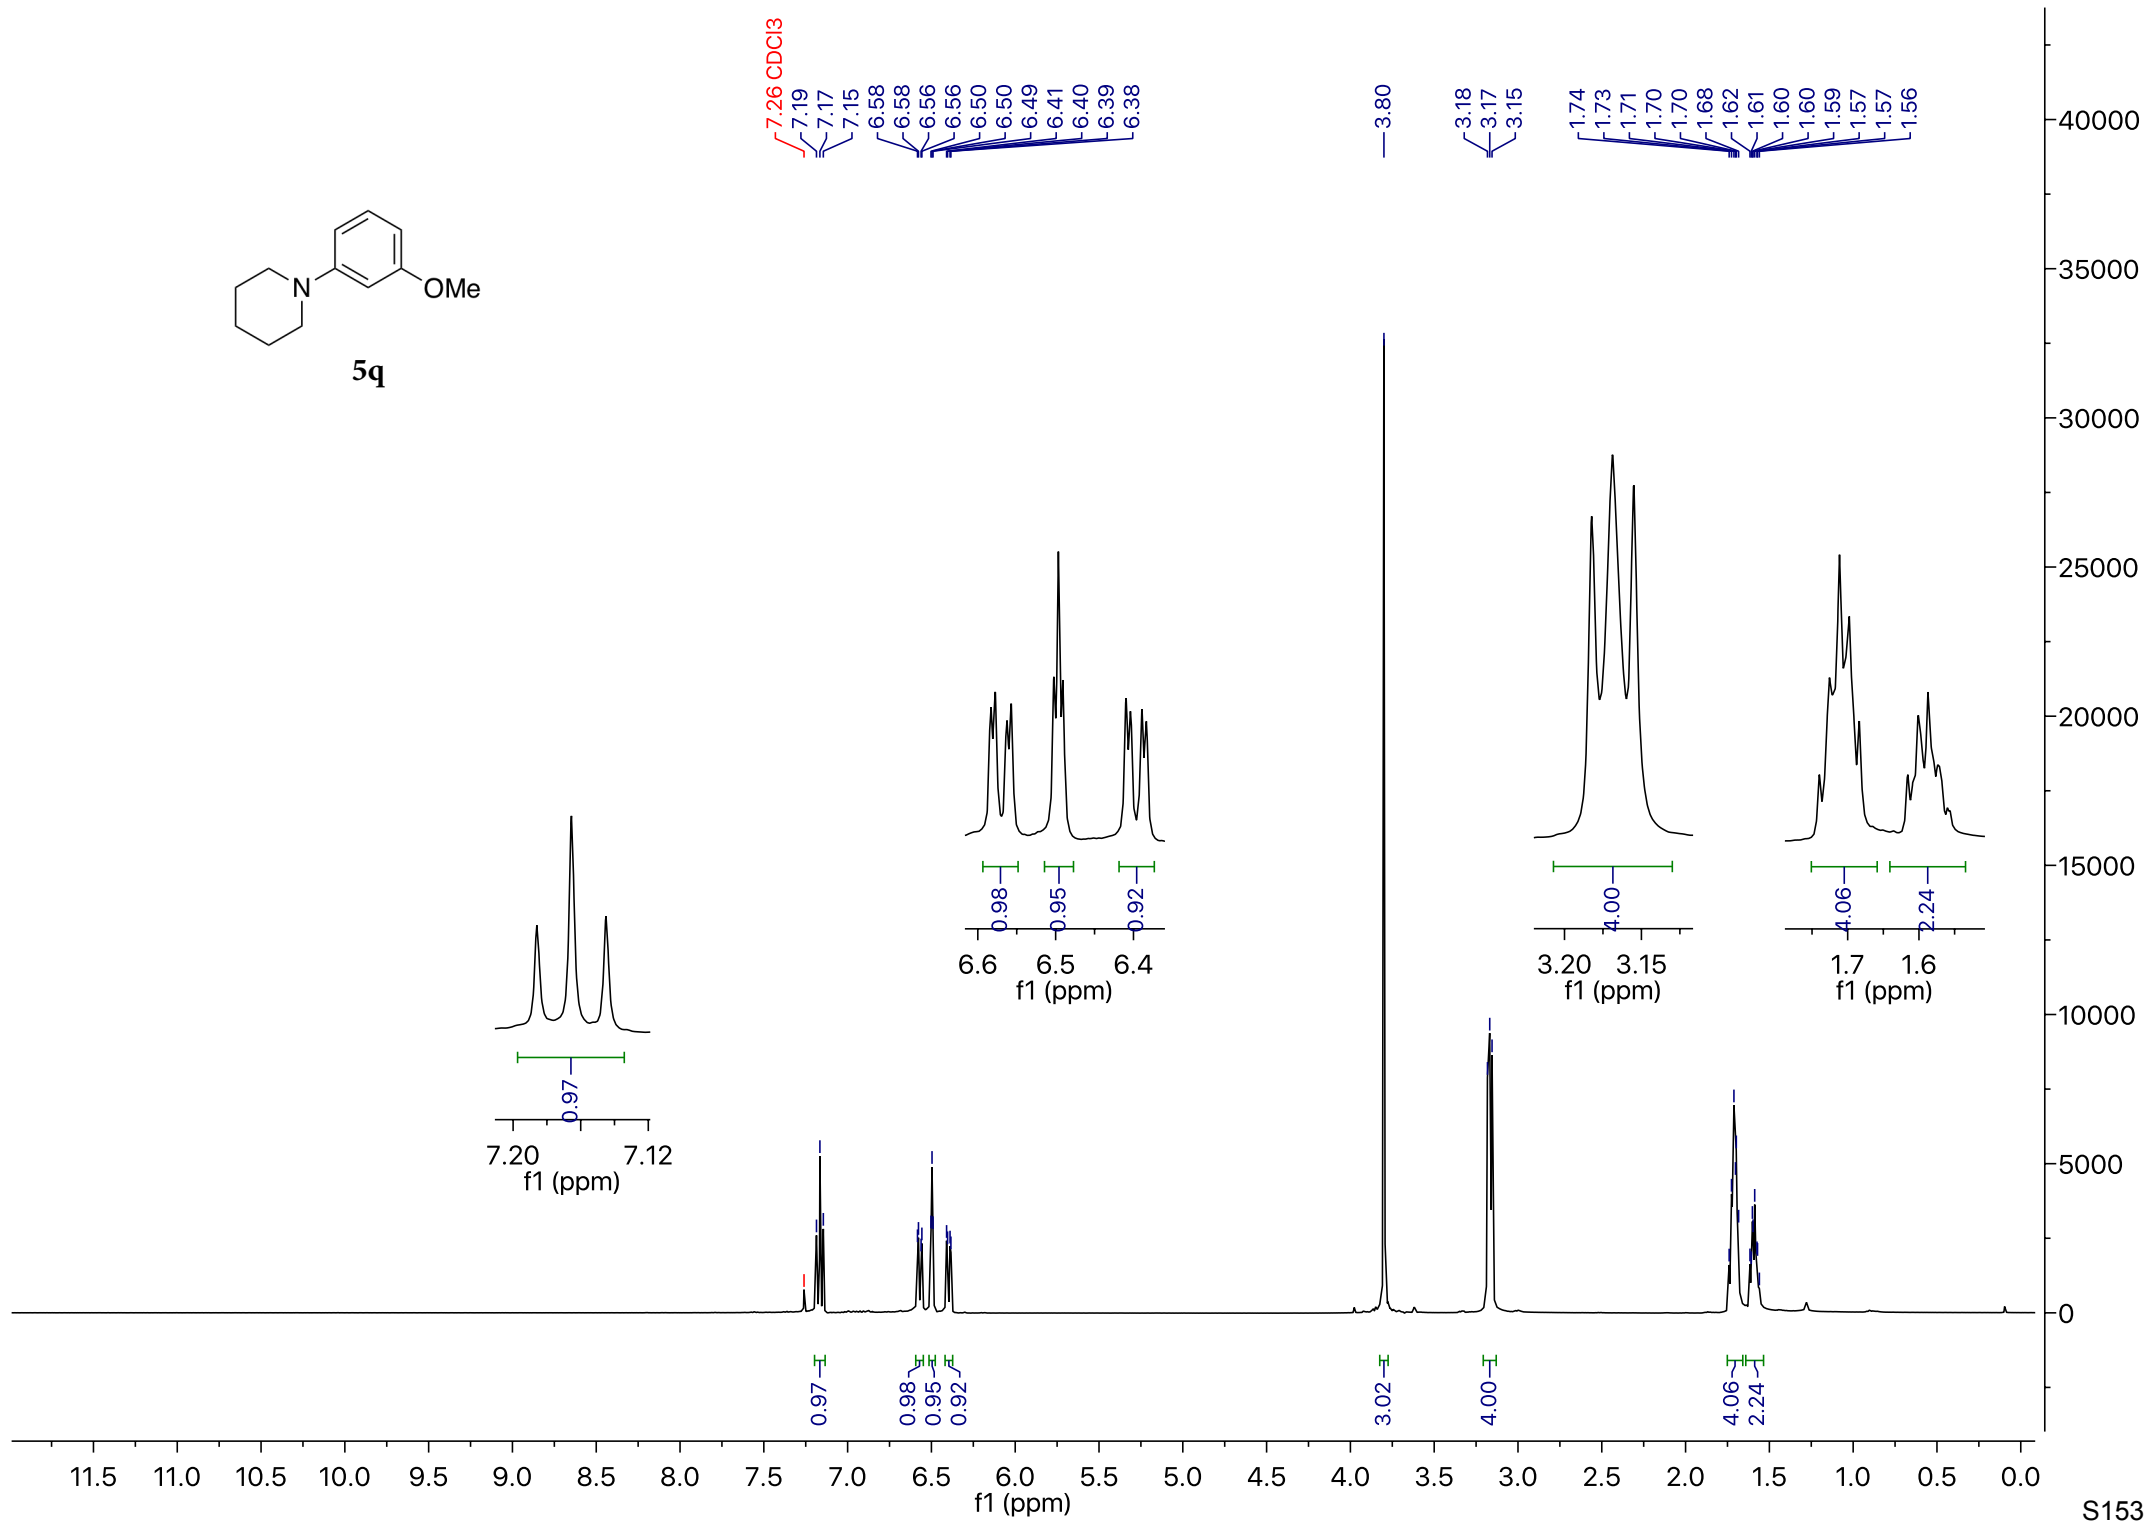

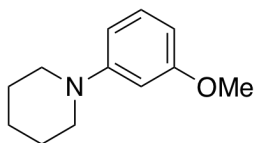

5q

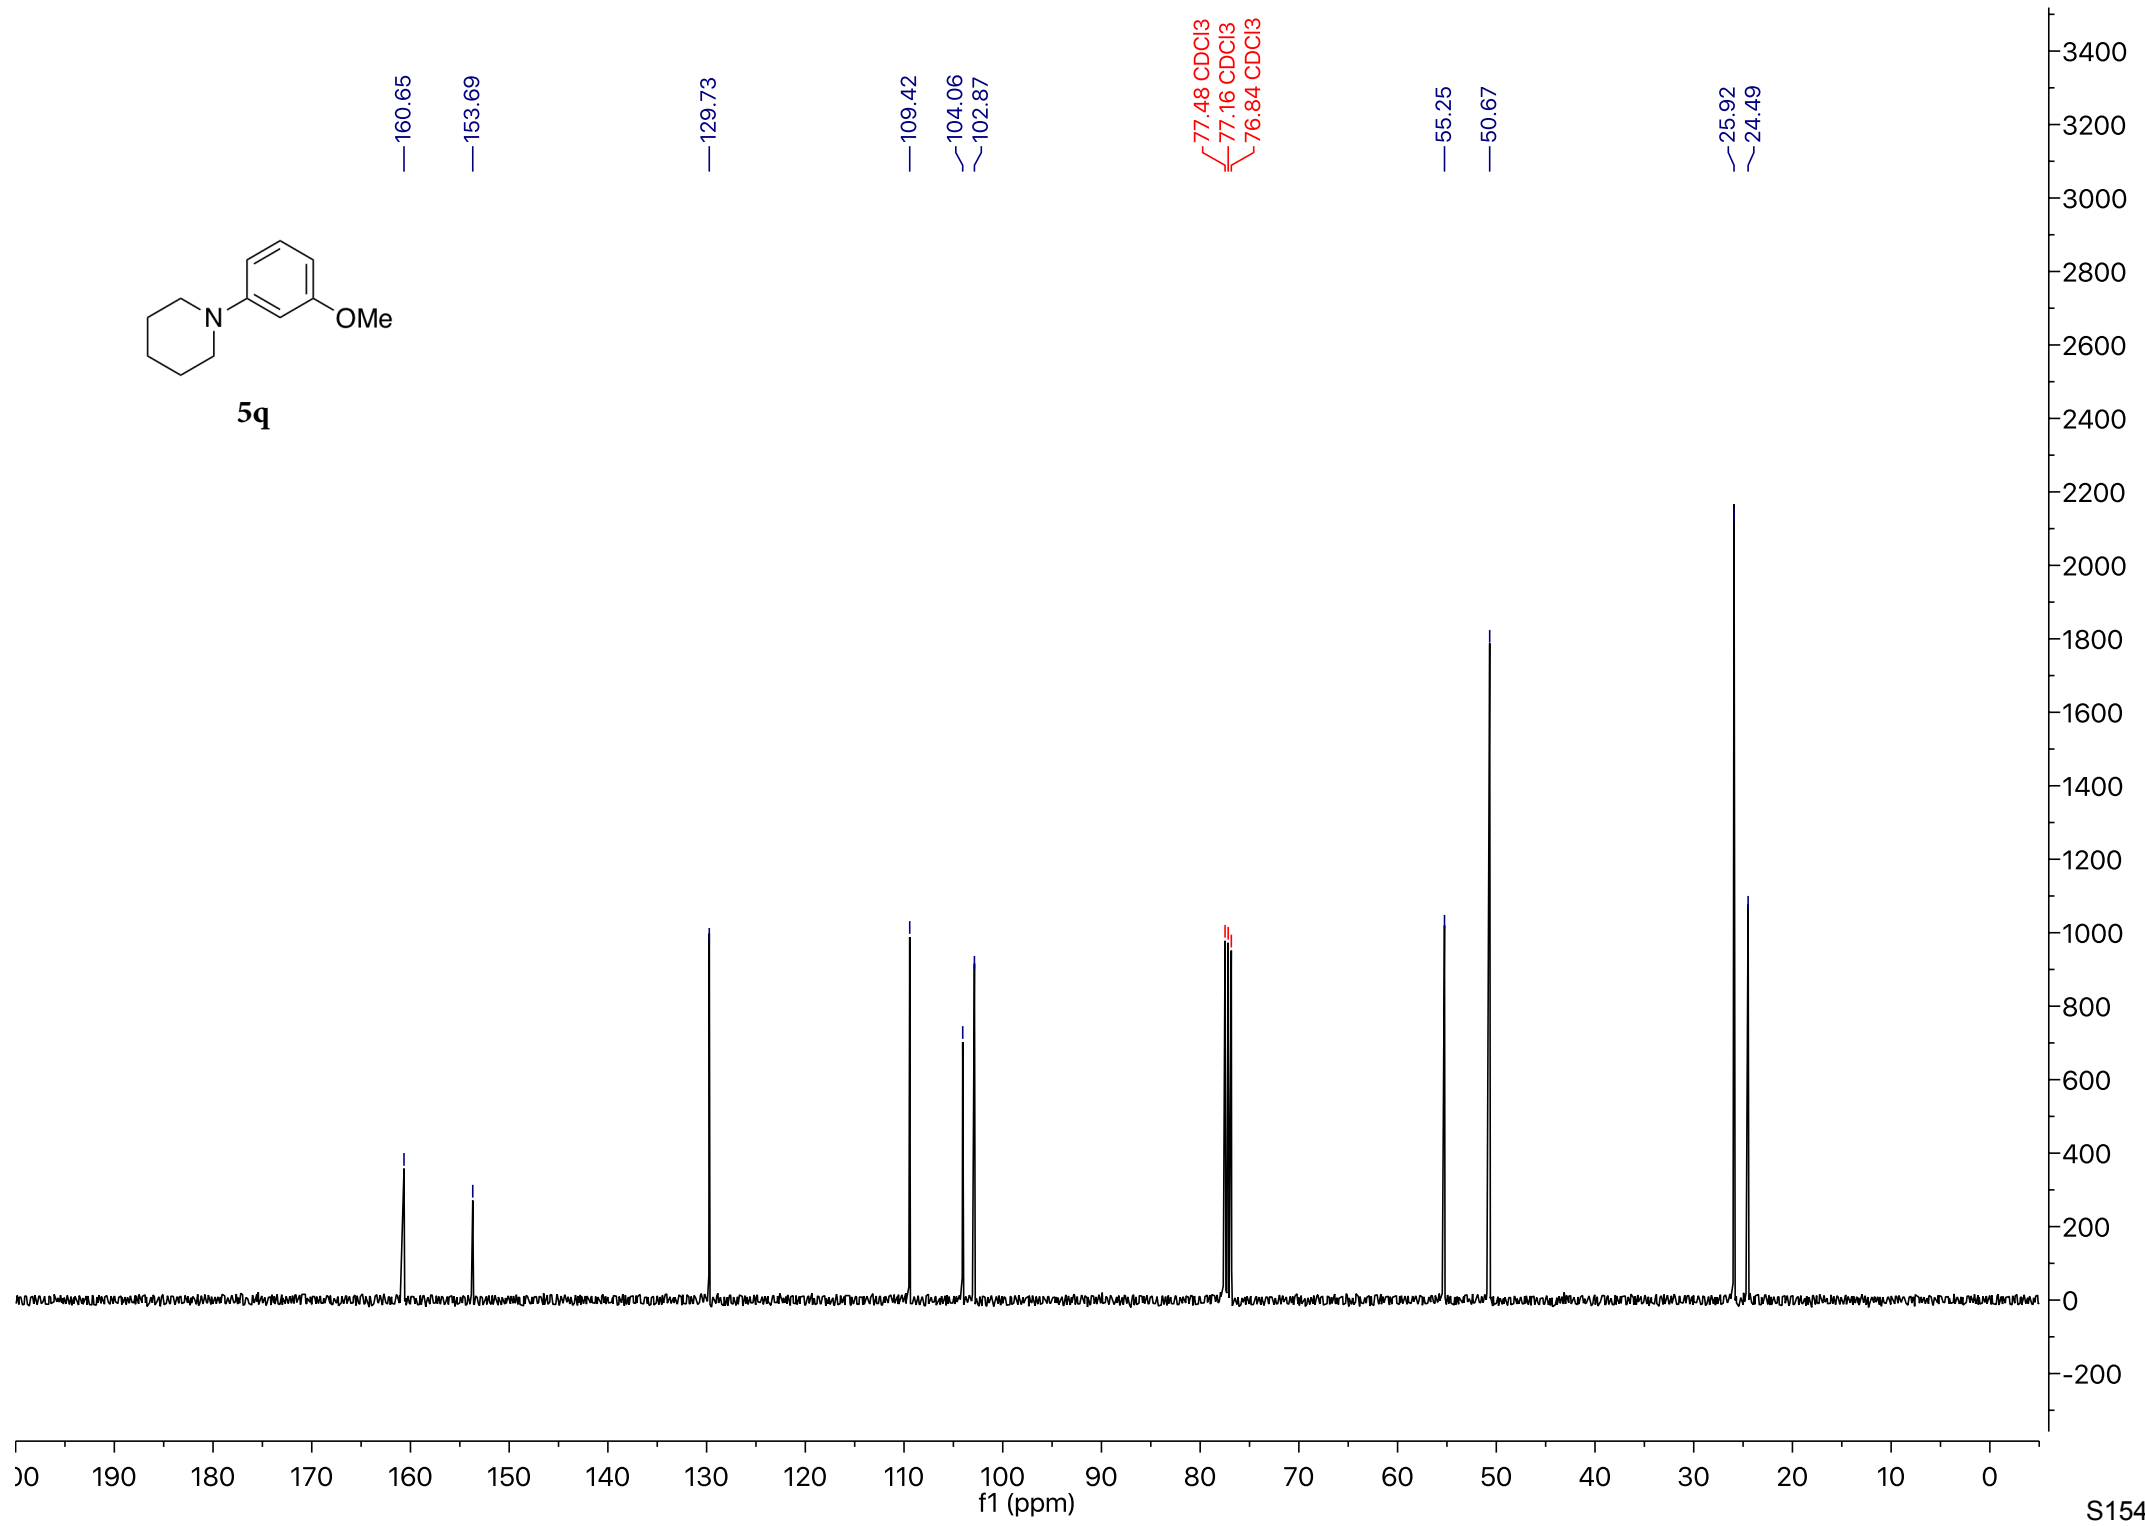

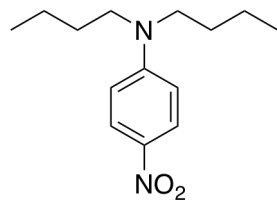

5r

8.11  
8.10  
8.10  
8.08  
8.08  
8.07

— 7.26 CDCl<sub>3</sub>

6.57  
6.56  
6.55  
6.54  
6.53  
6.52

3.38  
3.36  
3.36  
3.36  
3.34  
1.64  
1.63  
1.63  
1.62  
1.62  
1.61  
1.61  
1.60  
1.59  
1.59  
1.58  
1.57  
1.43  
1.43  
1.41  
1.39  
1.39  
1.38  
1.37  
1.35  
1.33  
1.00  
0.98  
0.96

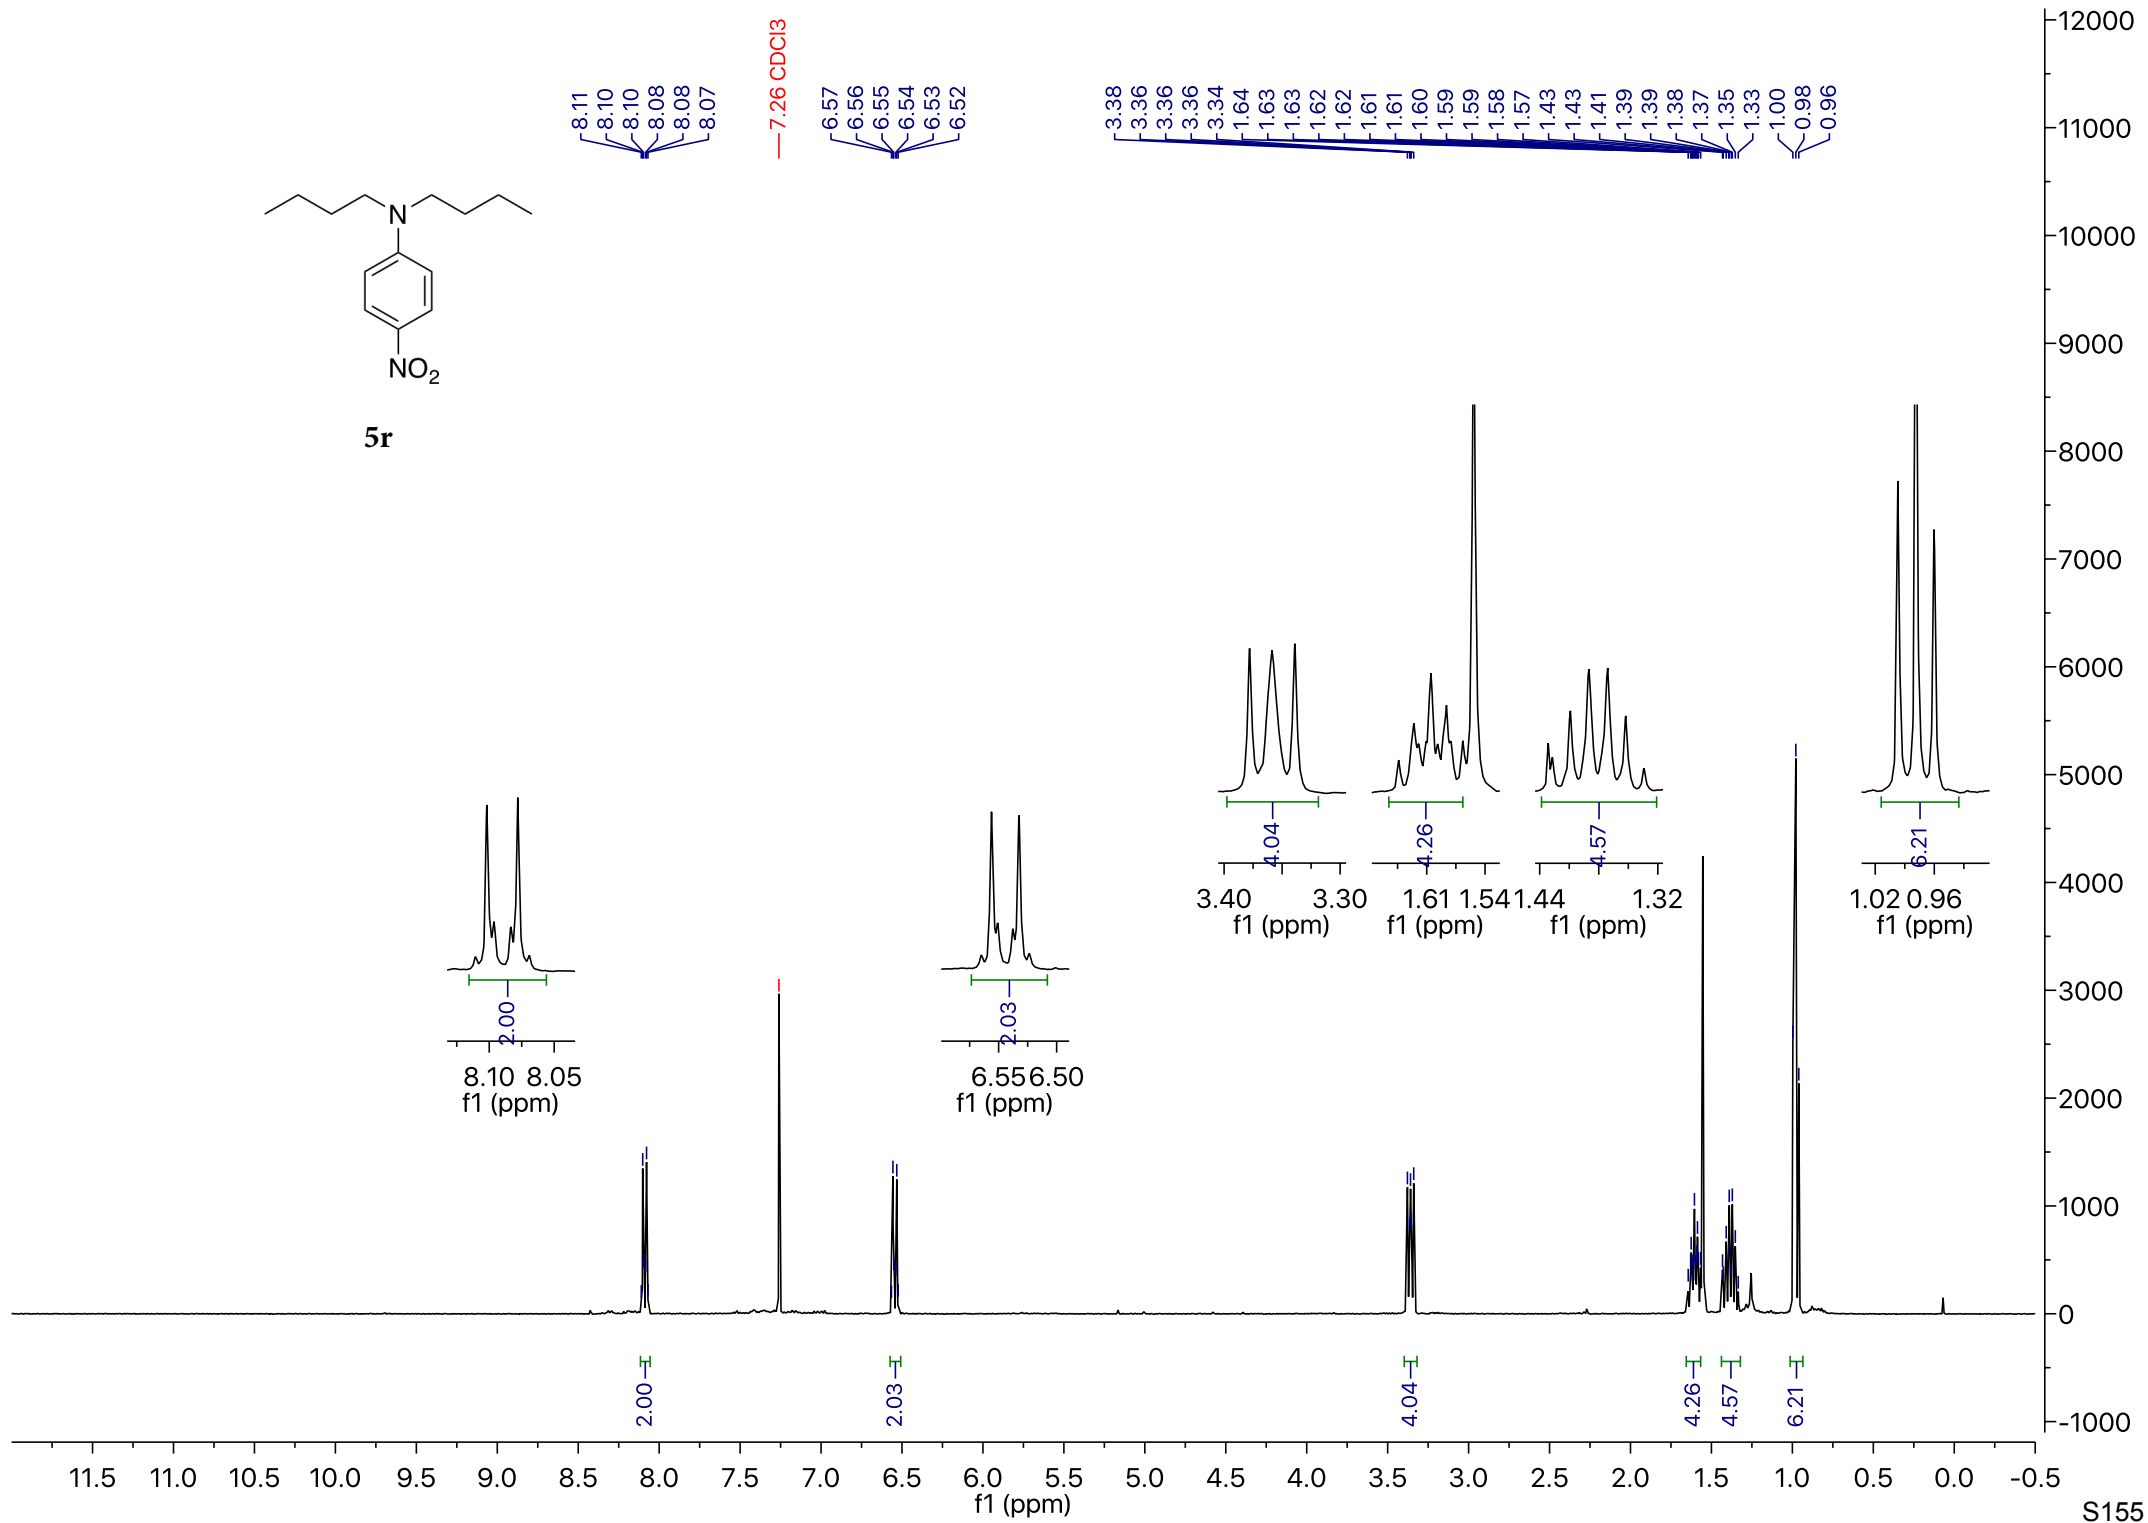



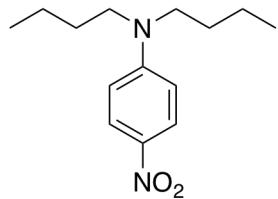

5r

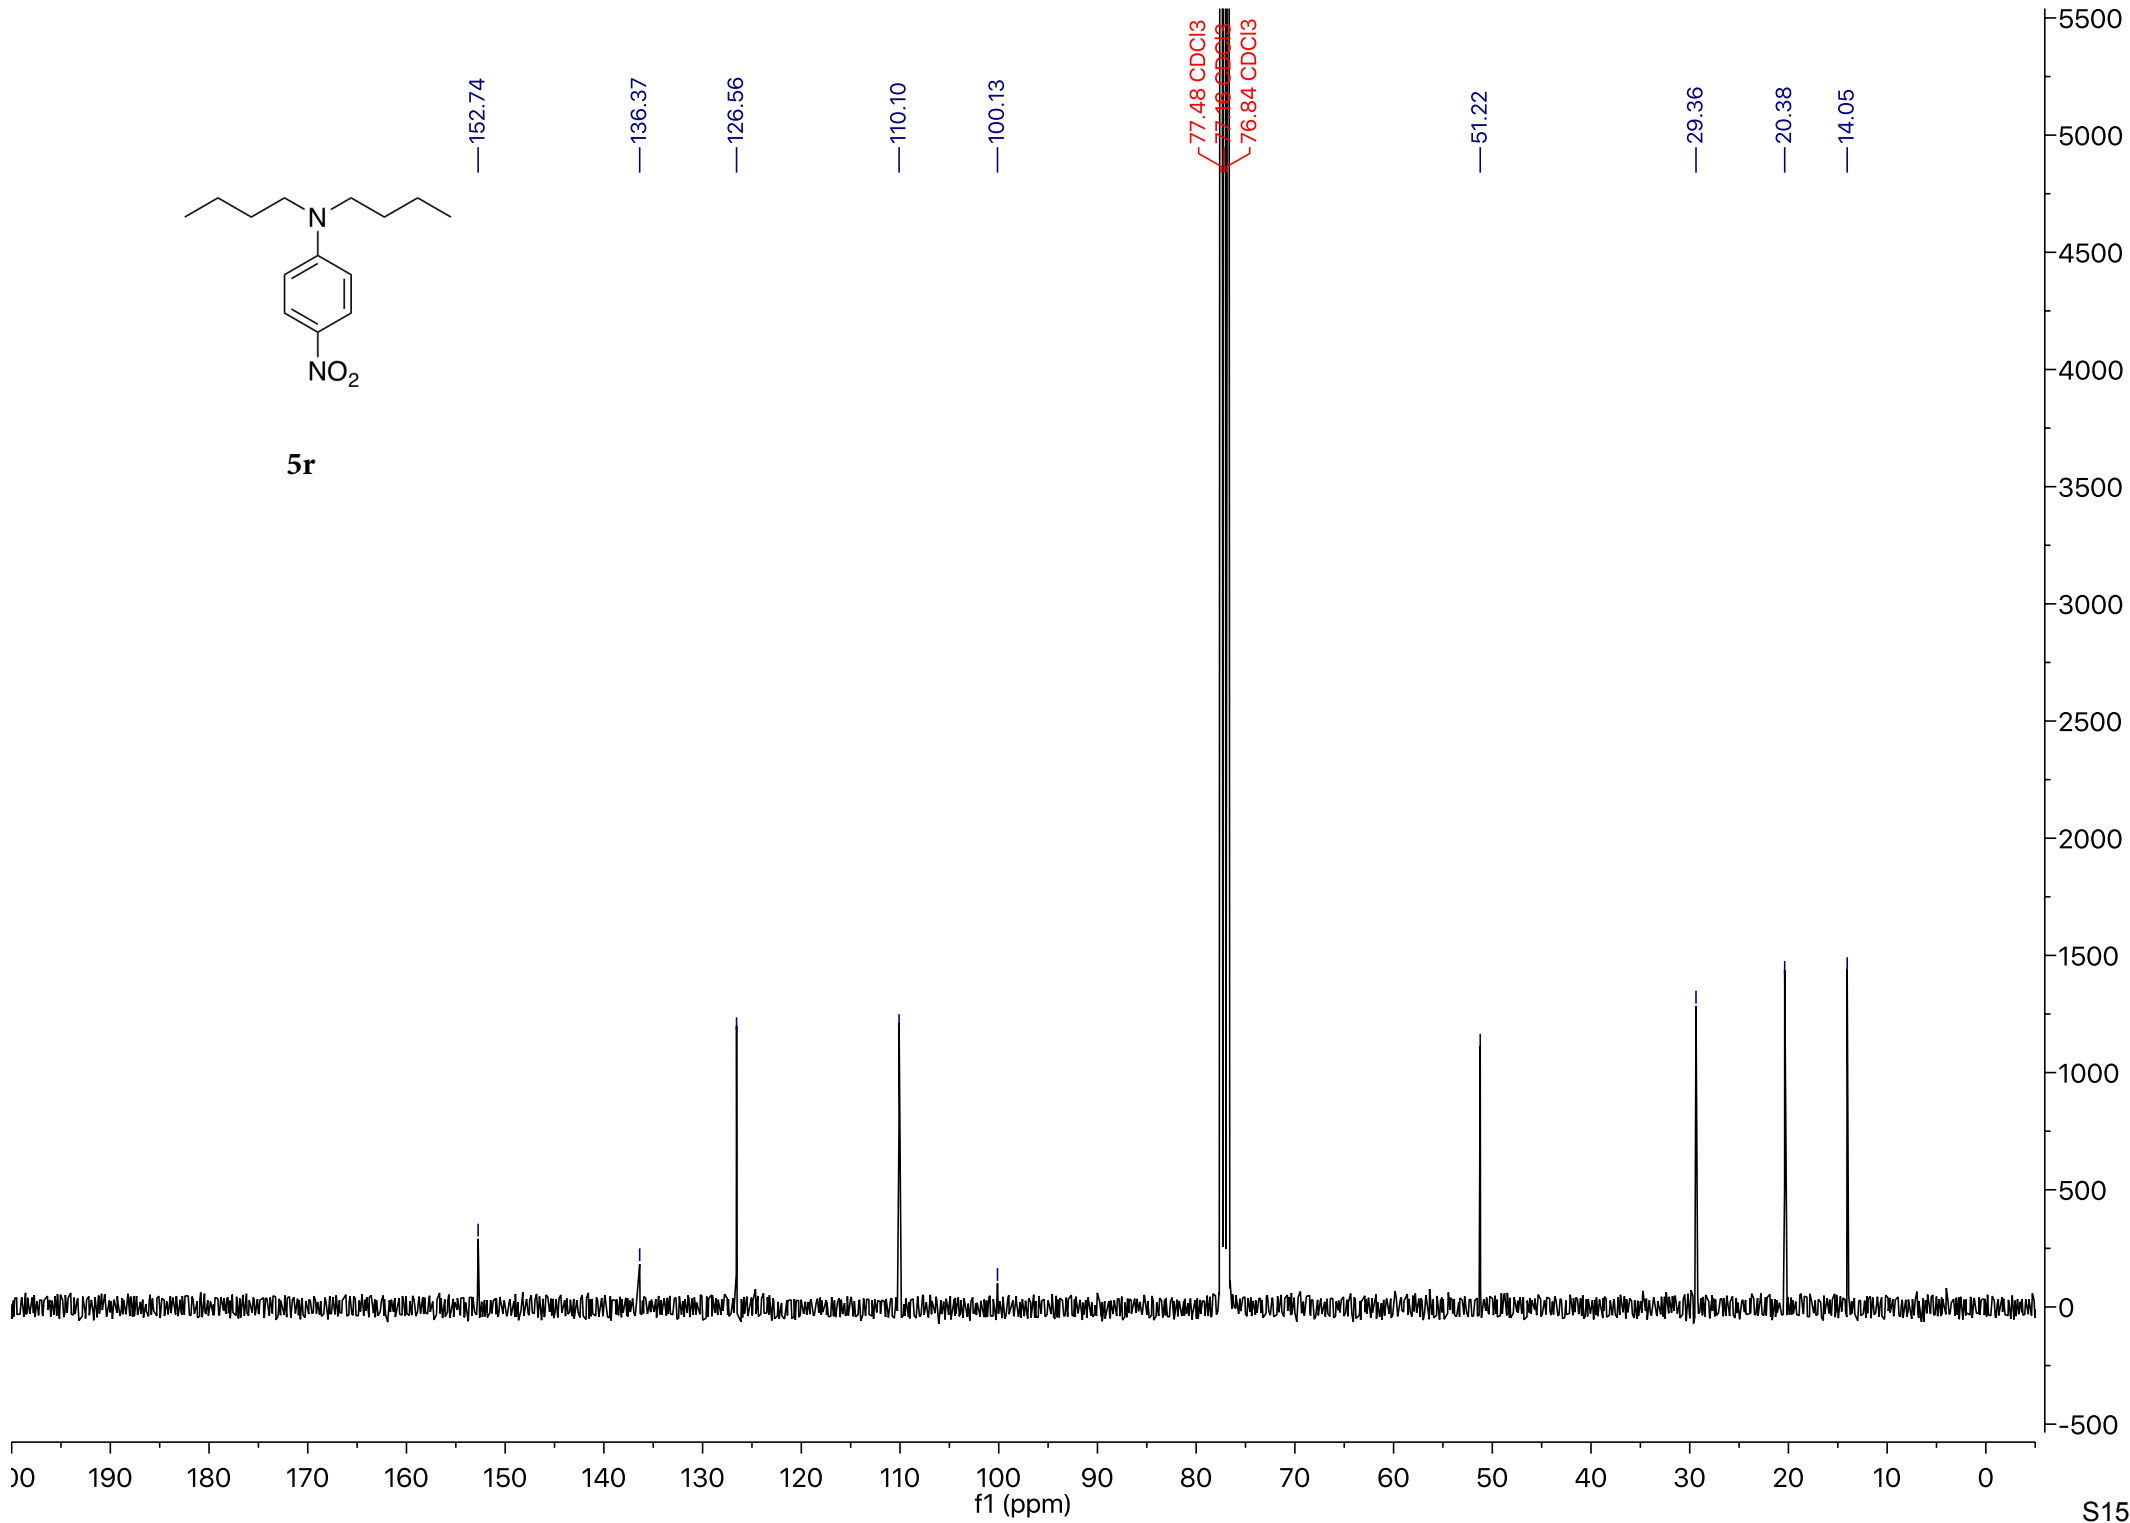

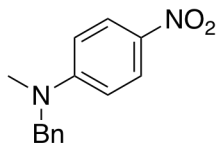

5s

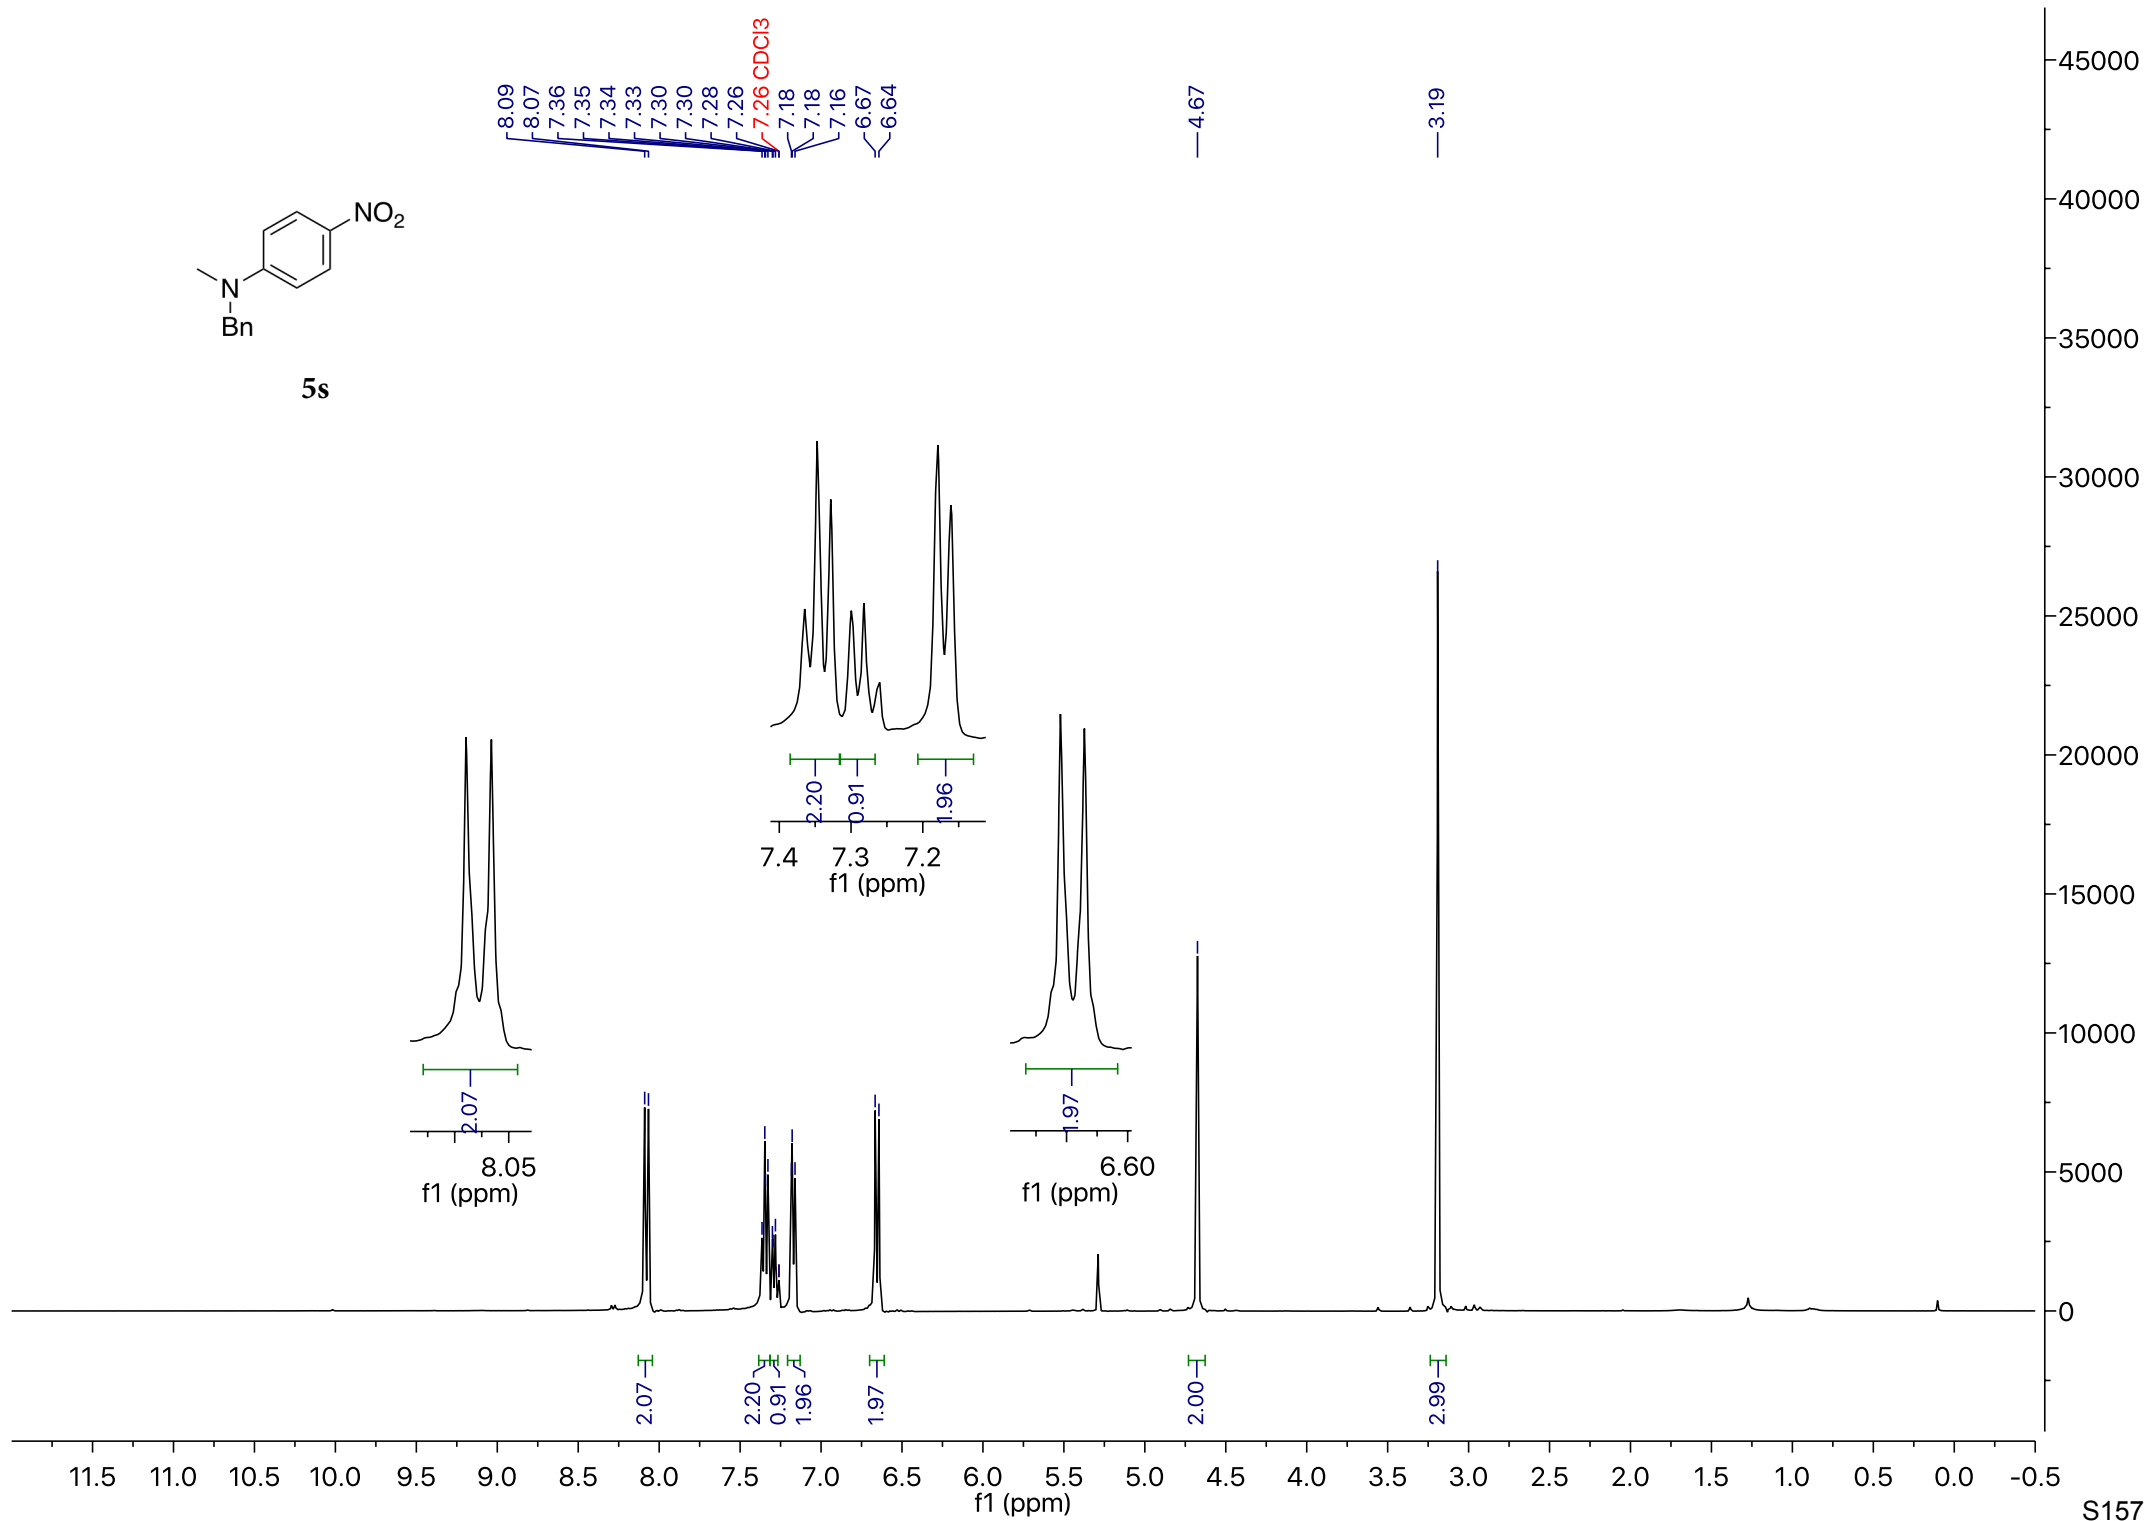

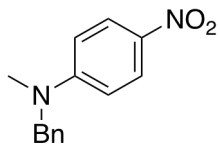

5s

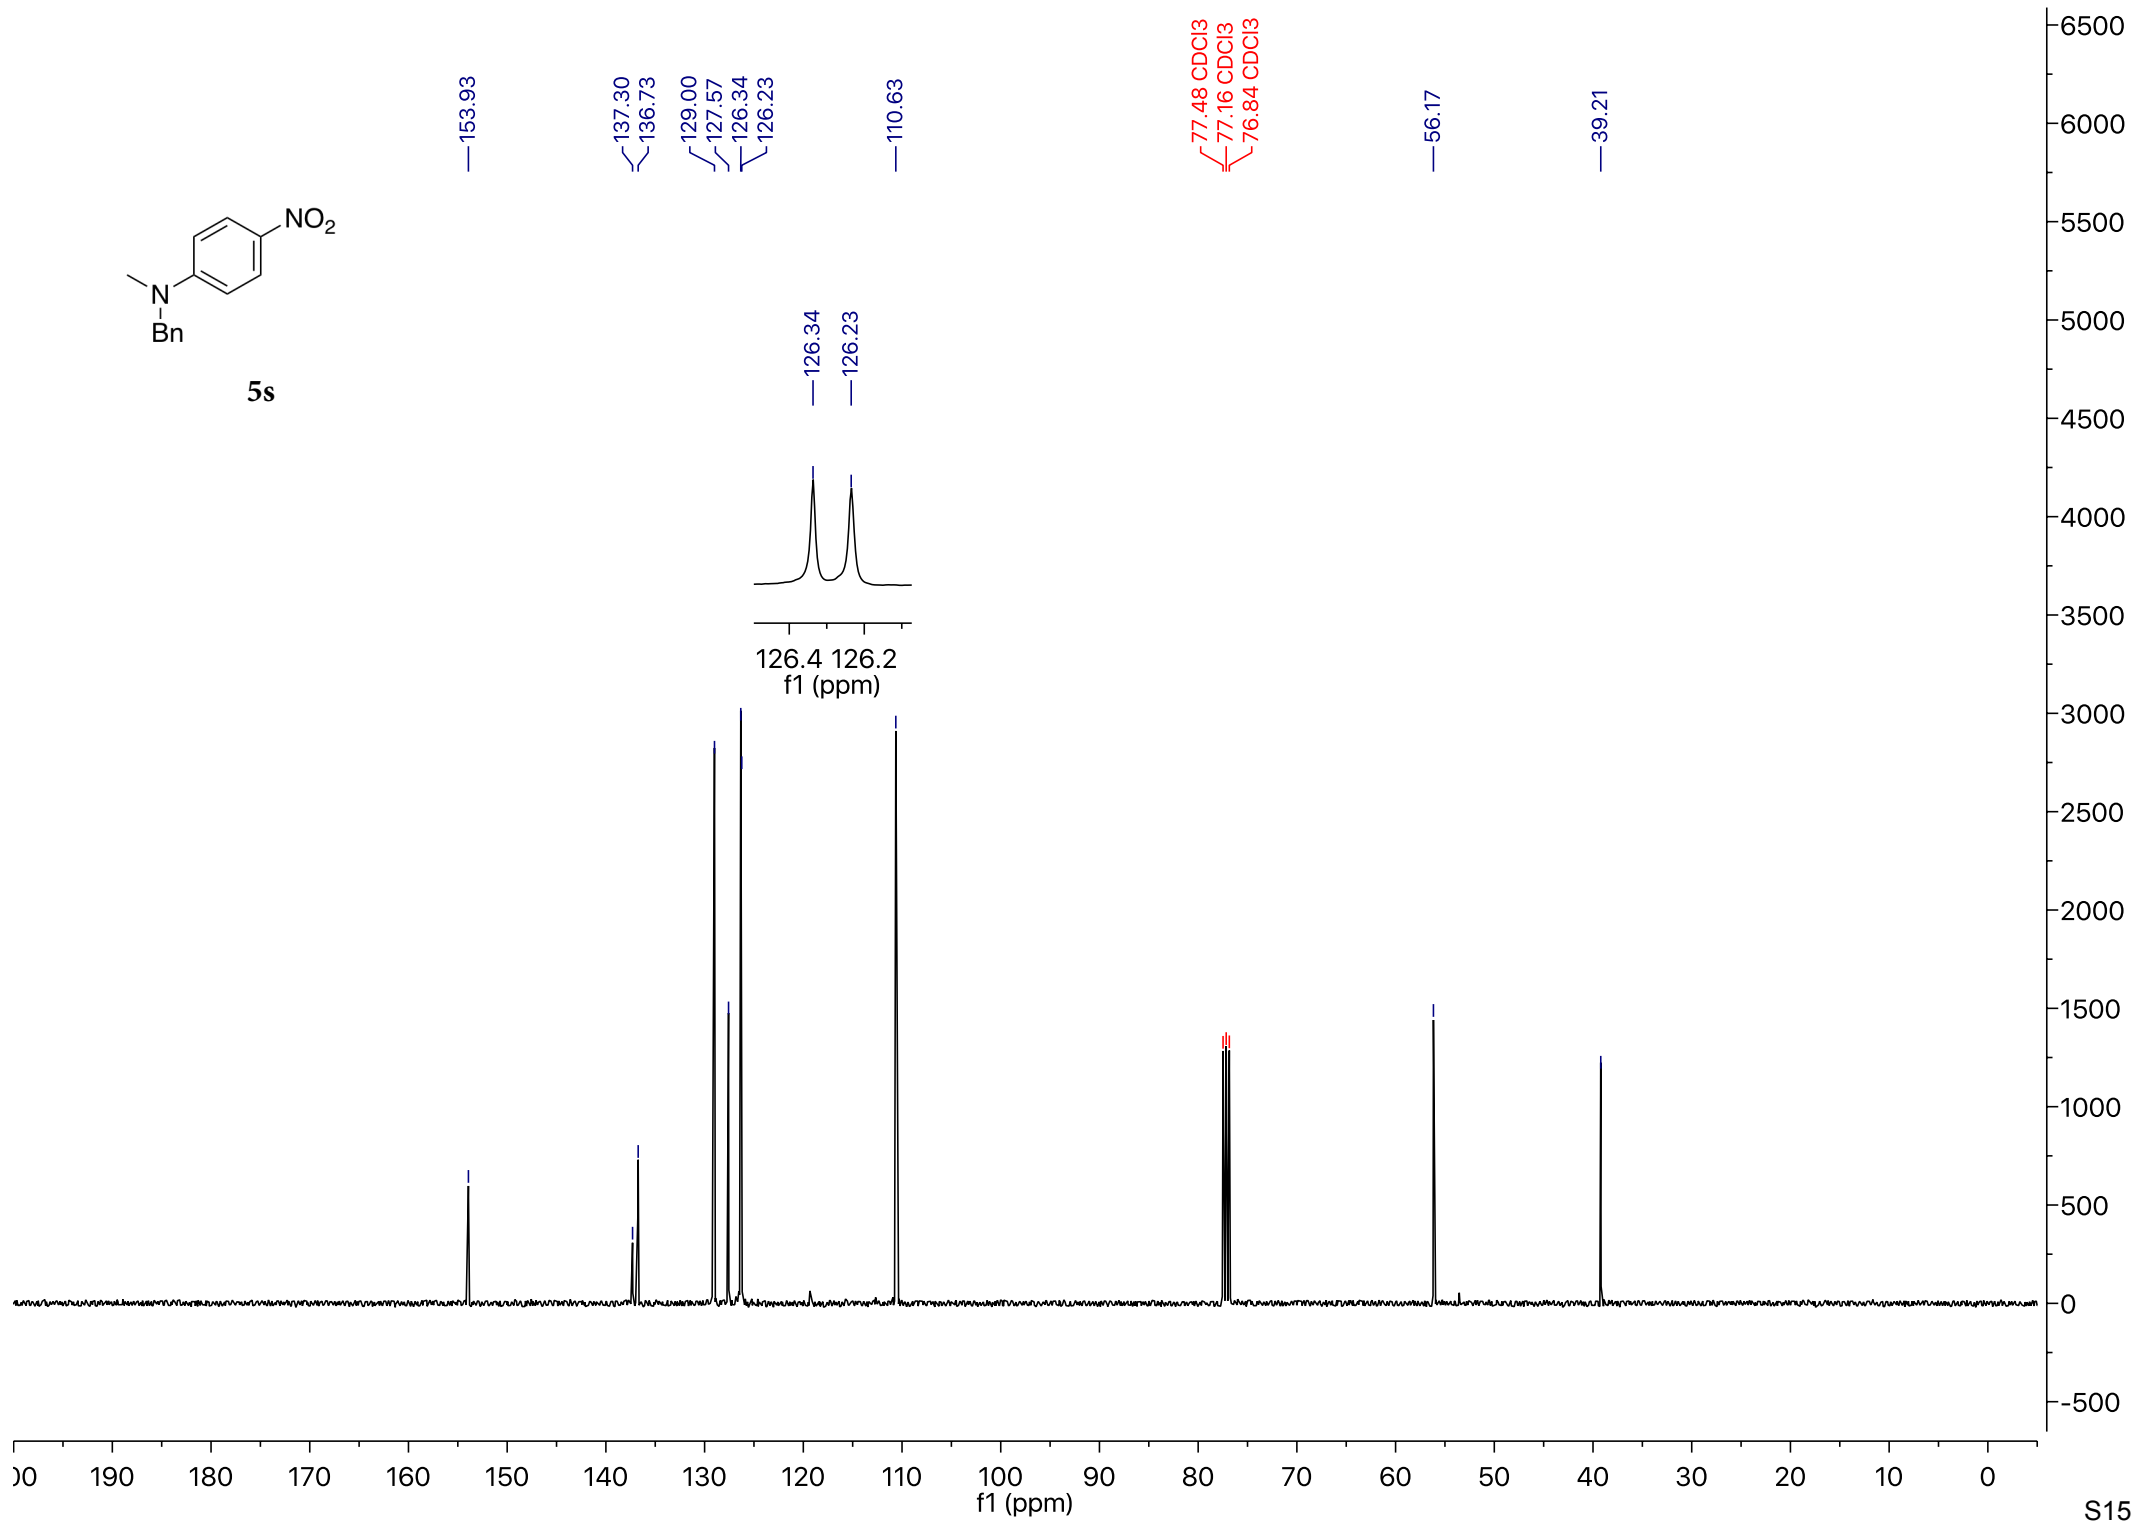

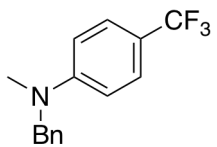

5t

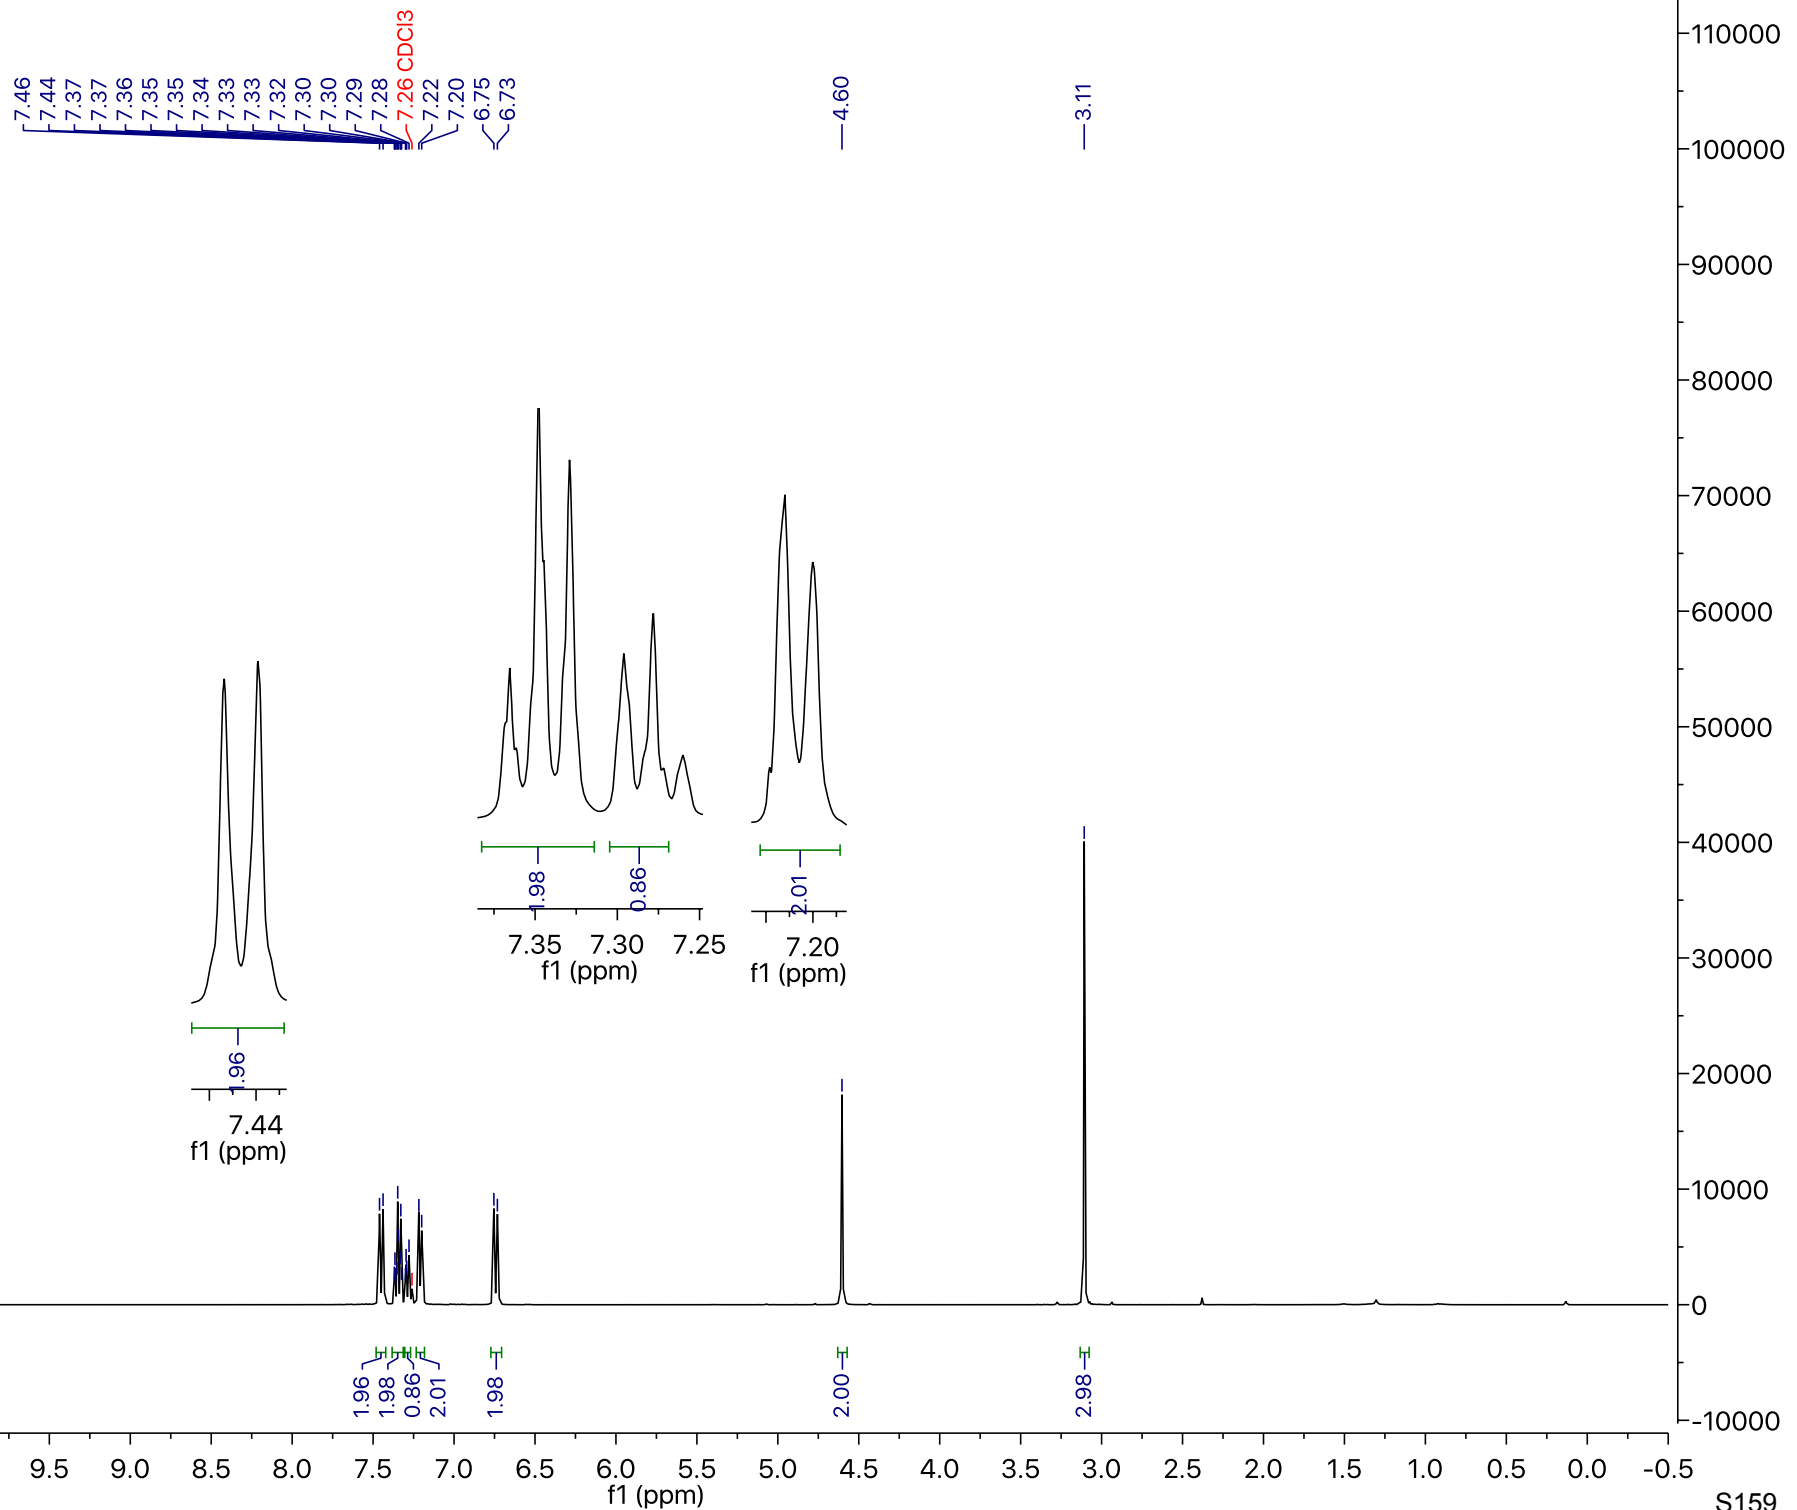

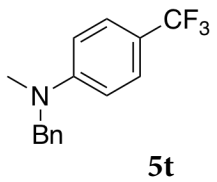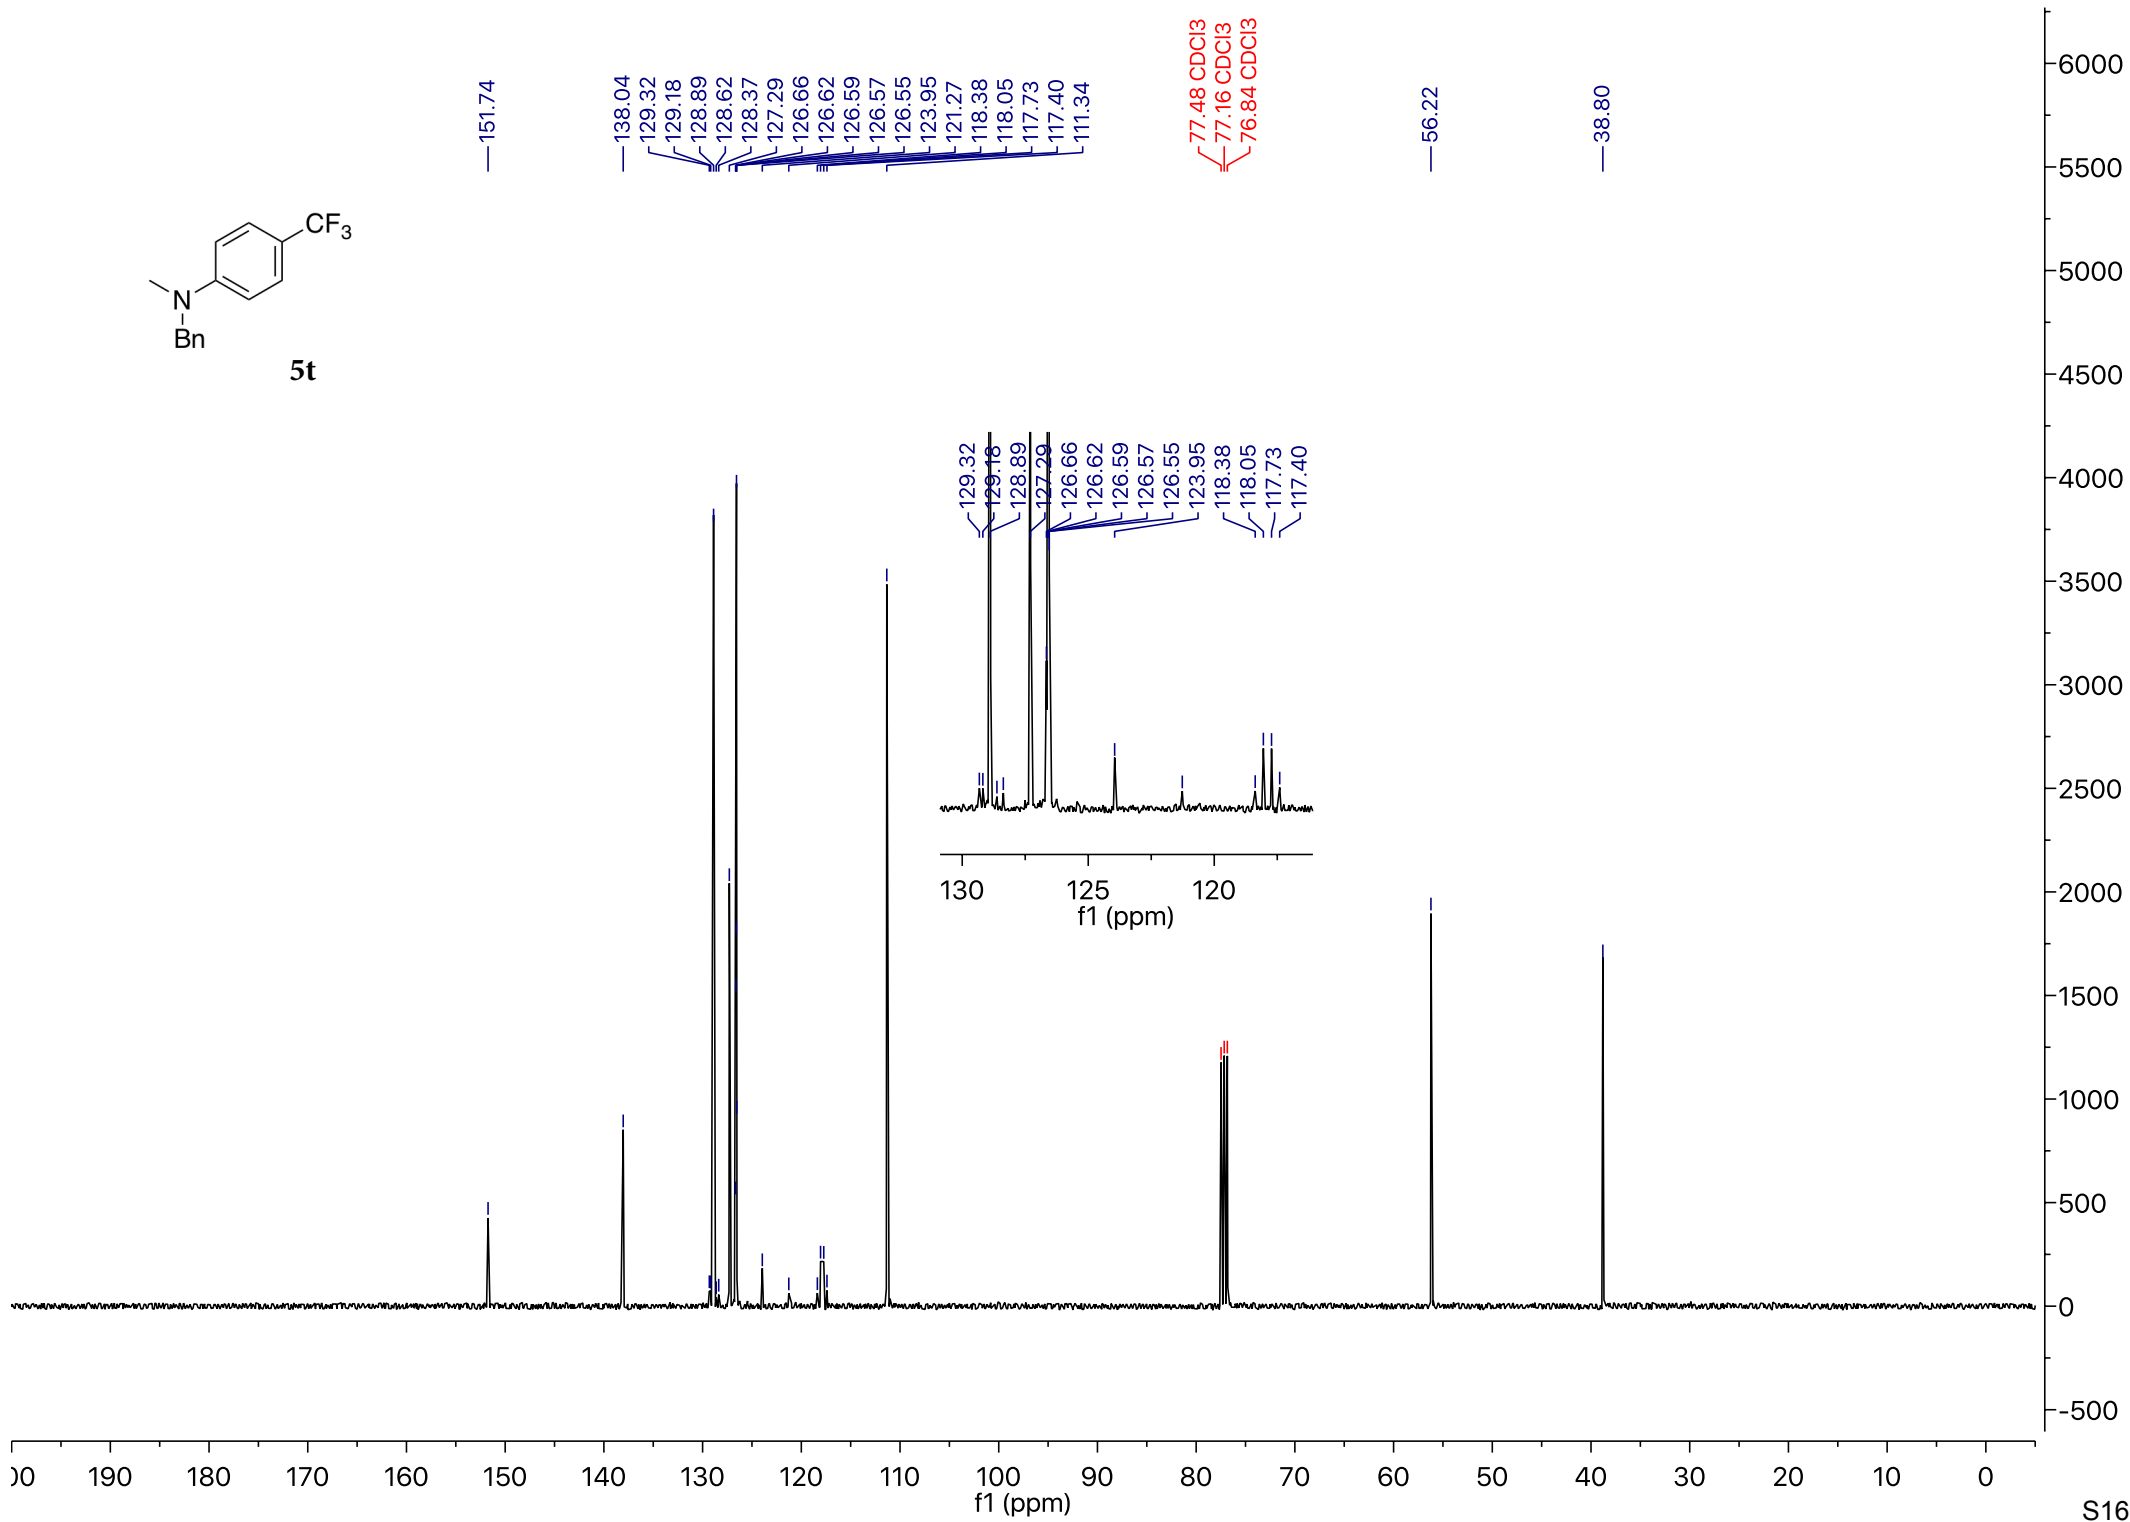

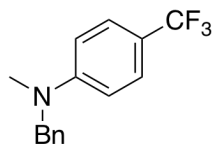

5t

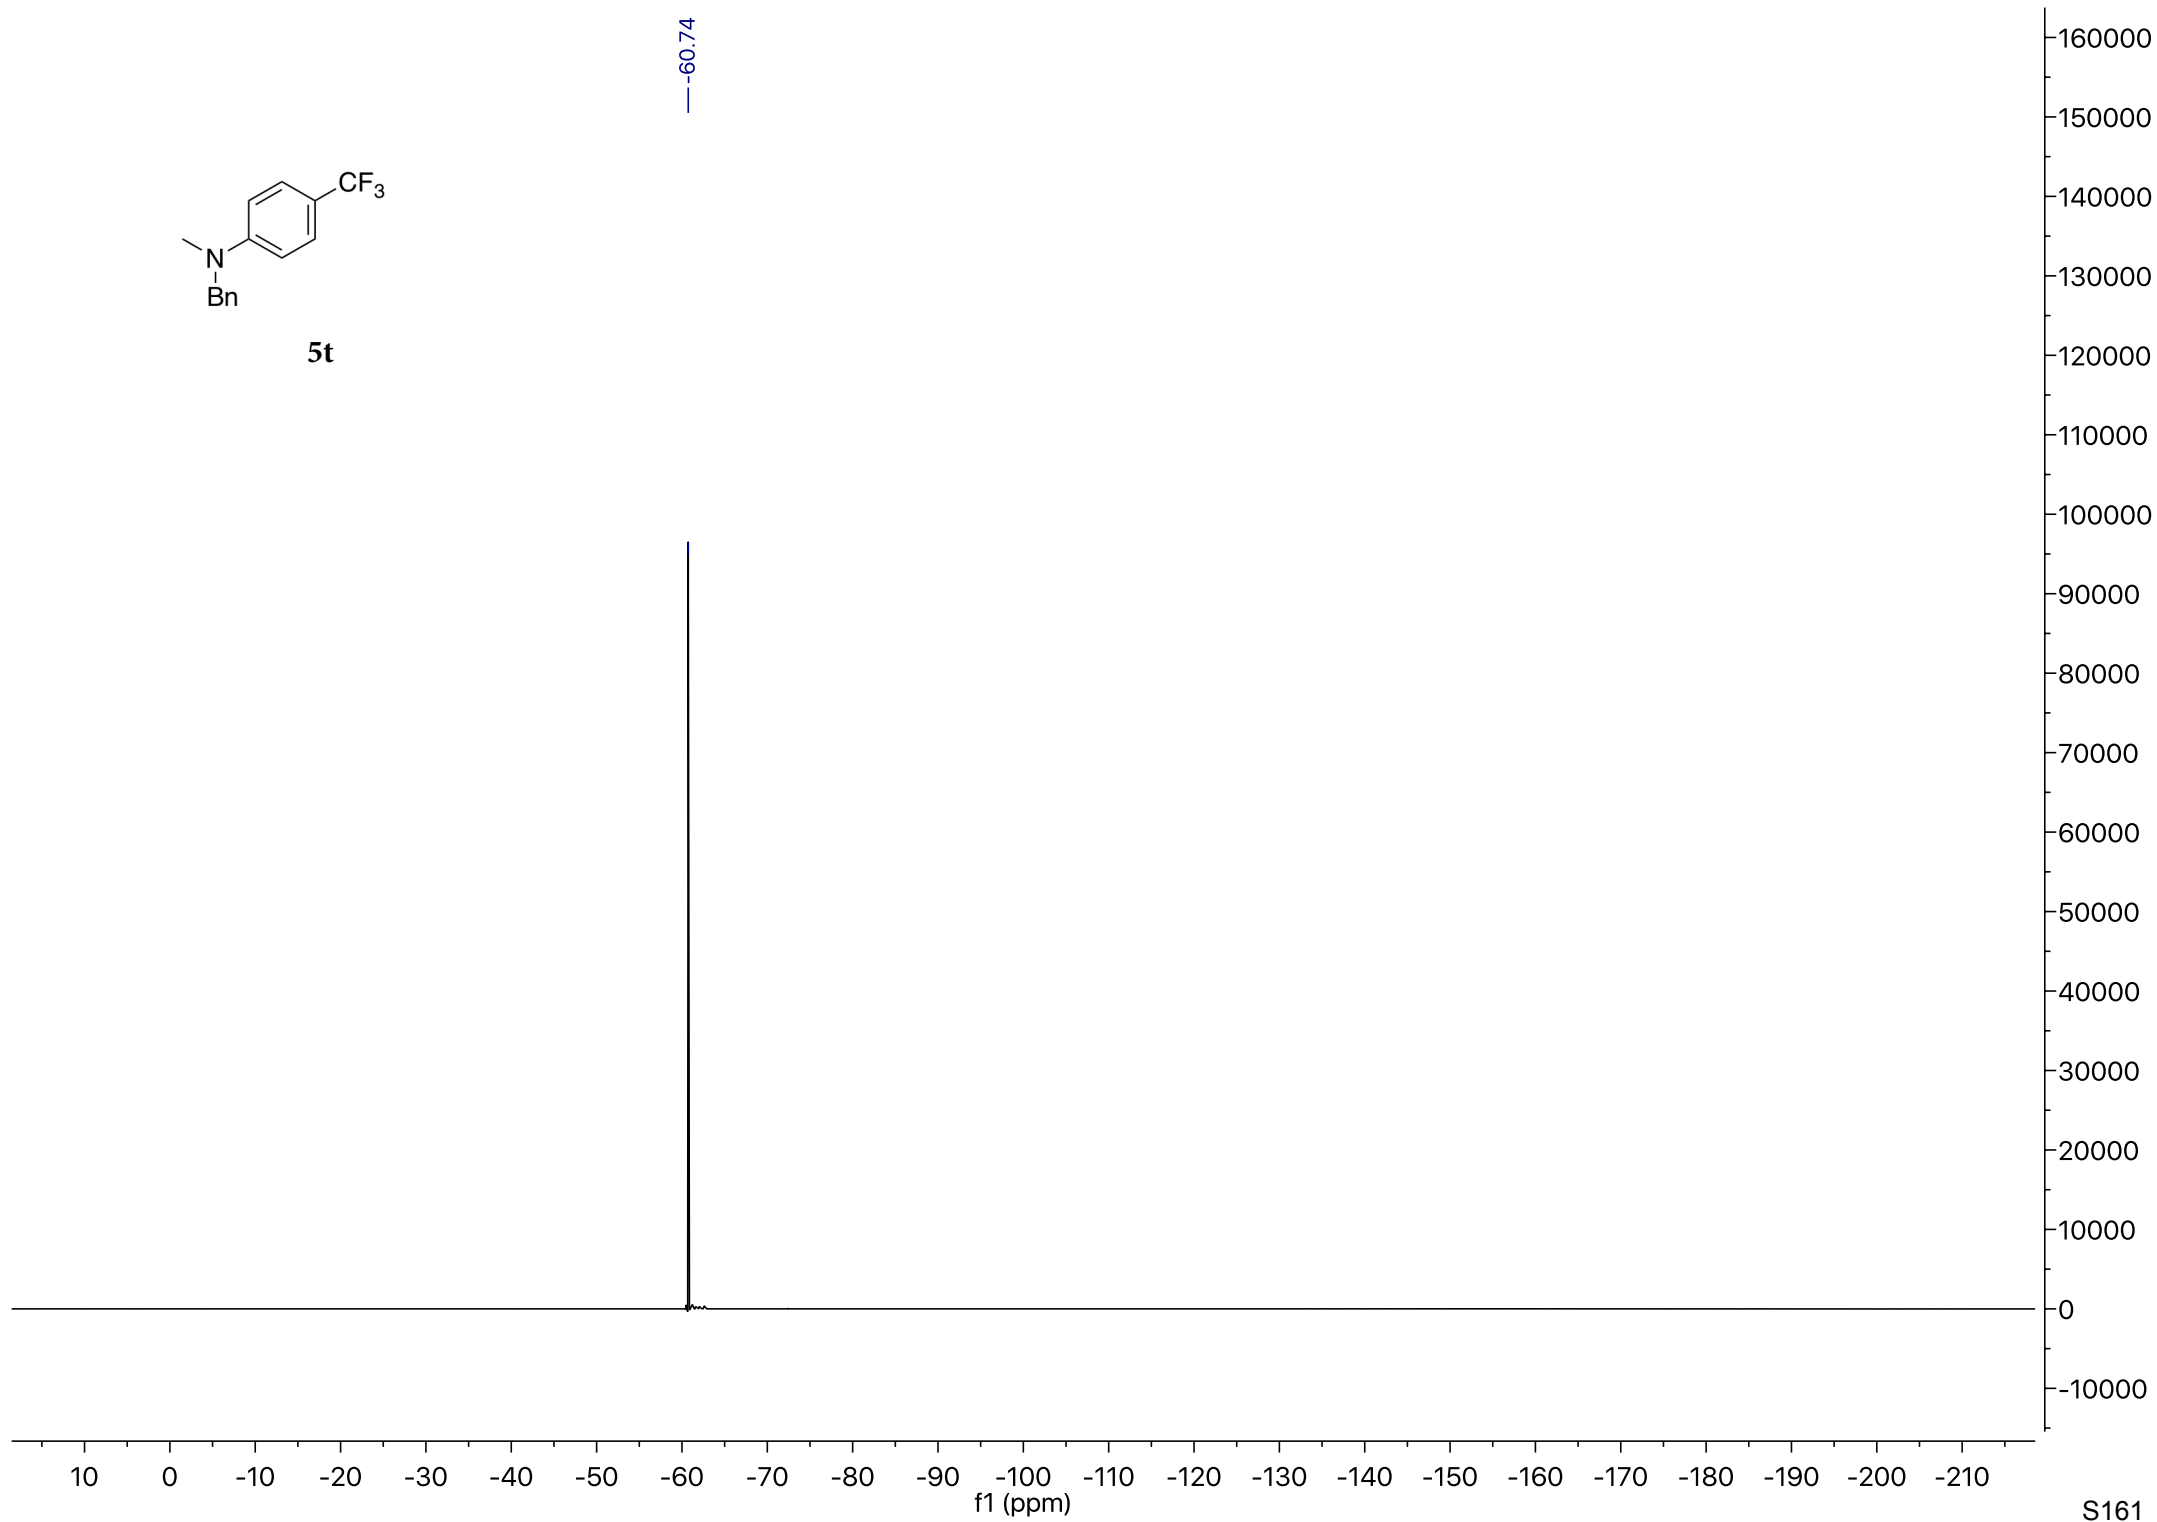

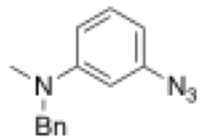

5u

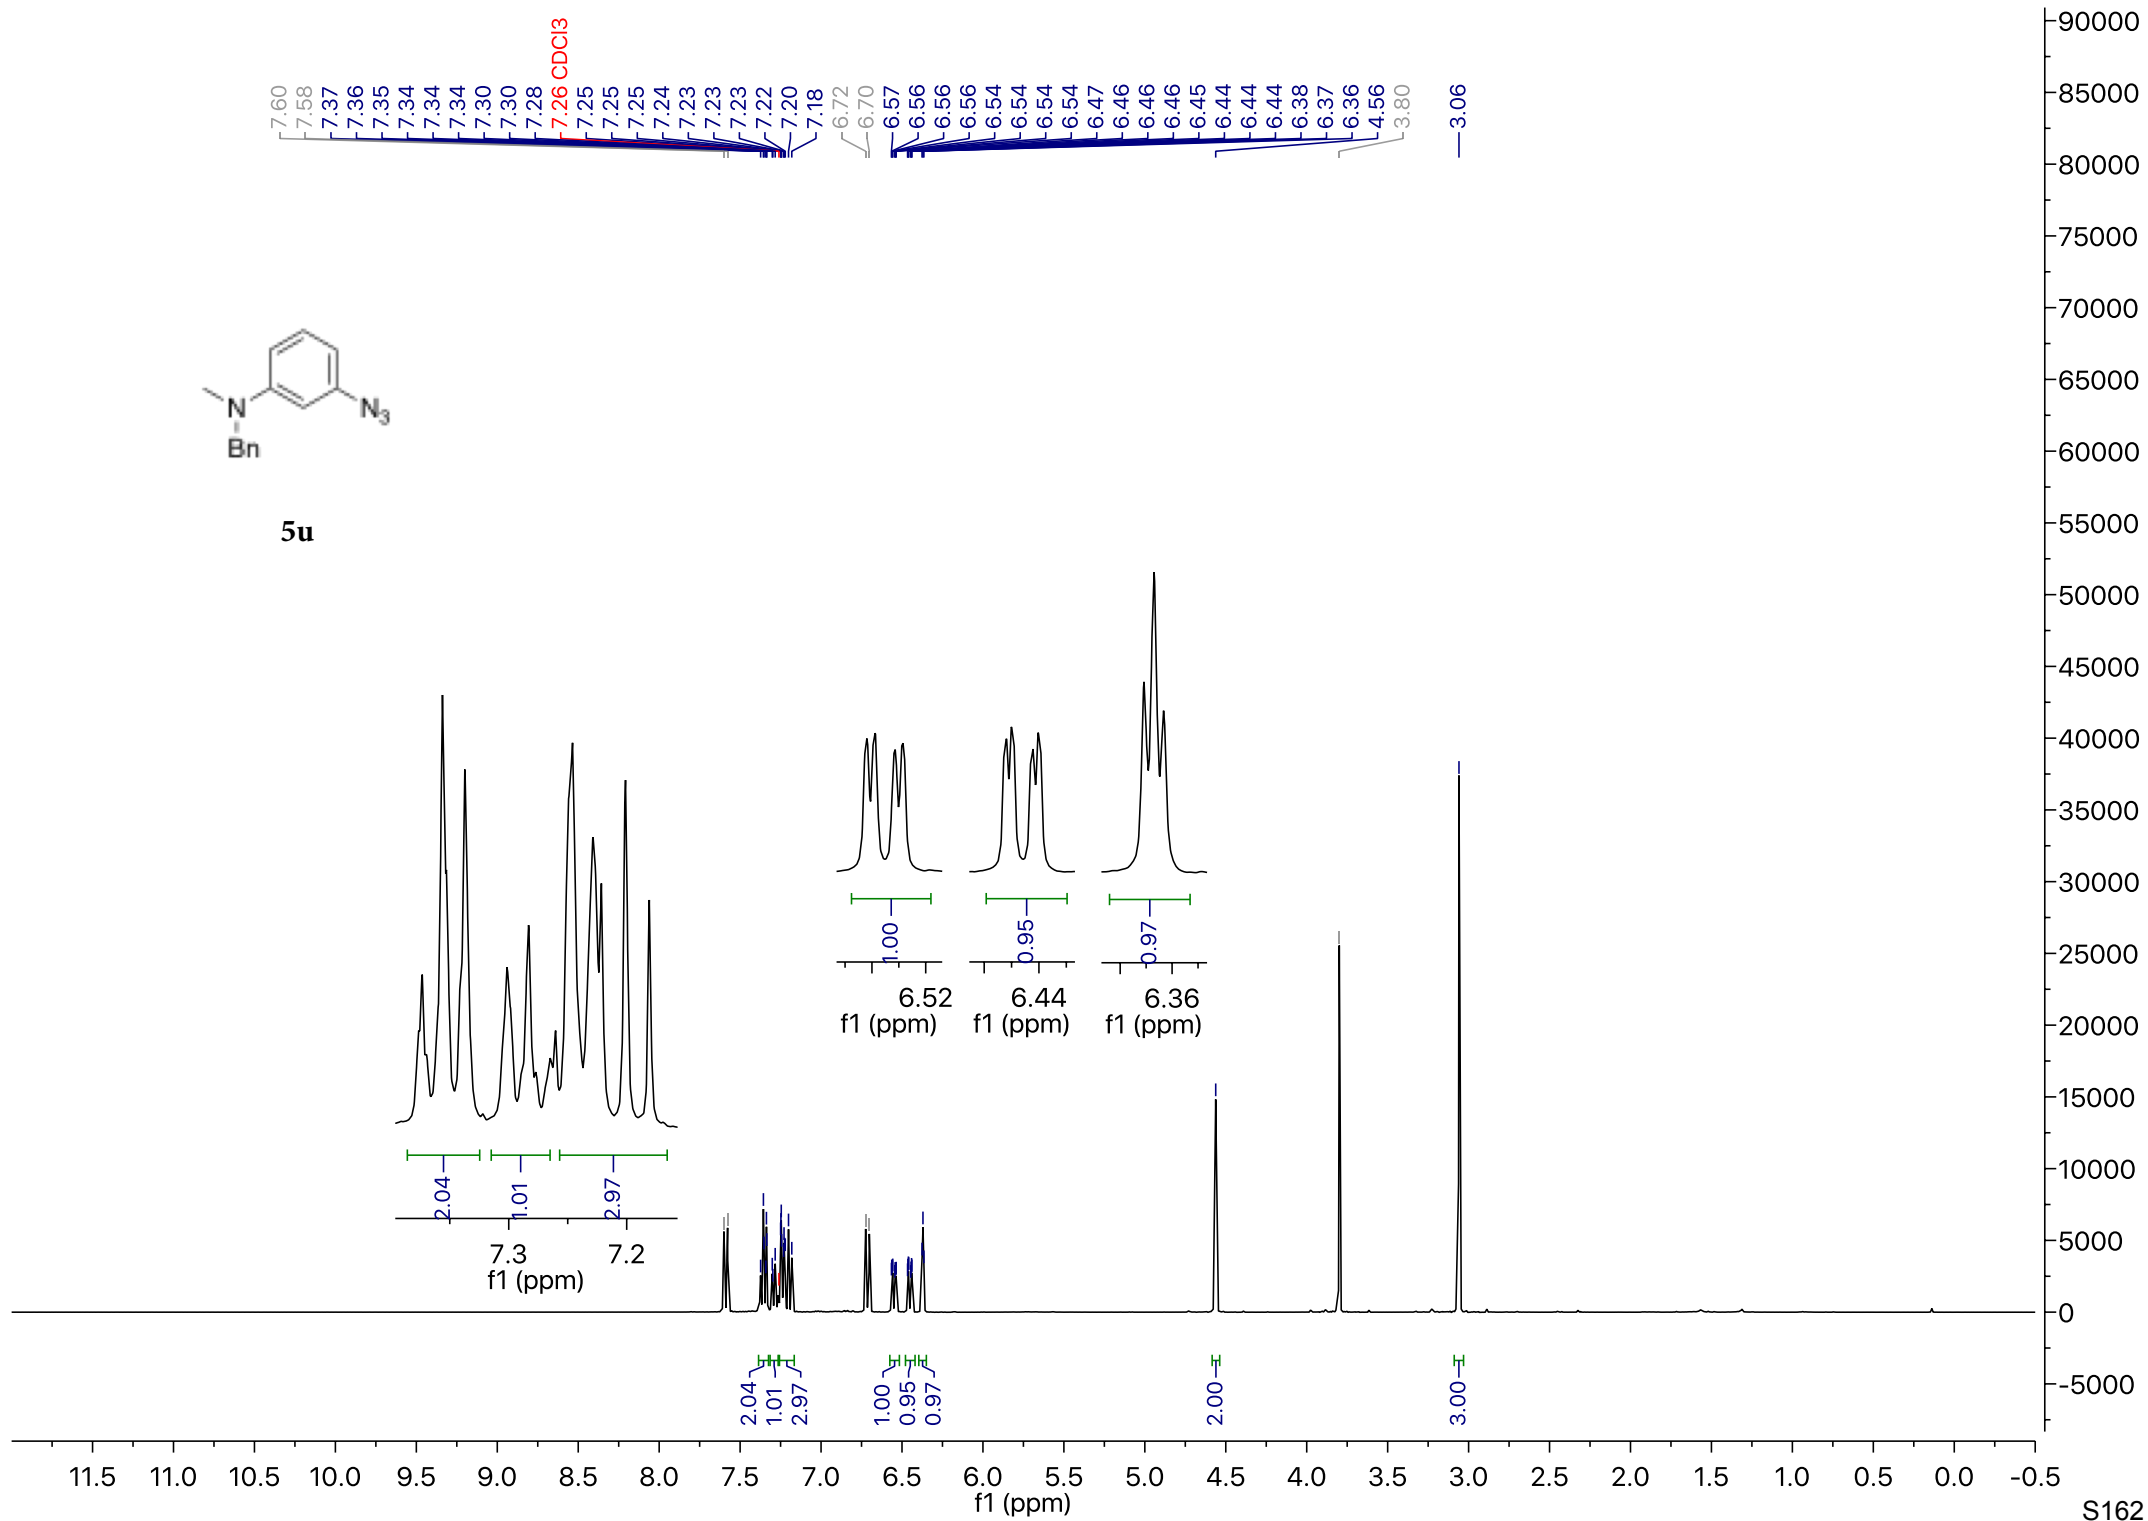

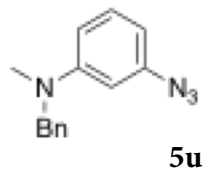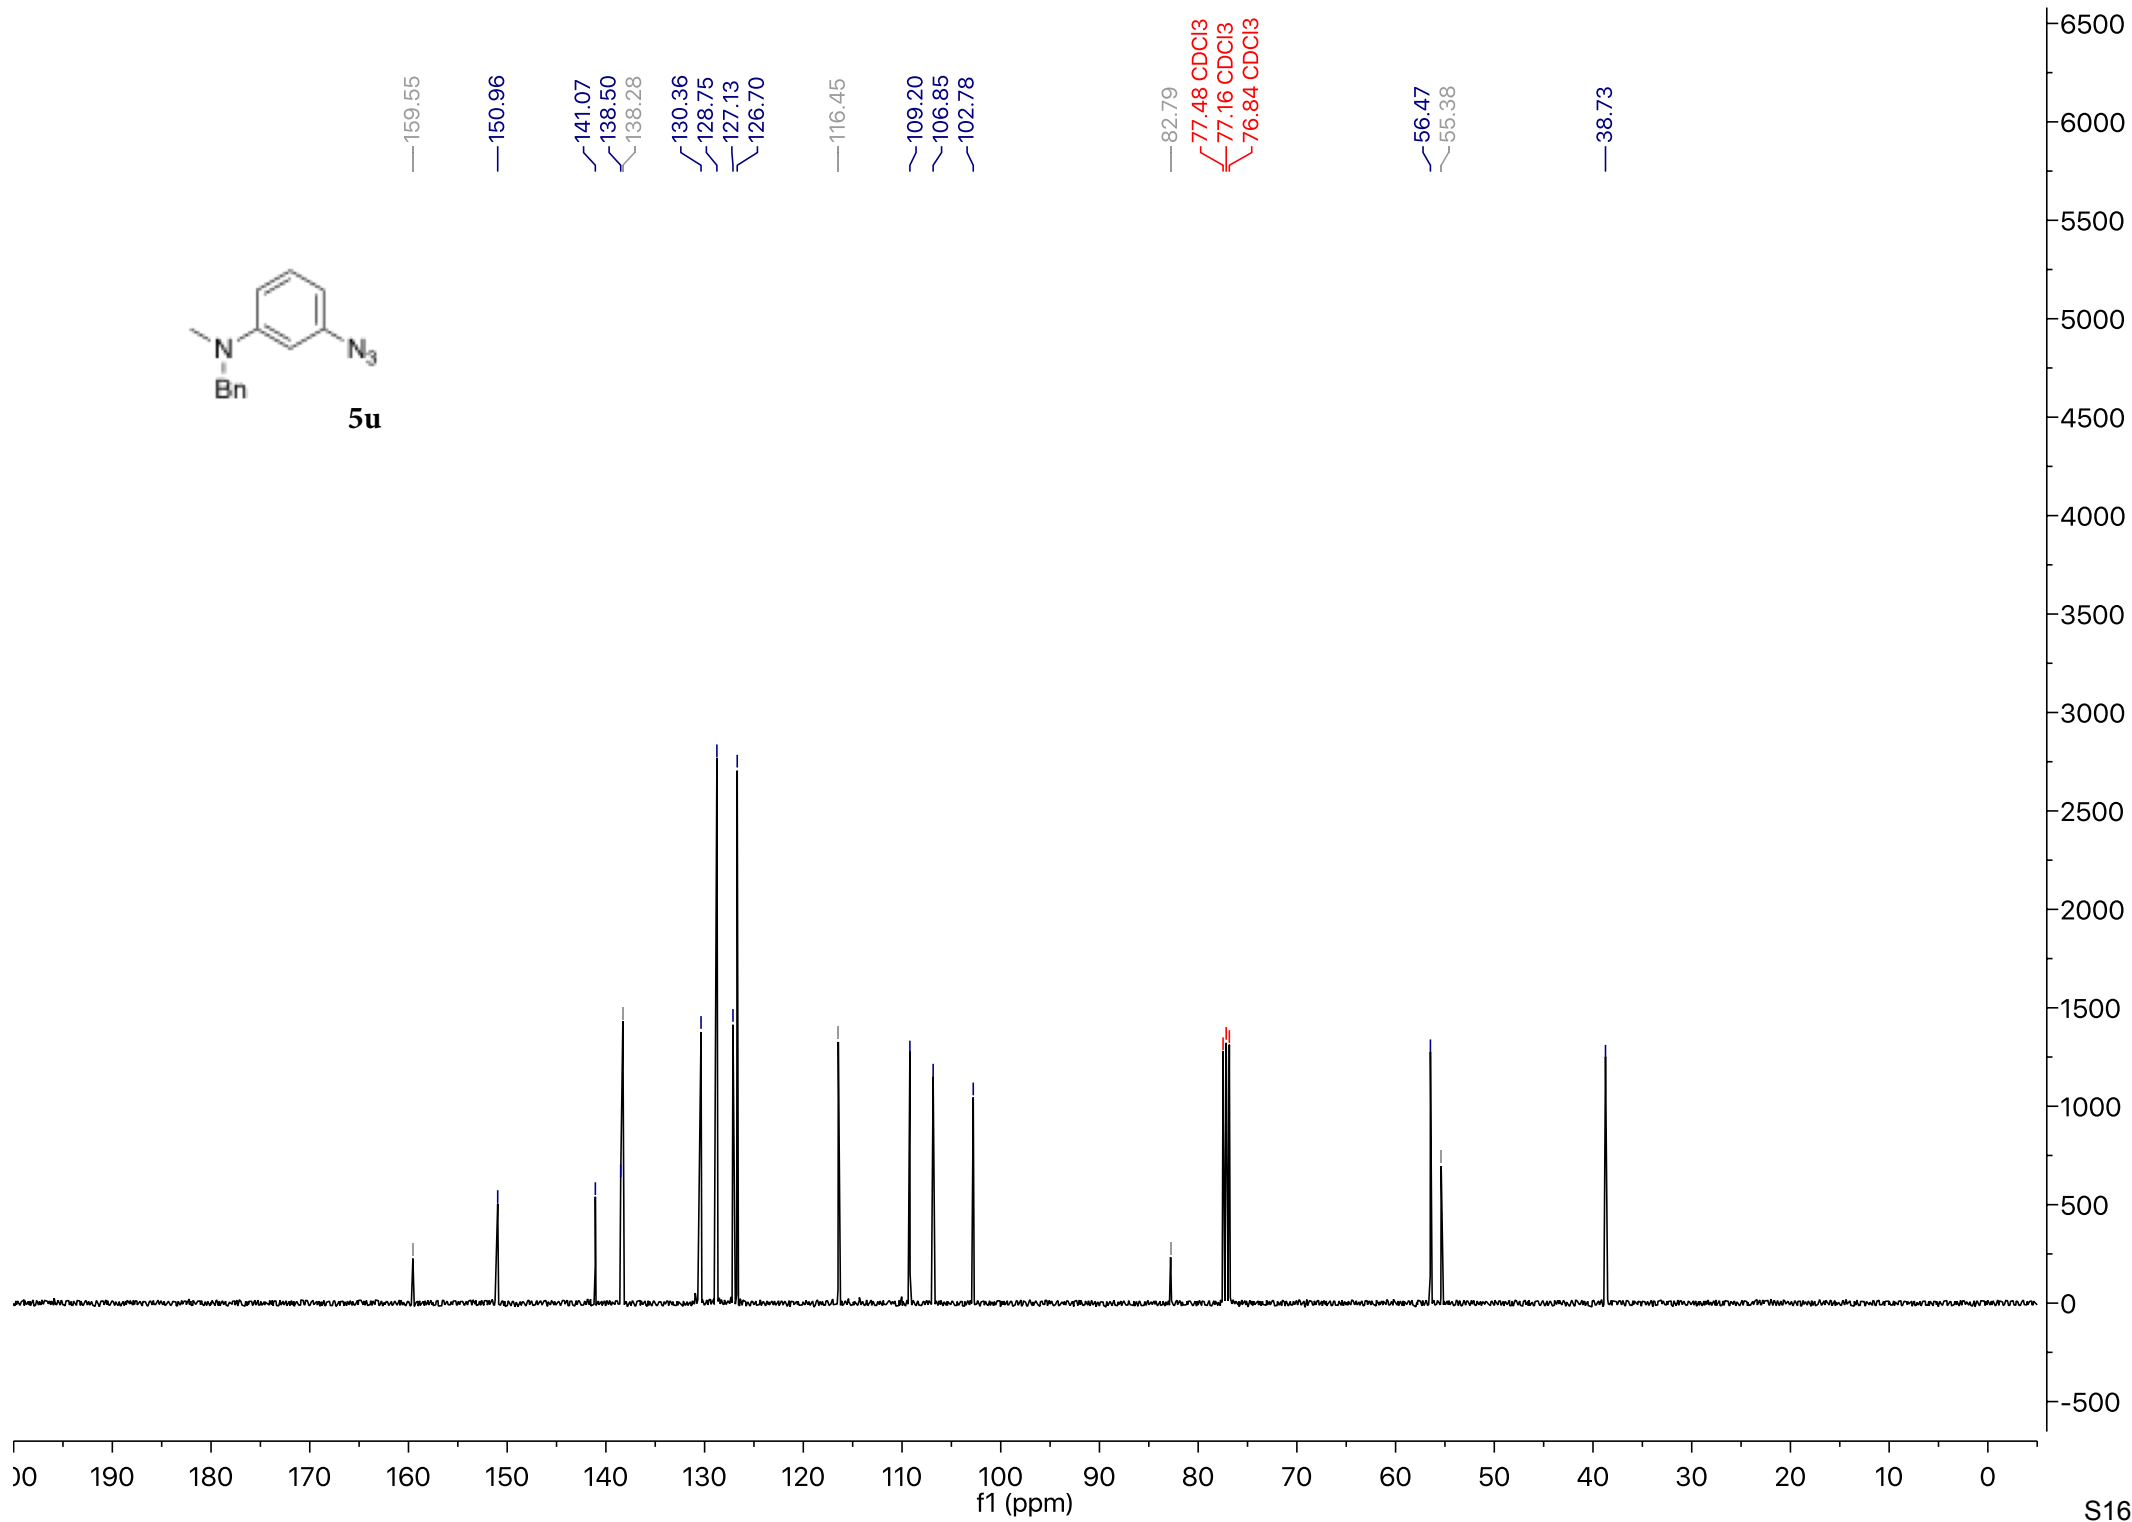



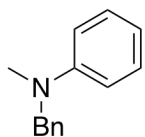

5v

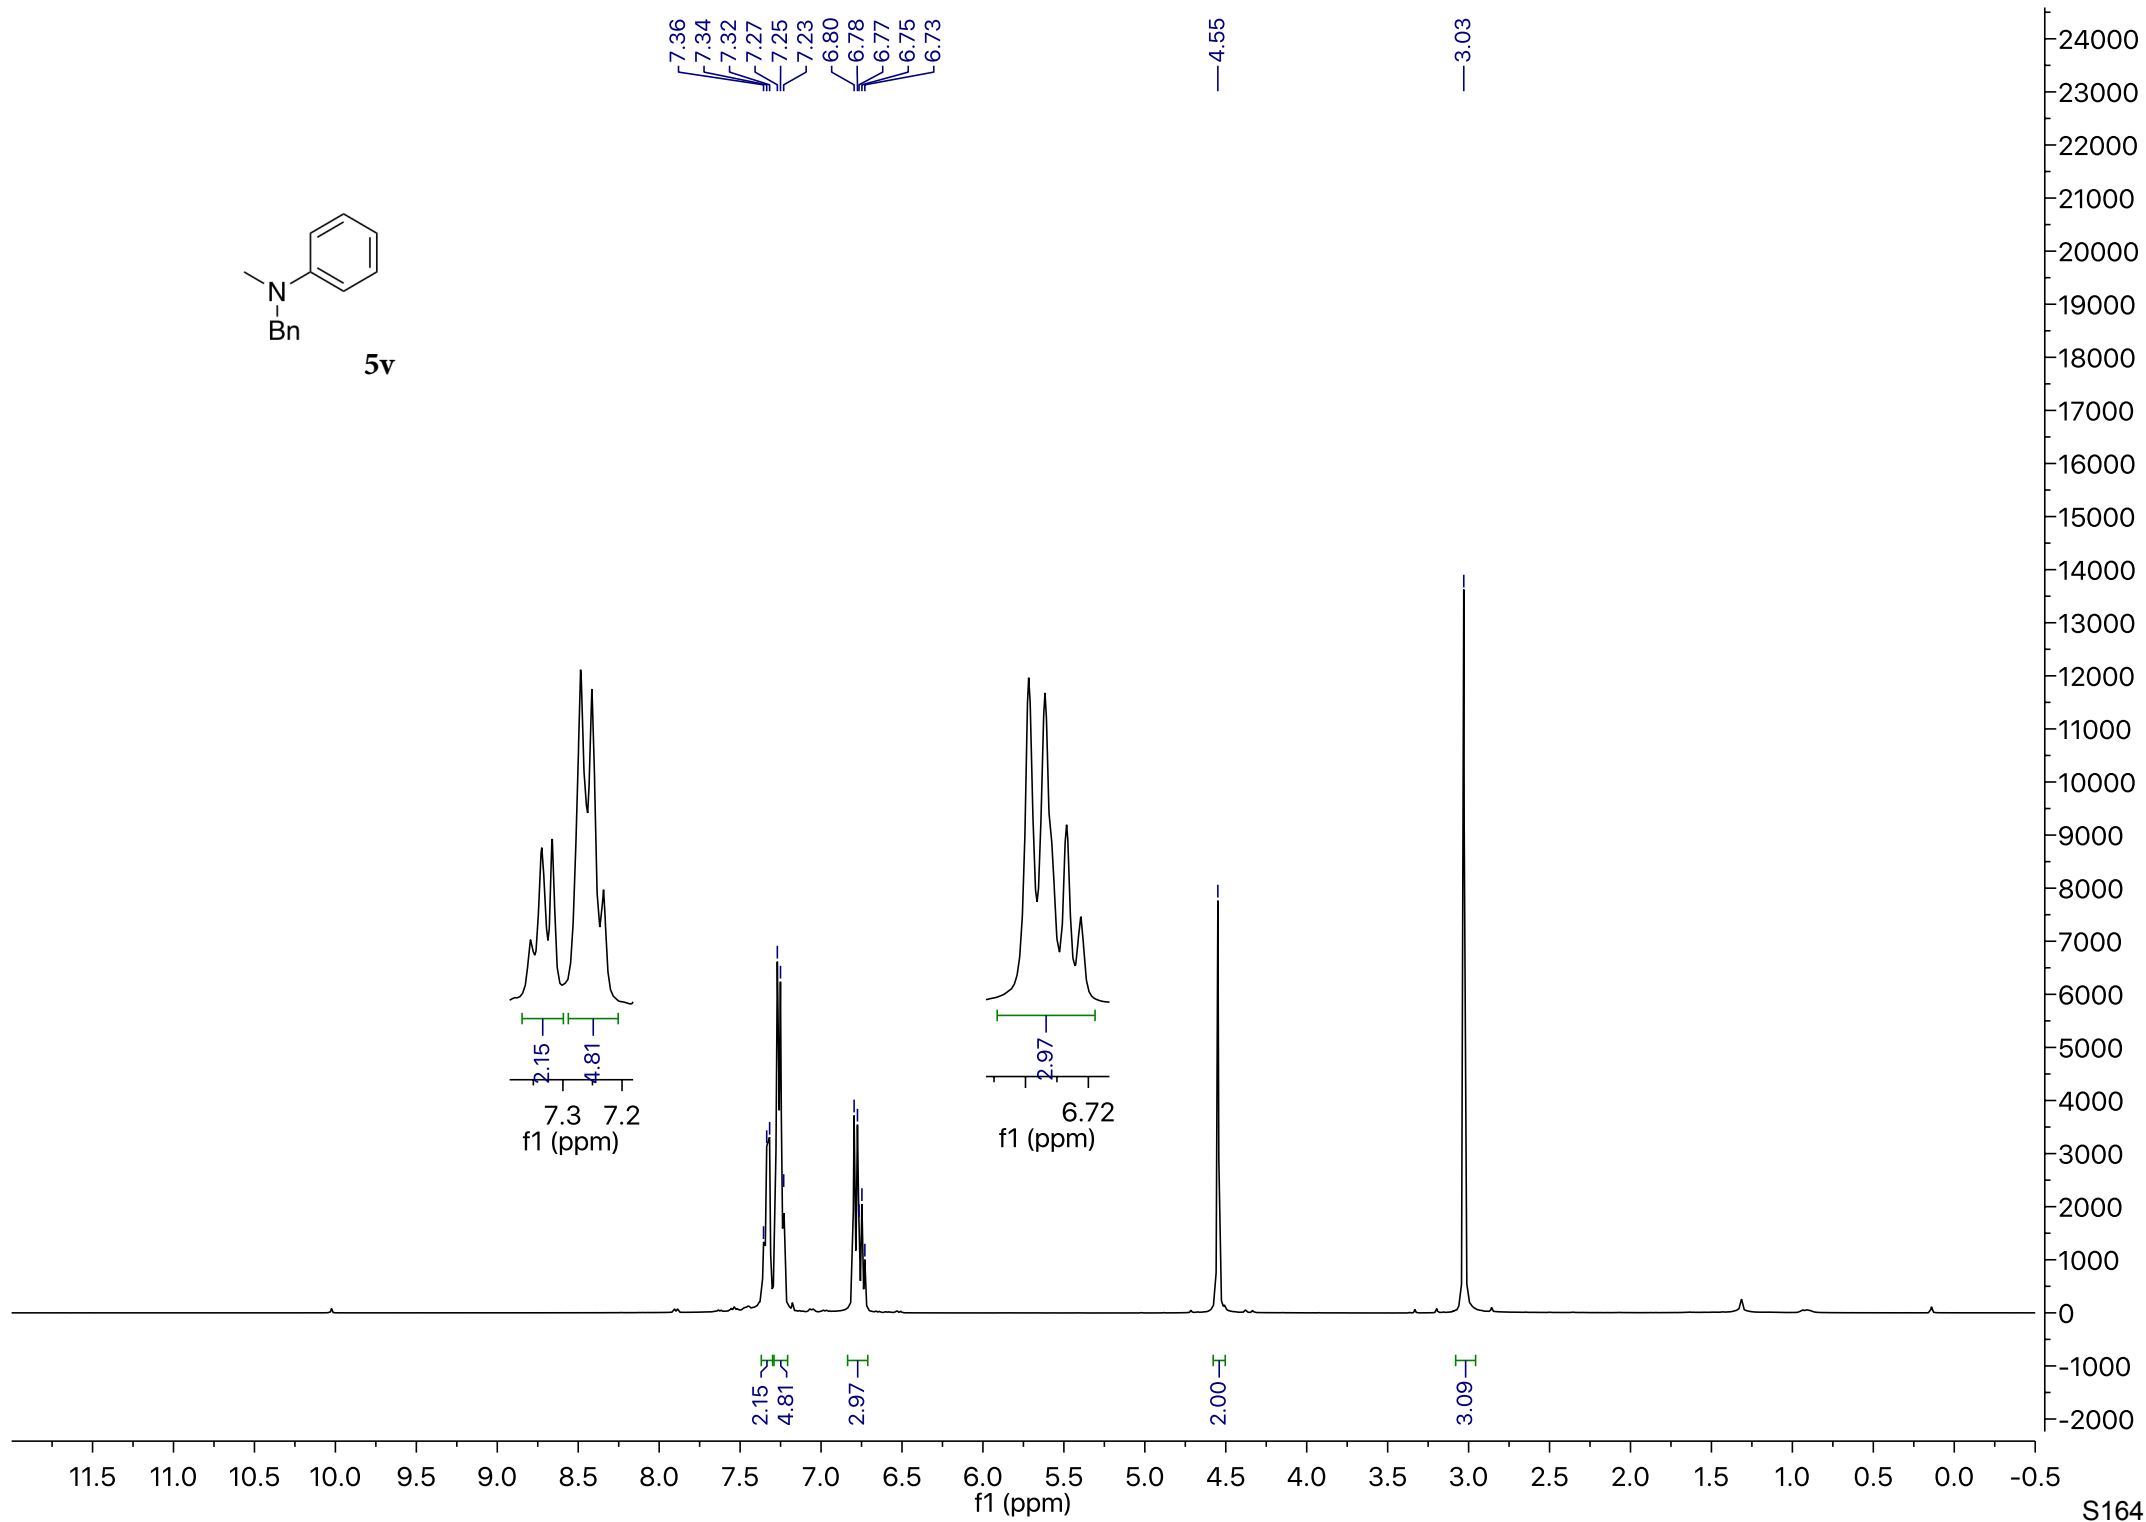

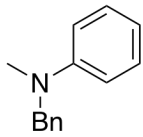

5v

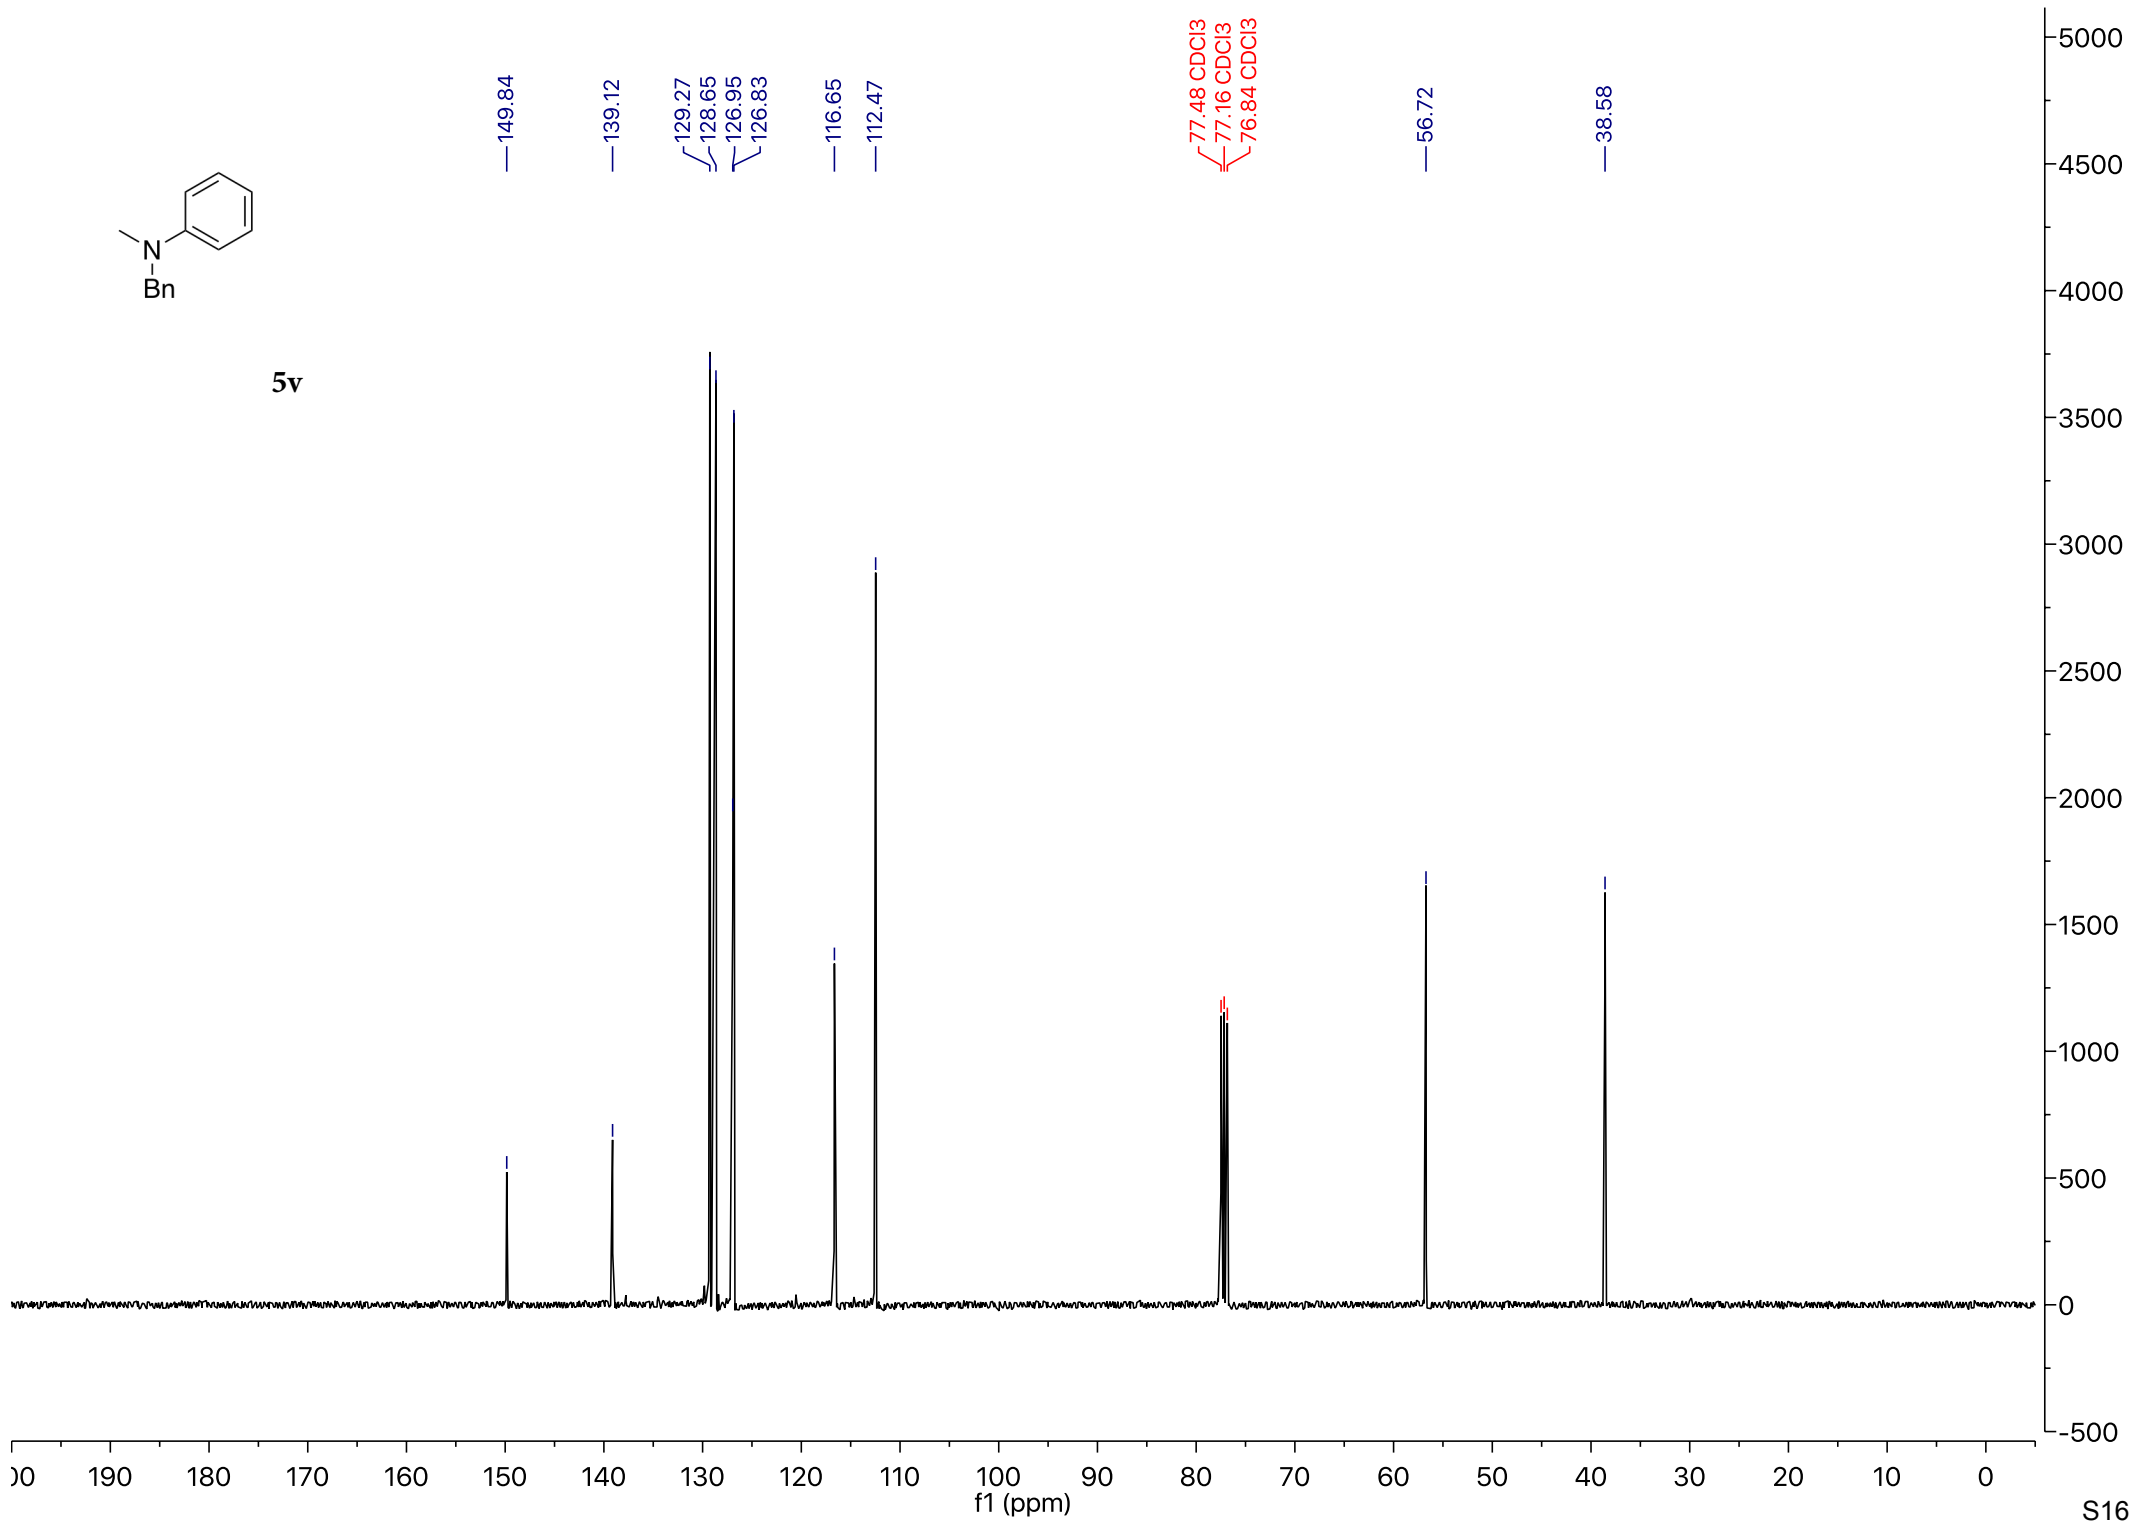

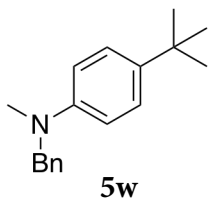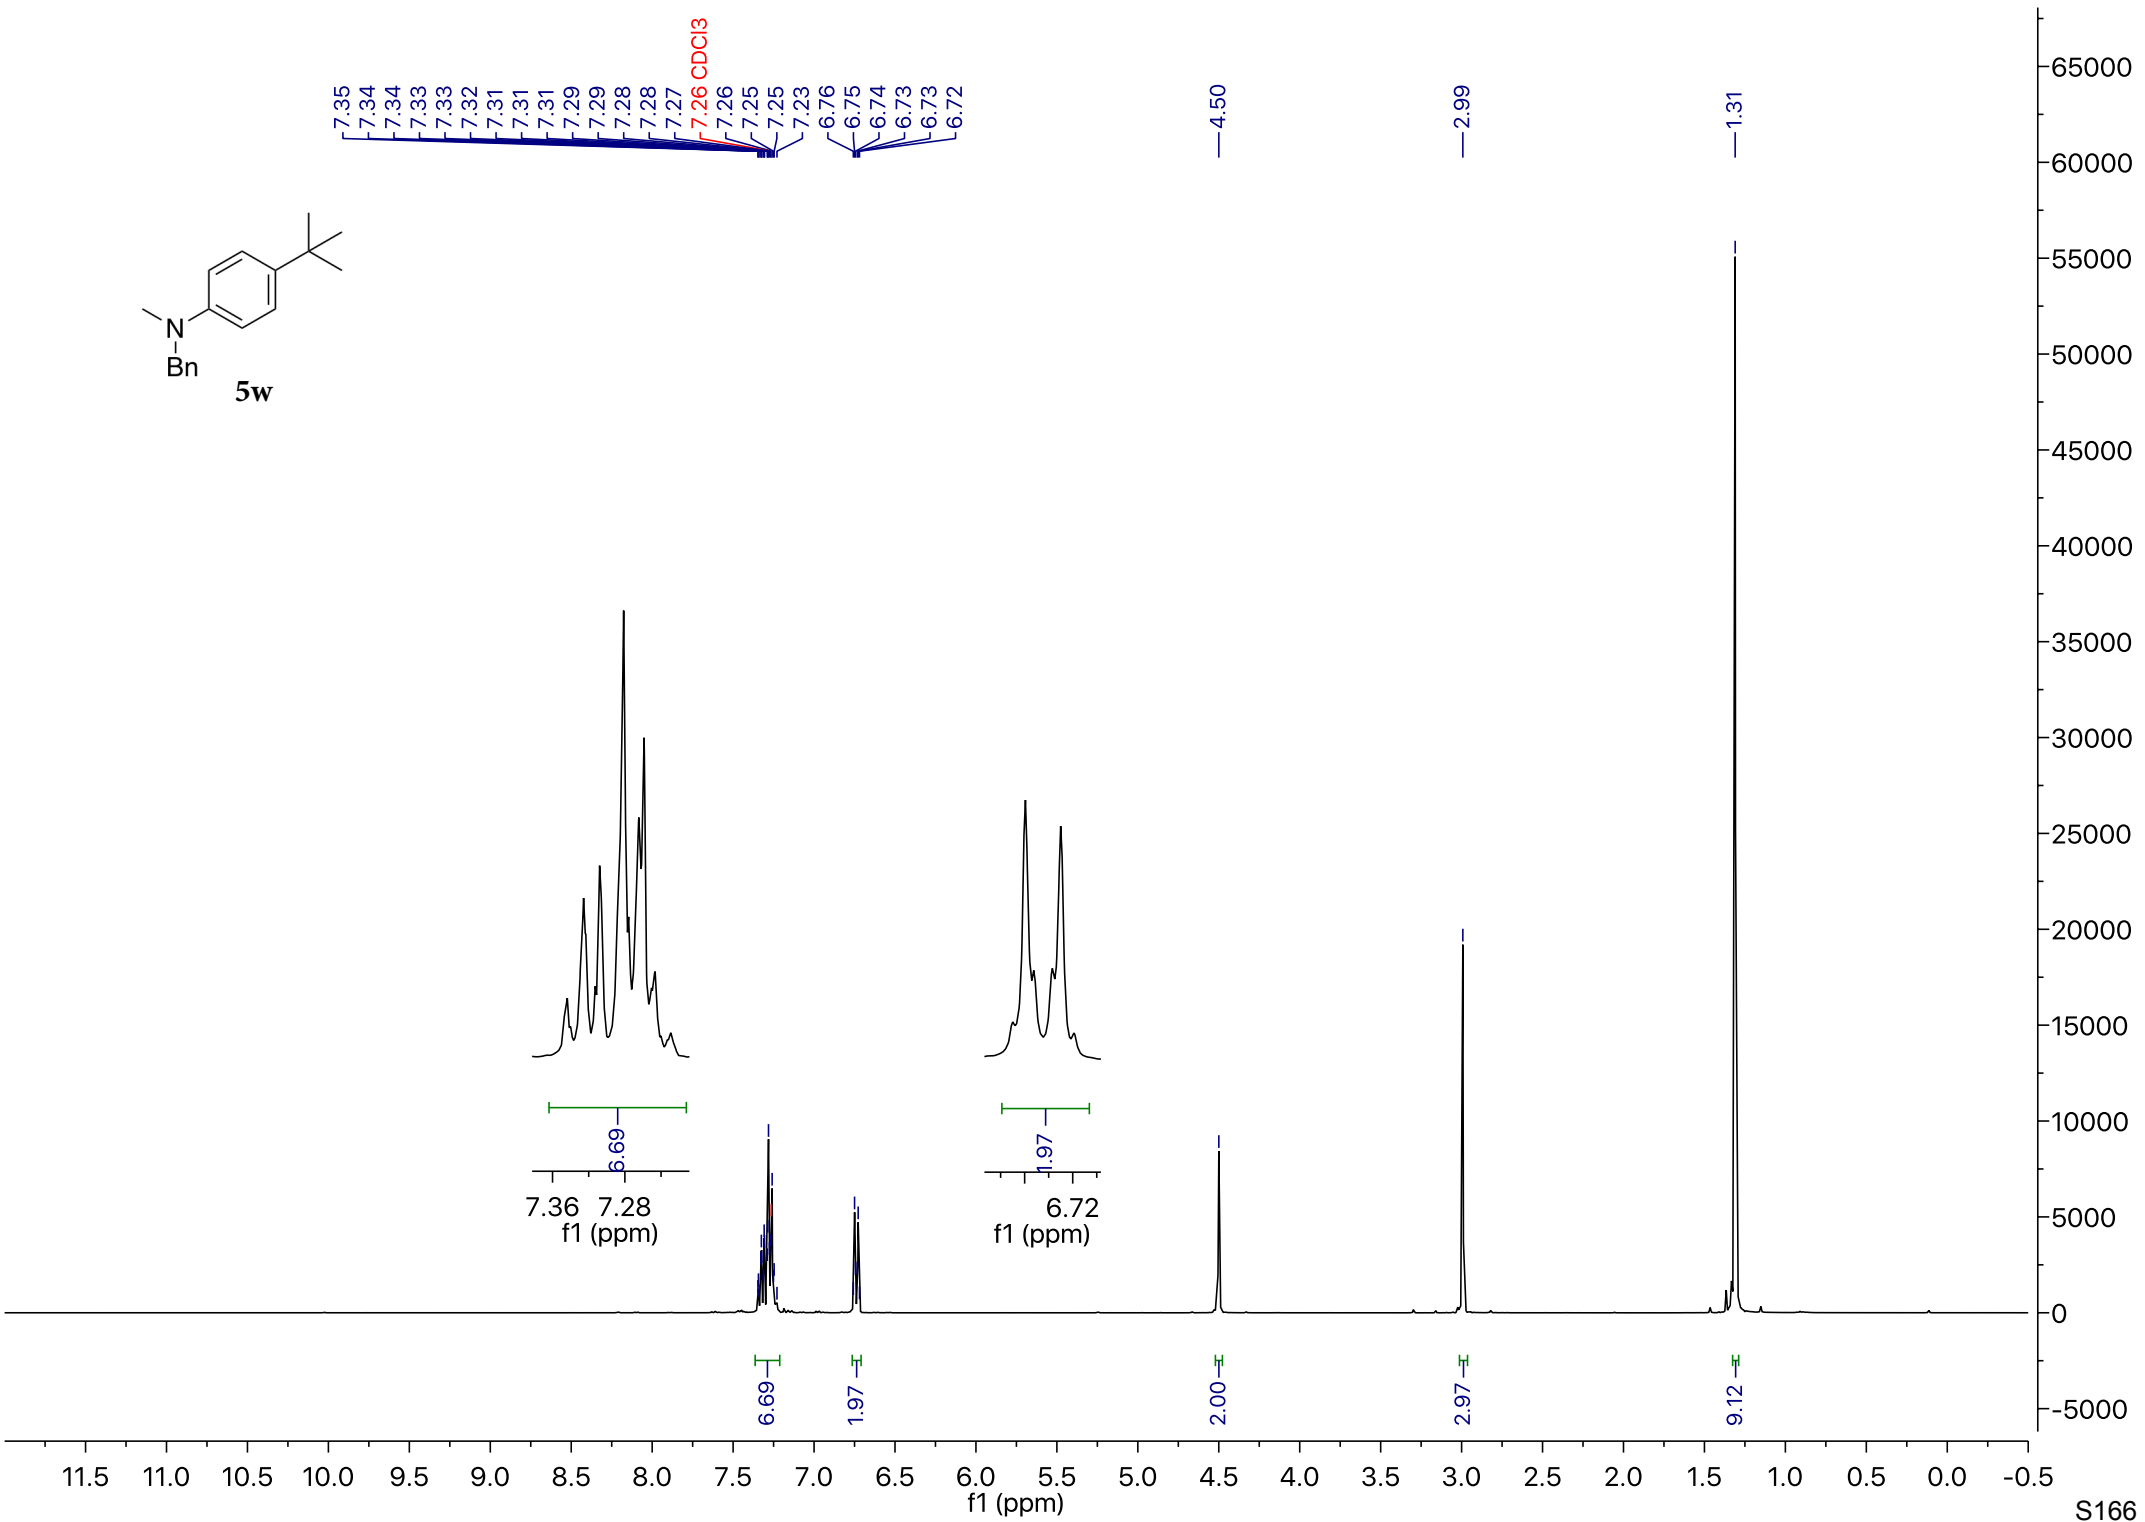

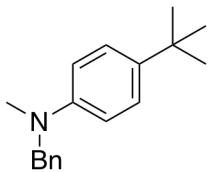

5w

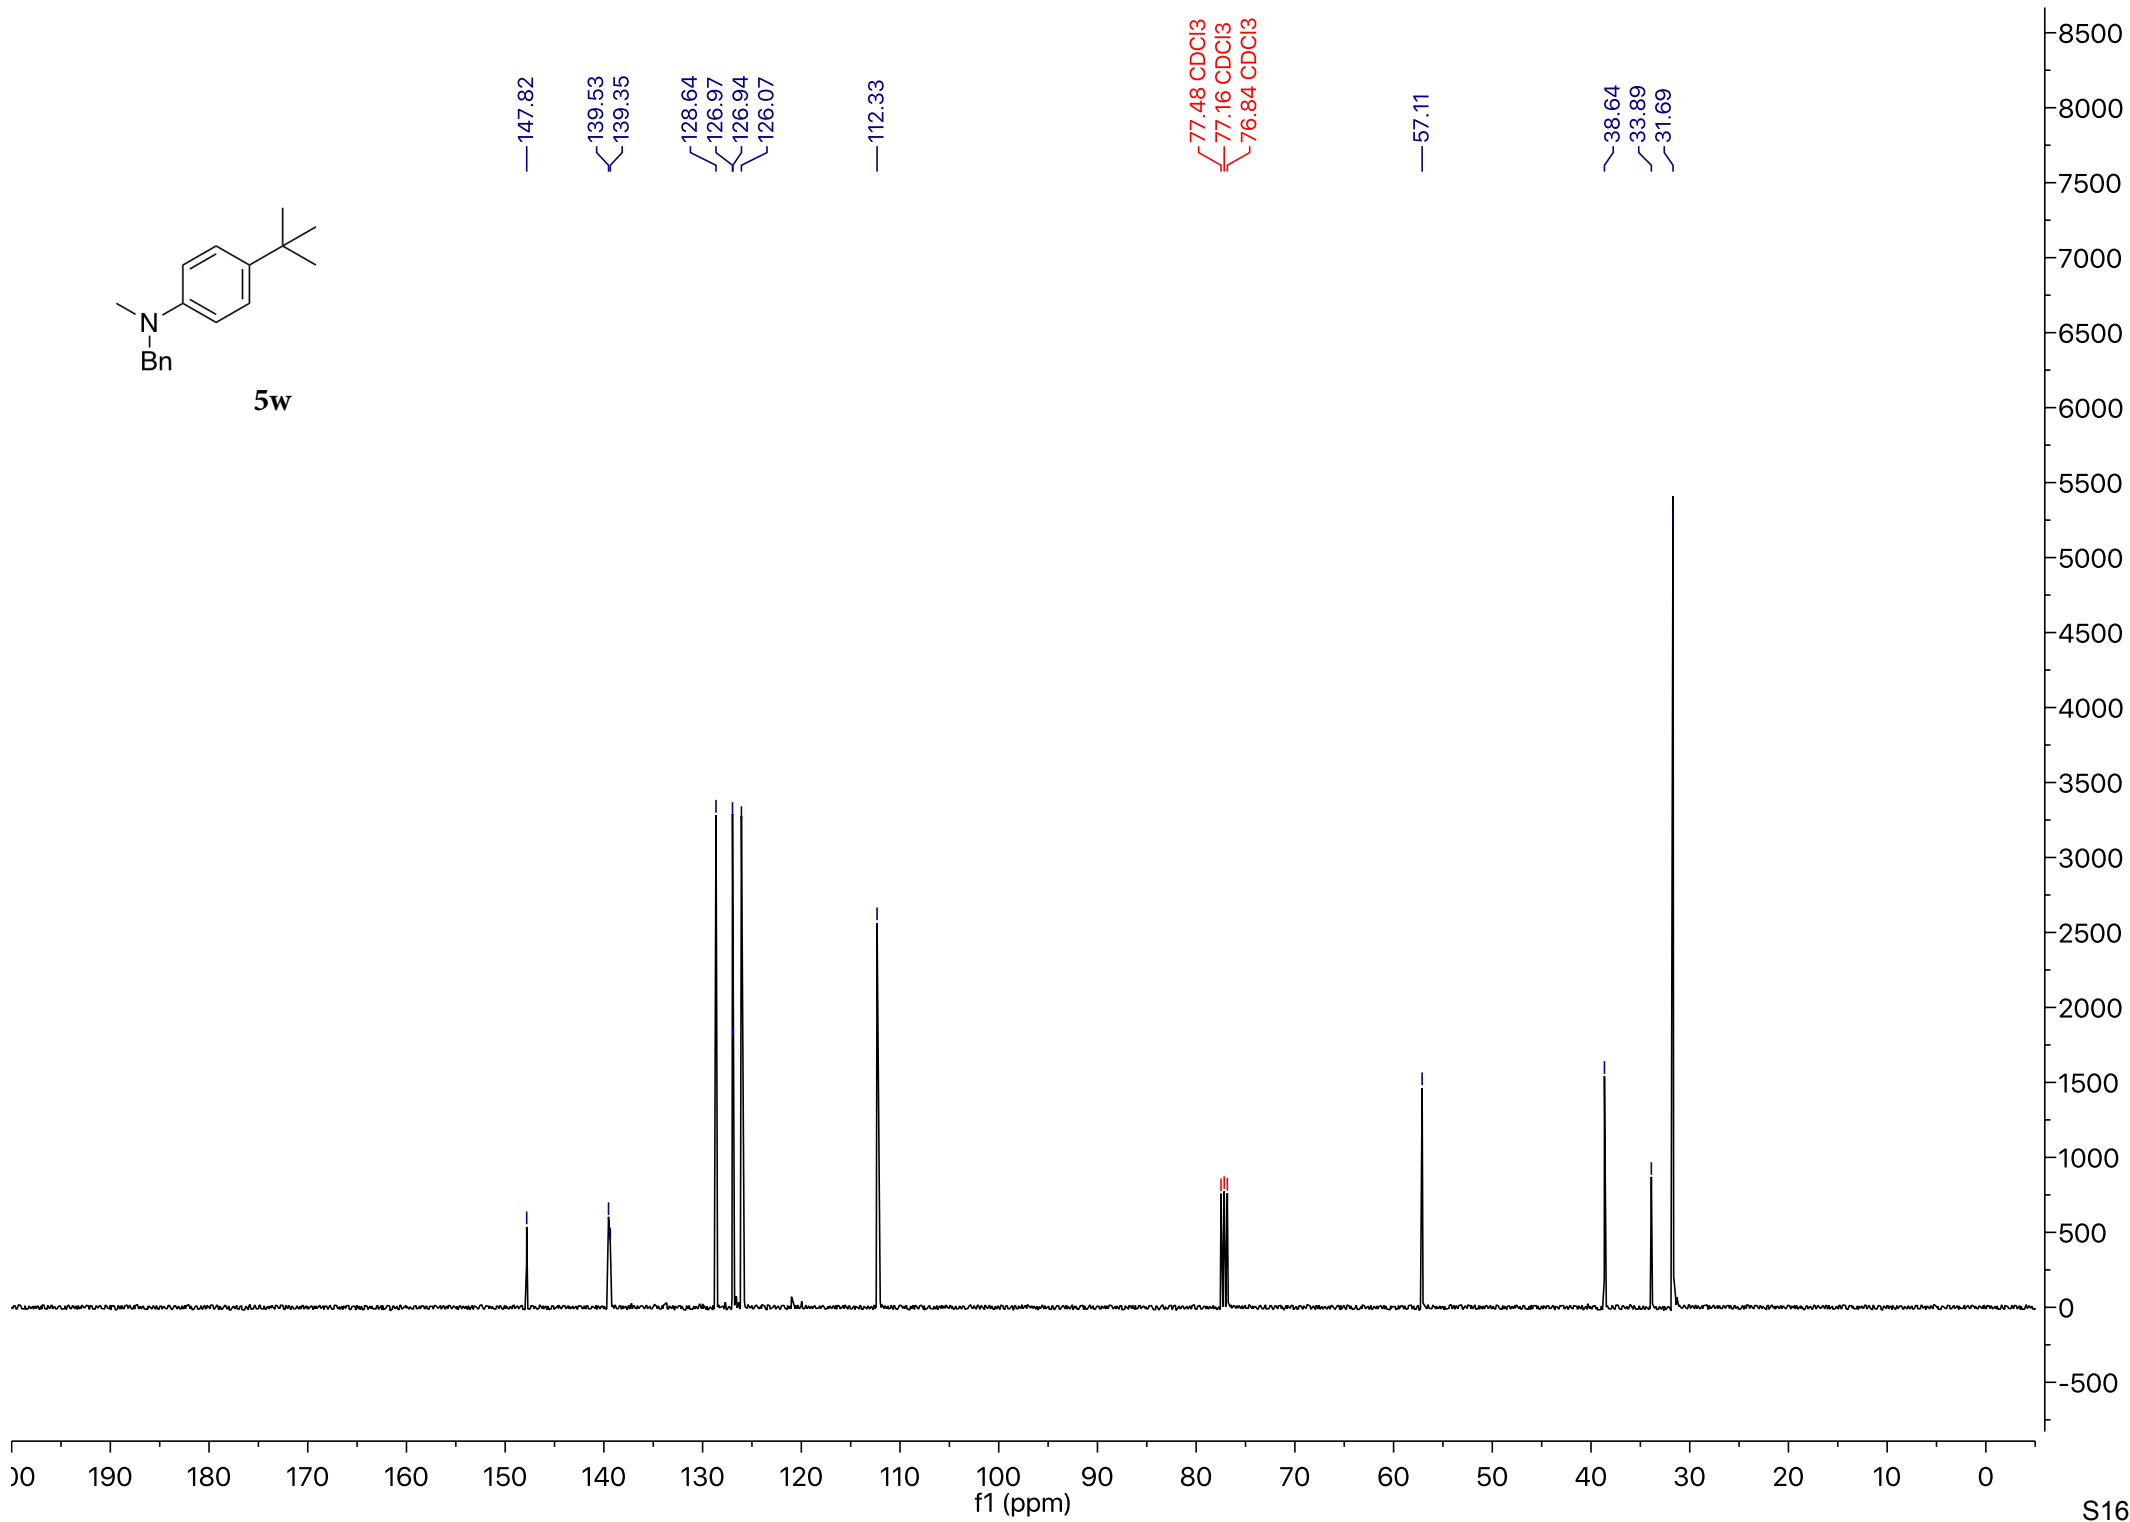

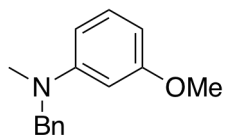

5x

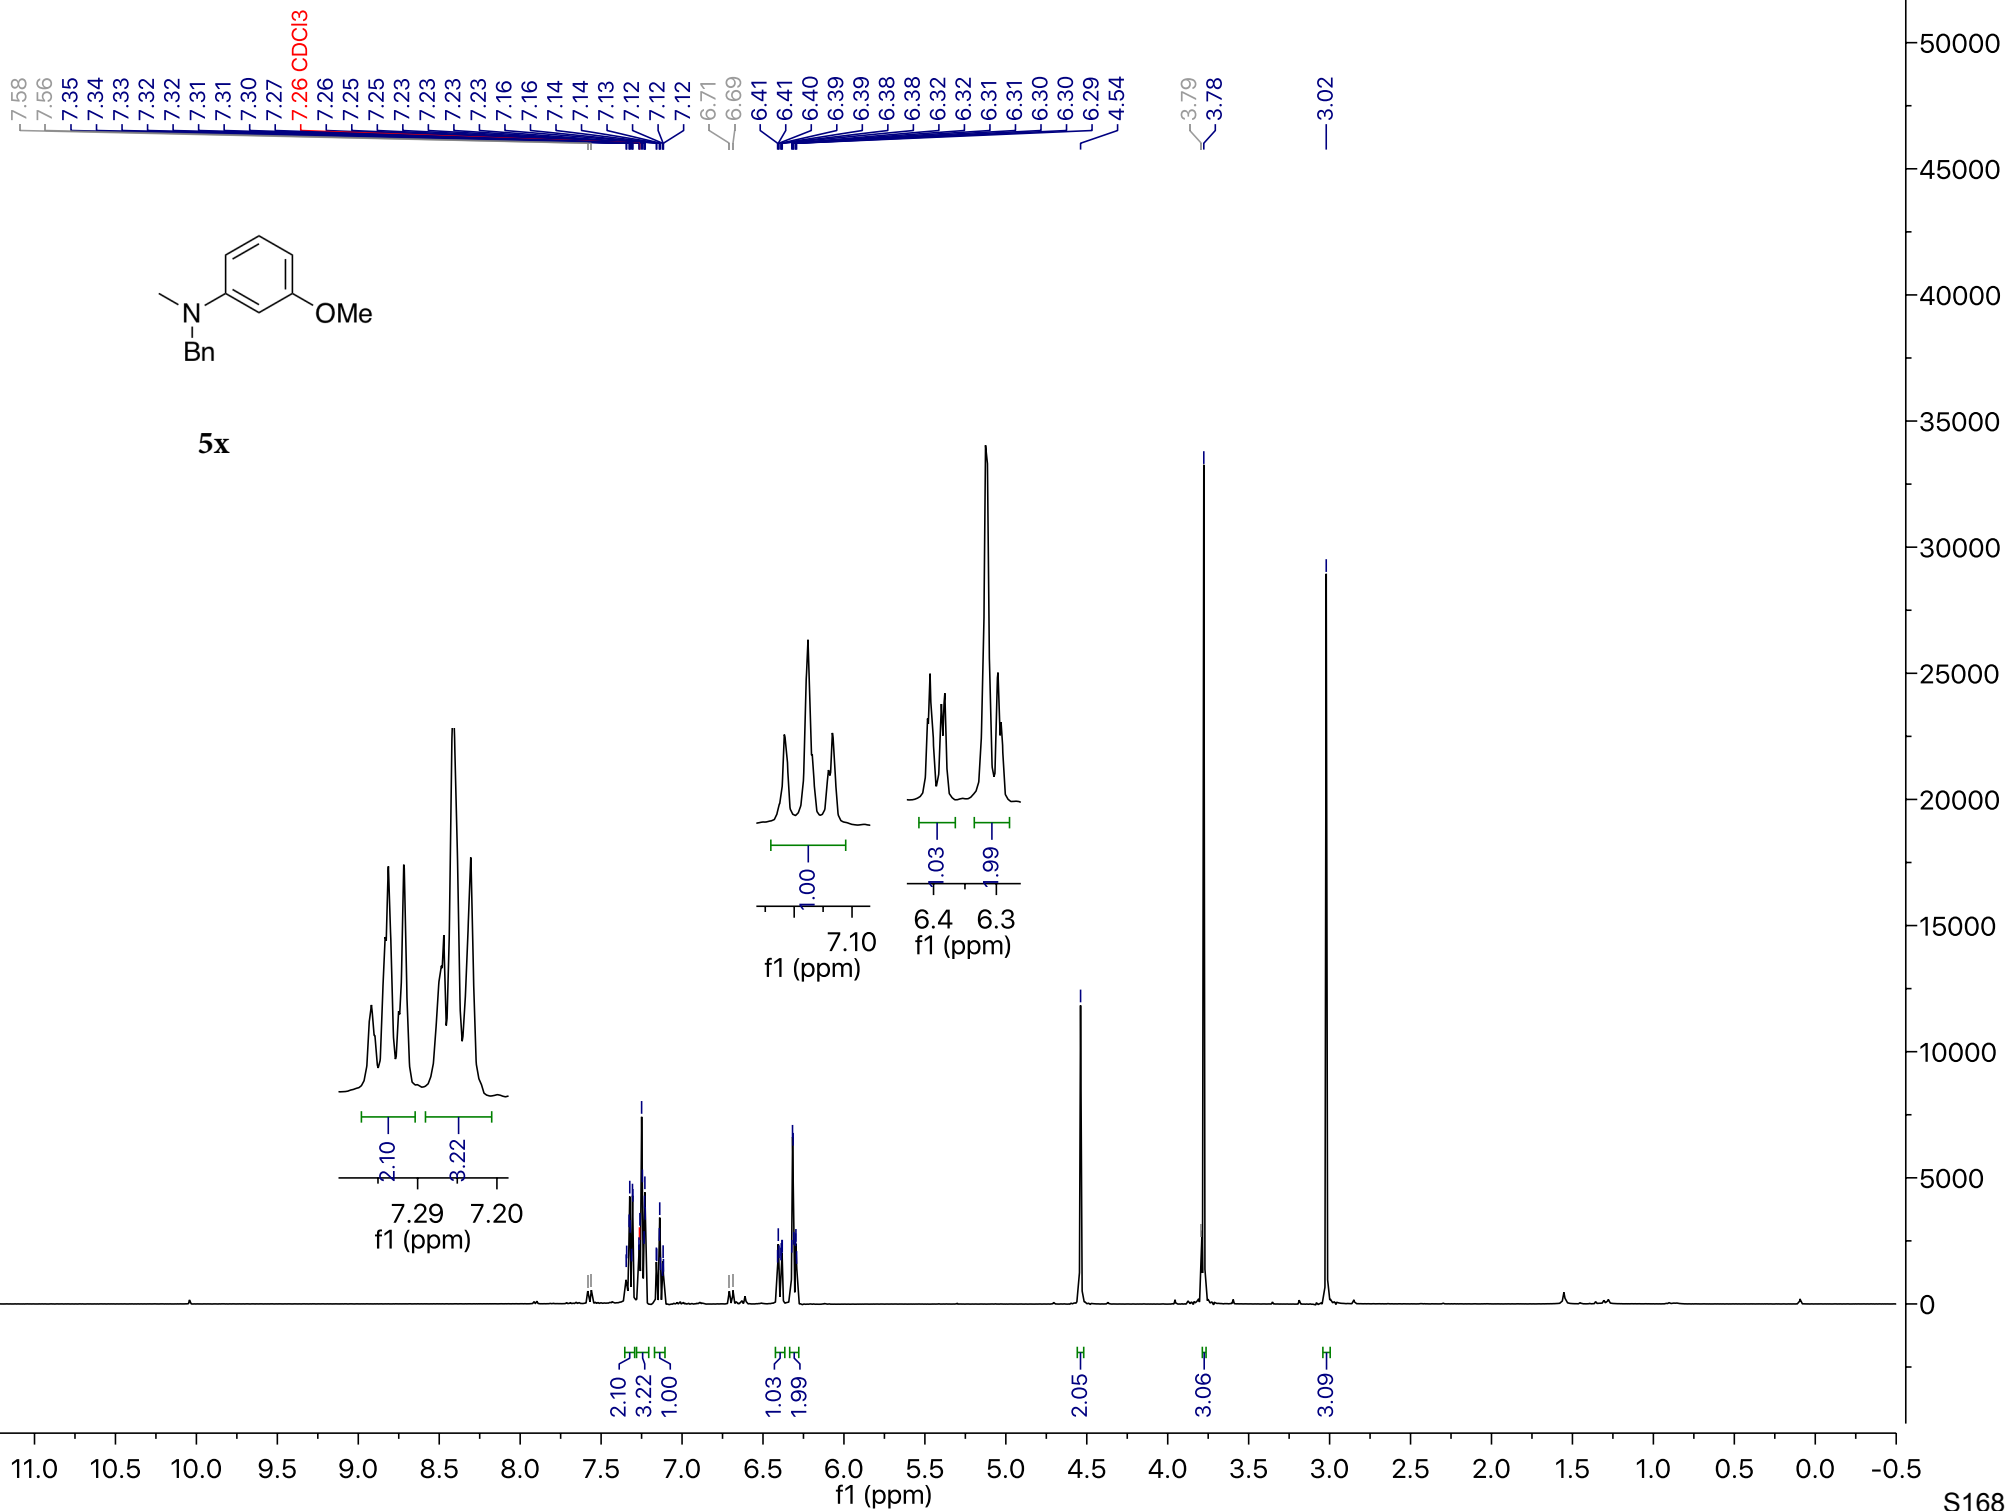

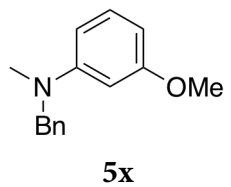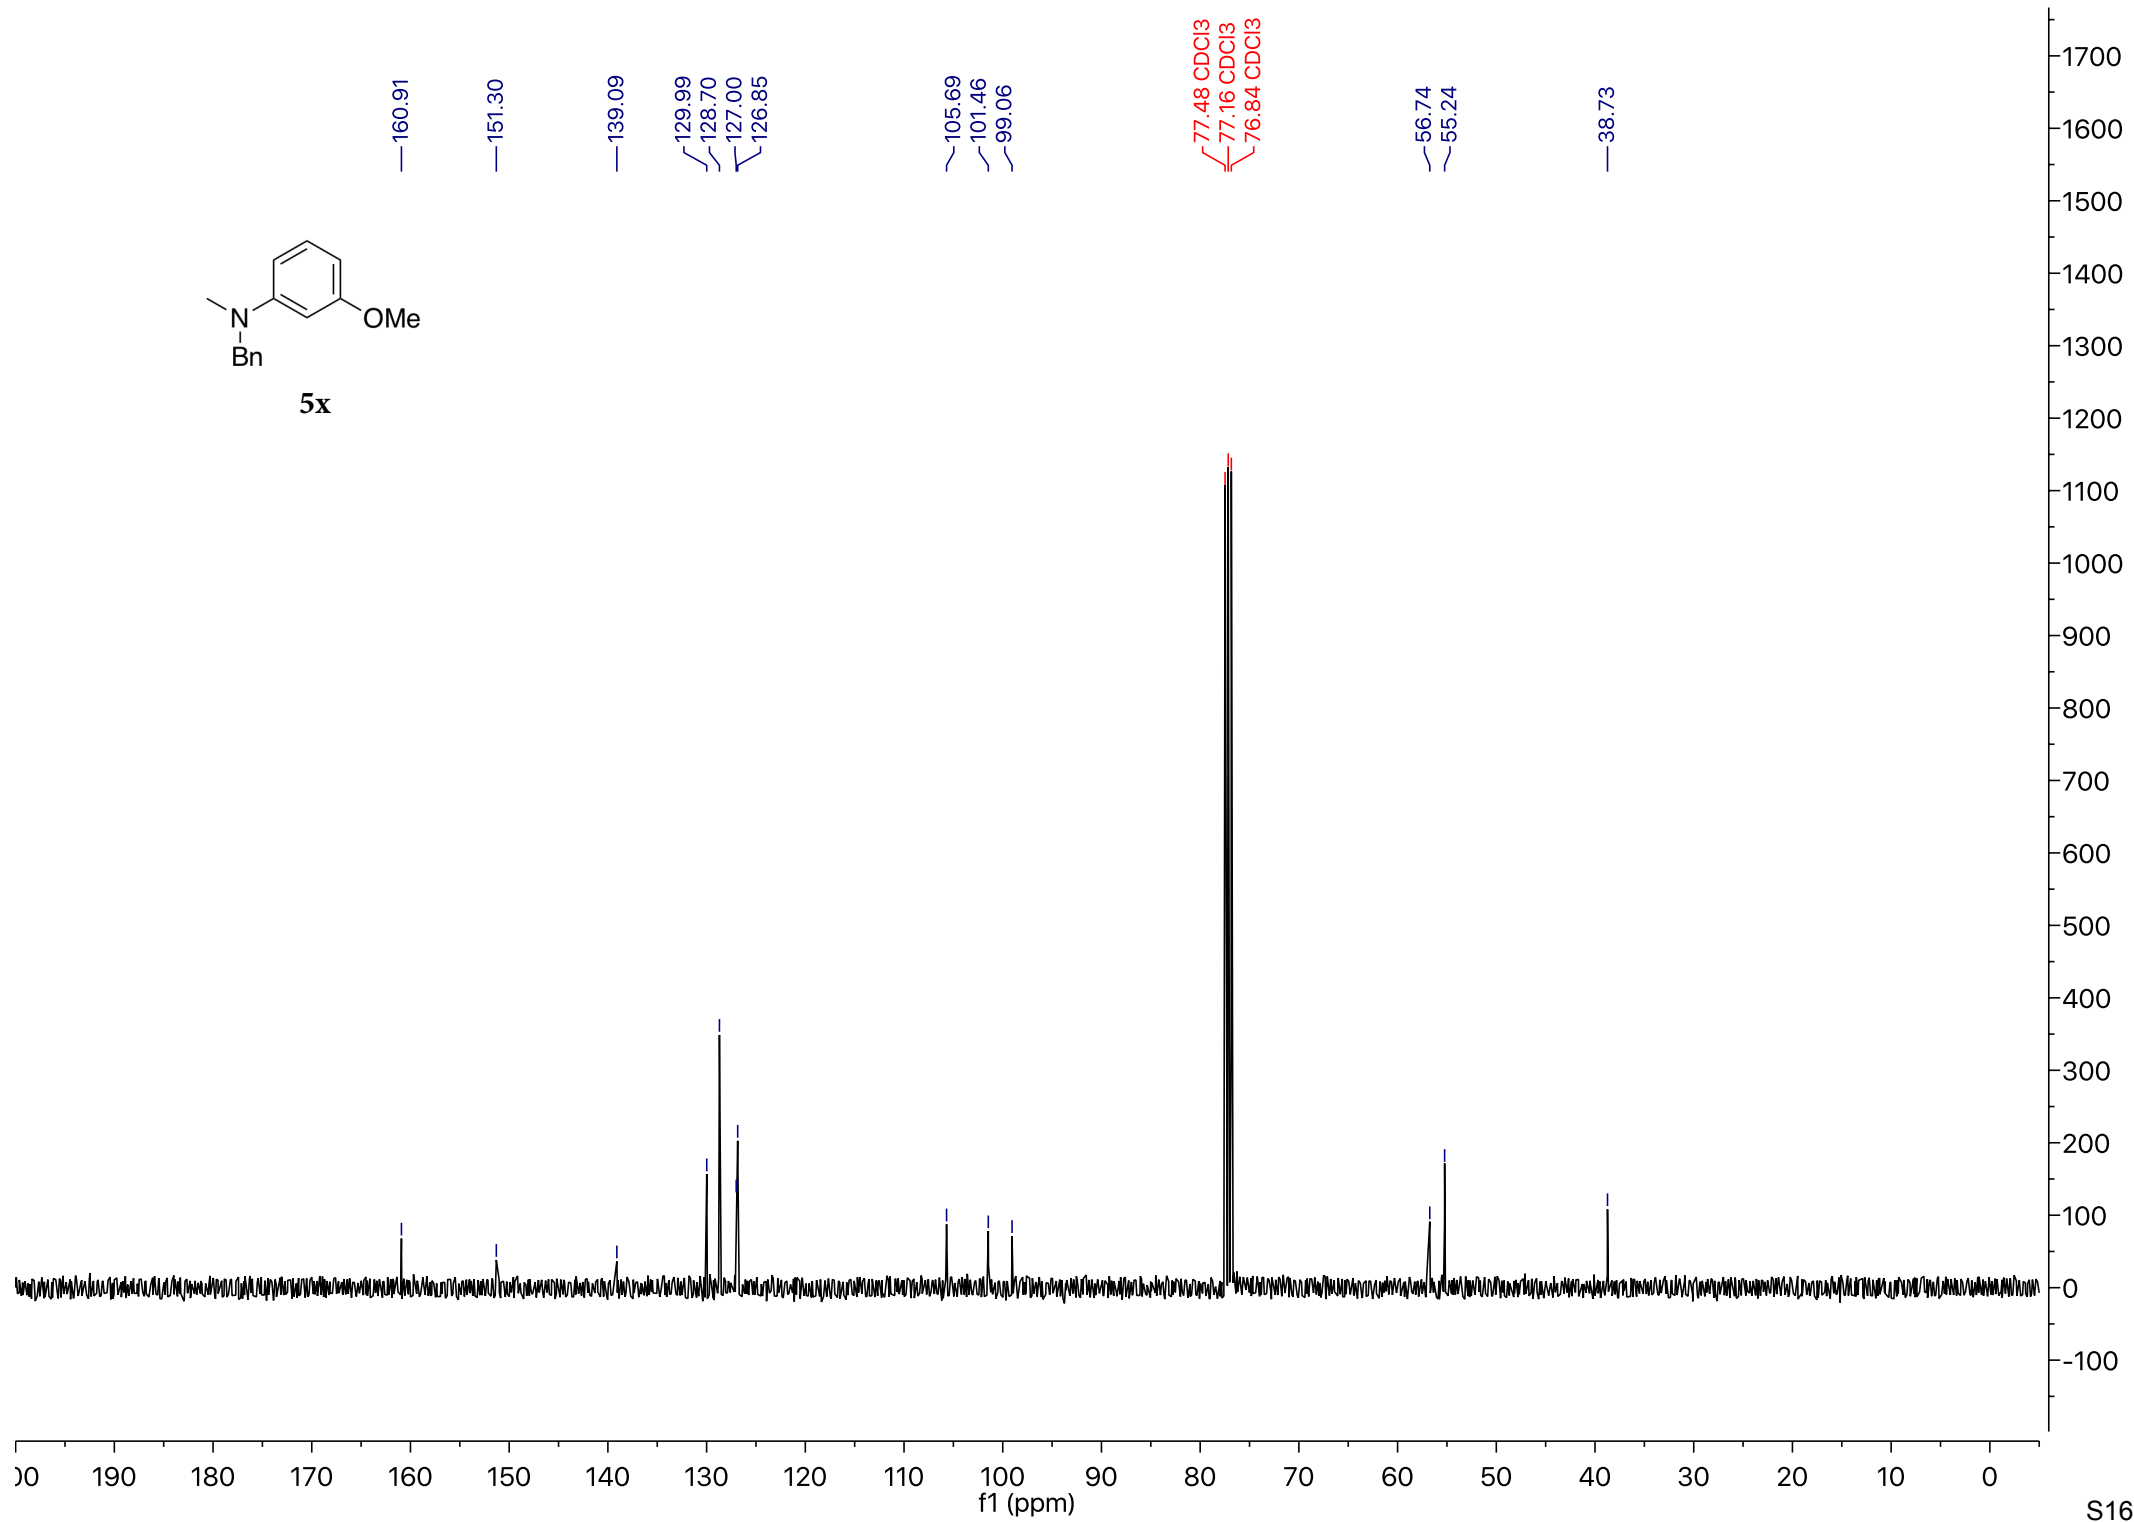

Supplement: ANIE-57-11427-s001.pdf [file ANIE-57-11427-s001.pdf]
